# Supplementary material for: Organocatalytic intramolecular (4 + 2) annulation of enals with ynamides: atroposelective synthesis of axially chiral 7-aryl indolines
Source: Royal Society of Chemistry journal article supplement (doi:10.1039/d3sc01880f), 2023-01-01

Supporting Information

## **Organocatalytic intramolecular (4 + 2) annulation of enals with ynamides: atroposelective synthesis of axially chiral 7- aryl indolines**

Zhi-Xin Zhang,<sup>‡a</sup> Li-Gao Liu,<sup>‡a</sup> Yi-Xi Liu,<sup>a</sup> Jian Lin,<sup>a</sup> Xin Lu,<sup>\*,a</sup> Long-Wu Ye,<sup>a,b,c</sup> and  
Bo Zhou<sup>\*,a</sup>

<sup>a</sup>State Key Laboratory of Physical Chemistry of Solid Surfaces, Key Laboratory of  
Chemical Biology of Fujian Province, and College of Chemistry and Chemical  
Engineering, Xiamen University, Xiamen 361005, China

<sup>b</sup>State Key Laboratory of Organometallic Chemistry, Shanghai Institute of Organic  
Chemistry, Chinese Academy of Sciences, Shanghai 200032, China

<sup>c</sup>State Key Laboratory of Elemento-Organic Chemistry, Nankai University, Tianjin  
300071, China

E-mail: zhoubo@xmu.edu.cn; xinlu@xmu.edu.cn

| <b>Content</b>                                                         | <b>Page Number</b> |
|------------------------------------------------------------------------|--------------------|
| <b>1. General Information</b>                                          | 2                  |
| <b>2. More Reaction Condition and Scope Studies</b>                    | 3                  |
| <b>3. Preparation of Starting Materials</b>                            | 5                  |
| <b>4. General Procedures for the Intramolecular (4 + 2) Annulation</b> | 31                 |
| <b>5. Racemization Experiments</b>                                     | 55                 |
| <b>6. Synthetic Utility Study</b>                                      | 60                 |
| <b>7. Crystal Data</b>                                                 | 63                 |
| <b>8. Computational Studies</b>                                        | 64                 |
| <b>9. HPLC Chromatograms</b>                                           | 133                |
| <b>10. NMR Spectra</b>                                                 | 172                |

## 1. General Information

Acetonitrile (ACS grade), toluene (ACS grade), ethyl acetate (ACS grade), 1,2-dichlorobenzene (ACS grade), chlorobenzene (ACS grade), fluorobenzene (ACS grade), methanol (ACS grade) and hexanes (ACS grade) were obtained commercially and used without further purification. Methylene chloride, tetrahydrofuran and diethyl ether were purified according to standard methods unless otherwise noted. Commercially available reagents were used without further purification. All reactions were carried out with a Titan HMS-14 digital magnetic stirrer with hot plate. Reactions were monitored by thin layer chromatography (TLC) using silicycle pre-coated silica gel plates. Flash column chromatography was performed over silica gel (300-400 mesh). Infrared spectra were recorded on a Nicolet AVATER FTIR330 spectrometer as thin film and are reported in reciprocal centimeter ( $\text{cm}^{-1}$ ). Mass spectra were recorded with Micromass QTOF2 Quadrupole/Time-of-Flight Tandem mass spectrometer using electron spray ionization. X-ray diffraction analysis was recorded on a Rigaku AFC7R X-ray single crystal diffractometer. HPLC analyses were carried out in a chromatograph equipped with a UV diode-array detector using chiral stationary columns from Daicel.

$^1\text{H}$  NMR spectra and  $^{13}\text{C}$  NMR spectra were recorded on a Bruker AV-400 spectrometer and Zhongke Oxford WNMR-I-400MHz spectrometer in chloroform- $\text{d}_3$ . Chemical shifts are reported in ppm with the internal TMS signal at 0.0 ppm as a standard for  $^1\text{H}$  NMR spectra and with the internal chloroform signal at 77.0 ppm as a standard for  $^{13}\text{C}$  NMR spectra. The data is being reported as (s = singlet, d = doublet, t = triplet, m = multiplet or unresolved, brs = broad singlet, coupling constant(s) in Hz, integration).

## 2. More Reaction Condition and Scope Studies

**Supplementary Table 1.** Screening of more reaction conditions for the intramolecular (4 + 2) annulation.<sup>a</sup>

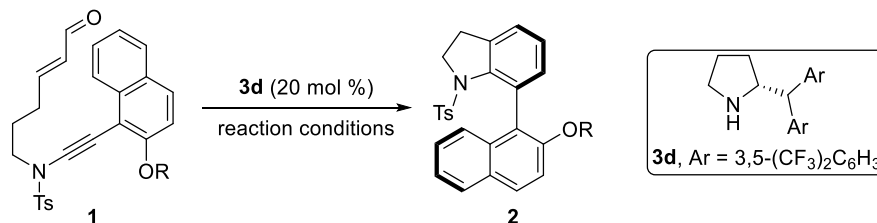

| Entry | R           | Reaction conditions                         | Additives                                 | Yield <sup>b</sup> (%) | Ee <sup>c</sup> (%) |
|-------|-------------|---------------------------------------------|-------------------------------------------|------------------------|---------------------|
| 1     | Me          | DCE, rt, 12 h                               | -                                         | 62 (<5)                | 47                  |
| 2     | <i>i</i> Pr | DCE, rt, 30 h                               | -                                         | 47 (<5)                | 13                  |
| 3     | MOM         | DCE, rt, 48 h                               | -                                         | 53 (<5)                | 56                  |
| 4     | Ts          | DCE, 60 °C, 12 h                            | -                                         | 60 (<5)                | 75                  |
| 5     | Mts         | DCE, 60 °C, 12 h                            | -                                         | 65 (<5)                | 86                  |
| 6     | Mts         | C <sub>6</sub> F <sub>6</sub> , 60 °C, 48 h | -                                         | 46 (<5)                | 85                  |
| 7     | Mts         | MeOH, 60 °C, 12 h                           | -                                         | <5 (95)                | n.d.                |
| 8     | Mts         | DCE, 60 °C, 72 h                            | 3 Å MS                                    | 28 (35)                | 86                  |
| 9     | Mts         | DCE, 60 °C, 36 h                            | 4 Å MS                                    | 60 (<5)                | 86                  |
| 10    | Mts         | DCE, 60 °C, 72 h                            | 5 Å MS                                    | 35 (26)                | 86                  |
| 11    | Mts         | DCE, 60 °C, 12 h                            | H <sub>2</sub> O (20 mol %)               | 46 (<5)                | 86                  |
| 12    | Mts         | DCE, 60 °C, 24 h                            | H <sub>2</sub> O (1 equiv)                | 31 (<5)                | 85                  |
| 13    | Mts         | DCE, 60 °C, 18 h                            | Et <sub>3</sub> N (20 mol %)              | 62 (<5)                | 86                  |
| 14    | Mts         | DCE, 60 °C, 18 h                            | K <sub>2</sub> CO <sub>3</sub> (20 mol %) | 57 (<5)                | 86                  |

<sup>a</sup> Reaction conditions: **1** (0.05 mmol), **3d** (0.01 mmol), solvent (1 mL), rt to 60 °C, 12–72 h, in vials. <sup>b</sup> Measured by <sup>1</sup>H NMR using diethyl phthalate as the internal reference. Recovered unreacted starting material given within parentheses. <sup>c</sup> Determined by HPLC analysis. Mts = 2-mesitylenesulfonyl, DCB = 1,2-dichlorobenzene.

**Supplementary Table 2.** Screening of other ynamides **1ag–1aj** for the intramolecular (4 + 2) annulation.<sup>a</sup>

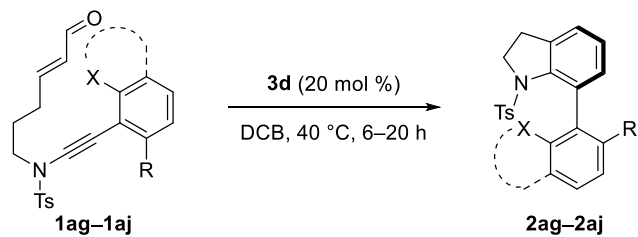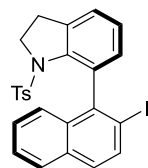

**2ag**, 79%, 25% ee (6 h)

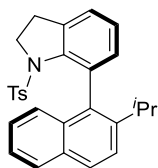

**2ah**, 72%, 35% ee (12 h)

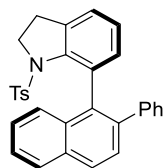

**2ai**, 76%, 46% ee (18 h)

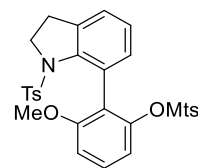

**2aj**, 30%, <5% ee (20 h)

<sup>a</sup> Reaction conditions: **1** (0.1 mmol), **3d** (0.02 mmol), DCB (2 mL), 40 °C, 6–20 h, in vials. Yields are those of isolated products; the ee values are determined by HPLC analysis.



### 3. Preparation of Starting Materials

Compounds **1a–1aj** were prepared according to the following procedures.<sup>1–4</sup>

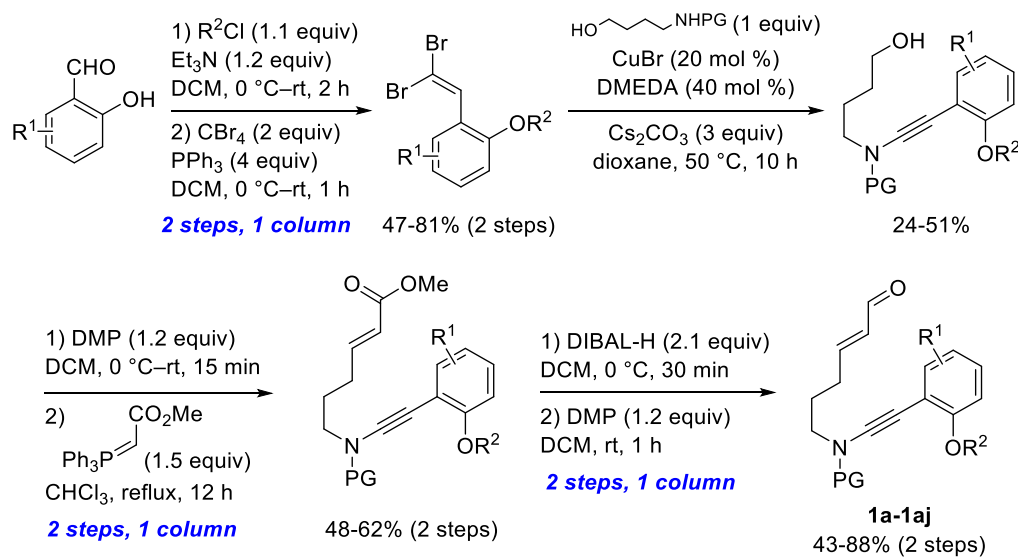

To a solution of salicylaldehyde derivative (20 mmol) in DCM (40 mL), was added  $Et_3N$  (24 mmol, 3.3 mL). After cooling to 0 °C, sulfonyl chloroide ( $R^2Cl$ , 22 mmol) was added to this solution and the reaction mixture was stirred at room temperature for 2 h. Upon completion (monitored by TLC), the reaction was quenched with 1 N HCl, extracted with DCM for three times, dried over  $MgSO_4$  and filtered. The resulting mixture was concentrated under reduced pressure to give crude product without further purification. To the solution of  $PPh_3$  (80 mmol, 20.98 g) in DCM (60 mL) was added  $CBr_4$  (40 mmol, 13.26 g) carefully at 0 °C, and the reaction was stirred at this temperature for additional 15 min. The solution of the above crude product in DCM (20 mL) was then added to the mixture at 0 °C. The reaction mixture was warmed to room temperature and stirred for 1 h. Upon completion (monitored by TLC), the reaction mixture was filtered through a Celite pad and the filtrate was concentrated under reduced pressure. The residue was purified by column chromatography on silica gel (eluent: PE/DCM) to afford the desired product (47–81% yield, 2 steps).

To a solution of the above product (8 mmol) in 1,4-dioxane (40 mL) were added *N*-protected 4-aminobutan-1-ol (8 mmol),  $Cs_2CO_3$  (24 mmol, 7.82 g), DMEDA (3.2 mmol, 0.35 mL) and  $CuBr$  (1.6 mmol, 0.23 g). The reaction was stirred at 50 °C for 10 h. Upon completion (monitored by TLC), the reaction mixture was filtered through a Celite pad

and the filtrate was concentrated under reduced pressure. The residue was purified by column chromatography on silica gel (eluent: PE/EtOAc) to afford the target product (24–51% yield).

To a solution of the above product (2.0 mmol) in DCM (10 mL) was added DMP (2.4 mmol, 1.02 g) at 0 °C. The reaction mixture was warmed to room temperature and stirred for 1 h. Upon completion (monitored by TLC), the reaction was quenched with NaHCO<sub>3</sub> (aq), extracted with DCM for three times, dried over MgSO<sub>4</sub> and filtered. The filtrate was concentrated under reduced pressure to give crude aldehyde product without further purification. To a solution of the above crude aldehyde in CHCl<sub>3</sub> (6 mL) was added methyl 2-(triphenyl-λ<sup>5</sup>-phosphanylidene)acetate (3 mmol, 1.00 g). The reaction was heated to reflux and stirred for 12 h. The progress of the reaction was monitored by TLC. Upon completion, the reaction mixture was concentrated and purified by column chromatography on silica gel (eluent: PE/EtOAc) to give unsaturated ester (48–62% yield, 2 steps).

To a solution of the above unsaturated ester (1.0 mmol) in DCM (5 mL) was added DIBAL-H (1.5 N in toluene, 2.1 mmol, 1.4 mL) at 0 °C dropwise. After stirring at 0 °C for 30 min, the reaction was carefully quenched with 1 N HCl, extracted with DCM for three times, dried over MgSO<sub>4</sub> and filtered. The filtrate was concentrated under reduced pressure to give crude alcohol product without further purification. The residue was dissolved in DCM (5 mL), and DMP (1.2 mmol, 0.51 g) was added at 0 °C. The reaction mixture was warmed to room temperature and stirred for 1 h. Upon completion (monitored by TLC), the reaction was diluted by DCM and was quenched with NaHCO<sub>3</sub> (aq). The mixture was extracted with DCM for three times, dried over MgSO<sub>4</sub> and filtered. The filtrate was concentrated under reduced pressure and purified by column chromatography on silica gel (eluent: PE/EtOAc) to afford the desired ynamide **1a–1aj** (43–88% yield, 2 steps).

**(E)-1-(((4-methyl-N-(6-oxohex-4-en-1-yl)phenyl)sulfonamido)ethynyl)naphthalen-2-yl 2,4,6-trimethylbenzenesulfonate (1a)**

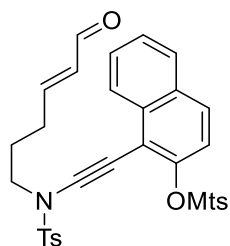

**1a**

Compound **1a** was prepared in 78% yield (481 mg) with  $E/Z = 15/1$  according to the general procedure as a pale yellow oil.  $^1\text{H NMR}$  (400 MHz,  $\text{CDCl}_3$ )  $\delta$  9.49 (d,  $J = 8.0$  Hz, 1H), 8.34 (d,  $J = 8.4$  Hz, 1H), 7.91 (d,  $J = 8.0$  Hz, 2H), 7.76 (d,  $J = 8.0$  Hz, 1H), 7.63 – 7.48 (m, 3H), 7.34 (d,  $J = 8.0$  Hz, 2H), 6.98 (s, 2H), 6.94 – 6.87 (m, 1H), 6.60 (d,  $J = 9.2$  Hz, 1H), 6.13 (dd,  $J = 15.6, 8.0$  Hz, 1H), 3.56 (t,  $J = 6.8$  Hz, 2H), 2.54 (s, 6H), 2.51 – 2.46 (m, 2H), 2.42 (s, 3H), 2.33 (s, 3H), 2.14 – 2.06 (m, 2H);  $^{13}\text{C NMR}$  (100 MHz,  $\text{CDCl}_3$ )  $\delta$  194.0, 157.2, 147.2, 144.9, 143.9, 140.0, 134.4, 133.5, 133.3, 131.8, 131.7, 131.2, 129.9, 128.5, 127.9, 127.6, 127.5, 126.6, 126.4, 119.0, 115.2, 92.1, 65.2, 50.9, 29.3, 25.9, 22.6, 21.5, 21.0; IR (neat): 3059 (bs), 2234 (s), 1688, 1595, 1507, 1367, 1170, 1090, 951, 790, 568; HRESIMS Calcd for  $[\text{C}_{34}\text{H}_{33}\text{NNaO}_6\text{S}_2]^+$  ( $\text{M} + \text{Na}^+$ ) 638.1642, found 638.1645.

**(E)-1-(((4-methoxy-N-(6-oxohex-4-en-1-yl)phenyl)sulfonamido)ethynyl)naphthalen-2-yl 2,4,6-trimethylbenzenesulfonate (1b)**

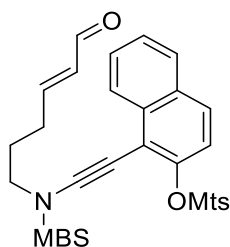

**1b**

Compound **1b** was prepared in 56% yield (352 mg) with  $E/Z = 19/1$  according to the general procedure as a pale yellow oil.  $^1\text{H NMR}$  (400 MHz,  $\text{CDCl}_3$ )  $\delta$  9.49 (d,  $J = 8.0$  Hz, 1H), 8.33 (d,  $J = 8.4$  Hz, 1H), 7.96 (d,  $J = 8.8$  Hz, 2H), 7.77 (d,  $J = 8.1$  Hz, 1H), 7.63 – 7.59 (m, 1H), 7.56 – 7.48 (m, 2H), 7.03 – 6.99 (m, 4H), 6.94 – 6.87 (m, 1H), 6.60 (d,  $J = 8.8$  Hz, 1H), 6.14 (dd,  $J = 15.6, 8.0$  Hz, 1H), 3.85 (s, 3H), 3.55 (t,  $J = 6.8$

Hz, 2H), 2.54 (s, 6H), 2.52 – 2.46 (m, 2H), 2.34 (s, 3H), 2.14 – 2.06 (m, 2H);  $^{13}\text{C}$  NMR (100 MHz,  $\text{CDCl}_3$ )  $\delta$  194.0, 163.8, 157.2, 147.3, 143.9, 140.1, 133.6, 133.3, 131.8, 131.3, 129.8, 128.9, 128.4, 128.0, 127.6, 126.6, 126.5, 119.1, 115.3, 114.5, 92.4, 65.3, 55.6, 50.8, 29.4, 26.0, 22.7, 21.0; IR (neat): 2940 (bs), 2241 (s), 1688, 1467, 1363, 1191, 1074, 798, 541; HRESIMS Calcd for  $[\text{C}_{34}\text{H}_{33}\text{NNaO}_7\text{S}_2]^+$  ( $\text{M} + \text{Na}^+$ ) 654.1591, found 654.1595.

**(E)-1-(((2,4,6-trimethyl-N-(6-oxohex-4-en-1-yl)phenyl)sulfonamido)ethynyl)naphthalen-2-yl 2,4,6-trimethylbenzenesulfonate (1c)**

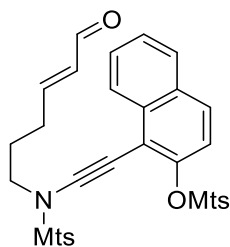

**1c**

Compound **1c** was prepared in 43% yield (277 mg) with  $E/Z > 20/1$  according to the general procedure as a pale yellow solid (mp 149–151 °C).  $^1\text{H}$  NMR (400 MHz,  $\text{CDCl}_3$ )  $\delta$  9.48 (d,  $J = 7.6$  Hz, 1H), 7.81 (d,  $J = 7.6$  Hz, 1H), 7.72 (d,  $J = 7.6$  Hz, 1H), 7.50 (d,  $J = 8.8$  Hz, 1H), 7.47 – 7.39 (m, 2H), 7.06 – 6.98 (m, 4H), 6.93 – 6.86 (m, 1H), 6.60 (d,  $J = 8.8$  Hz, 1H), 6.13 (dd,  $J = 15.6, 7.8$  Hz, 1H), 3.65 (t,  $J = 6.8$  Hz, 2H), 2.70 (s, 6H), 2.56 (s, 6H), 2.52 – 2.49 (m, 2H), 2.35 (s, 3H), 2.34 (s, 3H), 2.23 – 2.16 (m, 2H);  $^{13}\text{C}$  NMR (100 MHz,  $\text{CDCl}_3$ )  $\delta$  194.0, 157.3, 147.2, 143.9, 141.0, 140.1, 133.4, 132.2, 131.9, 131.5, 131.3, 128.2, 127.9, 127.1, 126.5, 119.1, 115.6, 92.0, 66.4, 49.8, 29.5, 26.2, 23.0, 22.7, 21.0; IR (neat): 2940 (bs), 2235 (s), 1682, 1649, 1364, 1173, 949, 727, 542; HRESIMS Calcd for  $[\text{C}_{36}\text{H}_{37}\text{NNaO}_6\text{S}_2]^+$  ( $\text{M} + \text{Na}^+$ ) 666.1955, found 666.1951.

**(E)-1-((N-(6-oxohex-4-en-1-yl)phenyl)sulfonamido)ethynyl)naphthalen-2-yl 2,4,6-trimethylbenzenesulfonate (1d)**

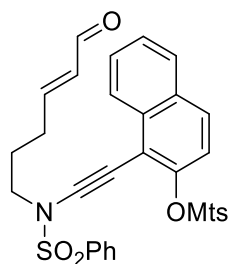

**1d**

Compound **1d** was prepared in 51% yield (305 mg) with *E/Z* = 16/1 according to the general procedure as a pale yellow oil. <sup>1</sup>H NMR (400 MHz, CDCl<sub>3</sub>) δ 9.49 (d, *J* = 8.0 Hz, 1H), 8.33 (d, *J* = 8.0 Hz, 1H), 8.04 (dd, *J* = 8.4, 0.8 Hz, 2H), 7.77 (d, *J* = 8.0 Hz, 1H), 7.68 – 7.49 (m, 6H), 6.99 (s, 2H), 6.93 – 6.86 (m, 1H), 6.60 (d, *J* = 9.2 Hz, 1H), 6.13 (dd, *J* = 15.6, 8.0 Hz, 1H), 3.57 (t, *J* = 7.2 Hz, 2H), 2.54 (s, 6H), 2.51 – 2.45 (m, 2H), 2.34 (s, 3H), 2.14 – 2.06 (m, 2H); <sup>13</sup>C NMR (100 MHz, CDCl<sub>3</sub>) δ 194.0, 157.1, 147.4, 143.9, 140.1, 137.5, 133.8, 133.6, 133.4, 131.8, 131.7, 131.3, 129.4, 128.6, 128.0, 127.7, 127.5, 126.7, 126.5, 119.1, 115.2, 91.9, 65.3, 51.0, 29.3, 26.0, 22.7, 21.0; IR (neat): 2956 (bs), 2236 (s), 1680, 1649, 1364, 1172, 949, 729, 552; HRESIMS Calcd for [C<sub>33</sub>H<sub>31</sub>NNaO<sub>6</sub>S<sub>2</sub>]<sup>+</sup> (*M* + Na<sup>+</sup>) 624.1485, found 624.1486.

**(*E*)-1-(((4-bromo-*N*-(6-oxohex-4-en-1-yl)phenyl)sulfonamido)ethynyl)naphthalen-2-yl 2,4,6-trimethylbenzenesulfonate**  
**(1e)**

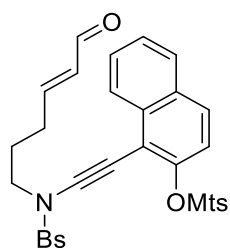

**1e**

Compound **1e** was prepared in 62% yield (423 mg) with *E/Z* = 8/1 according to the general procedure as a pale yellow oil. <sup>1</sup>H NMR (400 MHz, CDCl<sub>3</sub>) δ 9.50 (d, *J* = 7.6 Hz, 1H), 8.29 (d, *J* = 8.4 Hz, 1H), 7.90 (d, *J* = 8.4 Hz, 2H), 7.78 (d, *J* = 8.0 Hz, 1H), 7.70 (d, *J* = 8.4 Hz, 2H), 7.64 – 7.50 (m, 3H), 7.00 (s, 2H), 6.94 – 6.87 (m, 1H), 6.58 (d, *J* = 8.8 Hz, 1H), 6.16 (dd, *J* = 15.6, 7.6 Hz, 1H), 3.58 (t, *J* = 7.2 Hz, 2H), 2.54 (s,

6H), 2.52 – 2.48 (m, 2H), 2.35 (s, 3H), 2.19 – 2.09 (m, 2H);  $^{13}\text{C}$  NMR (100 MHz,  $\text{CDCl}_3$ )  $\delta$  194.0, 156.9, 147.7, 144.0, 140.1, 136.3, 133.6, 133.4, 132.7, 131.9, 131.7, 131.3, 129.1, 129.0, 128.9, 128.1, 127.8, 126.7, 126.3, 119.1, 115.0, 91.5, 65.4, 51.2, 29.3, 26.1, 22.7, 21.1; IR (neat): 2942 (bs), 2237 (s), 1689, 1367, 1175, 952, 782, 534; HRESIMS Calcd for  $[\text{C}_{33}\text{H}_{30}\text{BrNNaO}_6\text{S}_2]^+$  ( $\text{M} + \text{Na}^+$ ) 702.0590, found 702.0598.

**(E)-1-((N-(6-oxohex-4-en-1-yl)methylsulfonamido)ethynyl)naphthalen-2-yl 2,4,6-trimethylbenzenesulfonate (1f)**

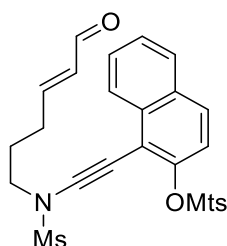

**1f**

Compound **1f** was prepared in 44% yield (235 mg) with  $E/Z > 20/1$  according to the general procedure as a pale yellow oil.  $^1\text{H}$  NMR (400 MHz,  $\text{CDCl}_3$ )  $\delta$  9.52 (dd,  $J = 8.0$ , 0.8 Hz, 1H), 8.29 (d,  $J = 8.4$  Hz, 1H), 7.77 (d,  $J = 8.0$  Hz, 1H), 7.63 – 7.49 (m, 3H), 7.03 (s, 2H), 6.98 – 6.91 (m, 1H), 6.54 (d,  $J = 8.8$  Hz, 1H), 6.20 (dd,  $J = 15.6$ , 8.8 Hz, 1H), 3.74 (t,  $J = 7.2$  Hz, 2H), 3.27 (s, 3H), 2.58 (s, 6H), 2.60 – 2.54 (m, 2H), 2.37 (s, 3H), 2.24 – 2.16 (m, 2H);  $^{13}\text{C}$  NMR (100 MHz,  $\text{CDCl}_3$ )  $\delta$  194.0, 156.8, 147.9, 144.0, 140.2, 133.6, 133.5, 131.9, 131.8, 131.4, 129.0, 128.0, 127.8, 126.8, 126.5, 119.1, 115.3, 91.5, 65.5, 51.2, 38.7, 29.4, 26.5, 22.8, 21.1; IR (neat): 3061 (bs), 2234 (s), 1687, 1367, 1171, 950, 824, 671, 544, 521; HRESIMS Calcd for  $[\text{C}_{28}\text{H}_{29}\text{NNaO}_6\text{S}_2]^+$  ( $\text{M} + \text{Na}^+$ ) 562.1329, found 562.1333.

**(E)-1-(((4-methyl-N-(6-oxohex-4-en-1-yl)phenyl)sulfonamido)ethynyl)naphthalen-2-yl 4-methylbenzenesulfonate (1g)**

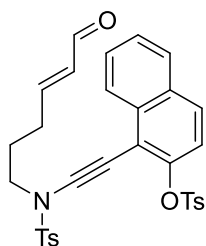

**1g**

Compound **1g** was prepared in 56% yield (332 mg) with  $E/Z = 8/1$  according to the general procedure as a white solid (mp 127–129 °C).  $^1\text{H}$  NMR (400 MHz,  $\text{CDCl}_3$ )  $\delta$  9.50 (d,  $J = 7.6$  Hz, 1H), 8.23 (d,  $J = 8.4$  Hz, 1H), 7.92 (d,  $J = 8.0$  Hz, 2H), 7.79 (d,  $J = 8.0$  Hz, 1H), 7.75 (d,  $J = 8.0$  Hz, 2H), 7.66 – 7.49 (m, 3H), 7.37 (d,  $J = 8.0$  Hz, 2H), 7.28 (d,  $J = 8.0$  Hz, 2H), 6.98 (d,  $J = 8.8$  Hz, 1H), 6.93 – 6.85 (m, 1H), 6.13 (dd,  $J = 15.6, 7.8$  Hz, 1H), 3.54 (t,  $J = 6.8$  Hz, 2H), 2.52 – 2.46 (m, 2H), 2.44 (s, 3H), 2.42 (s, 3H), 2.11 – 2.04 (m, 2H);  $^{13}\text{C}$  NMR (100 MHz,  $\text{CDCl}_3$ )  $\delta$  194.0, 156.9, 147.4, 145.5, 145.0, 134.5, 133.5, 133.4, 132.9, 131.4, 130.0, 129.8, 128.6, 128.5, 128.1, 127.6, 126.7, 126.4, 120.0, 114.8, 92.1, 65.0, 51.0, 29.3, 26.1, 21.7, 21.6; IR (neat): 2925 (bs), 2234 (s), 1689, 1595, 1495, 1371, 1175, 1092, 951, 817, 672; HRESIMS Calcd for  $[\text{C}_{32}\text{H}_{29}\text{NNaO}_6\text{S}_2]^+$  ( $M + \text{Na}^+$ ) 610.1329, found 610.1325.

**(E)-1-(((4-methyl-*N*-(6-oxohex-4-en-1-yl)phenyl)sulfonamido)ethynyl)naphthalen-2-yl-4-methoxybenzenesulfonate (1h)**

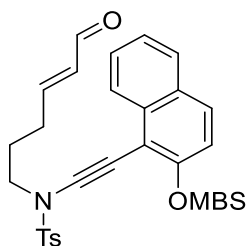

**1h**

Compound **1h** was prepared in 52% yield (316 mg) with  $E/Z > 20/1$  according to the general procedure as a pale yellow solid (mp 123–125 °C).  $^1\text{H}$  NMR (400 MHz,  $\text{CDCl}_3$ )  $\delta$  9.50 (d,  $J = 7.6$  Hz, 1H), 8.20 (d,  $J = 8.4$  Hz, 1H), 7.92 (d,  $J = 8.0$  Hz, 2H), 7.80 – 7.77 (m, 3H), 7.65 (d,  $J = 9.2$  Hz, 1H), 7.59 – 7.49 (m, 2H), 7.37 (d,  $J = 8.0$  Hz, 2H), 7.05 (d,  $J = 9.2$  Hz, 1H), 6.93 – 6.85 (m, 3H), 6.13 (dd,  $J = 15.6, 7.6$  Hz, 1H), 3.85 (s, 3H), 3.54 (t,  $J = 6.8$  Hz, 2H), 2.51 – 2.46 (m, 2H), 2.44 (s, 3H), 2.10 – 2.03 (m, 2H);

$^{13}\text{C}$  NMR (100 MHz,  $\text{CDCl}_3$ )  $\delta$  193.9, 164.1, 156.8, 147.5, 145.1, 134.4, 133.5, 133.4, 131.4, 130.7, 130.0, 128.6, 128.1, 127.6, 127.5, 127.0, 126.7, 126.3, 120.1, 114.7, 114.3, 92.0, 64.9, 55.7, 50.9, 29.3, 26.1, 21.6; IR (neat): 2929 (bs), 2235 (s), 1687, 1595, 1499, 1370, 1187, 1095, 951, 822, 717; HRESIMS Calcd for  $[\text{C}_{32}\text{H}_{29}\text{NNaO}_7\text{S}_2]^+$  ( $\text{M} + \text{Na}^+$ ) 626.1278, found 626.1286.

**(E)-1-(((4-methyl-N-(6-oxohex-4-en-1-yl)phenyl)sulfonamido)ethynyl)naphthalen-2-yl 4-(tert-butyl)benzenesulfonate (1i)**

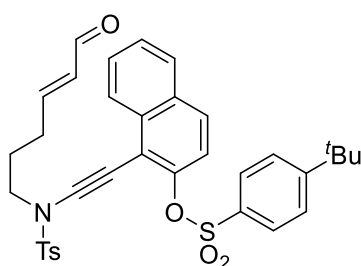

**1i**

Compound **1i** was prepared in 67% yield (424 mg) with  $E/Z > 20/1$  according to the general procedure as a pale yellow oil.  $^1\text{H}$  NMR (400 MHz,  $\text{CDCl}_3$ )  $\delta$  9.49 (d,  $J = 7.6$  Hz, 1H), 8.25 (d,  $J = 8.0$  Hz, 1H), 7.92 (d,  $J = 8.0$  Hz, 2H), 7.83 – 7.79 (m, 3H), 7.65 – 7.51 (m, 5H), 7.36 (d,  $J = 7.6$  Hz, 2H), 6.98 (d,  $J = 7.6$  Hz, 1H), 6.92 – 6.85 (m, 1H), 6.13 (dd,  $J = 15.6, 7.6$  Hz, 1H), 3.55 (t,  $J = 6.8$  Hz, 2H), 2.49 – 2.47 (m, 2H), 2.43 (s, 3H), 2.09 – 2.06 (m, 2H), 1.33 (s, 9H);  $^{13}\text{C}$  NMR (100 MHz,  $\text{CDCl}_3$ )  $\delta$  193.9, 158.4, 156.8, 147.4, 145.0, 134.5, 133.5, 133.4, 133.0, 131.4, 130.0, 128.6, 128.3, 128.1, 127.6, 126.7, 126.4, 126.2, 120.0, 114.9, 92.2, 65.0, 51.0, 35.3, 30.9, 29.3, 26.1, 21.6; IR (neat): 2966 (bs), 2234 (s), 1693, 1423, 1216, 1174, 1141, 948, 835, 616, 590; HRESIMS Calcd for  $[\text{C}_{35}\text{H}_{35}\text{NNaO}_6\text{S}_2]^+$  ( $\text{M} + \text{Na}^+$ ) 652.1798, found 652.1802.

**(E)-1-(((4-methyl-N-(6-oxohex-4-en-1-yl)phenyl)sulfonamido)ethynyl)naphthalen-2-yl 4-bromobenzenesulfonate (1j)**



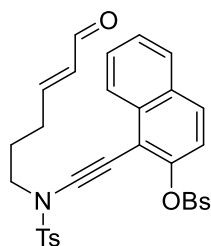

**1j**

Compound **1j** was prepared in 54% yield (350 mg) with *E/Z* > 20/1 according to the general procedure as a pale yellow oil. <sup>1</sup>H NMR (400 MHz, CDCl<sub>3</sub>) δ 9.50 (d, *J* = 7.6 Hz, 1H), 8.16 (d, *J* = 8.4 Hz, 1H), 7.92 (d, *J* = 8.4 Hz, 2H), 7.81 (d, *J* = 7.6 Hz, 1H), 7.74 – 7.67 (m, 3H), 7.62 – 7.50 (m, 4H), 7.38 (d, *J* = 8.0 Hz, 2H), 7.10 (d, *J* = 9.2 Hz, 1H), 6.91 – 6.84 (m, 1H), 6.17 – 6.11 (m, 1H), 3.53 (t, *J* = 6.8 Hz, 2H), 2.51 – 2.47 (m, 2H), 2.45 (s, 3H), 2.08 – 2.01 (m, 2H); <sup>13</sup>C NMR (100 MHz, CDCl<sub>3</sub>) δ 193.8, 156.6, 147.2, 145.1, 134.8, 134.3, 133.5, 132.4, 131.5, 130.1, 130.0, 129.6, 128.9, 128.2, 127.7, 127.6, 126.9, 126.2, 119.9, 114.6, 92.2, 64.7, 50.9, 29.2, 26.2, 21.6; IR (neat): 2965 (bs), 2237 (s), 1687, 1370, 1239, 1098, 962, 823, 525; HRESIMS Calcd for [C<sub>31</sub>H<sub>26</sub>BrNNaO<sub>6</sub>S<sub>2</sub>]<sup>+</sup> (M + Na<sup>+</sup>) 674.0277, found 674.0282.

**(E)-1-(((4-methyl-*N*-(6-oxohex-4-en-1-yl)phenyl)sulfonamido)ethynyl)naphthalen-2-yl 4-nitrobenzenesulfonate (1k)**

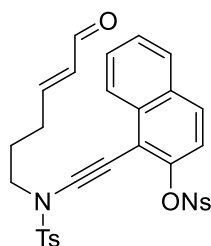

**1k**

Compound **1k** was prepared in 58% yield (359 mg) with *E/Z* > 20/1 according to the general procedure as a yellow solid (mp 145–147 °C). <sup>1</sup>H NMR (400 MHz, CDCl<sub>3</sub>) δ 9.50 (d, *J* = 7.6 Hz, 1H), 8.31 (d, *J* = 7.2 Hz, 2H), 8.10 (d, *J* = 8.4 Hz, 2H), 7.91 (d, *J* = 7.2 Hz, 2H), 7.83 (d, *J* = 8.0 Hz, 1H), 7.71 (d, *J* = 8.8 Hz, 1H), 7.64 – 7.52 (m, 3H), 7.39 (d, *J* = 7.6 Hz, 2H), 7.21 – 7.14 (m, 1H), 6.90 – 6.83 (m, 1H), 6.14 (dd, *J* = 15.6, 7.6 Hz, 1H), 3.54 (t, *J* = 6.4 Hz, 2H), 2.54 – 2.49 (m, 2H), 2.46 (s, 3H), 2.07 – 2.01 (m, 2H); <sup>13</sup>C NMR (100 MHz, CDCl<sub>3</sub>) δ 193.8, 156.2, 151.0, 146.9, 145.3, 141.2, 134.3,

133.5, 133.4, 131.6, 130.1, 130.0, 129.1, 128.3, 127.9, 127.6, 127.1, 126.2, 124.2, 119.8, 114.5, 92.6, 64.5, 51.0, 29.2, 26.2, 21.6; IR (neat): 2933 (bs), 2234 (s), 1687, 1548, 1366, 1170, 950, 737, 672, 587; HRESIMS Calcd for  $[C_{31}H_{26}N_2NaO_8S_2]^+$  ( $M + Na^+$ ) 641.1023, found 641.1025.

**(E)-1-(((4-methyl-N-(6-oxohex-4-en-1-yl)phenyl)sulfonamido)ethynyl)naphthalen-2-yl 2-nitrobenzenesulfonate (11)**

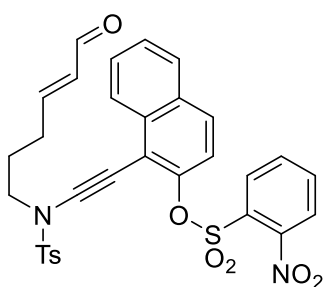

**11**

Compound **11** was prepared in 43% yield (266 mg) with  $E/Z = 9/1$  according to the general procedure as a pale yellow oil.  $^1H$  NMR (400 MHz,  $CDCl_3$ )  $\delta$  9.49 (d,  $J = 8.0$  Hz, 1H), 8.30 (d,  $J = 8.0$  Hz, 1H), 8.03 (d,  $J = 8.0$  Hz, 1H), 7.89 – 7.81 (m, 6H), 7.73 – 7.61 (m, 2H), 7.57 – 7.54 (m, 1H), 7.36 (d,  $J = 8.0$  Hz, 2H), 7.01 (d,  $J = 9.2$  Hz, 1H), 6.90 – 6.83 (m, 1H), 6.11 (dd,  $J = 15.6, 8.0$  Hz, 1H), 3.54 (t,  $J = 6.8$  Hz, 2H), 2.49 – 2.47 (m, 2H), 2.45 (s, 3H), 2.09 – 2.01 (m, 2H);  $^{13}C$  NMR (100 MHz,  $CDCl_3$ )  $\delta$  194.1, 156.9, 148.5, 147.01, 145.1, 135.4, 134.5, 133.7, 133.5, 132.3, 131.7(3), 131.7(0), 130.1, 129.5, 128.9, 128.2, 127.9, 127.6, 127.1, 126.6, 124.9, 119.8, 115.3, 92.8, 64.7, 51.0, 29.4, 26.2, 21.6; IR (neat): 2930 (bs), 2233 (s), 1687, 1534, 1351, 1206, 1169, 1091, 952, 742, 545; HRESIMS Calcd for  $[C_{31}H_{26}N_2NaO_8S_2]^+$  ( $M + Na^+$ ) 641.1023, found 641.1027.

**(E)-1-(((4-methyl-N-(6-oxohex-4-en-1-yl)phenyl)sulfonamido)ethynyl)naphthalen-2-yl naphthalene-1-sulfonate (1m)**

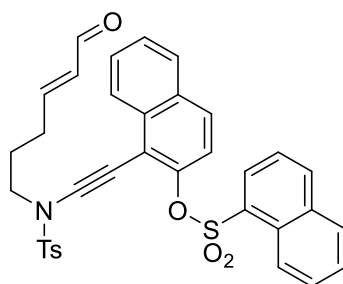

**1m**

Compound **1m** was prepared in 66% yield (412 mg) with  $E/Z = 19/1$  according to the general procedure as a pale yellow oil.  $^1\text{H}$  NMR (400 MHz,  $\text{CDCl}_3$ )  $\delta$  9.48 (d,  $J = 8.0$  Hz, 1H), 8.80 (d,  $J = 8.4$  Hz, 1H), 8.32 (d,  $J = 8.4$  Hz, 1H), 8.15 (d,  $J = 8.0$  Hz, 1H), 8.11 (d,  $J = 7.6$  Hz, 1H), 7.98 (d,  $J = 8.0$  Hz, 1H), 7.94 – 7.92 (m, 2H), 7.73 – 7.58 (m, 4H), 7.51 – 7.42 (m, 3H), 7.36 (d,  $J = 8.0$  Hz, 2H), 6.91 – 6.83 (m, 1H), 6.44 (d,  $J = 9.2$  Hz, 1H), 6.15 – 6.09 (m, 1H), 3.50 (t,  $J = 6.8$  Hz, 2H), 2.48 – 2.46 (m, 2H), 2.44 (s, 3H), 2.09 – 2.02 (m, 3H);  $^{13}\text{C}$  NMR (100 MHz,  $\text{CDCl}_3$ )  $\delta$  194.0, 157.1, 147.2, 145.0, 135.8, 134.5, 134.1, 133.6, 133.4, 131.9, 131.4, 130.8, 130.0, 129.0, 128.9, 128.5, 128.3, 128.0, 127.7, 127.6, 127.4, 126.8, 126.5, 125.1, 124.0, 119.4, 115.3, 92.4, 65.2, 50.9, 29.4, 26.0, 21.6; IR (neat): 2923(bs), 2229(s), 1688, 1361, 1169, 825, 736, 570; HRESIMS Calcd for  $[\text{C}_{35}\text{H}_{29}\text{NNaO}_6\text{S}_2]^+$  ( $M + \text{Na}^+$ ) 646.1329, found 646.1320.

**(E)-1-(((4-methyl-N-(6-oxohex-4-en-1-yl)phenyl)sulfonamido)ethynyl)naphthalen-2-yl methanesulfonate (1n)**

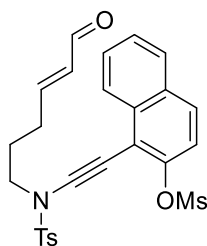

**1n**

Compound **1n** was prepared in 80% yield (412 mg) with  $E/Z > 20/1$  according to the general procedure as a yellow oil.  $^1\text{H}$  NMR (400 MHz,  $\text{CDCl}_3$ )  $\delta$  9.49 (d,  $J = 8.0$  Hz, 1H), 8.13 (d,  $J = 8.0$  Hz, 1H), 7.92 (d,  $J = 8.0$  Hz, 2H), 7.85 (d,  $J = 8.0$  Hz, 1H), 7.80 (d,  $J = 9.2$  Hz, 1H), 7.60 – 7.51 (m, 3H), 7.36 (d,  $J = 8.0$  Hz, 2H), 6.89 – 6.82 (m, 1H), 6.14 (dd,  $J = 15.6, 7.6$  Hz, 1H), 3.58 (t,  $J = 6.8$  Hz, 2H), 3.26 (s, 3H), 2.52 – 2.48 (m,

2H), 2.42 (s, 3H), 2.10 – 2.03 (m, 2H);  $^{13}\text{C}$  NMR (100 MHz,  $\text{CDCl}_3$ )  $\delta$  193.7, 156.3, 147.3, 145.2, 134.0, 133.4, 133.1, 131.5, 130.0, 129.2, 128.3, 127.7, 127.5, 126.8, 125.8, 121.0, 113.5, 92.2, 64.7, 50.8, 37.8, 29.1, 26.1, 21.5; IR (neat): 2937 (bs), 2234 (s), 1683, 1367, 1172, 949, 818, 588; HRESIMS Calcd for  $[\text{C}_{26}\text{H}_{25}\text{NNaO}_6\text{S}_2]^+$  ( $\text{M} + \text{Na}^+$ ) 534.1016, found 534.1022.

**(E)-1-(((4-methyl-N-(6-oxohex-4-en-1-yl)phenyl)sulfonamido)ethynyl)naphthalen-2-yl-trifluoromethanesulfonate (1o)**

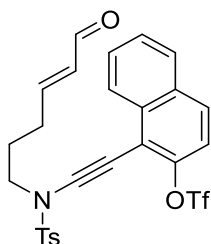

**1o**

Compound **1o** was prepared in 67% yield (382 mg) with  $E/Z = 7/1$  according to the general procedure as a pale yellow oil.  $^1\text{H}$  NMR (400 MHz,  $\text{CDCl}_3$ )  $\delta$  9.50 (d,  $J = 8.0$  Hz, 1H), 8.37 (d,  $J = 8.0$  Hz, 1H), 7.90 – 7.84 (m, 3H), 7.82 (d,  $J = 9.2$  Hz, 1H), 7.71 – 7.67 (m, 1H), 7.63 – 7.59 (m, 1H), 7.35 (d,  $J = 8.0$  Hz, 2H), 7.32 (d,  $J = 9.2$  Hz, 1H), 6.88 – 6.81 (m, 1H), 6.16 – 6.10 (m, 1H), 3.57 (t,  $J = 7.2$  Hz, 2H), 2.51 – 2.42 (m, 2H), 2.44 (s, 3H), 2.08 – 2.01 (m, 2H);  $^{13}\text{C}$  NMR (100 MHz,  $\text{CDCl}_3$ )  $\delta$  193.8, 156.4, 147.0, 145.2, 134.4, 133.5, 132.0, 130.8, 130.0, 129.5, 128.4, 128.2, 127.6, 127.5, 126.7, 118.8, 118.6 (q,  $J = 320.7$  Hz), 115.2, 93.9, 63.8, 51.0, 29.2, 26.3, 21.6;  $^{19}\text{F}$  NMR (376 MHz,  $\text{CDCl}_3$ )  $\delta$  -73.7; IR (neat): 3015 (bs), 2234 (s), 1689, 1422, 1215, 948, 834, 614, 545; HRESIMS Calcd for  $[\text{C}_{26}\text{H}_{22}\text{F}_3\text{NNaO}_6\text{S}_2]^+$  ( $\text{M} + \text{Na}^+$ ) 588.0733, found 588.0730.

**(E)-1-(((4-methyl-N-(6-oxohex-4-en-1-yl)phenyl)sulfonamido)ethynyl)-3-phenylnaphthalen-2-yl 2,4,6-trimethylbenzenesulfonate (1p)**

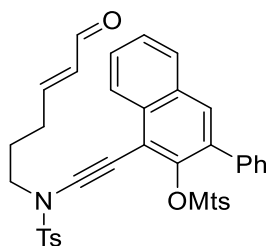

**1p**

Compound **1p** was prepared in 83% yield (574 mg) with  $E/Z = 14/1$  according to the general procedure as a pale yellow oil.  $^1\text{H NMR}$  (400 MHz,  $\text{CDCl}_3$ )  $\delta$  9.47 (d,  $J = 8.0$  Hz, 1H), 8.44 (d,  $J = 8.0$  Hz, 1H), 7.94 (d,  $J = 8.4$  Hz, 2H), 7.79 (d,  $J = 8.0$  Hz, 1H), 7.65 – 7.51 (m, 3H), 7.34 (d,  $J = 8.0$  Hz, 2H), 7.15 – 7.13 (m, 2H), 7.02 – 6.97 (m, 3H), 6.93 – 6.86 (m, 1H), 6.57 (s, 2H), 6.17 – 6.10 (m, 1H), 3.63 (t,  $J = 7.2$  Hz, 2H), 2.53 – 2.47 (m, 2H), 2.42 (s, 3H), 2.24 (s, 6H), 2.19 (s, 3H), 2.17 – 2.13 (m, 2H);  $^{13}\text{C NMR}$  (100 MHz,  $\text{CDCl}_3$ )  $\delta$  194.0, 157.5, 145.5, 144.8, 142.7, 138.9, 136.8, 134.8, 134.3, 133.3, 133.0, 132.7, 131.8, 131.5, 129.9, 129.7, 128.5, 127.9, 127.6, 127.5, 127.0, 126.9, 126.7, 117.7, 92.4, 66.0, 51.1, 29.4, 26.3, 22.8, 21.6, 20.8; IR (neat): 2967 (bs), 2235 (s), 1687, 1637, 1367, 1187, 970, 845, 813; HRESIMS Calcd for  $[\text{C}_{40}\text{H}_{37}\text{NNaO}_6\text{S}_2]^+$  ( $\text{M} + \text{Na}^+$ ) 714.1955, found 714.1952.

**(E)-3-methoxy-1-(((4-methyl-N-(6-oxohex-4-en-1-yl)phenyl)sulfonamido)ethynyl)naphthalen-2-yl 2,4,6-trimethylbenzenesulfonate (1q)**

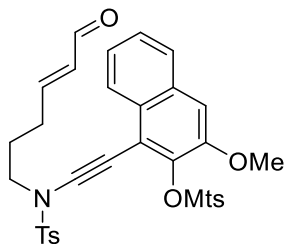

**1q**

Compound **1q** was prepared in 45% yield (289 mg) with  $E/Z = 4/1$  according to the general procedure as a pale yellow oil.  $^1\text{H NMR}$  (400 MHz,  $\text{CDCl}_3$ )  $\delta$  9.49 (d,  $J = 8.0$  Hz, 1H), 8.29 – 8.25 (m, 1H), 7.92 – 7.89 (m, 2H), 7.68 – 7.65 (m, 1H), 7.50 – 7.46 (m, 2H), 7.35 (d,  $J = 8.0$  Hz, 2H), 7.00 – 6.87 (m, 4H), 6.13 (dd,  $J = 15.6, 7.6$  Hz, 1H), 3.56 (t,  $J = 7.2$  Hz, 2H), 3.37 (s, 3H), 2.55 (s, 6H), 2.52 – 2.46 (m, 2H), 2.44 (s, 3H), 2.33 (s,

3H), 2.18 – 2.10 (m, 2H);  $^{13}\text{C}$  NMR (100 MHz,  $\text{CDCl}_3$ )  $\delta$  194.1, 157.4, 150.2, 145.0, 142.9, 139.7, 139.5, 134.7, 134.1, 133.3, 132.2, 131.2, 130.0, 128.4, 127.6, 127.1, 126.6, 126.5, 125.2, 117.7, 106.7, 92.4, 65.4, 55.1, 51.1, 29.4, 26.2, 22.7, 21.6, 21.0; IR (neat): 2926 (bs), 2235 (s), 1627, 1360, 1168, 794, 741, 683; HRESIMS Calcd for  $[\text{C}_{35}\text{H}_{35}\text{NNaO}_7\text{S}_2]^+$  ( $\text{M} + \text{Na}^+$ ) 668.1747, found 668.1754.

**(E)-6-bromo-1-(((4-methyl-N-(6-oxohex-4-en-1-yl)phenyl)sulfonamido)ethynyl)naphthalen-2-yl 2,4,6-trimethylbenzenesulfonate (1r)**

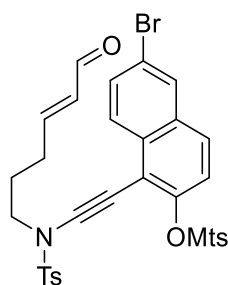

**1r**

Compound **1r** was prepared in 50% yield (347 mg) with  $E/Z = 16/1$  according to the general procedure as a pale yellow oil.  $^1\text{H}$  NMR (400 MHz,  $\text{CDCl}_3$ )  $\delta$  9.49 (d,  $J = 8.0$  Hz, 1H), 8.21 (d,  $J = 9.2$  Hz, 1H), 7.92 – 7.88 (m, 3H), 7.67 (dd,  $J = 8.8, 2.0$  Hz, 1H), 7.44 (d,  $J = 9.2$  Hz, 1H), 7.35 (d,  $J = 8.0$  Hz, 2H), 6.99 (s, 2H), 6.93 – 6.86 (m, 1H), 6.61 (d,  $J = 9.2$  Hz, 1H), 6.16 – 6.09 (m, 1H), 3.55 (t,  $J = 7.2$  Hz, 2H), 2.53 (s, 6H), 2.50 – 2.47 (m, 2H), 2.44 (s, 3H), 2.34 (s, 3H), 2.13 – 2.06 (m, 2H);  $^{13}\text{C}$  NMR (100 MHz,  $\text{CDCl}_3$ )  $\delta$  193.9, 157.0, 147.3, 145.1, 144.0, 140.1, 134.5, 133.4, 132.3, 132.1, 131.9, 131.6, 130.9, 130.0, 129.9, 128.4, 127.5, 127.3, 120.9, 120.3, 115.8, 92.7, 65.1, 50.9, 29.3, 26.0, 22.7, 21.6, 21.1; IR (neat): 2941 (bs), 2235 (s), 1694, 1597, 1367, 1169, 1091, 972, 819, 672; HRESIMS Calcd for  $[\text{C}_{34}\text{H}_{32}\text{BrNNaO}_6\text{S}_2]^+$  ( $\text{M} + \text{Na}^+$ ) 716.0747, found 716.0748.

**(E)-1-(((4-methyl-N-(6-oxohex-4-en-1-yl)phenyl)sulfonamido)ethynyl)-6-phenylnaphthalen-2-yl 2,4,6-trimethylbenzenesulfonate (1s)**

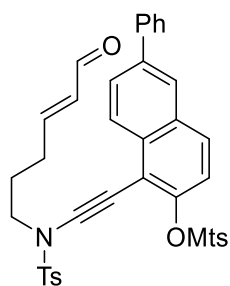

**1s**

Compound **1s** was prepared in 58% yield (402 mg) with  $E/Z = 17/1$  according to the general procedure as a pale yellow oil.  $^1\text{H NMR}$  (400 MHz,  $\text{CDCl}_3$ )  $\delta$  9.50 (d,  $J = 7.6$  Hz, 1H), 8.42 (d,  $J = 8.8$  Hz, 1H), 7.96 – 7.90 (m, 4H), 7.70 (d,  $J = 7.6$  Hz, 2H), 7.59 (d,  $J = 8.8$  Hz, 1H), 7.50 – 7.47 (m, 2H), 7.41 – 7.35 (m, 3H), 7.00 (s, 2H), 6.95 – 6.87 (m, 1H), 6.61 (d,  $J = 8.8$  Hz, 1H), 6.14 (dd,  $J = 15.6, 7.6$  Hz, 1H), 3.56 (t,  $J = 6.8$  Hz, 2H), 2.55 (s, 6H), 2.52 – 2.47 (m, 2H), 2.44 (s, 3H), 2.35 (s, 3H), 2.19 – 2.04 (m, 2H);  $^{13}\text{C NMR}$  (100 MHz,  $\text{CDCl}_3$ )  $\delta$  194.0, 157.2, 147.2, 145.0, 143.9, 140.3, 140.1, 139.4, 134.6, 133.4, 132.8, 131.9, 131.6, 130.0, 128.9, 128.6, 127.7, 127.6, 127.3(4), 127.3(0), 127.2, 125.7, 119.6, 115.4, 92.2, 65.4, 50.9, 29.4, 26.1, 22.7, 21.6, 21.1; IR (neat): 3024 (bs), 2236 (s), 1683, 1597, 1167, 1090, 950, 890, 766; HRESIMS Calcd for  $[\text{C}_{40}\text{H}_{37}\text{NNaO}_6\text{S}_2]^+$  ( $\text{M} + \text{Na}^+$ ) 714.1955, found 714.1954.

**(E)-6-methyl-1-(((4-methyl-N-(6-oxohex-4-en-1-yl)phenyl)sulfonamido)ethynyl)naphthalen-2-yl 2,4,6-trimethylbenzenesulfonate (1t)**

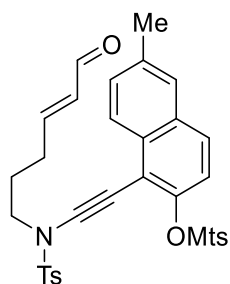

**1t**

Compound **1t** was prepared in 55% yield (345 mg) with  $E/Z > 20/1$  according to the general procedure as a pale yellow oil.  $^1\text{H NMR}$  (400 MHz,  $\text{CDCl}_3$ )  $\delta$  9.49 (d,  $J = 8.0$  Hz, 1H), 8.23 (d,  $J = 8.4$  Hz, 1H), 7.93 – 7.88 (m, 2H), 7.53 (s, 1H), 7.46 – 7.44 (m,

2H), 7.35 (d,  $J = 8.0$  Hz, 2H), 6.99 (s, 2H), 6.94 – 6.87 (m, 1H), 6.54 (d,  $J = 9.2$  Hz, 1H), 6.17 – 6.10 (m, 1H), 3.55 (t,  $J = 7.2$  Hz, 2H), 2.53 (s, 6H), 2.50 (s, 3H), 2.54 – 2.46 (m, 2H), 2.44 (s, 3H), 2.35 (s, 3H), 2.14 – 2.07 (m, 2H);  $^{13}\text{C}$  NMR (100 MHz,  $\text{CDCl}_3$ )  $\delta$  194.1, 157.2, 146.7, 144.9, 143.8, 140.2, 136.6, 134.6, 133.4, 131.8, 131.6, 130.0, 129.9, 127.8, 127.6, 127.0, 126.4, 119.1, 115.2, 91.9, 65.5, 51.0, 29.4, 26.1, 22.7, 21.6, 21.5, 21.1; IR (neat): 2940 (bs), 2236 (s), 1688, 1596, 1366, 1169, 893, 737, 546; HRESIMS Calcd for  $[\text{C}_{35}\text{H}_{35}\text{NNaO}_6\text{S}_2]^+$  ( $\text{M} + \text{Na}^+$ ) 652.1798, found 652.1805.

**(*E*)-6-methoxy-1-(((4-methyl-*N*-(6-oxohex-4-en-1-yl)phenyl)sulfonamido)ethynyl)naphthalen-2-yl 2,4,6-trimethylbenzenesulfonate (1u)**

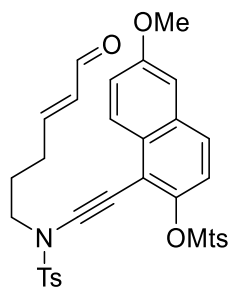

**1u**

Compound **1u** was prepared in 57% yield (370 mg) with  $E/Z = 11/1$  according to the general procedure as a pale yellow oil.  $^1\text{H}$  NMR (400 MHz,  $\text{CDCl}_3$ )  $\delta$  9.49 (d,  $J = 8.0$  Hz, 1H), 8.22 (d,  $J = 9.2$  Hz, 1H), 7.90 (d,  $J = 8.0$  Hz, 2H), 7.42 (d,  $J = 9.2$  Hz, 1H), 7.35 (d,  $J = 8.0$  Hz, 2H), 7.28 (d,  $J = 2.4$  Hz, 1H), 7.05 (d,  $J = 2.4$  Hz, 1H), 6.99 (s, 2H), 6.94 – 6.87 (m, 1H), 6.53 (d,  $J = 9.2$  Hz, 1H), 6.13 (dd,  $J = 15.6, 8.0$  Hz, 1H), 3.90 (s, 3H), 3.55 (t,  $J = 6.8$  Hz, 2H), 2.53 (s, 6H), 2.51 – 2.46 (m, 2H), 2.44 (s, 3H), 2.35 (s, 3H), 2.20 – 2.04 (m, 2H);  $^{13}\text{C}$  NMR (100 MHz,  $\text{CDCl}_3$ )  $\delta$  194.1, 158.2, 157.2, 145.7, 144.9, 143.8, 140.1, 134.6, 133.4, 132.7, 131.8, 130.0, 128.9, 128.1, 127.6, 127.0, 120.3, 119.6, 115.4, 106.0, 91.8, 65.5, 55.3, 50.9, 29.4, 26.0, 22.7, 21.6, 21.1; IR (neat): 2944 (bs), 2236 (s), 1688, 1593, 1366, 1166, 897, 772, 552; HRESIMS Calcd for  $[\text{C}_{35}\text{H}_{35}\text{NNaO}_7\text{S}_2]^+$  ( $\text{M} + \text{Na}^+$ ) 668.1747, found 668.1743.

**(*E*)-7-bromo-1-(((4-methyl-*N*-(6-oxohex-4-en-1-**



**yl)phenyl)sulfonamido)ethynyl)naphthalen-2-yl 2,4,6-trimethylbenzenesulfonate  
(1v)**

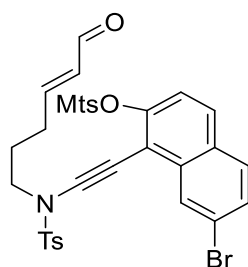

**1v**

Compound **1v** was prepared in 52% yield (360 mg) with  $E/Z > 20/1$  according to the general procedure as a pale yellow oil.  $^1\text{H NMR}$  (400 MHz,  $\text{CDCl}_3$ )  $\delta$  9.50 (d,  $J = 8.0$  Hz, 1H), 8.47 (d,  $J = 1.6$  Hz, 1H), 7.93 (d,  $J = 8.4$  Hz, 2H), 7.63 (d,  $J = 8.8$  Hz, 1H), 7.57 (dd,  $J = 8.8, 2.0$  Hz, 1H), 7.51 (d,  $J = 8.8$  Hz, 1H), 7.41 (d,  $J = 8.0$  Hz, 2H), 7.00 (s, 2H), 6.95 – 6.87 (m, 1H), 6.63 (d,  $J = 9.2$  Hz, 1H), 6.17 – 6.11 (m, 1H), 3.58 (t,  $J = 7.0$  Hz, 2H), 2.54 (s, 6H), 2.59 – 2.47 (m, 2H), 2.45 (s, 3H), 2.35 (s, 3H), 2.14 – 2.07 (m, 2H);  $^{13}\text{C NMR}$  (100 MHz,  $\text{CDCl}_3$ )  $\delta$  194.0, 157.1, 148.0, 145.1, 144.1, 140.1, 134.7, 134.4, 133.4, 131.9, 131.6, 130.1, 130.0, 129.7, 129.6, 128.8, 128.4, 127.5, 122.2, 119.7, 114.7, 92.6, 64.8, 51.0, 29.4, 26.1, 22.7, 21.7, 21.1; IR (neat): 2940 (bs), 2235 (s), 1690, 1598, 1367, 1171, 1090, 951, 819, 672; HRESIMS Calcd for  $[\text{C}_{34}\text{H}_{32}\text{BrNNaO}_6\text{S}_2]^+$  ( $\text{M} + \text{Na}^+$ ) 716.0747, found 716.0741.

**(E)-1-(((4-methyl-N-(6-oxohex-4-en-1-yl)phenyl)sulfonamido)ethynyl)-7-phenylnaphthalen-2-yl 2,4,6-trimethylbenzenesulfonate (1w)**

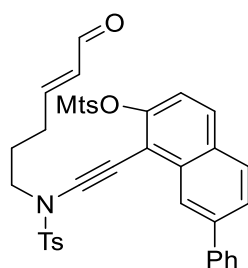

**1w**

Compound **1w** was prepared in 66% yield (458 mg) with  $E/Z > 20/1$  according to the general procedure as a pale yellow oil.  $^1\text{H NMR}$  (400 MHz,  $\text{CDCl}_3$ )  $\delta$  9.46 (d,  $J = 7.6$

Hz, 1H), 8.66 (s, 1H), 7.88 – 7.79 (m, 6H), 7.57 – 7.48 (m, 3H), 7.41 – 7.38 (m, 1H), 7.21 (d,  $J = 7.6$  Hz, 2H), 7.00 (s, 2H), 6.91 – 6.84 (m, 1H), 6.59 (d,  $J = 8.8$  Hz, 1H), 6.11 (dd,  $J = 15.6, 7.6$  Hz, 1H), 3.55 (t,  $J = 6.8$  Hz, 2H), 2.56 (s, 6H), 2.51 – 2.45 (m, 2H), 2.36 (s, 3H), 2.35 (s, 3H), 2.13 – 2.09 (m, 2H);  $^{13}\text{C}$  NMR (100 MHz,  $\text{CDCl}_3$ )  $\delta$  194.1, 157.2, 147.6, 144.9, 143.9, 140.3, 140.2, 134.6, 134.0, 133.4, 131.9, 130.5, 130.0, 129.0, 128.6, 128.1, 127.8, 127.4(9), 127.4(6), 126.2, 124.4, 119.1, 115.7, 92.6, 65.6, 50.9, 29.4, 26.1, 22.8, 21.6, 21.1; IR (neat): 2941 (bs), 2235 (s), 1682, 1361, 1170, 1091, 950, 732; HRESIMS Calcd for  $[\text{C}_{40}\text{H}_{37}\text{NNaO}_6\text{S}_2]^+$  ( $\text{M} + \text{Na}^+$ ) 714.1955, found 714.1952.

**(*E*)-7-methyl-1-(((4-methyl-*N*-(6-oxohex-4-en-1-yl)phenyl)sulfonamido)ethynyl)naphthalen-2-yl 2,4,6-trimethylbenzenesulfonate (1x)**

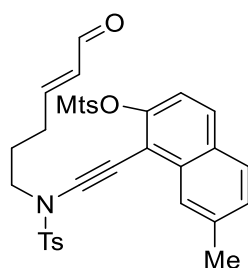

**1x**

Compound **1x** was prepared in 55% yield (344 mg) with  $E/Z > 20/1$  according to the general procedure as a pale yellow oil.  $^1\text{H}$  NMR (400 MHz,  $\text{CDCl}_3$ )  $\delta$  9.49 (d,  $J = 8.0$  Hz, 1H), 8.16 (d,  $J = 0.8$  Hz, 1H), 7.93 – 7.90 (m, 2H), 7.66 (d,  $J = 9.2$  Hz, 1H), 7.49 (d,  $J = 8.8$  Hz, 1H), 7.37 – 7.32 (m, 3H), 6.98 (s, 2H), 6.94 – 6.87 (m, 1H), 6.52 (d,  $J = 8.8$  Hz, 1H), 6.12 (dd,  $J = 15.6, 8.0$  Hz, 1H), 3.56 (t,  $J = 6.8$  Hz, 2H), 2.57 (s, 3H), 2.53 (s, 6H), 2.50 – 2.46 (m, 2H), 2.43 (s, 3H), 2.34 (s, 3H), 2.14 – 2.07 (m, 2H);  $^{13}\text{C}$  NMR (100 MHz,  $\text{CDCl}_3$ )  $\delta$  194.0, 157.2, 147.5, 144.9, 143.8, 140.1, 137.7, 134.7, 133.9, 133.4, 131.9, 131.8, 130.0, 129.6, 128.9, 128.2, 127.8, 127.5, 125.7, 118.1, 114.6, 92.0, 65.4, 50.9, 29.4, 26.1, 22.7, 22.0, 21.6, 21.1; IR (neat): 2931 (bs), 2224 (s), 1691, 1421, 1214, 1170, 1140, 937, 765, 750; HRESIMS Calcd for  $[\text{C}_{35}\text{H}_{35}\text{NNaO}_6\text{S}_2]^+$  ( $\text{M} + \text{Na}^+$ ) 652.1798, found 652.1793.

**(E)-7-methoxy-1-(((4-methyl-N-(6-oxohex-4-en-1-yl)phenyl)sulfonamido)ethynyl)naphthalen-2-yl 2,4,6-trimethylbenzenesulfonate (1y)**

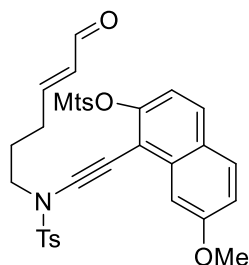

**1y**

Compound **1y** was prepared in 46% yield (297 mg) with *E/Z* > 20/1 according to the general procedure as a pale yellow oil. <sup>1</sup>H NMR (400 MHz, CDCl<sub>3</sub>) δ 9.49 (d, *J* = 8.0 Hz, 1H), 7.91 – 7.87 (m, 3H), 7.66 (d, *J* = 8.8 Hz, 1H), 7.45 (d, *J* = 8.8 Hz, 1H), 7.33 (d, *J* = 8.0 Hz, 2H), 7.17 (dd, *J* = 8.8, 2.4 Hz, 1H), 6.99 (s, 2H), 6.95 – 6.87 (m, 1H), 6.39 (d, *J* = 8.8 Hz, 1H), 6.12 (dd, *J* = 15.6, 8.0 Hz, 1H), 4.03 (s, 3H), 3.50 (t, *J* = 6.8 Hz, 2H), 2.53 (s, 6H), 2.51 – 2.46 (m, 2H), 2.42 (s, 3H), 2.34 (s, 3H), 2.15 – 2.08 (m, 2H); <sup>13</sup>C NMR (100 MHz, CDCl<sub>3</sub>) δ 194.0, 159.4, 157.2, 147.2, 145.0, 143.8, 140.1, 135.4, 134.6, 133.4, 131.8, 130.0, 129.4, 127.9, 127.3, 126.7, 119.9, 116.4, 114.3, 104.7, 92.1, 66.1, 55.8, 50.6, 29.4, 25.9, 22.7, 21.6, 21.1; IR (neat): 2940 (bs), 2236 (s), 1630, 1361, 1221, 1168, 955, 783, 742, 582; HRESIMS Calcd for [C<sub>35</sub>H<sub>35</sub>NNaO<sub>7</sub>S<sub>2</sub>]<sup>+</sup> (M + Na<sup>+</sup>) 668.1747, found 668.1744.

**(E)-1-(((4-methyl-N-(6-oxohex-4-en-1-yl)phenyl)sulfonamido)ethynyl)-5,6,7,8-tetrahydronaphthalen-2-yl 2,4,6-trimethylbenzenesulfonate (1z)**

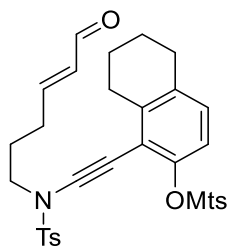

**1z**

Compound **1z** was prepared in 47% yield (289 mg) with *E/Z* = 11/1 according to the

general procedure as a pale yellow oil.  $^1\text{H}$  NMR (400 MHz,  $\text{CDCl}_3$ )  $\delta$  9.49 (d,  $J = 8.0$  Hz, 1H), 7.87 (d,  $J = 8.4$  Hz, 2H), 7.36 (d,  $J = 8.0$  Hz, 2H), 6.98 (s, 2H), 6.94 – 6.86 (m, 1H), 6.74 (d,  $J = 8.4$  Hz, 1H), 6.17 – 6.09 (m, 2H), 3.51 (t,  $J = 7.2$  Hz, 2H), 2.83 (t,  $J = 6.0$  Hz, 2H), 2.66 (t,  $J = 6.0$  Hz, 2H), 2.54 (s, 6H), 2.49 – 2.42 (m, 1H), 2.45 (s, 3H), 2.33 (s, 3H), 2.07 – 2.02 (m, 2H), 1.84 – 1.72 (m, 5H);  $^{13}\text{C}$  NMR (100 MHz,  $\text{CDCl}_3$ )  $\delta$  194.0, 157.4, 147.2, 144.8, 143.6, 140.4, 140.0, 135.9, 134.6, 133.3, 131.9, 131.7, 129.9, 128.4, 127.5, 118.1, 117.1, 91.5, 65.4, 51.0, 29.4, 29.2, 28.4, 26.0, 22.6, 22.5, 22.4, 21.6, 21.0; IR (neat): 2943 (bs), 2235 (s), 1688, 1371, 1269, 1095, 951, 757, 559; HRESIMS Calcd for  $[\text{C}_{34}\text{H}_{37}\text{NNaO}_6\text{S}_2]^+$  ( $\text{M} + \text{Na}^+$ ) 642.1955, found 642.1959.

**(*E*)-1-(((4-(*tert*-butyl)-*N*-(6-oxohex-4-en-1-yl)phenyl)sulfonamido)ethynyl)naphthalen-2-yl trifluoromethanesulfonate (1aa)**

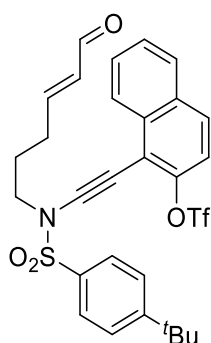

**1aa**

Compound **1aa** was prepared in 67% yield (405 mg) with  $E/Z = 18/1$  according to the general procedure as a pale yellow oil.  $^1\text{H}$  NMR (400 MHz,  $\text{CDCl}_3$ )  $\delta$  9.50 (d,  $J = 7.6$  Hz, 1H), 8.40 (d,  $J = 8.4$  Hz, 1H), 7.93 – 7.86 (m, 3H), 7.82 (d,  $J = 9.2$  Hz, 1H), 7.71 – 7.67 (m, 1H), 7.62 – 7.55 (m, 3H), 7.32 (d,  $J = 9.2$  Hz, 1H), 6.88 – 6.81 (m, 1H), 6.14 (dd,  $J = 15.6, 7.6$  Hz, 1H), 3.59 (t,  $J = 7.2$  Hz, 2H), 2.51 – 2.45 (m, 2H), 2.15 – 1.99 (m, 2H), 1.33 (s, 9H);  $^{13}\text{C}$  NMR (100 MHz,  $\text{CDCl}_3$ )  $\delta$  193.8, 158.1, 156.5, 147.1, 134.3, 133.6, 133.5, 132.0, 129.5, 128.4, 128.2, 127.6, 127.4, 126.7, 126.4, 118.8, 118.6 (q,  $J = 320.4$  Hz), 115.2, 94.0, 63.8, 51.0, 35.3, 30.9, 29.2, 26.3;  $^{19}\text{F}$  NMR (376 MHz,  $\text{CDCl}_3$ )  $\delta$  -73.7; IR (neat): 2966 (bs), 2234 (s), 1693, 1175, 1140, 948, 835, 523; HRESIMS Calcd for  $[\text{C}_{29}\text{H}_{28}\text{F}_3\text{NNaO}_6\text{S}_2]^+$  ( $\text{M} + \text{Na}^+$ ) 630.1202, found 630.1206.

**(E)-1-(((4-nitro-N-(6-oxohex-4-en-1-yl)phenyl)sulfonamido)ethynyl)naphthalen-2-yl trifluoromethanesulfonate (1ab)**

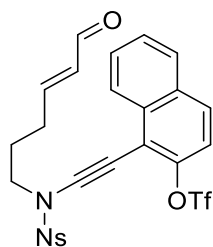

**1ab**

Compound **1ab** was prepared in 61% yield (362 mg) with *E/Z* > 20/1 according to the general procedure as a pale yellow oil. <sup>1</sup>H NMR (400 MHz, CDCl<sub>3</sub>) δ 9.51 (d, *J* = 7.6 Hz, 1H), 8.38 (d, *J* = 8.8 Hz, 2H), 8.32 (d, *J* = 8.4 Hz, 1H), 8.17 (d, *J* = 8.8 Hz, 2H), 7.91 – 7.87 (m, 2H), 7.73 – 7.60 (m, 2H), 7.32 (d, *J* = 9.2 Hz, 1H), 6.89 – 6.82 (m, 1H), 6.16 (dd, *J* = 15.6, 7.6 Hz, 1H), 3.64 (t, *J* = 7.2 Hz, 2H), 2.55 – 2.48 (m, 2H), 2.12 – 2.05 (m, 2H); <sup>13</sup>C NMR (100 MHz, CDCl<sub>3</sub>) δ 193.6, 155.8, 150.8, 147.7, 142.5, 133.6, 133.5, 132.0, 130.4, 128.8, 128.6, 128.4, 127.7, 126.3, 124.6, 118.8, 118.5 (q, *J* = 320.6 Hz), 114.4, 92.2, 64.0, 51.4, 29.1, 26.3; <sup>19</sup>F NMR (376 MHz, CDCl<sub>3</sub>) δ -73.9; IR (neat): 2925 (bs), 2235 (s), 1689, 1598, 1373, 1175, 1093, 962, 819, 650; HRESIMS Calcd for [C<sub>25</sub>H<sub>19</sub>F<sub>3</sub>N<sub>2</sub>NaO<sub>8</sub>S<sub>2</sub>]<sup>+</sup> (M + Na<sup>+</sup>) 619.0427, found 619.0429.

**(E)-8-methyl-1-(((4-methyl-N-(6-oxohex-4-en-1-yl)phenyl)sulfonamido)ethynyl)naphthalen-2-yl-trifluoromethanesulfonate (1ac)**

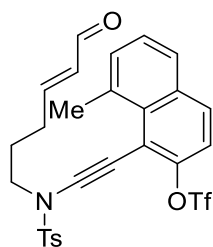

**1ac**

Compound **1ac** was prepared in 57% yield (322 mg) with *E/Z* > 20/1 according to the general procedure as a pale yellow oil. <sup>1</sup>H NMR (400 MHz, CDCl<sub>3</sub>) δ 9.49 (d, *J* = 7.6 Hz, 1H), 7.84 – 7.79 (m, 3H), 7.70 (d, *J* = 7.6 Hz, 1H), 7.45 – 7.26 (m, 5H), 6.88 – 6.80 (m, 1H), 6.13 (dd, *J* = 15.6, 7.6 Hz, 1H), 3.57 (t, *J* = 6.8 Hz, 2H), 3.15 (s, 3H), 2.50 – 2.47 (m, 2H), 2.43 (s, 3H), 2.04 – 2.00 (m, 2H); <sup>13</sup>C NMR (100 MHz, CDCl<sub>3</sub>) δ 193.8,

156.6, 150.0, 145.0, 137.0, 134.6, 133.5, 132.7, 131.1, 130.9, 130.0, 127.5, 127.3, 127.2, 118.5 (q,  $J = 319.8$  Hz), 118.2, 114.5, 94.5, 66.4, 50.8, 29.2, 26.4, 24.1, 21.6;  $^{19}\text{F}$  NMR (376 MHz,  $\text{CDCl}_3$ )  $\delta$  -73.9; IR (neat): 2931 (bs), 2224 (s), 1691, 1421, 1214, 1140, 937, 765, 750, 546; HRESIMS Calcd for  $[\text{C}_{27}\text{H}_{24}\text{F}_3\text{NNaO}_6\text{S}_2]^+$  ( $\text{M} + \text{Na}^+$ ) 602.0889, found 602.0896.

**(E)-1-(((4-methyl-N-(6-oxohex-4-en-1-yl)phenyl)sulfonamido)ethynyl)-8-phenylnaphthalen-2-yl trifluoromethanesulfonate (1ad)**

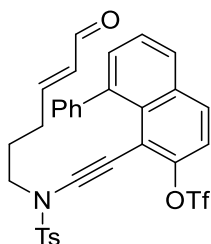

**1ad**

Compound **1ad** was prepared in 47% yield (299 mg) with  $E/Z = 13/1$  according to the general procedure as a pale yellow oil.  $^1\text{H}$  NMR (400 MHz,  $\text{CDCl}_3$ )  $\delta$  9.47 (d,  $J = 8.0$  Hz, 1H), 7.97 (d,  $J = 8.8$  Hz, 1H), 7.90 (d,  $J = 8.0$  Hz, 1H), 7.68 (d,  $J = 8.0$  Hz, 2H), 7.59 – 7.55 (m, 1H), 7.41 – 7.39 (m, 2H), 7.33 – 7.28 (m, 5H), 7.17 – 7.14 (m, 2H), 6.78 – 6.70 (m, 1H), 6.06 (dd,  $J = 15.6, 7.6$  Hz, 1H), 2.92 (t,  $J = 6.8$  Hz, 2H), 2.46 (s, 3H), 2.29 – 2.23 (m, 2H), 1.59 – 1.53 (m, 2H);  $^{13}\text{C}$  NMR (100 MHz,  $\text{CDCl}_3$ )  $\delta$  193.8, 156.8, 151.8, 144.6, 142.2, 141.2, 134.9, 133.4, 133.3, 132.1, 131.4, 129.8, 129.7, 128.5, 127.8, 127.3, 126.7, 126.5, 119.0, 118.6 (q,  $J = 322.1$  Hz), 114.8, 110.0, 96.8, 63.6, 50.4, 29.0, 25.9, 21.6;  $^{19}\text{F}$  NMR (376 MHz,  $\text{CDCl}_3$ )  $\delta$  -73.8; IR (neat): 2955 (bs), 2228 (s), 1690, 1423, 1214, 1171, 1141, 840, 564; HRESIMS Calcd for  $[\text{C}_{32}\text{H}_{26}\text{F}_3\text{NNaO}_6\text{S}_2]^+$  ( $\text{M} + \text{Na}^+$ ) 664.1046, found 664.1041.

**(E)-10-(((4-methyl-N-(6-oxohex-4-en-1-yl)phenyl)sulfonamido)ethynyl)phenanthren-9-yl trifluoromethanesulfonate (1ae)**

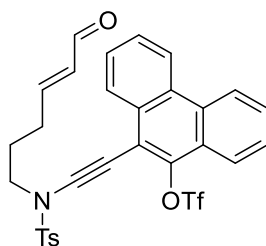

**1ae**

Compound **1ae** was prepared in 64% yield (392 mg) with  $E/Z = 10/1$  according to the general procedure as a pale yellow oil.  $^1\text{H NMR}$  (400 MHz,  $\text{CDCl}_3$ )  $\delta$  9.50 (d,  $J = 7.6$  Hz, 1H), 8.69 – 8.66 (m, 2H), 8.52 – 8.50 (m, 1H), 8.01 (d,  $J = 8.0$  Hz, 1H), 7.88 (d,  $J = 8.0$  Hz, 2H), 7.78 – 7.67 (m, 4H), 7.34 (d,  $J = 8.0$  Hz, 2H), 6.89 – 6.82 (m, 1H), 6.15 (dd,  $J = 15.6, 7.6$  Hz, 1H), 3.60 (t,  $J = 7.2$  Hz, 2H), 2.53 – 2.46 (m, 2H), 2.43 (s, 3H), 2.11 – 2.03 (m, 2H);  $^{13}\text{C NMR}$  (100 MHz,  $\text{CDCl}_3$ )  $\delta$  193.8, 156.5, 145.2, 144.4, 134.5, 133.6, 131.0, 130.5, 130.1, 129.1, 128.4, 128.3, 128.2, 127.8, 127.7, 127.6, 124.8, 123.1, 122.8, 121.4, 118.5 (q,  $J = 320.7$  Hz), 114.5, 94.3, 64.7, 50.9, 29.3, 26.4, 21.6;  $^{19}\text{F NMR}$  (376 MHz,  $\text{CDCl}_3$ )  $\delta$  -72.9; IR (neat): 2926 (bs), 2232 (s), 1959, 1691, 1420, 1212, 1170, 818, 750, 579; HRESIMS Calcd for  $[\text{C}_{30}\text{H}_{24}\text{F}_3\text{NNaO}_6\text{S}_2]^+$  ( $\text{M} + \text{Na}^+$ ) 638.0889, found 638.0881.

**(E)-1-(((4-methyl-N-(6-oxohex-4-en-1-yl)phenyl)sulfonamido)ethynyl)-5,6,7,8-tetrahydronaphthalen-2-yl trifluoromethanesulfonate (1af)**

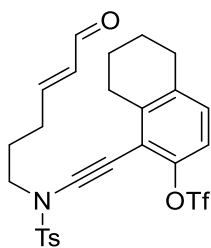

**1af**

Compound **1af** was prepared in 59% yield (340 mg) with  $E/Z = 14/1$  according to the general procedure as a pale yellow oil.  $^1\text{H NMR}$  (400 MHz,  $\text{CDCl}_3$ )  $\delta$  9.50 (d,  $J = 7.6$  Hz, 1H), 7.83 (d,  $J = 8.4$  Hz, 2H), 7.35 (d,  $J = 8.0$  Hz, 2H), 7.03 (d,  $J = 8.8$  Hz, 1H), 6.95 (d,  $J = 8.8$  Hz, 1H), 6.87 – 6.79 (m, 1H), 6.12 (dd,  $J = 15.6, 7.6$  Hz, 1H), 3.51 (t,  $J = 6.8$  Hz, 2H), 3.26 – 3.21 (m, 1H), 2.85 (t,  $J = 6.0$  Hz, 2H), 2.75 (t,  $J = 6.0$  Hz, 2H), 2.45 (s, 3H), 2.43 – 2.41 (m, 1H), 2.02 – 1.95 (m, 2H), 1.87 – 1.72 (m, 4H);  $^{13}\text{C NMR}$

(100 MHz, CDCl<sub>3</sub>)  $\delta$  193.8, 156.5, 147.3, 145.1, 141.5, 137.8, 134.6, 133.5, 130.0, 129.6, 129.3, 127.5, 121.7 (q,  $J = 299.7$  Hz), 117.6, 93.0, 63.9, 51.0, 47.9, 29.4, 28.5, 26.3, 25.2, 22.4, 21.6; <sup>19</sup>F NMR (376 MHz, CDCl<sub>3</sub>)  $\delta$  -73.8; IR (neat): 2944 (bs), 2234 (s), 1689, 1422, 1170, 1140, 947, 705, 545; HRESIMS Calcd for [C<sub>26</sub>H<sub>26</sub>F<sub>3</sub>NNaO<sub>6</sub>S<sub>2</sub>]<sup>+</sup> (M + Na<sup>+</sup>) 592.1046, found 592.1047.

**(E)-N-((2-iodonaphthalen-1-yl)ethynyl)-4-methyl-N-(6-oxohex-4-en-1-yl)benzenesulfonamide (1ag)**

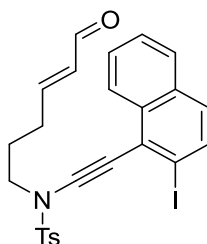

**1ag**

Compound **1ag** was prepared in 44% yield (241 mg) with  $E/Z > 20/1$  according to the general procedure as a pale yellow oil. <sup>1</sup>H NMR (400 MHz, CDCl<sub>3</sub>)  $\delta$  9.50 (d,  $J = 7.6$  Hz, 1H), 8.29 (d,  $J = 8.4$  Hz, 1H), 7.92 (d,  $J = 8.4$  Hz, 2H), 7.81 – 7.77 (m, 2H), 7.58 – 7.50 (m, 2H), 7.45 (d,  $J = 8.8$  Hz, 1H), 7.34 (d,  $J = 8.0$  Hz, 2H), 6.89 – 6.81 (m, 1H), 6.14 (dd,  $J = 15.6, 7.6$  Hz, 1H), 3.60 (t,  $J = 6.8$  Hz, 2H), 2.54 – 2.46 (m, 2H), 2.43 (s, 3H), 2.16 – 2.09 (m, 2H); <sup>13</sup>C NMR (100 MHz, CDCl<sub>3</sub>)  $\delta$  193.7, 156.3, 145.1, 134.8, 134.4, 133.9, 133.5, 132.1, 130.0, 128.6, 128.2, 127.7, 127.6, 127.1, 126.8, 126.5, 98.1, 90.6, 72.72, 50.9, 29.3, 26.2, 21.6; IR (neat): 2934 (bs), 2228 (s), 1686, 1363, 1169, 812, 737, 556; HRESIMS Calcd for [C<sub>25</sub>H<sub>22</sub>INNaO<sub>3</sub>S]<sup>+</sup> (M + Na<sup>+</sup>) 566.0257, found 566.0259.

**(E)-N-((2-isopropynaphthalen-1-yl)ethynyl)-4-methyl-N-(6-oxohex-4-en-1-yl)benzenesulfonamide (1ah)**



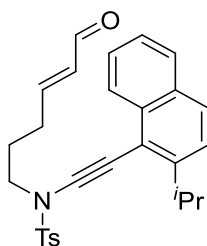

**1ah**

Compound **1ah** was prepared in 52% yield (237 mg) with *E/Z* > 20/1 according to the general procedure as a pale yellow oil. <sup>1</sup>H NMR (400 MHz, CDCl<sub>3</sub>) δ 9.51 (d, *J* = 7.6 Hz, 1H), 8.19 (d, *J* = 8.4 Hz, 1H), 7.88 (d, *J* = 8.4 Hz, 2H), 7.80 – 7.76 (m, 2H), 7.52 – 7.41 (m, 3H), 7.34 (d, *J* = 8.0 Hz, 2H), 6.89 – 6.82 (m, 1H), 6.18 – 6.12 (m, 1H), 3.63 – 3.55 (m, 3H), 2.56 – 2.50 (m, 2H), 2.44 (s, 3H), 2.08 – 2.01 (m, 2H), 1.29 (d, *J* = 6.8 Hz, 6H); <sup>13</sup>C NMR (100 MHz, CDCl<sub>3</sub>) δ 193.7, 156.3, 148.4, 144.9, 134.4, 133.5, 133.4, 131.6, 129.9, 128.3, 128.0, 127.6, 126.7, 125.9, 125.6, 123.1, 117.4, 90.3, 67.8, 50.9, 32.2, 29.2, 26.3, 23.2, 21.6; IR (neat): 2961 (bs), 2228 (s), 1690, 1363, 1186, 1135, 969, 819, 548; HRESIMS Calcd for [C<sub>28</sub>H<sub>29</sub>NNaO<sub>3</sub>S]<sup>+</sup> (M + Na<sup>+</sup>) 482.1760, found 482.1762.

**(*E*)-4-methyl-*N*-(6-oxohex-4-en-1-yl)-*N*-((2-phenylnaphthalen-1-yl)ethynyl)benzenesulfonamide (**1ai**)**

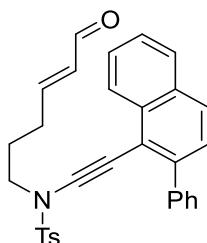

**1ai**

Compound **1ai** was prepared in 71% yield (305 mg) with *E/Z* > 20/1 according to the general procedure as a colorless oil. <sup>1</sup>H NMR (400 MHz, CDCl<sub>3</sub>) δ 9.47 (d, *J* = 7.6 Hz, 1H), 8.37 (d, *J* = 8.4 Hz, 1H), 7.86 (d, *J* = 8.0 Hz, 1H), 7.81 (d, *J* = 8.4 Hz, 1H), 7.69 (d, *J* = 8.4 Hz, 2H), 7.62 – 7.51 (m, 4H), 7.46 (d, *J* = 8.4 Hz, 1H), 7.42 – 7.32 (m, 3H), 7.26 (d, *J* = 8.4 Hz, 2H), 6.72 – 6.64 (m, 1H), 6.06 – 5.98 (m, 1H), 3.34 (t, *J* = 6.8 Hz, 2H), 2.41 (s, 3H), 2.29 – 2.23 (m, 2H), 1.69 – 1.61 (m, 2H); <sup>13</sup>C NMR (100 MHz, CDCl<sub>3</sub>) δ 193.7, 156.5, 144.8, 141.5, 141.2, 134.4, 133.3, 133.2, 132.2, 129.9, 129.6, 128.1, 128.0, 127.7, 127.5, 127.4, 127.3, 127.2, 126.5, 126.4, 118.1, 89.4, 69.3, 50.7,

29.1, 25.9, 21.6; IR (neat): 3056 (bs), 2228 (s), 1690, 1363, 1169, 1089, 765, 734, 703; HRESIMS Calcd for  $[C_{31}H_{27}NNaO_3S]^+$  ( $M + Na^+$ ) 516.1604, found 516.1607.

**(E)-3-methoxy-2-(((4-methyl-N-(6-oxohex-4-en-1-yl)phenyl)sulfonamido)ethynyl)phenyl 2,4,6-trimethylbenzenesulfonate (1aj)**

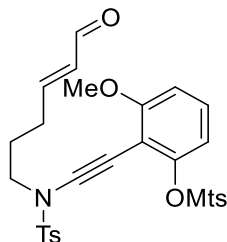

**1aj**

Compound **1aj** was prepared in 61% yield (365 mg) with  $E/Z > 20/1$  according to the general procedure as a colorless oil.  $^1H$  NMR (400 MHz,  $CDCl_3$ ) 9.49 (d,  $J = 8.0$  Hz, 1H), 7.95 (d,  $J = 8.0$  Hz, 2H), 7.36 (d,  $J = 8.0$  Hz, 2H), 7.03 – 6.99 (m, 3H), 6.92 – 6.85 (m, 1H), 6.74 (d,  $J = 8.4$  Hz, 1H), 6.15 – 6.09 (m, 2H), 3.89 (s, 3H), 3.47 (t,  $J = 6.8$  Hz, 2H), 2.56 (s, 6H), 2.51 – 1.43 (m, 2H), 2.45 (s, 3H), 2.34 (s, 3H), 2.03 – 1.99 (m, 2H);  $^{13}C$  NMR (100 MHz,  $CDCl_3$ )  $\delta$  194.1, 161.0, 157.4, 150.4, 144.6, 143.8, 140.2, 134.6, 133.3, 131.8, 131.7, 129.8, 128.2, 127.8, 112.8, 108.8, 108.4, 90.9, 62.7, 56.2, 51.0, 29.4, 25.9, 22.7, 21.6, 21.1; IR (neat): 3052 (bs), 2241 (s), 1691, 1360, 1169, 1090, 763, 735; HRESIMS Calcd for  $[C_{31}H_{33}NNaO_7S_2]^+$  ( $M + Na^+$ ) 618.1591, found 618.1595.

#### 4. General Procedures for the Intramolecular (4 + 2) Annulation

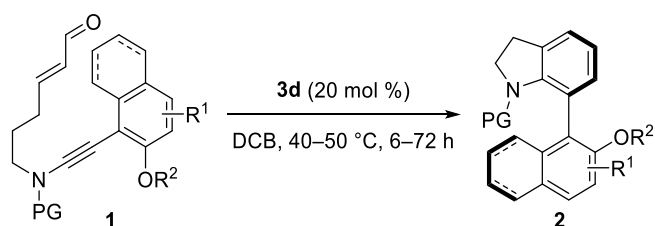

To a 10 mL vial charged with a stir bar were added ynamide **1** (0.10 mmol), 1,2-dichlorobenzene (2 mL) and chiral secondary amine catalyst **3d** (0.02 mmol, 10.2 mg) sequentially. The reaction mixture was stirred at 40–50 °C for 6–72 h, and the progress of the reaction was monitored by TLC. Upon completion, the reaction mixture was directly purified by column chromatography on silica gel (eluent: PE/EtOAc) to afford the desired axially chiral 7-aryl indoline **2**.

#### (*S*)-1-(1-tosylindolin-7-yl)naphthalen-2-yl 2,4,6-trimethylbenzenesulfonate (**2a**)

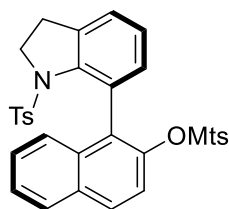

**2a**

Compound **2a** was prepared in 71% yield (42.4 mg) according to the general procedure at 50 °C as a yellow solid (mp 104–106 °C),  $[\alpha]_{\text{D}}^{20} = +132.0^\circ$  ( $c = 1.0$ ,  $\text{CHCl}_3$ ). 93% ee (determined by HPLC: Chiralpak IA Column, 30/70 *i*PrOH/hexane, 1.0 mL/min, 254 nm; TR = 7.54 min (major), 10.36 min (minor)). <sup>1</sup>H NMR (400 MHz,  $\text{CDCl}_3$ )  $\delta$  7.86 – 7.83 (m, 1H), 7.77 – 7.73 (m, 2H), 7.48 – 7.43 (m, 2H), 7.22 – 7.12 (m, 6H), 7.03 (d,  $J = 8.0$  Hz, 2H), 6.89 (s, 2H), 4.07 – 4.01 (m, 1H), 3.82 – 3.74 (m, 1H), 2.48 – 2.40 (m, 1H), 2.42 (s, 6H), 2.35 – 2.32 (m, 1H), 2.33 (s, 3H), 2.30 (s, 3H); <sup>13</sup>C NMR (100 MHz,  $\text{CDCl}_3$ )  $\delta$  144.4, 143.4, 143.2, 141.9, 139.8, 137.6, 135.5, 132.9, 132.5, 131.9, 131.8, 131.6, 130.2, 129.1, 128.1, 127.7, 127.1, 126.5, 126.4, 126.0, 125.7, 124.5, 119.9, 52.3, 29.3, 22.6, 21.5, 21.0; IR (neat): 3020 (bs), 1635, 1485, 1470, 1322, 1160, 1104, 978, 561; HRESIMS Calcd for  $[\text{C}_{34}\text{H}_{31}\text{NNaO}_5\text{S}_2]^+$  ( $\text{M} + \text{Na}^+$ ) 620.1536, found 620.1550.

When the (4 + 2) annulation was carried out under standard conditions with **1a** (*E/Z* = 6/1), the desired product **2a** was obtained in 70% yield with 93% ee. This result is consistent with the experiment using (*E*)-**1a** as substrate.

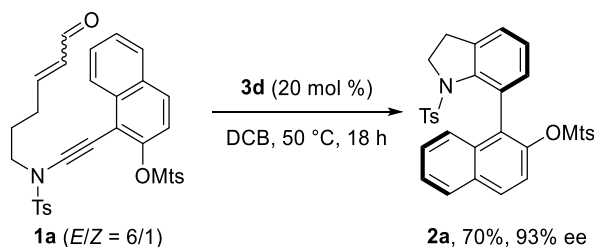

**(*S*)-1-(1-((4-methoxyphenyl)sulfonyl)indolin-7-yl)naphthalen-2-yl trimethylbenzenesulfonate (2b)** **2,4,6-**

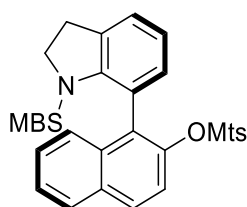

**2b**

Compound **2b** was prepared in 62% yield (48.8 mg) according to the general procedure at 50 °C as a pale yellow oil.  $[\alpha]_D^{20} = +242.5^\circ$  ( $c = 1.0$ ,  $\text{CHCl}_3$ ). 90% ee (determined by HPLC: Chiralpak IA Column, 30/70 *i*PrOH/hexane, 1.0 mL/min, 254 nm; TR = 8.77 min (major), 12.22 min (minor)).  $^1\text{H}$  NMR (400 MHz,  $\text{CDCl}_3$ )  $\delta$  7.85 – 7.83 (m, 1H), 7.78 – 7.73 (m, 2H), 7.48 – 7.43 (m, 2H), 7.31 – 7.27 (m, 2H), 7.23 – 7.11 (m, 4H), 6.89 (s, 2 H), 6.73 – 6.69 (m, 2H), 4.05 – 3.97 (m, 1H), 3.88 – 3.77 (m, 1H), 3.79 (s, 3H), 2.54 – 2.46 (m, 1H), 2.43 (s, 6H), 2.38 – 2.33 (m, 1H), 2.31 (s, 3H);  $^{13}\text{C}$  NMR (100 MHz,  $\text{CDCl}_3$ )  $\delta$  162.9, 144.4, 143.2, 142.0, 139.8, 137.7, 132.9, 132.5, 132.0, 131.9, 131.6, 130.2, 130.0, 129.2, 129.1, 128.1, 127.8, 126.5, 126.4, 126.1, 125.7, 124.5, 119.9, 113.7, 55.5, 52.2, 29.3, 22.6, 21.0; IR (neat): 2940 (bs), 1636, 1345, 1234, 1171, 1009, 777, 613, 572; HRESIMS Calcd for  $[\text{C}_{34}\text{H}_{31}\text{NNaO}_6\text{S}_2]^+$  ( $\text{M} + \text{Na}^+$ ) 636.1485, found 636.1488.

**(*S*)-1-(1-(mesitylsulfonyl)indolin-7-yl)naphthalen-2-yl trimethylbenzenesulfonate (2c)** **2,4,6-**

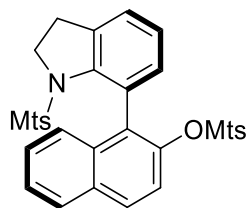

**2c**

Compound **2c** was prepared in 45% yield (48.8 mg) according to the general procedure at 50 °C as a pale yellow oil.  $[\alpha]_D^{20} = +164.1^\circ$  ( $c = 1.0$ ,  $\text{CHCl}_3$ ). 94% ee (determined by HPLC: Chiralpak IA Column, 30/70 *i*PrOH/hexane, 1.0 mL/min, 254 nm; TR = 5.61 min (major), 7.27 min (minor)).  $^1\text{H}$  NMR (400 MHz,  $\text{CDCl}_3$ )  $\delta$  7.79 (d,  $J = 8.4$  Hz, 1H), 7.73 (d,  $J = 8.0$  Hz, 1H), 7.48 – 7.37 (m, 3H), 7.27 (d,  $J = 9.2$  Hz, 1H), 7.03 – 6.99 (m, 1H), 6.94 (d,  $J = 9.2$  Hz, 1H), 6.80 – 6.78 (m, 3H), 6.45 (s, 2H), 4.48 – 4.42 (m, 1H), 3.67 – 3.59 (m, 1H), 3.36 – 3.27 (m, 1H), 2.76 (dd,  $J = 15.2, 7.0$  Hz, 1H), 2.29 (s, 3H), 2.25 (s, 6H), 2.15 (s, 3H), 2.00 (s, 6H);  $^{13}\text{C}$  NMR (100 MHz,  $\text{CDCl}_3$ )  $\delta$  143.9, 143.3, 143.0, 141.2, 140.1, 138.7, 138.2, 134.8, 132.7, 132.0, 131.6, 131.4, 129.1, 128.8, 127.6, 127.5, 126.4, 126.3, 125.9, 125.4, 124.5, 120.2, 52.9, 30.8, 22.7, 22.1, 21.0, 20.8; IR (neat): 2944 (bs), 1615, 1494, 1361, 1265, 1168, 830, 578; HRESIMS Calcd for  $[\text{C}_{36}\text{H}_{35}\text{NNaO}_5\text{S}_2]^+$  ( $\text{M} + \text{Na}^+$ ) 648.1849, found 648.1853.

**(S)-1-(1-(phenylsulfonyl)indolin-7-yl)naphthalen-2-yl  
trimethylbenzenesulfonate (2d)**

**2,4,6-**

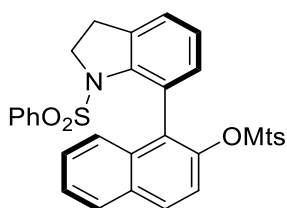

**2d**

Compound **2d** was prepared in 79% yield (48.8 mg) according to the general procedure at 50 °C as a pale yellow oil.  $[\alpha]_D^{20} = +192.5^\circ$  ( $c = 1.0$ ,  $\text{CHCl}_3$ ). 94% ee (determined by HPLC: Chiralpak ADH Column, 30/70 *i*PrOH/hexane, 1.0 mL/min, 254 nm; TR = 7.23 min (major), 10.55 min (minor)).  $^1\text{H}$  NMR (400 MHz,  $\text{CDCl}_3$ )  $\delta$  7.85 – 7.77 (m, 2H), 7.75 (d,  $J = 9.2$  Hz, 1H), 7.48 – 7.41 (m, 3H), 7.34 – 7.32 (m, 2H), 7.25 – 7.10 (m, 5H),

6.88 (s, 2H), 4.10 – 4.03 (m, 1H), 3.81 – 3.74 (m, 1H), 2.53 – 2.44 (m, 1H), 2.41 (s, 6H), 2.35 – 2.31 (m, 1H), 2.29 (s, 3H);  $^{13}\text{C}$  NMR (100 MHz,  $\text{CDCl}_3$ )  $\delta$  144.3, 143.2, 141.8, 139.7, 138.3, 137.5, 132.9, 132.6, 131.9, 131.8, 131.6, 130.0, 129.2, 128.5, 128.0, 127.6, 127.0, 126.5, 126.4, 126.1, 125.7, 124.5, 119.9, 52.3, 29.3, 22.6, 21.0; IR (neat): 2945 (bs), 1605, 1366, 1203, 1157, 943, 680, 572; HRESIMS Calcd for  $[\text{C}_{33}\text{H}_{29}\text{NNaO}_5\text{S}_2]^+$  ( $\text{M} + \text{Na}^+$ ) 606.1379, found 606.1372.

**(S)-1-(1-((4-bromophenyl)sulfonyl)indolin-7-yl)naphthalen-2-yl  
trimethylbenzenesulfonate (2e)**

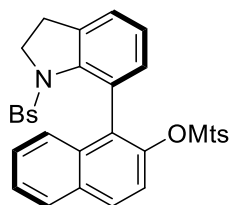

**2e**

Compound **2e** was prepared in 70% yield (48.8 mg) according to the general procedure at 50 °C as a pale yellow oil.  $[\alpha]_{\text{D}}^{20} = +240.6^\circ$  ( $c = 1.0$ ,  $\text{CHCl}_3$ ). 94% ee (determined by HPLC: Chiralpak IA Column, 30/70  $i$ PrOH/hexane, 1.0 mL/min, 254 nm; TR = 7.12 min (major), 8.94 min (minor)).  $^1\text{H}$  NMR (400 MHz,  $\text{CDCl}_3$ )  $\delta$  7.85 – 7.82 (m, 1H), 7.75 (d,  $J = 8.8$  Hz, 1H), 7.69 (dd,  $J = 8.4, 6.4$  Hz, 1H), 7.49 – 7.42 (m, 2H), 7.34 – 7.30 (m, 2H), 7.22 – 7.13 (m, 6H), 6.90 (s, 2H), 4.14 – 4.07 (m, 1H), 3.88 – 3.80 (m, 1H), 2.64 – 2.56 (m, 1H), 2.48 – 2.44 (m, 1H), 2.42 (s, 6H), 2.32 (s, 3H);  $^{13}\text{C}$  NMR (100 MHz,  $\text{CDCl}_3$ )  $\delta$  144.5, 143.4, 141.6, 139.8, 137.7, 137.3, 132.8, 132.4, 132.0, 131.9, 131.7, 131.6, 129.8, 129.3, 128.3, 128.1, 127.5, 127.4, 126.6, 126.3, 126.2, 125.8, 124.7, 119.8, 52.5, 29.5, 22.6, 21.0; IR (neat): 3044 (bs), 1635, 1363, 1265, 1170, 1010, 953, 572; HRESIMS Calcd for  $[\text{C}_{33}\text{H}_{28}\text{BrNNaO}_5\text{S}_2]^+$  ( $\text{M} + \text{Na}^+$ ) 684.0484, found 684.0480.

**(S)-1-(1-(methylsulfonyl)indolin-7-yl)naphthalen-2-yl  
trimethylbenzenesulfonate (2f)**

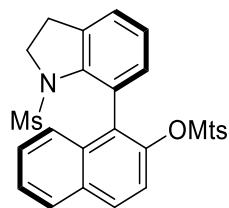

**2f**

Compound **2f** was prepared in 80% yield (48.8 mg) according to the general procedure at 50 °C as a pale yellow oil.  $[\alpha]_{\text{D}}^{20} = +90.2^\circ$  ( $c = 1.0$ ,  $\text{CHCl}_3$ ). 88% ee (determined by HPLC: Chiralpak IA Column, 30/70 *i*PrOH/hexane, 1.0 mL/min, 254 nm; TR = 6.46 min (major), 7.72 min (minor)).  $^1\text{H}$  NMR (400 MHz,  $\text{CDCl}_3$ )  $\delta$  7.86 – 7.75 (m, 3H), 7.50 – 7.42 (m, 2H), 7.33 (d,  $J = 9.2$  Hz, 1H), 7.27 (d,  $J = 8.4$  Hz, 1H), 7.09 – 7.05 (m, 1H), 6.97 (d,  $J = 7.6$  Hz, 1H), 6.86 (s, 2H), 4.32 – 4.25 (m, 1H), 3.81 – 3.73 (m, 1H), 3.29 – 3.21 (m, 1H), 2.87 – 2.80 (m, 1H), 2.35 (s, 6H), 2.31 (s, 3H), 2.26 (s, 3H);  $^{13}\text{C}$  NMR (100 MHz,  $\text{CDCl}_3$ )  $\delta$  144.1, 143.3, 142.3, 139.8, 136.5, 133.0, 132.1, 131.9, 131.7, 131.3, 129.7, 129.5, 127.9, 127.0, 126.7, 126.2, 126.1, 125.5, 124.6, 120.1, 52.4, 40.2, 30.6, 22.7, 21.0; IR (neat): 2945 (bs), 1535, 1422, 1354, 1277, 940, 832, 732, 684, 577; HRESIMS Calcd for  $[\text{C}_{28}\text{H}_{27}\text{NNaO}_5\text{S}_2]^+$  ( $\text{M} + \text{Na}^+$ ) 544.1223, found 544.1219.

**(S)-1-(1-(tosylindolin-7-yl)naphthalen-2-yl) 4-methylbenzenesulfonate (2g)**

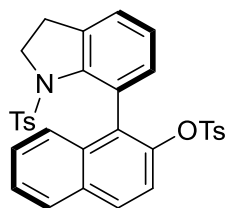

**2g**

Compound **2g** was prepared in 66% yield (48.8 mg) according to the general procedure at 50 °C as a pale yellow oil.  $[\alpha]_{\text{D}}^{20} = +269.6^\circ$  ( $c = 1.0$ ,  $\text{CHCl}_3$ ). 88% ee (determined by HPLC: Chiralpak IA Column, 30/70 *i*PrOH/hexane, 1.0 mL/min, 254 nm; TR = 10.64 min (major), 15.61 min (minor)).  $^1\text{H}$  NMR (400 MHz,  $\text{CDCl}_3$ )  $\delta$  7.88 – 7.80 (m, 3H), 7.49 – 7.45 (m, 3H), 7.32 (d,  $J = 8.4$  Hz, 2H), 7.18 – 7.08 (m, 6H), 7.03 – 6.97 (m, 3H), 4.09 – 4.03 (m, 1H), 3.70 – 3.62 (m, 1H), 2.48 – 2.41 (m, 1H), 2.38 (s, 3H), 2.36 – 2.35 (m, 1H), 2.33 (s, 3H);  $^{13}\text{C}$  NMR (100 MHz,  $\text{CDCl}_3$ )  $\delta$  144.5, 143.7, 143.4, 142.2, 137.9,

135.5, 133.3, 133.0, 132.2, 131.7, 130.0, 129.5, 129.2, 129.1, 128.1, 128.0, 127.6, 127.1, 126.6, 125.8, 125.7, 124.3, 120.4, 52.2, 29.5, 21.6, 21.5; IR (neat): 3061 (bs), 1597, 1356, 1280, 1167, 1092, 956, 737; HRESIMS Calcd for  $[C_{32}H_{27}NNaO_5S_2]^+$  ( $M + Na^+$ ) 592.1223, found 592.1221.

**(S)-1-(1-tosylindolin-7-yl)naphthalen-2-yl 4-methoxybenzenesulfonate (2h)**

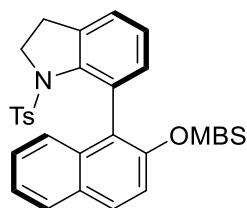

**2h**

Compound **2h** was prepared in 49% yield (48.8 mg) according to the general procedure at 50 °C as a pale yellow oil.  $[\alpha]_D^{20} = +228.1^\circ$  ( $c = 1.0$ ,  $CHCl_3$ ). 92% ee (determined by HPLC: Chiralpak IA Column, 30/70 *i*PrOH/hexane, 1.0 mL/min, 254 nm; TR = 12.91 min (major), 19.25 min (minor)).  $^1H$  NMR (400 MHz,  $CDCl_3$ )  $\delta$  7.88 – 7.81 (m, 3H), 7.49 – 7.46 (m, 3H), 7.33 (d,  $J = 8.8$  Hz, 2H), 7.18 – 7.10 (m, 4H), 7.02 (d,  $J = 8.0$  Hz, 2H), 6.98 (d,  $J = 7.2$  Hz, 1H), 6.76 (d,  $J = 8.8$  Hz, 2H), 4.09 – 4.03 (m, 1H), 3.81 (s, 3H), 3.71 – 3.63 (m, 1H), 2.47 – 2.37 (m, 2H), 2.33 (s, 3H);  $^{13}C$  NMR (100 MHz,  $CDCl_3$ )  $\delta$  163.6, 143.7, 143.4, 142.2, 137.9, 135.4, 133.0, 132.2, 131.7, 130.1, 129.9, 129.2, 129.1, 128.1, 127.7, 127.5, 127.0, 126.5, 125.9, 125.7, 124.3, 120.5, 114.0, 55.7, 52.2, 29.5, 21.5; IR (neat): 3060 (bs), 1597, 1356, 1280, 1165, 1092, 934, 823, 688; HRESIMS Calcd for  $[C_{32}H_{27}NNaO_6S_2]^+$  ( $M + Na^+$ ) 608.1172, found 608.1180.

**(S)-1-(1-tosylindolin-7-yl)naphthalen-2-yl 4-(tert-butyl)benzenesulfonate (2i)**

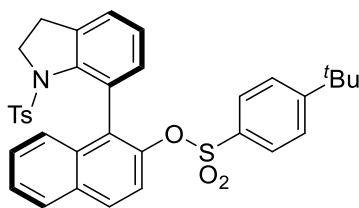

**2i**

Compound **2i** was prepared in 65% yield (48.8 mg) according to the general procedure



at 50 °C as a Pale yellow oil.  $[\alpha]_D^{20} = +219.6^\circ$  ( $c = 1.0$ ,  $\text{CHCl}_3$ ). 92% ee (determined by HPLC: Chiralpak IA Column, 30/70  $i$ PrOH/hexane, 1.0 mL/min, 254 nm; TR = 9.03 min (major), 11.34 min (minor)).  $^1\text{H NMR}$  (400 MHz,  $\text{CDCl}_3$ )  $\delta$  7.89 – 7.83 (m, 3H), 7.53 – 7.47 (m, 3H), 7.36 – 7.28 (m, 4H), 7.18 – 7.07 (m, 4H), 7.03 (d,  $J = 7.6$  Hz, 2H), 6.94 (d,  $J = 7.6$  Hz, 1H), 4.07 – 4.02 (m, 1H), 3.62 – 3.54 (m, 1H), 2.47 – 2.38 (m, 2H), 2.33 (s, 3H), 1.31 (s, 9H);  $^{13}\text{C NMR}$  (100 MHz,  $\text{CDCl}_3$ )  $\delta$  157.5, 143.7, 143.4, 142.2, 137.9, 135.5, 133.1, 133.0, 132.2, 131.6, 129.9, 129.3, 129.1, 128.1, 127.7, 127.6, 127.1, 126.6, 125.9, 125.8, 125.7, 124.3, 120.5, 52.1, 35.2, 31.0, 29.5, 21.5; IR (neat): 2963 (bs), 1595, 1358, 1280, 1167, 1089, 955, 800, 679, 572; HRESIMS Calcd for  $[\text{C}_{35}\text{H}_{33}\text{NNaO}_5\text{S}_2]^+$  ( $\text{M} + \text{Na}^+$ ) 634.1692, found 634.1692.

**(S)-1-(1-tosylindolin-7-yl)naphthalen-2-yl 4-bromobenzenesulfonate (2j)**

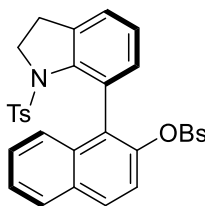

**2j**

Compound **2j** was prepared in 70% yield (48.8 mg) according to the general procedure at 50 °C as a pale yellow oil.  $[\alpha]_D^{20} = +206.8^\circ$  ( $c = 1.0$ ,  $\text{CHCl}_3$ ). 88% ee (determined by HPLC: Chiralpak IA Column, 30/70  $i$ PrOH/hexane, 1.0 mL/min, 254 nm; TR = 9.84 min (major), 14.86 min (minor)).  $^1\text{H NMR}$  (400 MHz,  $\text{CDCl}_3$ )  $\delta$  7.89 – 7.84 (m, 3H), 7.51 – 7.46 (m, 3H), 7.44 – 7.41 (m, 2H), 7.24 – 7.21 (m, 2H), 7.16 – 7.14 (m, 3H), 7.11 – 7.08 (m, 1H), 7.02 (d,  $J = 8.0$  Hz, 2H), 6.90 (dd,  $J = 7.6, 1.2$  Hz, 1H), 4.12 – 4.05 (m, 1H), 3.71 – 3.63 (m, 1H), 2.42 – 2.37 (m, 2H), 2.33 (s, 3H);  $^{13}\text{C NMR}$  (100 MHz,  $\text{CDCl}_3$ )  $\delta$  143.5, 143.3, 142.2, 138.0, 135.3, 134.9, 133.0, 132.3, 132.2, 131.5, 129.8, 129.4, 129.2, 129.1, 128.8, 128.2, 127.3, 127.0, 126.7, 126.5, 126.0, 125.9, 124.4, 120.4, 52.2, 29.4, 21.5; IR (neat): 2943 (bs), 1635, 1357, 1201, 1166, 1091, 954, 800, 678; HRESIMS Calcd for  $[\text{C}_{31}\text{H}_{24}\text{BrNNaO}_5\text{S}_2]^+$  ( $\text{M} + \text{Na}^+$ ) 656.0171, found 656.0174.

**(S)-1-(1-tosylindolin-7-yl)naphthalen-2-yl 4-nitrobenzenesulfonate (2k)**

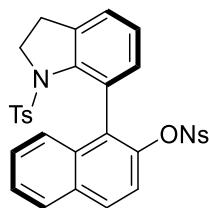

**2k**

Compound **2k** was prepared in 41% yield (48.8 mg) according to the general procedure at 40 °C as a pale yellow oil.  $[\alpha]_D^{20} = +228.1^\circ$  ( $c = 1.0$ ,  $\text{CHCl}_3$ ). 86% ee (determined by HPLC: Chiralpak IA Column, 50/50 *i*PrOH/hexane, 1.0 mL/min, 254 nm; TR = 8.36 min (major), 11.54 min (minor)).  $^1\text{H}$  NMR (400 MHz,  $\text{CDCl}_3$ )  $\delta$  8.09 (d,  $J = 8.8$  Hz, 2H), 7.89 – 7.83 (m, 3H), 7.56 – 7.48 (m, 5H), 7.16 – 7.13 (m, 3H), 7.05 – 7.00 (m, 3H), 6.84 (d,  $J = 7.6$  Hz, 1H), 4.12 – 4.06 (m, 1H), 3.77 – 3.69 (m, 1H), 2.44 – 2.37 (m, 2H), 2.33 (s, 3H);  $^{13}\text{C}$  NMR (100 MHz,  $\text{CDCl}_3$ )  $\delta$  150.4, 143.7, 143.2, 142.3, 141.4, 138.1, 135.2, 132.9, 132.4, 131.4, 129.6, 129.2, 129.1, 128.2, 127.0(3), 127.0(0), 126.9, 126.5, 126.2, 125.8, 124.5, 123.9, 120.2, 52.2, 29.4, 21.5; IR (neat): 2948 (bs), 1637, 1546, 1357, 1166, 803, 737, 680, 588; HRESIMS Calcd for  $[\text{C}_{31}\text{H}_{24}\text{N}_2\text{NaO}_7\text{S}_2]^+$  ( $\text{M} + \text{Na}^+$ ) 623.0917, found 623.0916.

**(S)-1-(1-tosylindolin-7-yl)naphthalen-2-yl 2-nitrobenzenesulfonate (2l)**

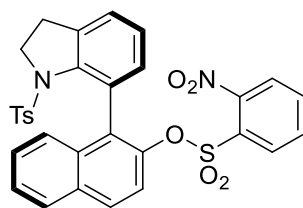

**2l**

Compound **2l** was prepared in 45% yield (48.8 mg) according to the general procedure at 40 °C as a pale yellow oil.  $[\alpha]_D^{20} = +148.5^\circ$  ( $c = 1.0$ ,  $\text{CHCl}_3$ ). 81% ee (determined by HPLC: Chiralpak IA Column, 50/50 *i*PrOH/hexane, 1.0 mL/min, 254 nm; TR = 8.10 min (major), 9.27 min (minor)).  $^1\text{H}$  NMR (400 MHz,  $\text{CDCl}_3$ )  $\delta$  7.89 – 7.81 (m, 3H), 7.70 – 7.62 (m, 3H), 7.56 – 7.46 (m, 3H), 7.37 (d,  $J = 9.2$  Hz, 1H), 7.21 – 7.19 (m, 2H), 7.07 – 7.03 (m, 3H), 6.90 – 6.86 (m, 1H), 6.78 (d,  $J = 7.6$  Hz, 1H), 4.17 – 4.11 (m, 1H), 4.05 – 3.97 (m, 1H), 2.51 – 2.43 (m, 2H), 2.34 (s, 3H);  $^{13}\text{C}$  NMR (100 MHz,  $\text{CDCl}_3$ )  $\delta$

143.9, 143.4, 142.4, 138.4, 134.6, 133.1, 132.3, 132.0, 131.2, 130.8, 129.9, 129.4, 129.2, 128.1, 126.9, 126.7, 126.6(8), 126.6(0), 126.2, 125.4, 124.8, 124.4, 120.8, 52.3, 29.5, 21.5; IR (neat): 2945 (bs), 1533, 1353, 1201, 1166, 1091, 954, 803, 680, 571; HRESIMS Calcd for  $[C_{31}H_{24}N_2NaO_7S_2]^+$  ( $M + Na^+$ ) 623.0917, found 623.0911.

**(S)-1-(1-tosylindolin-7-yl)naphthalen-2-yl naphthalene-1-sulfonate (2m)**

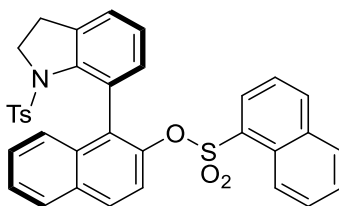

**2m**

Compound **2m** was prepared in 79% yield (48.8 mg) according to the general procedure at 50 °C as a pale yellow oil.  $[\alpha]_D^{20} = +137.0^\circ$  ( $c = 1.0$ ,  $CHCl_3$ ). 85% ee (determined by HPLC: Chiralpak IA Column, 30/70  $i$ PrOH/hexane, 1.0 mL/min, 254 nm; TR = 11.27 min (major), 15.53 min (minor)).  $^1H$  NMR (400 MHz,  $CDCl_3$ )  $\delta$  8.57 – 8.54 (m, 1H), 8.02 (d,  $J = 8.0$  Hz, 1H), 7.88 – 7.83 (m, 3H), 7.78 (d,  $J = 9.2$  Hz, 2H), 7.57 – 7.52 (m, 2H), 7.48 – 7.41 (m, 2H), 7.38 – 7.32 (m, 2H), 7.11 (d,  $J = 8.0$  Hz, 2H), 6.96 (d,  $J = 8.0$  Hz, 2H), 6.87 (d,  $J = 6.8$  Hz, 1H), 6.83 – 6.79 (m, 1H), 6.74 (d,  $J = 7.2$  Hz, 1H), 3.99 – 3.92 (m, 1H), 3.42 – 3.34 (m, 1H), 2.30 (s, 3H), 2.30 – 2.23 (m, 1H), 2.05 – 1.98 (m, 1H);  $^{13}C$  NMR (100 MHz,  $CDCl_3$ )  $\delta$  144.0, 143.3, 141.6, 137.3, 135.6, 135.0, 134.1, 133.2, 132.4, 132.2, 131.4, 130.0, 129.8, 129.1, 129.0, 128.6, 128.4, 128.3, 128.0, 127.0, 126.9, 126.8, 126.6, 126.5, 125.8, 125.3, 125.1, 124.1, 124.0, 121.0, 52.0, 29.3, 21.4; IR (neat): 2936 (bs), 1533, 1201, 1167, 1090, 954, 572; HRESIMS Calcd for  $[C_{35}H_{27}NNaO_5S_2]^+$  ( $M + Na^+$ ) 628.1223, found 628.1227.

**(S)-1-(1-tosylindolin-7-yl)naphthalen-2-yl methanesulfonate (2n)**

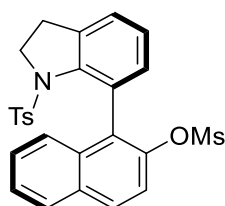

## 2n

Compound **2n** was prepared in 68% yield (48.8 mg) according to the general procedure at 40 °C as a pale yellow oil.  $[\alpha]_D^{20} = +180.5^\circ$  ( $c = 1.0$ ,  $\text{CHCl}_3$ ). 68% ee (determined by HPLC: Chiralpak IA Column, 20/80 *i*PrOH/hexane, 1.0 mL/min, 254 nm; TR = 20.26 min (major), 22.81 min (minor)).  $^1\text{H}$  NMR (400 MHz,  $\text{CDCl}_3$ )  $\delta$  7.88 – 7.86 (m, 3H), 7.57 (d,  $J = 9.2$  Hz, 1H), 7.53 – 7.49 (m, 2H), 7.34 – 7.27 (m, 3H), 7.18 (d,  $J = 7.6$  Hz, 2H), 7.06 (d,  $J = 7.6$  Hz, 2H), 4.18 – 4.13 (m, 1H), 4.06 – 3.98 (m, 1H), 2.66 (s, 3H), 2.62 – 2.49 (m, 2H), 2.35 (s, 3H);  $^{13}\text{C}$  NMR (100 MHz,  $\text{CDCl}_3$ )  $\delta$  144.1, 143.6, 142.4, 138.2, 135.4, 132.8, 132.2, 131.8, 129.6, 129.2, 129.1, 128.2, 127.5, 127.0, 126.8, 126.5, 126.2, 125.9, 124.9, 120.1, 52.4, 37.6, 29.6, 21.5; IR (neat): 3044 (bs), 1635, 1360, 1281, 1166, 1090, 1038, 951, 677, 570; HRESIMS Calcd for  $[\text{C}_{26}\text{H}_{23}\text{NNaO}_5\text{S}_2]^+$  ( $\text{M} + \text{Na}^+$ ) 516.0910, found 516.0903.

## (*S*)-1-(1-tosylindolin-7-yl)naphthalen-2-yl trifluoromethanesulfonate (**2o**)

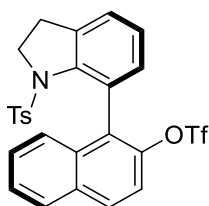

## 2o

Compound **2o** was prepared in 67% yield (48.8 mg) according to the general procedure at 40 °C as a yellow solid (mp 85–87 °C),  $[\alpha]_D^{20} = +271.7^\circ$  ( $c = 1.0$ ,  $\text{CHCl}_3$ ). 96% ee (determined by HPLC: Chiralpak ODH Column, 30/70 *i*PrOH/hexane, 1.0 mL/min, 254 nm; TR = 5.25 min (minor), 6.80 min (major)).  $^1\text{H}$  NMR (400 MHz,  $\text{CDCl}_3$ )  $\delta$  7.95 – 7.90 (m, 3H), 7.56 – 7.55 (m, 2H), 7.41 (d,  $J = 9.2$  Hz, 1H), 7.33 – 7.28 (m, 5H), 7.12 – 7.10 (m, 2H), 4.16 – 4.11 (m, 1H), 4.05 – 3.97 (m, 1H), 2.53 – 2.34 (m, 2H), 2.36 (s, 3H);  $^{13}\text{C}$  NMR (100 MHz,  $\text{CDCl}_3$ )  $\delta$  144.1, 143.7, 142.1, 138.4, 135.2, 133.1, 132.7, 132.0, 130.6, 130.0, 129.3, 128.3, 127.2, 126.7, 126.6, 126.4, 126.3, 125.4, 119.0, 118.4 (q,  $J = 320.3$  Hz), 52.3, 29.2, 21.5;  $^{19}\text{F}$  NMR (376 MHz,  $\text{CDCl}_3$ )  $\delta$  -74.5; IR (neat): 2944 (bs), 1419, 1359, 1216, 1157, 949, 830, 678; HRESIMS Calcd for  $[\text{C}_{26}\text{H}_{20}\text{F}_3\text{NNaO}_5\text{S}_2]^+$  ( $\text{M} + \text{Na}^+$ ) 570.0627, found 570.0636.

**(S)-3-phenyl-1-(1-tosylindolin-7-yl)naphthalen-2-yl  
trimethylbenzenesulfonate (2p)**

**2,4,6-**

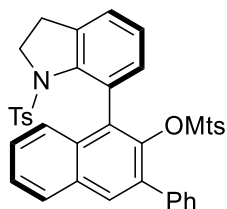

**2p**

Compound **2p** was prepared in 69% yield (46.5 mg) according to the general procedure at 50 °C as a pale yellow oil.  $[\alpha]_D^{20} = +85.4^\circ$  ( $c = 1.0$ ,  $\text{CHCl}_3$ ). 96% ee (determined by HPLC: Chiralpak ADH Column, 30/70 *i*PrOH/hexane, 1.0 mL/min, 254 nm; TR = 11.23 min (major), 14.96 min (minor)).  $^1\text{H NMR}$  (400 MHz,  $\text{CDCl}_3$ )  $\delta$  7.96 – 7.94 (m, 1H), 7.87 – 7.85 (m, 1H), 7.76 (s, 1H), 7.51 – 7.49 (m, 2H), 7.40 (d,  $J = 7.2$  Hz, 1H), 7.27 – 7.24 (m, 5H), 7.19 (d,  $J = 7.2$  Hz, 1H), 7.07 – 6.99 (m, 5H), 6.56 (s, 2H), 4.28 – 4.23 (m, 1H), 4.08 – 4.00 (m, 1H), 2.55 – 2.51 (m, 2H), 2.29 (s, 3H), 2.26 (s, 6H), 2.17 (s, 3H);  $^{13}\text{C NMR}$  (100 MHz,  $\text{CDCl}_3$ )  $\delta$  143.4, 142.9, 142.1, 142.0, 138.3, 137.8, 137.7, 135.9, 134.6, 133.8, 133.0, 132.8, 132.3, 131.2, 130.2, 129.2, 129.1, 128.4, 128.1, 127.5, 127.1, 126.8, 126.7, 126.4, 126.1, 125.8, 124.7, 52.5, 29.6, 22.6, 21.4, 20.8; IR (neat): 3042 (bs), 2924, 1601, 1408, 1360, 1279, 1166, 963, 801, 665; HRESIMS Calcd for  $[\text{C}_{40}\text{H}_{35}\text{NNaO}_5\text{S}_2]^+$  ( $\text{M} + \text{Na}^+$ ) 696.1849, found 696.1855.

**(S)-3-methoxy-1-(1-tosylindolin-7-yl)naphthalen-2-yl  
trimethylbenzenesulfonate (2q)**

**2,4,6-**

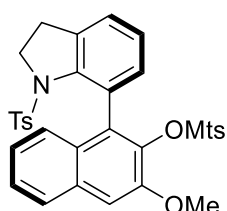

**2q**

Compound **2q** was prepared in 73% yield (45.8 mg) according to the general procedure at 50 °C as a pale yellow oil.  $[\alpha]_D^{20} = +139.0^\circ$  ( $c = 1.0$ ,  $\text{CHCl}_3$ ). 93% ee (determined by

HPLC: Chiralpak IA Column, 30/70 *i*PrOH/hexane, 1.0 mL/min, 254 nm; TR = 10.10 min (major), 11.58 min (minor). <sup>1</sup>H NMR (400 MHz, CDCl<sub>3</sub>) δ 7.72 (d, *J* = 8.0 Hz, 1H), 7.68 (d, *J* = 8.4 Hz, 1H), 7.44 – 7.28 (m, 5H), 7.22 – 7.18 (m, 1H), 7.11 – 7.06 (m, 4H), 6.89 (s, 2H), 4.14 – 4.07 (m, 1H), 4.02 – 3.95 (m, 1H), 3.52 (s, 3H), 2.54 (s, 6H), 2.47 – 2.37 (m, 2H), 2.34 (s, 3H), 2.30 (s, 3H); <sup>13</sup>C NMR (100 MHz, CDCl<sub>3</sub>) δ 150.3, 143.3, 142.0, 141.7, 138.7, 137.5, 137.3, 135.6, 134.9, 132.8, 132.1, 131.0, 129.1, 127.9, 127.6, 127.1, 126.8, 126.5, 126.2, 126.0, 124.7, 124.1, 106.8, 55.1, 52.3, 29.3, 22.6, 21.5, 20.9; IR (neat): 2943 (bs), 1635, 1467, 1362, 1277, 1167, 1077, 751, 676, 578; HRESIMS Calcd for [C<sub>35</sub>H<sub>33</sub>NNaO<sub>6</sub>S<sub>2</sub>]<sup>+</sup> (M + Na<sup>+</sup>) 650.1642, found 650.1648.

**(*S*)-6-bromo-1-(1-tosylindolin-7-yl)naphthalen-2-yl trimethylbenzenesulfonate (2r)** **2,4,6-**

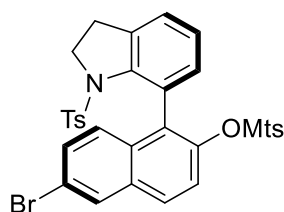

**2r**

Compound **2r** was prepared in 65% yield (48.8 mg) according to the general procedure at 50 °C as a pale yellow oil. [ $\alpha$ ]<sub>D</sub><sup>20</sup> = +130.0° (c = 1.0, CHCl<sub>3</sub>). 94% ee (determined by HPLC: Chiralpak IA Column, 15/85 *i*PrOH/hexane, 1.0 mL/min, 254 nm; TR = 13.99 min (major), 16.38 min (minor)). <sup>1</sup>H NMR (400 MHz, CDCl<sub>3</sub>) δ 8.00 (d, *J* = 2.0 Hz, 1H), 7.72 (d, *J* = 9.2 Hz, 1H), 7.68 (d, *J* = 9.2 Hz, 1H), 7.52 – 7.49 (m, 1H), 7.22 – 7.20 (m, 3H), 7.16 – 7.13 (m, 3H), 7.04 (d, *J* = 8.0 Hz, 2H), 6.89 (s, 2H), 4.05 – 3.99 (m, 1H), 3.80 – 3.73 (m, 1H), 2.46 (dd, *J* = 15.6, 8.0 Hz, 1H), 2.41 (s, 6H), 2.36 – 2.33 (m, 1H), 2.34 (s, 3H), 2.30 (s, 3H); <sup>13</sup>C NMR (100 MHz, CDCl<sub>3</sub>) δ 144.6, 143.5, 143.4, 141.9, 139.8, 137.7, 135.4, 133.0, 132.3, 131.7, 131.5, 130.6, 130.0, 129.9, 129.2, 128.4, 128.2, 127.1, 126.1, 124.7, 121.2, 119.9, 52.2, 29.3, 22.6, 21.5, 21.0; IR (neat): 2951 (bs), 2923, 1585, 1495, 1361, 1168, 953, 792, 679; HRESIMS Calcd for [C<sub>34</sub>H<sub>30</sub>BrNNaO<sub>5</sub>S<sub>2</sub>]<sup>+</sup> (M + Na<sup>+</sup>) 698.0641, found 698.0645.

**(S)-6-phenyl-1-(1-tosylindolin-7-yl)naphthalen-2-yl  
trimethylbenzenesulfonate (2s)**

**2,4,6-**

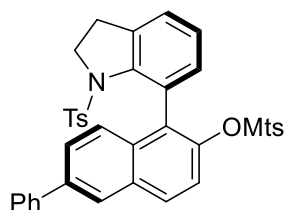

**2s**

Compound **2s** was prepared in 81% yield (48.8 mg) according to the general procedure at 50 °C as a pale yellow oil.  $[\alpha]_D^{20} = -103.8^\circ$  ( $c = 1.0$ ,  $\text{CHCl}_3$ ). 96% ee (determined by HPLC: Chiralpak IA Column, 30/70 *i*PrOH/hexane, 1.0 mL/min, 254 nm; TR = 10.74 min (major), 14.32 min (minor)).  $^1\text{H}$  NMR (400 MHz,  $\text{CDCl}_3$ )  $\delta$  8.03 (d,  $J = 1.6$  Hz, 1H), 7.85 – 7.80 (m, 2H), 7.72 – 7.69 (m, 3H), 7.48 – 7.44 (m, 2H), 7.38 – 7.34 (m, 1H), 7.26 (d,  $J = 8.4$  Hz, 2H), 7.22 – 7.12 (m, 4H), 7.04 (d,  $J = 8.0$  Hz, 2H), 6.89 (s, 2H), 4.09 – 4.02 (m, 1H), 3.83 – 3.76 (m, 1H), 2.51 – 2.45 (m, 1H), 2.43 (s, 6H), 2.37 – 2.34 (m, 1H), 2.33 (s, 3H), 2.30 (s, 3H);  $^{13}\text{C}$  NMR (100 MHz,  $\text{CDCl}_3$ )  $\delta$  144.4, 143.4, 143.2, 141.9, 140.8, 139.8, 138.3, 137.6, 135.5, 132.5, 132.2, 132.1, 131.9, 131.6, 130.1, 129.4, 129.2, 128.8, 127.6, 127.4, 127.1, 127.0, 126.3, 126.1, 125.9, 124.5, 120.4, 52.3, 29.3, 22.6, 21.5, 21.0; IR (neat): 2943 (bs), 2924, 1601, 1408, 1360, 1167, 963, 801, 665; HRESIMS Calcd for  $[\text{C}_{40}\text{H}_{35}\text{NNaO}_5\text{S}_2]^+$  ( $\text{M} + \text{Na}^+$ ) 696.1849, found 696.1852.

**(S)-6-methyl-1-(1-tosylindolin-7-yl)naphthalen-2-yl  
trimethylbenzenesulfonate (2t)**

**2,4,6-**

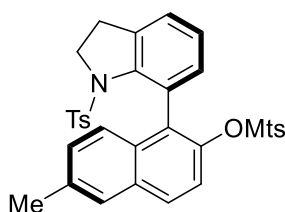

**2t**

Compound **2t** was prepared in 88% yield (48.8 mg) according to the general procedure at 50 °C as a pale yellow oil.  $[\alpha]_D^{20} = +111.5^\circ$  ( $c = 1.0$ ,  $\text{CHCl}_3$ ). 96% ee (determined by HPLC: Chiralpak IA Column, 30/70 *i*PrOH/hexane, 1.0 mL/min, 254 nm; TR = 7.52

min (major), 9.27 min (minor)).  $^1\text{H}$  NMR (400 MHz,  $\text{CDCl}_3$ )  $\delta$  7.69 – 7.65 (m, 2H), 7.60 (s, 1H), 7.28 (dd,  $J = 8.8, 1.6$  Hz, 1H), 7.23 – 7.21 (m, 2H), 7.19 – 7.14 (m, 2H), 7.12 (d,  $J = 6.4$  Hz, 2H), 7.03 (d,  $J = 8.0$  Hz, 2H), 6.87 (s, 2H), 4.07 – 4.01 (m, 1H), 3.80 – 3.72 (m, 1H), 2.48 (s, 3H), 2.45 – 2.42 (m, 1H), 2.40 (s, 6H), 2.36 – 2.35 (m, 1H), 2.33 (s, 3H), 2.29 (s, 3H);  $^{13}\text{C}$  NMR (100 MHz,  $\text{CDCl}_3$ )  $\delta$  143.7, 143.3, 143.1, 141.9, 139.8, 137.5, 135.5, 135.3, 132.4, 132.2, 131.8, 131.6, 131.1, 130.0, 129.1, 128.8, 128.4, 127.8, 127.1, 126.3, 125.9, 124.4, 120.0, 52.2, 29.3, 22.6, 21.5, 21.0; IR (neat): 2940 (bs), 1689, 1597, 1367, 1171, 950, 815, 734; HRESIMS Calcd for  $[\text{C}_{35}\text{H}_{33}\text{NNaO}_5\text{S}_2]^+$  ( $\text{M} + \text{Na}^+$ ) 634.1692, found 634.1693.

**(S)-6-methoxy-1-(1-tosylindolin-7-yl)naphthalen-2-yl trimethylbenzenesulfonate (2u)** **2,4,6-**

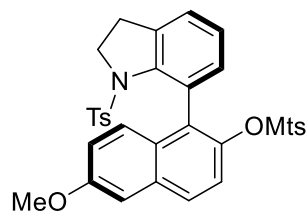

**2u**

Compound **2u** was prepared in 55% yield (48.8 mg) according to the general procedure at 50 °C as a pale yellow oil.  $[\alpha]_{\text{D}}^{20} = +2.3^\circ$  ( $c = 1.0$ ,  $\text{CHCl}_3$ ). 96% ee (determined by HPLC: Chiralpak ODH Column, 30/70  $i$ PrOH/hexane, 1.0 mL/min, 254 nm; TR = 7.61 min (minor), 10.46 min (major)).  $^1\text{H}$  NMR (400 MHz,  $\text{CDCl}_3$ )  $\delta$  7.67 (d,  $J = 8.8$  Hz, 1H), 7.64 (d,  $J = 9.2$  Hz, 1H), 7.23 (d,  $J = 8.4$  Hz, 2H), 7.17 – 7.10 (m, 6H), 7.04 (d,  $J = 8.0$  Hz, 2H), 6.87 (s, 2H), 4.08 – 4.01 (m, 1H), 3.90 (s, 3H), 3.80 – 3.72 (m, 1H), 2.50 – 2.44 (m, 2H), 2.40 (s, 6H), 2.34 (s, 3H), 2.30 (s, 3H);  $^{13}\text{C}$  NMR (100 MHz,  $\text{CDCl}_3$ )  $\delta$  157.4, 143.3, 143.1, 142.8, 141.9, 139.8, 137.6, 135.6, 133.3, 132.4, 131.8, 131.6, 130.3, 129.1, 128.2, 128.1, 127.8, 127.7, 127.1, 126.0, 124.4, 120.5, 119.3, 106.0, 55.3, 52.3, 29.4, 22.6, 21.5, 21.0; IR (neat): 2940 (bs), 1689, 1623, 1507, 1367, 1231, 1169, 829, 737, 673; HRESIMS Calcd for  $[\text{C}_{35}\text{H}_{33}\text{NNaO}_6\text{S}_2]^+$  ( $\text{M} + \text{Na}^+$ ) 650.1642, found 650.1639.



**(S)-7-bromo-1-(1-tosylindolin-7-yl)naphthalen-2-yl  
trimethylbenzenesulfonate (2v)**

**2,4,6-**

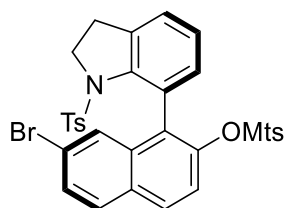

**2v**

Compound **2v** was prepared in 71% yield (48.8 mg) according to the general procedure at 50 °C as a pale yellow oil.  $[\alpha]_D^{20} = +107.6^\circ$  ( $c = 1.0$ ,  $\text{CHCl}_3$ ). 93% ee (determined by HPLC: Chiralpak ADH Column, 30/70  $i$ PrOH/hexane, 1.0 mL/min, 254 nm; TR = 8.58 min (minor), 11.05 min (major)).  $^1\text{H}$  NMR (400 MHz,  $\text{CDCl}_3$ )  $\delta$  7.85 (d,  $J = 1.6$  Hz, 1H), 7.75 – 7.70 (m, 2H), 7.53 (dd,  $J = 8.7, 1.9$  Hz, 1H), 7.26 – 7.22 (m, 3H), 7.19 – 7.11 (m, 3H), 7.05 (d,  $J = 8.1$  Hz, 2H), 6.89 (s, 2H), 4.08 – 4.01 (m, 1H), 3.85 – 3.78 (m, 1H), 2.50 – 2.44 (m, 1H), 2.43 (s, 6H), 2.34 (s, 3H), 2.31 (s, 3H), 2.29 – 2.27 (m, 1H);  $^{13}\text{C}$  NMR (100 MHz,  $\text{CDCl}_3$ )  $\delta$  145.2, 143.5, 143.3, 141.7, 139.8, 137.7, 135.3, 134.1, 132.4, 131.7, 131.6, 130.3, 129.8, 129.5, 129.2, 129.1, 128.6, 127.2, 126.9, 126.3, 124.8, 121.1, 120.5, 52.4, 29.2, 22.6, 21.5, 21.0; IR (neat): 2923 (bs), 1585, 1496, 1361, 1187, 953, 792, 679; HRESIMS Calcd for  $[\text{C}_{34}\text{H}_{30}\text{BrNNaO}_5\text{S}_2]^+$  ( $\text{M} + \text{Na}^+$ ) 698.0641, found 698.0640.

**(S)-7-phenyl-1-(1-tosylindolin-7-yl)naphthalen-2-yl  
trimethylbenzenesulfonate (2w)**

**2,4,6-**

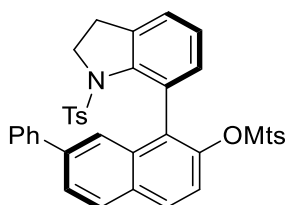

**2w**

Compound **2w** was prepared in 68% yield (48.8 mg) according to the general procedure at 50 °C as a pale yellow oil.  $[\alpha]_D^{20} = +100.2^\circ$  ( $c = 1.0$ ,  $\text{CHCl}_3$ ). 95% ee (determined by HPLC: Chiralpak ADH Column, 15/85  $i$ PrOH/hexane, 1.0 mL/min, 254 nm; TR =

15.44 min (major), 21.18 min (minor)). <sup>1</sup>H NMR (400 MHz, CDCl<sub>3</sub>) δ 7.93 – 7.89 (m, 2H), 7.77 (d, *J* = 8.8 Hz, 1H), 7.71 (d, *J* = 8.4 Hz, 1H), 7.56 (d, *J* = 7.2 Hz, 2H), 7.42 – 7.30 (m, 3H), 7.26 – 7.12 (m, 6H), 6.98 (d, *J* = 7.6 Hz, 2H), 6.89 (s, 2H), 4.11 – 4.05 (m, 1H), 3.85 – 3.78 (m, 1H), 2.56 – 2.50 (m, 2H), 2.43 (s, 6H), 2.31 (s, 3H), 2.30 (s, 3H); <sup>13</sup>C NMR (100 MHz, CDCl<sub>3</sub>) δ 144.8, 143.4, 143.2, 141.8, 141.3, 139.8, 139.2, 137.6, 135.6, 133.2, 132.5, 131.9, 131.6, 131.1, 130.4, 129.1, 128.8, 128.7, 128.6, 127.5, 127.3, 127.1, 126.1, 125.5, 124.7, 124.6, 120.0, 52.4, 29.4, 22.6, 21.5, 21.0; IR (neat): 2942 (bs), 1645, 1361, 1212, 1167, 972, 632, 580; HRESIMS Calcd for [C<sub>40</sub>H<sub>35</sub>NNaO<sub>5</sub>S<sub>2</sub>]<sup>+</sup> (M + Na<sup>+</sup>) 696.1849, found 696.1856.

**(S)-7-methyl-1-(1-tosylindolin-7-yl)naphthalen-2-yl** **2,4,6-**  
**trimethylbenzenesulfonate (2x)**

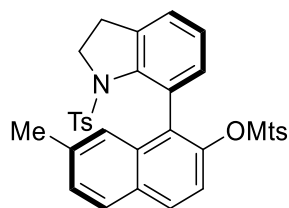

**2x**

Compound **2x** was prepared in 89% yield (48.8 mg) according to the general procedure at 50 °C as a pale yellow oil. [ $\alpha$ ]<sub>D</sub><sup>20</sup> = +161.7° (c = 1.0, CHCl<sub>3</sub>). 91% ee (determined by HPLC: Chiralpak ODH Column, 15/85 <sup>i</sup>PrOH/hexane, 1.0 mL/min, 254 nm; TR = 9.39 min (minor), 10.71 min (major)). <sup>1</sup>H NMR (400 MHz, CDCl<sub>3</sub>) δ 7.74 – 7.68 (m, 2H), 7.49 (s, 1H), 7.28 (dd, *J* = 8.4, 1.6 Hz, 1H), 7.24 – 7.09 (m, 6H), 7.02 (d, *J* = 8.0 Hz, 2H), 6.87 (s, 2H), 4.10 – 4.00 (m, 1H), 3.82 – 3.73 (m, 1H), 2.56 – 2.46 (m, 2H), 2.42 (s, 3H), 2.41 (s, 6H), 2.32 (s, 3H), 2.29 (s, 3H); <sup>13</sup>C NMR (100 MHz, CDCl<sub>3</sub>) δ 144.5, 143.3, 143.1, 141.8, 139.7, 137.5, 136.1, 135.6, 133.0, 132.5, 131.9, 131.6, 130.2, 129.4, 129.1, 128.8, 127.9, 127.8, 127.7, 127.1, 125.9, 125.4, 124.4, 118.9, 52.3, 29.4, 22.6, 22.1, 21.4, 21.0; IR (neat): 2947 (bs), 1632, 1598, 1360, 1167, 953, 796, 682; HRESIMS Calcd for [C<sub>35</sub>H<sub>33</sub>NNaO<sub>5</sub>S<sub>2</sub>]<sup>+</sup> (M + Na<sup>+</sup>) 634.1692, found 634.1698.

**(S)-7-methoxy-1-(1-tosylindolin-7-yl)naphthalen-2-yl** **2,4,6-**

**trimethylbenzenesulfonate (2y)**

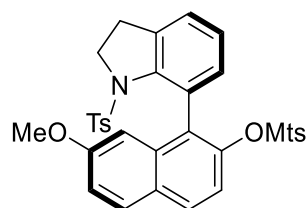

**2y**

Compound **2y** was prepared in 83% yield (48.8 mg) according to the general procedure at 50 °C as a pale yellow oil.  $[\alpha]_D^{20} = +135.2^\circ$  ( $c = 1.0$ ,  $\text{CHCl}_3$ ). 95% ee (determined by HPLC: Chiralpak ODH Column, 15/85 *i*PrOH/hexane, 1.0 mL/min, 254 nm; TR = 11.46 min (minor), 13.65 min (minor)).  $^1\text{H}$  NMR (400 MHz,  $\text{CDCl}_3$ )  $\delta$  7.73 (d,  $J = 8.8$  Hz, 1H), 7.66 (d,  $J = 9.2$  Hz, 1H), 7.25 – 7.22 (m, 3H), 7.17 – 7.11 (m, 3H), 7.06 – 6.99 (m, 4H), 6.89 (s, 2H), 4.09 – 4.02 (m, 1H), 3.83 – 3.78 (m, 1H), 3.75 (s, 3H), 2.59 – 2.47 (m, 2H), 2.43 (s, 6H), 2.33 (s, 3H), 2.30 (s, 3H);  $^{13}\text{C}$  NMR (100 MHz,  $\text{CDCl}_3$ )  $\delta$  158.1, 145.1, 143.3, 143.1, 141.8, 139.7, 137.6, 135.7, 134.3, 132.6, 131.7, 131.6, 129.5, 129.1, 129.0, 128.8, 127.8, 127.4, 127.0, 126.1, 124.5, 118.0, 117.4, 105.4, 55.1, 52.4, 29.4, 22.6, 21.5, 21.0; IR (neat): 2943 (bs), 1636, 1362, 1277, 1167, 803, 751, 676, 578; HRESIMS Calcd for  $[\text{C}_{35}\text{H}_{33}\text{NNaO}_6\text{S}_2]^+$  ( $\text{M} + \text{Na}^+$ ) 650.1642, found 650.1646.

**(S)-1-(1-tosylindolin-7-yl)-5,6,7,8-tetrahydronaphthalen-2-yl**  
**trimethylbenzenesulfonate (2z)**

**2,4,6-**

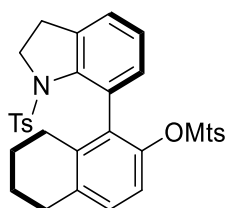

**2z**

Compound **2z** was prepared in 42% yield (48.8 mg) according to the general procedure at 50 °C as a pale yellow oil.  $[\alpha]_D^{20} = -9.9^\circ$  ( $c = 1.0$ ,  $\text{CHCl}_3$ ). 97% ee (determined by HPLC: Chiralpak ADH Column, 30/70 *i*PrOH/hexane, 1.0 mL/min, 254 nm; TR = 5.75 min (major), 8.02 min (minor)).  $^1\text{H}$  NMR (400 MHz,  $\text{CDCl}_3$ )  $\delta$  7.34 (d,  $J = 8.0$  Hz, 2H), 7.19 – 7.11 (m, 2H), 7.07 – 7.02 (m, 3H), 6.94 (d,  $J = 8.4$  Hz, 1H), 6.91 (s, 2H), 6.66

(d,  $J = 8.4$  Hz, 1H), 3.97 – 3.83 (m, 2H), 2.80 – 2.76 (m, 2H), 2.69 – 2.61 (m, 1H), 2.48 (s, 6H), 2.46 – 2.37 (m, 2H), 2.35 (s, 3H), 2.31 (s, 3H), 2.24 – 2.15 (m, 1H), 1.80 – 1.68 (m, 4H);  $^{13}\text{C}$  NMR (100 MHz,  $\text{CDCl}_3$ )  $\delta$  145.6, 143.4, 143.0, 141.3, 139.6, 137.5, 137.3, 135.4, 133.1, 132.8, 131.6, 131.2, 129.2, 129.1, 129.0, 127.3, 126.2, 124.0, 117.1, 52.4, 29.5, 29.2, 27.8, 22.9, 22.5, 21.5, 21.0; IR (neat): 2939 (bs), 1635, 1466, 1361, 1169, 788, 736, 560; HRESIMS Calcd for  $[\text{C}_{34}\text{H}_{35}\text{NNaO}_5\text{S}_2]^+$  ( $\text{M} + \text{Na}^+$ ) 624.1849, found 624.1858.

**(S)-1-(1-((4-(*tert*-butyl)phenyl)sulfonyl)indolin-7-yl)naphthalen-2-yl trifluoromethanesulfonate (2aa)**

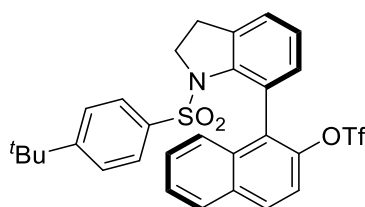

**2aa**

Compound **2aa** was prepared in 77% yield (48.8 mg) according to the general procedure at 40 °C as a pale yellow oil.  $[\alpha]_{\text{D}}^{20} = -1.5^\circ$  ( $c = 1.0$ ,  $\text{CHCl}_3$ ). 96% ee (determined by HPLC: Chiralpak ODH Column, 30/70 *i*PrOH/hexane, 1.0 mL/min, 254 nm; TR = 4.34 min (minor), 4.86 min (major)).  $^1\text{H}$  NMR (400 MHz,  $\text{CDCl}_3$ )  $\delta$  7.98 – 7.95 (m, 1H), 7.92 – 7.90 (m, 1H), 7.88 (d,  $J = 9.2$  Hz, 1H), 7.57 – 7.53 (m, 2H), 7.35 (d,  $J = 9.2$  Hz, 1H), 7.32 – 7.26 (m, 7H), 4.20 – 4.14 (m, 1H), 4.04 – 3.97 (m, 1H), 2.56 – 2.38 (m, 2H), 1.29 (s, 9H);  $^{13}\text{C}$  NMR (100 MHz,  $\text{CDCl}_3$ )  $\delta$  156.7, 144.1, 142.1, 138.3, 135.3, 133.2, 132.6, 132.0, 130.6, 130.0, 128.2, 127.2, 126.9, 126.6, 126.2, 125.6, 125.3, 118.9, 118.4 (q,  $J = 320.4$  Hz), 52.4, 35.1, 31.0, 29.3;  $^{19}\text{F}$  NMR (376 MHz,  $\text{CDCl}_3$ )  $\delta$  -74.5; IR (neat): 2950 (bs), 1419, 1400, 1213, 1170, 1142, 950, 839, 584; HRESIMS Calcd for  $[\text{C}_{29}\text{H}_{26}\text{F}_3\text{NNaO}_5\text{S}_2]^+$  ( $\text{M} + \text{Na}^+$ ) 612.1097, found 612.1094.

**(S)-1-(1-((4-nitrophenyl)sulfonyl)indolin-7-yl)naphthalen-2-yl trifluoromethanesulfonate (2ab)**

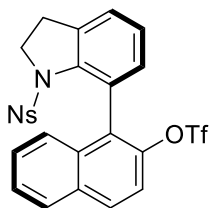

**2ab**

Compound **2ab** was prepared in 54% yield (48.8 mg) according to the general procedure at 40 °C as a pale yellow oil.  $[\alpha]_D^{20} = +261.1^\circ$  ( $c = 1.0$ ,  $\text{CHCl}_3$ ). 95% ee (determined by HPLC: Chiralpak IG Column, 15/85 *i*PrOH/hexane, 1.0 mL/min, 254 nm; TR = 10.38 min (major), 12.07 min (minor)).  $^1\text{H}$  NMR (400 MHz,  $\text{CDCl}_3$ )  $\delta$  8.10 – 8.06 (m, 2H), 7.92 – 7.86 (m, 3H), 7.59 – 7.55 (m, 2H), 7.47 – 7.44 (m, 2H), 7.36 – 7.30 (m, 4H), 4.33 – 4.27 (m, 1H), 4.16 – 4.08 (m, 1H), 2.75 – 2.61 (m, 2H);  $^{13}\text{C}$  NMR (100 MHz,  $\text{CDCl}_3$ )  $\delta$  149.9, 144.2, 141.3, 137.7, 132.8, 132.6, 132.2, 130.3, 129.9, 128.3, 127.9, 127.5, 126.9, 126.5, 125.9, 125.8, 123.7, 118.8, 118.4 (q,  $J = 320.6$  Hz), 52.8, 29.6;  $^{19}\text{F}$  NMR (376 MHz,  $\text{CDCl}_3$ )  $\delta$  -74.4; IR (neat): 2945 (bs), 1533, 1355, 1156, 1099, 954, 808, 772, 680; HRESIMS Calcd for  $[\text{C}_{25}\text{H}_{17}\text{F}_3\text{N}_2\text{NaO}_7\text{S}_2]^+$  ( $\text{M} + \text{Na}^+$ ) 601.0321, found 601.0327.

**(S)-8-methyl-1-(1-tosylindolin-7-yl)naphthalen-2-yl trifluoromethanesulfonate**  
**(2ac)**

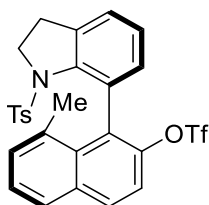

**2ac**

Compound **2ac** was prepared in 69% yield (48.8 mg) according to the general procedure at 40 °C as a pale yellow oil.  $[\alpha]_D^{20} = +48.5^\circ$  ( $c = 1.0$ ,  $\text{CHCl}_3$ ). 95% ee (determined by HPLC: Chiralpak IA Column, 15/85 *i*PrOH/hexane, 1.0 mL/min, 254 nm; TR = 6.63 min (major), 7.60 min (minor)).  $^1\text{H}$  NMR (400 MHz,  $\text{CDCl}_3$ )  $\delta$  7.90 (d,  $J = 9.2$  Hz, 1H), 7.77 (d,  $J = 8.0$  Hz, 1H), 7.45 – 7.41 (m, 1H), 7.36 – 7.32 (m, 4H), 7.27 – 7.25 (m, 1H), 7.24 – 7.21 (m, 2H), 7.12 (d,  $J = 8.0$  Hz, 2H), 4.09 – 3.96 (m, 2H), 2.66 – 2.58 (m, 1H),

2.51 – 2.44 (m, 1H), 2.38 (s, 3H), 2.27 (s, 3H);  $^{13}\text{C}$  NMR (100 MHz,  $\text{CDCl}_3$ )  $\delta$  146.0, 143.6, 141.8, 137.9, 136.4, 136.0, 134.1, 132.5, 132.0, 131.4, 131.3, 130.4, 129.4, 129.3, 127.7, 127.1, 126.3, 125.5, 125.3, 118.4 (q,  $J = 320.1$  Hz), 118.0, 52.7, 29.4, 24.7, 21.5;  $^{19}\text{F}$  NMR (376 MHz,  $\text{CDCl}_3$ )  $\delta$  -74.6; IR (neat): 2947 (bs), 1699, 1422, 1370, 1216, 1170, 837, 524; HRESIMS Calcd for  $[\text{C}_{27}\text{H}_{22}\text{F}_3\text{NNaO}_5\text{S}_2]^+$  ( $\text{M} + \text{Na}^+$ ) 584.0784, found 584.0781.

**(S)-8-phenyl-1-(1-tosylindolin-7-yl)naphthalen-2-yl trifluoromethanesulfonate (2ad)**

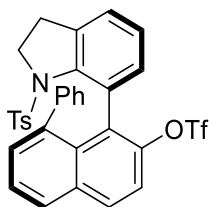

**2ad**

Compound **2ad** was prepared in 65% yield (48.8 mg) according to the general procedure at 40 °C as a pale yellow oil.  $[\alpha]_{\text{D}}^{20} = +70.5^\circ$  ( $c = 1.0$ ,  $\text{CHCl}_3$ ). 60% ee (determined by HPLC: Chiralpak IA Column, 30/70  $i$ PrOH/hexane, 1.0 mL/min, 254 nm; TR = 4.90 min (minor), 6.25 min (major)).  $^1\text{H}$  NMR (400 MHz,  $\text{CDCl}_3$ )  $\delta$  8.04 (d,  $J = 9.2$  Hz, 1H), 7.93 (d,  $J = 8.0$  Hz, 1H), 7.63 (d,  $J = 9.2$  Hz, 1H), 7.55 – 7.51 (m, 1H), 7.37 – 7.22 (m, 3H), 7.22 (d,  $J = 6.8$  Hz, 2H), 7.10 – 7.06 (m, 1H), 7.03 – 6.91 (m, 3H), 6.89 – 6.85 (m, 1H), 6.76 – 6.66 (m, 3H), 3.85 – 3.79 (m, 1H), 3.68 – 3.60 (m, 1H), 2.29 (s, 3H), 2.06 – 2.01 (m, 1H), 1.96 – 1.87 (m, 1H);  $^{13}\text{C}$  NMR (100 MHz,  $\text{CDCl}_3$ )  $\delta$  147.7, 143.6, 141.8, 140.9, 140.4, 137.0, 134.8, 133.7, 132.8, 132.7, 131.9, 131.3, 131.1, 130.1, 129.1, 128.9, 128.2, 127.6, 127.2, 126.5, 126.2, 125.7, 125.1, 118.8, 118.3 (q,  $J = 319.9$  Hz), 51.6, 28.0, 21.4;  $^{19}\text{F}$  NMR (376 MHz,  $\text{CDCl}_3$ )  $\delta$  -73.7; IR (neat): 2940 (bs), 1635, 1417, 1215, 1169, 1142, 705, 599, 564; HRESIMS Calcd for  $[\text{C}_{32}\text{H}_{24}\text{F}_3\text{NNaO}_5\text{S}_2]^+$  ( $\text{M} + \text{Na}^+$ ) 646.0940, found 646.0945.

**(S)-10-(1-tosylindolin-7-yl)phenanthren-9-yl trifluoromethanesulfonate (2ae)**

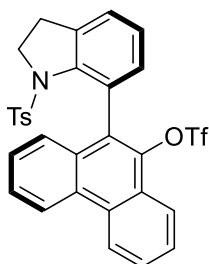

**2ae**

Compound **2ae** was prepared in 73% yield (43.6 mg) according to the general procedure at 40 °C as a pale yellow oil.  $[\alpha]_D^{20} = +256.3$  ( $c = 1.0$ ,  $\text{CHCl}_3$ ). 90% ee (determined by HPLC: Chiralpak ODH Column, 15/85 *i*-PrOH/hexane, 1.0 mL/min, 254 nm; TR = 8.66 min (minor), 9.57 min (major)).  $^1\text{H NMR}$  (400 MHz,  $\text{CDCl}_3$ )  $\delta$  8.73 (d,  $J = 8.4$  Hz, 2H), 8.10 (d,  $J = 8.4$  Hz, 1H), 8.03 (d,  $J = 8.0$  Hz, 1H), 7.75 – 7.71 (m, 2H), 7.68 – 7.63 (m, 2H), 7.38 – 7.35 (m, 1H), 7.32 – 7.30 (m, 2H), 7.07 (d,  $J = 8.0$  Hz, 2H), 6.87 (d,  $J = 8.0$  Hz, 2H), 4.37 – 4.32 (m, 1H), 4.03 – 3.95 (m, 1H), 2.68 – 2.59 (m, 2H), 2.21 (s, 3H);  $^{13}\text{C NMR}$  (100 MHz,  $\text{CDCl}_3$ )  $\delta$  143.3, 142.5, 140.7, 138.4, 135.8, 132.7, 131.6, 129.9, 129.5, 129.0, 128.2, 127.8, 127.4, 127.2, 126.4, 126.2, 125.9, 125.5, 125.3, 122.8, 122.7, 122.4, 118.2 (q,  $J = 320.4$  Hz), 52.5, 29.8, 21.4;  $^{19}\text{F NMR}$  (376 MHz,  $\text{CDCl}_3$ )  $\delta$  -73.7; IR (neat): 2924 (bs), 1598, 1417, 1358, 1137, 975, 828, 734; HRESIMS Calcd for  $[\text{C}_{30}\text{H}_{22}\text{F}_3\text{NNaO}_5\text{S}_2]^+$  ( $\text{M} + \text{Na}^+$ ) 620.0784, found 620.0786.

**(S)-1-(1-tosylindolin-7-yl)-5,6,7,8-tetrahydronaphthalen-2-yl trifluoromethanesulfonate (2af)**

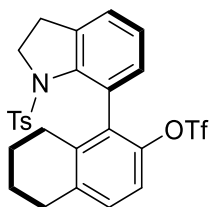

**2af**

Compound **2af** was prepared in 53% yield (48.8 mg) according to the general procedure at 40 °C as a pale yellow oil.  $[\alpha]_D^{20} = +98.5^\circ$  ( $c = 1.0$ ,  $\text{CHCl}_3$ ). 98% ee (determined by HPLC: Chiralpak ADH Column, 10/90 *i*-PrOH/hexane, 1.0 mL/min, 254 nm; TR = 6.95 min (minor), 7.80 min (major)).  $^1\text{H NMR}$  (400 MHz,  $\text{CDCl}_3$ )  $\delta$  7.34 (d,  $J = 8.0$  Hz, 2H),

7.22 – 7.10 (m, 6H), 7.04 (d,  $J = 8.4$  Hz, 1H), 4.06 – 3.94 (m, 2H), 2.90 – 2.81 (m, 2H), 2.76 – 2.61 (m, 2H), 2.38 (s, 3H), 2.35 – 2.27 (m, 2H), 1.86 – 1.73 (m, 4H);  $^{13}\text{C}$  NMR (100 MHz,  $\text{CDCl}_3$ )  $\delta$  145.2, 143.8, 141.4, 138.7, 138.1, 137.5, 135.3, 132.6, 131.0, 129.6, 129.3, 127.9, 127.3, 126.4, 124.8, 118.3 (q,  $J = 320.1$  Hz), 117.4, 52.4, 29.6, 29.1, 28.3, 22.7, 22.4, 21.5;  $^{19}\text{F}$  NMR (376 MHz,  $\text{CDCl}_3$ )  $\delta$  -74.6; IR (neat): 2945 (bs), 1694, 1422, 1377, 1150, 974, 836, 707, 534; HRESIMS Calcd for  $[\text{C}_{26}\text{H}_{24}\text{F}_3\text{NNaO}_5\text{S}_2]^+$  ( $\text{M} + \text{Na}^+$ ) 574.0940, found 574.0942.

**(S)-7-(2-iodonaphthalen-1-yl)-1-tosylindoline (2ag)**

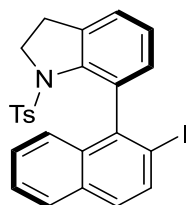

**2ag**

Compound **2ag** was prepared in 79% yield (48.8 mg) according to the general procedure at 40 °C as a pale yellow oil.  $[\alpha]_{\text{D}}^{20} = +34.6^\circ$  ( $c = 1.0$ ,  $\text{CHCl}_3$ ). 25% ee (determined by HPLC: Chiralpak ADH Column, 30/70  $i$ PrOH/hexane, 1.0 mL/min, 254 nm; TR = 6.65 min (minor), 7.54 min (major)).  $^1\text{H}$  NMR (400 MHz,  $\text{CDCl}_3$ )  $\delta$  7.86 (d,  $J = 8.8$  Hz, 1H), 7.80 (d,  $J = 8.0$  Hz, 1H), 7.68 (d,  $J = 8.4$  Hz, 1H), 7.49 – 7.45 (m, 2H), 7.41 – 7.38 (m, 1H), 7.29 – 7.26 (m, 4H), 7.16 – 7.14 (m, 1H), 7.05 (d,  $J = 8.0$  Hz, 2H), 4.20 – 4.04 (m, 2H), 2.69 – 2.61 (m, 1H), 2.57 – 2.50 (m, 1H), 2.35 (s, 3H);  $^{13}\text{C}$  NMR (100 MHz,  $\text{CDCl}_3$ )  $\delta$  143.2, 142.2, 141.5, 138.2, 136.0, 135.6, 134.9, 133.2, 132.8, 131.4, 129.1, 128.8, 127.9, 127.3, 127.0, 126.3, 126.1, 126.0, 124.8, 99.0, 52.5, 29.7, 21.5; IR (neat): 2945 (bs), 1645, 1355, 1176, 1123, 884, 790, 584, 533; HRESIMS Calcd for  $[\text{C}_{25}\text{H}_{20}\text{INNaO}_2\text{S}]^+$  ( $\text{M} + \text{Na}^+$ ) 548.0152, found 548.0149.

**(S)-7-(2-isopropyl-naphthalen-1-yl)-1-tosylindoline (2ah)**



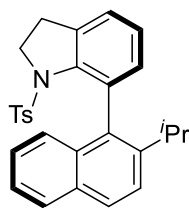

**2ah**

Compound **2ah** was prepared in 72% yield (48.8 mg) according to the general procedure at 40 °C as a pale yellow oil.  $[\alpha]_D^{20} = -43.8^\circ$  ( $c = 1.0$ ,  $\text{CHCl}_3$ ). 35% ee (determined by HPLC: Chiralpak ADH Column, 15/85 *i*PrOH/hexane, 1.0 mL/min, 254 nm; TR = 5.04 min (minor), 6.10 min (major)).  $^1\text{H}$  NMR (400 MHz,  $\text{CDCl}_3$ )  $\delta$  7.81 – 7.75 (m, 2H), 7.56 (dd,  $J = 8.4, 7.6$  Hz, 1H), 7.48 (d,  $J = 8.8$  Hz, 1H), 7.38 – 7.29 (m, 2H), 7.23 – 7.20 (m, 2H), 7.17 – 7.14 (m, 1H), 7.03 – 6.95 (m, 4H), 4.13 – 4.07 (m, 1H), 4.00 – 3.93 (m, 1H), 2.94 – 2.87 (m, 1H), 2.73 – 2.64 (m, 2H), 2.31 (s, 3H), 1.31 (d,  $J = 6.8$  Hz, 3H), 1.09 (d,  $J = 6.8$  Hz, 3H);  $^{13}\text{C}$  NMR (100 MHz,  $\text{CDCl}_3$ )  $\delta$  143.5, 142.9, 142.3, 137.6, 136.2, 134.2, 132.4, 132.0, 131.9, 131.8, 129.0, 128.0, 127.7, 126.8, 126.7, 125.9, 125.3, 124.5, 124.0, 123.8, 52.7, 30.8, 30.0, 25.2, 22.4, 21.4; IR (neat): 2962 (bs), 1644, 1361, 1279, 1166, 819, 724, 672; HRESIMS Calcd for  $[\text{C}_{28}\text{H}_{27}\text{NNaO}_2\text{S}]^+$  ( $\text{M} + \text{Na}^+$ ) 464.1655, found 464.1654.

**(S)-7-(2-phenylnaphthalen-1-yl)-1-tosylindoline (2ai)**

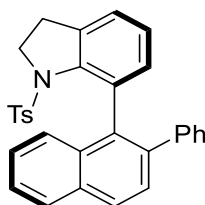

**2ai**

Compound **2ai** was prepared in 76% yield (48.8 mg) according to the general procedure at 40 °C as a pale yellow oil.  $[\alpha]_D^{20} = +461.2^\circ$  ( $c = 1.0$ ,  $\text{CHCl}_3$ ). 46% ee (determined by HPLC: Chiralpak ADH Column, 15/85 *i*PrOH/hexane, 1.0 mL/min, 254 nm; TR = 8.98 min (minor), 11.20 min (major)).  $^1\text{H}$  NMR (400 MHz,  $\text{CDCl}_3$ )  $\delta$  8.14 – 8.12 (m, 1H), 7.92 – 7.89 (m, 2H), 7.53 – 7.48 (m, 2H), 7.45 (d,  $J = 8.4$  Hz, 1H), 7.39 (d,  $J = 7.6$  Hz, 1H), 7.21 – 7.18 (m, 1H), 7.11 – 7.01 (m, 8H), 6.92 – 6.89 (m, 2H), 3.78 – 3.72 (m,

1H), 2.45 – 2.37 (m, 1H), 2.32 (s, 3H), 2.29 – 2.20 (m, 1H), 2.14 – 2.09 (m, 1H); <sup>13</sup>C NMR (100 MHz, CDCl<sub>3</sub>) δ 143.1, 142.6, 141.7, 138.1, 137.8, 135.9, 135.2, 133.0, 132.7, 132.2, 132.1, 129.9, 129.0, 128.2, 127.9, 127.7, 127.1, 127.0, 125.9, 125.6, 125.5, 125.4, 123.8, 51.6, 29.2, 21.5; IR (neat): 2940 (bs), 1417, 1215, 1169, 1142, 705, 599, 565; HRESIMS Calcd for [C<sub>31</sub>H<sub>25</sub>NNaO<sub>2</sub>S]<sup>+</sup> (M + Na<sup>+</sup>) 498.1498, found 498.1494.

### 3-methoxy-2-(1-tosylindolin-7-yl)phenyl 2,4,6-trimethylbenzenesulfonate (2aj)

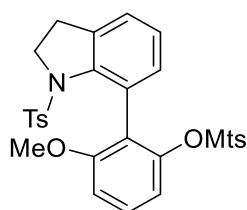

**2aj**

Compound **2aj** was prepared in 30% yield (40.3 mg) according to the general procedure at 40 °C as a pale yellow oil. <5% ee (determined by HPLC: Chiralpak ODH Column, 30/70 <sup>i</sup>PrOH/hexane, 1.0 mL/min, 254 nm; TR = 7.65 min, 8.86 min) <sup>1</sup>H NMR (400 MHz, CDCl<sub>3</sub>) δ 7.34 (d, *J* = 8.0 Hz, 2H), 7.25 – 7.21 (m, 1H), 7.14 (d, *J* = 7.6 Hz, 1H), 7.09 – 7.04 (m, 3H), 6.97 (d, *J* = 7.2 Hz, 1H), 6.90 (d, *J* = 8.4 Hz, 1H), 6.87 (s, 2H), 6.68 (d, *J* = 8.4 Hz, 1H), 4.05 – 3.98 (m, 1H), 3.83 (s, 3H), 3.77 – 3.69 (m, 1H), 2.41 (s, 6H), 2.34 (s, 3H), 2.30 (s, 3H), 2.24 – 2.21 (m, 2H); <sup>13</sup>C NMR (100 MHz, CDCl<sub>3</sub>) δ 158.4, 147.5, 143.4, 143.0, 141.3, 139.8, 137.1, 135.4, 132.5, 131.5, 129.1, 128.6, 127.4, 126.4, 125.9, 124.0, 123.7, 113.6, 109.4, 56.3, 52.3, 29.0, 22.6, 21.5, 21.0; IR (neat): 2940 (bs), 1635, 1361, 1195, 1167, 614, 580, 492; HRESIMS Calcd for [C<sub>31</sub>H<sub>31</sub>NNaO<sub>6</sub>S<sub>2</sub>]<sup>+</sup> (M + Na<sup>+</sup>) 600.1485, found 600.1489.

## 5. Racemization Experiments

Since the configurational stability of axially chiral 7-aryl indolines is one of the key factors for their utility, the racemization experiments of selected compounds were performed at 100 °C.

Compound **2a**, **2o**, **2ac** or **2af** (1 mg) was dissolved in toluene (1 mL) and stirred at 100 °C for 10–30 h. At given interval of time, small samples (20 µL) of this solution were removed via syringe, diluted by *i*PrOH (0.5 mL) and subjected into the HPLC to measure the enantiomeric excess. Importantly, 5,6,7,8-tetrahydronaphthyl product **2af** demonstrated highest rotational barrier (129.43 kJ/mol) and longest half-life at 100 °C (16.5 h). Thus, the steric effect of different substituents on naphthalene rings is crucial, and details are given below.

Compound **2a**: solvent: toluene; temperature: 373K.

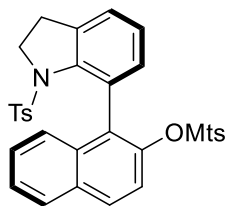

| t (s) | ee of <b>2a</b> (%) | ln(ee <sub>0</sub> /ee <sub>t</sub> ) |
|-------|---------------------|---------------------------------------|
| 0     | 93.92               | 0                                     |
| 1800  | 70.34               | 0.2891027                             |
| 3600  | 52.48               | 0.5820112                             |
| 7200  | 32.3                | 1.0673761                             |
| 10800 | 19.36               | 1.5792343                             |
| 18000 | 5.46                | 2.8449946                             |
| 36000 | 1.26                | 4.3113316                             |

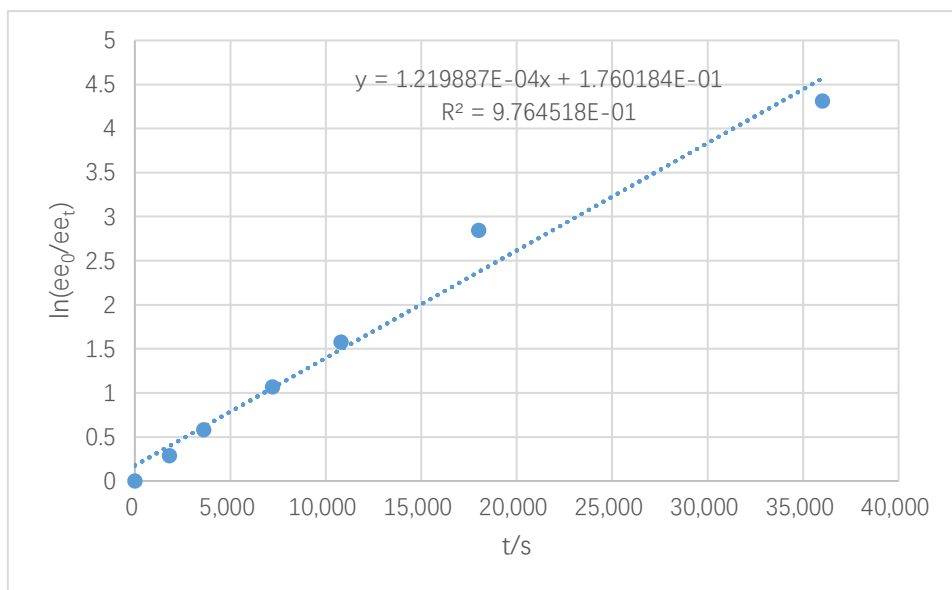

$K_{\text{racemization}} = 0.0001219887$

$K_{\text{enantiomerization}} = 0.0000609944$

$t_{1/2} = 1.6 \text{ h}$

$\Delta G^\ddagger = 122.14 \text{ kJ/mol}$

Compound **2o**: solvent: toluene; temperature: 373K.

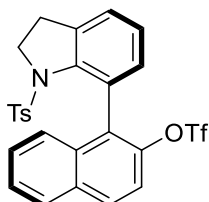

| t (s) | ee of <b>2o</b> (%) | ln(ee₀/eeₜ) |
|-------|---------------------|-------------|
| 0     | 94.5                | 0           |
| 1800  | 70.3                | 0.295828    |
| 3600  | 55.14               | 0.5387244   |
| 7200  | 35.1                | 0.9903987   |
| 10800 | 23.46               | 1.393303    |
| 18000 | 10.18               | 2.2281748   |
| 36000 | 1.38                | 4.2265163   |

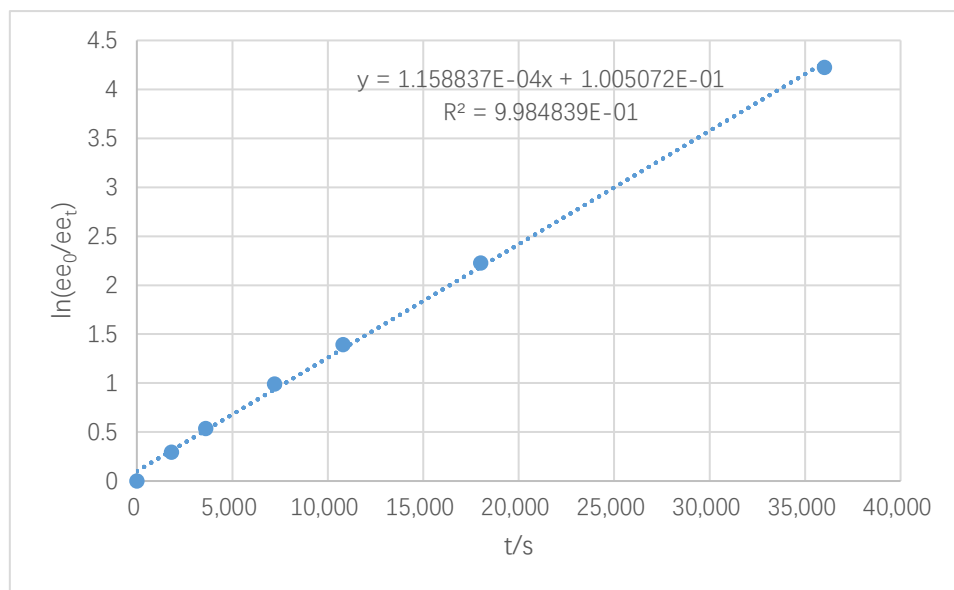

$$K_{\text{racemization}} = 0.0001158837$$

$$K_{\text{enantiomerization}} = 0.0000579419$$

$$t_{1/2} = 1.7 \text{ h}$$

$$\Delta G_{\ddagger} = 122.31 \text{ kJ/mol}$$

Compound **2ac**: solvent: toluene; temperature: 373K.

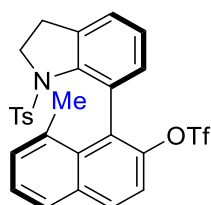

| t (s) | ee of <b>2ae</b> (%) | ln(ee <sub>0</sub> /ee <sub>t</sub> ) |
|-------|----------------------|---------------------------------------|
| 0     | 95.04                | 0                                     |
| 1800  | 80.04                | 0.1717713                             |
| 3600  | 55.38                | 0.5400793                             |
| 7200  | 41.3                 | 0.8334354                             |
| 10800 | 21.96                | 1.4650752                             |
| 18000 | 6.52                 | 2.6794235                             |
| 36000 | 0.56                 | 5.1341164                             |

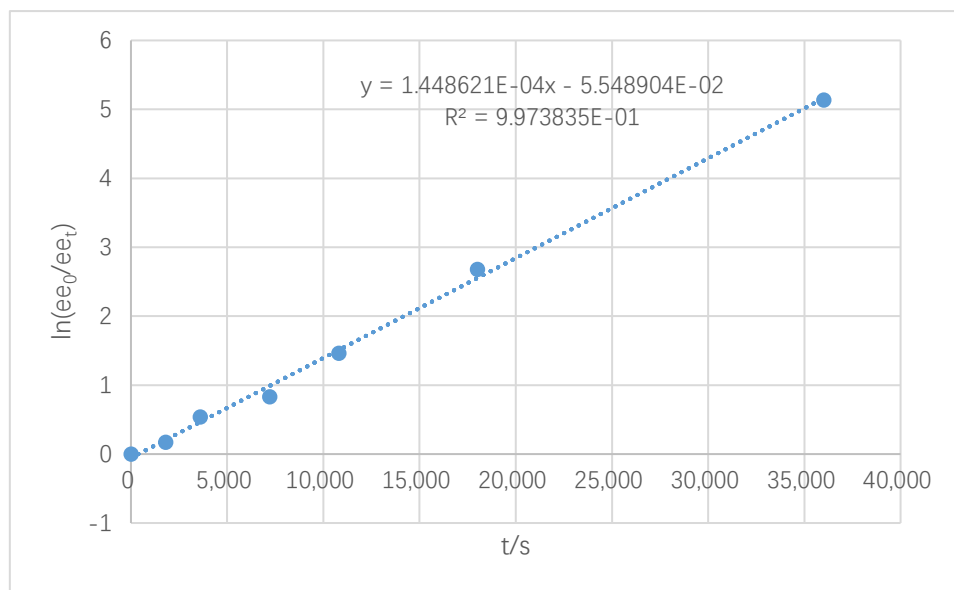

$K_{\text{racemization}} = 0.0001448621$

$K_{\text{enantiomerization}} = 0.0000724311$

$t_{1/2} = 1.3 \text{ h}$

$\Delta G^\ddagger = 121.60 \text{ kJ/mol}$

Compound **2af**: solvent: toluene; temperature: 373K.

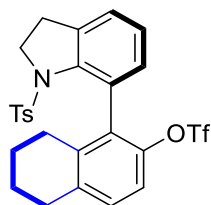

| t (s)  | ee of <b>2af</b> (%) | ln(ee₀/eeₜ) |
|--------|----------------------|-------------|
| 0      | 98.58                | 0           |
| 1800   | 96.8                 | 0.0182214   |
| 3600   | 94.06                | 0.0469355   |
| 7200   | 90.66                | 0.0837522   |
| 10800  | 83.7                 | 0.1636294   |
| 18000  | 79.62                | 0.2136031   |
| 36000  | 64.84                | 0.4189457   |
| 72000  | 34.32                | 1.0551401   |
| 108000 | 31.08                | 1.1543039   |

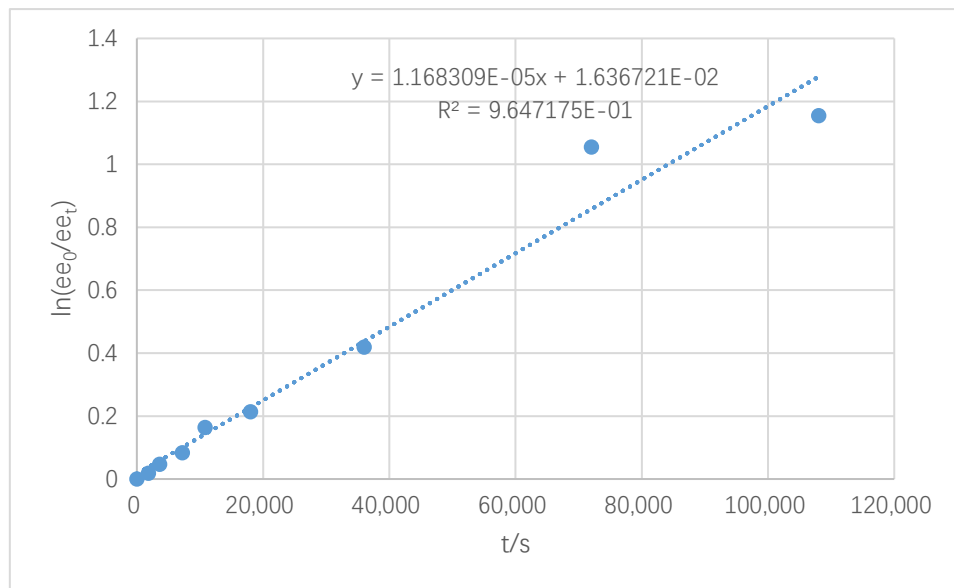

$K_{\text{racemization}} = 0.00001168309$

$K_{\text{enantiomerization}} = 0.00000584155$

$t_{1/2} = 16.5 \text{ h}$

$\Delta G^\ddagger = 129.43 \text{ kJ/mol}$

## 6. Synthetic Utility Study

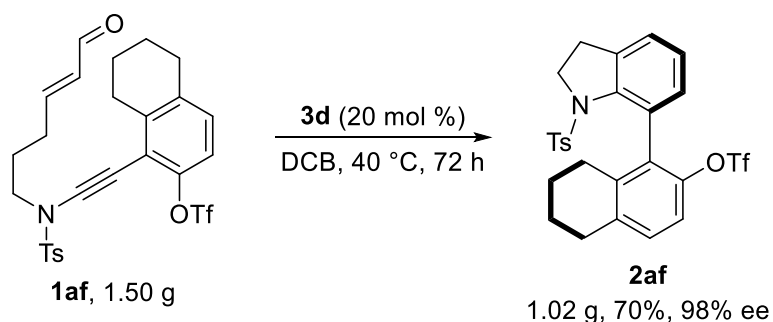

To a 50 mL vial charged with a stir bar were added ynamide **1af** (1.50 g, 2.63 mmol), 1,2-dichlorobenzene (26 mL) and chiral secondary amine catalyst **3d** (0.53 mmol, 268 mg) sequentially. The reaction mixture was stirred at 40 °C for 72 h, and the progress of the reaction was monitored by TLC. Upon completion, the reaction mixture was directly purified by column chromatography on silica gel (eluent: PE/EtOAc= 6/1) to afford the desired **2af** in 70% yield with 98% ee (1.02 g).

### (*S*)-diphenyl(1-(1-tosylindolin-7-yl)-5,6,7,8-tetrahydronaphthalen-2-yl)phosphine oxide (**4**)

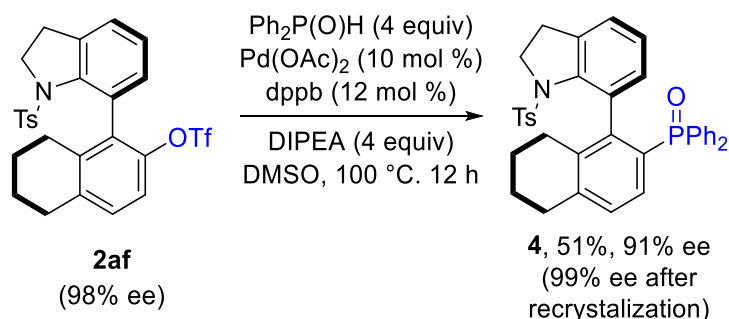

Compound **4** was prepared according to the known procedure (2 mmol scale)<sup>1</sup> in 51% yield (615 mg) as a white solid (mp 241–243 °C).  $[\alpha]_{\text{D}}^{20} = +127.1^\circ$  ( $c = 1.0$ ,  $\text{CHCl}_3$ ). 91% ee (determined by HPLC: Chiralpak ODH Column, 10/90 *i*-PrOH/hexane, 1.0 mL/min, 254 nm; TR = 5.48 min (minor), 6.04 min (major)). <sup>1</sup>H NMR (400 MHz,  $\text{CDCl}_3$ )  $\delta$  7.78 (d,  $J = 8.1$  Hz, 2H), 7.65 – 7.58 (m, 2H), 7.53 – 7.31 (m, 8H), 7.16 (d,  $J = 8.1$  Hz, 2H), 6.98 (d,  $J = 7.0$  Hz, 2H), 6.91 – 6.79 (m, 2H), 6.62 (d,  $J = 7.6$  Hz, 1H), 3.98 – 3.84 (m, 2H), 2.91 – 2.76 (m, 3H), 2.34 (s, 3H), 2.37 – 2.27 (m, 2H), 2.22 – 2.13 (m, 1H), 1.84 – 1.76 (m, 3H), 1.70 – 1.65 (m, 1H); <sup>13</sup>C NMR (100 MHz,  $\text{CDCl}_3$ )  $\delta$  144.2 (d,  $J = 6.7$  Hz), 142.9, 141.3, 141.1 (d,  $J = 2.3$  Hz), 137.8 (d,  $J = 10.0$  Hz), 137.3, 135.9,



135.4, 134.4, 132.2, 132.1, 131.7 (d,  $J = 9.3$  Hz), 130.9, 130.7 (d,  $J = 13.6$  Hz), 130.5, 129.3, 129.2, 128.0, 127.9 (d,  $J = 8.2$  Hz), 127.6, 127.2 (d,  $J = 14.0$  Hz), 126.6, 125.0, 123.8, 52.3, 30.2, 28.9, 27.6, 23.1, 22.4, 21.4;  $^{31}\text{P}$  NMR (162 MHz,  $\text{CDCl}_3$ )  $\delta$  30.1; IR (neat): 2934 (bs), 1598, 1436, 1356, 1167, 909, 701, 539; HRESIMS Calcd for  $[\text{C}_{37}\text{H}_{34}\text{NNaO}_3\text{PS}]^+$  ( $\text{M} + \text{Na}^+$ ) 626.1889, found 626.1897.

**(*S*)-7-(2-(diphenylphosphanyl)-5,6,7,8-tetrahydronaphthalen-1-yl)-1-tosylindoline (**5**)**

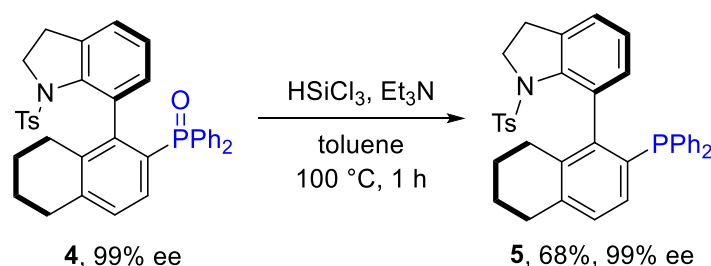

Compound **5** was prepared according to the known procedure (1 mmol scale)<sup>5</sup> in 68% yield (400 mg). The product was isolated through neutral  $\text{Al}_2\text{O}_3$  column chromatography (PE/EA = 30/1) as a white solid (mp 204–206 °C).  $[\alpha]_{\text{D}}^{20} = +76.5^\circ$  ( $c = 1.0$ ,  $\text{CHCl}_3$ ). 99% ee (determined by HPLC: Chiralpak IA Column, 20/80 *i*-PrOH/hexane, 1.0 mL/min, 254 nm; TR = 4.30 min (major), 5.20 min (minor)).  $^1\text{H}$  NMR (400 MHz,  $\text{CDCl}_3$ ) 7.54 (d,  $J = 7.6$  Hz, 2H), 7.31 – 7.24 (m, 5H), 7.24 – 7.14 (m, 5H), 7.13 (d,  $J = 8.0$  Hz, 2H), 7.05 (d,  $J = 7.2$  Hz, 1H), 7.00 (d,  $J = 8.0$  Hz, 1H), 6.90 – 6.87 (m, 2H), 6.63 (d,  $J = 7.6$  Hz, 1H), 4.07 – 4.00 (m, 1H), 3.95 – 3.88 (m, 1H), 2.81 (t,  $J = 4.8$  Hz, 2H), 2.76 – 2.71 (m, 1H), 2.47 – 2.39 (m, 1H), 2.37 (s, 3H), 2.34 – 2.28 (m, 2H), 1.78 – 1.70 (m, 3H), 1.68 – 1.63 (m, 1H);  $^{13}\text{C}$  NMR (100 MHz,  $\text{CDCl}_3$ )  $\delta$  145.7, 145.4, 143.2, 140.9, 138.2, 137.5, 136.1, 135.7 (d,  $J = 6.0$  Hz), 134.2, 134.0, 133.2, 133.1, 131.6, 131.4 (d,  $J = 3.3$  Hz), 129.3, 128.5, 128.2, 128.1, 128.0 (d,  $J = 5.4$  Hz), 127.6 (d,  $J = 4.3$  Hz), 127.4, 125.4, 123.9, 52.5, 30.1, 29.4, 27.8, 23.3, 22.7, 21.5.  $^{31}\text{P}$  NMR (162 MHz,  $\text{CDCl}_3$ )  $\delta$  -12.6; IR (neat): 2934 (bs), 1433, 1357, 1163, 741, 698, 670; HRESIMS Calcd for  $[\text{C}_{37}\text{H}_{34}\text{N}_2\text{NaO}_2\text{PS}]^+$  ( $\text{M} + \text{Na}^+$ ) 610.1940, found 610.1945.

**di-*tert*-butyl (*R,E*)-2-(1,3-diphenylallyl)malonate (**8**)**

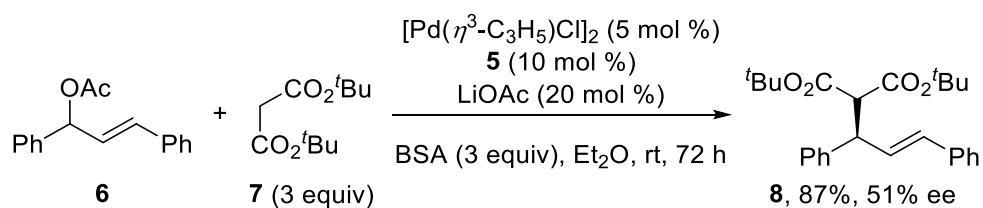

Compound **8** was prepared in 87% yield (35.6 mg) according to the known procedure (0.10 mmol scale)<sup>6</sup> by replacing ligand with compound **5**. This compound is known and the spectroscopic data match those reported. 51% ee. (determined by HPLC: Chiralpak ADH Column, 10/90 *i*-PrOH/hexane, 1.0 mL/min, 254 nm; TR = 5.95 min (major), 7.92 min (minor)). <sup>1</sup>H NMR (400 MHz, CDCl<sub>3</sub>) δ 7.34 – 7.28 (m, 7H), 7.24 – 7.14 (m, 3H), 6.44 (d, *J* = 15.6 Hz, 1H), 6.36 – 6.30 (m, 1H), 4.15 (dd, *J* = 10.8, 8.4 Hz, 1H), 3.73 (d, *J* = 10.8 Hz, 1H), 1.42 (s, 9H), 1.22 (s, 9H); <sup>13</sup>C NMR (100 MHz, CDCl<sub>3</sub>) δ 167.3, 166.8, 140.8, 137.0, 131.2, 130.1, 128.5, 128.4, 128.2, 127.3, 126.8, 126.3, 81.8, 81.6, 59.3, 49.0, 27.9, 27.6.

## 7. Crystal data of compound 2o. CCDC Number = 2234664.

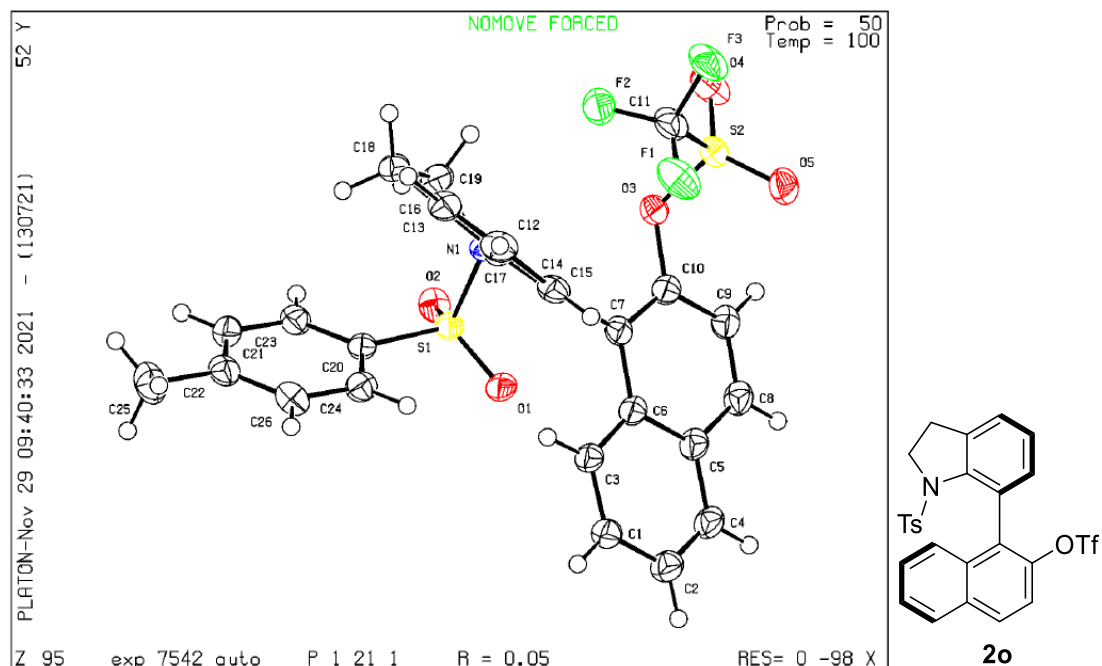

Bond precision: C-C = 0.0062 Å

Wavelength=1.54184

Cell: a=6.9978 (1) b=14.4109 (3) c=12.2598 (2)  
 alpha=90 beta=91.455 (2) gamma=90  
 Temperature: 100 K

|                        | Calculated                                                                     | Reported                                                                       |
|------------------------|--------------------------------------------------------------------------------|--------------------------------------------------------------------------------|
| Volume                 | 1235.94 (4)                                                                    | 1235.94 (4)                                                                    |
| Space group            | P 21                                                                           | P 1 21 1                                                                       |
| Hall group             | P 2yb                                                                          | P 2yb                                                                          |
| Moiety formula         | C <sub>26</sub> H <sub>20</sub> F <sub>3</sub> N O <sub>5</sub> S <sub>2</sub> | C <sub>26</sub> H <sub>20</sub> F <sub>3</sub> N O <sub>5</sub> S <sub>2</sub> |
| Sum formula            | C <sub>26</sub> H <sub>20</sub> F <sub>3</sub> N O <sub>5</sub> S <sub>2</sub> | C <sub>26</sub> H <sub>20</sub> F <sub>3</sub> N O <sub>5</sub> S <sub>2</sub> |
| Mr                     | 547.55                                                                         | 547.55                                                                         |
| Dx, g cm <sup>-3</sup> | 1.471                                                                          | 1.471                                                                          |
| Z                      | 2                                                                              | 2                                                                              |
| Mu (mm <sup>-1</sup> ) | 2.505                                                                          | 2.505                                                                          |
| F000                   | 564.0                                                                          | 564.0                                                                          |
| F000'                  | 567.21                                                                         |                                                                                |
| h, k, lmax             | 8, 18, 15                                                                      | 8, 18, 15                                                                      |
| Nref                   | 5091 [ 2650]                                                                   | 4648                                                                           |
| Tmin, Tmax             | 0.942, 0.951                                                                   | 0.181, 1.000                                                                   |
| Tmin'                  | 0.882                                                                          |                                                                                |

Correction method= # Reported T Limits: Tmin=0.181 Tmax=1.000  
 AbsCorr = MULTI-SCAN

Data completeness= 1.75/0.91 Theta(max)= 75.214

R(reflections)= 0.0478 ( 4522)

wR2(reflections)=  
0.1351 ( 4648)

S = 1.097

Npar= 335

## 8. Computational Studies

All calculations were performed using Gaussian 16 package.<sup>7</sup> Geometry optimizations and vibration frequencies were calculated by using B3LYP-D3(BJ) level of density function theory<sup>8-10</sup> with the 6-31G(d,p) basis set<sup>11,12</sup> for all the atoms in the system. All local minimums were confirmed with no imaginary frequency and all transition states had only one imaginary frequency. And every transition state was checked by intrinsic reaction coordinate (IRC). The SMD solvation model<sup>13</sup> with DCB was used for all calculations. The ball stick models of molecules were drawn by CYLview 2.0.<sup>14</sup>

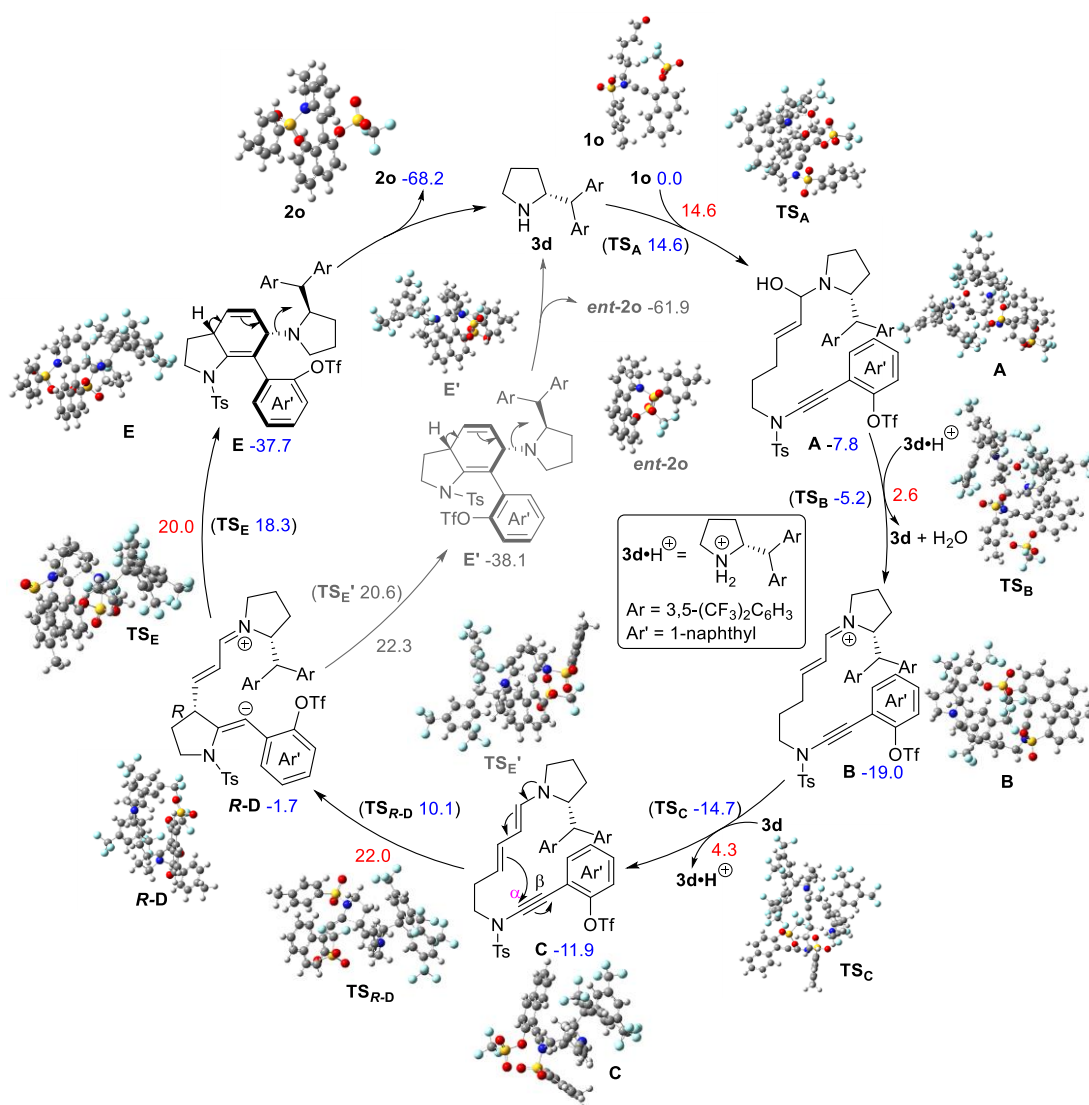

**Figure S1.** Plausible reaction mechanism (through the pathway of **R-D**). Relative free energies ( $\Delta G$ , in kcal/mol) of all the transition states and intermediates were computed at the SMD(DCB)-B3LYP-D3BJ/6-31G(d,p) level of theory.

Our DFT calculations gave a clear explanation for the mechanism of (4 + 2) annulation for the synthesis of axially chiral 7-aryl indoline **2o** (Figure S1). The substrate **1o** and chiral secondary amine catalyst **3d** undergo condensation and isomerization to form dienamine intermediate **C** ( $\Delta G = -11.9$  kcal/mol). Subsequently, an intramolecular nucleophilic addition takes place to deliver the major vinyl anion intermediate **R-D** through transition state **TS<sub>R-D</sub>** with a free energy barrier of 22.0 kcal/mol, which is kinetically and thermodynamically more favorable than the minor vinyl anion intermediate **S-D** (with a free energy barrier of 24.6 kcal/mol through **TS<sub>S-D</sub>**, Figure S2). This first cyclization step is considered as the rate-determining step.

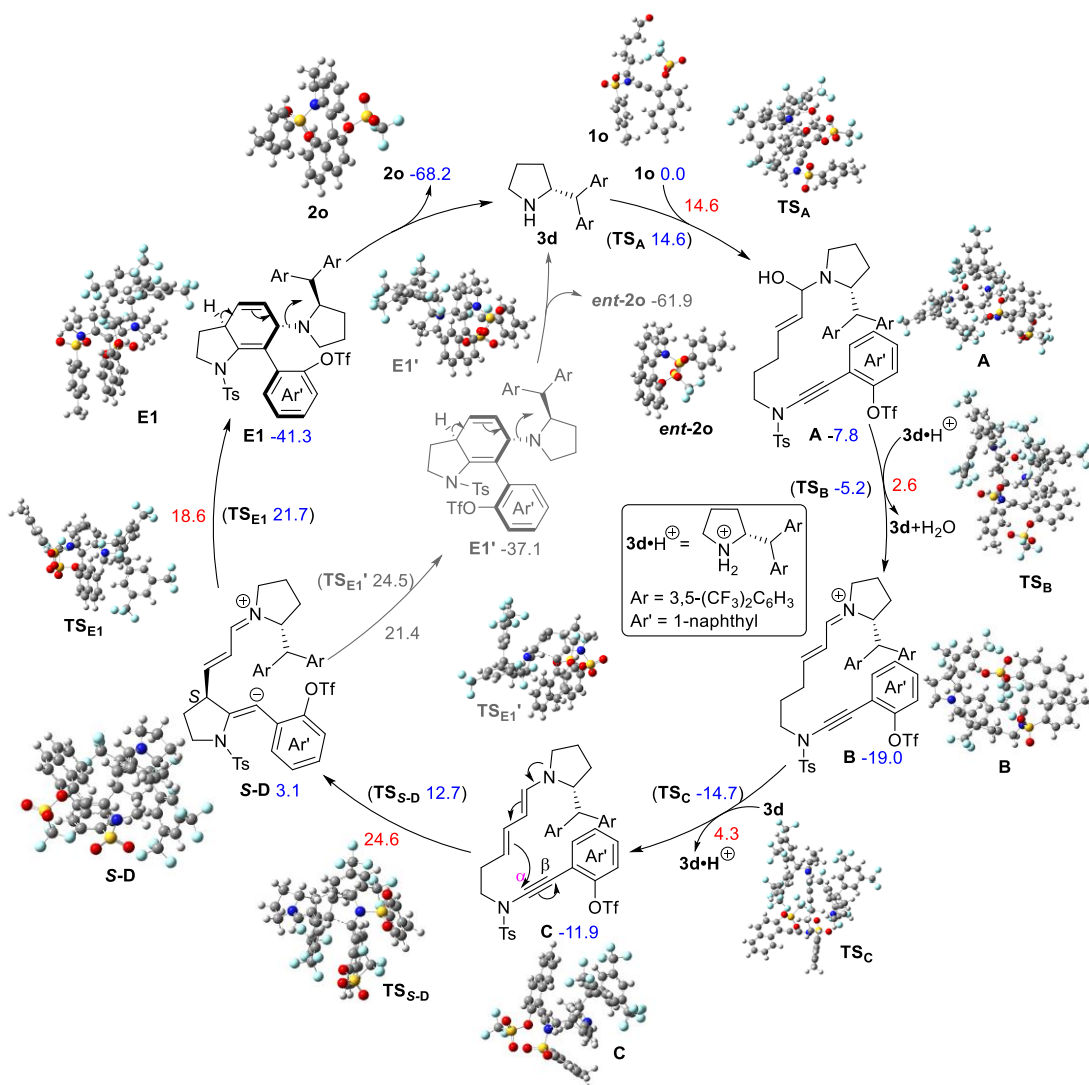

**Figure S2.** Plausible reaction mechanism (through the pathway of **S-D**). Relative free energies ( $\Delta G$ , in kcal/mol) of all the transition states and intermediates were computed at the SMD(DCB)-B3LYP-D3BJ/6-31G(d,p) level of theory.

Further cyclization of intermediate **R-D** forms the axially chiral intermediate **E** through **TS<sub>E</sub>** with a free energy barrier of 20.0 kcal/mol. Finally, aromatization of **E** furnishes axially chiral 7-aryl indoline **2o** and regenerates catalyst **3d**. The calculated free energy of the reaction is -68.2 kcal/mol.

To find out the enantio-determining step, we performed more theoretical calculations for the first cyclization step (from intermediate **C** to intermediate **D**), which produced a new chiral center. The optimized structures and relative free energies of the enantiomeric transition states **TS<sub>R-D</sub>** and **TS<sub>S-D</sub>** are shown in Figure S3. The free energy of transition state **TS<sub>R-D</sub>** is 2.6 kcal/mol lower than **TS<sub>S-D</sub>**, indicating that the intermediate **R-D** is the major intermediate. Thus, the enantioselectivity of this cyclization could be well controlled and the theoretically predicted ratio of **TS<sub>R-D</sub>** and **TS<sub>S-D</sub>** is 98.3:1.7 (e.r.). It should be noted that, both **TS<sub>R-D</sub>** and **TS<sub>S-D</sub>** could lead to the enantioselective generation **2o** and *ent-2o*. Therefore, the first cyclization step is not the enantio-determining step.

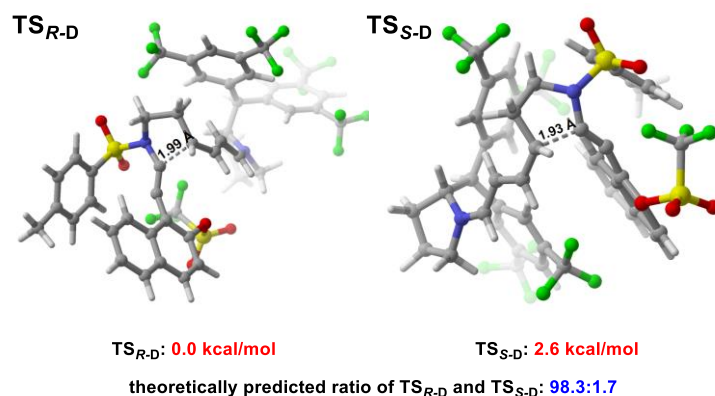

**Figure S3.** Optimized structures and relative free energies of the enantiomeric transition states **TS<sub>R-D</sub>** and **TS<sub>S-D</sub>**.

Further theoretical calculations have been conducted to explain the origin of enantioselectivity in the enantio-determining cyclization step (from intermediate **D** to intermediate **E**). The optimized structures and relative free energies of the enantiomeric transition states are shown in Figure S4. Starting from intermediate **R-D**, the free energy of transition state **TS<sub>E</sub>** (leading to the major enantiomer) is 2.3 kcal/mol lower than **TS<sub>E'</sub>** (leading to the minor enantiomer) and the theoretically predicted enantioselectivity matches well with the experimental ee value (94.6% versus 96%).

Inspection of the structures of transition states shows that  $\text{TS}_{\text{E}'}$  has a shorter  $\text{C}\cdots\text{C}$  distance than  $\text{TS}_{\text{E}}$  (2.14 Å *versus* 2.30 Å), suggesting that  $\text{TS}_{\text{E}'}$  has stronger steric repulsion and lower stability.  $\text{TS}_{\text{E}}$  also possesses a  $\pi$ - $\pi$  stacking between the naphthyl and Ts group, making  $\text{TS}_{\text{E}}$  more stable. Thus, the observed enantioselectivity originates from steric effects and  $\pi$ - $\pi$  stacking effect. On the other hand, the enantiomeric transition states starting from  $\text{S-D}$  were also calculated. The free energy of transition state  $\text{TS}_{\text{E1}}$  (leading to the major enantiomer) is 2.8 kcal/mol lower than  $\text{TS}_{\text{E1}'}$  (leading to the minor enantiomer) and the theoretically predicted enantioselectivity also matches well with the experimental ee value (97.4% *versus* 96%). In conclusion, the observed enantioselectivity is majorly controlled by the  $\text{R-D}$  pathway, and the  $\text{S-D}$  pathway has much smaller contribution due to the enantioinduction in the first cyclization step (Figure S3).

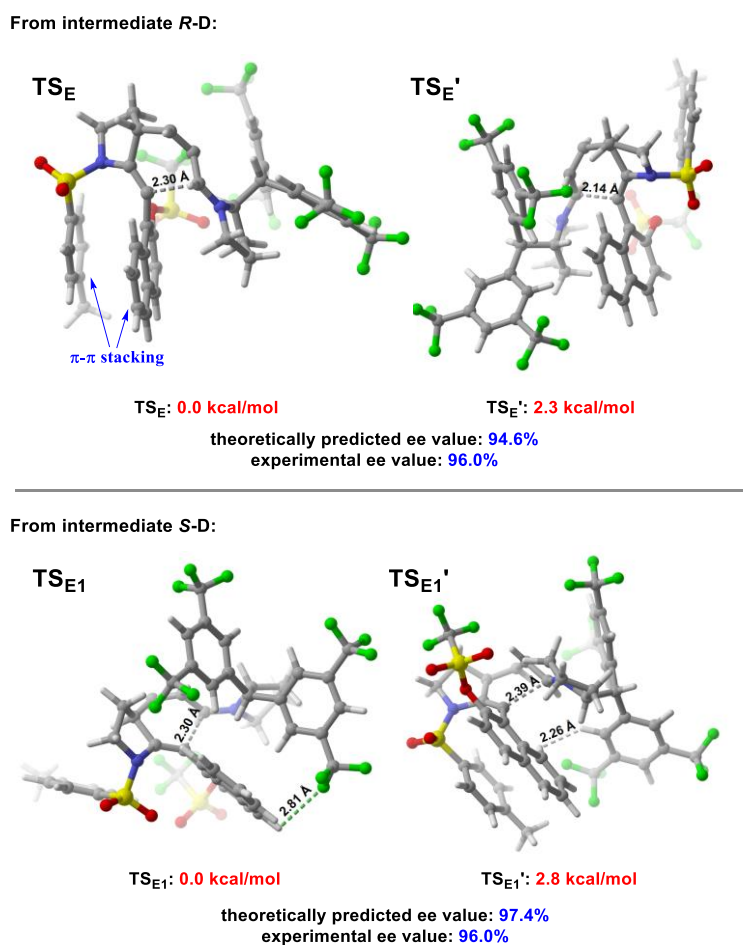

**Figure S4.** Optimized structures and relative free energies of the enantiomeric transition states.

## XYZ Coordinates

1o

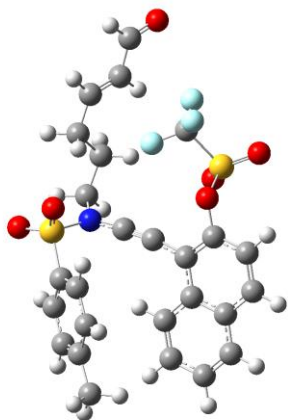

|   |             |             |             |
|---|-------------|-------------|-------------|
| N | 0.04350400  | -2.08297000 | -0.77566500 |
| S | 0.65198000  | -3.16665300 | 0.41288500  |
| O | 0.56295900  | -4.50214200 | -0.19452700 |
| O | -0.01498700 | -2.92381900 | 1.70154000  |
| C | 2.33725800  | -2.62688800 | 0.54095100  |
| C | 2.70593900  | -1.78913200 | 1.59551200  |
| C | 3.24214300  | -2.99462400 | -0.45512900 |
| C | 4.01146900  | -1.31583300 | 1.64481000  |
| H | 1.98155400  | -1.50888400 | 2.35017800  |
| C | 4.54571400  | -2.51112400 | -0.38279900 |
| H | 2.93611300  | -3.64257600 | -1.26869800 |
| C | 4.94753300  | -1.66460200 | 0.65982500  |
| H | 4.30775700  | -0.65520500 | 2.45354900  |
| H | 5.26051200  | -2.79083700 | -1.14993100 |
| C | 6.34730600  | -1.11869700 | 0.72237500  |
| H | 6.33186700  | -0.02416800 | 0.74573000  |
| H | 6.85660000  | -1.45545400 | 1.63191500  |
| H | 6.93978900  | -1.43606600 | -0.13866500 |
| C | 0.28605700  | -0.78504200 | -0.54997300 |
| C | 0.59120600  | 0.36234400  | -0.29218000 |
| C | 1.14021900  | 1.65722600  | -0.10794700 |
| C | 2.50413700  | 1.93303400  | -0.47816300 |
| C | 0.39586600  | 2.69500700  | 0.43029400  |
| C | 3.34722600  | 0.93166100  | -1.01928100 |
| C | 3.02576800  | 3.25272700  | -0.28688900 |
| C | 0.88846500  | 3.99754700  | 0.60559700  |
| C | 4.65135800  | 1.22187100  | -1.35297200 |
| H | 2.95251000  | -0.06676100 | -1.16261200 |
| C | 4.37524200  | 3.51708500  | -0.64086300 |



|   |             |             |             |
|---|-------------|-------------|-------------|
| C | 2.18982600  | 4.26713200  | 0.24957800  |
| H | 0.24153800  | 4.75620100  | 1.03000400  |
| C | 5.17254100  | 2.52331200  | -1.16111800 |
| H | 5.28590100  | 0.44371300  | -1.76398200 |
| H | 4.76358200  | 4.51990700  | -0.49167700 |
| H | 2.59450800  | 5.26511700  | 0.38284600  |
| H | 6.20282400  | 2.73475700  | -1.42834500 |
| S | -2.16709900 | 2.59702200  | -0.12197200 |
| O | -1.85366100 | 2.04920100  | -1.43583100 |
| O | -2.74000400 | 3.93122100  | 0.00997600  |
| C | -0.92034100 | -2.52422200 | -1.81479800 |
| H | -0.57311000 | -2.09720600 | -2.75871400 |
| H | -0.83020400 | -3.60910500 | -1.88269600 |
| C | -2.35325000 | -2.09596100 | -1.52484800 |
| H | -2.95890600 | -2.37860300 | -2.39325700 |
| H | -2.39189100 | -1.00382400 | -1.45358900 |
| C | -2.92180600 | -2.73126500 | -0.25848500 |
| H | -2.86107400 | -3.82735100 | -0.32382500 |
| H | -2.30078100 | -2.47058800 | 0.60977600  |
| C | -4.32670400 | -2.35811600 | 0.07702700  |
| H | -4.73020400 | -2.81643600 | 0.98045100  |
| C | -5.11508000 | -1.50546300 | -0.60093100 |
| H | -4.79065900 | -0.99718400 | -1.50372400 |
| C | -6.44337000 | -1.18692300 | -0.09963800 |
| H | -6.74172900 | -1.72787800 | 0.82174400  |
| O | -7.20787800 | -0.37815100 | -0.62159200 |
| O | -0.90648600 | 2.41892400  | 0.90592200  |
| C | -3.27271800 | 1.39702100  | 0.79221400  |
| F | -3.48135800 | 1.84186200  | 2.02445600  |
| F | -4.42187800 | 1.33619800  | 0.12631700  |
| F | -2.69350700 | 0.20338300  | 0.82829900  |

# TS<sub>A</sub>

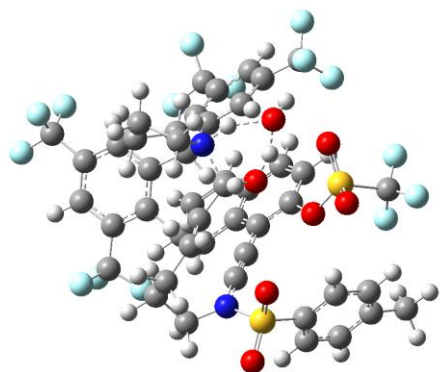

|   |             |             |             |
|---|-------------|-------------|-------------|
| N | 2.09795100  | -3.57559000 | -0.29183600 |
| S | 3.69106700  | -3.66121600 | 0.36925600  |
| O | 4.13503500  | -5.03762800 | 0.09025700  |
| O | 3.72081400  | -3.20083700 | 1.76295800  |
| C | 4.54413300  | -2.48259300 | -0.64264500 |
| C | 5.17508500  | -1.40724700 | -0.02568100 |
| C | 4.56309900  | -2.65066900 | -2.03125600 |
| C | 5.83382900  | -0.47332800 | -0.82250200 |
| H | 5.12772800  | -1.28623000 | 1.04808500  |
| C | 5.21489900  | -1.70152800 | -2.80561500 |
| H | 4.06449300  | -3.49408500 | -2.49568200 |
| C | 5.85256800  | -0.59626200 | -2.21541700 |
| H | 6.32299400  | 0.37277100  | -0.35210600 |
| H | 5.22596900  | -1.81096900 | -3.88563400 |
| C | 6.51324000  | 0.44579900  | -3.07572700 |
| H | 7.18312900  | -0.01507300 | -3.80837800 |
| H | 5.76147600  | 1.01212900  | -3.63691800 |
| H | 7.08876300  | 1.15354400  | -2.47528100 |
| C | 1.65349700  | -2.37968200 | -0.68969200 |
| C | 1.33324300  | -1.27935600 | -1.09510200 |
| C | 0.94164500  | 0.00615900  | -1.54506900 |
| C | -0.15144500 | 0.16973400  | -2.46522800 |
| C | 1.60431300  | 1.14682600  | -1.11262100 |
| C | -0.84152400 | -0.94304600 | -3.00254000 |
| C | -0.56040600 | 1.48496400  | -2.84411400 |
| C | 1.22129200  | 2.44486300  | -1.49673800 |
| C | -1.92542200 | -0.76820600 | -3.83339600 |
| H | -0.50566100 | -1.93756500 | -2.74433800 |
| C | -1.66998600 | 1.63316900  | -3.71703100 |
| C | 0.14153800  | 2.60560100  | -2.33335700 |
| H | 1.74247800  | 3.31441500  | -1.12194500 |
| C | -2.35001600 | 0.53332700  | -4.18812300 |

|   |             |             |             |
|---|-------------|-------------|-------------|
| H | -2.45813600 | -1.63571000 | -4.20895400 |
| H | -1.98227600 | 2.63426200  | -3.99052400 |
| H | -0.18476800 | 3.60227100  | -2.60848200 |
| H | -3.20768900 | 0.66235800  | -4.84034200 |
| S | 3.35134600  | 1.88987800  | 0.77986400  |
| O | 4.21708600  | 1.08885400  | 1.62523700  |
| O | 2.33891500  | 2.78573000  | 1.31253400  |
| C | 1.23616200  | -4.78324700 | -0.30883900 |
| H | 0.79738000  | -4.83963000 | -1.30682600 |
| H | 1.90815700  | -5.63457800 | -0.19536100 |
| C | 0.14347600  | -4.82393600 | 0.75908200  |
| H | -0.37598300 | -5.77684200 | 0.60878700  |
| H | -0.60186600 | -4.04901200 | 0.57004000  |
| C | 0.65122700  | -4.74509600 | 2.20463500  |
| H | -0.05235900 | -5.27578300 | 2.86110400  |
| H | 1.59273500  | -5.30167200 | 2.29750900  |
| C | 0.85321500  | -3.36978600 | 2.78229700  |
| H | 1.43494800  | -3.34253700 | 3.70281200  |
| C | 0.39352800  | -2.21507400 | 2.29479900  |
| H | -0.16013400 | -2.19160800 | 1.36865500  |
| C | 0.68997300  | -0.90433600 | 2.94751100  |
| H | 1.31241200  | -1.08071500 | 3.83737400  |
| O | 1.23424000  | 0.04226000  | 2.11719700  |
| O | 2.75681200  | 0.88372500  | -0.34188500 |
| C | 4.49377400  | 2.94452500  | -0.30782400 |
| F | 5.68762500  | 2.99959700  | 0.27266200  |
| F | 4.60592700  | 2.41339500  | -1.52209800 |
| F | 3.98063500  | 4.16903000  | -0.40366800 |
| C | -1.86662000 | -0.01704900 | 2.82214100  |
| C | -0.95060700 | -0.98277600 | 4.87925500  |
| C | -2.47169400 | -1.09278100 | 4.86521800  |
| C | -2.79700100 | -1.10434500 | 3.37289500  |
| H | -2.22766400 | 0.94376400  | 3.19861100  |
| H | -0.49317600 | -1.97246700 | 4.83569100  |
| H | -0.54057100 | -0.44068000 | 5.73200900  |
| H | -2.81487400 | -1.98820800 | 5.38723600  |
| H | -2.92968700 | -0.22101800 | 5.34289200  |
| H | -2.55273100 | -2.07373000 | 2.92650200  |
| H | -3.84612700 | -0.89060400 | 3.17141100  |
| C | -1.72460100 | 0.11094000  | 1.25869800  |
| H | -0.71473700 | -0.19539500 | 0.98709800  |
| C | -1.82862000 | 1.56879700  | 0.79327000  |
| C | -2.67204000 | 1.96887500  | -0.24748900 |
| C | -1.00811300 | 2.53642700  | 1.38866100  |

|   |             |             |             |
|---|-------------|-------------|-------------|
| C | -2.72942700 | 3.30497700  | -0.64349700 |
| H | -3.28752200 | 1.24990700  | -0.76826600 |
| C | -1.05956700 | 3.86577200  | 0.97329200  |
| H | -0.32131000 | 2.25078700  | 2.17290000  |
| C | -1.92803800 | 4.26651600  | -0.03927700 |
| H | -1.97189700 | 5.30280500  | -0.35369200 |
| C | -2.70323500 | -0.80026000 | 0.53759700  |
| C | -2.24279500 | -1.85431900 | -0.25488300 |
| C | -4.08318600 | -0.61049000 | 0.65063400  |
| C | -3.14056000 | -2.71646300 | -0.88474300 |
| H | -1.17923100 | -1.99390300 | -0.38899600 |
| C | -4.97715000 | -1.46936800 | 0.01230900  |
| H | -4.46833800 | 0.21741600  | 1.23599600  |
| C | -4.51675000 | -2.53434400 | -0.75536400 |
| H | -5.21362600 | -3.20197300 | -1.24690900 |
| C | -3.66100300 | 3.74349700  | -1.73435800 |
| C | -0.13433400 | 4.89835900  | 1.54830100  |
| C | -6.44630000 | -1.21827300 | 0.18607100  |
| C | -2.66097600 | -3.88069800 | -1.70212700 |
| F | -3.00293400 | 4.43716900  | -2.70182800 |
| F | -4.28569600 | 2.71278700  | -2.33951900 |
| F | -4.62432700 | 4.57430100  | -1.26862700 |
| F | -0.77314300 | 6.07188100  | 1.77038800  |
| F | 0.88878600  | 5.17901300  | 0.70363900  |
| F | 0.41468200  | 4.52259200  | 2.72536900  |
| F | -6.81090400 | -1.29974100 | 1.48945300  |
| F | -7.20843100 | -2.09575700 | -0.49748400 |
| F | -6.79066300 | 0.02384400  | -0.22899700 |
| F | -1.32231700 | -3.86733000 | -1.90937800 |
| F | -2.94566100 | -5.06199900 | -1.10453200 |
| F | -3.24643900 | -3.91253100 | -2.92261700 |
| N | -0.57580500 | -0.24948100 | 3.61649600  |
| H | -0.12190600 | 0.70148900  | 3.86828500  |
| O | 1.11648800  | 1.66625600  | 3.91699900  |
| H | 1.01056900  | 2.57674700  | 3.61835900  |
| H | 1.33210500  | 0.90169900  | 2.82900600  |

A

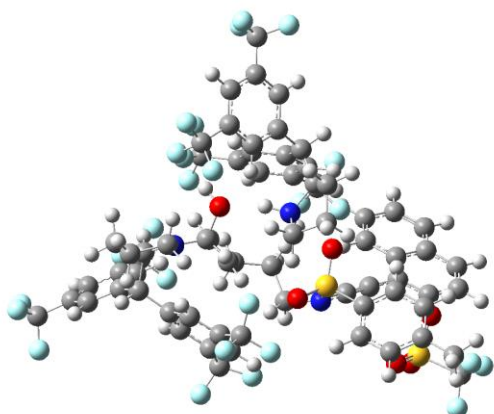

|   |             |             |             |
|---|-------------|-------------|-------------|
| N | -2.88101300 | -1.05047400 | -0.17087800 |
| S | -2.41858400 | 0.13619800  | -1.34476600 |
| O | -1.34791600 | -0.48738500 | -2.13591000 |
| O | -2.10893900 | 1.42025300  | -0.66900900 |
| C | -3.86306000 | 0.35154000  | -2.33229000 |
| C | -4.83715300 | 1.27015700  | -1.94039200 |
| C | -3.98291800 | -0.40775800 | -3.50025600 |
| C | -5.96537100 | 1.41832400  | -2.74156800 |
| H | -4.71936900 | 1.85002900  | -1.03348300 |
| C | -5.11395900 | -0.23285400 | -4.28571700 |
| H | -3.19942900 | -1.09781900 | -3.79116100 |
| C | -6.12156800 | 0.67358300  | -3.91761900 |
| H | -6.73879300 | 2.11904500  | -2.44563200 |
| H | -5.22067900 | -0.80760900 | -5.20027900 |
| C | -7.34967200 | 0.82229900  | -4.77221300 |
| H | -7.07889400 | 1.02499300  | -5.81329700 |
| H | -7.93512100 | -0.10293700 | -4.76485200 |
| H | -7.98949600 | 1.63255500  | -4.41631300 |
| C | -3.90144400 | -0.68089200 | 0.62440200  |
| C | -4.85012900 | -0.34611900 | 1.30253700  |
| C | -5.98852900 | 0.07160300  | 2.03621800  |
| C | -5.93017400 | 0.35427900  | 3.44191900  |
| C | -7.20358700 | 0.23843000  | 1.38899200  |
| C | -4.72987200 | 0.21019900  | 4.17770900  |
| C | -7.11239300 | 0.80562300  | 4.11070600  |
| C | -8.37162900 | 0.67128700  | 2.03284100  |
| C | -4.68899500 | 0.52443200  | 5.51712700  |
| H | -3.84376500 | -0.14168400 | 3.66701900  |
| C | -7.03946200 | 1.10471300  | 5.49705800  |

|   |             |             |             |
|---|-------------|-------------|-------------|
| C | -8.32084300 | 0.95270200  | 3.37927400  |
| H | -9.28441100 | 0.77456200  | 1.45849900  |
| C | -5.85399500 | 0.97294500  | 6.18412800  |
| H | -3.75570700 | 0.42859600  | 6.06226300  |
| H | -7.93864600 | 1.44358200  | 6.00246500  |
| H | -9.21090300 | 1.29290200  | 3.89842700  |
| H | -5.80923400 | 1.21136100  | 7.24184000  |
| S | -7.41564300 | -1.50206900 | -0.56537000 |
| O | -7.63008400 | -2.42648500 | 0.53935100  |
| O | -6.41592600 | -1.74399000 | -1.59249300 |
| C | -1.76683800 | -1.85477100 | 0.40785600  |
| H | -2.23815700 | -2.74181600 | 0.83199500  |
| H | -1.17743600 | -2.18018900 | -0.44444700 |
| C | -0.91343700 | -1.10560100 | 1.44388600  |
| H | -1.31844700 | -1.26536500 | 2.44573100  |
| H | -0.96814100 | -0.03157400 | 1.25015300  |
| C | 0.56317000  | -1.54171000 | 1.38254400  |
| H | 1.11018800  | -1.16060500 | 2.24974500  |
| H | 0.61473900  | -2.63636000 | 1.43440600  |
| C | 1.19777100  | -1.05562900 | 0.11443200  |
| H | 0.63742800  | -1.21677300 | -0.80155500 |
| C | 2.37079100  | -0.43436500 | 0.00885800  |
| H | 2.99281400  | -0.25127400 | 0.87905300  |
| C | 2.87438900  | 0.09559200  | -1.29857400 |
| H | 2.09688200  | 0.01013000  | -2.06732600 |
| O | 3.00635700  | 1.55095700  | -1.18509100 |
| O | -7.25158300 | 0.03430700  | -0.00701200 |
| C | -9.04724900 | -1.23539600 | -1.43581900 |
| F | -9.97623400 | -0.92985500 | -0.53398500 |
| F | -8.92071300 | -0.24197800 | -2.31064900 |
| F | -9.37468700 | -2.35849100 | -2.06511400 |
| C | 4.82847200  | -1.53188300 | -1.04815700 |
| C | 4.73703400  | -0.03010400 | -2.96072300 |
| C | 5.96520200  | -0.94361700 | -3.07829000 |
| C | 6.24252100  | -1.34704000 | -1.62065900 |
| H | 4.81303600  | -1.35581500 | 0.02880900  |
| H | 4.06153100  | -0.11432200 | -3.82541700 |
| H | 5.02540500  | 1.02430600  | -2.88045800 |
| H | 5.72028600  | -1.83134400 | -3.67160100 |
| H | 6.81224600  | -0.44572200 | -3.55485500 |
| H | 6.85686600  | -2.24571100 | -1.52448700 |
| H | 6.74322200  | -0.52979100 | -1.09164200 |
| C | 4.35283400  | -3.04654500 | -1.27526400 |
| H | 4.98165900  | -3.45024100 | -2.07590000 |

|   |             |             |             |
|---|-------------|-------------|-------------|
| C | 2.91459100  | -3.22439500 | -1.74580100 |
| C | 2.49157700  | -2.58443600 | -2.91713500 |
| C | 1.98486800  | -4.02325700 | -1.07210100 |
| C | 1.16040100  | -2.65321800 | -3.33045700 |
| H | 3.19479400  | -2.01006900 | -3.50454500 |
| C | 0.66647200  | -4.12466600 | -1.51659500 |
| H | 2.27031600  | -4.56499800 | -0.18048000 |
| C | 0.23010200  | -3.42274100 | -2.63660100 |
| H | -0.80183900 | -3.47008000 | -2.95638000 |
| C | 4.64976900  | -3.81618400 | -0.00958900 |
| C | 5.56377700  | -4.86819500 | 0.02845600  |
| C | 3.98681000  | -3.46644000 | 1.17260900  |
| C | 5.79376300  | -5.56198400 | 1.22087900  |
| H | 6.09706000  | -5.15119200 | -0.87288600 |
| C | 4.19789300  | -4.17779700 | 2.34903100  |
| H | 3.27805400  | -2.64716400 | 1.16285500  |
| C | 5.10668700  | -5.23393500 | 2.38822100  |
| H | 5.27727700  | -5.78456900 | 3.30408200  |
| C | 0.74530100  | -1.84602100 | -4.52457400 |
| C | -0.27845500 | -5.01359300 | -0.76252700 |
| C | 3.36810000  | -3.80732500 | 3.54296800  |
| C | 6.74861400  | -6.72070400 | 1.21224900  |
| F | 1.40356300  | -2.22149600 | -5.64575400 |
| F | -0.57524100 | -1.93496000 | -4.78549800 |
| F | 1.02677800  | -0.52260100 | -4.35411900 |
| F | -0.15101600 | -4.85975600 | 0.58140900  |
| F | -0.05487700 | -6.32444600 | -1.01575600 |
| F | -1.57189600 | -4.76721400 | -1.06687600 |
| F | 2.05899100  | -4.11126900 | 3.34247300  |
| F | 3.41017200  | -2.47563300 | 3.79079800  |
| F | 3.75583800  | -4.44033000 | 4.66760100  |
| F | 7.84277000  | -6.46486700 | 0.45835600  |
| F | 7.17964100  | -7.04155200 | 2.45105800  |
| F | 6.17768400  | -7.83573600 | 0.69392700  |
| N | 4.09401200  | -0.48920600 | -1.73035000 |
| H | 3.65853700  | 1.75115000  | -0.49515700 |
| C | -0.02045700 | 3.98019500  | -1.15997600 |
| C | 0.35619700  | 2.38388800  | -2.99824000 |
| C | -0.47186800 | 3.57237700  | -3.47750300 |
| C | -0.05894100 | 4.69051100  | -2.51326900 |
| H | -1.04542200 | 3.86765500  | -0.80430300 |
| H | 1.38673000  | 2.44018500  | -3.35232400 |
| H | -0.05553500 | 1.40621500  | -3.23736700 |
| H | -0.26526200 | 3.80698900  | -4.52294900 |

|   |             |            |             |
|---|-------------|------------|-------------|
| H | -1.53949700 | 3.35298100 | -3.37529900 |
| H | 0.92488400  | 5.08420300 | -2.78139500 |
| H | -0.76444400 | 5.52289600 | -2.48639400 |
| C | 0.78001600  | 4.62466800 | -0.00942300 |
| H | 0.15674500  | 5.46858400 | 0.30451900  |
| C | 2.14734600  | 5.19214300 | -0.34439900 |
| C | 3.03623200  | 4.57322300 | -1.22509600 |
| C | 2.57972300  | 6.33150700 | 0.34140400  |
| C | 4.33421000  | 5.05785500 | -1.38655900 |
| H | 2.75293900  | 3.69257600 | -1.78181600 |
| C | 3.87112100  | 6.82497000 | 0.15891600  |
| H | 1.90530300  | 6.83199900 | 1.02806500  |
| C | 4.76697100  | 6.18684800 | -0.69806100 |
| H | 5.77344400  | 6.56444600 | -0.82612300 |
| C | 0.83692400  | 3.64529500 | 1.16641800  |
| C | -0.35500600 | 3.24606600 | 1.77849000  |
| C | 2.03475600  | 3.07412600 | 1.59833000  |
| C | -0.34737600 | 2.27926100 | 2.78371000  |
| H | -1.29752200 | 3.67829100 | 1.46079200  |
| C | 2.03124600  | 2.09618100 | 2.59356200  |
| H | 2.97328800  | 3.37112700 | 1.15189100  |
| C | 0.84405300  | 1.68686100 | 3.19631700  |
| H | 0.84543400  | 0.92205000 | 3.96242000  |
| C | 5.27972800  | 4.27432500 | -2.25106600 |
| C | 4.32069800  | 8.01762400 | 0.95453100  |
| C | 3.33326100  | 1.49032600 | 3.03221900  |
| C | -1.65209600 | 1.89242200 | 3.42169700  |
| F | 4.67396200  | 3.80432600 | -3.36605400 |
| F | 6.34724900  | 4.99716000 | -2.64182600 |
| F | 5.76029100  | 3.18551800 | -1.59089700 |
| F | 3.32002400  | 8.90811900 | 1.13542500  |
| F | 5.34163500  | 8.67038400 | 0.35942100  |
| F | 4.74961800  | 7.66016900 | 2.18928600  |
| F | 4.27366400  | 1.55605600 | 2.05464400  |
| F | 3.19703400  | 0.18399300 | 3.36041600  |
| F | 3.85342800  | 2.11220200 | 4.11258200  |
| F | -2.63207900 | 1.76398600 | 2.49718800  |
| F | -1.56519400 | 0.71615500 | 4.08738500  |
| F | -2.07793000 | 2.81619700 | 4.31281100  |
| N | 0.40237900  | 2.54482100 | -1.49296800 |
| H | -0.28094400 | 1.91762900 | -1.05043700 |
| H | 1.34696700  | 2.26869800 | -1.15976900 |



# TS<sub>B</sub>

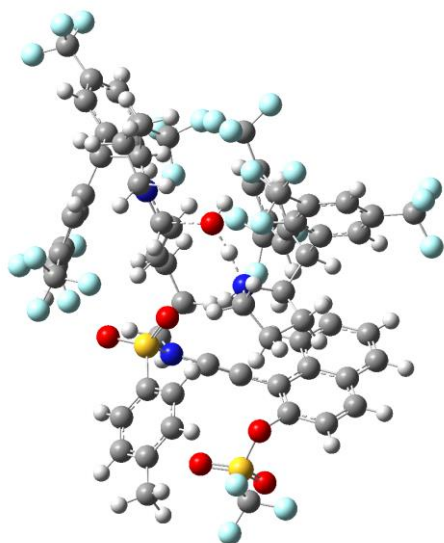

|   |             |             |             |
|---|-------------|-------------|-------------|
| N | -1.79190600 | -2.83268900 | 1.03529200  |
| S | -1.55536900 | -3.10064800 | -0.65314600 |
| O | -0.54439100 | -4.16181100 | -0.72154700 |
| O | -1.28847600 | -1.80745900 | -1.30959000 |
| C | -3.11323300 | -3.69380100 | -1.23644400 |
| C | -3.96674300 | -2.81646400 | -1.90553900 |
| C | -3.43015800 | -5.04342500 | -1.06246300 |
| C | -5.16601000 | -3.30976100 | -2.40786100 |
| H | -3.69497000 | -1.77823300 | -2.04224700 |
| C | -4.63489500 | -5.51102200 | -1.57061000 |
| H | -2.74536900 | -5.71093000 | -0.55215700 |
| C | -5.52256400 | -4.65399800 | -2.24015300 |
| H | -5.83650200 | -2.63816600 | -2.93269300 |
| H | -4.89572400 | -6.55684900 | -1.44356700 |
| C | -6.85191900 | -5.16441400 | -2.72130800 |
| H | -6.76412300 | -6.17272200 | -3.13528600 |
| H | -7.55852700 | -5.21556500 | -1.88494300 |
| H | -7.28225400 | -4.50781300 | -3.48084500 |
| C | -2.72951500 | -1.93428200 | 1.36446100  |
| C | -3.58035600 | -1.13834900 | 1.71010300  |
| C | -4.56992000 | -0.18774700 | 2.06424600  |
| C | -4.31027900 | 0.84888400  | 3.02428500  |
| C | -5.81661800 | -0.21225400 | 1.45916500  |
| C | -3.09103000 | 0.90990700  | 3.74237200  |
| C | -5.31460400 | 1.83949600  | 3.26660500  |
| C | -6.80827600 | 0.75320700  | 1.68574800  |
| C | -2.86798300 | 1.91546900  | 4.65852900  |
| H | -2.34109900 | 0.14547300  | 3.56977100  |

|   |             |             |             |
|---|-------------|-------------|-------------|
| C | -5.04594200 | 2.86903100  | 4.20657400  |
| C | -6.55140800 | 1.77514700  | 2.57022800  |
| H | -7.75483500 | 0.66807100  | 1.16514800  |
| C | -3.84998100 | 2.90777600  | 4.88674500  |
| H | -1.93015400 | 1.95112700  | 5.20203200  |
| H | -5.80858100 | 3.62154000  | 4.38194200  |
| H | -7.30122000 | 2.53617900  | 2.75840900  |
| H | -3.65800900 | 3.69673400  | 5.60635000  |
| S | -6.72915100 | -2.63183000 | 1.14348400  |
| O | -7.19248200 | -2.41293100 | 2.50714300  |
| O | -5.87266000 | -3.75437700 | 0.80043800  |
| C | -0.71653400 | -3.14689100 | 2.02722700  |
| H | -1.23532900 | -3.63627500 | 2.85342900  |
| H | -0.06287000 | -3.88671200 | 1.56550100  |
| C | 0.05403100  | -1.91837400 | 2.53904000  |
| H | 0.20996900  | -2.04811200 | 3.61320800  |
| H | -0.57462600 | -1.02874200 | 2.43079200  |
| C | 1.43313500  | -1.66324400 | 1.89710600  |
| H | 1.89503900  | -0.79828600 | 2.38167600  |
| H | 2.07556600  | -2.52565900 | 2.10781800  |
| C | 1.36653500  | -1.45820600 | 0.41991800  |
| H | 0.95961900  | -2.27692700 | -0.16191000 |
| C | 1.79015200  | -0.37571900 | -0.23737300 |
| H | 2.26546500  | 0.44695500  | 0.28743600  |
| C | 1.66771900  | -0.26584800 | -1.69856900 |
| H | 0.86783400  | -0.81964300 | -2.17848900 |
| O | 0.60886600  | 1.35734300  | -1.84046100 |
| O | -6.08467400 | -1.24301800 | 0.53044000  |
| C | -8.22773600 | -2.68192700 | 0.02272300  |
| F | -9.06790600 | -1.71918500 | 0.38799300  |
| F | -7.85678700 | -2.50334300 | -1.23985400 |
| F | -8.80458700 | -3.87185400 | 0.16380400  |
| C | 4.08987700  | 0.23622800  | -1.92705200 |
| C | 2.64475600  | 0.18771200  | -3.90109800 |
| C | 4.08956900  | 0.46804300  | -4.32036400 |
| C | 4.71111100  | 1.07371500  | -3.05097300 |
| H | 4.00917900  | 0.80086800  | -1.00170400 |
| H | 2.19246600  | -0.67841300 | -4.39366200 |
| H | 1.99749700  | 1.05555300  | -4.06312900 |
| H | 4.59727200  | -0.46525700 | -4.58442200 |
| H | 4.14242600  | 1.13646700  | -5.18117300 |
| H | 5.80223800  | 1.03415000  | -3.03657500 |
| H | 4.40273500  | 2.11632100  | -2.93529100 |
| C | 4.95663600  | -1.06964800 | -1.64833900 |

|   |             |             |             |
|---|-------------|-------------|-------------|
| H | 5.55260900  | -1.23282500 | -2.55146700 |
| C | 4.14592400  | -2.34601700 | -1.44838600 |
| C | 3.35385600  | -2.80002700 | -2.50836800 |
| C | 4.13203000  | -3.08243700 | -0.25971900 |
| C | 2.49457600  | -3.88592800 | -2.35072900 |
| H | 3.39141500  | -2.29572600 | -3.46523600 |
| C | 3.30427000  | -4.19693900 | -0.12458800 |
| H | 4.74676000  | -2.78558400 | 0.57872000  |
| C | 2.45886100  | -4.59809800 | -1.15716200 |
| H | 1.78176500  | -5.43171800 | -1.03000500 |
| C | 5.91163000  | -0.76389600 | -0.51461900 |
| C | 7.29269600  | -0.81653000 | -0.69565900 |
| C | 5.41472200  | -0.40172500 | 0.74355100  |
| C | 8.15703500  | -0.51531100 | 0.36173700  |
| H | 7.69802800  | -1.09044100 | -1.66376200 |
| C | 6.27851300  | -0.11271200 | 1.79437800  |
| H | 4.34516400  | -0.36136400 | 0.90508000  |
| C | 7.66101700  | -0.16365200 | 1.61378900  |
| H | 8.33360600  | 0.06565200  | 2.43069200  |
| C | 1.53441900  | -4.18760900 | -3.46229200 |
| C | 3.29622600  | -4.98610000 | 1.15143900  |
| C | 5.70967600  | 0.31310200  | 3.11665200  |
| C | 9.63904100  | -0.63169300 | 0.14635000  |
| F | 2.15265600  | -4.24432500 | -4.66552100 |
| F | 0.87545900  | -5.34788900 | -3.28929300 |
| F | 0.59510400  | -3.20623900 | -3.56862800 |
| F | 3.84991200  | -4.30698600 | 2.18235800  |
| F | 3.97328500  | -6.15139300 | 1.03870800  |
| F | 2.03287600  | -5.31292900 | 1.52779700  |
| F | 4.47386300  | -0.20091800 | 3.32360500  |
| F | 5.58189900  | 1.66413900  | 3.19935900  |
| F | 6.48425300  | -0.06489600 | 4.15333500  |
| F | 10.00638200 | -0.17473800 | -1.07269600 |
| F | 10.34691200 | 0.05854500  | 1.06516400  |
| F | 10.05259200 | -1.92018700 | 0.21600100  |
| N | 2.74642100  | -0.04322400 | -2.44634400 |
| H | 1.14575000  | 1.98770500  | -1.34062700 |
| C | -2.31261400 | 1.99743300  | 0.15145700  |
| C | -2.59515800 | 1.00187800  | -2.03710500 |
| C | -3.97977400 | 1.14190200  | -1.41250700 |
| C | -3.75062600 | 2.23760500  | -0.36317400 |
| H | -2.34630900 | 1.43302300  | 1.08285800  |
| H | -2.37838100 | 1.83130200  | -2.71534300 |
| H | -2.41605400 | 0.06549400  | -2.56421600 |

|   |             |            |             |
|---|-------------|------------|-------------|
| H | -4.74627700 | 1.40778800 | -2.14390600 |
| H | -4.27051500 | 0.20015300 | -0.93593600 |
| H | -3.82047400 | 3.22018400 | -0.83760700 |
| H | -4.47095800 | 2.21111000 | 0.45482800  |
| C | -1.54356500 | 3.31379000 | 0.46462900  |
| H | -2.14006400 | 3.75635600 | 1.27046900  |
| C | -1.54619700 | 4.32625200 | -0.66565400 |
| C | -0.99865200 | 4.05191800 | -1.92240700 |
| C | -2.14926800 | 5.57168600 | -0.47001300 |
| C | -1.06714600 | 4.98763100 | -2.95152300 |
| H | -0.50276100 | 3.11128100 | -2.12031200 |
| C | -2.20598000 | 6.50947300 | -1.50380000 |
| H | -2.58565600 | 5.81071600 | 0.49457700  |
| C | -1.67131000 | 6.22695100 | -2.75858300 |
| H | -1.72483600 | 6.95106400 | -3.56071100 |
| C | -0.17189000 | 3.03364800 | 1.07491500  |
| C | -0.12706800 | 2.35221300 | 2.29684300  |
| C | 1.03703300  | 3.41947000 | 0.49335400  |
| C | 1.08625100  | 2.05681600 | 2.91201200  |
| H | -1.05287200 | 2.06999200 | 2.78109500  |
| C | 2.25399600  | 3.07781100 | 1.09247100  |
| H | 1.04676900  | 3.98135800 | -0.43309900 |
| C | 2.29493500  | 2.40509900 | 2.30987600  |
| H | 3.23809600  | 2.15979800 | 2.77854400  |
| C | -0.51931500 | 4.58083400 | -4.28824400 |
| C | -2.84712200 | 7.83889800 | -1.22711600 |
| C | 3.53771100  | 3.43525900 | 0.39784200  |
| C | 1.08140900  | 1.40858900 | 4.26822300  |
| F | 0.72266600  | 4.04760500 | -4.17972900 |
| F | -1.29236300 | 3.62432000 | -4.86323600 |
| F | -0.44387300 | 5.60784500 | -5.15689700 |
| F | -4.08660300 | 7.69304400 | -0.70129100 |
| F | -2.96813200 | 8.59636300 | -2.33630500 |
| F | -2.13294700 | 8.55776700 | -0.32814100 |
| F | 3.40710200  | 3.34815100 | -0.95354100 |
| F | 4.54439800  | 2.60017000 | 0.74551400  |
| F | 3.94976300  | 4.69024400 | 0.66667100  |
| F | 0.08511400  | 0.49618000 | 4.39324500  |
| F | 2.23919000  | 0.77133900 | 4.53510200  |
| F | 0.88727400  | 2.31644500 | 5.25450000  |
| N | -1.66728400 | 1.08827000 | -0.86739600 |
| H | -1.63040900 | 0.14880300 | -0.46722600 |
| H | -0.47059900 | 1.27351100 | -1.28148900 |

## B

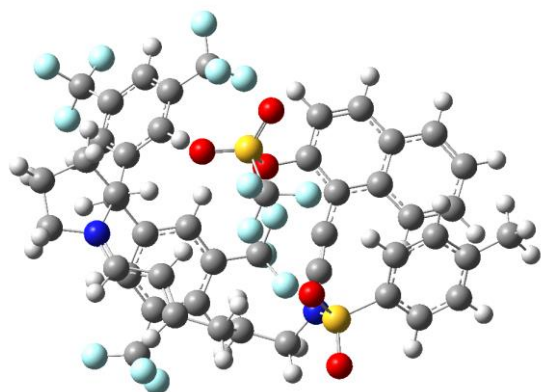

|   |            |             |             |
|---|------------|-------------|-------------|
| N | 3.46133700 | -2.08166200 | -0.39151000 |
| S | 4.68277000 | -2.35211600 | 0.79474800  |
| O | 5.27075900 | -3.65453900 | 0.44994800  |
| O | 4.13478200 | -2.15777200 | 2.14667100  |
| C | 5.79699300 | -1.01948600 | 0.43724100  |
| C | 5.81317100 | 0.10021900  | 1.27089400  |
| C | 6.59096300 | -1.09451800 | -0.70784400 |
| C | 6.64169100 | 1.16516100  | 0.93855500  |
| H | 5.18341000 | 0.13671800  | 2.15003700  |
| C | 7.41648900 | -0.01764800 | -1.01750000 |
| H | 6.56355000 | -1.97154500 | -1.34476200 |
| C | 7.45026600 | 1.12583700  | -0.20700500 |
| H | 6.65445000 | 2.04670500  | 1.57181000  |
| H | 8.03967800 | -0.06212600 | -1.90489500 |
| C | 8.32101500 | 2.30061500  | -0.55684700 |
| H | 8.84786200 | 2.14171500  | -1.50028400 |
| H | 7.71981600 | 3.21113100  | -0.64646600 |
| H | 9.06613200 | 2.47922200  | 0.22604800  |
| C | 2.97792000 | -0.83239500 | -0.44178000 |
| C | 2.64717700 | 0.33567100  | -0.41598900 |
| C | 2.42907100 | 1.73540400  | -0.47408300 |
| C | 3.36032900 | 2.58575600  | -1.16730600 |
| C | 1.34154100 | 2.33446700  | 0.14271800  |
| C | 4.50716100 | 2.06337300  | -1.81402900 |
| C | 3.13189500 | 3.99868100  | -1.18971800 |
| C | 1.09122800 | 3.71481800  | 0.10671300  |
| C | 5.39232000 | 2.90365100  | -2.45137300 |
| H | 4.68160400 | 0.99459900  | -1.79257300 |
| C | 4.06484800 | 4.83648000  | -1.85590400 |

|   |             |             |             |
|---|-------------|-------------|-------------|
| C | 1.98298200  | 4.53113800  | -0.55003500 |
| H | 0.21240400  | 4.11450700  | 0.59127100  |
| C | 5.17294500  | 4.30161800  | -2.47206400 |
| H | 6.26927200  | 2.49015500  | -2.93824500 |
| H | 3.88504300  | 5.90706800  | -1.86644200 |
| H | 1.81113900  | 5.60197600  | -0.58378400 |
| H | 5.88183800  | 4.94957100  | -2.97719000 |
| S | 0.31231000  | 1.48046400  | 2.41834000  |
| O | -0.96493700 | 0.85150900  | 2.72471300  |
| O | 0.70722700  | 2.76030300  | 2.98386400  |
| C | 2.75668300  | -3.21289000 | -1.04033500 |
| H | 2.71549400  | -2.98379900 | -2.10767200 |
| H | 3.38433300  | -4.09485500 | -0.90870900 |
| C | 1.35221700  | -3.42881600 | -0.49746300 |
| H | 0.85379900  | -4.16820800 | -1.13092900 |
| H | 0.78727100  | -2.49865500 | -0.59208300 |
| C | 1.32160200  | -3.90088100 | 0.96780000  |
| H | 1.87740800  | -4.83637000 | 1.06852900  |
| H | 1.82090800  | -3.15562400 | 1.59581100  |
| C | -0.08030400 | -4.08555000 | 1.44950500  |
| H | -0.39861800 | -5.09702800 | 1.69552400  |
| C | -0.99044600 | -3.08908700 | 1.56532100  |
| H | -0.74730400 | -2.06375300 | 1.31176100  |
| C | -2.29795900 | -3.41932100 | 2.02789900  |
| H | -2.48235100 | -4.45209800 | 2.31624800  |
| C | -4.60809900 | -3.07902800 | 2.75152200  |
| C | -3.36740400 | -1.16829800 | 1.86680400  |
| C | -5.39147700 | -1.78653400 | 3.02489900  |
| H | -4.38787300 | -3.64106800 | 3.66015400  |
| H | -5.09707800 | -3.74220100 | 2.03531400  |
| C | -4.33080300 | -0.67648500 | 2.95335000  |
| H | -2.37391200 | -0.73616100 | 1.95612100  |
| H | -6.15689900 | -1.63388700 | 2.26056500  |
| H | -5.88907900 | -1.82239200 | 3.99461900  |
| H | -4.75073400 | 0.30193200  | 2.72352600  |
| H | -3.78259400 | -0.59977700 | 3.89638800  |
| N | -3.30936300 | -2.61583300 | 2.17699900  |
| C | -3.92199200 | -0.96644900 | 0.41812600  |
| H | -4.84024500 | -1.55468900 | 0.34207600  |
| C | -2.96827700 | -1.51572100 | -0.63294900 |
| C | -1.97871500 | -0.73096700 | -1.23648500 |
| C | -3.06225900 | -2.86385800 | -0.98615600 |
| C | -1.12131200 | -1.28731700 | -2.18239600 |
| H | -1.87822400 | 0.31785800  | -0.99128500 |

|   |             |             |             |
|---|-------------|-------------|-------------|
| C | -2.17309700 | -3.42077800 | -1.90511600 |
| H | -3.82696700 | -3.48722300 | -0.53685400 |
| C | -1.20579000 | -2.63663200 | -2.52363800 |
| H | -0.52199200 | -3.06764700 | -3.24443800 |
| C | -4.29753700 | 0.48156300  | 0.17243900  |
| C | -3.44384900 | 1.53373300  | 0.51980300  |
| C | -5.51802100 | 0.77711800  | -0.43650100 |
| C | -3.80463300 | 2.85096800  | 0.24328300  |
| H | -2.50060800 | 1.33408900  | 1.01103400  |
| C | -5.87545000 | 2.10009700  | -0.70016000 |
| H | -6.19135900 | -0.02845300 | -0.70890900 |
| C | -5.02208100 | 3.14847800  | -0.36685400 |
| H | -5.29977300 | 4.17408500  | -0.57480400 |
| O | 0.39969400  | 1.48820900  | 0.78653600  |
| C | 1.63342400  | 0.23038900  | 2.87207200  |
| F | 1.55807200  | 0.02387700  | 4.18146600  |
| F | 1.39223600  | -0.90154400 | 2.21999600  |
| F | 2.82702000  | 0.71458100  | 2.55393900  |
| C | -0.09885000 | -0.43293400 | -2.87540800 |
| C | -2.17913700 | -4.90360100 | -2.12775600 |
| C | -2.83634100 | 3.95923200  | 0.53885600  |
| C | -7.22433400 | 2.39073000  | -1.29403700 |
| F | 1.09529300  | -1.06618400 | -2.97315500 |
| F | -0.47438400 | -0.12754300 | -4.13885900 |
| F | 0.11372500  | 0.73535200  | -2.23346800 |
| F | -1.71306200 | -5.24684600 | -3.34497300 |
| F | -3.41075200 | -5.43923300 | -1.99367000 |
| F | -1.38456300 | -5.52717700 | -1.21392500 |
| F | -2.03994000 | 3.67262000  | 1.59962500  |
| F | -3.45597800 | 5.12555500  | 0.80777500  |
| F | -2.00817100 | 4.18630300  | -0.51105800 |
| F | -7.25848900 | 3.58487100  | -1.92182000 |
| F | -7.59110900 | 1.44926800  | -2.19239600 |
| F | -8.19097400 | 2.41692600  | -0.34443100 |

# TSc

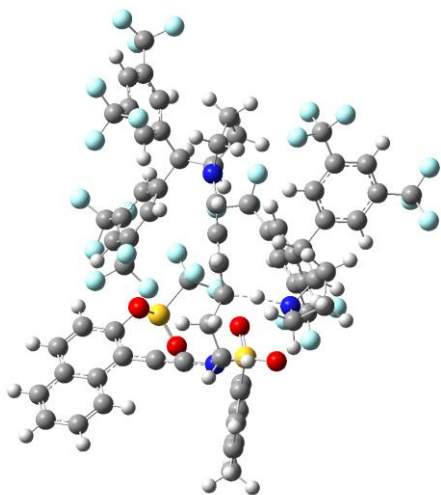

|   |             |             |             |
|---|-------------|-------------|-------------|
| N | 4.19892800  | 1.15366900  | 2.05607200  |
| S | 4.00684700  | 2.24513900  | 0.74149500  |
| O | 3.71182500  | 3.54459400  | 1.37998300  |
| O | 3.05525100  | 1.71027900  | -0.23976800 |
| C | 5.62174800  | 2.25240300  | 0.01765100  |
| C | 5.72155300  | 2.18456600  | -1.37064700 |
| C | 6.74809700  | 2.39512700  | 0.83306500  |
| C | 6.98660100  | 2.25223100  | -1.94884900 |
| H | 4.83711700  | 2.06499000  | -1.98066400 |
| C | 7.99852500  | 2.45514300  | 0.23314800  |
| H | 6.64957200  | 2.44249700  | 1.91137600  |
| C | 8.13744900  | 2.38610800  | -1.16345600 |
| H | 7.07957300  | 2.19163800  | -3.02831300 |
| H | 8.88354900  | 2.55278300  | 0.85419900  |
| C | 9.50153900  | 2.45921700  | -1.79250100 |
| H | 9.95175000  | 3.44461000  | -1.62731200 |
| H | 10.17652300 | 1.71950300  | -1.35003600 |
| H | 9.45428000  | 2.28339500  | -2.86935700 |
| C | 4.46355600  | -0.12018400 | 1.71796300  |
| C | 4.71151100  | -1.27475000 | 1.44183900  |
| C | 4.95344400  | -2.62847900 | 1.09790300  |
| C | 5.87144400  | -3.44159800 | 1.84706300  |
| C | 4.29870200  | -3.21536300 | 0.02545900  |
| C | 6.58252200  | -2.92905300 | 2.96002200  |
| C | 6.07053200  | -4.80594600 | 1.46101200  |
| C | 4.49613800  | -4.54693900 | -0.37360000 |
| C | 7.45114200  | -3.73243200 | 3.66444300  |
| H | 6.43213300  | -1.89322500 | 3.24427400  |
| C | 6.97204100  | -5.60644300 | 2.21100400  |



|   |             |             |             |
|---|-------------|-------------|-------------|
| C | 5.37138000  | -5.33026300 | 0.34252100  |
| H | 3.94777300  | -4.93180200 | -1.22464800 |
| C | 7.64704700  | -5.08293600 | 3.28952800  |
| H | 7.99237500  | -3.32805800 | 4.51372300  |
| H | 7.11668400  | -6.64061800 | 1.91391200  |
| H | 5.53437300  | -6.36467400 | 0.05848100  |
| H | 8.33430300  | -5.70323400 | 3.85559200  |
| S | 3.78787500  | -1.68683200 | -2.02009600 |
| O | 3.95408800  | -2.63103700 | -3.11924100 |
| O | 4.83190900  | -0.71329000 | -1.72934700 |
| C | 3.52366100  | 1.42447600  | 3.35599700  |
| H | 4.22725400  | 1.11113300  | 4.13106600  |
| H | 3.41769300  | 2.50453900  | 3.42646000  |
| C | 2.20005900  | 0.68175500  | 3.52208400  |
| H | 1.80970200  | 0.93072300  | 4.51545500  |
| H | 2.41485600  | -0.39314900 | 3.53170500  |
| C | 1.14976900  | 0.96666000  | 2.44927400  |
| H | 0.95006200  | 2.32010100  | 2.46100000  |
| H | 1.50014000  | 0.79343000  | 1.42930000  |
| C | -0.16679100 | 0.52074900  | 2.67905500  |
| H | -0.52024300 | 0.50608500  | 3.71192100  |
| C | -1.08509300 | 0.17381900  | 1.68946500  |
| H | -0.74033600 | 0.07811700  | 0.66586200  |
| C | -2.40696400 | -0.09110600 | 2.03509800  |
| H | -2.69713800 | 0.04597600  | 3.07470400  |
| C | -4.79872200 | -0.51266300 | 1.73113500  |
| C | -3.31468100 | -0.63048600 | -0.22225300 |
| C | -5.64661400 | -0.36649900 | 0.45739000  |
| H | -4.92557900 | 0.33283200  | 2.40842100  |
| H | -5.01673800 | -1.43151000 | 2.27948400  |
| C | -4.64131800 | 0.02639600  | -0.64213900 |
| H | -2.45578900 | -0.05878500 | -0.55802800 |
| H | -6.13890400 | -1.30880600 | 0.21737100  |
| H | -6.41786900 | 0.39203700  | 0.58497700  |
| H | -4.95741500 | -0.28427700 | -1.63965400 |
| H | -4.50723600 | 1.11179200  | -0.65538400 |
| N | -3.39023400 | -0.52219300 | 1.25094000  |
| C | -3.14241900 | -2.06276200 | -0.81980300 |
| H | -3.27191300 | -1.88360900 | -1.89061500 |
| C | -4.23300400 | -3.03547100 | -0.40415700 |
| C | -4.27244800 | -3.58310500 | 0.88005400  |
| C | -5.24569200 | -3.37140100 | -1.30526800 |
| C | -5.33682300 | -4.39344700 | 1.27013500  |
| H | -3.48501300 | -3.36777000 | 1.59180100  |

|   |             |             |             |
|---|-------------|-------------|-------------|
| C | -6.29499200 | -4.20496800 | -0.91543200 |
| H | -5.22028000 | -2.97137100 | -2.31310000 |
| C | -6.36104200 | -4.71037100 | 0.38084800  |
| H | -7.18430700 | -5.34172100 | 0.68796000  |
| C | -1.76570800 | -2.69357200 | -0.67099700 |
| C | -1.06951100 | -2.75832700 | 0.53894200  |
| C | -1.18818800 | -3.28413800 | -1.79932400 |
| C | 0.17852900  | -3.37598500 | 0.60653100  |
| H | -1.48028000 | -2.32623600 | 1.43795100  |
| C | 0.03829600  | -3.94232600 | -1.71299100 |
| H | -1.70215500 | -3.23152800 | -2.75265500 |
| C | 0.73262300  | -3.99693500 | -0.50883700 |
| H | 1.68575700  | -4.50049700 | -0.44240500 |
| O | 3.32319300  | -2.45515900 | -0.65692200 |
| C | 2.14942500  | -0.78643400 | -2.27967100 |
| F | 2.45321900  | 0.36432800  | -2.87396700 |
| F | 1.39027500  | -1.52175500 | -3.08237700 |
| F | 1.52382200  | -0.56667100 | -1.13216400 |
| C | -0.19932700 | 4.47515100  | 2.06868700  |
| C | 1.17246200  | 4.01524000  | 4.02535300  |
| C | 0.19842100  | 5.15282400  | 4.33200700  |
| C | -0.93992200 | 4.88653600  | 3.34711500  |
| H | 0.15897100  | 5.37851900  | 1.56340800  |
| H | 0.90886500  | 3.11626800  | 4.59242100  |
| H | 2.21478000  | 4.26089900  | 4.23356300  |
| H | -0.12163500 | 5.15104500  | 5.37614700  |
| H | 0.66364700  | 6.12037700  | 4.11725400  |
| H | -1.56552600 | 4.05634700  | 3.69668600  |
| H | -1.58607900 | 5.74898000  | 3.17825500  |
| N | 0.99299700  | 3.71329200  | 2.56944000  |
| H | 1.83439500  | 3.94777400  | 2.04288000  |
| C | -1.05728900 | 3.64431600  | 1.10720000  |
| H | -1.26424000 | 2.69644400  | 1.61006600  |
| C | -2.40007000 | 4.30842600  | 0.85280300  |
| C | -3.58097400 | 3.65938400  | 1.22013800  |
| C | -2.47727100 | 5.55068400  | 0.22060800  |
| C | -4.81822500 | 4.24554300  | 0.95222400  |
| H | -3.53010800 | 2.69575400  | 1.71497300  |
| C | -3.71836000 | 6.13777900  | -0.02663100 |
| H | -1.56838300 | 6.05908700  | -0.08582500 |
| C | -4.89876200 | 5.49098400  | 0.33096700  |
| H | -5.86026600 | 5.94506200  | 0.12821100  |
| C | -0.41675600 | 3.30683300  | -0.23120300 |
| C | -1.08810200 | 2.38376600  | -1.03941400 |

|   |             |             |             |
|---|-------------|-------------|-------------|
| C | 0.76144100  | 3.88008800  | -0.70888100 |
| C | -0.58415500 | 2.02291700  | -2.28454300 |
| H | -2.02013500 | 1.95809300  | -0.68823500 |
| C | 1.25236400  | 3.52645900  | -1.96839100 |
| H | 1.31863900  | 4.59073200  | -0.11248200 |
| C | 0.58854800  | 2.60095600  | -2.76632300 |
| H | 0.98248200  | 2.32315900  | -3.73435900 |
| C | -3.75182500 | 7.47566300  | -0.70926100 |
| C | -6.08123000 | 3.49665700  | 1.25902400  |
| C | 2.50594600  | 4.16509300  | -2.49277900 |
| C | -1.27092600 | 0.94326500  | -3.06666200 |
| F | -5.00346100 | 7.95835600  | -0.84364500 |
| F | -3.21025500 | 7.41196900  | -1.94865800 |
| F | -3.03506200 | 8.39868500  | -0.02525000 |
| F | -7.09775600 | 4.31577300  | 1.59428900  |
| F | -5.92022900 | 2.61419000  | 2.27367800  |
| F | -6.49952700 | 2.77678900  | 0.18398200  |
| F | 3.20936200  | 3.31882900  | -3.28306900 |
| F | 2.23816100  | 5.26001800  | -3.24446300 |
| F | 3.33306900  | 4.57049000  | -1.50278300 |
| F | -2.62077900 | 1.04369100  | -3.00623300 |
| F | -0.92180900 | 0.93496700  | -4.36562100 |
| F | -0.96595800 | -0.29050400 | -2.56986400 |
| C | -7.39071400 | -4.49371000 | -1.90062300 |
| C | -5.38606800 | -4.85352400 | 2.69726000  |
| F | -6.89763600 | -4.80170000 | -3.12210300 |
| F | -8.19762300 | -3.41778800 | -2.07243300 |
| F | -8.17663900 | -5.51904400 | -1.51231000 |
| F | -6.34594600 | -5.77265700 | 2.91761400  |
| F | -4.20984300 | -5.38900400 | 3.09650600  |
| F | -5.63296900 | -3.81117000 | 3.53546400  |
| C | 0.59731500  | -4.61682500 | -2.93219900 |
| C | 0.98278900  | -3.26643900 | 1.86771500  |
| F | 0.02891700  | -5.82911100 | -3.14052900 |
| F | 1.93079800  | -4.82241400 | -2.83819300 |
| F | 0.38070000  | -3.89152900 | -4.05205700 |
| F | 0.20486800  | -3.21608400 | 2.97291100  |
| F | 1.84664300  | -4.29197200 | 2.02299400  |
| F | 1.72710100  | -2.12859900 | 1.86935400  |

C

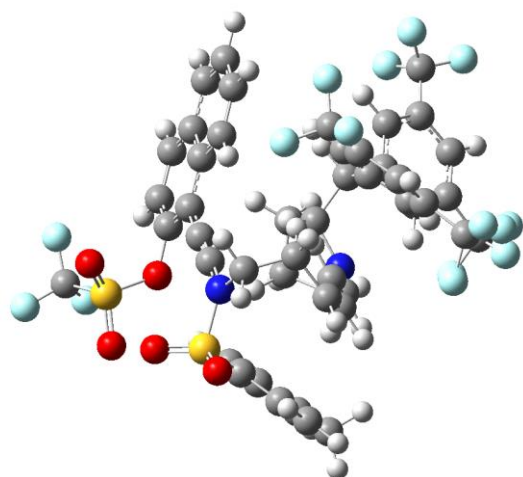

|   |             |             |             |
|---|-------------|-------------|-------------|
| N | -3.40541500 | -2.29865700 | 0.82567700  |
| S | -4.45471600 | -2.56573000 | -0.51722600 |
| O | -5.52395600 | -1.56731700 | -0.40023400 |
| O | -4.76861400 | -3.99863700 | -0.48321800 |
| C | -3.51358000 | -2.19448900 | -1.97372900 |
| C | -3.02090300 | -3.24396000 | -2.75011400 |
| C | -3.30624000 | -0.86072000 | -2.32927700 |
| C | -2.30540400 | -2.94162800 | -3.90290500 |
| H | -3.19759900 | -4.27104100 | -2.45742700 |
| C | -2.58183800 | -0.58229200 | -3.48400400 |
| H | -3.71516000 | -0.05837800 | -1.73450600 |
| C | -2.06837700 | -1.61214600 | -4.28313300 |
| H | -1.92283800 | -3.75009500 | -4.51825400 |
| H | -2.42010800 | 0.45172300  | -3.77039200 |
| C | -1.25826200 | -1.30723400 | -5.51334800 |
| H | -0.19317600 | -1.49239000 | -5.32846300 |
| H | -1.55416400 | -1.94616800 | -6.35074500 |
| H | -1.36836900 | -0.26338200 | -5.81635800 |
| C | -3.01583500 | -1.03977500 | 1.02993000  |
| C | -2.68982600 | 0.12032400  | 1.19308400  |
| C | -2.27927400 | 1.45919800  | 1.38841500  |
| C | -1.38691200 | 1.80781600  | 2.46338100  |
| C | -2.70133800 | 2.48205500  | 0.55157500  |
| C | -0.94878900 | 0.84202300  | 3.40053500  |
| C | -0.93417800 | 3.15933100  | 2.59128100  |
| C | -2.26526000 | 3.81216200  | 0.67080900  |
| C | -0.08878100 | 1.19100600  | 4.41943500  |
| H | -1.29709900 | -0.17898000 | 3.30565600  |

|   |             |             |             |
|---|-------------|-------------|-------------|
| C | -0.03514300 | 3.48136800  | 3.64171300  |
| C | -1.38686800 | 4.14509400  | 1.67409800  |
| H | -2.61726800 | 4.54687700  | -0.04293600 |
| C | 0.38039700  | 2.51996600  | 4.53554900  |
| H | 0.24317900  | 0.43603000  | 5.12419400  |
| H | 0.31295300  | 4.50612000  | 3.72826800  |
| H | -1.03037600 | 5.16457600  | 1.77476000  |
| H | 1.06476900  | 2.78027300  | 5.33636200  |
| S | -5.17246600 | 2.11783600  | -0.29663900 |
| O | -5.49422700 | 1.73213000  | 1.06859200  |
| O | -5.70599000 | 1.43599500  | -1.46364600 |
| C | -2.93746400 | -3.40610000 | 1.70027600  |
| H | -3.16067500 | -3.10692200 | 2.72839400  |
| H | -3.55028200 | -4.27305400 | 1.45741600  |
| C | -1.44594100 | -3.70971400 | 1.53096500  |
| H | -1.19384000 | -4.46218600 | 2.28949800  |
| H | -0.88200600 | -2.81326200 | 1.79145500  |
| C | -1.09469000 | -4.19500500 | 0.15606000  |
| H | -1.38406100 | -5.21520000 | -0.08679200 |
| C | -0.51450600 | -3.44066100 | -0.80056300 |
| H | -0.34690500 | -3.89266200 | -1.77618800 |
| C | -0.09000500 | -2.06827000 | -0.65809700 |
| H | -0.13876800 | -1.62651900 | 0.32712600  |
| C | 0.39447100  | -1.34315500 | -1.69306800 |
| H | 0.41757100  | -1.78444400 | -2.68617400 |
| C | 0.73944200  | 0.81092600  | -2.82828900 |
| C | 0.89145000  | 0.73710100  | -0.41350900 |
| C | -0.01585400 | 2.01276500  | -2.26004000 |
| H | 0.20054500  | 0.28264600  | -3.61477100 |
| H | 1.71217100  | 1.12257200  | -3.23006300 |
| C | 0.65280800  | 2.18288000  | -0.89308400 |
| H | 0.04030200  | 0.41508200  | 0.19547500  |
| H | 0.06225500  | 2.90185800  | -2.89103300 |
| H | -1.07548100 | 1.76166400  | -2.13851900 |
| H | 1.60801800  | 2.70360600  | -1.01240800 |
| H | 0.05351700  | 2.74274700  | -0.17608900 |
| N | 0.92415300  | -0.06777800 | -1.65289700 |
| C | 2.15591000  | 0.61747000  | 0.49433600  |
| H | 1.93338200  | 1.27475000  | 1.34197200  |
| C | 3.43036100  | 1.14038500  | -0.14008200 |
| C | 3.85444300  | 0.74142600  | -1.41059800 |
| C | 4.21663000  | 2.06120500  | 0.56006700  |
| C | 5.01893900  | 1.26708600  | -1.97006500 |
| H | 3.25865900  | 0.03745700  | -1.97550600 |

|   |             |             |             |
|---|-------------|-------------|-------------|
| C | 5.38995800  | 2.56878700  | 0.00211000  |
| H | 3.90819000  | 2.38389400  | 1.54889700  |
| C | 5.80140100  | 2.18216700  | -1.27294100 |
| H | 6.70671400  | 2.58409700  | -1.70886800 |
| C | 2.30258400  | -0.78463800 | 1.06472800  |
| C | 2.87407500  | -1.83843300 | 0.34688300  |
| C | 1.74553600  | -1.05864000 | 2.31357700  |
| C | 2.83178100  | -3.13768700 | 0.84884400  |
| H | 3.32959700  | -1.66353200 | -0.61906900 |
| C | 1.70150200  | -2.36302000 | 2.80943300  |
| H | 1.31553300  | -0.25041900 | 2.89071600  |
| C | 2.23231500  | -3.41930900 | 2.07538700  |
| H | 2.18481500  | -4.43394900 | 2.44737100  |
| O | -3.54968200 | 2.16890100  | -0.53794000 |
| C | -5.62310200 | 3.92958600  | -0.48104200 |
| F | -5.02525400 | 4.42650600  | -1.55949800 |
| F | -5.23585900 | 4.59616100  | 0.60225900  |
| F | -6.94254000 | 4.00633700  | -0.61478500 |
| C | 6.17626700  | 3.59783000  | 0.76125300  |
| C | 5.38534900  | 0.82622300  | -3.35632400 |
| F | 5.66925700  | 4.84387100  | 0.58854600  |
| F | 6.16578900  | 3.36031100  | 2.09272800  |
| F | 7.46827600  | 3.64573000  | 0.37058800  |
| F | 6.52319200  | 1.39461800  | -3.80341600 |
| F | 5.54992200  | -0.51601000 | -3.42804000 |
| F | 4.40687200  | 1.13598300  | -4.24602600 |
| C | 1.04050000  | -2.60259000 | 4.13482500  |
| C | 3.35030300  | -4.25115200 | -0.01184000 |
| F | 3.53766600  | -5.39609900 | 0.67870700  |
| F | 4.53174800  | -3.93152700 | -0.59136600 |
| F | 2.49484400  | -4.53761900 | -1.02517700 |
| F | 1.61671200  | -1.87729800 | 5.12496800  |
| F | 1.07634700  | -3.89655000 | 4.50903900  |
| F | -0.27128100 | -2.23485600 | 4.12324900  |

**TS<sub>R-D</sub>**

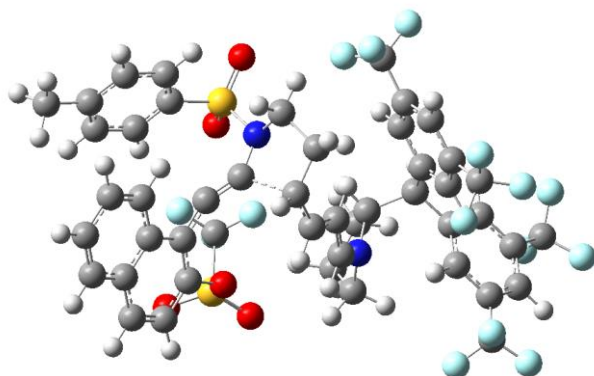

|   |             |             |             |
|---|-------------|-------------|-------------|
| N | -2.45497800 | 1.67184400  | -0.39687000 |
| S | -3.19351600 | 1.82296900  | -1.92251600 |
| O | -2.73245500 | 0.69579900  | -2.74111800 |
| O | -2.89521800 | 3.19649200  | -2.36102000 |
| C | -4.94581000 | 1.67005700  | -1.67332700 |
| C | -5.64642000 | 2.74784700  | -1.13184100 |
| C | -5.57767900 | 0.45513100  | -1.94847200 |
| C | -7.00764900 | 2.59996100  | -0.86879200 |
| H | -5.14481500 | 3.68727500  | -0.92992400 |
| C | -6.93689900 | 0.33283900  | -1.68948600 |
| H | -5.01129200 | -0.37174000 | -2.35531000 |
| C | -7.66998000 | 1.39637200  | -1.14121900 |
| H | -7.56289400 | 3.43278100  | -0.44886900 |
| H | -7.43620200 | -0.60851700 | -1.89713500 |
| C | -9.13292100 | 1.22488000  | -0.83687100 |
| H | -9.69592300 | 0.97937100  | -1.74387300 |
| H | -9.28249400 | 0.40130100  | -0.13057800 |
| H | -9.56114800 | 2.13149100  | -0.40304500 |
| C | -2.83511800 | 0.58025800  | 0.40343900  |
| C | -3.64496700 | -0.38769400 | 0.39466200  |
| C | -4.22015300 | -1.49433200 | 1.02849700  |
| C | -5.54344000 | -1.37979800 | 1.62233300  |
| C | -3.61637200 | -2.75269400 | 1.12032500  |
| C | -6.23995800 | -0.14905000 | 1.60710100  |
| C | -6.15845600 | -2.51543700 | 2.23650900  |
| C | -4.20957600 | -3.86821400 | 1.72977300  |
| C | -7.49260900 | -0.03480400 | 2.17429400  |
| H | -5.77089200 | 0.70580700  | 1.13492800  |
| C | -7.44967700 | -2.36765100 | 2.80797600  |
| C | -5.46900800 | -3.75930200 | 2.27296000  |

|   |             |             |             |
|---|-------------|-------------|-------------|
| H | -3.65884900 | -4.80078000 | 1.77446000  |
| C | -8.10417700 | -1.15510700 | 2.77969200  |
| H | -8.01160300 | 0.91794900  | 2.14869200  |
| H | -7.91157700 | -3.23375800 | 3.27305100  |
| H | -5.94014800 | -4.61468200 | 2.74525300  |
| H | -9.09096900 | -1.05860400 | 3.22188500  |
| S | -1.91456100 | -3.76919700 | -0.63816000 |
| O | -2.99299500 | -4.68939600 | -0.97483400 |
| O | -0.54610000 | -4.22790900 | -0.43962200 |
| C | -2.32743500 | 2.89475500  | 0.43015400  |
| H | -1.94670300 | 3.71228200  | -0.17253400 |
| H | -3.30524100 | 3.17056100  | 0.84501200  |
| C | -1.35838000 | 2.47390600  | 1.53678300  |
| H | -1.46198000 | 3.14279900  | 2.39614200  |
| H | -0.33709100 | 2.56495000  | 1.16890000  |
| C | -1.65471500 | 1.03803300  | 1.93241700  |
| H | -2.36270500 | 0.90955800  | 2.74668200  |
| C | -0.70789100 | 0.01094000  | 1.78549400  |
| H | -0.92480500 | -0.91990700 | 2.30743000  |
| C | 0.37500300  | -0.01807600 | 0.89542900  |
| H | 0.61721500  | 0.85916100  | 0.31207700  |
| C | 1.03982200  | -1.21105200 | 0.67497400  |
| H | 0.77700900  | -2.06700400 | 1.29086500  |
| C | 2.39139100  | -2.85692600 | -0.54457300 |
| C | 2.30220700  | -0.57810700 | -1.37898200 |
| C | 2.22743500  | -2.93764600 | -2.06058100 |
| H | 1.76549600  | -3.55626200 | 0.00748200  |
| H | 3.43416400  | -3.00706100 | -0.24600700 |
| C | 2.67878300  | -1.54686500 | -2.52792000 |
| H | 1.39679000  | -0.01670100 | -1.62779000 |
| H | 2.81958700  | -3.74300300 | -2.50050900 |
| H | 1.17657600  | -3.10625800 | -2.30689300 |
| H | 3.76135700  | -1.53760000 | -2.68161400 |
| H | 2.20751900  | -1.23731000 | -3.46265200 |
| N | 1.97772900  | -1.47193000 | -0.24828000 |
| C | 3.44869800  | 0.45626200  | -1.12222200 |
| H | 3.64666200  | 0.85432700  | -2.12292100 |
| C | 4.73446100  | -0.18987200 | -0.64954900 |
| C | 4.80633800  | -0.92027700 | 0.54039900  |
| C | 5.89025400  | -0.07798000 | -1.42888100 |
| C | 5.99703900  | -1.53765900 | 0.92371700  |
| H | 3.93140500  | -1.02281600 | 1.16938100  |
| C | 7.08058900  | -0.68801600 | -1.03330800 |
| H | 5.85989900  | 0.49081400  | -2.35183200 |



|   |             |             |             |
|---|-------------|-------------|-------------|
| C | 7.14459000  | -1.43122900 | 0.14433900  |
| H | 8.06634500  | -1.91052800 | 0.44812600  |
| C | 3.00153900  | 1.65150400  | -0.29220900 |
| C | 3.37208300  | 1.86326900  | 1.03468200  |
| C | 2.14976000  | 2.58327300  | -0.90207400 |
| C | 2.88690900  | 2.96875600  | 1.73893800  |
| H | 4.03958400  | 1.17748000  | 1.53999500  |
| C | 1.67188800  | 3.68152700  | -0.19412100 |
| H | 1.84892900  | 2.43837100  | -1.93418000 |
| C | 2.03487200  | 3.88644000  | 1.13822800  |
| H | 1.65439500  | 4.73488800  | 1.69151200  |
| O | -2.27077400 | -2.87391100 | 0.67358500  |
| C | -1.87438400 | -2.46073400 | -1.97437200 |
| F | -1.10949000 | -1.44979200 | -1.58550100 |
| F | -3.11752600 | -2.06120800 | -2.20689100 |
| F | -1.36482100 | -3.01303100 | -3.07661500 |
| C | 3.30200300  | 3.13051800  | 3.17251200  |
| C | 0.77736800  | 4.67283700  | -0.88001400 |
| C | 8.28757200  | -0.59778300 | -1.92236500 |
| C | 5.98679400  | -2.36687100 | 2.17381200  |
| F | 9.44034500  | -0.71411800 | -1.22778300 |
| F | 8.33624500  | 0.57503800  | -2.59247500 |
| F | 8.29485700  | -1.57917000 | -2.85780800 |
| F | 7.22106600  | -2.75284500 | 2.55407500  |
| F | 5.43232000  | -1.69918800 | 3.21249900  |
| F | 5.24894000  | -3.49453700 | 2.00748700  |
| F | 2.75148500  | 4.21638900  | 3.75315200  |
| F | 4.64596300  | 3.24921500  | 3.29228500  |
| F | 2.94663500  | 2.05442600  | 3.91501300  |
| F | 1.47971800  | 5.64876800  | -1.50206400 |
| F | -0.05357700 | 5.28947900  | -0.00509800 |
| F | 0.00365800  | 4.08789300  | -1.82081100 |

# TS<sub>S-D</sub>

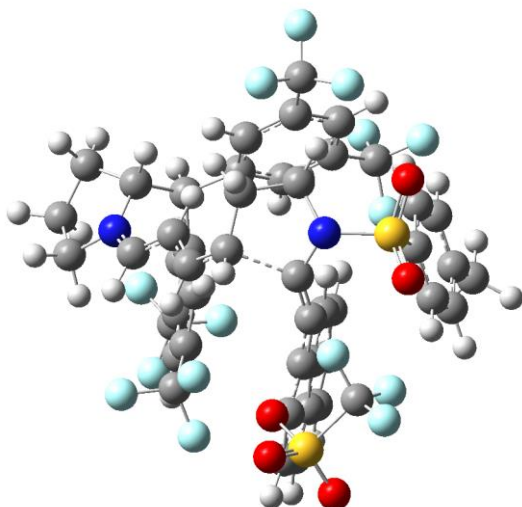

|   |             |             |             |
|---|-------------|-------------|-------------|
| N | 3.17807600  | 1.75212600  | 1.40026600  |
| S | 3.93570400  | 2.50945700  | 0.08119200  |
| O | 5.16537800  | 1.76156000  | -0.20438700 |
| O | 4.03643700  | 3.92767100  | 0.46960400  |
| C | 2.86883900  | 2.39288500  | -1.33603400 |
| C | 1.78945300  | 3.26949000  | -1.44536500 |
| C | 3.12997700  | 1.43277500  | -2.31682600 |
| C | 0.96727200  | 3.18115700  | -2.56714000 |
| H | 1.60191800  | 4.01534200  | -0.68250900 |
| C | 2.29559300  | 1.36120800  | -3.42484000 |
| H | 3.97089100  | 0.76138600  | -2.20849800 |
| C | 1.20329000  | 2.23007900  | -3.56721100 |
| H | 0.13893400  | 3.86942500  | -2.67459300 |
| H | 2.48652800  | 0.61279300  | -4.18770300 |
| C | 0.29392800  | 2.11532800  | -4.76002800 |
| H | 0.86754700  | 2.12195000  | -5.69240700 |
| H | -0.25732700 | 1.16889500  | -4.72567700 |
| H | -0.43303500 | 2.92870400  | -4.79123400 |
| C | 2.67132000  | 0.44100300  | 1.21192900  |
| C | 2.60175000  | -0.38175600 | 0.25542400  |
| C | 2.16143200  | -1.52267900 | -0.40987500 |
| C | 1.00532500  | -1.45502800 | -1.29578900 |
| C | 2.79605900  | -2.76971100 | -0.32896000 |
| C | 0.22904800  | -0.27909700 | -1.39692900 |
| C | 0.62814600  | -2.59792000 | -2.06827600 |
| C | 2.41377200  | -3.89816300 | -1.06471500 |
| C | -0.87613200 | -0.22592500 | -2.22191100 |
| H | 0.51854000  | 0.58922900  | -0.81659500 |

|   |             |             |             |
|---|-------------|-------------|-------------|
| C | -0.51230900 | -2.51183400 | -2.90886700 |
| C | 1.36004000  | -3.81024800 | -1.94596700 |
| H | 2.94867700  | -4.82937900 | -0.92212800 |
| C | -1.25089200 | -1.35129100 | -2.98608700 |
| H | -1.44953700 | 0.68760600  | -2.29493800 |
| H | -0.79874000 | -3.38939100 | -3.48096600 |
| H | 1.05380000  | -4.67562300 | -2.52333000 |
| H | -2.12639200 | -1.30209400 | -3.62624300 |
| S | 5.35505200  | -3.20418500 | 0.25348800  |
| O | 5.45952400  | -3.90203700 | -1.02201300 |
| O | 5.98005000  | -3.71745300 | 1.46435900  |
| C | 2.20139800  | 2.54705500  | 2.17421800  |
| H | 2.60554200  | 3.53040200  | 2.39688600  |
| H | 1.27694700  | 2.65144900  | 1.59691300  |
| C | 1.96887900  | 1.69253300  | 3.41765900  |
| H | 1.00927900  | 1.94971600  | 3.87082600  |
| H | 2.75087100  | 1.90360400  | 4.15196600  |
| C | 2.04758400  | 0.21746300  | 3.02122300  |
| H | 2.96159600  | -0.27811600 | 3.34216500  |
| C | 0.90878700  | -0.60815300 | 3.12752000  |
| H | 1.08124800  | -1.68383800 | 3.14489600  |
| C | -0.42472800 | -0.19185700 | 3.14732100  |
| H | -0.66159400 | 0.85647800  | 3.02445900  |
| C | -1.43970100 | -1.11758500 | 3.34055000  |
| H | -1.16114500 | -2.15526900 | 3.50973300  |
| C | -3.70215400 | -2.01087900 | 3.61940000  |
| C | -3.45167400 | 0.35260200  | 3.01914300  |
| C | -5.08732100 | -1.36308400 | 3.51959100  |
| H | -3.50192600 | -2.39191200 | 4.62528100  |
| H | -3.55171400 | -2.82541300 | 2.90566100  |
| C | -4.80062600 | 0.13191200  | 3.72646200  |
| H | -2.90999500 | 1.17384300  | 3.48505200  |
| H | -5.52108800 | -1.53953500 | 2.53312600  |
| H | -5.77438700 | -1.76463800 | 4.26646400  |
| H | -5.58485800 | 0.78343900  | 3.33709400  |
| H | -4.67844200 | 0.34628800  | 4.79254800  |
| N | -2.75684600 | -0.90691000 | 3.33290900  |
| C | -3.64199900 | 0.64966800  | 1.47654600  |
| H | -4.66653400 | 1.02926600  | 1.41099700  |
| C | -3.62584500 | -0.60907300 | 0.62452600  |
| C | -2.49993400 | -1.44019700 | 0.57199500  |
| C | -4.78969500 | -1.02502000 | -0.02214700 |
| C | -2.60062000 | -2.72250900 | 0.04233700  |
| H | -1.56116600 | -1.11603900 | 0.99516200  |

|   |             |             |             |
|---|-------------|-------------|-------------|
| C | -4.84108600 | -2.26397000 | -0.66961900 |
| H | -5.67217700 | -0.39439800 | 0.00028200  |
| C | -3.76458600 | -3.14160800 | -0.60375000 |
| H | -3.83452500 | -4.13568500 | -1.02765300 |
| C | -2.81351100 | 1.79108700  | 0.87907300  |
| C | -3.00198300 | 2.07093700  | -0.48034800 |
| C | -2.02219500 | 2.67152700  | 1.62152800  |
| C | -2.43539500 | 3.19990000  | -1.07060100 |
| H | -3.62592200 | 1.41662700  | -1.07942000 |
| C | -1.43075000 | 3.78286500  | 1.01781700  |
| H | -1.87199200 | 2.53291800  | 2.68236900  |
| C | -1.63860300 | 4.06802500  | -0.32949600 |
| H | -1.20232200 | 4.94830700  | -0.78410700 |
| O | 3.80748800  | -2.91304400 | 0.66215900  |
| C | 6.00075000  | -1.47279600 | -0.01928100 |
| F | 5.74643700  | -0.74057200 | 1.05415900  |
| F | 5.41133800  | -0.96863300 | -1.09846900 |
| F | 7.31558700  | -1.54597000 | -0.21847600 |
| C | -2.78811500 | 3.50910600  | -2.49813100 |
| C | -0.63309200 | 4.75102600  | 1.84477700  |
| C | -6.08197500 | -2.64195000 | -1.42273600 |
| C | -1.54637700 | -3.73866000 | 0.36962400  |
| F | -6.17387400 | -3.97302300 | -1.62851600 |
| F | -6.12581300 | -2.05137800 | -2.64229500 |
| F | -7.20369300 | -2.25675000 | -0.76976500 |
| F | -1.31651100 | -4.60608600 | -0.63781000 |
| F | -0.37042600 | -3.18799900 | 0.73137800  |
| F | -1.95270000 | -4.49112900 | 1.43402500  |
| F | -2.06439300 | 4.53152100  | -3.00719600 |
| F | -4.09143800 | 3.85186700  | -2.61897300 |
| F | -2.59918500 | 2.44295900  | -3.31466800 |
| F | -1.34059400 | 5.86708800  | 2.13389700  |
| F | 0.48643600  | 5.16344200  | 1.20080900  |
| F | -0.23975700 | 4.21992900  | 3.02577400  |

## R-D

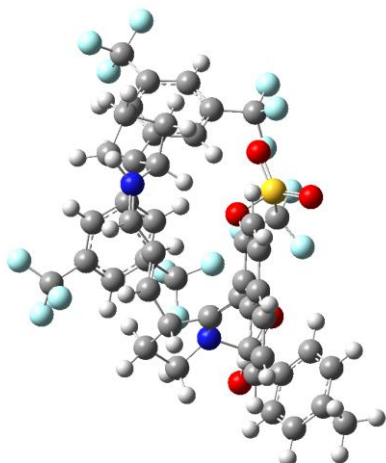

|   |             |             |             |
|---|-------------|-------------|-------------|
| N | -2.57685500 | 1.59743800  | -1.37580700 |
| S | -3.12554900 | 0.83549500  | -2.76863100 |
| O | -2.18975700 | -0.23955700 | -3.12520800 |
| O | -3.35502500 | 1.91934300  | -3.74543800 |
| C | -4.69970100 | 0.10265500  | -2.37318700 |
| C | -5.82728500 | 0.92154800  | -2.30289300 |
| C | -4.76537600 | -1.25026100 | -2.03255300 |
| C | -7.03645600 | 0.37214600  | -1.87743900 |
| H | -5.76626700 | 1.96571400  | -2.58713800 |
| C | -5.98286500 | -1.78167700 | -1.62195500 |
| H | -3.87709200 | -1.86285500 | -2.08453200 |
| C | -7.12928600 | -0.97992400 | -1.52343000 |
| H | -7.91886600 | 1.00222300  | -1.82118600 |
| H | -6.04117500 | -2.83148300 | -1.35122200 |
| C | -8.41632700 | -1.56138300 | -1.00564300 |
| H | -8.64263900 | -2.51787000 | -1.48701600 |
| H | -8.33736600 | -1.75107100 | 0.07139200  |
| H | -9.25793500 | -0.88340000 | -1.16780500 |
| C | -2.63733400 | 0.90517000  | -0.08593400 |
| C | -2.72020700 | -0.40311200 | 0.08805800  |
| C | -2.97688500 | -1.08649700 | 1.29216600  |
| C | -4.30519600 | -1.07819200 | 1.91213200  |
| C | -2.04576900 | -1.91187400 | 1.94409000  |
| C | -5.34656900 | -0.28797100 | 1.37277500  |
| C | -4.57779100 | -1.86514600 | 3.07984000  |
| C | -2.30088800 | -2.67873000 | 3.08550500  |
| C | -6.60061000 | -0.24947300 | 1.95165200  |
| H | -5.14526300 | 0.28614500  | 0.47747000  |
| C | -5.87977900 | -1.81290500 | 3.64640500  |
| C | -3.55394200 | -2.66652800 | 3.65888500  |

|   |             |             |             |
|---|-------------|-------------|-------------|
| H | -1.49362300 | -3.26687700 | 3.51107800  |
| C | -6.86969300 | -1.02273700 | 3.10097400  |
| H | -7.38019900 | 0.36491100  | 1.51207900  |
| H | -6.08218100 | -2.41557300 | 4.52781200  |
| H | -3.76800300 | -3.25259800 | 4.54618600  |
| H | -7.85718700 | -0.99856400 | 3.55250200  |
| S | -0.19107400 | -3.15449500 | 0.52677800  |
| O | -1.14851200 | -4.25363500 | 0.51446900  |
| O | 1.21005400  | -3.35769000 | 0.89129700  |
| C | -2.98443600 | 3.00957700  | -1.20345800 |
| H | -2.54546400 | 3.62998000  | -1.98209300 |
| H | -4.07632300 | 3.11705000  | -1.22986900 |
| C | -2.44814500 | 3.33765700  | 0.18532300  |
| H | -2.95801600 | 4.19024300  | 0.63659600  |
| H | -1.38443000 | 3.56097600  | 0.12331700  |
| C | -2.66123400 | 2.01691800  | 0.97367300  |
| H | -3.65634000 | 2.04332300  | 1.43581200  |
| C | -1.65782700 | 1.87822400  | 2.06283600  |
| H | -1.87308000 | 2.40599600  | 2.99085600  |
| C | -0.49632800 | 1.18901100  | 1.96488500  |
| H | -0.24759300 | 0.65425700  | 1.05832600  |
| C | 0.35784300  | 1.14333500  | 3.09853300  |
| H | 0.03398400  | 1.66388200  | 3.99712200  |
| C | 2.23550800  | 0.45667500  | 4.50318200  |
| C | 2.17467100  | -0.30588700 | 2.17945900  |
| C | 3.31626400  | -0.61083400 | 4.28234800  |
| H | 1.52753400  | 0.18398900  | 5.28744200  |
| H | 2.63932700  | 1.44719800  | 4.72212000  |
| C | 2.83418700  | -1.38485000 | 3.04563700  |
| H | 1.43386100  | -0.70700700 | 1.49285600  |
| H | 4.28362700  | -0.14123800 | 4.08761000  |
| H | 3.42517800  | -1.25250700 | 5.15752800  |
| H | 3.63663900  | -1.90412000 | 2.52340500  |
| H | 2.07395600  | -2.12124900 | 3.31805600  |
| N | 1.48832400  | 0.50522900  | 3.21220100  |
| C | 3.20064500  | 0.58898300  | 1.41108500  |
| H | 3.79665700  | 1.11106000  | 2.16369400  |
| C | 2.48301200  | 1.65758900  | 0.60070800  |
| C | 2.03056400  | 1.42585100  | -0.70224900 |
| C | 2.20055000  | 2.88682700  | 1.19984200  |
| C | 1.30820300  | 2.40273100  | -1.38287800 |
| H | 2.23707000  | 0.48735500  | -1.19818400 |
| C | 1.45478100  | 3.85040700  | 0.52084900  |
| H | 2.54764100  | 3.08730600  | 2.20758900  |

|   |             |             |             |
|---|-------------|-------------|-------------|
| C | 1.00924100  | 3.62245600  | -0.77801600 |
| H | 0.43764100  | 4.37516200  | -1.30611100 |
| C | 4.16607800  | -0.22933400 | 0.57463200  |
| C | 5.52312800  | 0.10669400  | 0.59599200  |
| C | 3.74966700  | -1.28468100 | -0.24096000 |
| C | 6.43914400  | -0.59238900 | -0.18709100 |
| H | 5.86347100  | 0.91795900  | 1.23011000  |
| C | 4.67289000  | -1.97488600 | -1.02882500 |
| H | 2.71038200  | -1.58431600 | -0.26879000 |
| C | 6.02216600  | -1.63722800 | -1.01130400 |
| H | 6.73500800  | -2.17921900 | -1.61913100 |
| O | -0.70515300 | -1.91289500 | 1.45230500  |
| C | -0.14485400 | -2.41597800 | -1.20352100 |
| F | 0.14856300  | -1.11818500 | -1.12972000 |
| F | 0.82107500  | -3.04553700 | -1.87391600 |
| F | -1.30263200 | -2.61458100 | -1.80748900 |
| C | 1.02432800  | 5.08471600  | 1.25607600  |
| C | 0.89136400  | 2.15827900  | -2.80658800 |
| C | 4.16862000  | -3.07663700 | -1.91771700 |
| C | 7.88335500  | -0.18019800 | -0.18728300 |
| F | 8.25774500  | 0.35447400  | 0.99662100  |
| F | 8.70702700  | -1.22119600 | -0.43815800 |
| F | 8.13704200  | 0.75552000  | -1.13389300 |
| F | 3.46204600  | -3.99732200 | -1.22340600 |
| F | 3.33969200  | -2.59409100 | -2.87441300 |
| F | 5.16742900  | -3.72908100 | -2.54848100 |
| F | -0.06318200 | 4.82878200  | 2.03405500  |
| F | 0.68190500  | 6.09085600  | 0.42701100  |
| F | 1.98571700  | 5.54667900  | 2.08585700  |
| F | -0.27337200 | 2.77562000  | -3.10742700 |
| F | 0.74143600  | 0.84527200  | -3.07156800 |
| F | 1.81521000  | 2.63247700  | -3.67953000 |

## S-D

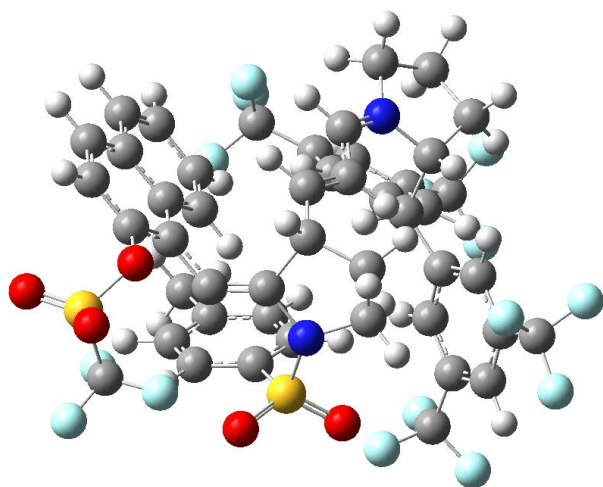

|   |             |             |             |
|---|-------------|-------------|-------------|
| N | 2.30344100  | 2.18992700  | 0.41754000  |
| S | 2.10367400  | 2.41783500  | -1.23576200 |
| O | 3.42799300  | 2.56140800  | -1.85740000 |
| O | 1.14441900  | 3.53529200  | -1.35456300 |
| C | 1.33235500  | 0.96363300  | -1.91219100 |
| C | -0.03129100 | 0.78212300  | -1.69401700 |
| C | 2.08350400  | 0.03551000  | -2.63467900 |
| C | -0.65769600 | -0.34798600 | -2.21693900 |
| H | -0.59491700 | 1.52349500  | -1.14517900 |
| C | 1.44024000  | -1.08081300 | -3.15700100 |
| H | 3.14520300  | 0.18809000  | -2.77497000 |
| C | 0.06664700  | -1.29072800 | -2.95794600 |
| H | -1.72143900 | -0.49335500 | -2.05914000 |
| H | 2.01369800  | -1.81064700 | -3.72021800 |
| C | -0.60063000 | -2.51325900 | -3.52467600 |
| H | -0.50023500 | -2.54043200 | -4.61515900 |
| H | -0.13472300 | -3.42353300 | -3.13389100 |
| H | -1.66254200 | -2.54184900 | -3.27547300 |
| C | 2.80524400  | 0.92895800  | 0.92834100  |
| C | 3.45976500  | 0.01196400  | 0.25928200  |
| C | 3.81556000  | -1.29537000 | 0.62207800  |
| C | 2.86536400  | -2.40210300 | 0.53959300  |
| C | 5.11220800  | -1.66171400 | 1.02034800  |
| C | 1.55158900  | -2.19151400 | 0.06466200  |
| C | 3.25446200  | -3.73044400 | 0.91803300  |
| C | 5.49620000  | -2.94911400 | 1.40196500  |
| C | 0.64589000  | -3.22816700 | -0.02645700 |
| H | 1.26831300  | -1.19427000 | -0.24135500 |



|   |             |             |             |
|---|-------------|-------------|-------------|
| C | 2.28736900  | -4.77184900 | 0.84096700  |
| C | 4.58032600  | -3.98213600 | 1.35843600  |
| H | 6.51277800  | -3.11650000 | 1.74014500  |
| C | 1.01176800  | -4.53105400 | 0.37976200  |
| H | -0.33005100 | -3.05069400 | -0.45631000 |
| H | 2.58476000  | -5.77293000 | 1.14097100  |
| H | 4.86534800  | -4.98598500 | 1.65440100  |
| H | 0.28715100  | -5.33659800 | 0.31195000  |
| S | 7.28182900  | -0.48109400 | 0.08494300  |
| O | 7.64100100  | -1.78033400 | -0.47314300 |
| O | 8.26945500  | 0.37765400  | 0.72660000  |
| C | 1.30118300  | 2.78154500  | 1.32550800  |
| H | 1.26890500  | 3.86216700  | 1.21192400  |
| H | 0.30105900  | 2.38138200  | 1.12582300  |
| C | 1.82519500  | 2.34091900  | 2.69095700  |
| H | 1.04481300  | 2.37528500  | 3.45380500  |
| H | 2.63153500  | 3.00921100  | 3.00109800  |
| C | 2.40582800  | 0.93127100  | 2.47015600  |
| H | 3.32948300  | 0.77487400  | 3.03089400  |
| C | 1.49245200  | -0.20141100 | 2.71596700  |
| H | 1.95687900  | -1.17529000 | 2.84670800  |
| C | 0.12895000  | -0.13421500 | 2.73433100  |
| H | -0.35995500 | 0.82173700  | 2.59829000  |
| C | -0.66075600 | -1.28307800 | 2.96541400  |
| H | -0.17738300 | -2.23762400 | 3.15772300  |
| C | -2.80489800 | -2.45186300 | 3.35603200  |
| C | -2.78392300 | -0.08561600 | 2.65103400  |
| C | -4.25270600 | -1.98177600 | 3.15910500  |
| H | -2.59451900 | -2.71495600 | 4.39586400  |
| H | -2.53659800 | -3.29819600 | 2.71987600  |
| C | -4.18009500 | -0.44224300 | 3.17870500  |
| H | -2.37641900 | 0.75417800  | 3.20893000  |
| H | -4.64513500 | -2.34214900 | 2.20769500  |
| H | -4.89822300 | -2.36433700 | 3.95121800  |
| H | -4.97052800 | 0.02374100  | 2.58842900  |
| H | -4.26702800 | -0.07357800 | 4.20376700  |
| N | -1.97665500 | -1.27709900 | 2.99658700  |
| C | -2.64193500 | 0.19237600  | 1.11715700  |
| H | -1.59755400 | -0.04361500 | 0.87791000  |
| C | -2.76394200 | 1.65487600  | 0.71104300  |
| C | -2.95421700 | 1.97472000  | -0.64059000 |
| C | -2.44751800 | 2.69432100  | 1.58803300  |
| C | -2.78269200 | 3.27785400  | -1.09866200 |
| H | -3.18500800 | 1.19363900  | -1.35423700 |

|   |             |             |             |
|---|-------------|-------------|-------------|
| C | -2.28818400 | 4.00173700  | 1.12220900  |
| H | -2.28065200 | 2.50654900  | 2.64052200  |
| C | -2.43806300 | 4.30805300  | -0.22400100 |
| H | -2.27986900 | 5.31530700  | -0.58655400 |
| C | -3.47418900 | -0.79767600 | 0.32980100  |
| C | -2.92742100 | -2.06018100 | 0.09386000  |
| C | -4.79725900 | -0.55790200 | -0.04929600 |
| C | -3.69491500 | -3.08034900 | -0.46467000 |
| H | -1.90500000 | -2.25675000 | 0.38959500  |
| C | -5.55100200 | -1.57359400 | -0.63821400 |
| H | -5.24482700 | 0.41528100  | 0.11536800  |
| C | -5.01545200 | -2.84636300 | -0.83856300 |
| H | -5.61459600 | -3.63453800 | -1.27608300 |
| O | 6.06466100  | -0.60464100 | 1.15516100  |
| C | 6.55127900  | 0.51481300  | -1.32392800 |
| F | 6.01538900  | 1.63008000  | -0.85530300 |
| F | 7.55802400  | 0.81113300  | -2.14958400 |
| F | 5.64940700  | -0.21251100 | -1.97389800 |
| C | -1.87965900 | 5.05130700  | 2.11463900  |
| C | -2.81058400 | 3.54021100  | -2.57718400 |
| C | -6.98935500 | -1.30995400 | -0.98400700 |
| C | -3.06883300 | -4.43456500 | -0.63675300 |
| F | -2.41019300 | -4.81728700 | 0.48900800  |
| F | -3.97285600 | -5.39095500 | -0.91882500 |
| F | -2.14800200 | -4.44865200 | -1.63194200 |
| F | -7.80187300 | -1.50866700 | 0.08238200  |
| F | -7.18381800 | -0.03508800 | -1.38744900 |
| F | -7.43238200 | -2.11924100 | -1.96937200 |
| F | -0.70133600 | 4.72858100  | 2.71250000  |
| F | -2.78545900 | 5.17548400  | 3.11329900  |
| F | -1.72446300 | 6.26571700  | 1.55683200  |
| F | -3.19692000 | 4.80131400  | -2.86546800 |
| F | -3.64656200 | 2.70081700  | -3.22800000 |
| F | -1.58178800 | 3.36986200  | -3.12298200 |

# TS<sub>E</sub>

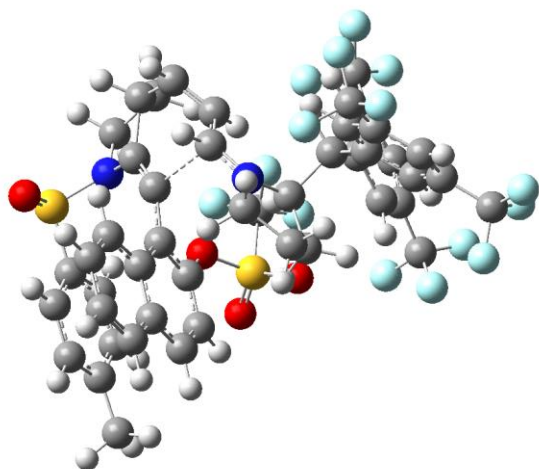

|   |             |             |             |
|---|-------------|-------------|-------------|
| N | -3.96210800 | 0.11119000  | 2.00776300  |
| S | -5.37392900 | -0.71570600 | 1.64596100  |
| O | -6.47451700 | 0.14746800  | 2.11609800  |
| O | -5.29547500 | -2.10250300 | 2.14137700  |
| C | -5.41721900 | -0.77211800 | -0.12842600 |
| C | -5.49704900 | -2.00563500 | -0.77407100 |
| C | -5.39474700 | 0.42588400  | -0.84264000 |
| C | -5.54520200 | -2.03192600 | -2.16337500 |
| H | -5.49942300 | -2.92213200 | -0.19772200 |
| C | -5.43976200 | 0.37770600  | -2.23192500 |
| H | -5.31532500 | 1.37698500  | -0.32804900 |
| C | -5.50750800 | -0.84687200 | -2.91054900 |
| H | -5.58807500 | -2.98743600 | -2.67637900 |
| H | -5.40057300 | 1.30175100  | -2.79886100 |
| C | -5.47370200 | -0.89955600 | -4.41274400 |
| H | -4.47543000 | -1.19867200 | -4.75577300 |
| H | -6.18273000 | -1.63563500 | -4.80314100 |
| H | -5.70108600 | 0.07352200  | -4.85457500 |
| C | -2.72515300 | -0.60027000 | 2.17377300  |
| C | -2.04816800 | -1.32652300 | 1.30156400  |
| C | -2.21725200 | -1.67506000 | -0.07803400 |
| C | -2.26656700 | -3.06106700 | -0.47707300 |
| C | -2.22417500 | -0.74441100 | -1.11067500 |
| C | -2.34253000 | -4.08871400 | 0.49476600  |
| C | -2.22919200 | -3.42005300 | -1.86018700 |
| C | -2.21790100 | -1.07519300 | -2.47570600 |
| C | -2.36610900 | -5.41498700 | 0.11983900  |
| H | -2.38615900 | -3.80622000 | 1.54064300  |

|   |             |             |             |
|---|-------------|-------------|-------------|
| C | -2.24855300 | -4.79464400 | -2.21472800 |
| C | -2.18786100 | -2.39957500 | -2.84579900 |
| H | -2.25879200 | -0.30066300 | -3.23207200 |
| C | -2.31338800 | -5.77267700 | -1.24773300 |
| H | -2.42765000 | -6.19075600 | 0.87650300  |
| H | -2.21653400 | -5.05825700 | -3.26789500 |
| H | -2.16923700 | -2.67169300 | -3.89566300 |
| H | -2.32959600 | -6.82011800 | -1.53168900 |
| S | -1.71872300 | 1.82534000  | -1.57064600 |
| O | -2.72070800 | 2.36987900  | -2.47931400 |
| O | -0.38057800 | 1.50844400  | -2.05281400 |
| C | -4.01774200 | 1.29760900  | 2.92141900  |
| H | -4.26755600 | 2.19004200  | 2.34612500  |
| H | -4.77301100 | 1.15498100  | 3.69666200  |
| C | -2.60763500 | 1.34501200  | 3.53426800  |
| H | -2.62502400 | 1.82561700  | 4.51468200  |
| H | -1.91492800 | 1.88869400  | 2.88778000  |
| C | -2.24708800 | -0.14524400 | 3.61230100  |
| H | -2.93764100 | -0.59623400 | 4.33745500  |
| C | -0.89614500 | -0.73290900 | 3.77597900  |
| H | -0.90862400 | -1.71070300 | 4.25852600  |
| C | -0.10789300 | -0.61651100 | 2.67019800  |
| H | -0.09067200 | 0.32641700  | 2.13082100  |
| C | 0.11979900  | -1.81078600 | 1.90238500  |
| H | -0.06140000 | -2.76241700 | 2.39285400  |
| C | 1.17963900  | -3.14877300 | 0.10200300  |
| C | 1.25120500  | -0.68902600 | 0.03266000  |
| C | 1.92589900  | -2.71406200 | -1.16609000 |
| H | 0.25319000  | -3.67708300 | -0.12999800 |
| H | 1.79321200  | -3.79157200 | 0.74123000  |
| C | 1.52589200  | -1.24248700 | -1.37543700 |
| H | 0.39973900  | -0.00723000 | 0.01441300  |
| H | 3.00421900  | -2.80378800 | -1.02178100 |
| H | 1.64960000  | -3.33489100 | -2.02075000 |
| H | 2.29611500  | -0.68327700 | -1.90886000 |
| H | 0.60291100  | -1.17969500 | -1.95597700 |
| N | 0.88219200  | -1.88236100 | 0.79769900  |
| C | 2.42315100  | 0.07583900  | 0.75538800  |
| H | 2.20963000  | -0.03097200 | 1.82111500  |
| C | 2.34219300  | 1.56011000  | 0.47192200  |
| C | 2.11710900  | 2.42309200  | 1.54700200  |
| C | 2.32429400  | 2.09219900  | -0.82322600 |
| C | 1.87052300  | 3.77979300  | 1.33607100  |
| H | 2.08973800  | 2.02471300  | 2.55549000  |

|   |             |             |             |
|---|-------------|-------------|-------------|
| C | 2.09050000  | 3.45046000  | -1.02455900 |
| H | 2.44802500  | 1.45093900  | -1.68496500 |
| C | 1.85935000  | 4.30781800  | 0.04988700  |
| H | 1.64355800  | 5.35624600  | -0.11607500 |
| C | 3.74986800  | -0.61327600 | 0.52581900  |
| C | 4.65346100  | -0.24662400 | -0.47393600 |
| C | 4.03136700  | -1.74444500 | 1.29764200  |
| C | 5.79078300  | -1.01922200 | -0.71347100 |
| H | 4.48132500  | 0.64113400  | -1.06959400 |
| C | 5.15677700  | -2.52408100 | 1.03727500  |
| H | 3.34904700  | -2.03082300 | 2.09022800  |
| C | 6.04675500  | -2.17332200 | 0.02589900  |
| H | 6.92210000  | -2.77666100 | -0.17635600 |
| O | -2.32480200 | 0.60897600  | -0.69583400 |
| C | -1.61838600 | 2.97590200  | -0.09925100 |
| F | -2.83482600 | 3.13047900  | 0.41485400  |
| F | -0.80247200 | 2.45536400  | 0.81258300  |
| F | -1.15111500 | 4.14587700  | -0.51810000 |
| C | 5.34838800  | -3.77545500 | 1.84190100  |
| C | 6.70715000  | -0.63942900 | -1.84080400 |
| C | 1.42169300  | 4.62673800  | 2.48829900  |
| C | 1.94816000  | 3.99705100  | -2.41488500 |
| F | 5.35968700  | -3.52367100 | 3.17160200  |
| F | 4.33209300  | -4.65243100 | 1.62985100  |
| F | 6.49485700  | -4.41884500 | 1.54372900  |
| F | 6.27373100  | -1.13705700 | -3.02566700 |
| F | 7.96232800  | -1.10448000 | -1.65946500 |
| F | 6.79169200  | 0.70131100  | -1.99396200 |
| F | 1.65585200  | 5.94102500  | 2.28831600  |
| F | 2.01921700  | 4.27933300  | 3.64881900  |
| F | 0.08190500  | 4.49323100  | 2.68584700  |
| F | 2.39409100  | 3.14253800  | -3.35800800 |
| F | 2.62199500  | 5.16029600  | -2.57090600 |
| F | 0.64933600  | 4.26815800  | -2.70675400 |

# TS<sub>E'</sub>

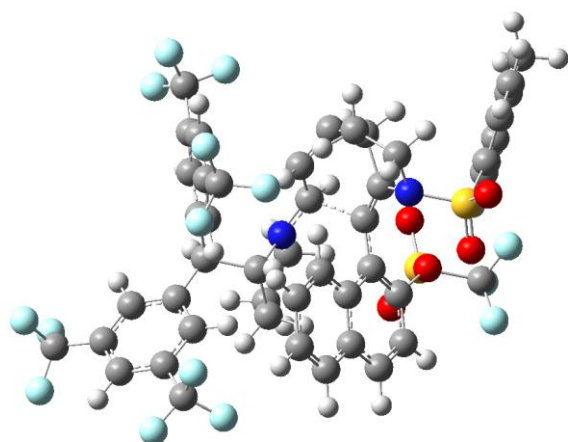

|   |             |             |             |
|---|-------------|-------------|-------------|
| N | 2.91230300  | 1.19660800  | 2.12007900  |
| S | 4.37119300  | 0.41928400  | 2.48556800  |
| O | 4.15134900  | -1.02805600 | 2.37278500  |
| O | 4.81346000  | 0.98343100  | 3.77217600  |
| C | 5.50089000  | 0.91067900  | 1.20494800  |
| C | 6.20042500  | 2.11415900  | 1.32229700  |
| C | 5.56527100  | 0.14449700  | 0.04023200  |
| C | 6.97428300  | 2.54512500  | 0.24848800  |
| H | 6.14916400  | 2.69419800  | 2.23625500  |
| C | 6.34417800  | 0.59260400  | -1.02128600 |
| H | 5.02264000  | -0.78665800 | -0.02196100 |
| C | 7.05498600  | 1.79794200  | -0.93656500 |
| H | 7.52617900  | 3.47655000  | 0.32979900  |
| H | 6.39551700  | -0.00294400 | -1.92772600 |
| C | 7.91390400  | 2.26521700  | -2.08024700 |
| H | 8.93260500  | 1.87063400  | -1.98288000 |
| H | 7.52002000  | 1.91960500  | -3.03965400 |
| H | 7.98681600  | 3.35574600  | -2.10367100 |
| C | 2.41986700  | 1.12869300  | 0.76103200  |
| C | 1.81651300  | 0.09298200  | 0.17714000  |
| C | 1.48831800  | -1.17839700 | 0.78633000  |
| C | 0.43201100  | -1.29061000 | 1.76279400  |
| C | 2.12054400  | -2.35389700 | 0.42448900  |
| C | -0.25502600 | -0.14966000 | 2.25284600  |
| C | 0.04106600  | -2.58350700 | 2.23883500  |
| C | 1.78367400  | -3.62706800 | 0.90944000  |
| C | -1.28493700 | -0.27697100 | 3.15980600  |
| H | 0.03675400  | 0.83030300  | 1.89926800  |

|   |             |             |             |
|---|-------------|-------------|-------------|
| C | -1.03049500 | -2.68065700 | 3.16563100  |
| C | 0.73201300  | -3.74075800 | 1.78754500  |
| H | 2.35566400  | -4.49086800 | 0.59238300  |
| C | -1.67866600 | -1.55483700 | 3.61988800  |
| H | -1.79777200 | 0.60816200  | 3.52028400  |
| H | -1.32988700 | -3.66606600 | 3.50951700  |
| H | 0.43635700  | -4.71349300 | 2.16621700  |
| H | -2.50169800 | -1.64543700 | 4.31875500  |
| S | 3.35457500  | -2.75373300 | -1.90201100 |
| O | 3.61323900  | -1.63119500 | -2.79631000 |
| O | 2.29278300  | -3.71463900 | -2.17770500 |
| C | 2.77209400  | 2.61169500  | 2.61416400  |
| H | 2.26051200  | 2.60022700  | 3.57696900  |
| H | 3.75230700  | 3.07544200  | 2.74675100  |
| C | 1.98406100  | 3.32935000  | 1.50843900  |
| H | 2.20590800  | 4.39861300  | 1.49933900  |
| H | 0.90825800  | 3.19701400  | 1.64121500  |
| C | 2.47972800  | 2.61073100  | 0.24854700  |
| H | 3.53445200  | 2.88263900  | 0.10998500  |
| C | 1.77578000  | 2.56414400  | -1.06034700 |
| H | 2.45100800  | 2.36326700  | -1.89322100 |
| C | 0.63013600  | 1.83198800  | -1.03043100 |
| H | -0.06133800 | 1.94441900  | -0.20162000 |
| C | 0.74384100  | 0.51711400  | -1.62823700 |
| H | 1.55934900  | 0.43215600  | -2.34325500 |
| C | -0.03618700 | -1.37390900 | -2.97420500 |
| C | -1.37126600 | -0.75664900 | -1.03550700 |
| C | -1.08234700 | -2.46027800 | -2.71139200 |
| H | 0.97520100  | -1.77085400 | -2.89753800 |
| H | -0.13872500 | -0.92242900 | -3.96628300 |
| C | -1.40685500 | -2.28219200 | -1.22516200 |
| H | -1.12535100 | -0.48541900 | -0.01168600 |
| H | -1.97637300 | -2.29201800 | -3.31977600 |
| H | -0.69774500 | -3.45516200 | -2.94468200 |
| H | -2.35415500 | -2.73579800 | -0.93500700 |
| H | -0.61659300 | -2.72441200 | -0.61289800 |
| N | -0.26249200 | -0.36014700 | -1.92047300 |
| C | -2.70162600 | -0.03658600 | -1.42429200 |
| H | -2.80041400 | -0.08642300 | -2.51183900 |
| C | -2.59870200 | 1.42725500  | -1.02957800 |
| C | -2.32354500 | 2.40627600  | -1.98469000 |
| C | -2.66415400 | 1.80266400  | 0.31591600  |
| C | -2.09085100 | 3.72739900  | -1.59680100 |
| H | -2.26688700 | 2.13471100  | -3.03278500 |

|   |             |             |             |
|---|-------------|-------------|-------------|
| C | -2.42007400 | 3.12052500  | 0.69605100  |
| H | -2.87842900 | 1.06588500  | 1.07959300  |
| C | -2.12477900 | 4.09670000  | -0.25475300 |
| H | -1.92686300 | 5.11836200  | 0.04297100  |
| C | -3.94179000 | -0.67338200 | -0.82417200 |
| C | -3.96216800 | -1.20552500 | 0.46851300  |
| C | -5.12018500 | -0.70045800 | -1.57693000 |
| C | -5.14044100 | -1.74252100 | 0.99280200  |
| H | -3.06117200 | -1.21845600 | 1.07158000  |
| C | -6.29067400 | -1.24011700 | -1.04740600 |
| H | -5.11941800 | -0.29959300 | -2.58470100 |
| C | -6.31325000 | -1.76421700 | 0.24469400  |
| H | -7.22137100 | -2.18771800 | 0.65323700  |
| O | 3.28938500  | -2.21738200 | -0.37487900 |
| C | 4.96288500  | -3.68617600 | -1.72647300 |
| F | 5.92772400  | -2.83432700 | -1.38968900 |
| F | 4.83160000  | -4.62304400 | -0.79519800 |
| F | 5.23991000  | -4.24494500 | -2.90053900 |
| C | -1.68470500 | 4.73075600  | -2.63626400 |
| C | -2.38579300 | 3.44881800  | 2.15948000  |
| C | -7.55576800 | -1.20653200 | -1.85554300 |
| C | -5.11704600 | -2.29627300 | 2.38862700  |
| F | -3.35592000 | 2.80617000  | 2.84805400  |
| F | -1.20626500 | 3.06226400  | 2.72658200  |
| F | -2.51736400 | 4.76720600  | 2.40191200  |
| F | -2.32388100 | 4.52871900  | -3.81075700 |
| F | -1.93896600 | 6.00024000  | -2.25148500 |
| F | -0.35676500 | 4.65997900  | -2.90084400 |
| F | -4.81693300 | -1.33537900 | 3.29827600  |
| F | -4.18002300 | -3.26406400 | 2.52817600  |
| F | -6.29949900 | -2.83145000 | 2.75596100  |
| F | -7.31207500 | -1.29060500 | -3.18264800 |
| F | -8.39174400 | -2.21856500 | -1.53434400 |
| F | -8.24513700 | -0.05578800 | -1.65987700 |



# TS<sub>E1</sub>

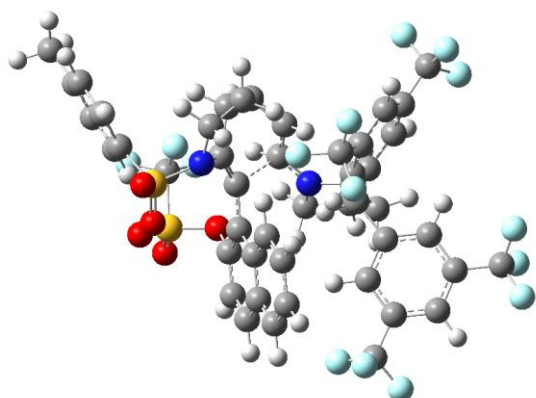

|   |             |             |             |
|---|-------------|-------------|-------------|
| N | -2.66140000 | 1.34151100  | 1.61938600  |
| S | -3.93228800 | 0.58696700  | 2.41527000  |
| O | -3.68820700 | -0.85922900 | 2.36653000  |
| O | -4.04915800 | 1.27122500  | 3.71386200  |
| C | -5.37436800 | 0.95277400  | 1.44269900  |
| C | -6.10508400 | 2.11854500  | 1.68198800  |
| C | -5.65989100 | 0.12989700  | 0.35207900  |
| C | -7.13477200 | 2.45508900  | 0.80610200  |
| H | -5.88151100 | 2.74086200  | 2.54040900  |
| C | -6.68566800 | 0.48752700  | -0.51537800 |
| H | -5.09237400 | -0.77634700 | 0.20123900  |
| C | -7.43672500 | 1.65326100  | -0.30389400 |
| H | -7.71305400 | 3.35612100  | 0.98626100  |
| H | -6.90518300 | -0.14881800 | -1.36742600 |
| C | -8.56297900 | 2.01635300  | -1.23354800 |
| H | -8.78767000 | 3.08508600  | -1.19015900 |
| H | -9.47705600 | 1.47488800  | -0.96160600 |
| H | -8.32475700 | 1.75069200  | -2.26740500 |
| C | -2.28871400 | 0.93486600  | 0.28038300  |
| C | -1.67124300 | -0.16710300 | -0.12143300 |
| C | -1.20759500 | -1.35037400 | 0.55153600  |
| C | -0.38171000 | -1.33770300 | 1.74235000  |
| C | -1.44261900 | -2.60537200 | 0.00098500  |
| C | -0.02432500 | -0.12928200 | 2.38955700  |
| C | 0.11342400  | -2.56792700 | 2.28850800  |
| C | -0.96785000 | -3.81957600 | 0.52138300  |
| C | 0.79317400  | -0.12550000 | 3.49995600  |
| H | -0.40313100 | 0.80198300  | 1.99863900  |
| C | 0.95031500  | -2.53220700 | 3.43510900  |

|   |             |             |             |
|---|-------------|-------------|-------------|
| C | -0.19920000 | -3.80193700 | 1.65937700  |
| H | -1.20381600 | -4.74593300 | 0.00916300  |
| C | 1.29297100  | -1.33781400 | 4.02533700  |
| H | 1.06383000  | 0.81911500  | 3.96089400  |
| H | 1.33671600  | -3.46962700 | 3.82006000  |
| H | 0.19105200  | -4.72351600 | 2.07653300  |
| H | 1.94596000  | -1.32457200 | 4.89199900  |
| S | -3.67726800 | -3.20416000 | -1.26035600 |
| O | -3.72611300 | -4.52778500 | -1.87004100 |
| O | -4.35409700 | -2.93497200 | 0.00131000  |
| C | -2.59307900 | 2.83608500  | 1.73044900  |
| H | -2.00519900 | 3.10445100  | 2.60762900  |
| H | -3.59475100 | 3.26462400  | 1.83172700  |
| C | -1.96260900 | 3.28109000  | 0.40292300  |
| H | -2.24625500 | 4.30651100  | 0.15666800  |
| H | -0.87192000 | 3.21563200  | 0.44498800  |
| C | -2.54343100 | 2.24898300  | -0.57061500 |
| H | -3.62990100 | 2.40883800  | -0.59659100 |
| C | -2.04118500 | 1.93497300  | -1.92597900 |
| H | -2.80550600 | 1.49816400  | -2.56913400 |
| C | -0.82053400 | 1.32986700  | -1.94264200 |
| H | -0.03565400 | 1.70266100  | -1.29402500 |
| C | -0.81990700 | -0.07372300 | -2.25323500 |
| H | -1.71712900 | -0.46825600 | -2.71174700 |
| C | 0.20051200  | -2.14962600 | -3.10917500 |
| C | 1.65978100  | -0.35018400 | -2.33730900 |
| C | 1.45667300  | -2.13006100 | -3.97611600 |
| H | 0.23947700  | -2.97348200 | -2.38805100 |
| H | -0.73393500 | -2.22835100 | -3.66744000 |
| C | 2.46748300  | -1.45747400 | -3.04255400 |
| H | 1.70172400  | 0.56267500  | -2.93833000 |
| H | 1.28466200  | -1.52326000 | -4.87133100 |
| H | 1.76879300  | -3.12959900 | -4.28702500 |
| H | 3.34226700  | -1.04921500 | -3.55283300 |
| H | 2.82117400  | -2.18911600 | -2.31199200 |
| N | 0.26765800  | -0.84891600 | -2.42042500 |
| C | 2.09559800  | -0.00695100 | -0.87050300 |
| H | 1.27116400  | -0.32869200 | -0.23256700 |
| C | 3.32165700  | -0.76376000 | -0.38379600 |
| C | 4.61182500  | -0.38787400 | -0.76788000 |
| C | 3.16267900  | -1.85846400 | 0.46801500  |
| C | 5.71777800  | -1.10348200 | -0.31257900 |
| H | 4.75698000  | 0.46966500  | -1.41551800 |
| C | 4.27590300  | -2.56545300 | 0.92578500  |

|   |             |             |             |
|---|-------------|-------------|-------------|
| H | 2.16779500  | -2.15887800 | 0.77244900  |
| C | 5.56203700  | -2.19629600 | 0.53957700  |
| H | 6.42476400  | -2.74428300 | 0.89623500  |
| C | 2.28472400  | 1.47990000  | -0.60346500 |
| C | 2.02050000  | 1.93746300  | 0.68787600  |
| C | 2.72304300  | 2.40264000  | -1.55643400 |
| C | 2.12291600  | 3.28767100  | 1.00930300  |
| H | 1.71759600  | 1.22628700  | 1.44401400  |
| C | 2.84426500  | 3.75434600  | -1.22313100 |
| H | 2.96623600  | 2.08770600  | -2.56415900 |
| C | 2.53159200  | 4.21553800  | 0.05457100  |
| H | 2.60952900  | 5.26681500  | 0.29934500  |
| O | -2.14406100 | -2.67355700 | -1.23616700 |
| C | -4.29500200 | -2.00006500 | -2.55227000 |
| F | -3.61353300 | -2.18453600 | -3.68079000 |
| F | -4.13851600 | -0.74816400 | -2.13375100 |
| F | -5.58766400 | -2.24559200 | -2.75270600 |
| C | 7.08747600  | -0.72200400 | -0.79530200 |
| C | 4.08639300  | -3.69800000 | 1.89411600  |
| C | 3.24561300  | 4.73298300  | -2.28899500 |
| C | 1.75282000  | 3.70223100  | 2.40314700  |
| F | 4.01623300  | -3.25865600 | 3.17504500  |
| F | 5.10331200  | -4.58661800 | 1.84463400  |
| F | 2.94418700  | -4.38325500 | 1.65601800  |
| F | 7.36498100  | -1.27854500 | -2.00042500 |
| F | 8.05959500  | -1.12293100 | 0.05209000  |
| F | 7.21383300  | 0.61538200  | -0.95107100 |
| F | 0.47617500  | 3.33657400  | 2.70279500  |
| F | 2.53688200  | 3.10362900  | 3.33141900  |
| F | 1.84102600  | 5.03191100  | 2.59560900  |
| F | 4.14722400  | 4.20310300  | -3.14710700 |
| F | 3.79105300  | 5.85573700  | -1.77353300 |
| F | 2.18357400  | 5.12167500  | -3.03683400 |

# TS<sub>E1'</sub>

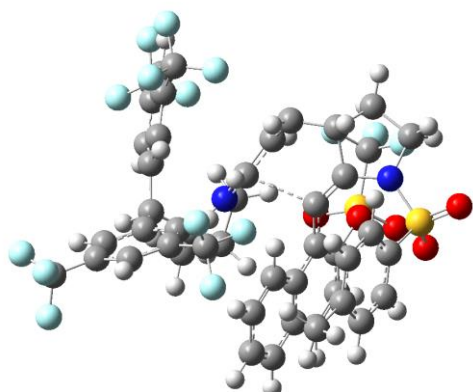

|   |             |             |             |
|---|-------------|-------------|-------------|
| N | 3.60863600  | -1.00922700 | 2.04104700  |
| S | 4.26666200  | -2.45194900 | 1.54595900  |
| O | 4.97394300  | -2.35037600 | 0.25576800  |
| O | 5.07289700  | -2.91545800 | 2.69542700  |
| C | 2.84050400  | -3.48560000 | 1.31226400  |
| C | 1.84358100  | -3.53125300 | 2.29032600  |
| C | 2.77026200  | -4.27624200 | 0.16709000  |
| C | 0.75583900  | -4.37455200 | 2.09989800  |
| H | 1.90575700  | -2.90212000 | 3.17128700  |
| C | 1.68235900  | -5.12991900 | 0.00482800  |
| H | 3.53784600  | -4.20152000 | -0.59314400 |
| C | 0.66017800  | -5.18691700 | 0.95841700  |
| H | -0.04225600 | -4.39165000 | 2.83555000  |
| H | 1.60771700  | -5.73005900 | -0.89610500 |
| C | -0.53252500 | -6.08167300 | 0.76130800  |
| H | -0.45217200 | -6.97990100 | 1.38525100  |
| H | -0.61780200 | -6.40378000 | -0.27925300 |
| H | -1.45688300 | -5.57162600 | 1.04361400  |
| C | 2.40553400  | -0.41026100 | 1.57899200  |
| C | 1.75754200  | -0.49195800 | 0.43232200  |
| C | 2.03224100  | -1.05168300 | -0.85064500 |
| C | 1.10957400  | -1.97144700 | -1.47880600 |
| C | 3.14157600  | -0.69380600 | -1.61378600 |
| C | -0.05606900 | -2.40445500 | -0.80396600 |
| C | 1.36492400  | -2.47214700 | -2.79496300 |
| C | 3.42551800  | -1.20057400 | -2.89019900 |
| C | -0.93941700 | -3.27891800 | -1.40029500 |
| H | -0.22521300 | -2.05066100 | 0.20487700  |
| C | 0.44161700  | -3.37825200 | -3.38053300 |
| C | 2.53939400  | -2.07155000 | -3.48209200 |

|   |             |             |             |
|---|-------------|-------------|-------------|
| H | 4.34571400  | -0.92787900 | -3.39439800 |
| C | -0.68845200 | -3.77237000 | -2.70067200 |
| H | -1.82239500 | -3.61163000 | -0.86982700 |
| H | 0.64786200  | -3.75410000 | -4.37845000 |
| H | 2.74214000  | -2.47022100 | -4.47027700 |
| H | -1.38769700 | -4.46538900 | -3.15778800 |
| S | 4.81204500  | 1.33929200  | -1.83481600 |
| O | 6.12182000  | 0.88573800  | -2.28657000 |
| O | 3.89784700  | 1.99942900  | -2.76166900 |
| C | 4.33676200  | -0.14926400 | 3.01813700  |
| H | 5.34249100  | 0.07383600  | 2.65644900  |
| H | 4.41081700  | -0.66076800 | 3.98073000  |
| C | 3.44678200  | 1.10265900  | 3.09992800  |
| H | 3.51563100  | 1.57319600  | 4.08272300  |
| H | 3.73354100  | 1.83034400  | 2.33848600  |
| C | 2.04930500  | 0.53567100  | 2.81310200  |
| H | 1.79649800  | -0.11652100 | 3.65989000  |
| C | 0.84871500  | 1.29241600  | 2.40047400  |
| H | -0.08126100 | 0.83262000  | 2.73291800  |
| C | 0.85889900  | 1.73341200  | 1.10504000  |
| H | 1.73658600  | 2.21157400  | 0.68432300  |
| C | -0.03683400 | 1.06723600  | 0.21469400  |
| H | -0.80916800 | 0.47456400  | 0.68540500  |
| C | 0.73379200  | 2.05109400  | -1.91244100 |
| C | -1.32135200 | 0.71750500  | -1.87051700 |
| C | 0.51559600  | 1.45124400  | -3.30045900 |
| H | 0.50675600  | 3.12444800  | -1.88157800 |
| H | 1.74402900  | 1.90602300  | -1.53563600 |
| C | -0.98941700 | 1.15464900  | -3.31156900 |
| H | -1.26463400 | -0.36968400 | -1.78841800 |
| H | 1.09270700  | 0.52749300  | -3.39390100 |
| H | 0.82011500  | 2.13009900  | -4.09957500 |
| H | -1.27415100 | 0.38273900  | -4.02954500 |
| H | -1.54738500 | 2.06294400  | -3.56161400 |
| N | -0.21896600 | 1.30615000  | -1.08455700 |
| C | -2.77031100 | 1.16892500  | -1.40662000 |
| H | -3.25977400 | 1.56762800  | -2.29929700 |
| C | -3.63119800 | 0.01547500  | -0.92721300 |
| C | -4.94478000 | -0.09672600 | -1.38577100 |
| C | -3.16738300 | -0.93535400 | -0.00953800 |
| C | -5.77319900 | -1.12844400 | -0.93714400 |
| H | -5.32727600 | 0.62948700  | -2.09483700 |
| C | -3.99560800 | -1.96171800 | 0.43462900  |
| H | -2.15674100 | -0.88624400 | 0.36775600  |

|   |             |             |             |
|---|-------------|-------------|-------------|
| C | -5.30830400 | -2.07038800 | -0.02447200 |
| H | -5.95229300 | -2.86988200 | 0.32235900  |
| C | -2.68433000 | 2.31712500  | -0.41011700 |
| C | -2.96748700 | 2.17399500  | 0.94784300  |
| C | -2.17498700 | 3.54090100  | -0.85658500 |
| C | -2.70134900 | 3.21419800  | 1.84176100  |
| H | -3.37765500 | 1.24608100  | 1.32671000  |
| C | -1.89638300 | 4.56723000  | 0.04170900  |
| H | -1.96161400 | 3.68327100  | -1.91023100 |
| C | -2.14746500 | 4.41293200  | 1.40445400  |
| H | -1.92252500 | 5.20807800  | 2.10298600  |
| O | 4.07179300  | 0.18064800  | -0.98422300 |
| C | 5.08754900  | 2.46772700  | -0.37305900 |
| F | 5.67996300  | 1.79776400  | 0.60875700  |
| F | 3.91957900  | 2.95366500  | 0.04285800  |
| F | 5.86757900  | 3.46385400  | -0.78004600 |
| C | -1.24332600 | 5.81255700  | -0.48170000 |
| C | -2.94016500 | 2.97925100  | 3.30448400  |
| C | -7.16137500 | -1.25381300 | -1.49705400 |
| C | -3.48770400 | -2.98551500 | 1.40937000  |
| F | -1.85173600 | 6.26948300  | -1.60056700 |
| F | 0.05307400  | 5.58330600  | -0.81998800 |
| F | -1.24275000 | 6.81713200  | 0.41743300  |
| F | -1.95957200 | 2.21654600  | 3.85395100  |
| F | -2.98475100 | 4.12685300  | 4.01211400  |
| F | -4.10150600 | 2.32102200  | 3.52548000  |
| F | -7.99363700 | -1.90317400 | -0.65443700 |
| F | -7.71188300 | -0.04685000 | -1.75779400 |
| F | -7.16942800 | -1.94335700 | -2.66386500 |
| F | -2.20368300 | -2.77056800 | 1.77534900  |
| F | -4.22651800 | -3.02258000 | 2.53910200  |
| F | -3.53833600 | -4.23698500 | 0.87763600  |

# E

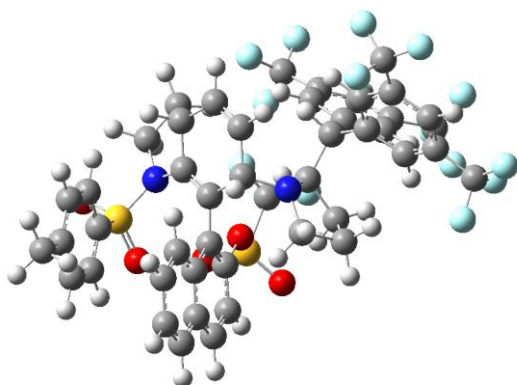

|   |            |             |             |
|---|------------|-------------|-------------|
| N | 3.22113800 | -1.38863300 | 1.26236400  |
| S | 4.75827600 | -1.51400100 | 0.57659000  |
| O | 4.68228500 | -1.76104100 | -0.86945500 |
| O | 5.44791300 | -2.53549000 | 1.38910100  |
| C | 5.54126800 | 0.06449300  | 0.81311400  |
| C | 5.47884000 | 0.70710100  | 2.04886800  |
| C | 6.31680200 | 0.57055700  | -0.23187100 |
| C | 6.18876800 | 1.89208400  | 2.22484300  |
| H | 4.89463000 | 0.29473400  | 2.86330400  |
| C | 7.03455200 | 1.74234600  | -0.02863800 |
| H | 6.34089700 | 0.06126500  | -1.18680200 |
| C | 6.97465700 | 2.42478800  | 1.19438100  |
| H | 6.13549000 | 2.40858900  | 3.17804300  |
| H | 7.63139300 | 2.14769200  | -0.83925200 |
| C | 7.70764200 | 3.72548800  | 1.37196700  |
| H | 7.74942300 | 4.02292000  | 2.42239300  |
| H | 8.72960900 | 3.66037500  | 0.98651500  |
| H | 7.20327300 | 4.52425400  | 0.81484300  |
| C | 2.39987400 | -0.22326000 | 1.35429700  |
| C | 2.04711900 | 0.66057700  | 0.40614900  |
| C | 2.63723800 | 0.66525900  | -0.95735700 |
| C | 3.47618800 | 1.75391200  | -1.36835500 |
| C | 2.36406900 | -0.31626400 | -1.88512900 |
| C | 3.83439700 | 2.80258000  | -0.48044200 |
| C | 3.98404300 | 1.79229900  | -2.70567600 |
| C | 2.83948800 | -0.29229500 | -3.21034700 |
| C | 4.62702000 | 3.84512400  | -0.90232200 |
| H | 3.51546000 | 2.75554400  | 0.55298000  |
| C | 4.81314900 | 2.87308300  | -3.10552000 |
| C | 3.64254300 | 0.74988000  | -3.60427600 |

|   |             |             |             |
|---|-------------|-------------|-------------|
| H | 2.57238200  | -1.07057300 | -3.91305200 |
| C | 5.12112200  | 3.88616300  | -2.22696300 |
| H | 4.89331100  | 4.63355500  | -0.20588300 |
| H | 5.19428500  | 2.88428200  | -4.12228000 |
| H | 4.01969800  | 0.78546000  | -4.62111100 |
| H | 5.75091200  | 4.71162900  | -2.54263500 |
| S | 1.39012500  | -2.80488800 | -2.12402900 |
| O | 2.58930600  | -3.60938200 | -1.94121400 |
| O | 0.76128900  | -2.70406600 | -3.43779500 |
| C | 2.89269000  | -2.34445000 | 2.37206500  |
| H | 2.69833300  | -3.33542000 | 1.96004600  |
| H | 3.72826200  | -2.41079000 | 3.07016100  |
| C | 1.66100000  | -1.71402200 | 3.03165200  |
| H | 1.60405600  | -1.96471300 | 4.09249100  |
| H | 0.74620000  | -2.04912600 | 2.54247900  |
| C | 1.88744900  | -0.21726700 | 2.77133900  |
| H | 2.73773400  | 0.08111300  | 3.40741900  |
| C | 0.78242800  | 0.75194200  | 3.01452000  |
| H | 0.32428900  | 0.74973600  | 4.00048400  |
| C | 0.42882400  | 1.65789400  | 2.10264200  |
| H | -0.33881600 | 2.39290000  | 2.32720100  |
| C | 0.97061800  | 1.73230700  | 0.69678900  |
| H | 1.41875100  | 2.72456300  | 0.56443000  |
| C | 0.01646700  | 2.38276100  | -1.54083000 |
| C | -0.94579200 | 0.48460100  | -0.37499100 |
| C | -1.11739700 | 1.83182800  | -2.40368900 |
| H | 0.98010000  | 2.14546700  | -2.00308700 |
| H | -0.02904500 | 3.47227100  | -1.42568300 |
| C | -1.27698300 | 0.39633800  | -1.87793300 |
| H | -0.34303600 | -0.37967300 | -0.07818400 |
| H | -2.02955400 | 2.41535500  | -2.26198500 |
| H | -0.86763600 | 1.85929200  | -3.46732800 |
| H | -2.25753400 | -0.04098200 | -2.07764500 |
| H | -0.54118200 | -0.24771700 | -2.36343700 |
| N | -0.16562300 | 1.72209200  | -0.23815200 |
| C | -2.17152500 | 0.46037600  | 0.61406100  |
| H | -1.71002700 | 0.58445200  | 1.59364400  |
| C | -2.79115500 | -0.92633900 | 0.64257500  |
| C | -3.84789600 | -1.34072200 | -0.16926800 |
| C | -2.20329400 | -1.87156200 | 1.49356100  |
| C | -4.28670500 | -2.66734300 | -0.14350200 |
| H | -4.34654600 | -0.64433700 | -0.82914900 |
| C | -2.63471800 | -3.19423200 | 1.50536600  |
| H | -1.39232900 | -1.56398700 | 2.14235600  |



|   |             |             |             |
|---|-------------|-------------|-------------|
| C | -3.68258000 | -3.60873800 | 0.68279700  |
| H | -4.01778600 | -4.63874200 | 0.68720100  |
| C | -3.14377500 | 1.61330400  | 0.47706700  |
| C | -3.90229900 | 1.86899400  | -0.66955400 |
| C | -3.28029000 | 2.49679400  | 1.55487400  |
| C | -4.74650200 | 2.97777200  | -0.73886700 |
| H | -3.83444000 | 1.22345500  | -1.53402400 |
| C | -4.13302100 | 3.59800300  | 1.48519300  |
| H | -2.71229400 | 2.31999300  | 2.46180500  |
| C | -4.87261000 | 3.85572100  | 0.33270400  |
| H | -5.53002700 | 4.71328400  | 0.27359300  |
| O | 1.50700100  | -1.34771600 | -1.43051700 |
| C | 0.09200100  | -3.40406300 | -0.91608700 |
| F | 0.45961600  | -3.10710300 | 0.32668600  |
| F | -1.07036500 | -2.83236800 | -1.20731400 |
| F | -0.00022600 | -4.72095700 | -1.06059100 |
| C | -4.19722900 | 4.54728600  | 2.64585500  |
| C | -5.46419500 | 3.23168200  | -2.03093100 |
| C | -5.46499100 | -3.05884800 | -0.98766100 |
| C | -1.92190400 | -4.22133900 | 2.33470100  |
| F | -4.11428200 | 3.90155000  | 3.83197300  |
| F | -3.17521600 | 5.43863600  | 2.62235300  |
| F | -5.34085800 | 5.26594900  | 2.65773700  |
| F | -4.60014100 | 3.61740900  | -3.00514100 |
| F | -6.39973200 | 4.19746600  | -1.92752300 |
| F | -6.08131500 | 2.11781200  | -2.49099900 |
| F | -5.47748200 | -4.38004200 | -1.26827900 |
| F | -5.48370700 | -2.39655500 | -2.16718000 |
| F | -6.63897900 | -2.77858100 | -0.36996800 |
| F | -1.14396300 | -5.02322800 | 1.56161700  |
| F | -2.78178900 | -5.03690100 | 2.98504900  |
| F | -1.11110900 | -3.66887400 | 3.26399000  |

**E'**

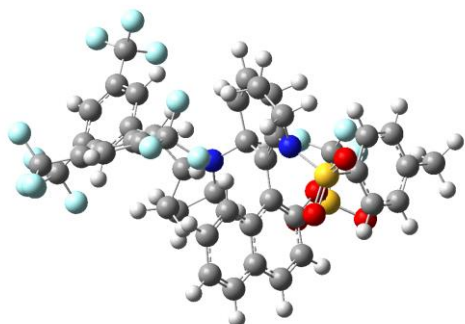

|   |            |             |             |
|---|------------|-------------|-------------|
| N | 2.54356500 | 2.42323100  | -1.32984200 |
| S | 3.99577700 | 2.84860700  | -0.57406900 |
| O | 3.77540900 | 3.21945600  | 0.83061100  |
| O | 4.58995900 | 3.88027600  | -1.44674300 |
| C | 4.99835400 | 1.38220800  | -0.61417300 |
| C | 5.14429600 | 0.67600800  | -1.81056500 |
| C | 5.70450500 | 1.02383800  | 0.53214400  |
| C | 5.98822200 | -0.42646400 | -1.83881400 |
| H | 4.61072700 | 0.98018000  | -2.70383700 |
| C | 6.55702100 | -0.07595500 | 0.47838500  |
| H | 5.57206400 | 1.58203500  | 1.45053500  |
| C | 6.70182600 | -0.82289400 | -0.69663100 |
| H | 6.09422800 | -0.99318400 | -2.75864400 |
| H | 7.10156700 | -0.37066000 | 1.36895400  |
| C | 7.57033700 | -2.05058900 | -0.73553000 |
| H | 8.21954800 | -2.04756400 | -1.61665400 |
| H | 8.19430100 | -2.12662100 | 0.15739900  |
| H | 6.95359400 | -2.95455400 | -0.79130600 |
| C | 1.95362000 | 1.12316900  | -1.37916900 |
| C | 1.69302500 | 0.25921400  | -0.38114300 |
| C | 2.11300700 | 0.48930800  | 1.02927000  |
| C | 1.56389500 | 1.54077300  | 1.83541300  |
| C | 3.02994700 | -0.34952900 | 1.63020600  |
| C | 0.68081800 | 2.51927000  | 1.30818100  |
| C | 1.91541200 | 1.62612800  | 3.22137600  |
| C | 3.45148600 | -0.23475500 | 2.96754000  |
| C | 0.12259100 | 3.48120400  | 2.11715300  |
| H | 0.46864600 | 2.52013300  | 0.24984000  |
| C | 1.31863700 | 2.62769200  | 4.03264300  |
| C | 2.87080200 | 0.72680300  | 3.75711900  |
| H | 4.22033000 | -0.88659400 | 3.36459300  |
| C | 0.42973600 | 3.52971900  | 3.49729400  |

|   |             |             |             |
|---|-------------|-------------|-------------|
| H | -0.54578700 | 4.21802600  | 1.68585400  |
| H | 1.58737600  | 2.66836700  | 5.08394400  |
| H | 3.15865400  | 0.82051400  | 4.79904600  |
| H | -0.02228600 | 4.29117900  | 4.12462900  |
| S | 4.03684800  | -2.78900900 | 1.36722500  |
| O | 3.01680400  | -3.32553300 | 2.26001900  |
| O | 5.43943200  | -2.79037300 | 1.76319900  |
| C | 2.14333600  | 3.22856700  | -2.53043500 |
| H | 1.71812900  | 4.18086700  | -2.21053500 |
| H | 3.01454700  | 3.42309200  | -3.15650400 |
| C | 1.12533500  | 2.33322300  | -3.24564900 |
| H | 1.16015600  | 2.48008500  | -4.32677400 |
| H | 0.10947600  | 2.54441400  | -2.90527800 |
| C | 1.55928600  | 0.92126400  | -2.82125600 |
| H | 2.48915600  | 0.69858200  | -3.37053500 |
| C | 0.61726200  | -0.21317900 | -3.03609900 |
| H | 0.18825000  | -0.32822600 | -4.02828700 |
| C | 0.37213500  | -1.10678900 | -2.07866600 |
| H | -0.27463900 | -1.95754700 | -2.27186900 |
| C | 0.90118100  | -1.03877300 | -0.66514000 |
| H | 1.56978900  | -1.89384500 | -0.52981200 |
| C | 0.04646500  | -2.03278400 | 1.49832100  |
| C | -1.14434900 | -0.18014900 | 0.51332900  |
| C | -1.19362900 | -1.76661300 | 2.34972500  |
| H | 0.93370700  | -1.67076400 | 2.02875500  |
| H | 0.20432300  | -3.09501200 | 1.28172900  |
| C | -1.50759600 | -0.30401300 | 2.00357300  |
| H | -0.64033300 | 0.77185100  | 0.35243700  |
| H | -2.01564100 | -2.42608000 | 2.05782600  |
| H | -0.99938200 | -1.91787400 | 3.41445700  |
| H | -2.53072300 | 0.00265500  | 2.22777500  |
| H | -0.84585400 | 0.35376600  | 2.57485800  |
| N | -0.21838600 | -1.28682000 | 0.25883300  |
| C | -2.34019500 | -0.14815700 | -0.50691100 |
| H | -1.84872700 | -0.18456500 | -1.48138700 |
| C | -2.99226700 | 1.22295500  | -0.44623200 |
| C | -4.26713300 | 1.50445600  | 0.04710900  |
| C | -2.21271800 | 2.29380500  | -0.89902700 |
| C | -4.72812500 | 2.82348600  | 0.10090700  |
| H | -4.91566100 | 0.70886000  | 0.39027300  |
| C | -2.67407800 | 3.60462100  | -0.84285300 |
| H | -1.22492600 | 2.09462100  | -1.29582800 |
| C | -3.94113400 | 3.88703900  | -0.33691200 |
| H | -4.30556800 | 4.90478500  | -0.28588600 |

|   |             |             |             |
|---|-------------|-------------|-------------|
| C | -3.25455300 | -1.34920700 | -0.45953900 |
| C | -4.07755700 | -1.65704300 | 0.62901900  |
| C | -3.24860000 | -2.23532200 | -1.54322600 |
| C | -4.85249900 | -2.81724400 | 0.63372500  |
| H | -4.11631300 | -1.00593200 | 1.49203900  |
| C | -4.02872600 | -3.39111500 | -1.53554100 |
| H | -2.62597400 | -2.01751200 | -2.40392700 |
| C | -4.83650500 | -3.69869100 | -0.44290800 |
| H | -5.43956500 | -4.59723800 | -0.43244800 |
| O | 3.61228300  | -1.33112300 | 0.78627800  |
| C | 3.90972200  | -3.68101600 | -0.28339300 |
| F | 2.65521900  | -4.08533600 | -0.45677200 |
| F | 4.27170900  | -2.88486200 | -1.28043500 |
| F | 4.72382300  | -4.72963100 | -0.22012000 |
| C | -3.93868200 | -4.33993200 | -2.69508400 |
| C | -5.65127500 | -3.12614300 | 1.86495700  |
| C | -6.12392400 | 3.08927000  | 0.58665700  |
| C | -1.77955300 | 4.68876000  | -1.36768200 |
| F | -3.81574700 | -3.68688000 | -3.87373900 |
| F | -2.85911700 | -5.15420200 | -2.59328200 |
| F | -5.02313500 | -5.13960900 | -2.78952300 |
| F | -4.84786100 | -3.51109400 | 2.88885200  |
| F | -6.54571300 | -4.11703900 | 1.67036000  |
| F | -6.33584500 | -2.04371400 | 2.30454200  |
| F | -6.25158800 | 4.32457500  | 1.11990200  |
| F | -6.50993900 | 2.20144100  | 1.53091200  |
| F | -7.03069300 | 3.00334100  | -0.41784400 |
| F | -0.54099900 | 4.63555300  | -0.80572300 |
| F | -2.26490600 | 5.92390600  | -1.14192600 |
| F | -1.58315300 | 4.57034300  | -2.70460000 |

# E1

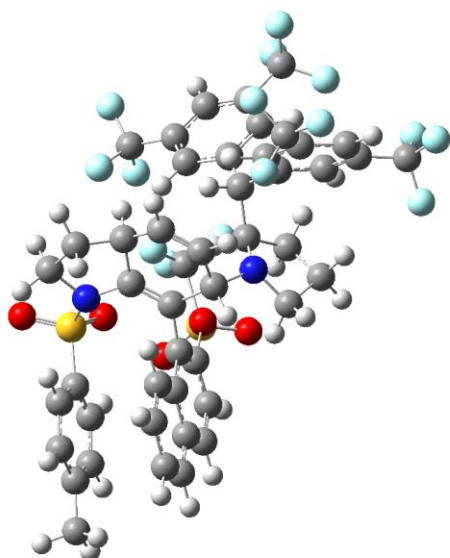

|   |             |             |             |
|---|-------------|-------------|-------------|
| N | -2.96171700 | 0.05689500  | 2.30154300  |
| S | -3.93429800 | 1.24109000  | 1.60821800  |
| O | -3.18243400 | 1.97859500  | 0.58845300  |
| O | -4.48548800 | 1.99189100  | 2.75113600  |
| C | -5.27264200 | 0.37971600  | 0.82344900  |
| C | -5.87100100 | -0.70472800 | 1.46970400  |
| C | -5.77482700 | 0.88291100  | -0.37386900 |
| C | -6.97974100 | -1.30159400 | 0.88583700  |
| H | -5.46185800 | -1.08864300 | 2.39705600  |
| C | -6.89116800 | 0.27061400  | -0.93992700 |
| H | -5.29007000 | 1.71745700  | -0.86478000 |
| C | -7.50452100 | -0.82671400 | -0.32697300 |
| H | -7.43739700 | -2.16087000 | 1.36578000  |
| H | -7.27829100 | 0.64236900  | -1.88322800 |
| C | -8.68751200 | -1.51044400 | -0.95655600 |
| H | -9.56164400 | -1.47139800 | -0.29736000 |
| H | -8.95752000 | -1.04687100 | -1.90831500 |
| H | -8.46813500 | -2.56768100 | -1.13941000 |
| C | -1.84504200 | -0.60832800 | 1.70983600  |
| C | -1.68120500 | -1.08025400 | 0.46090900  |
| C | -2.70480900 | -1.00648400 | -0.61979900 |
| C | -3.67679600 | -2.06211500 | -0.70071700 |
| C | -2.67627500 | -0.09156200 | -1.65208800 |
| C | -3.78002700 | -3.05939900 | 0.30605000  |
| C | -4.57264600 | -2.12702000 | -1.81451700 |
| C | -3.53017500 | -0.15712300 | -2.77253000 |
| C | -4.72271500 | -4.05926800 | 0.21511000  |
| H | -3.10835300 | -3.02034800 | 1.15560500  |

|   |             |             |             |
|---|-------------|-------------|-------------|
| C | -5.53712000 | -3.16572000 | -1.87544800 |
| C | -4.46862900 | -1.15594100 | -2.84029800 |
| H | -3.44132800 | 0.55782200  | -3.58090900 |
| C | -5.61290800 | -4.11502300 | -0.88233800 |
| H | -4.78702100 | -4.81016000 | 0.99626200  |
| H | -6.21488700 | -3.19286300 | -2.72329400 |
| H | -5.13584600 | -1.21395100 | -3.69380400 |
| H | -6.35321100 | -4.90660400 | -0.93760100 |
| S | -1.80771200 | 2.32797200  | -2.33138900 |
| O | -3.14718600 | 2.87954400  | -2.18505600 |
| O | -1.17587300 | 2.27004300  | -3.64637600 |
| C | -2.86069900 | 0.07003500  | 3.79356400  |
| H | -2.51239500 | 1.04460800  | 4.14436800  |
| H | -3.83540400 | -0.13553600 | 4.23523800  |
| C | -1.82978900 | -1.01609400 | 4.06010200  |
| H | -2.30206600 | -2.00353100 | 4.05766200  |
| H | -1.31864300 | -0.87120800 | 5.01347500  |
| C | -0.88836000 | -0.89613500 | 2.85050800  |
| H | -0.25855000 | -0.00310300 | 3.00087900  |
| C | -0.02334600 | -2.08997800 | 2.60962500  |
| H | 0.49786600  | -2.50675400 | 3.46832000  |
| C | 0.11992800  | -2.61558200 | 1.39537400  |
| H | 0.76813700  | -3.47315500 | 1.23866000  |
| C | -0.53002700 | -2.06126500 | 0.15202200  |
| H | -1.01380700 | -2.91123400 | -0.34623700 |
| C | 0.25703700  | -1.91931000 | -2.21906200 |
| C | 1.11453100  | -0.30883200 | -0.65319700 |
| C | 1.41473200  | -1.21429900 | -2.91555200 |
| H | -0.70181400 | -1.51859300 | -2.57827800 |
| H | 0.24487600  | -3.00138300 | -2.38917000 |
| C | 1.54669700  | 0.07544900  | -2.09116200 |
| H | 0.37629400  | 0.41728000  | -0.29491500 |
| H | 2.32079500  | -1.82366100 | -2.85567200 |
| H | 1.20796100  | -1.01510400 | -3.97005600 |
| H | 2.53988200  | 0.52634000  | -2.13675600 |
| H | 0.85308900  | 0.81647100  | -2.48593900 |
| N | 0.50598200  | -1.63546200 | -0.79978100 |
| C | 2.24597500  | -0.28667100 | 0.43753100  |
| H | 1.73146100  | -0.52451500 | 1.37035400  |
| C | 2.76273600  | 1.13183800  | 0.60191000  |
| C | 4.01140000  | 1.57033800  | 0.16258000  |
| C | 1.90317100  | 2.06684400  | 1.19624600  |
| C | 4.38136300  | 2.91236700  | 0.29464000  |
| H | 4.71349700  | 0.87623800  | -0.28128900 |

|   |             |             |             |
|---|-------------|-------------|-------------|
| C | 2.27174700  | 3.40306300  | 1.31223100  |
| H | 0.93665200  | 1.74092100  | 1.56285600  |
| C | 3.51742300  | 3.84241800  | 0.86056700  |
| H | 3.80452100  | 4.88249500  | 0.95354900  |
| C | 3.29453400  | -1.36057500 | 0.25843200  |
| C | 4.09021100  | -1.48131000 | -0.88548800 |
| C | 3.43855400  | -2.32879800 | 1.25551500  |
| C | 4.96465800  | -2.55751700 | -1.03800000 |
| H | 4.03020500  | -0.74840400 | -1.67807700 |
| C | 4.30783700  | -3.40745700 | 1.09485500  |
| H | 2.84168300  | -2.25584800 | 2.15705300  |
| C | 5.07742100  | -3.53999800 | -0.05751800 |
| H | 5.74345000  | -4.38251100 | -0.18753300 |
| O | -1.64744000 | 0.88134900  | -1.60558600 |
| C | -0.63121100 | 3.28649000  | -1.20957700 |
| F | -0.77999700 | 2.93542700  | 0.05517300  |
| F | 0.61937500  | 3.06461500  | -1.60126300 |
| F | -0.93599600 | 4.56984800  | -1.37090700 |
| C | 4.34306600  | -4.44739000 | 2.17444400  |
| C | 5.72514100  | -2.66468200 | -2.32609500 |
| C | 5.75761800  | 3.32733000  | -0.13820700 |
| C | 1.30866700  | 4.41228600  | 1.86541500  |
| F | 4.65196300  | -3.91313700 | 3.38007100  |
| F | 3.13020800  | -5.04104600 | 2.32334200  |
| F | 5.23684000  | -5.42692500 | 1.92895800  |
| F | 4.89915000  | -2.95687900 | -3.36424500 |
| F | 6.67311200  | -3.62362600 | -2.29490900 |
| F | 6.33789600  | -1.50033700 | -2.64583000 |
| F | 5.84980700  | 4.65704300  | -0.35475300 |
| F | 6.13438000  | 2.70625300  | -1.27998900 |
| F | 6.69170600  | 3.01550600  | 0.79403100  |
| F | 0.74340600  | 5.15155300  | 0.87381600  |
| F | 1.91637200  | 5.29128100  | 2.69384300  |
| F | 0.29733700  | 3.84164500  | 2.55245400  |

# E1'

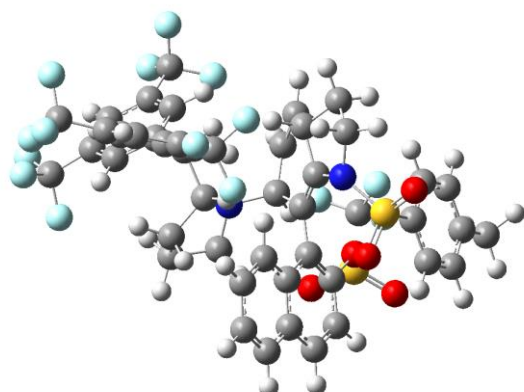

|   |            |             |             |
|---|------------|-------------|-------------|
| N | 2.14175800 | 2.41561800  | -1.49173100 |
| S | 3.66146200 | 2.94674300  | -0.94274900 |
| O | 3.56306600 | 3.42366900  | 0.44169600  |
| O | 4.11806400 | 3.91747400  | -1.95453900 |
| C | 4.73292500 | 1.52737900  | -0.97434200 |
| C | 4.72960500 | 0.67833100  | -2.08261900 |
| C | 5.63921500 | 1.35516100  | 0.07042800  |
| C | 5.63649000 | -0.37156000 | -2.12457200 |
| H | 4.02825000 | 0.82549500  | -2.89471900 |
| C | 6.54045600 | 0.29472800  | 0.00875200  |
| H | 5.61999000 | 2.01961400  | 0.92537100  |
| C | 6.54551300 | -0.58787800 | -1.07750100 |
| H | 5.62808100 | -1.04845500 | -2.97308800 |
| H | 7.23484300 | 0.13795600  | 0.82767900  |
| C | 7.46826200 | -1.77491800 | -1.11782800 |
| H | 8.06467200 | -1.77953800 | -2.03622600 |
| H | 8.14758800 | -1.78348500 | -0.26303600 |
| H | 6.89122800 | -2.70612700 | -1.10236000 |
| C | 1.53903000 | 1.15570400  | -1.19947500 |
| C | 1.60839600 | 0.36776200  | -0.10834800 |
| C | 2.25745600 | 0.70445400  | 1.18463700  |
| C | 1.76579300 | 1.74755000  | 2.04195900  |
| C | 3.29600600 | -0.06577800 | 1.66703900  |
| C | 0.74619300 | 2.64919700  | 1.63880000  |
| C | 2.32064400 | 1.90230400  | 3.35381100  |
| C | 3.90039100 | 0.11123200  | 2.92429100  |
| C | 0.26366900 | 3.60971400  | 2.49799400  |
| H | 0.36087300 | 2.59615100  | 0.63137000  |
| C | 1.80104700 | 2.90179300  | 4.21877300  |
| C | 3.39296100 | 1.07013800  | 3.76556400  |



|   |             |             |             |
|---|-------------|-------------|-------------|
| H | 4.75267400  | -0.49180700 | 3.21478300  |
| C | 0.78625600  | 3.73292700  | 3.80662100  |
| H | -0.51600300 | 4.28366900  | 2.16074400  |
| H | 2.22871500  | 2.99747800  | 5.21227300  |
| H | 3.82519700  | 1.21493600  | 4.75018200  |
| H | 0.39467900  | 4.49261400  | 4.47534200  |
| S | 4.18829100  | -2.52283100 | 1.30956200  |
| O | 3.22332100  | -2.96968000 | 2.30827000  |
| O | 5.62143300  | -2.61936700 | 1.55662700  |
| C | 1.67727200  | 2.89049000  | -2.83492300 |
| H | 0.79912700  | 3.52624300  | -2.68369700 |
| H | 2.45380300  | 3.47522200  | -3.31781100 |
| C | 1.31155400  | 1.60142700  | -3.55978900 |
| H | 2.20562800  | 1.11611000  | -3.96321500 |
| H | 0.60586900  | 1.77049700  | -4.37545500 |
| C | 0.70734500  | 0.77967000  | -2.41890500 |
| H | -0.30316900 | 1.18778200  | -2.25772500 |
| C | 0.57122800  | -0.70199500 | -2.58868300 |
| H | 0.33664400  | -1.07900900 | -3.58105600 |
| C | 0.65366400  | -1.51062900 | -1.53349400 |
| H | 0.48993300  | -2.58029700 | -1.63234400 |
| C | 0.92242100  | -1.01095900 | -0.13428900 |
| H | 1.61488700  | -1.71839500 | 0.31816500  |
| C | -0.04940900 | -1.55522000 | 2.10009200  |
| C | -1.23062100 | -0.00800400 | 0.69996300  |
| C | -1.37536900 | -1.25600100 | 2.79026100  |
| H | 0.75806200  | -0.98491000 | 2.58048100  |
| H | 0.23081400  | -2.61305600 | 2.13163300  |
| C | -1.77274600 | 0.07817500  | 2.14349100  |
| H | -0.70013400 | 0.91597800  | 0.47296400  |
| H | -2.10987500 | -2.03571500 | 2.56799400  |
| H | -1.27080200 | -1.18608400 | 3.87590000  |
| H | -2.84237700 | 0.29117700  | 2.18884800  |
| H | -1.26261200 | 0.89946100  | 2.65535200  |
| N | -0.28801800 | -1.13304500 | 0.70732800  |
| C | -2.30757500 | -0.12501000 | -0.43329900 |
| H | -1.73183800 | -0.15101100 | -1.36051000 |
| C | -3.11015300 | 1.16486700  | -0.48220700 |
| C | -4.48824400 | 1.26054300  | -0.27998700 |
| C | -2.40424100 | 2.34819100  | -0.73482400 |
| C | -5.12597500 | 2.50468000  | -0.30719500 |
| H | -5.08067200 | 0.37182800  | -0.10418600 |
| C | -3.04277900 | 3.58363800  | -0.75911800 |
| H | -1.33742700 | 2.31105300  | -0.91755500 |

|   |             |             |             |
|---|-------------|-------------|-------------|
| C | -4.41481400 | 3.67993800  | -0.53981200 |
| H | -4.91448800 | 4.63966200  | -0.55237500 |
| C | -3.06809500 | -1.42847400 | -0.38800500 |
| C | -3.96107400 | -1.77382400 | 0.63162800  |
| C | -2.77884000 | -2.39304000 | -1.35754900 |
| C | -4.52292300 | -3.05003100 | 0.68420400  |
| H | -4.21216100 | -1.06304600 | 1.40810200  |
| C | -3.34103000 | -3.66730800 | -1.29898400 |
| H | -2.08034500 | -2.15248300 | -2.15050000 |
| C | -4.21855200 | -4.01299000 | -0.27460900 |
| H | -4.64655500 | -5.00516100 | -0.21990100 |
| O | 3.82138600  | -1.03474800 | 0.77281500  |
| C | 3.82719500  | -3.43505800 | -0.30652100 |
| F | 2.59855700  | -3.93809600 | -0.24027600 |
| F | 3.92737800  | -2.62373200 | -1.34859500 |
| F | 4.71736600  | -4.41703100 | -0.40448200 |
| C | -2.97533000 | -4.65444100 | -2.36764000 |
| C | -5.39427300 | -3.38613000 | 1.85745600  |
| C | -6.61708000 | 2.55687200  | -0.13680300 |
| C | -2.19944200 | 4.79514800  | -1.02638600 |
| F | -3.53296600 | -4.33534900 | -3.56124600 |
| F | -1.63484300 | -4.68922000 | -2.57213400 |
| F | -3.36784400 | -5.91080200 | -2.07155000 |
| F | -4.66110600 | -3.51182900 | 2.99368200  |
| F | -6.06841100 | -4.54312100 | 1.69329000  |
| F | -6.30772000 | -2.41679300 | 2.10003400  |
| F | -7.04289500 | 3.76855200  | 0.28155500  |
| F | -7.05450600 | 1.64398200  | 0.76064100  |
| F | -7.26438900 | 2.29444800  | -1.29902500 |
| F | -1.22272300 | 4.94039400  | -0.09364200 |
| F | -2.91173300 | 5.93720500  | -1.04124900 |
| F | -1.55950100 | 4.70246700  | -2.22110500 |

20

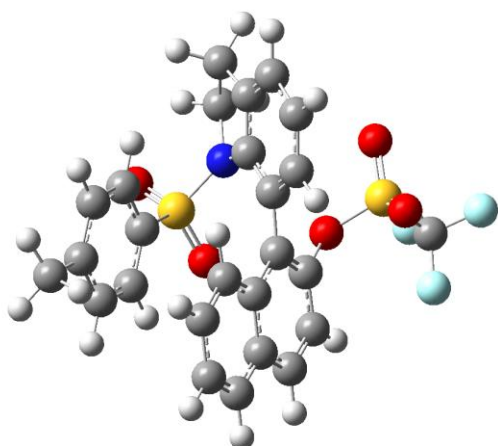

|   |             |             |             |
|---|-------------|-------------|-------------|
| N | -0.21232600 | -2.03107900 | -0.71992100 |
| S | 0.78036000  | -1.46016400 | -1.96096400 |
| O | 0.17702500  | -0.27586500 | -2.59090900 |
| O | 1.03145700  | -2.61746800 | -2.84288500 |
| C | 2.29682900  | -0.96408400 | -1.18232200 |
| C | 2.90410800  | -1.79837300 | -0.24352800 |
| C | 2.90539800  | 0.21582400  | -1.61334800 |
| C | 4.13879800  | -1.42675700 | 0.28068300  |
| H | 2.42364200  | -2.71570700 | 0.07850800  |
| C | 4.14622600  | 0.55875000  | -1.09057100 |
| H | 2.40696200  | 0.85507900  | -2.33125500 |
| C | 4.77628400  | -0.24914100 | -0.13377100 |
| H | 4.61526200  | -2.06015800 | 1.02227500  |
| H | 4.62239400  | 1.47982300  | -1.41072300 |
| C | 6.08602000  | 0.17341600  | 0.47115400  |
| H | 6.75881200  | 0.58620300  | -0.28614600 |
| H | 5.92027200  | 0.95869100  | 1.21885700  |
| H | 6.58715300  | -0.66106600 | 0.96743400  |
| C | -0.13506000 | -1.65819100 | 0.65703200  |
| C | -0.02756200 | -0.38823400 | 1.23931200  |
| C | 0.03194500  | 0.88222800  | 0.47601000  |
| C | 1.12148400  | 1.80289000  | 0.63013300  |
| C | -0.99550700 | 1.24766200  | -0.36616800 |
| C | 2.23073800  | 1.53463400  | 1.47512700  |
| C | 1.11457000  | 3.02627500  | -0.11835900 |
| C | -1.02808900 | 2.44497500  | -1.10021600 |
| C | 3.26476200  | 2.43541900  | 1.59050100  |
| H | 2.27121400  | 0.59796700  | 2.01539000  |
| C | 2.20515000  | 3.92560300  | 0.01244800  |
| C | 0.02391700  | 3.31845500  | -0.97956200 |

|   |             |             |             |
|---|-------------|-------------|-------------|
| H | -1.87469000 | 2.64778700  | -1.74467500 |
| C | 3.25664900  | 3.64182600  | 0.85308400  |
| H | 4.10349600  | 2.20948300  | 2.24091600  |
| H | 2.18838900  | 4.84546300  | -0.56443100 |
| H | 0.03064000  | 4.24786200  | -1.53960400 |
| H | 4.08321700  | 4.33854700  | 0.94873800  |
| S | -3.22776900 | 0.15778100  | 0.52682700  |
| O | -2.96266600 | 0.95352200  | 1.71780100  |
| O | -3.54848700 | -1.26044900 | 0.59330500  |
| C | -0.72352200 | -3.43601200 | -0.78543100 |
| H | -1.80734700 | -3.38285100 | -0.91790900 |
| H | -0.28456700 | -3.95816000 | -1.63045600 |
| C | -0.36204500 | -4.03558700 | 0.57890800  |
| H | 0.59666300  | -4.56806600 | 0.54059800  |
| H | -1.12293200 | -4.73864800 | 0.92419400  |
| C | -0.25395400 | -2.81215600 | 1.45372700  |
| C | -0.25120400 | -2.72504500 | 2.83582500  |
| H | -0.34484200 | -3.62239400 | 3.43935800  |
| C | -0.13471400 | -1.46645000 | 3.43721600  |
| H | -0.14724300 | -1.37350500 | 4.51787900  |
| C | -0.02717700 | -0.32823900 | 2.64841100  |
| H | 0.02946600  | 0.64837200  | 3.11563700  |
| O | -2.05751400 | 0.33773200  | -0.59103900 |
| C | -4.61300600 | 0.99429600  | -0.40602000 |
| F | -5.71261900 | 0.93824200  | 0.33971200  |
| F | -4.28036200 | 2.26434600  | -0.62805100 |
| F | -4.81100900 | 0.36822300  | -1.55952500 |

*ent-2o*

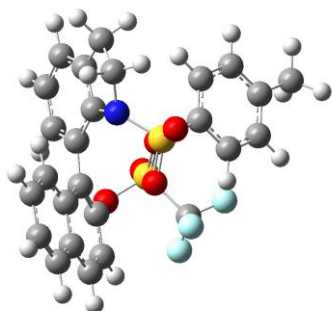

|   |             |             |             |
|---|-------------|-------------|-------------|
| N | -1.16566700 | -2.11096700 | -0.22853100 |
| S | -0.38072000 | -1.52166100 | -1.60540200 |
| O | -0.74718000 | -0.11402800 | -1.79204600 |
| O | -0.73716600 | -2.48406400 | -2.66388800 |
| C | 1.38864200  | -1.55494200 | -1.35661000 |
| C | 2.00333900  | -2.54164800 | -0.59187900 |
| C | 2.13886600  | -0.55438300 | -1.97871800 |
| C | 3.38584300  | -2.50404400 | -0.42415000 |
| H | 1.42961900  | -3.32776800 | -0.12118800 |
| C | 3.51692000  | -0.53551600 | -1.80472500 |
| H | 1.64671100  | 0.20999400  | -2.56540700 |
| C | 4.16123600  | -1.50037100 | -1.01641300 |
| H | 3.86739500  | -3.26358700 | 0.18373900  |
| H | 4.10164100  | 0.24886100  | -2.27536800 |
| C | 5.64872300  | -1.43620400 | -0.79901300 |
| H | 6.18049100  | -1.28779100 | -1.74405200 |
| H | 5.90630800  | -0.59252900 | -0.14813800 |
| H | 6.02421600  | -2.34841300 | -0.32950700 |
| C | -1.02366600 | -1.58284200 | 1.10140300  |
| C | -1.26326700 | -0.28052300 | 1.57241200  |
| C | -1.73584600 | 0.83713800  | 0.72069500  |
| C | -2.95590900 | 0.72431400  | -0.02873200 |
| C | -1.05369300 | 2.03335400  | 0.63758100  |
| C | -3.79715100 | -0.41474700 | 0.06904100  |
| C | -3.35804300 | 1.79298900  | -0.89285900 |
| C | -1.44180300 | 3.10086900  | -0.19456300 |
| C | -4.95302400 | -0.50617800 | -0.67335400 |
| H | -3.52912600 | -1.21512400 | 0.74652700  |
| C | -4.55013000 | 1.66398300  | -1.65202800 |
| C | -2.56791500 | 2.96929200  | -0.96578400 |
| H | -0.83972800 | 4.00144200  | -0.20991600 |
| C | -5.33002100 | 0.53548800  | -1.55219400 |
| H | -5.58299400 | -1.38515900 | -0.58132800 |

|   |             |             |             |
|---|-------------|-------------|-------------|
| H | -4.83508300 | 2.47992400  | -2.30943000 |
| H | -2.87796900 | 3.77414200  | -1.62427700 |
| H | -6.23987300 | 0.44569200  | -2.13688700 |
| S | 1.55757500  | 1.75746300  | 1.27278700  |
| O | 1.59295400  | 0.34592300  | 0.93564500  |
| O | 2.31166400  | 2.29670400  | 2.39451900  |
| C | -1.30979600 | -3.59956700 | -0.09723600 |
| H | -2.38008900 | -3.82002900 | -0.12058900 |
| H | -0.83836600 | -4.10730500 | -0.93466400 |
| C | -0.70764900 | -3.95044000 | 1.27387200  |
| H | 0.31163400  | -4.34578000 | 1.19812500  |
| H | -1.30838900 | -4.70722500 | 1.78366900  |
| C | -0.73697200 | -2.62745900 | 1.99539000  |
| C | -0.57562100 | -2.38181800 | 3.35157000  |
| H | -0.34714400 | -3.19708100 | 4.03076100  |
| C | -0.73278500 | -1.07726500 | 3.82602000  |
| H | -0.61638900 | -0.86242900 | 4.88300300  |
| C | -1.08797900 | -0.05611600 | 2.95019700  |
| H | -1.26491400 | 0.94225700  | 3.33347300  |
| O | 0.04879700  | 2.31684700  | 1.49447000  |
| C | 2.08709500  | 2.70485100  | -0.25413600 |
| F | 3.35719600  | 2.39968600  | -0.50703800 |
| F | 1.32364600  | 2.35938500  | -1.28785900 |
| F | 1.97172600  | 4.00998600  | -0.02525100 |

## References:

1. D. Guo, J. Zhang, B. Zhang and J. Wang, *Org. Lett.*, 2018, **20**, 6284.
2. A. Grandane, S. Belyakov, P. Trapencieris and R. Zalubovskis, *Tetrahedron*, 2012, **68**, 5541.
3. K. Jouvin, A. Coste, A. Bayle, F. Legrand, G. Karthikeyan, K. Tadiparthi and G. Evano, *Organometallics*, 2012, **31**, 7933.
4. X. Yi and X. Hu, *Angew. Chem., Int. Ed.*, 2019, **58**, 4700.
5. H.-H. Zhang, C.-S. Wang, C. Li, G.-J. Mei, Y. Li and F. Shi, *Angew. Chem., Int. Ed.*, 2017, **56**, 116.
6. W. Xia, Q.-J. An, S.-H. Xiang, S. Li, Y.-B. Wang and B. Tan, *Angew. Chem., Int. Ed.*, 2020, **59**, 6775.
7. M. J. Frisch, G. W. Trucks, H. B. Schlegel, G. E. Scuseria, M. A. Robb, J. R. Cheeseman, G. Scalmani, V. Barone, G. A. Petersson, H. Nakatsuji, X. Li, M. Caricato, A. V. Marenich, J. Bloino, B. G. Janesko, R. Gomperts, B. Mennucci, H. P. Hratchian, J. V. Ortiz, A. F. Izmaylov, J. L. Sonnenberg, D. Williams-Young, F. Ding, F. Lipparini, F. Egidi, J. Goings, B. Peng, A. Petrone, T. Henderson, D. Ranasinghe, V. G. Zakrzewski, J. Gao, N. Rega, G. Zheng, W. Liang, M. Hada, M. Ehara, K. Toyota, R. Fukuda, J. Hasegawa, M. Ishida, T. Nakajima, Y. Honda, O. Kitao, H. Nakai, T. Vreven, K. Throssell, J. A. Montgomery, J. E. Jr., Peralta, F. Ogliaro, M. J. Bearpark, J. J. Heyd, E. N. Brothers, K. N. Kudin, V. N. Staroverov, T. A. Keith, R. Kobayashi, J. Normand, K. Raghavachari, A. P. Rendell, J. C. Burant, S. S. Iyengar, J. Tomasi, M. Cossi, J. M. Millam, M. Klene, C. Adamo, R. Cammi, J. W. Ochterski, R. L. Martin, K. Morokuma, O. Farkas, J. B. Foresman and D. J. Fox, *Gaussian 16*, Revision A.03; Gaussian Inc.: Wallingford, CT, 2016.
8. C. Lee, W. Yang and R. G. Parr, *Phys. Rev. B: Condens. Matter Mater. Phys.*, 1988, **37**, 785.
9. A. D. Becke, *J. Chem. Phys.*, 1993, **98**, 5648.
10. S. Grimme, J. Antony, S. Ehrlich and H. Krieg, *J. Chem. Phys.*, 2010, **132**, 154104.
11. R. Ditchfield, W. J. Hehre and J. A. Pople, *J. Chem. Phys.*, 1971, **54**, 724.
12. W. J. Hehre, R. Ditchfield and J. A. Pople, *J. Chem. Phys.*, 1972, **56**, 2257.

13. A. V. Marenich, C. J. Cramer and D. G. Truhlar, *J. Phys. Chem. B*, 2009, **113**, 6378.
14. C. Y. Legault, *CYLView, 1.0b*; Université de Sherbrooke, 2020.  
(<http://www.cylview.org>).



## 9. HPLC Chromatograms

Compound **2a**: HPLC (IA, *n*-hexane/2-propanol = 70/30,  $v = 1.0$  mL/min,  $\lambda = 254$  nm)

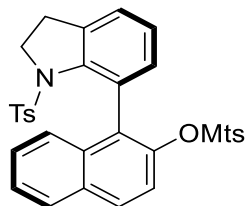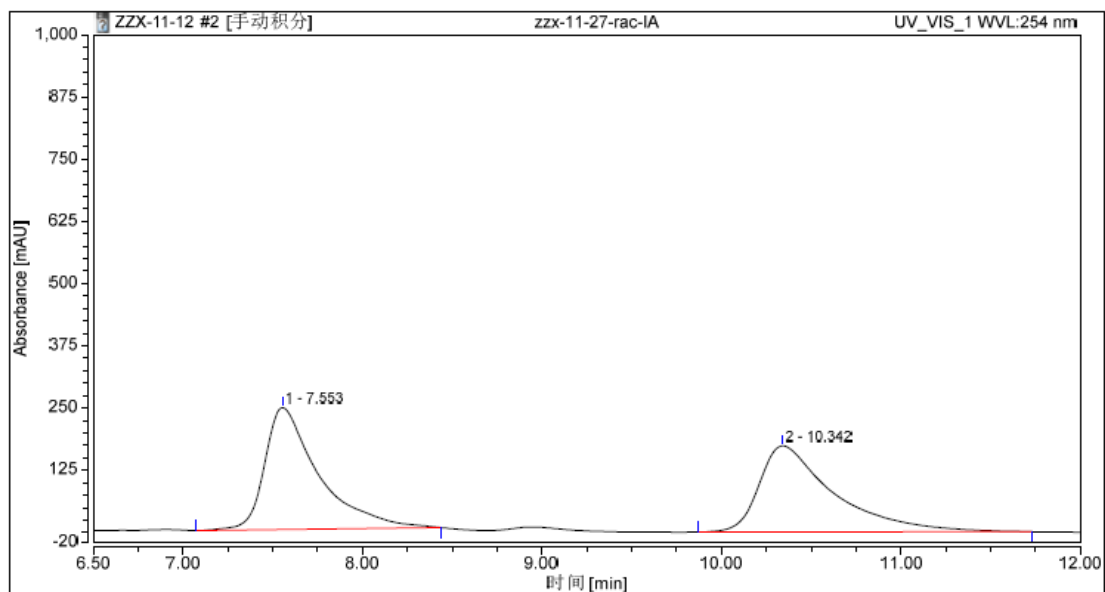

**Integration Results**

| No.    | Peak Name | Retention Time min | Area mAU*min | Height mAU | Relative Area % | Relative Height % | Amount |
|--------|-----------|--------------------|--------------|------------|-----------------|-------------------|--------|
| 1      |           | 7.553              | 85.128       | 244.591    | 50.58           | 58.56             | n.a.   |
| 2      |           | 10.342             | 83.171       | 173.097    | 49.42           | 41.44             | n.a.   |
| Total: |           |                    | 168.299      | 417.688    | 100.00          | 100.00            |        |

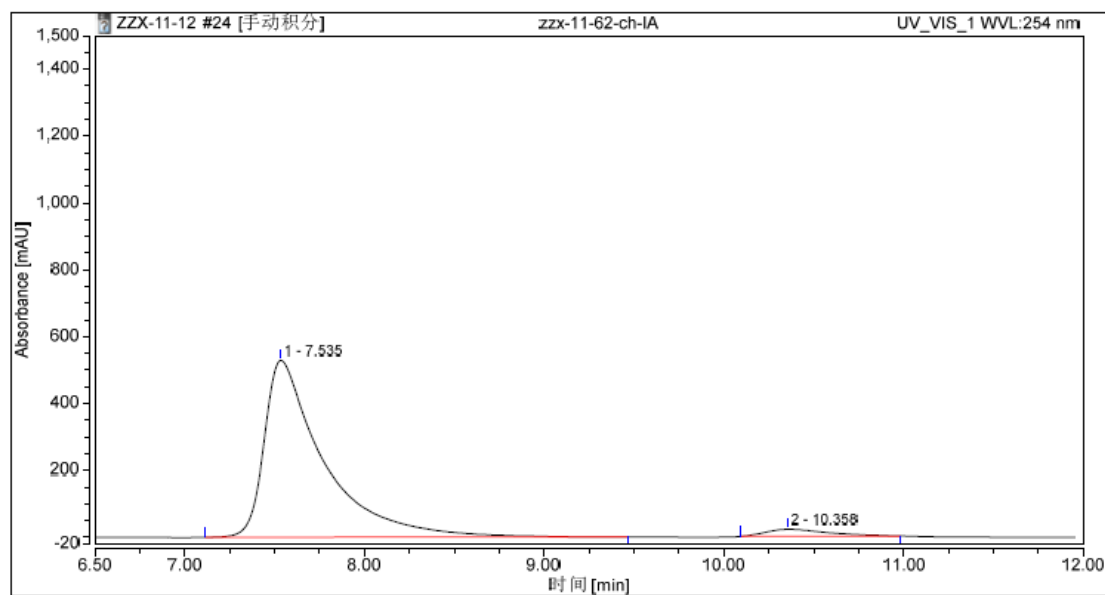

**Integration Results**

| No.    | Peak Name | Retention Time min | Area mAU*min | Height mAU | Relative Area % | Relative Height % | Amount |
|--------|-----------|--------------------|--------------|------------|-----------------|-------------------|--------|
| 1      |           | 7.535              | 202.673      | 529.135    | 96.00           | 96.15             | n.a.   |
| 2      |           | 10.358             | 8.445        | 21.165     | 4.00            | 3.85              | n.a.   |
| Total: |           |                    | 211.119      | 550.300    | 100.00          | 100.00            |        |

Compound **2b**: HPLC (IA, *n*-hexane/2-propanol = 70/30,  $v = 1.0$  mL/min,  $\lambda = 254$  nm)

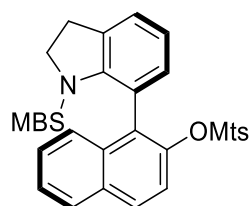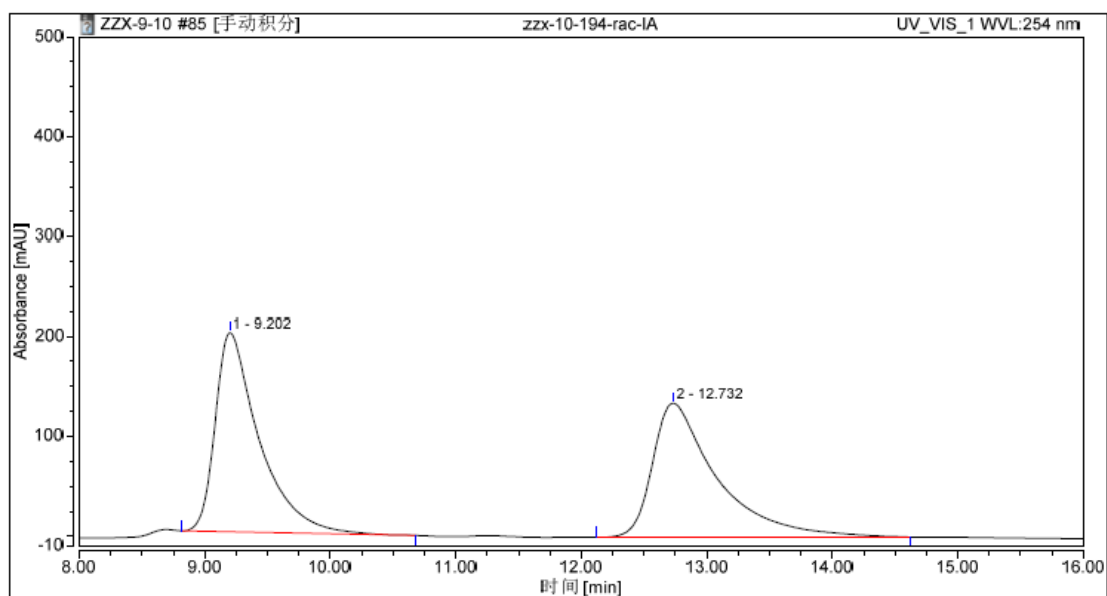

| Integration Results |           |                    |              |            |                 |                   |             |
|---------------------|-----------|--------------------|--------------|------------|-----------------|-------------------|-------------|
| No.                 | Peak Name | Retention Time min | Area mAU*min | Height mAU | Relative Area % | Relative Height % | Amount n.a. |
| 1                   |           | 9.202              | 80.771       | 199.326    | 50.32           | 59.74             | n.a.        |
| 2                   |           | 12.732             | 79.747       | 134.338    | 49.68           | 40.26             | n.a.        |
| Total:              |           |                    | 160.518      | 333.664    | 100.00          | 100.00            |             |

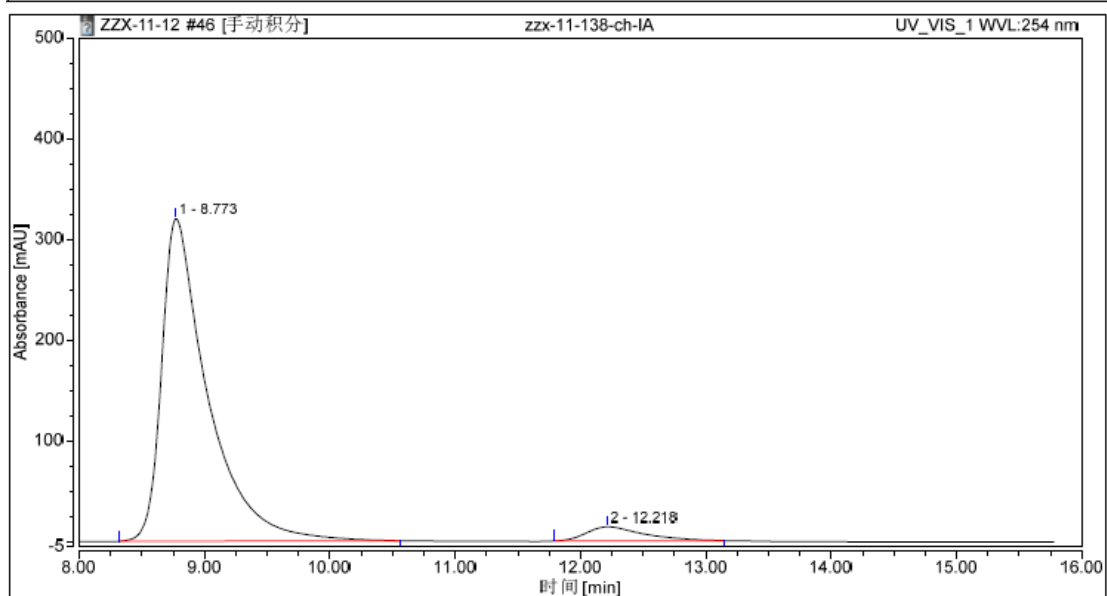

| Integration Results |           |                    |              |            |                 |                   |             |
|---------------------|-----------|--------------------|--------------|------------|-----------------|-------------------|-------------|
| No.                 | Peak Name | Retention Time min | Area mAU*min | Height mAU | Relative Area % | Relative Height % | Amount n.a. |
| 1                   |           | 8.773              | 136.302      | 320.229    | 94.88           | 95.82             | n.a.        |
| 2                   |           | 12.218             | 7.362        | 13.967     | 5.12            | 4.18              | n.a.        |
| Total:              |           |                    | 143.664      | 334.196    | 100.00          | 100.00            |             |

Compound **2c**: HPLC (IA, *n*-hexane/2-propanol = 70/30,  $v = 1.0$  mL/min,  $\lambda = 254$  nm)

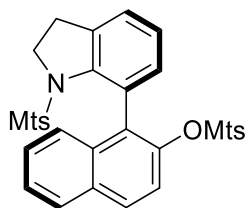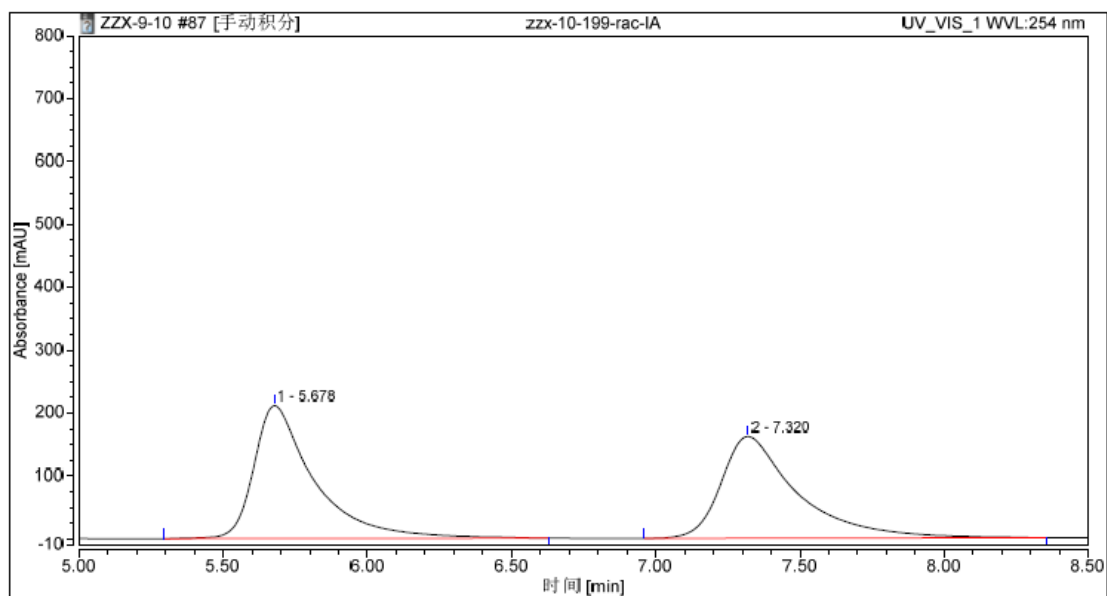

| Integration Results |           |                       |                 |               |                    |                      |                |
|---------------------|-----------|-----------------------|-----------------|---------------|--------------------|----------------------|----------------|
| No.                 | Peak Name | Retention Time<br>min | Area<br>mAU*min | Height<br>mAU | Relative Area<br>% | Relative Height<br>% | Amount<br>n.a. |
| 1                   |           | 5.678                 | 51.331          | 211.118       | 50.82              | 56.62                | n.a.           |
| 2                   |           | 7.320                 | 49.676          | 161.781       | 49.18              | 43.38                | n.a.           |
| Total:              |           |                       | 101.008         | 372.900       | 100.00             | 100.00               |                |

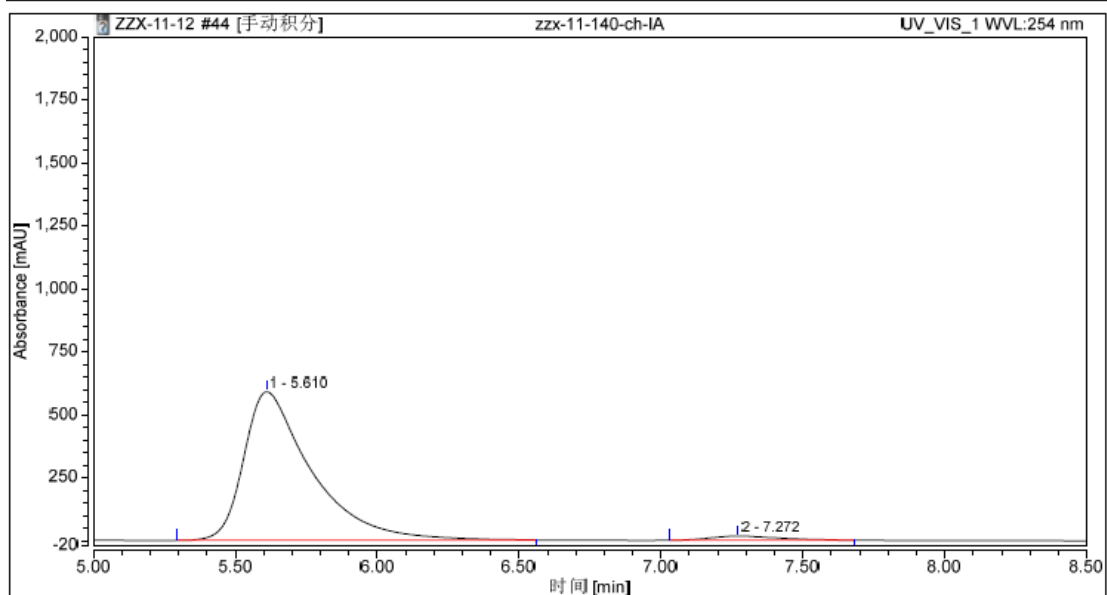

| Integration Results |           |                       |                 |               |                    |                      |                |
|---------------------|-----------|-----------------------|-----------------|---------------|--------------------|----------------------|----------------|
| No.                 | Peak Name | Retention Time<br>min | Area<br>mAU*min | Height<br>mAU | Relative Area<br>% | Relative Height<br>% | Amount<br>n.a. |
| 1                   |           | 5.610                 | 163.397         | 589.432       | 97.25              | 97.31                | n.a.           |
| 2                   |           | 7.272                 | 4.624           | 16.314        | 2.75               | 2.69                 | n.a.           |
| Total:              |           |                       | 168.021         | 605.746       | 100.00             | 100.00               |                |

Compound **2d**: HPLC (ADH, *n*-hexane/2-propanol = 70/30,  $v = 1.0$  mL/min,  $\lambda = 254$  nm)

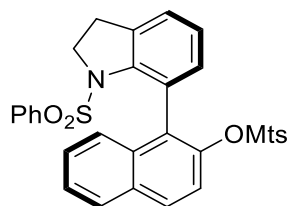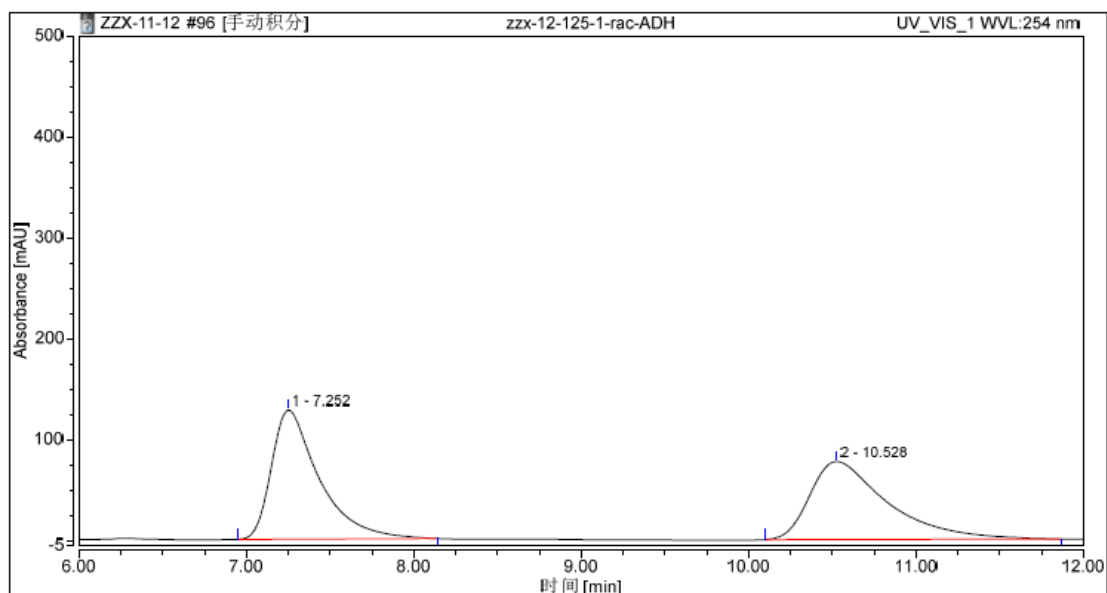

| Integration Results |           |                    |              |            |                 |                   |        |
|---------------------|-----------|--------------------|--------------|------------|-----------------|-------------------|--------|
| No.                 | Peak Name | Retention Time min | Area mAU*min | Height mAU | Relative Area % | Relative Height % | Amount |
| 1                   |           | 7.252              | 42.300       | 127.880    | 50.61           | 62.34             | n.a.   |
| 2                   |           | 10.528             | 41.281       | 77.251     | 49.39           | 37.66             | n.a.   |
| Total:              |           |                    | 83.581       | 205.131    | 100.00          | 100.00            |        |

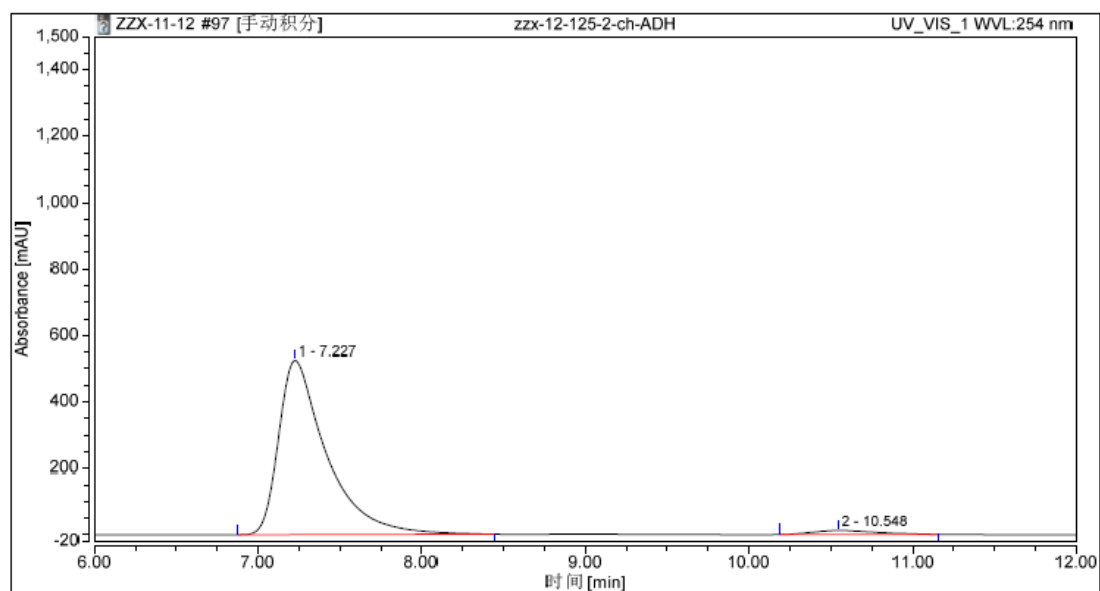

| Integration Results |           |                    |              |            |                 |                   |        |
|---------------------|-----------|--------------------|--------------|------------|-----------------|-------------------|--------|
| No.                 | Peak Name | Retention Time min | Area mAU*min | Height mAU | Relative Area % | Relative Height % | Amount |
| 1                   |           | 7.227              | 177.848      | 524.188    | 97.11           | 97.77             | n.a.   |
| 2                   |           | 10.548             | 5.299        | 11.949     | 2.89            | 2.23              | n.a.   |
| Total:              |           |                    | 183.148      | 536.137    | 100.00          | 100.00            |        |

Compound **2e**: HPLC (IA, *n*-hexane/2-propanol = 70/30,  $v = 1.0$  mL/min,  $\lambda = 254$  nm)

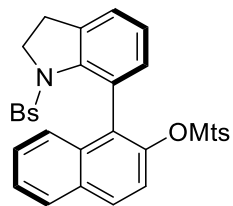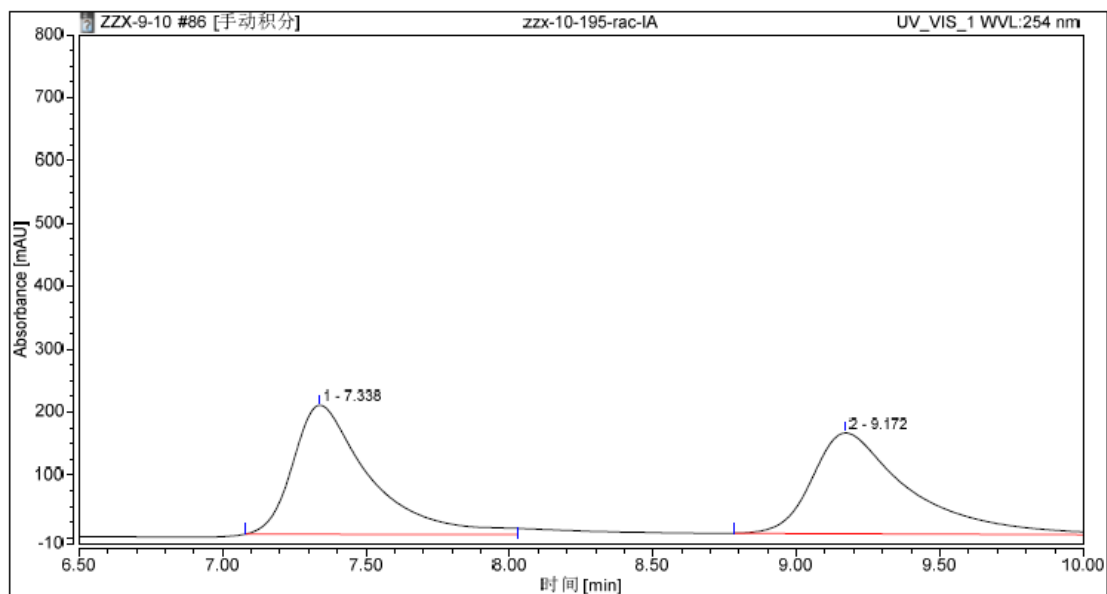

| Integration Results |           |                       |                 |               |                    |                      |                |
|---------------------|-----------|-----------------------|-----------------|---------------|--------------------|----------------------|----------------|
| No.                 | Peak Name | Retention Time<br>min | Area<br>mAU*min | Height<br>mAU | Relative Area<br>% | Relative Height<br>% | Amount<br>n.a. |
| 1                   |           | 7.338                 | 63.482          | 205.186       | 50.19              | 56.16                | n.a.           |
| 2                   |           | 9.172                 | 63.006          | 160.142       | 49.81              | 43.84                | n.a.           |
| Total:              |           |                       | 126.488         | 365.328       | 100.00             | 100.00               |                |

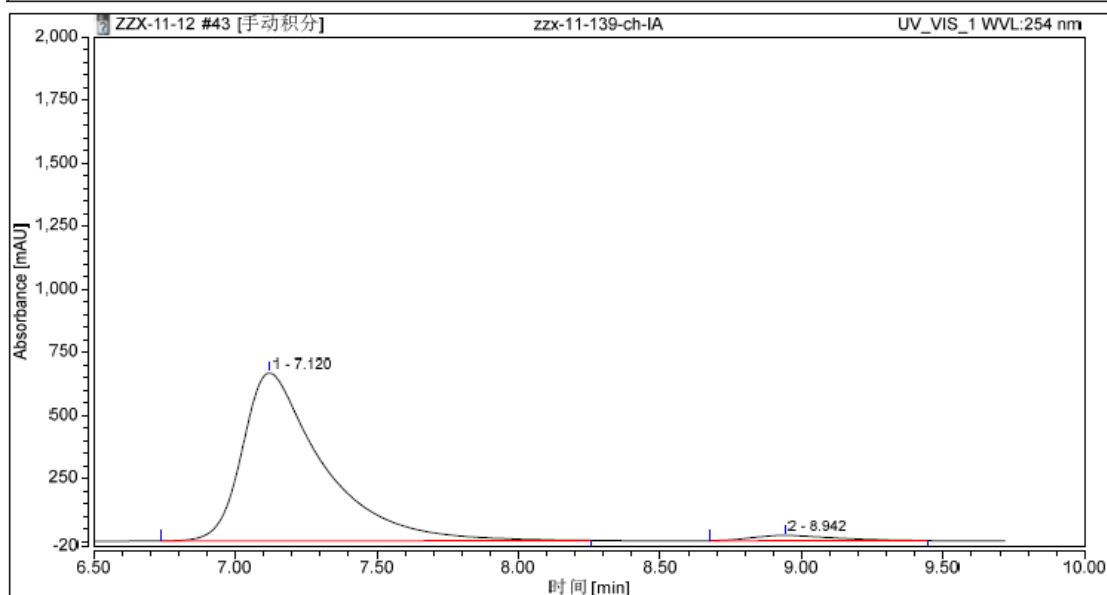

| Integration Results |           |                       |                 |               |                    |                      |                |
|---------------------|-----------|-----------------------|-----------------|---------------|--------------------|----------------------|----------------|
| No.                 | Peak Name | Retention Time<br>min | Area<br>mAU*min | Height<br>mAU | Relative Area<br>% | Relative Height<br>% | Amount<br>n.a. |
| 1                   |           | 7.120                 | 219.064         | 665.235       | 96.93              | 96.97                | n.a.           |
| 2                   |           | 8.942                 | 6.940           | 20.804        | 3.07               | 3.03                 | n.a.           |
| Total:              |           |                       | 226.004         | 686.039       | 100.00             | 100.00               |                |

Compound **2f**: HPLC (IA, *n*-hexane/2-propanol = 70/30,  $v = 1.0$  mL/min,  $\lambda = 254$  nm)

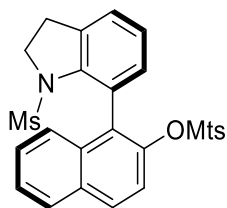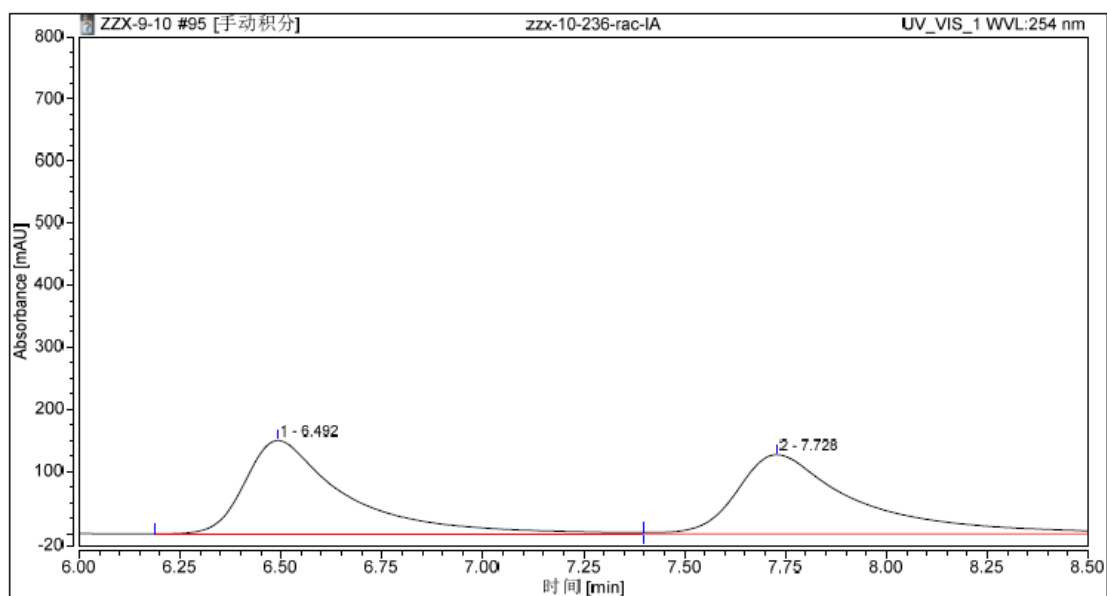

| Integration Results |           |                       |                 |               |                    |                      |                |
|---------------------|-----------|-----------------------|-----------------|---------------|--------------------|----------------------|----------------|
| No.                 | Peak Name | Retention Time<br>min | Area<br>mAU*min | Height<br>mAU | Relative Area<br>% | Relative Height<br>% | Amount<br>n.a. |
| 1                   |           | 6.492                 | 43.311          | 150.301       | 49.31              | 54.08                | n.a.           |
| 2                   |           | 7.728                 | 44.516          | 127.617       | 50.69              | 45.92                | n.a.           |
| Total:              |           |                       | 87.827          | 277.919       | 100.00             | 100.00               |                |

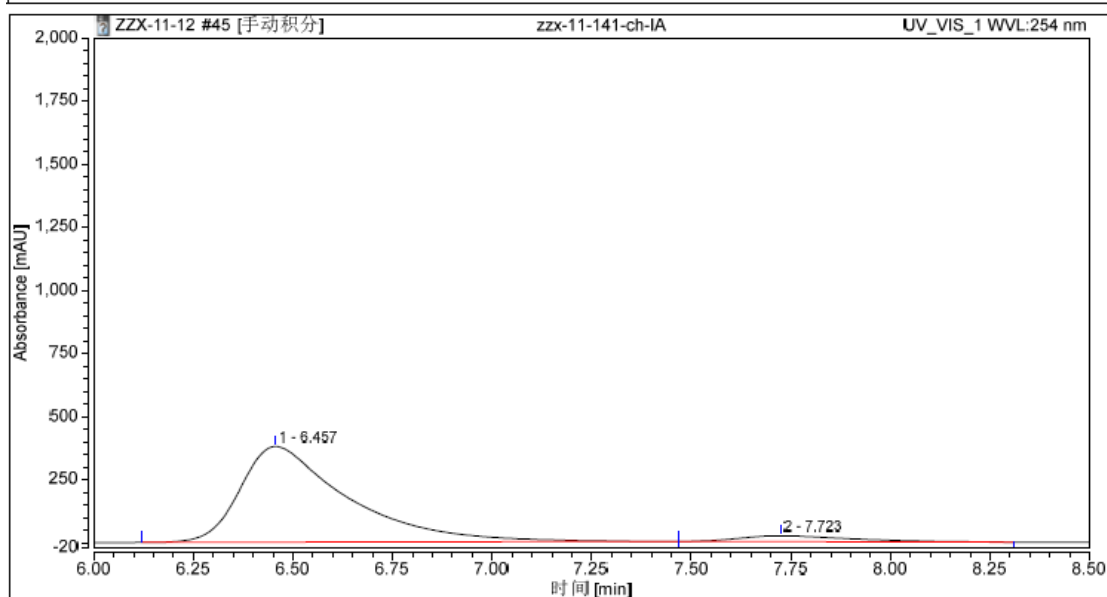

| Integration Results |           |                       |                 |               |                    |                      |                |
|---------------------|-----------|-----------------------|-----------------|---------------|--------------------|----------------------|----------------|
| No.                 | Peak Name | Retention Time<br>min | Area<br>mAU*min | Height<br>mAU | Relative Area<br>% | Relative Height<br>% | Amount<br>n.a. |
| 1                   |           | 6.457                 | 118.527         | 379.312       | 94.06              | 94.17                | n.a.           |
| 2                   |           | 7.723                 | 7.490           | 23.490        | 5.94               | 5.83                 | n.a.           |
| Total:              |           |                       | 126.017         | 402.802       | 100.00             | 100.00               |                |

Compound **2g**: HPLC (IA, *n*-hexane/2-propanol = 70/30,  $v = 1.0$  mL/min,  $\lambda = 254$  nm)

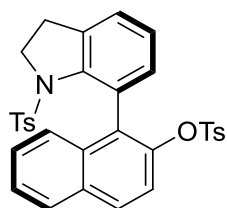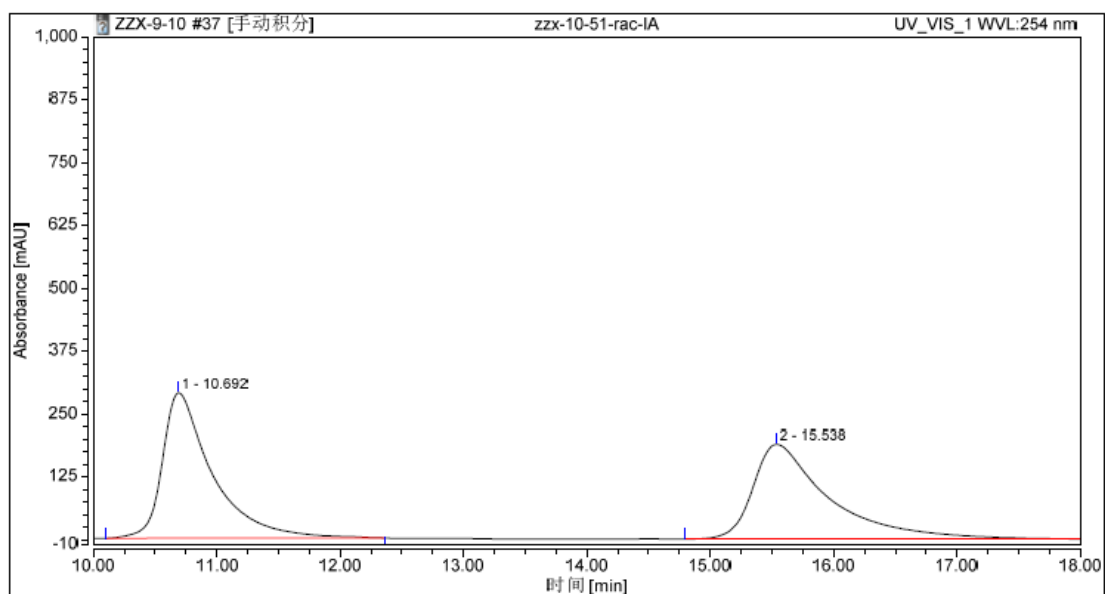

| Integration Results |           |                       |                 |               |                    |                      |                |
|---------------------|-----------|-----------------------|-----------------|---------------|--------------------|----------------------|----------------|
| No.                 | Peak Name | Retention Time<br>min | Area<br>mAU*min | Height<br>mAU | Relative Area<br>% | Relative Height<br>% | Amount<br>n.a. |
| 1                   |           | 10.692                | 135.800         | 288.920       | 50.40              | 60.55                | n.a.           |
| 2                   |           | 15.538                | 133.639         | 188.229       | 49.60              | 39.45                | n.a.           |
| Total:              |           |                       | 269.438         | 477.149       | 100.00             | 100.00               |                |

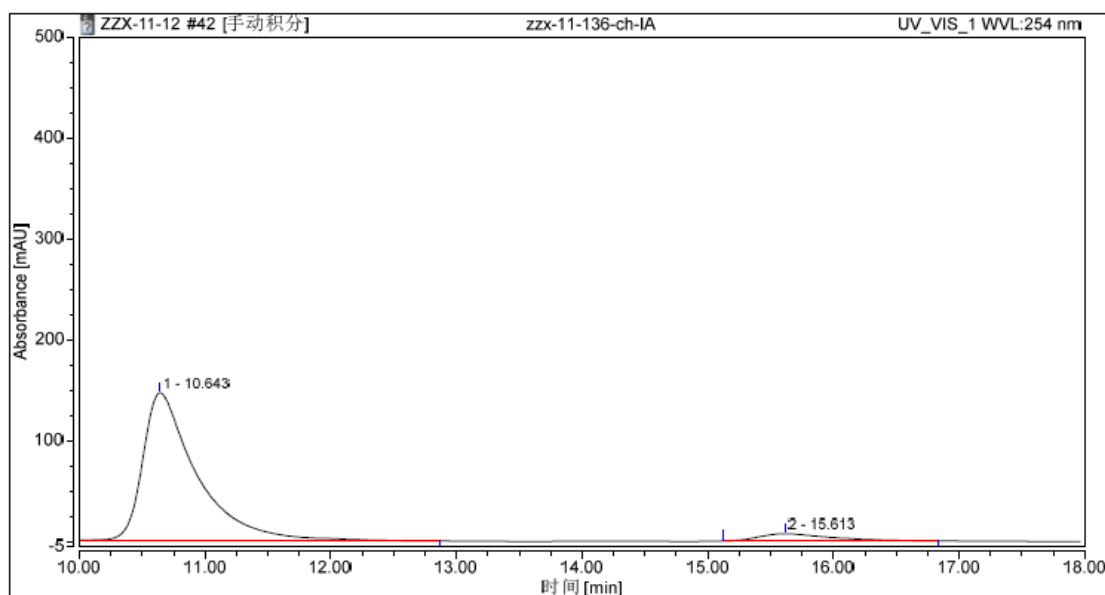

| Integration Results |           |                       |                 |               |                    |                      |                |
|---------------------|-----------|-----------------------|-----------------|---------------|--------------------|----------------------|----------------|
| No.                 | Peak Name | Retention Time<br>min | Area<br>mAU*min | Height<br>mAU | Relative Area<br>% | Relative Height<br>% | Amount<br>n.a. |
| 1                   |           | 10.643                | 73.929          | 146.777       | 93.86              | 95.26                | n.a.           |
| 2                   |           | 15.613                | 4.832           | 7.304         | 6.14               | 4.74                 | n.a.           |
| Total:              |           |                       | 78.761          | 154.081       | 100.00             | 100.00               |                |

Compound **2h**: HPLC (IA, *n*-hexane/2-propanol = 90/10,  $v = 1.0$  mL/min,  $\lambda = 254$  nm)

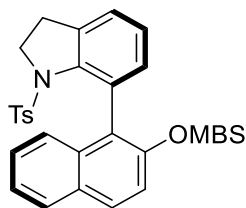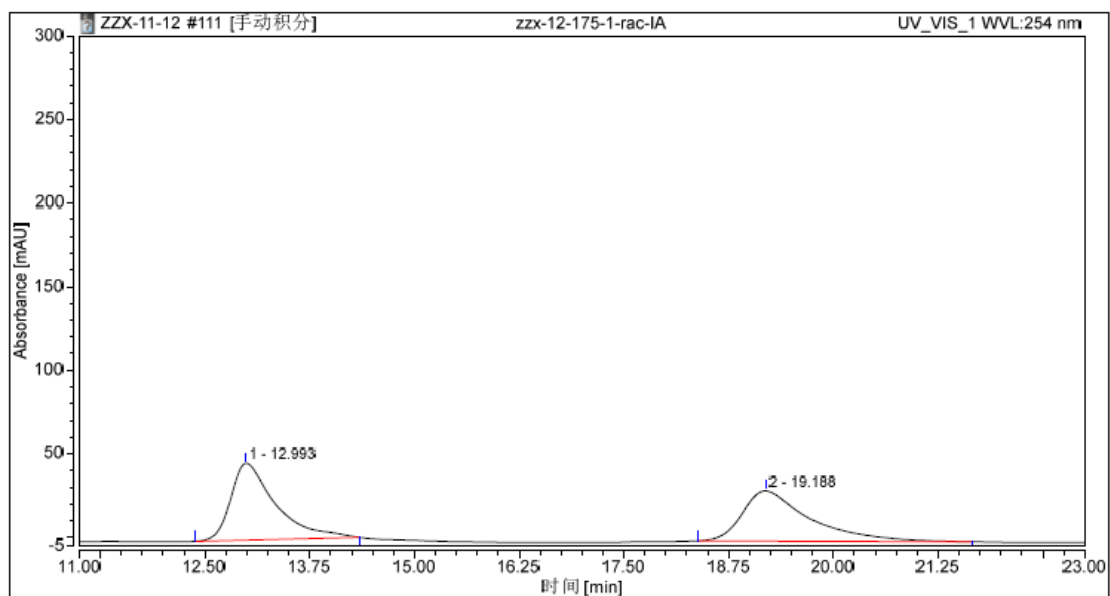

| Integration Results |           |                    |              |            |                 |                   |        |
|---------------------|-----------|--------------------|--------------|------------|-----------------|-------------------|--------|
| No.                 | Peak Name | Retention Time min | Area mAU*min | Height mAU | Relative Area % | Relative Height % | Amount |
| 1                   |           | 12.993             | 28.363       | 46.060     | 50.37           | 60.54             | n.a.   |
| 2                   |           | 19.188             | 27.942       | 30.019     | 49.63           | 39.46             | n.a.   |
| Total:              |           |                    | 56.304       | 76.079     | 100.00          | 100.00            |        |

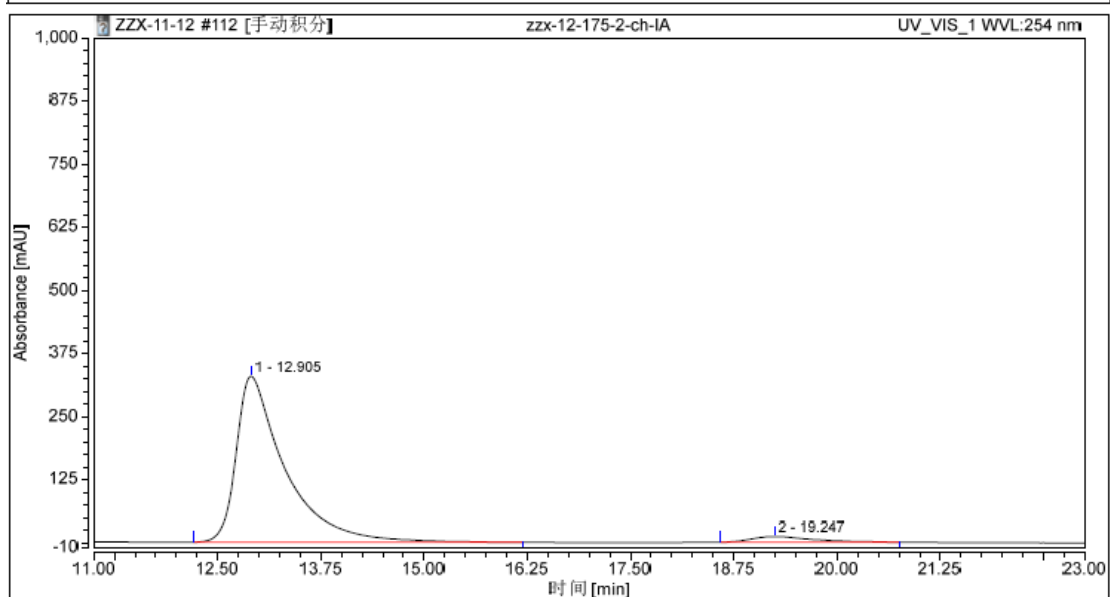

| Integration Results |           |                    |              |            |                 |                   |        |
|---------------------|-----------|--------------------|--------------|------------|-----------------|-------------------|--------|
| No.                 | Peak Name | Retention Time min | Area mAU*min | Height mAU | Relative Area % | Relative Height % | Amount |
| 1                   |           | 12.905             | 225.347      | 328.913    | 95.90           | 96.65             | n.a.   |
| 2                   |           | 19.247             | 9.632        | 11.386     | 4.10            | 3.35              | n.a.   |
| Total:              |           |                    | 234.978      | 340.299    | 100.00          | 100.00            |        |



Compound **2i**: HPLC (IA, *n*-hexane/2-propanol = 70/30,  $v = 1.0$  mL/min,  $\lambda = 254$  nm)

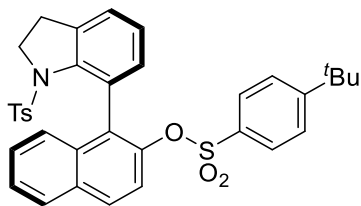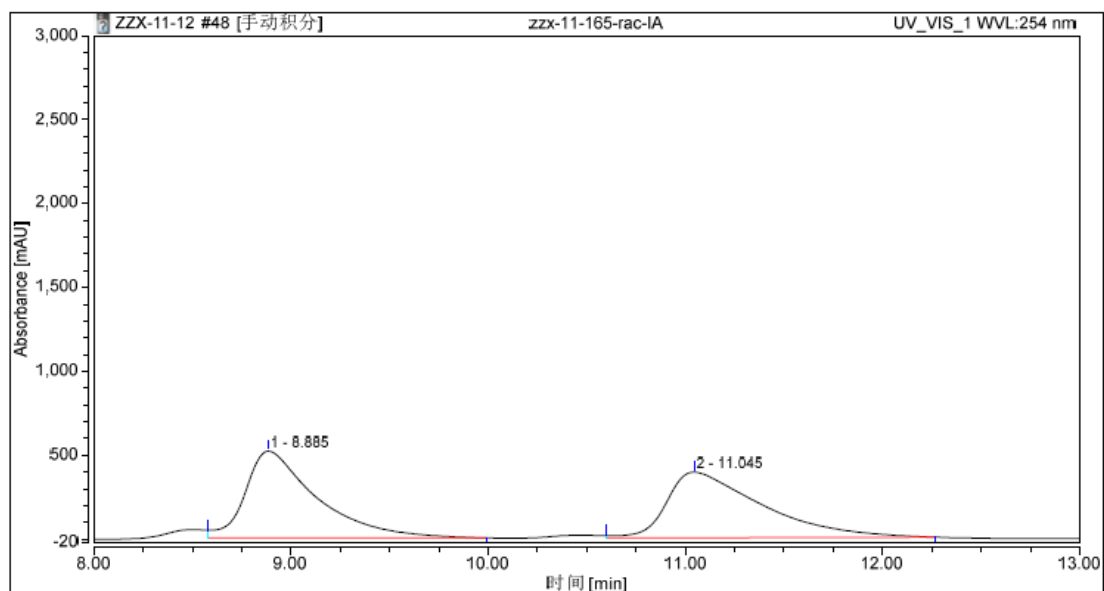

| Integration Results |           |                       |                 |               |                    |                      |                |
|---------------------|-----------|-----------------------|-----------------|---------------|--------------------|----------------------|----------------|
| No.                 | Peak Name | Retention Time<br>min | Area<br>mAU*min | Height<br>mAU | Relative Area<br>% | Relative Height<br>% | Amount<br>n.a. |
| 1                   |           | 8.885                 | 215.606         | 515.561       | 49.77              | 56.86                | n.a.           |
| 2                   |           | 11.045                | 217.600         | 391.101       | 50.23              | 43.14                | n.a.           |
| Total:              |           |                       | 433.206         | 906.662       | 100.00             | 100.00               |                |

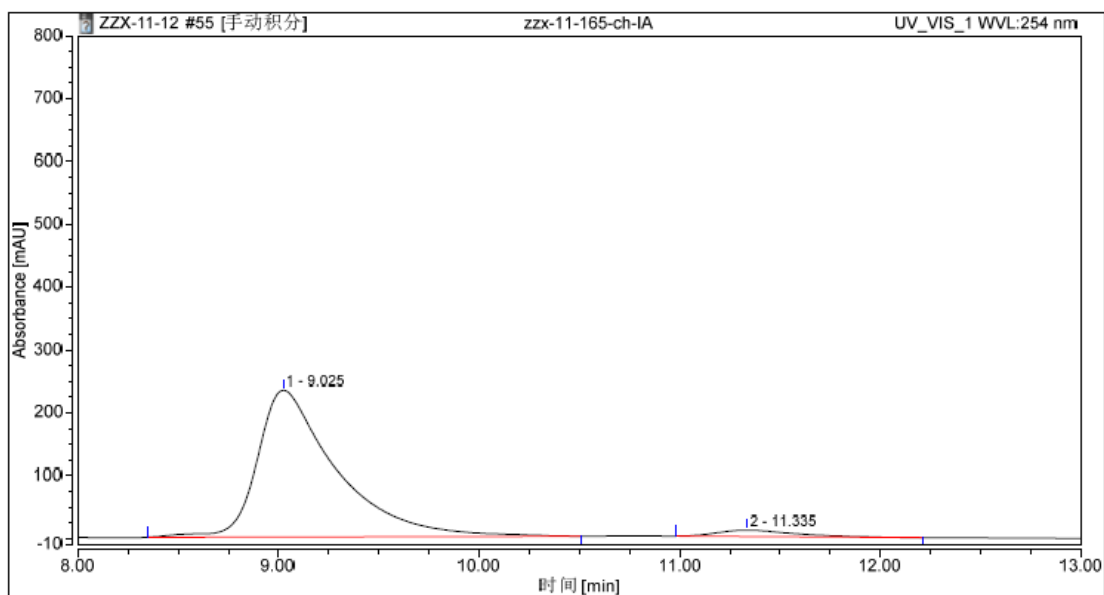

| Integration Results |           |                       |                 |               |                    |                      |                |
|---------------------|-----------|-----------------------|-----------------|---------------|--------------------|----------------------|----------------|
| No.                 | Peak Name | Retention Time<br>min | Area<br>mAU*min | Height<br>mAU | Relative Area<br>% | Relative Height<br>% | Amount<br>n.a. |
| 1                   |           | 9.025                 | 106.719         | 233.311       | 95.89              | 95.81                | n.a.           |
| 2                   |           | 11.335                | 4.579           | 10.194        | 4.11               | 4.19                 | n.a.           |
| Total:              |           |                       | 111.299         | 243.505       | 100.00             | 100.00               |                |

Compound **2j**: HPLC (IA, *n*-hexane/2-propanol = 70/30,  $v = 1.0$  mL/min,  $\lambda = 254$  nm)

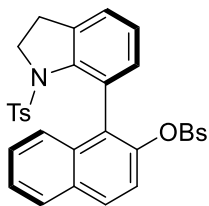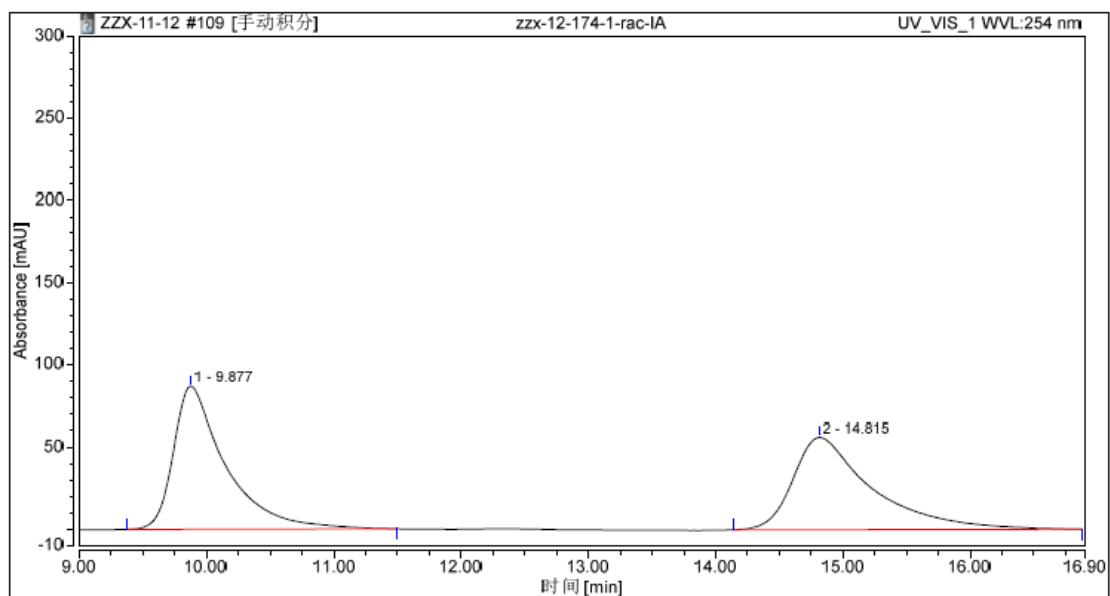

| No.    | Peak Name | Retention Time min | Area mAU*min | Height mAU | Relative Area % | Relative Height % | Amount |
|--------|-----------|--------------------|--------------|------------|-----------------|-------------------|--------|
| 1      |           | 9.877              | 41.199       | 86.938     | 50.63           | 60.82             | n.a.   |
| 2      |           | 14.815             | 40.173       | 56.004     | 49.37           | 39.18             | n.a.   |
| Total: |           |                    | 81.372       | 142.943    | 100.00          | 100.00            |        |

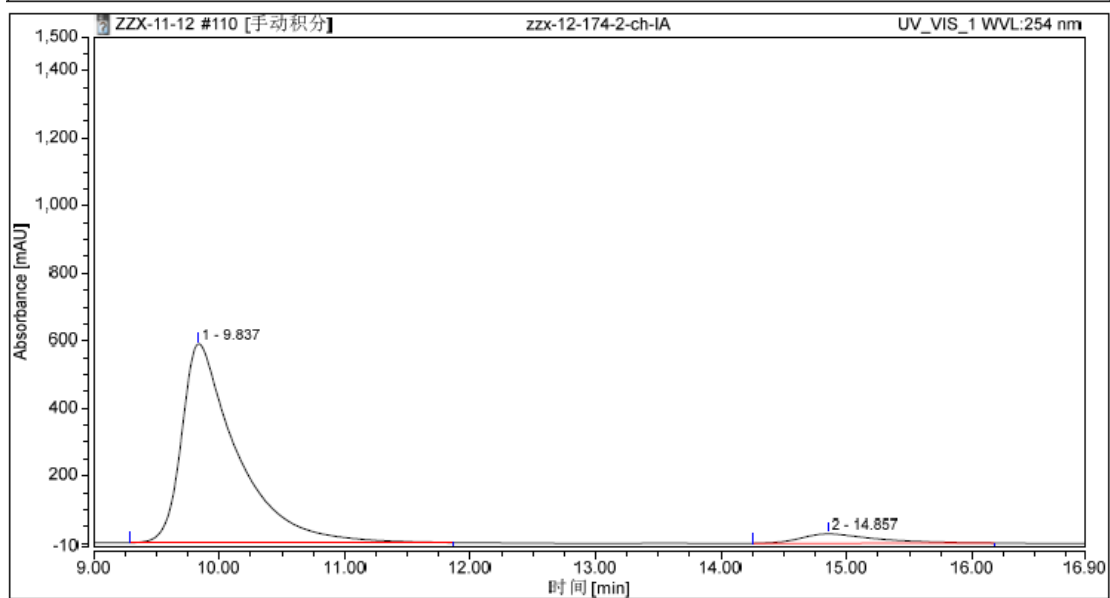

| No.    | Peak Name | Retention Time min | Area mAU*min | Height mAU | Relative Area % | Relative Height % | Amount |
|--------|-----------|--------------------|--------------|------------|-----------------|-------------------|--------|
| 1      |           | 9.837              | 302.332      | 588.668    | 94.07           | 95.48             | n.a.   |
| 2      |           | 14.857             | 19.065       | 27.854     | 5.93            | 4.52              | n.a.   |
| Total: |           |                    | 321.397      | 616.522    | 100.00          | 100.00            |        |

Compound **2k**: HPLC (IA, *n*-hexane/2-propanol = 50/50,  $v = 1.0$  mL/min,  $\lambda = 254$  nm)

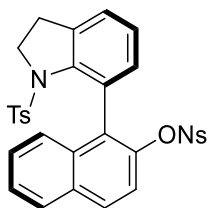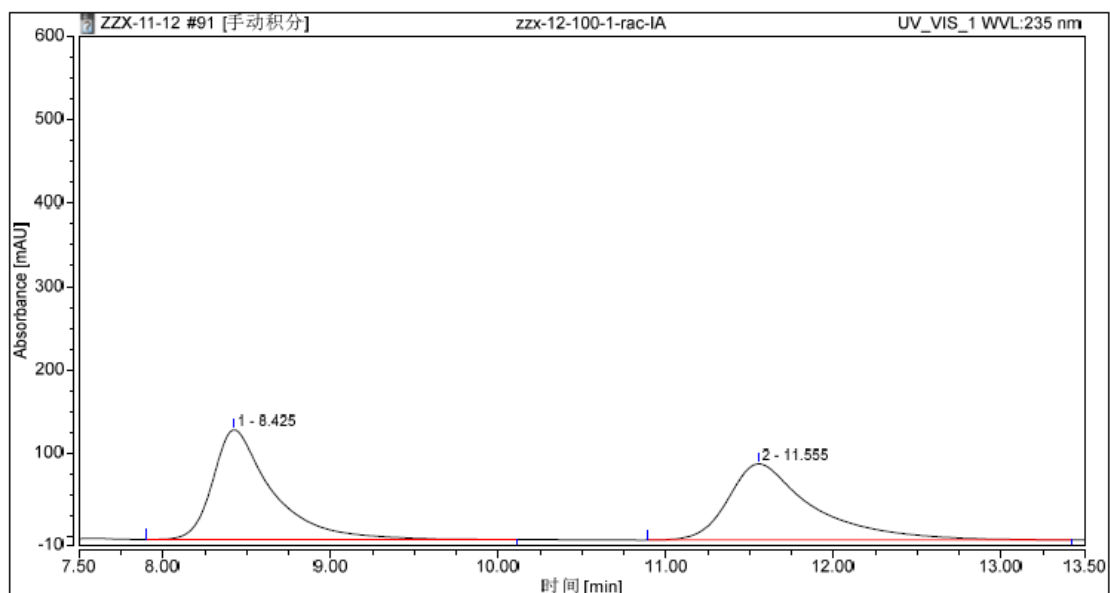

| Integration Results |           |                    |              |            |                 |                   |        |
|---------------------|-----------|--------------------|--------------|------------|-----------------|-------------------|--------|
| No.                 | Peak Name | Retention Time min | Area mAU*min | Height mAU | Relative Area % | Relative Height % | Amount |
| 1                   |           | 8.425              | 53.980       | 131.267    | 50.40           | 59.05             | n.a.   |
| 2                   |           | 11.555             | 53.118       | 91.043     | 49.60           | 40.95             | n.a.   |
| Total:              |           |                    | 107.098      | 222.310    | 100.00          | 100.00            |        |

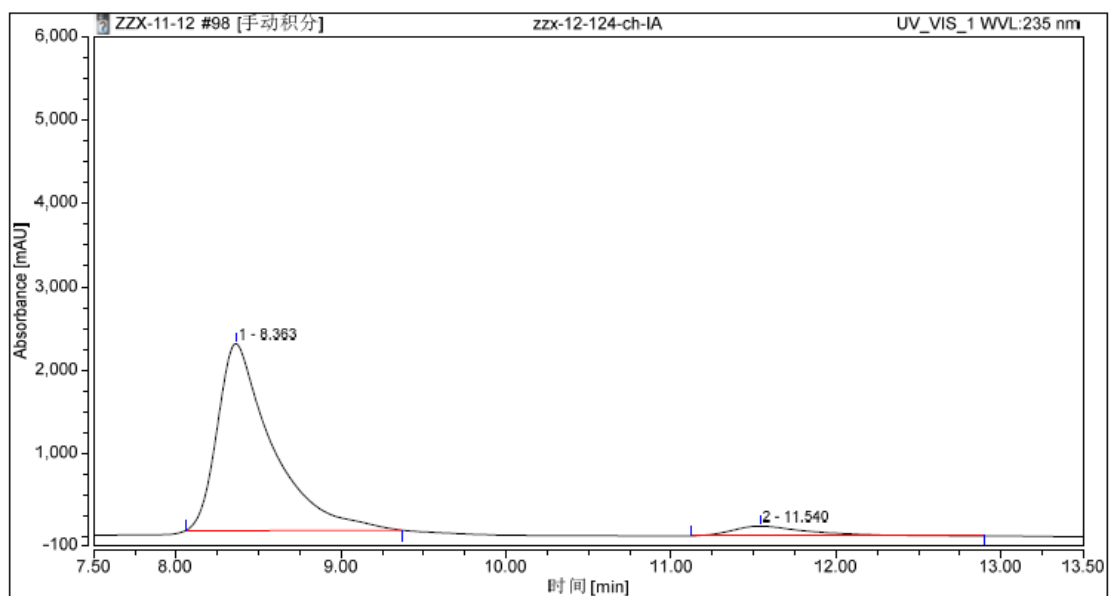

| Integration Results |           |                    |              |            |                 |                   |        |
|---------------------|-----------|--------------------|--------------|------------|-----------------|-------------------|--------|
| No.                 | Peak Name | Retention Time min | Area mAU*min | Height mAU | Relative Area % | Relative Height % | Amount |
| 1                   |           | 8.363              | 863.908      | 2238.703   | 93.13           | 95.03             | n.a.   |
| 2                   |           | 11.540             | 63.735       | 117.023    | 6.87            | 4.97              | n.a.   |
| Total:              |           |                    | 927.643      | 2355.725   | 100.00          | 100.00            |        |

Compound **21**: HPLC (IA, *n*-hexane/2-propanol = 50/50,  $v = 1.0$  mL/min,  $\lambda = 254$  nm)

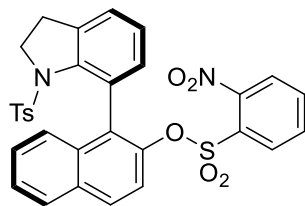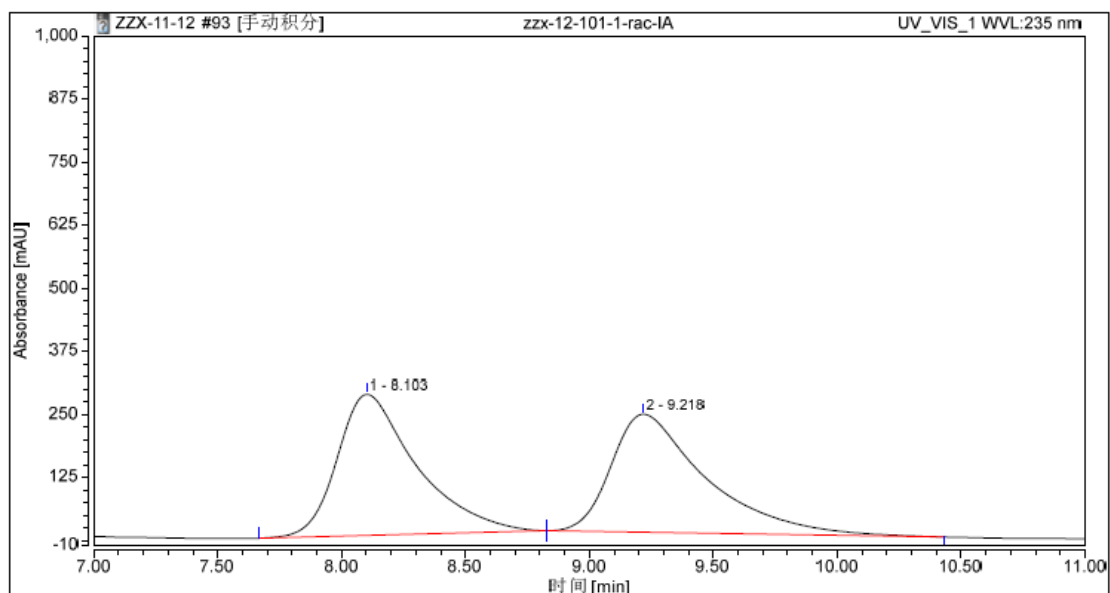

| Integration Results |           |                    |              |            |                 |                   |        |
|---------------------|-----------|--------------------|--------------|------------|-----------------|-------------------|--------|
| No.                 | Peak Name | Retention Time min | Area mAU*min | Height mAU | Relative Area % | Relative Height % | Amount |
| 1                   |           | 8.103              | 103.388      | 279.272    | 49.97           | 54.41             | n.a.   |
| 2                   |           | 9.218              | 103.515      | 233.954    | 50.03           | 45.59             | n.a.   |
| Total:              |           |                    | 206.903      | 513.226    | 100.00          | 100.00            |        |

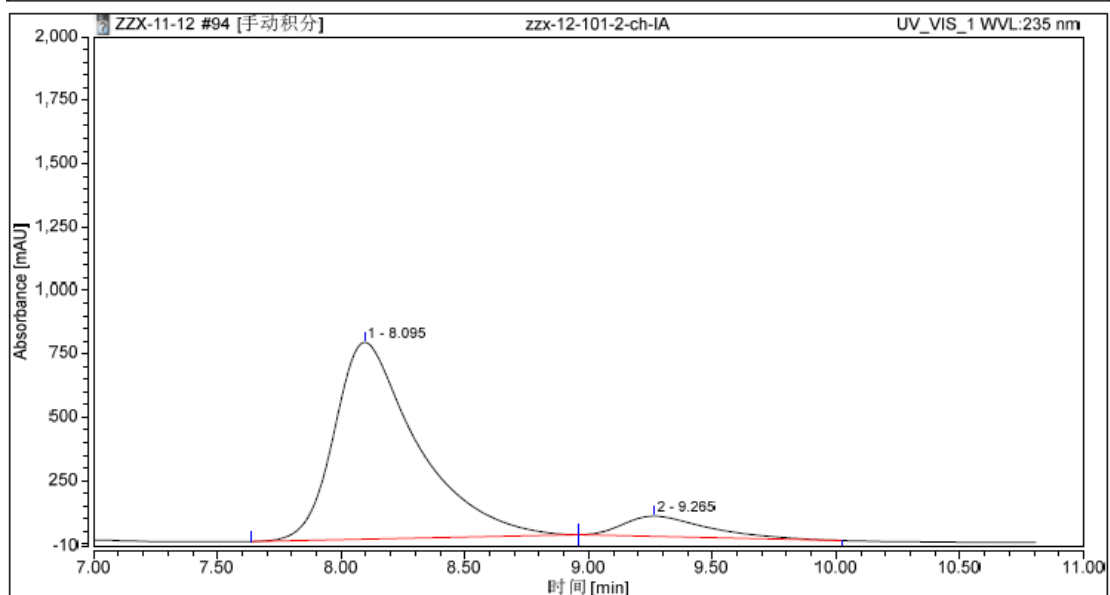

| Integration Results |           |                    |              |            |                 |                   |        |
|---------------------|-----------|--------------------|--------------|------------|-----------------|-------------------|--------|
| No.                 | Peak Name | Retention Time min | Area mAU*min | Height mAU | Relative Area % | Relative Height % | Amount |
| 1                   |           | 8.095              | 302.514      | 776.237    | 90.55           | 90.68             | n.a.   |
| 2                   |           | 9.265              | 31.563       | 79.807     | 9.45            | 9.32              | n.a.   |
| Total:              |           |                    | 334.077      | 856.044    | 100.00          | 100.00            |        |

Compound **2m**: HPLC (IA, *n*-hexane/2-propanol = 70/30,  $v = 1.0$  mL/min,  $\lambda = 254$  nm)

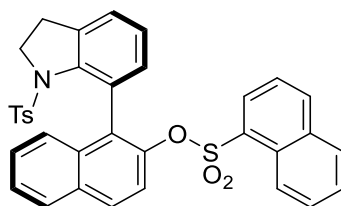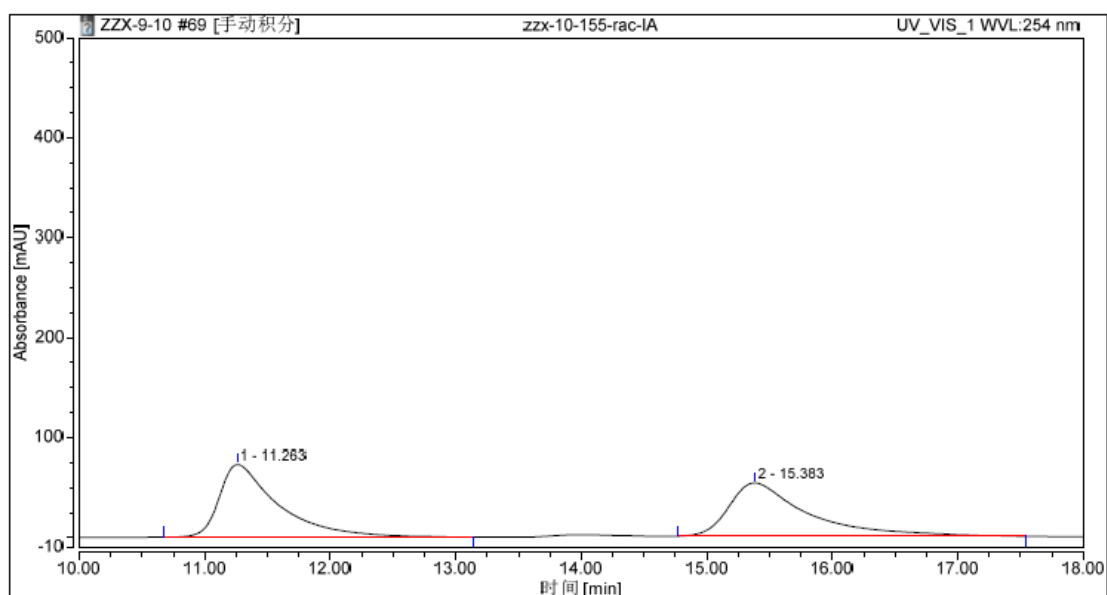

| Integration Results |           |                    |              |            |                 |                   |        |
|---------------------|-----------|--------------------|--------------|------------|-----------------|-------------------|--------|
| No.                 | Peak Name | Retention Time min | Area mAU*min | Height mAU | Relative Area % | Relative Height % | Amount |
| 1                   |           | 11.263             | 39.434       | 72.711     | 50.55           | 57.71             | n.a.   |
| 2                   |           | 15.383             | 38.583       | 53.286     | 49.45           | 42.29             | n.a.   |
| Total:              |           |                    | 78.017       | 125.996    | 100.00          | 100.00            |        |

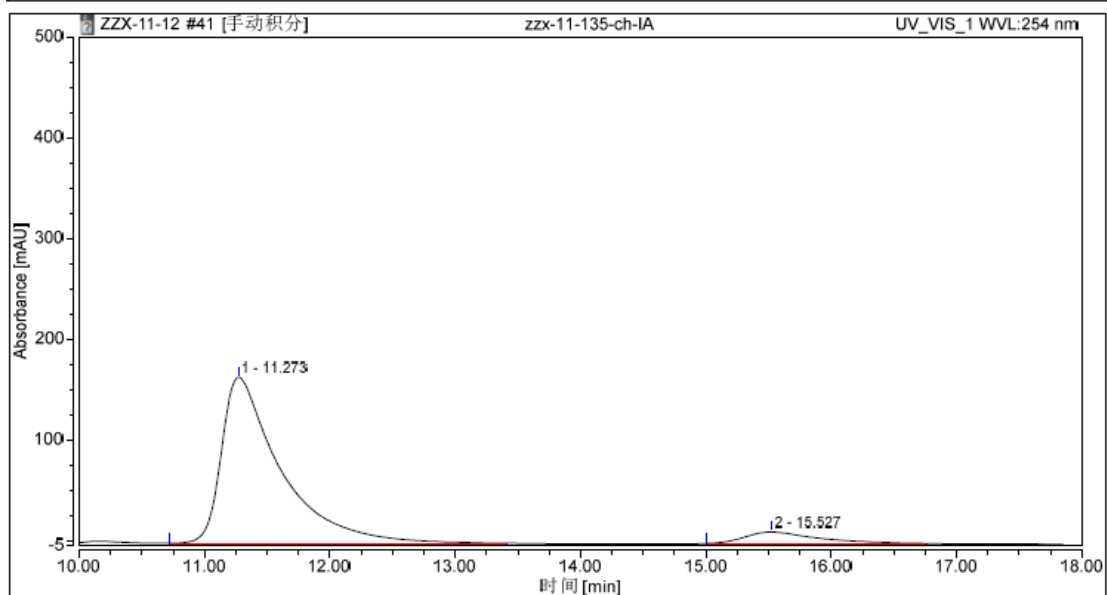

| Integration Results |           |                    |              |            |                 |                   |        |
|---------------------|-----------|--------------------|--------------|------------|-----------------|-------------------|--------|
| No.                 | Peak Name | Retention Time min | Area mAU*min | Height mAU | Relative Area % | Relative Height % | Amount |
| 1                   |           | 11.273             | 89.899       | 164.881    | 92.28           | 93.56             | n.a.   |
| 2                   |           | 15.527             | 7.516        | 11.345     | 7.72            | 6.44              | n.a.   |
| Total:              |           |                    | 97.415       | 176.226    | 100.00          | 100.00            |        |

Compound **2n**: HPLC (IA, *n*-hexane/2-propanol = 80/20,  $v = 1.0$  mL/min,  $\lambda = 254$  nm)

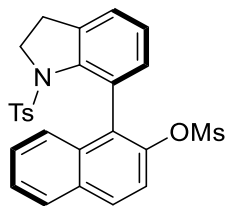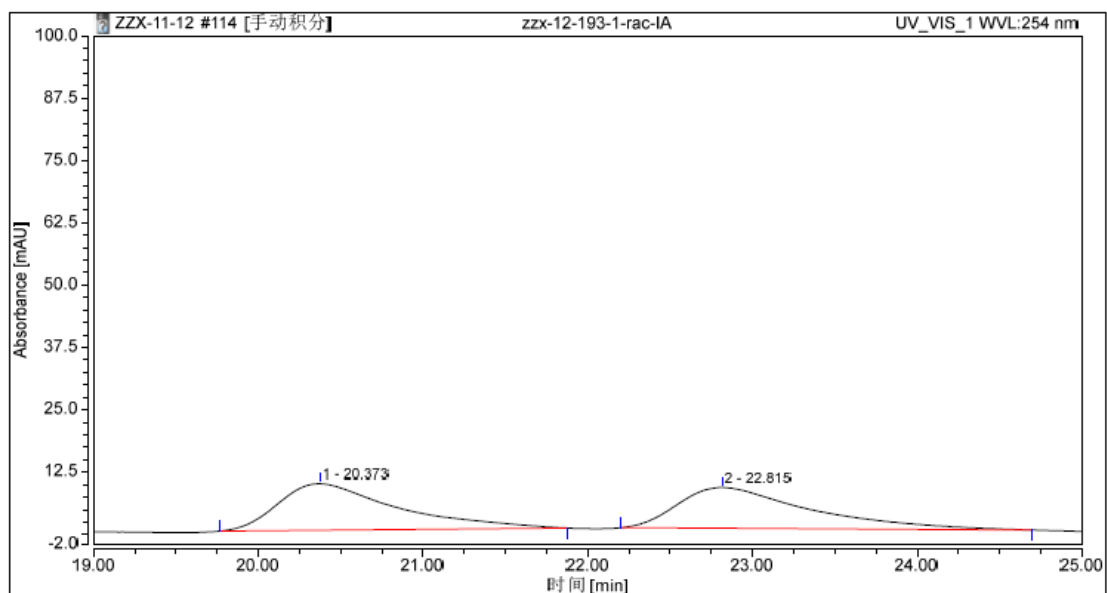

| Integration Results |           |                    |              |            |                 |                   |        |
|---------------------|-----------|--------------------|--------------|------------|-----------------|-------------------|--------|
| No.                 | Peak Name | Retention Time min | Area mAU*min | Height mAU | Relative Area % | Relative Height % | Amount |
| 1                   |           | 20.373             | 7.736        | 9.316      | 50.69           | 53.27             | n.a.   |
| 2                   |           | 22.815             | 7.525        | 8.173      | 49.31           | 46.73             | n.a.   |
| Total:              |           |                    | 15.261       | 17.489     | 100.00          | 100.00            |        |

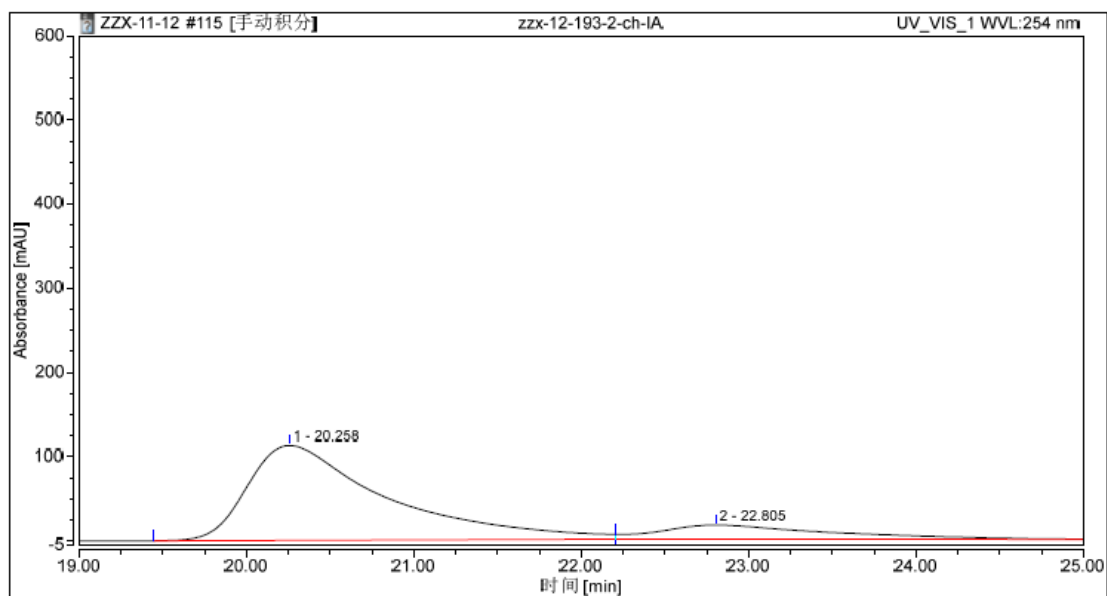

| Integration Results |           |                    |              |            |                 |                   |        |
|---------------------|-----------|--------------------|--------------|------------|-----------------|-------------------|--------|
| No.                 | Peak Name | Retention Time min | Area mAU*min | Height mAU | Relative Area % | Relative Height % | Amount |
| 1                   |           | 20.258             | 107.744      | 112.660    | 84.17           | 86.97             | n.a.   |
| 2                   |           | 22.805             | 20.259       | 16.874     | 15.83           | 13.03             | n.a.   |
| Total:              |           |                    | 128.003      | 129.534    | 100.00          | 100.00            |        |

Compound **2o**: HPLC (ODH, *n*-hexane/2-propanol = 70/30,  $v = 1.0$  mL/min,  $\lambda = 254$  nm)

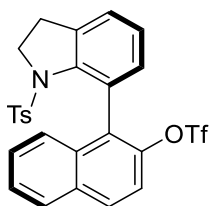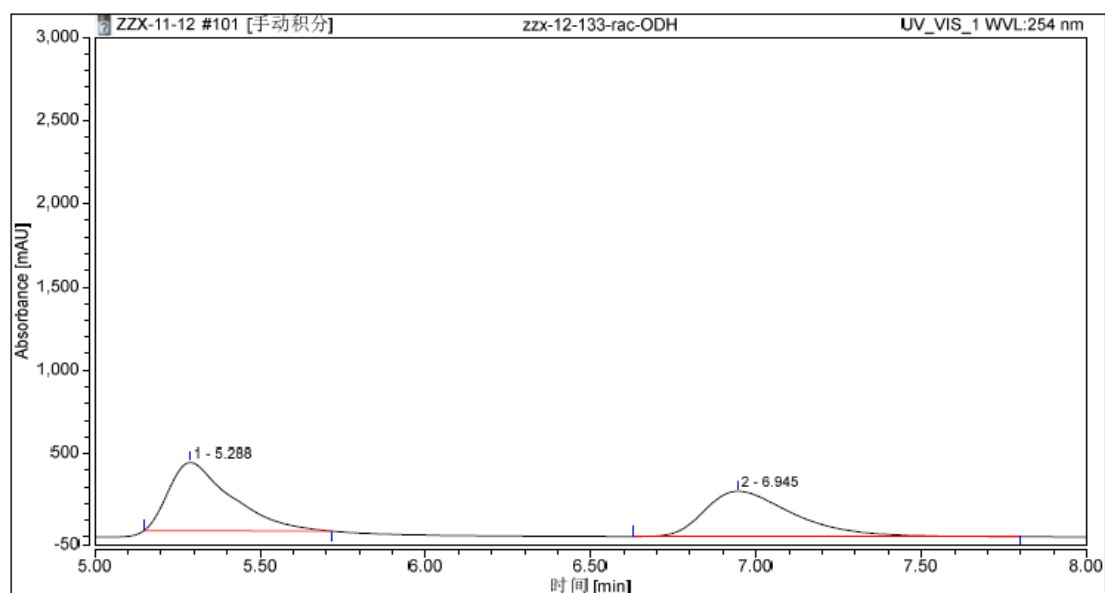

| Integration Results |           |                    |              |            |                 |                   |        |
|---------------------|-----------|--------------------|--------------|------------|-----------------|-------------------|--------|
| No.                 | Peak Name | Retention Time min | Area mAU*min | Height mAU | Relative Area % | Relative Height % | Amount |
| 1                   |           | 5.288              | 89.850       | 410.000    | 51.32           | 60.05             | n.a.   |
| 2                   |           | 6.945              | 85.214       | 272.723    | 48.68           | 39.95             | n.a.   |
| Total:              |           |                    | 175.063      | 682.724    | 100.00          | 100.00            |        |

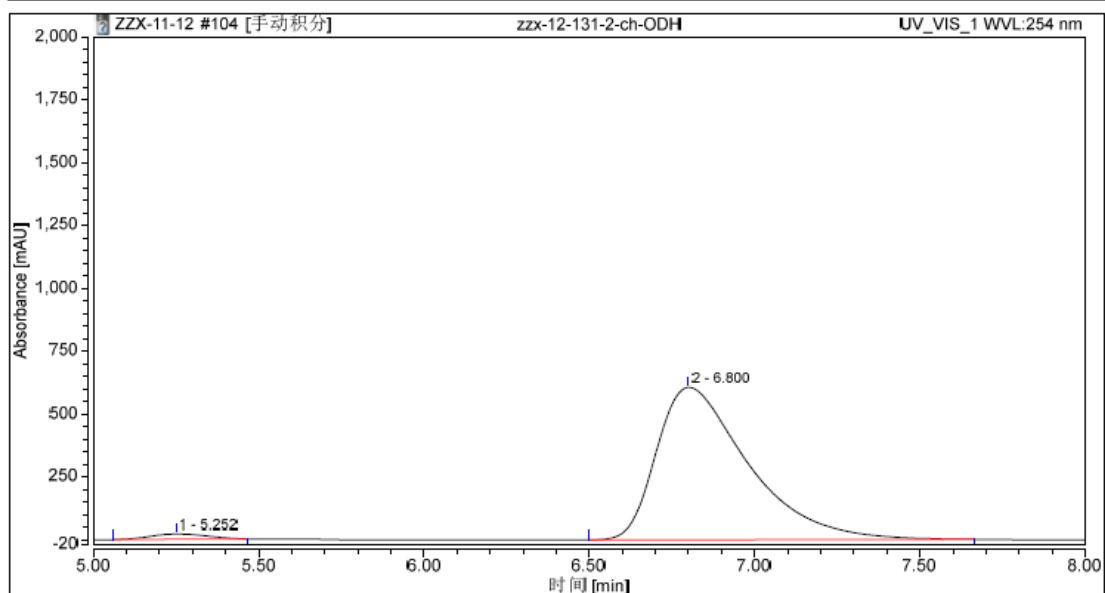

| Integration Results |           |                    |              |            |                 |                   |        |
|---------------------|-----------|--------------------|--------------|------------|-----------------|-------------------|--------|
| No.                 | Peak Name | Retention Time min | Area mAU*min | Height mAU | Relative Area % | Relative Height % | Amount |
| 1                   |           | 5.252              | 4.207        | 21.151     | 2.11            | 3.37              | n.a.   |
| 2                   |           | 6.800              | 194.736      | 606.247    | 97.89           | 96.63             | n.a.   |
| Total:              |           |                    | 198.943      | 627.399    | 100.00          | 100.00            |        |

Compound **2p**: HPLC (ADH, *n*-hexane/2-propanol = 70/30,  $v = 1.0$  mL/min,  $\lambda = 254$  nm)

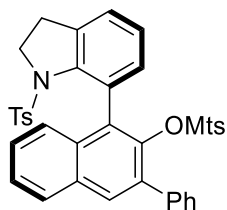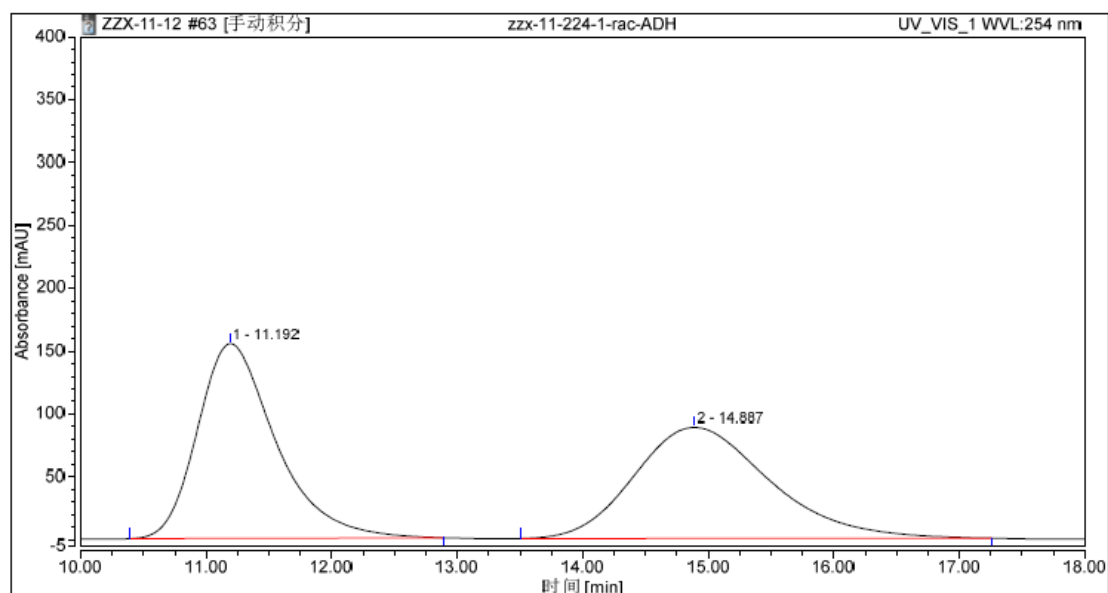

| Integration Results |           |                    |              |            |                 |                   |        |
|---------------------|-----------|--------------------|--------------|------------|-----------------|-------------------|--------|
| No.                 | Peak Name | Retention Time min | Area mAU*min | Height mAU | Relative Area % | Relative Height % | Amount |
| 1                   |           | 11.192             | 112.231      | 154.972    | 50.37           | 63.72             | n.a.   |
| 2                   |           | 14.887             | 110.581      | 88.241     | 49.63           | 36.28             | n.a.   |
| Total:              |           |                    | 222.813      | 243.213    | 100.00          | 100.00            |        |

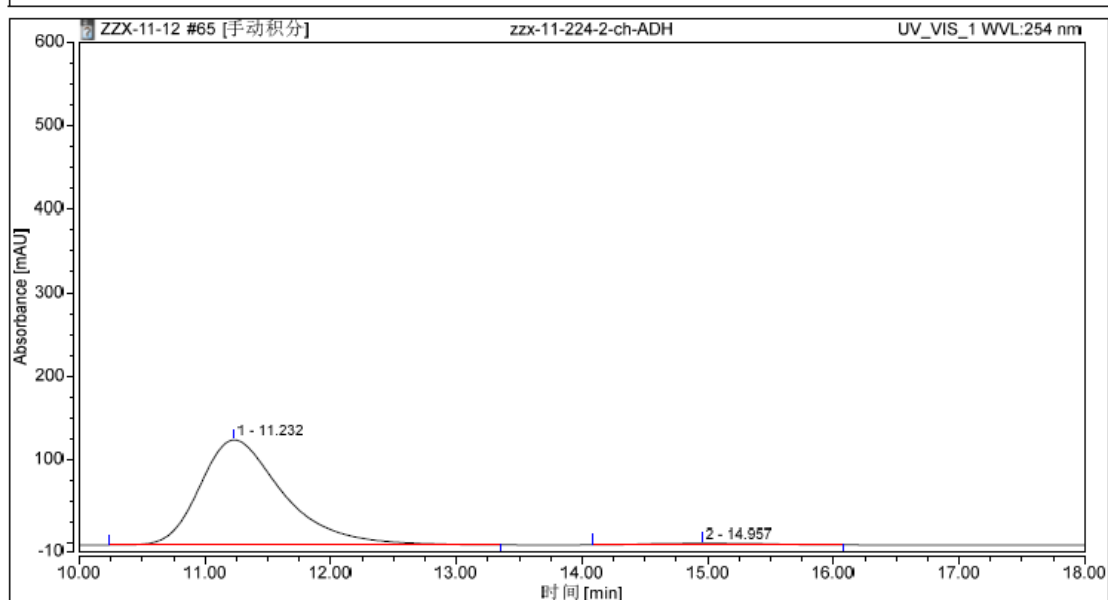

| Integration Results |           |                    |              |            |                 |                   |        |
|---------------------|-----------|--------------------|--------------|------------|-----------------|-------------------|--------|
| No.                 | Peak Name | Retention Time min | Area mAU*min | Height mAU | Relative Area % | Relative Height % | Amount |
| 1                   |           | 11.232             | 96.651       | 125.603    | 98.00           | 98.53             | n.a.   |
| 2                   |           | 14.957             | 1.971        | 1.868      | 2.00            | 1.47              | n.a.   |
| Total:              |           |                    | 98.622       | 127.471    | 100.00          | 100.00            |        |



Compound **2q**: HPLC (IA, *n*-hexane/2-propanol = 70/30,  $v = 1.0$  mL/min,  $\lambda = 254$  nm)

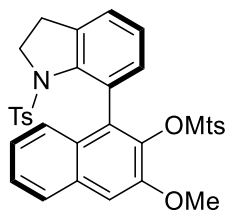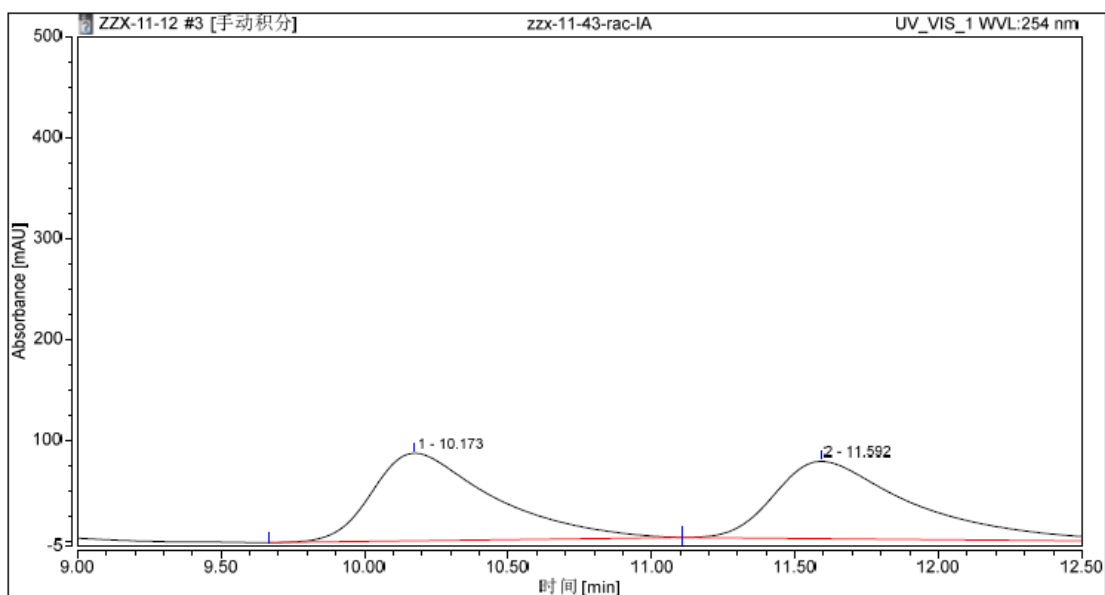

| Integration Results |           |                    |              |            |                 |                   |        |
|---------------------|-----------|--------------------|--------------|------------|-----------------|-------------------|--------|
| No.                 | Peak Name | Retention Time min | Area mAU*min | Height mAU | Relative Area % | Relative Height % | Amount |
| 1                   |           | 10.173             | 42.256       | 86.755     | 49.71           | 53.12             | n.a.   |
| 2                   |           | 11.592             | 42.740       | 76.575     | 50.29           | 46.88             | n.a.   |
| Total:              |           |                    | 84.996       | 163.330    | 100.00          | 100.00            |        |

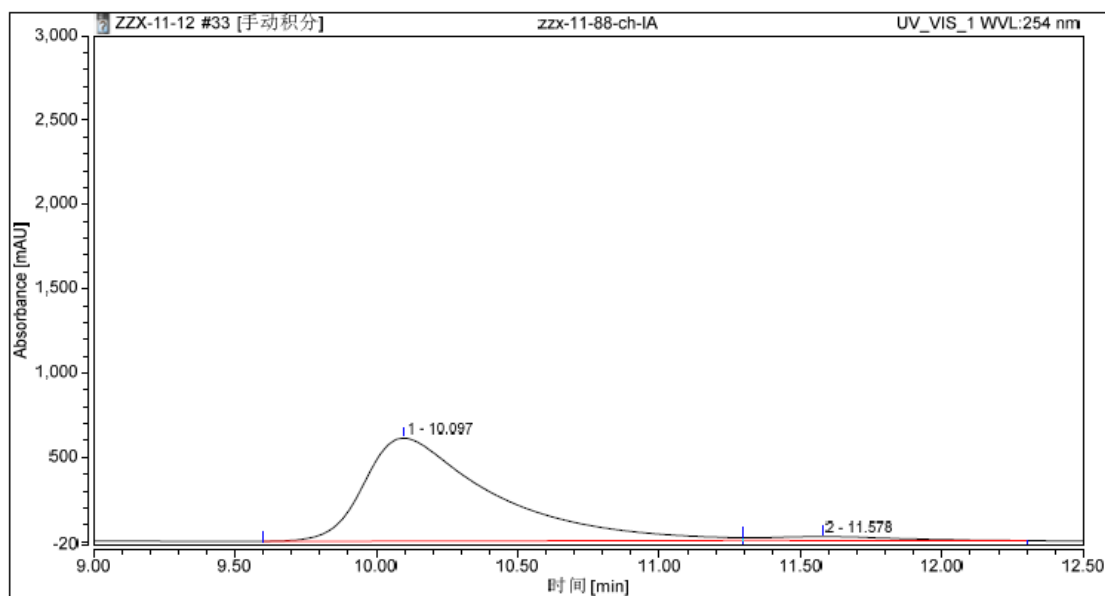

| Integration Results |           |                    |              |            |                 |                   |        |
|---------------------|-----------|--------------------|--------------|------------|-----------------|-------------------|--------|
| No.                 | Peak Name | Retention Time min | Area mAU*min | Height mAU | Relative Area % | Relative Height % | Amount |
| 1                   |           | 10.097             | 321.863      | 610.472    | 96.27           | 96.33             | n.a.   |
| 2                   |           | 11.578             | 12.459       | 23.225     | 3.73            | 3.67              | n.a.   |
| Total:              |           |                    | 334.322      | 633.698    | 100.00          | 100.00            |        |

Compound **2r**: HPLC (IA, *n*-hexane/2-propanol = 85/15,  $v = 1.0$  mL/min,  $\lambda = 254$  nm)

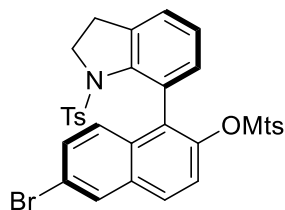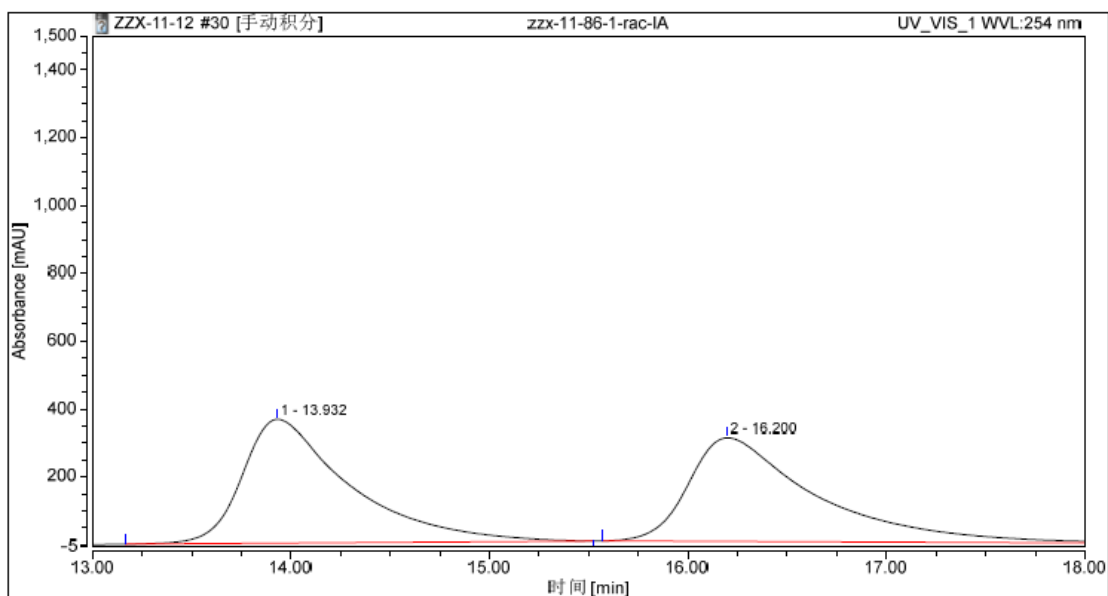

| Integration Results |           |                    |              |            |                 |                   |        |
|---------------------|-----------|--------------------|--------------|------------|-----------------|-------------------|--------|
| No.                 | Peak Name | Retention Time min | Area mAU*min | Height mAU | Relative Area % | Relative Height % | Amount |
| 1                   |           | 13.932             | 228.839      | 365.134    | 50.29           | 54.46             | n.a.   |
| 2                   |           | 16.200             | 226.176      | 305.387    | 49.71           | 45.54             | n.a.   |
| Total:              |           |                    | 455.015      | 670.522    | 100.00          | 100.00            |        |

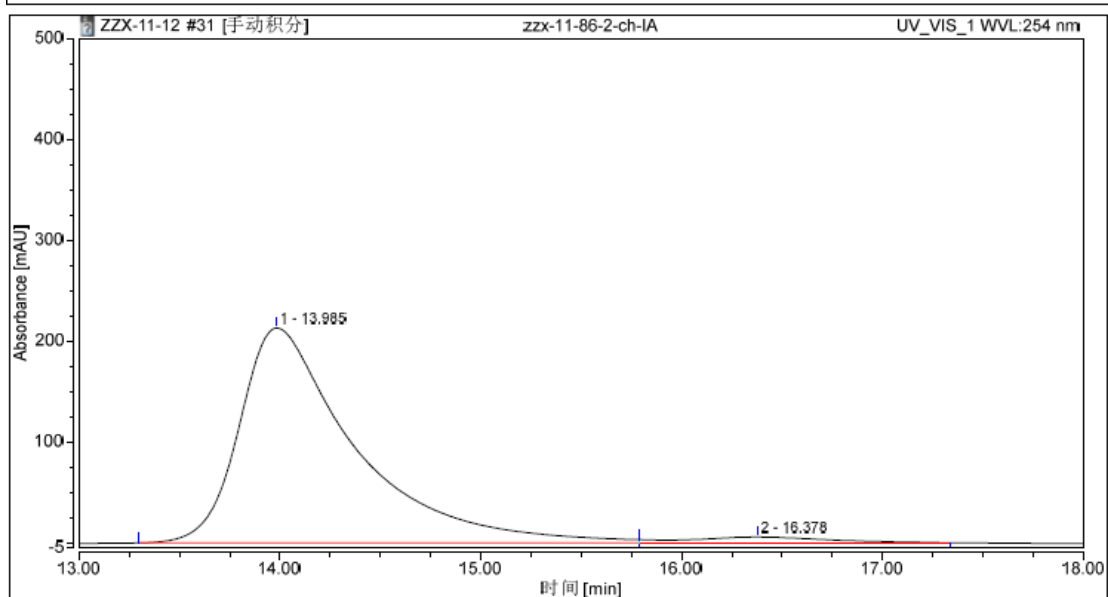

| Integration Results |           |                    |              |            |                 |                   |        |
|---------------------|-----------|--------------------|--------------|------------|-----------------|-------------------|--------|
| No.                 | Peak Name | Retention Time min | Area mAU*min | Height mAU | Relative Area % | Relative Height % | Amount |
| 1                   |           | 13.985             | 141.851      | 213.069    | 96.90           | 97.36             | n.a.   |
| 2                   |           | 16.378             | 4.540        | 5.774      | 3.10            | 2.64              | n.a.   |
| Total:              |           |                    | 146.391      | 218.843    | 100.00          | 100.00            |        |

Compound **2s**: HPLC (IA, *n*-hexane/2-propanol = 70/30,  $v = 1.0$  mL/min,  $\lambda = 254$  nm)

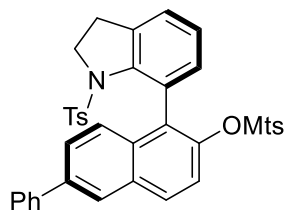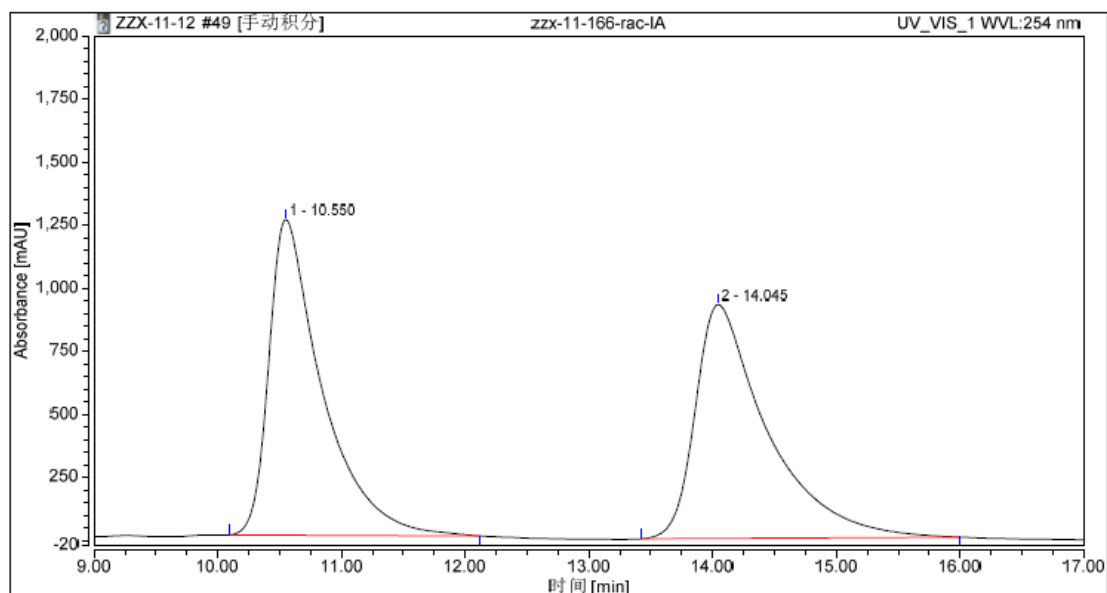

| Integration Results |           |                    |              |            |                 |                   |        |
|---------------------|-----------|--------------------|--------------|------------|-----------------|-------------------|--------|
| No.                 | Peak Name | Retention Time min | Area mAU*min | Height mAU | Relative Area % | Relative Height % | Amount |
| 1                   |           | 10.550             | 623.340      | 1251.600   | 49.93           | 57.46             | n.a.   |
| 2                   |           | 14.045             | 624.981      | 926.676    | 50.07           | 42.54             | n.a.   |
| Total:              |           |                    | 1248.321     | 2178.276   | 100.00          | 100.00            |        |

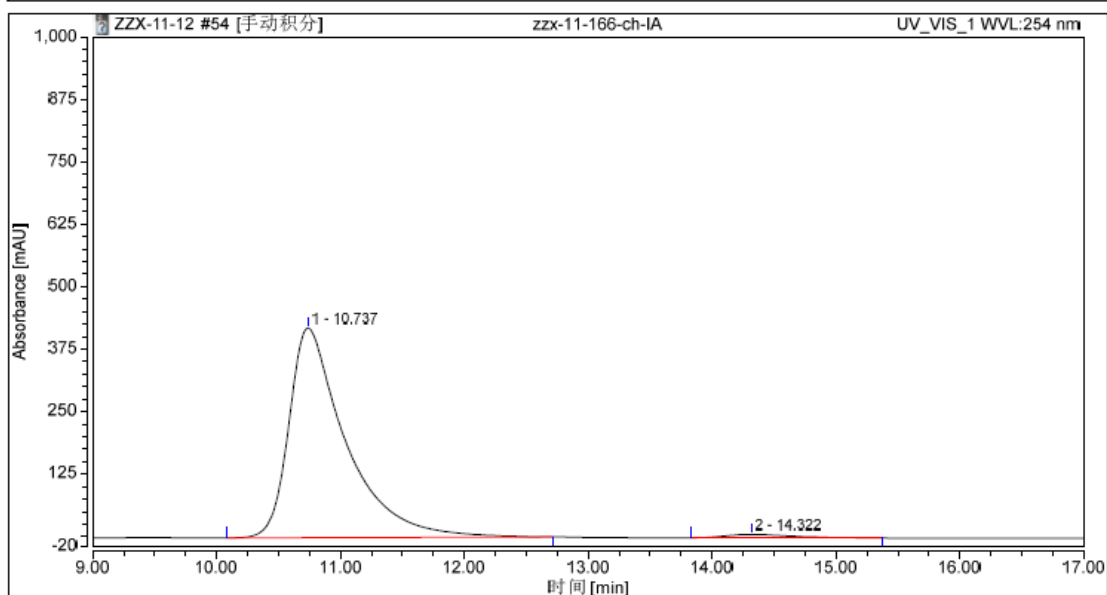

| Integration Results |           |                    |              |            |                 |                   |        |
|---------------------|-----------|--------------------|--------------|------------|-----------------|-------------------|--------|
| No.                 | Peak Name | Retention Time min | Area mAU*min | Height mAU | Relative Area % | Relative Height % | Amount |
| 1                   |           | 10.737             | 223.420      | 419.832    | 97.99           | 98.27             | n.a.   |
| 2                   |           | 14.322             | 4.574        | 7.378      | 2.01            | 1.73              | n.a.   |
| Total:              |           |                    | 227.994      | 427.211    | 100.00          | 100.00            |        |

Compound **2t**: HPLC (IA, *n*-hexane/2-propanol = 70/30,  $v = 1.0$  mL/min,  $\lambda = 254$  nm)

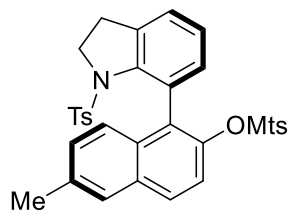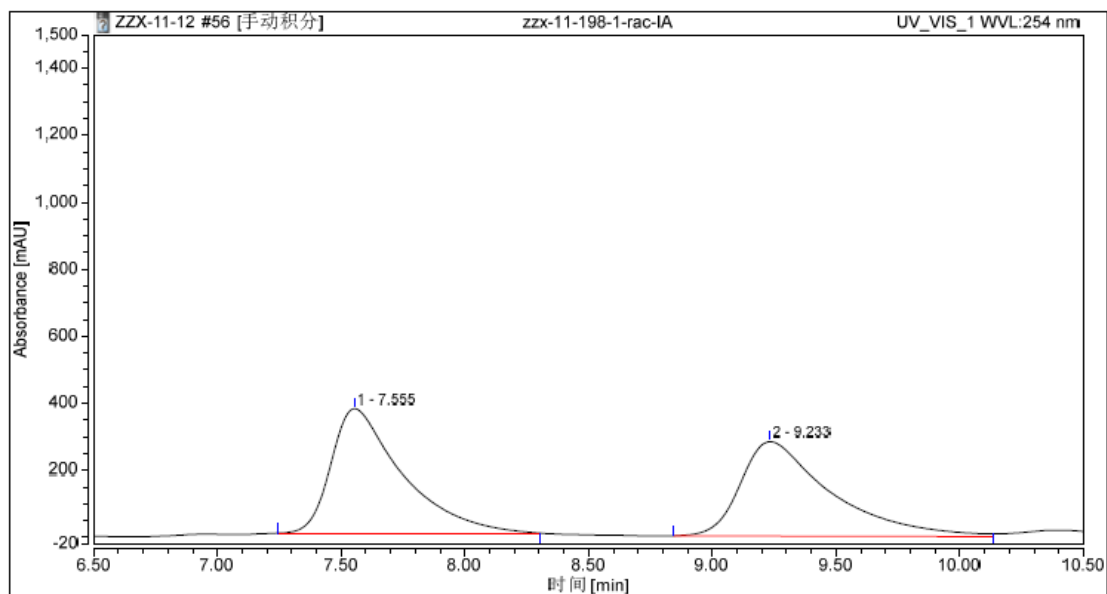

| Integration Results |           |                    |              |            |                 |                   |        |
|---------------------|-----------|--------------------|--------------|------------|-----------------|-------------------|--------|
| No.                 | Peak Name | Retention Time min | Area mAU*min | Height mAU | Relative Area % | Relative Height % | Amount |
| 1                   |           | 7.555              | 123.428      | 371.442    | 50.95           | 56.88             | n.a.   |
| 2                   |           | 9.233              | 118.845      | 281.585    | 49.05           | 43.12             | n.a.   |
| Total:              |           |                    | 242.273      | 653.027    | 100.00          | 100.00            |        |

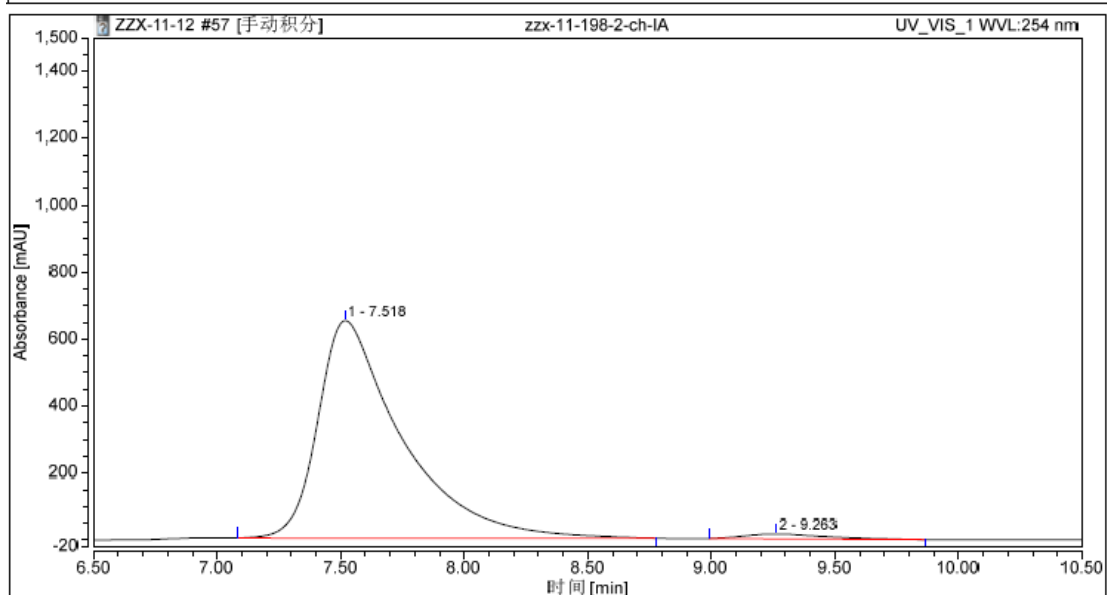

| Integration Results |           |                    |              |            |                 |                   |        |
|---------------------|-----------|--------------------|--------------|------------|-----------------|-------------------|--------|
| No.                 | Peak Name | Retention Time min | Area mAU*min | Height mAU | Relative Area % | Relative Height % | Amount |
| 1                   |           | 7.518              | 255.496      | 649.125    | 97.91           | 97.80             | n.a.   |
| 2                   |           | 9.263              | 5.442        | 14.625     | 2.09            | 2.20              | n.a.   |
| Total:              |           |                    | 260.938      | 663.749    | 100.00          | 100.00            |        |

Compound **2u**: HPLC (ODH, *n*-hexane/2-propanol = 70/30,  $v = 1.0$  mL/min,  $\lambda = 254$  nm)

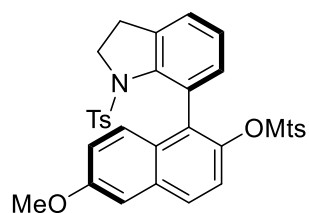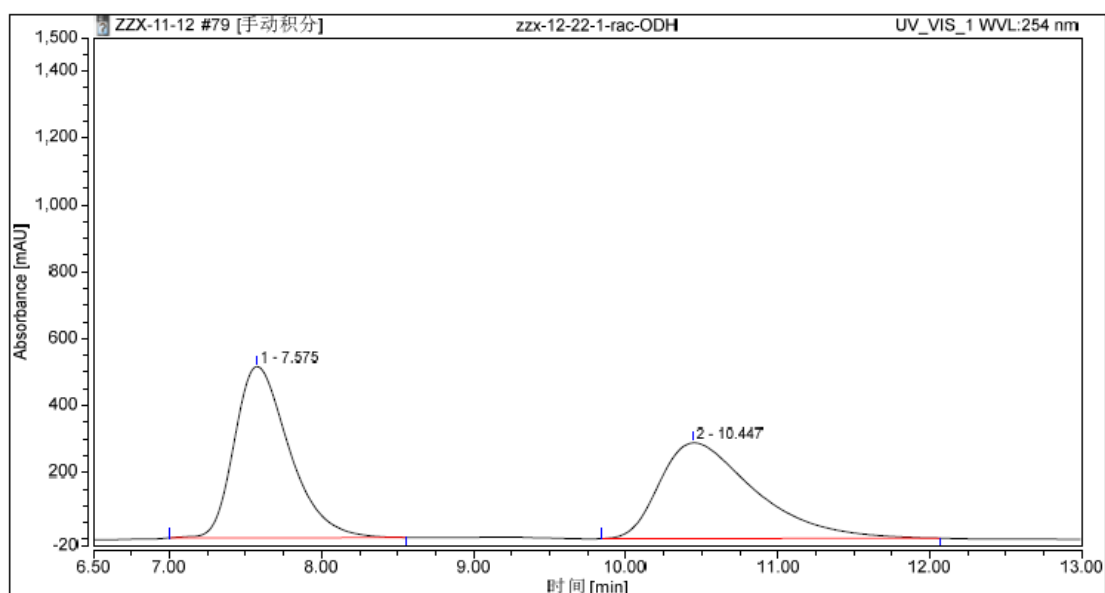

| Integration Results |           |                    |              |            |                 |                   |        |
|---------------------|-----------|--------------------|--------------|------------|-----------------|-------------------|--------|
| No.                 | Peak Name | Retention Time min | Area mAU*min | Height mAU | Relative Area % | Relative Height % | Amount |
| 1                   |           | 7.575              | 214.103      | 511.928    | 50.71           | 64.14             | n.a.   |
| 2                   |           | 10.447             | 208.082      | 286.260    | 49.29           | 35.86             | n.a.   |
| Total:              |           |                    | 422.185      | 798.187    | 100.00          | 100.00            |        |

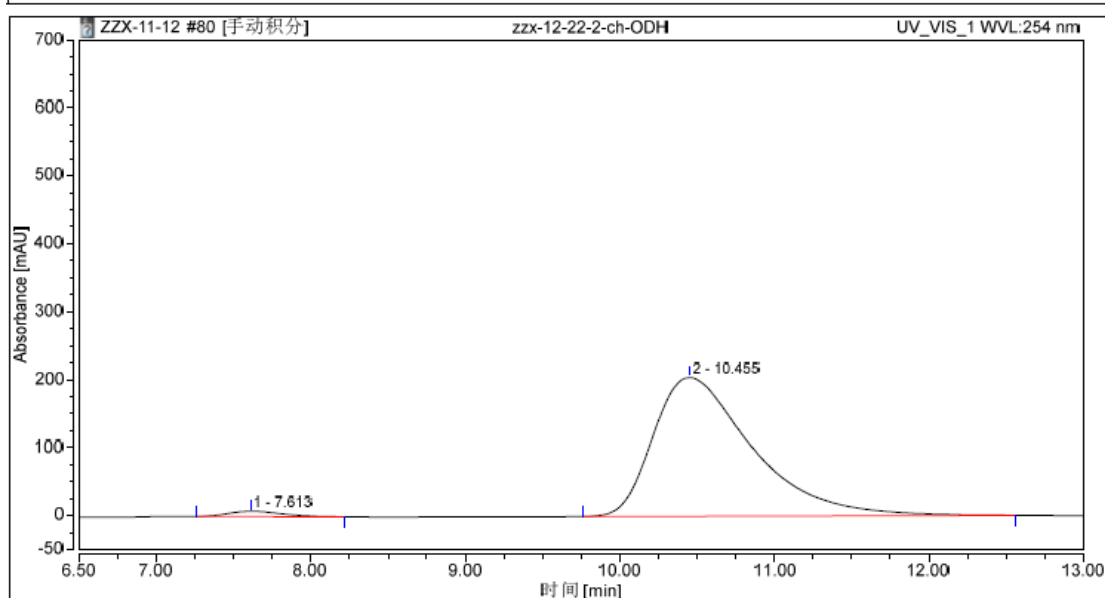

| Integration Results |           |                    |              |            |                 |                   |        |
|---------------------|-----------|--------------------|--------------|------------|-----------------|-------------------|--------|
| No.                 | Peak Name | Retention Time min | Area mAU*min | Height mAU | Relative Area % | Relative Height % | Amount |
| 1                   |           | 7.613              | 3.155        | 7.910      | 2.04            | 3.73              | n.a.   |
| 2                   |           | 10.455             | 151.692      | 203.956    | 97.96           | 96.27             | n.a.   |
| Total:              |           |                    | 154.847      | 211.866    | 100.00          | 100.00            |        |

Compound **2v**: HPLC (ADH, *n*-hexane/2-propanol = 70/30,  $v = 1.0$  mL/min,  $\lambda = 254$  nm)

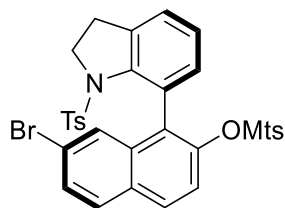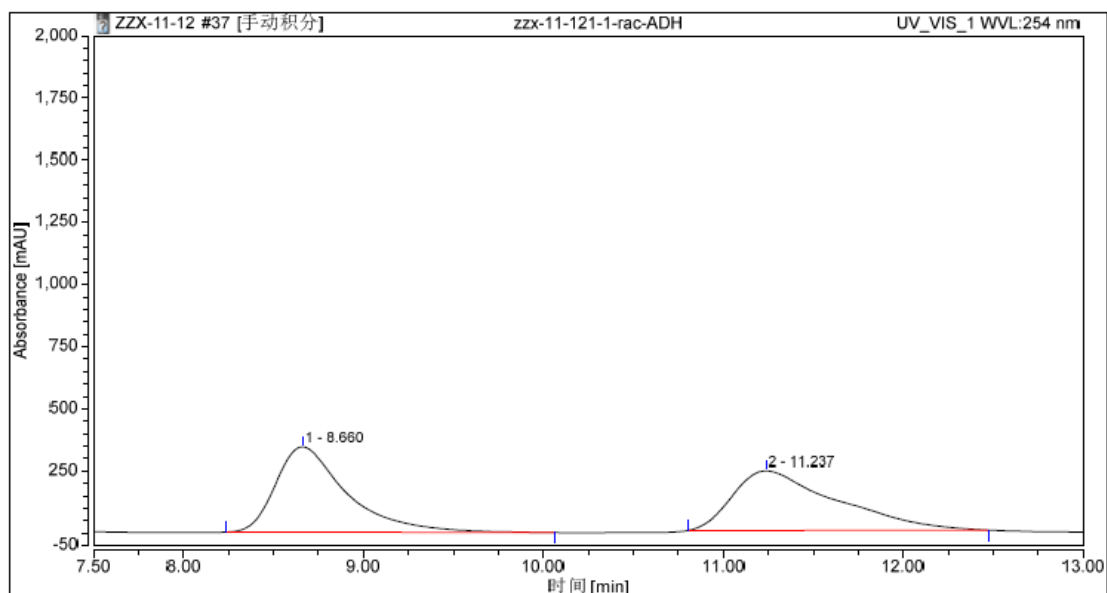

| Integration Results |           |                    |              |            |                 |                   |        |
|---------------------|-----------|--------------------|--------------|------------|-----------------|-------------------|--------|
| No.                 | Peak Name | Retention Time min | Area mAU*min | Height mAU | Relative Area % | Relative Height % | Amount |
| 1                   |           | 8.660              | 157.016      | 343.273    | 49.63           | 58.92             | n.a.   |
| 2                   |           | 11.237             | 159.386      | 239.294    | 50.37           | 41.08             | n.a.   |
| Total:              |           |                    | 316.402      | 582.567    | 100.00          | 100.00            |        |

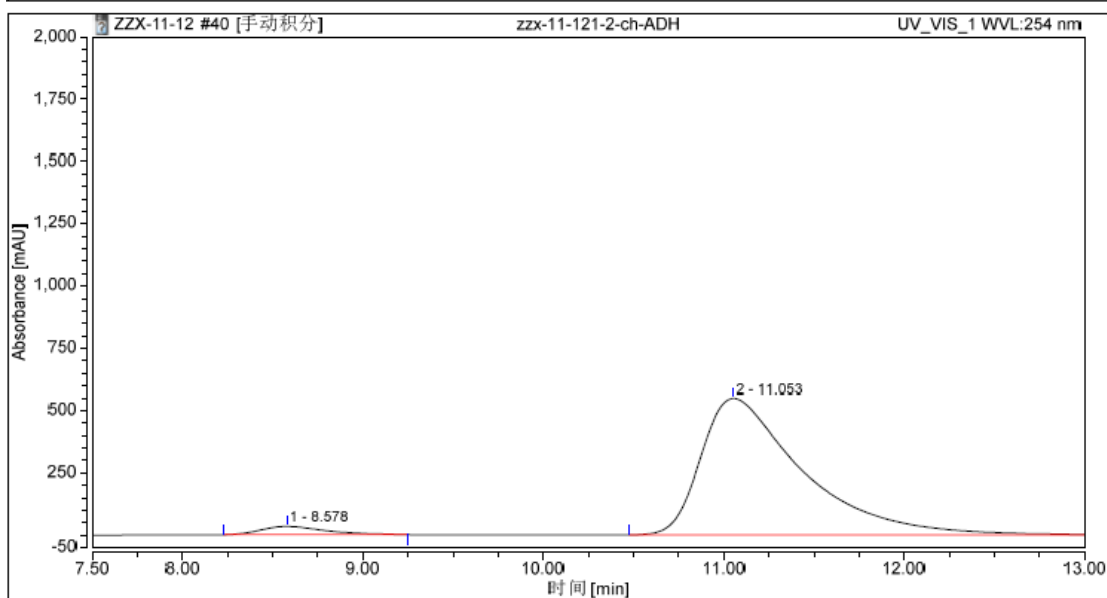

| Integration Results |           |                    |              |            |                 |                   |        |
|---------------------|-----------|--------------------|--------------|------------|-----------------|-------------------|--------|
| No.                 | Peak Name | Retention Time min | Area mAU*min | Height mAU | Relative Area % | Relative Height % | Amount |
| 1                   |           | 8.578              | 13.500       | 33.351     | 3.65            | 5.75              | n.a.   |
| 2                   |           | 11.053             | 356.243      | 547.151    | 96.35           | 94.25             | n.a.   |
| Total:              |           |                    | 369.743      | 580.502    | 100.00          | 100.00            |        |

Compound **2w**: HPLC (ADH, *n*-hexane/2-propanol = 85/15,  $v = 1.0$  mL/min,  $\lambda = 254$  nm)

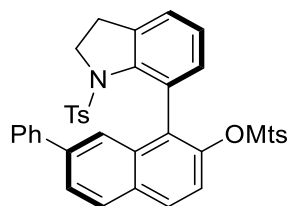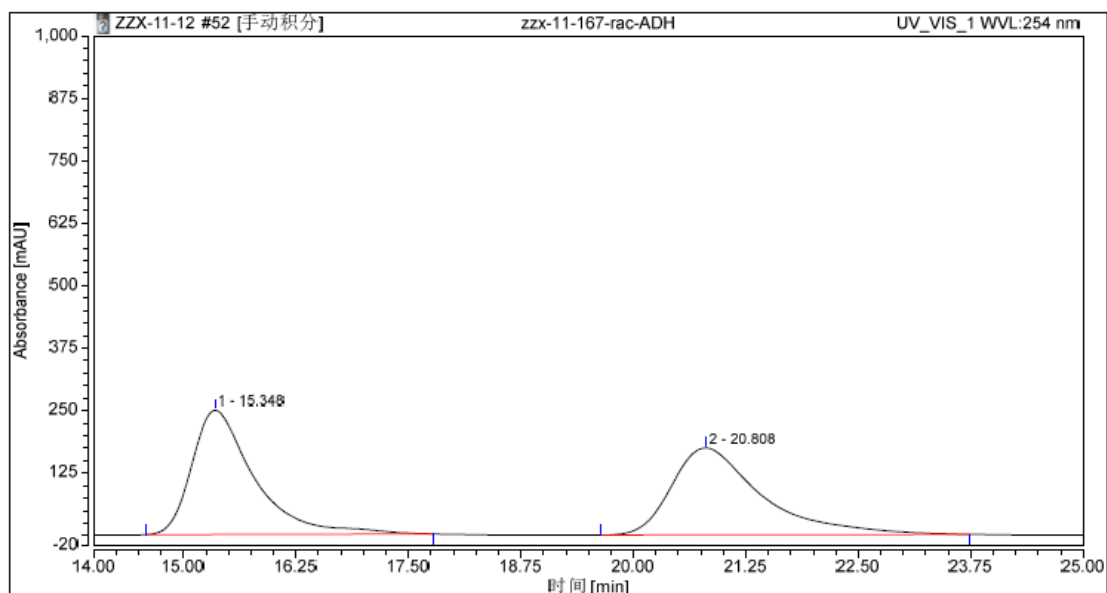

| Integration Results |           |                    |              |            |                 |                   |        |
|---------------------|-----------|--------------------|--------------|------------|-----------------|-------------------|--------|
| No.                 | Peak Name | Retention Time min | Area mAU*min | Height mAU | Relative Area % | Relative Height % | Amount |
| 1                   |           | 15.348             | 200.295      | 248.373    | 49.91           | 58.82             | n.a.   |
| 2                   |           | 20.808             | 201.038      | 173.859    | 50.09           | 41.18             | n.a.   |
| Total:              |           |                    | 401.333      | 422.232    | 100.00          | 100.00            |        |

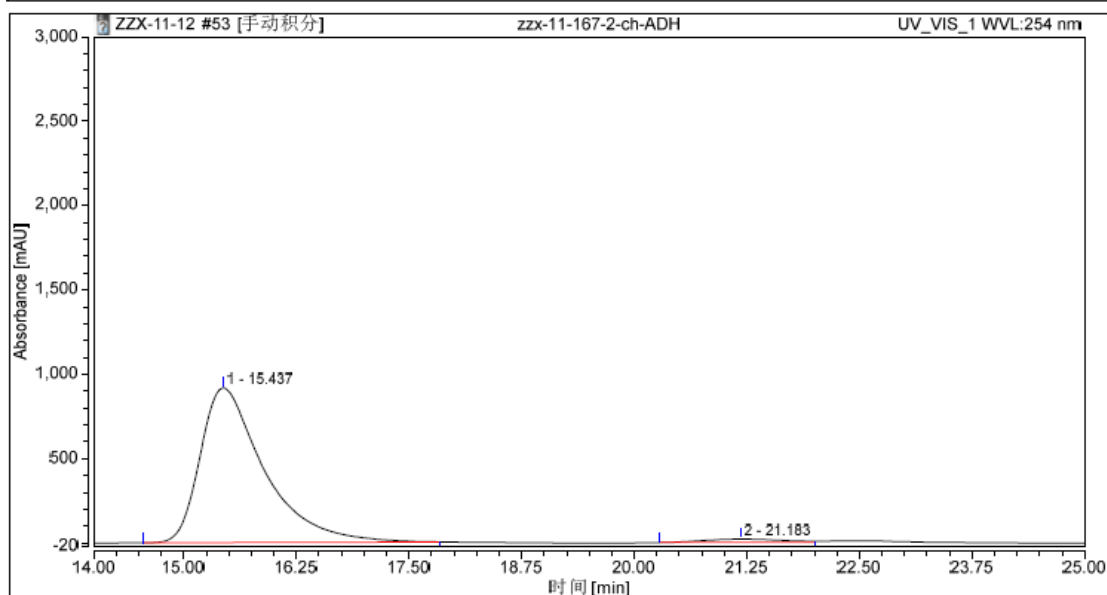

| Integration Results |           |                    |              |            |                 |                   |        |
|---------------------|-----------|--------------------|--------------|------------|-----------------|-------------------|--------|
| No.                 | Peak Name | Retention Time min | Area mAU*min | Height mAU | Relative Area % | Relative Height % | Amount |
| 1                   |           | 15.437             | 753.125      | 916.333    | 97.37           | 97.84             | n.a.   |
| 2                   |           | 21.183             | 20.329       | 20.258     | 2.63            | 2.16              | n.a.   |
| Total:              |           |                    | 773.454      | 936.592    | 100.00          | 100.00            |        |

Compound **2x**: HPLC (ODH, *n*-hexane/2-propanol = 85/15,  $v = 1.0$  mL/min,  $\lambda = 254$  nm)

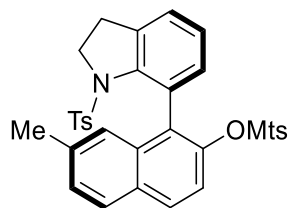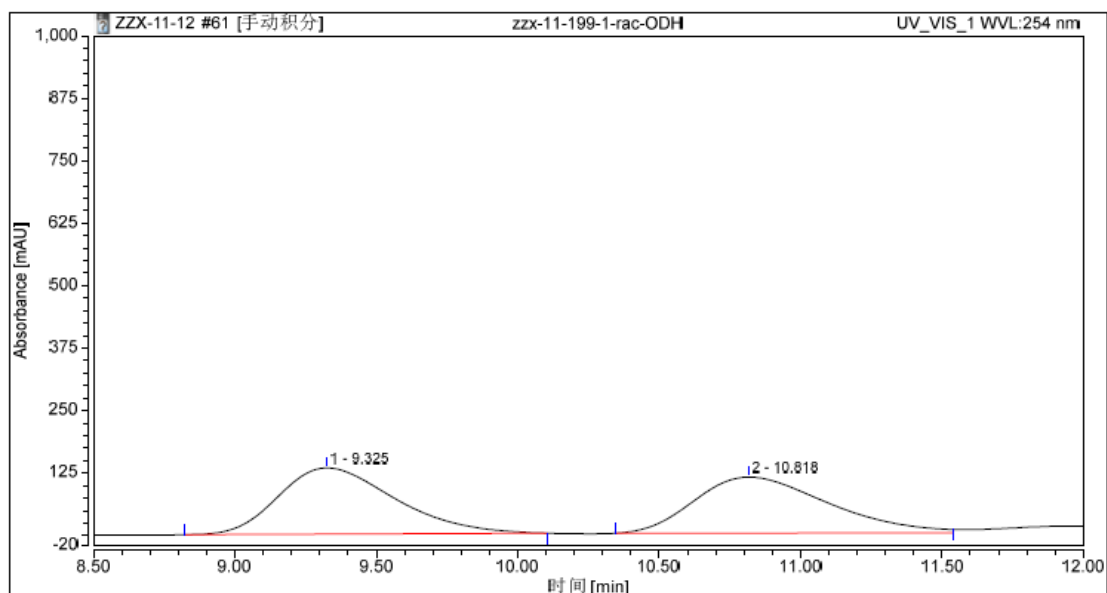

| Integration Results |           |                    |              |            |                 |                   |        |
|---------------------|-----------|--------------------|--------------|------------|-----------------|-------------------|--------|
| No.                 | Peak Name | Retention Time min | Area mAU*min | Height mAU | Relative Area % | Relative Height % | Amount |
| 1                   |           | 9.325              | 63.219       | 132.386    | 50.67           | 54.13             | n.a.   |
| 2                   |           | 10.818             | 61.558       | 112.163    | 49.33           | 45.87             | n.a.   |
| Total:              |           |                    | 124.777      | 244.548    | 100.00          | 100.00            |        |

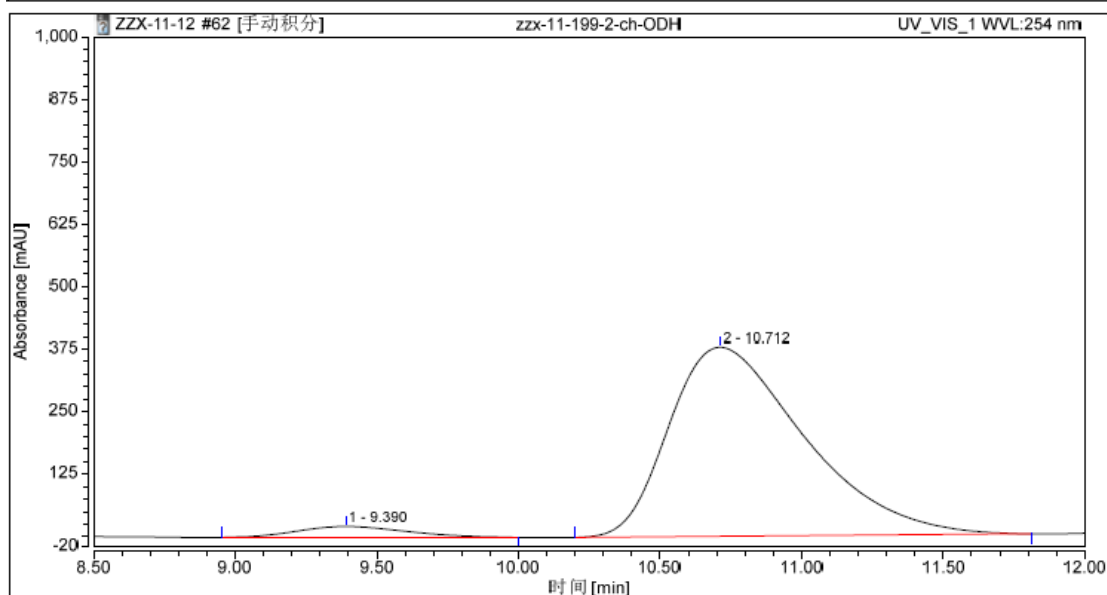

| Integration Results |           |                    |              |            |                 |                   |        |
|---------------------|-----------|--------------------|--------------|------------|-----------------|-------------------|--------|
| No.                 | Peak Name | Retention Time min | Area mAU*min | Height mAU | Relative Area % | Relative Height % | Amount |
| 1                   |           | 9.390              | 9.808        | 21.847     | 4.47            | 5.46              | n.a.   |
| 2                   |           | 10.712             | 209.579      | 378.454    | 95.53           | 94.54             | n.a.   |
| Total:              |           |                    | 219.386      | 400.300    | 100.00          | 100.00            |        |



Compound **2y**: HPLC (ODH, *n*-hexane/2-propanol = 85/15,  $v = 1.0$  mL/min,  $\lambda = 254$  nm)

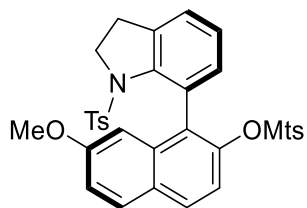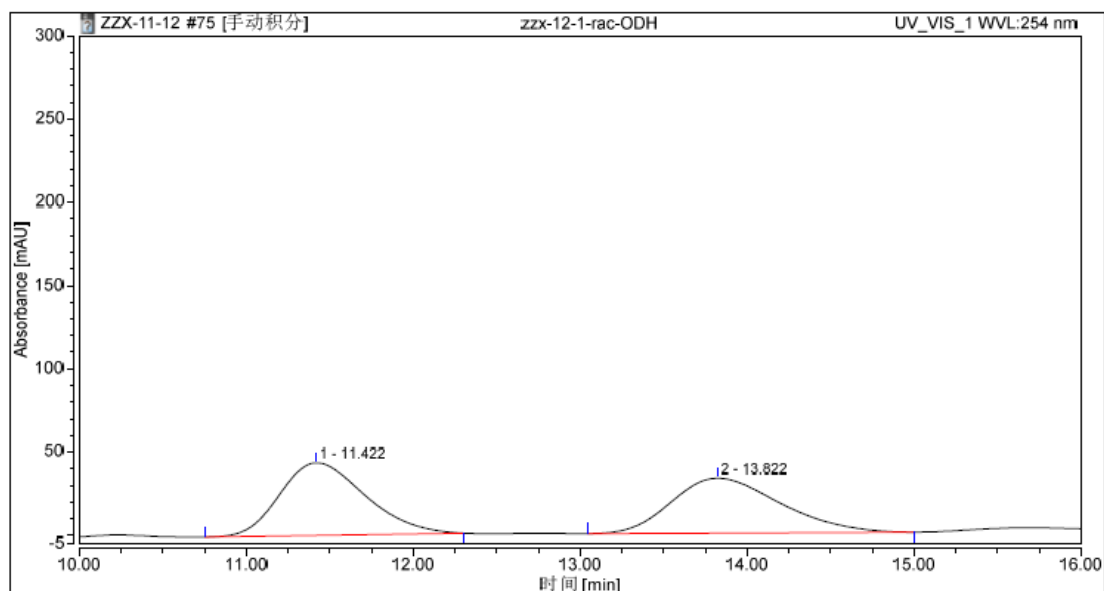

| Integration Results |           |                    |              |            |                 |                   |             |
|---------------------|-----------|--------------------|--------------|------------|-----------------|-------------------|-------------|
| No.                 | Peak Name | Retention Time min | Area mAU*min | Height mAU | Relative Area % | Relative Height % | Amount n.a. |
| 1                   |           | 11.422             | 25.789       | 43.522     | 50.98           | 56.96             | n.a.        |
| 2                   |           | 13.822             | 24.795       | 32.888     | 49.02           | 43.04             | n.a.        |
| Total:              |           |                    | 50.584       | 76.410     | 100.00          | 100.00            |             |

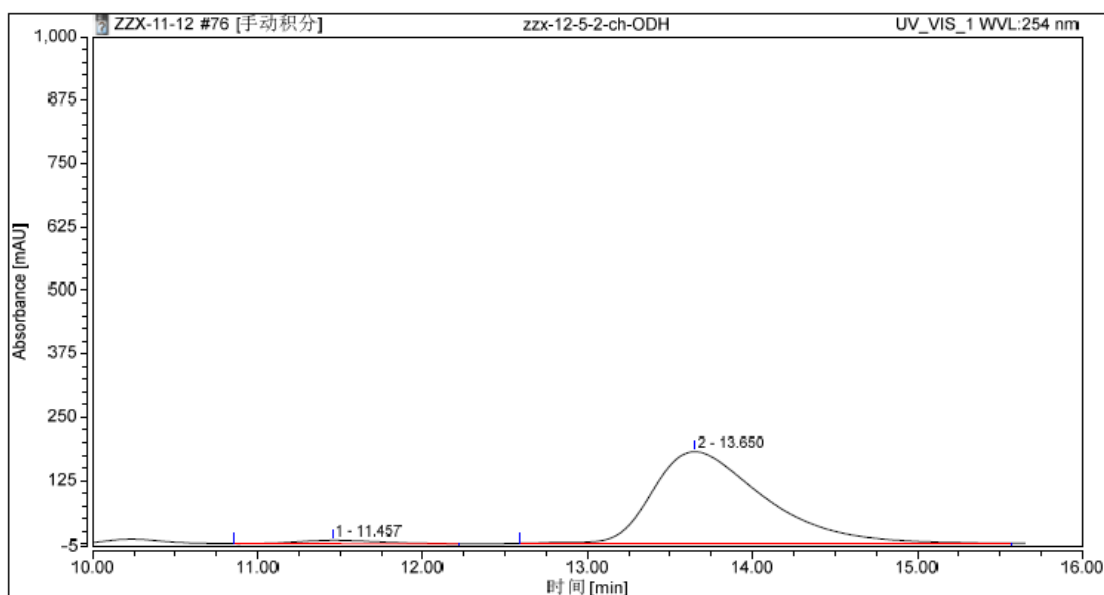

| Integration Results |           |                    |              |            |                 |                   |             |
|---------------------|-----------|--------------------|--------------|------------|-----------------|-------------------|-------------|
| No.                 | Peak Name | Retention Time min | Area mAU*min | Height mAU | Relative Area % | Relative Height % | Amount n.a. |
| 1                   |           | 11.457             | 3.788        | 6.628      | 2.61            | 3.54              | n.a.        |
| 2                   |           | 13.650             | 141.269      | 180.620    | 97.39           | 96.46             | n.a.        |
| Total:              |           |                    | 145.056      | 187.248    | 100.00          | 100.00            |             |

Compound **2z**: HPLC (ADH, *n*-hexane/2-propanol = 70/30,  $v = 1.0$  mL/min,  $\lambda = 254$  nm)

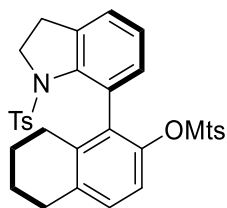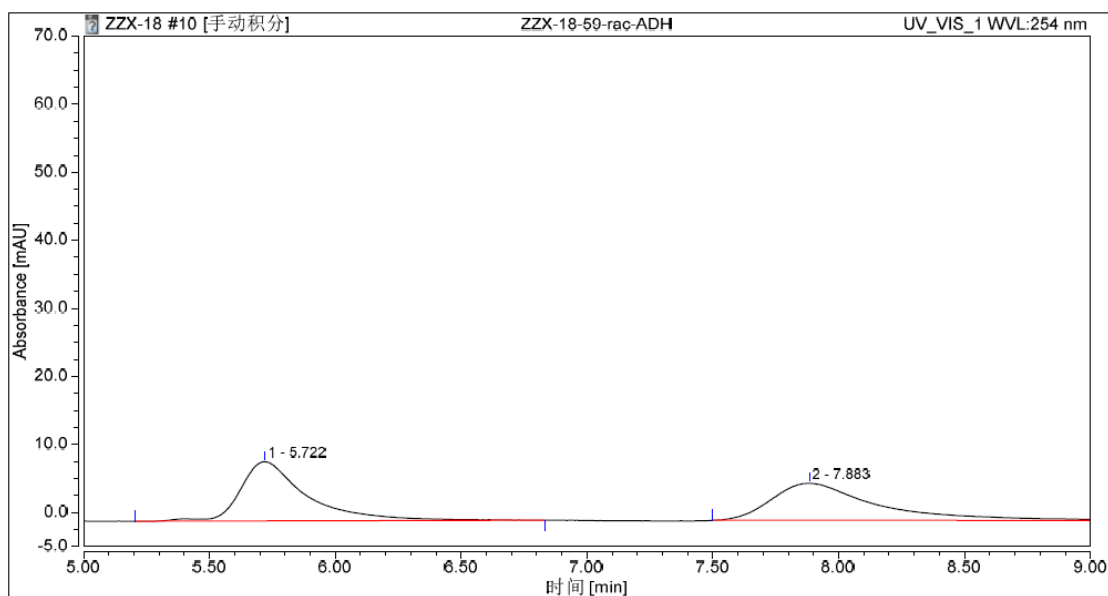

| Integration Results |           |                    |              |            |                 |                   |        |
|---------------------|-----------|--------------------|--------------|------------|-----------------|-------------------|--------|
| No.                 | Peak Name | Retention Time min | Area mAU*min | Height mAU | Relative Area % | Relative Height % | Amount |
| 1                   |           | 5.722              | 2.638        | 8.693      | 50.18           | 61.48             | n.a.   |
| 2                   |           | 7.883              | 2.619        | 5.446      | 49.82           | 38.52             | n.a.   |
| Total:              |           |                    | 5.257        | 14.140     | 100.00          | 100.00            |        |

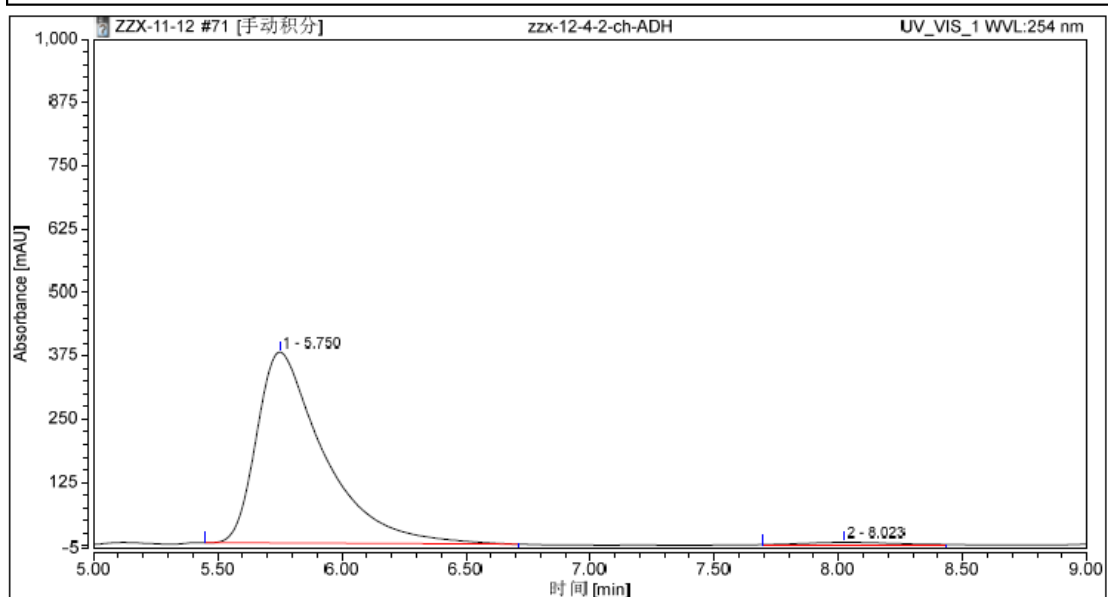

| Integration Results |           |                    |              |            |                 |                   |        |
|---------------------|-----------|--------------------|--------------|------------|-----------------|-------------------|--------|
| No.                 | Peak Name | Retention Time min | Area mAU*min | Height mAU | Relative Area % | Relative Height % | Amount |
| 1                   |           | 5.750              | 118.562      | 376.645    | 98.60           | 98.80             | n.a.   |
| 2                   |           | 8.023              | 1.687        | 4.562      | 1.40            | 1.20              | n.a.   |
| Total:              |           |                    | 120.249      | 381.207    | 100.00          | 100.00            |        |

Compound **2aa**: HPLC (ODH, *n*-hexane/2-propanol = 70/30,  $v = 1.0$  mL/min,  $\lambda = 254$  nm)

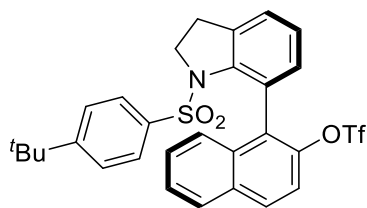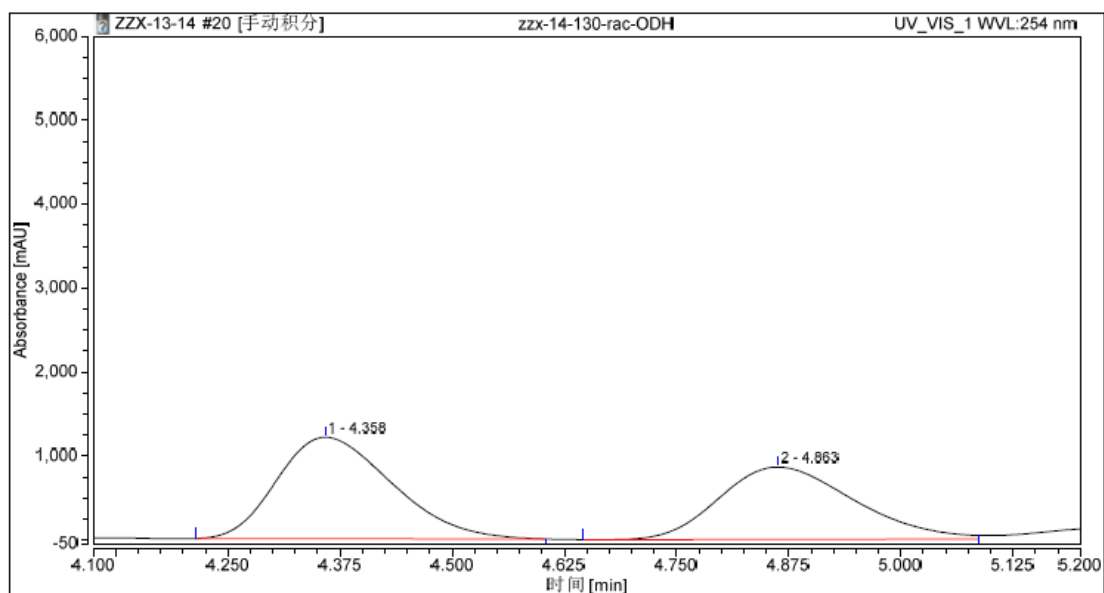

| Integration Results |           |                       |                 |               |                    |                      |                |
|---------------------|-----------|-----------------------|-----------------|---------------|--------------------|----------------------|----------------|
| No.                 | Peak Name | Retention Time<br>min | Area<br>mAU*min | Height<br>mAU | Relative Area<br>% | Relative Height<br>% | Amount<br>n.a. |
| 1                   |           | 4.358                 | 179.552         | 1208.526      | 54.50              | 58.38                | n.a.           |
| 2                   |           | 4.863                 | 149.906         | 861.425       | 45.50              | 41.62                | n.a.           |
| Total:              |           |                       | 329.458         | 2069.951      | 100.00             | 100.00               |                |

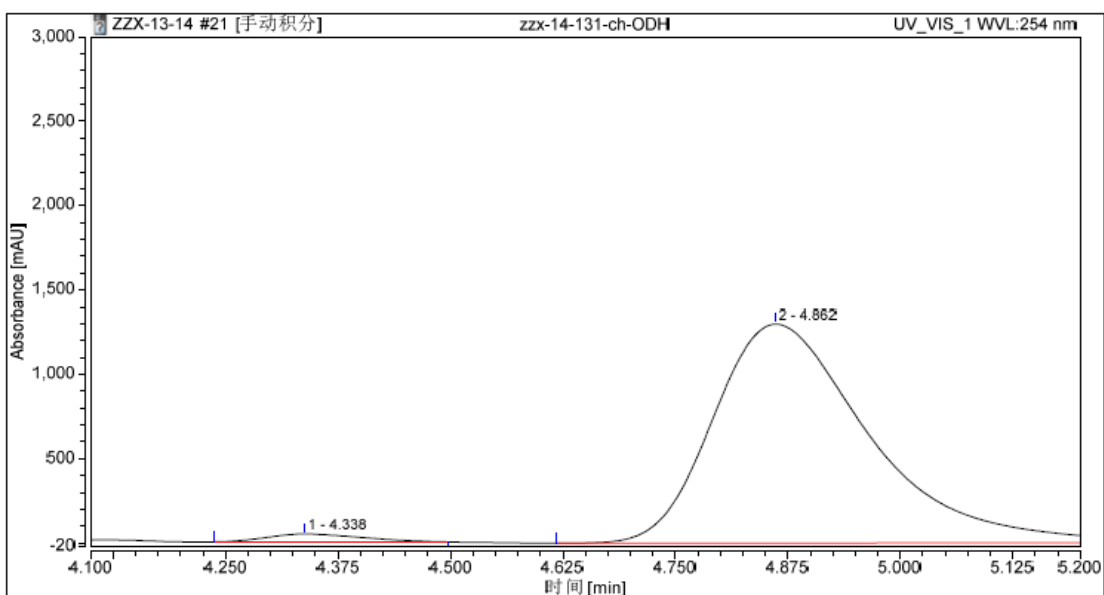

| Integration Results |           |                       |                 |               |                    |                      |                |
|---------------------|-----------|-----------------------|-----------------|---------------|--------------------|----------------------|----------------|
| No.                 | Peak Name | Retention Time<br>min | Area<br>mAU*min | Height<br>mAU | Relative Area<br>% | Relative Height<br>% | Amount<br>n.a. |
| 1                   |           | 4.338                 | 5.749           | 47.798        | 2.15               | 3.55                 | n.a.           |
| 2                   |           | 4.862                 | 262.216         | 1297.123      | 97.85              | 96.45                | n.a.           |
| Total:              |           |                       | 267.965         | 1344.921      | 100.00             | 100.00               |                |

Compound **2ab**: HPLC (IG, *n*-hexane/2-propanol = 85/15,  $v = 1.0$  mL/min,  $\lambda = 254$  nm)

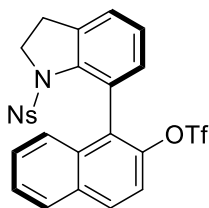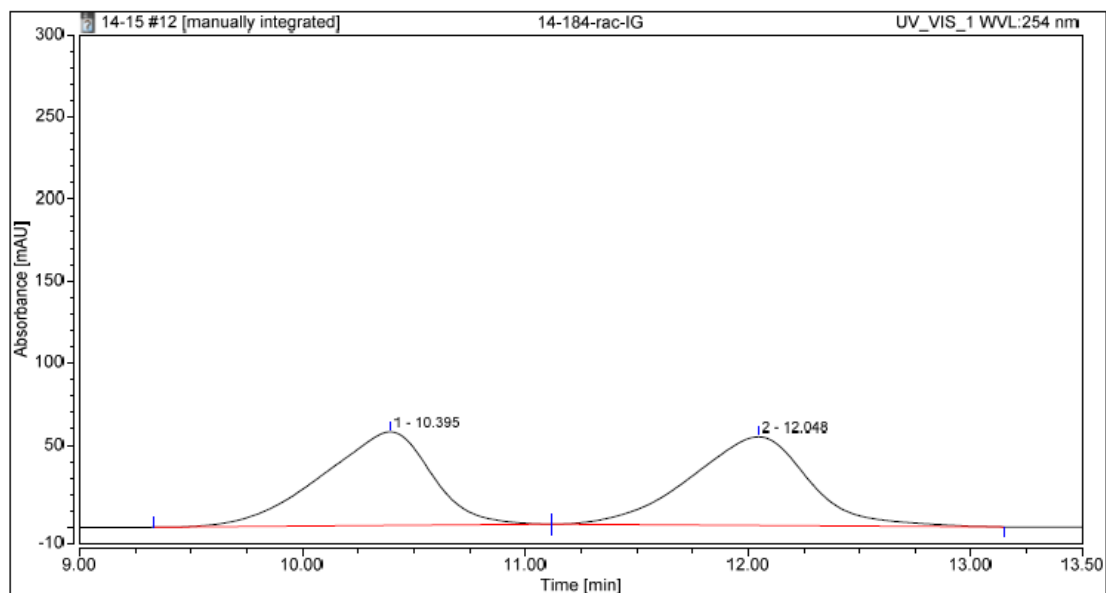

| Integration Results |           |                    |              |            |                 |                   |             |
|---------------------|-----------|--------------------|--------------|------------|-----------------|-------------------|-------------|
| No.                 | Peak Name | Retention Time min | Area mAU*min | Height mAU | Relative Area % | Relative Height % | Amount n.a. |
| 1                   |           | 10.395             | 32.550       | 56.983     | 49.50           | 51.37             | n.a.        |
| 2                   |           | 12.048             | 33.212       | 53.947     | 50.50           | 48.63             | n.a.        |
| Total:              |           |                    | 65.763       | 110.930    | 100.00          | 100.00            |             |

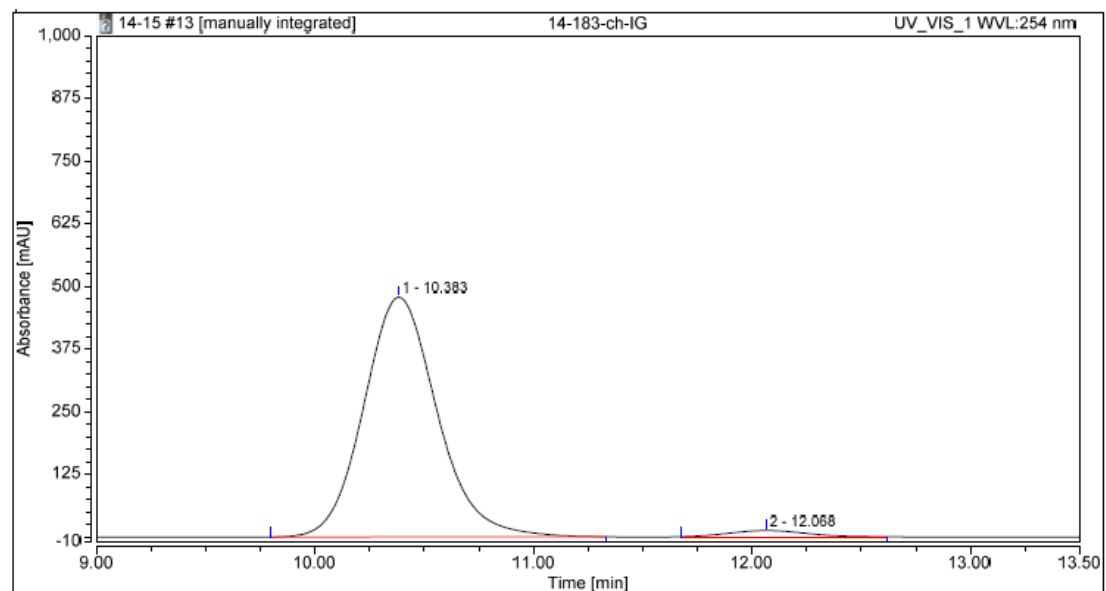

| Integration Results |           |                    |              |            |                 |                   |             |
|---------------------|-----------|--------------------|--------------|------------|-----------------|-------------------|-------------|
| No.                 | Peak Name | Retention Time min | Area mAU*min | Height mAU | Relative Area % | Relative Height % | Amount n.a. |
| 1                   |           | 10.383             | 186.491      | 478.230    | 97.41           | 97.46             | n.a.        |
| 2                   |           | 12.068             | 4.964        | 12.453     | 2.59            | 2.54              | n.a.        |
| Total:              |           |                    | 191.455      | 490.683    | 100.00          | 100.00            |             |

Compound **2ac**: HPLC (IA, *n*-hexane/2-propanol = 85/15,  $v = 1.0$  mL/min,  $\lambda = 254$  nm)

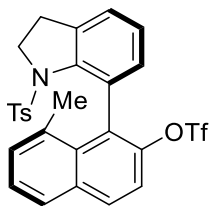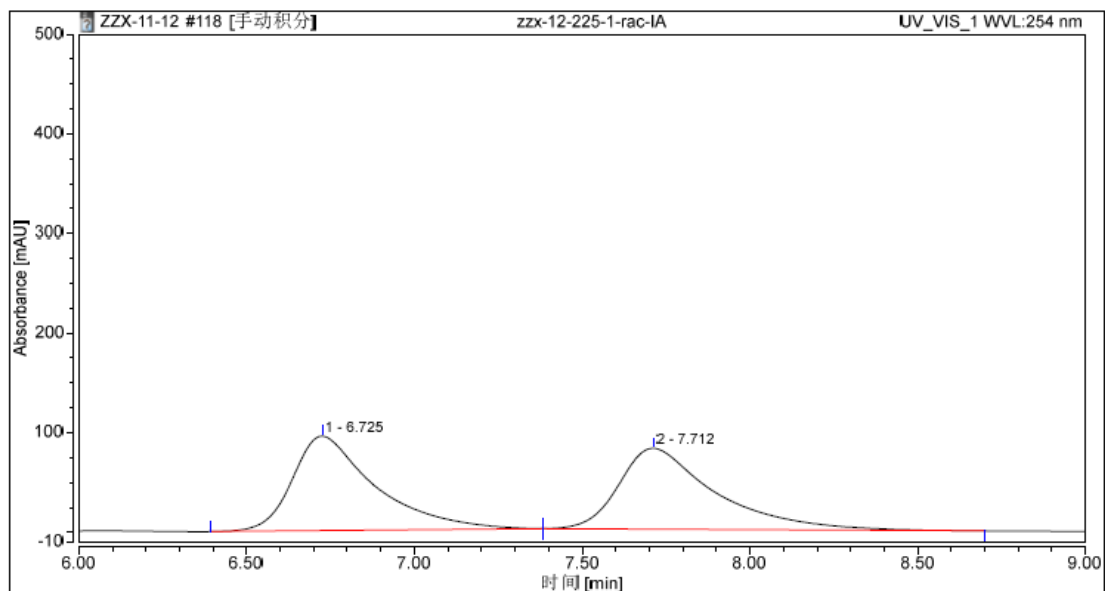

| Integration Results |           |                    |              |            |                 |                   |        |
|---------------------|-----------|--------------------|--------------|------------|-----------------|-------------------|--------|
| No.                 | Peak Name | Retention Time min | Area mAU*min | Height mAU | Relative Area % | Relative Height % | Amount |
| 1                   |           | 6.725              | 27.010       | 94.777     | 50.14           | 53.85             | n.a.   |
| 2                   |           | 7.712              | 26.860       | 81.232     | 49.86           | 46.15             | n.a.   |
| Total:              |           |                    | 53.870       | 176.009    | 100.00          | 100.00            |        |

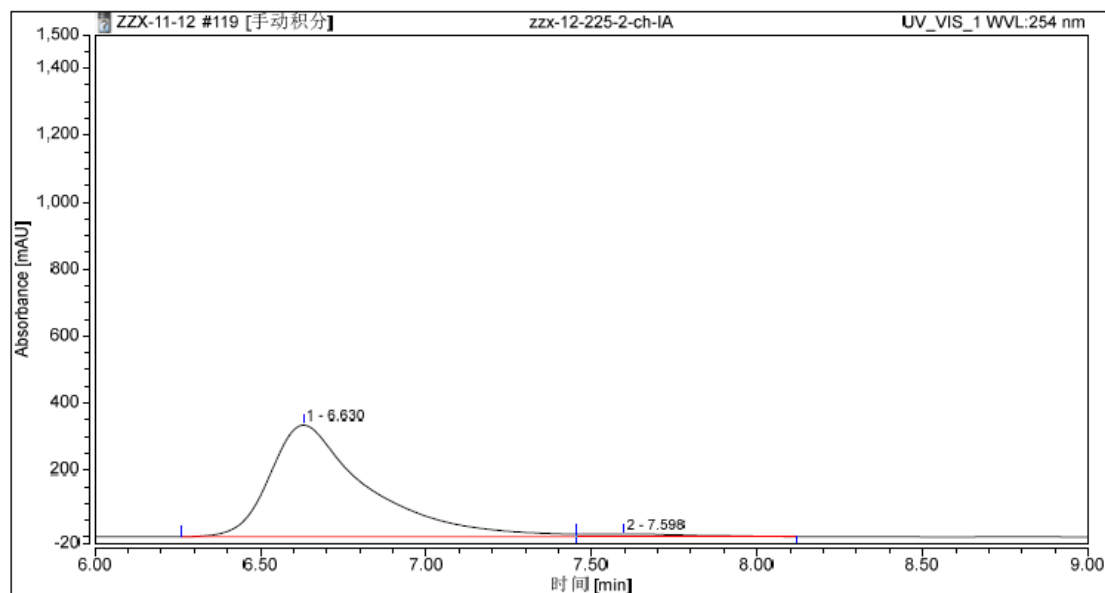

| Integration Results |           |                    |              |            |                 |                   |        |
|---------------------|-----------|--------------------|--------------|------------|-----------------|-------------------|--------|
| No.                 | Peak Name | Retention Time min | Area mAU*min | Height mAU | Relative Area % | Relative Height % | Amount |
| 1                   |           | 6.630              | 113.676      | 333.091    | 97.58           | 97.66             | n.a.   |
| 2                   |           | 7.598              | 2.817        | 7.976      | 2.42            | 2.34              | n.a.   |
| Total:              |           |                    | 116.493      | 341.067    | 100.00          | 100.00            |        |

Compound **2ad**: HPLC (IA, *n*-hexane/2-propanol = 70/30,  $v = 1.0$  mL/min,  $\lambda = 254$  nm)

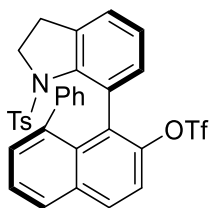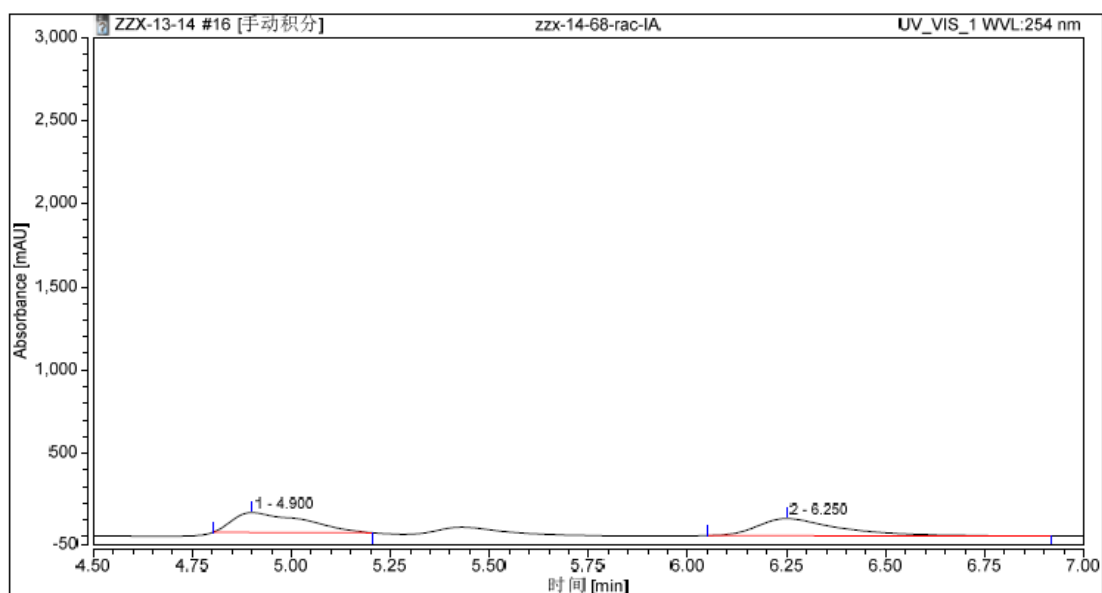

| Integration Results |           |                       |                 |               |                    |                      |                |
|---------------------|-----------|-----------------------|-----------------|---------------|--------------------|----------------------|----------------|
| No.                 | Peak Name | Retention Time<br>min | Area<br>mAU*min | Height<br>mAU | Relative Area<br>% | Relative Height<br>% | Amount<br>n.a. |
| 1                   |           | 4.900                 | 24.994          | 119.962       | 50.44              | 53.84                | n.a.           |
| 2                   |           | 6.250                 | 24.562          | 102.869       | 49.56              | 46.16                | n.a.           |
| Total:              |           |                       | 49.556          | 222.831       | 100.00             | 100.00               |                |

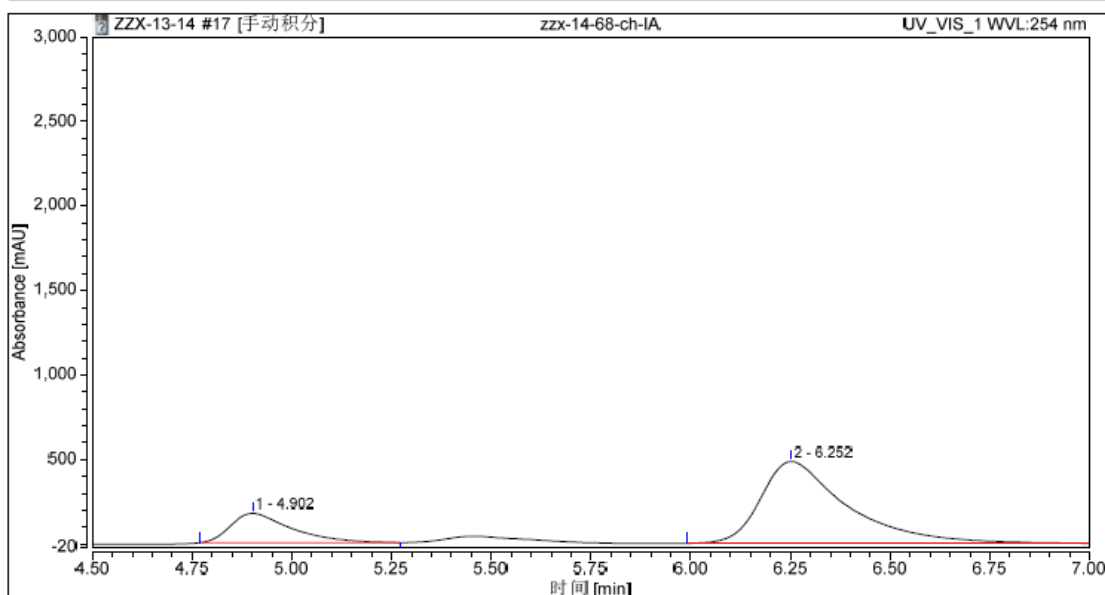

| Integration Results |           |                       |                 |               |                    |                      |                |
|---------------------|-----------|-----------------------|-----------------|---------------|--------------------|----------------------|----------------|
| No.                 | Peak Name | Retention Time<br>min | Area<br>mAU*min | Height<br>mAU | Relative Area<br>% | Relative Height<br>% | Amount<br>n.a. |
| 1                   |           | 4.902                 | 30.435          | 173.550       | 20.03              | 26.38                | n.a.           |
| 2                   |           | 6.252                 | 121.509         | 484.393       | 79.97              | 73.62                | n.a.           |
| Total:              |           |                       | 151.944         | 657.943       | 100.00             | 100.00               |                |

Compound **2ae**: HPLC (ODH, *n*-hexane/2-propanol = 85/15,  $v = 1.0$  mL/min,  $\lambda = 254$  nm)

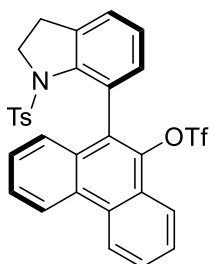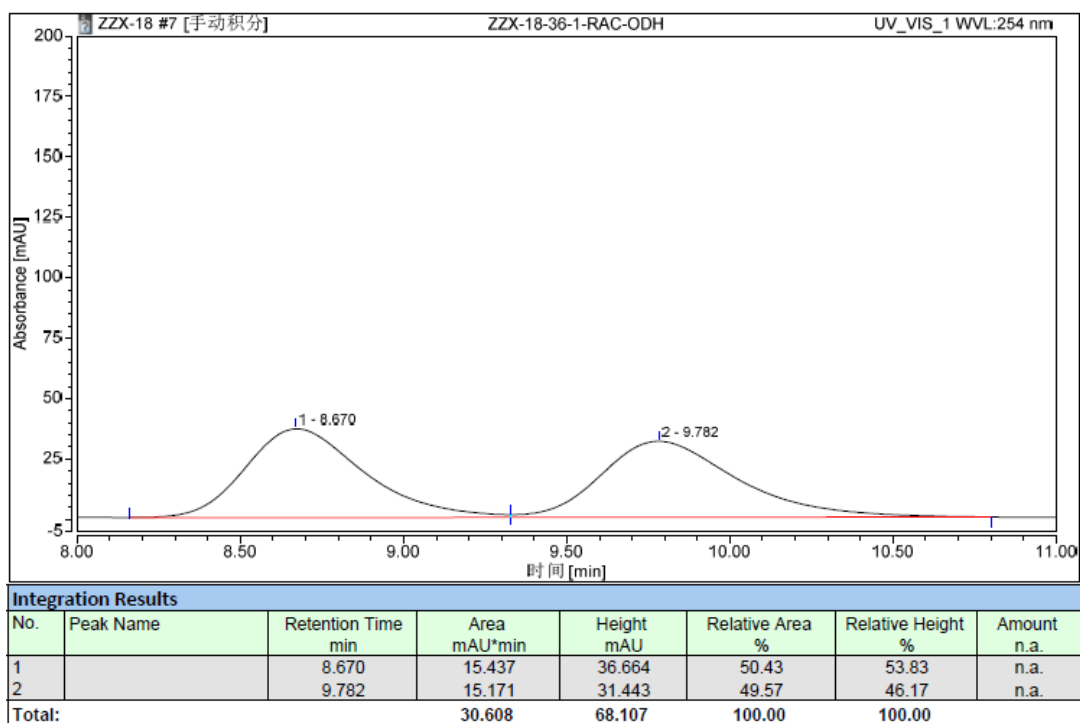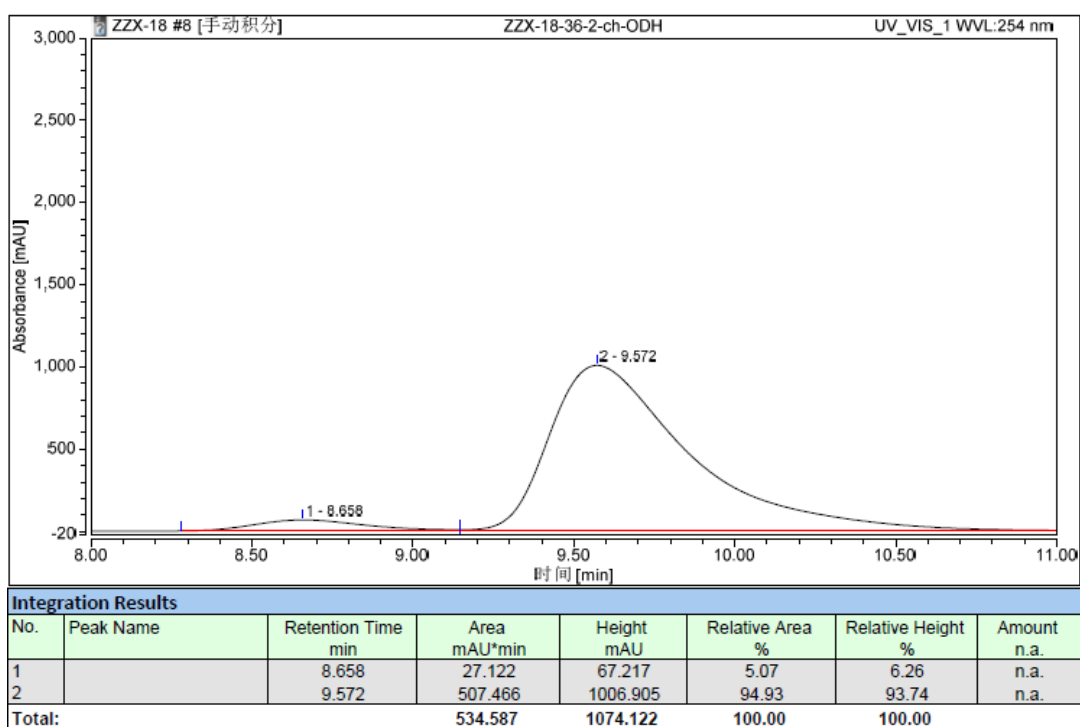

Compound **2af**: HPLC (ADH, *n*-hexane/2-propanol = 90/10,  $v = 1.0$  mL/min,  $\lambda = 254$  nm)

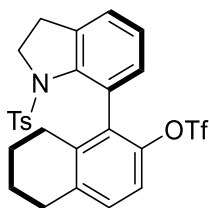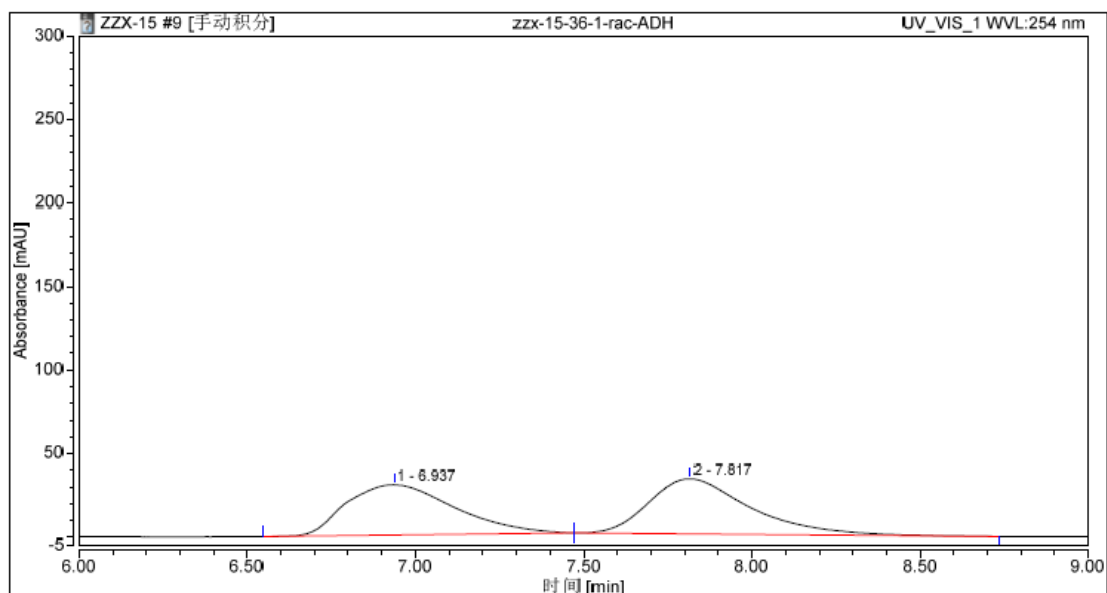

| Integration Results |           |                    |              |            |                 |                   |        |
|---------------------|-----------|--------------------|--------------|------------|-----------------|-------------------|--------|
| No.                 | Peak Name | Retention Time min | Area mAU*min | Height mAU | Relative Area % | Relative Height % | Amount |
| 1                   |           | 6.937              | 11.141       | 30.007     | 49.39           | 47.69             | n.a.   |
| 2                   |           | 7.817              | 11.418       | 32.908     | 50.61           | 52.31             | n.a.   |
| Total:              |           |                    | 22.559       | 62.915     | 100.00          | 100.00            |        |

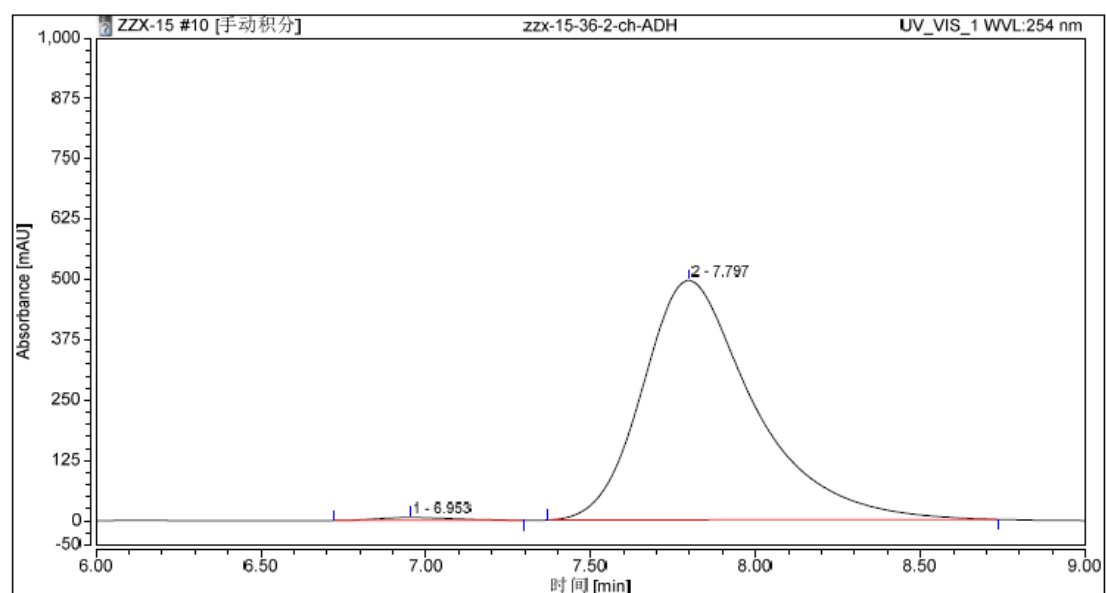

| Integration Results |           |                    |              |            |                 |                   |        |
|---------------------|-----------|--------------------|--------------|------------|-----------------|-------------------|--------|
| No.                 | Peak Name | Retention Time min | Area mAU*min | Height mAU | Relative Area % | Relative Height % | Amount |
| 1                   |           | 6.953              | 1.719        | 6.325      | 0.88            | 1.26              | n.a.   |
| 2                   |           | 7.797              | 194.300      | 495.637    | 99.12           | 98.74             | n.a.   |
| Total:              |           |                    | 196.019      | 501.961    | 100.00          | 100.00            |        |



Compound **2ag**: HPLC (ADH, *n*-hexane/2-propanol = 70/30,  $v = 1.0$  mL/min,  $\lambda = 254$  nm)

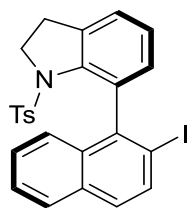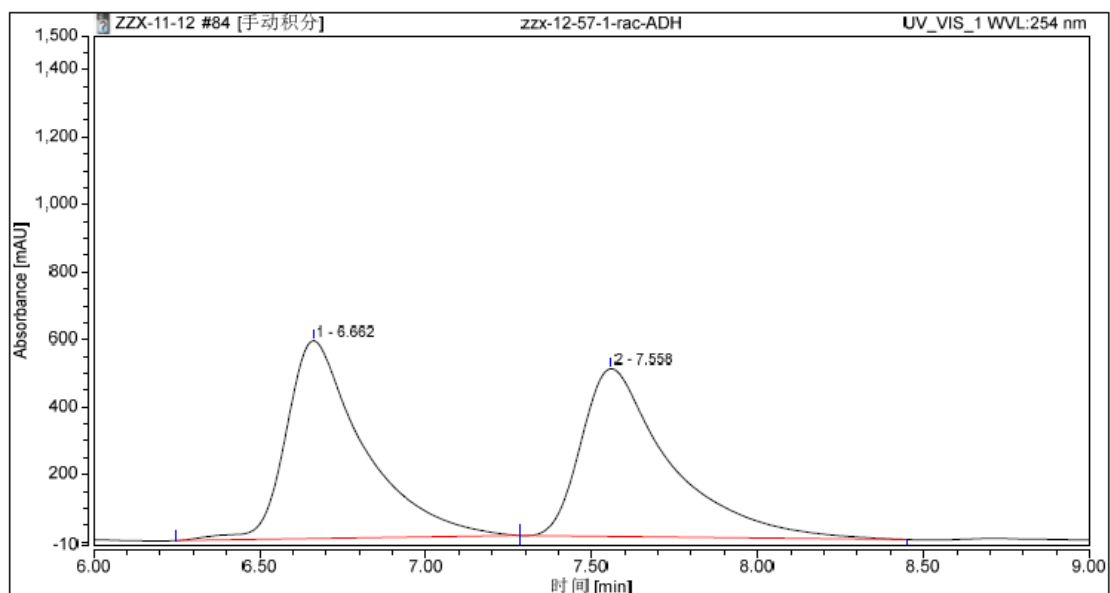

| Integration Results |           |                    |              |            |                 |                   |        |
|---------------------|-----------|--------------------|--------------|------------|-----------------|-------------------|--------|
| No.                 | Peak Name | Retention Time min | Area mAU*min | Height mAU | Relative Area % | Relative Height % | Amount |
| 1                   |           | 6.662              | 158.521      | 585.913    | 50.87           | 54.11             | n.a.   |
| 2                   |           | 7.558              | 153.079      | 496.981    | 49.13           | 45.89             | n.a.   |
| Total:              |           |                    | 311.600      | 1082.894   | 100.00          | 100.00            |        |

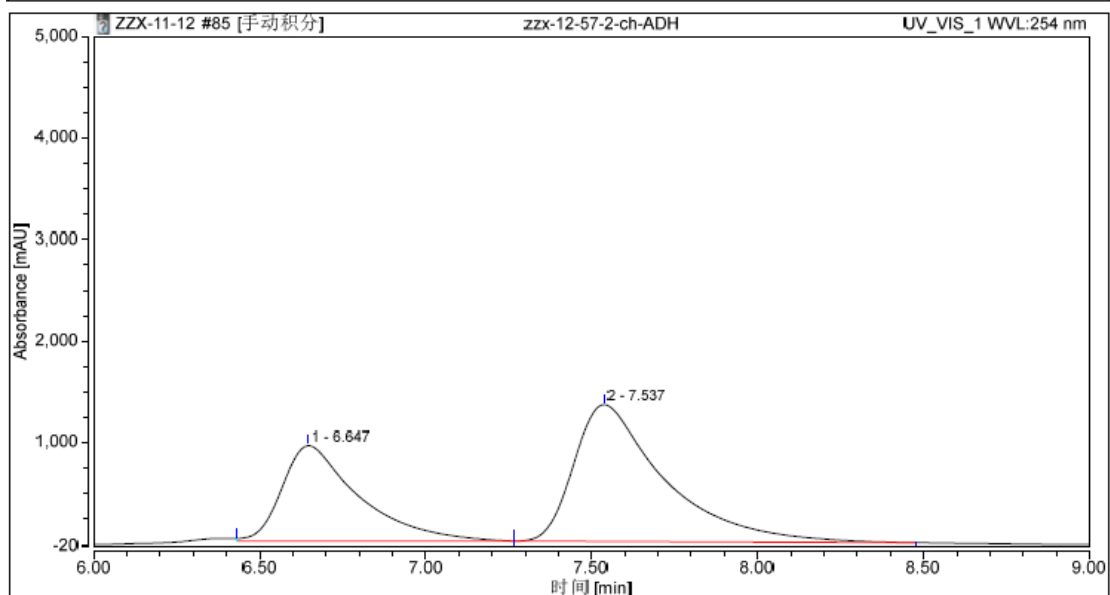

| Integration Results |           |                    |              |            |                 |                   |        |
|---------------------|-----------|--------------------|--------------|------------|-----------------|-------------------|--------|
| No.                 | Peak Name | Retention Time min | Area mAU*min | Height mAU | Relative Area % | Relative Height % | Amount |
| 1                   |           | 6.647              | 251.441      | 939.252    | 37.27           | 41.14             | n.a.   |
| 2                   |           | 7.537              | 423.159      | 1343.874   | 62.73           | 58.86             | n.a.   |
| Total:              |           |                    | 674.600      | 2283.126   | 100.00          | 100.00            |        |

Compound **2ah**: HPLC (ADH, *n*-hexane/2-propanol = 85/15,  $v = 1.0$  mL/min,  $\lambda = 254$  nm)

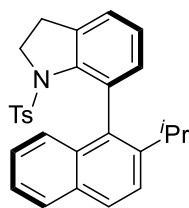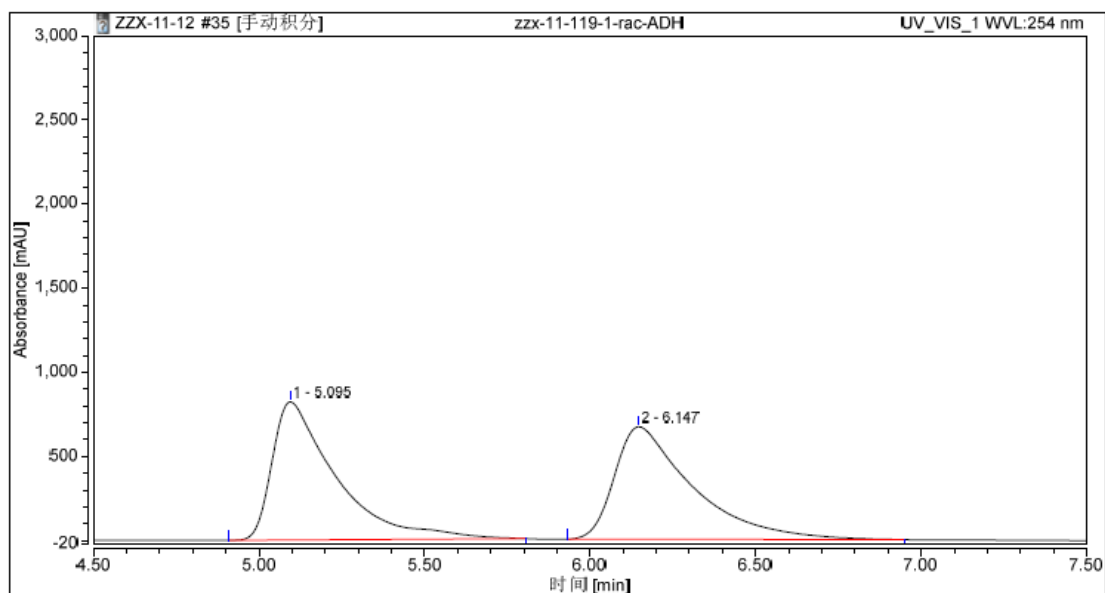

| Integration Results |           |                       |                 |               |                    |                      |                |
|---------------------|-----------|-----------------------|-----------------|---------------|--------------------|----------------------|----------------|
| No.                 | Peak Name | Retention Time<br>min | Area<br>mAU*min | Height<br>mAU | Relative Area<br>% | Relative Height<br>% | Amount<br>n.a. |
| 1                   |           | 5.095                 | 183.073         | 820.277       | 50.13              | 55.11                | n.a.           |
| 2                   |           | 6.147                 | 182.139         | 668.224       | 49.87              | 44.89                | n.a.           |
| Total:              |           |                       | 365.212         | 1488.501      | 100.00             | 100.00               |                |

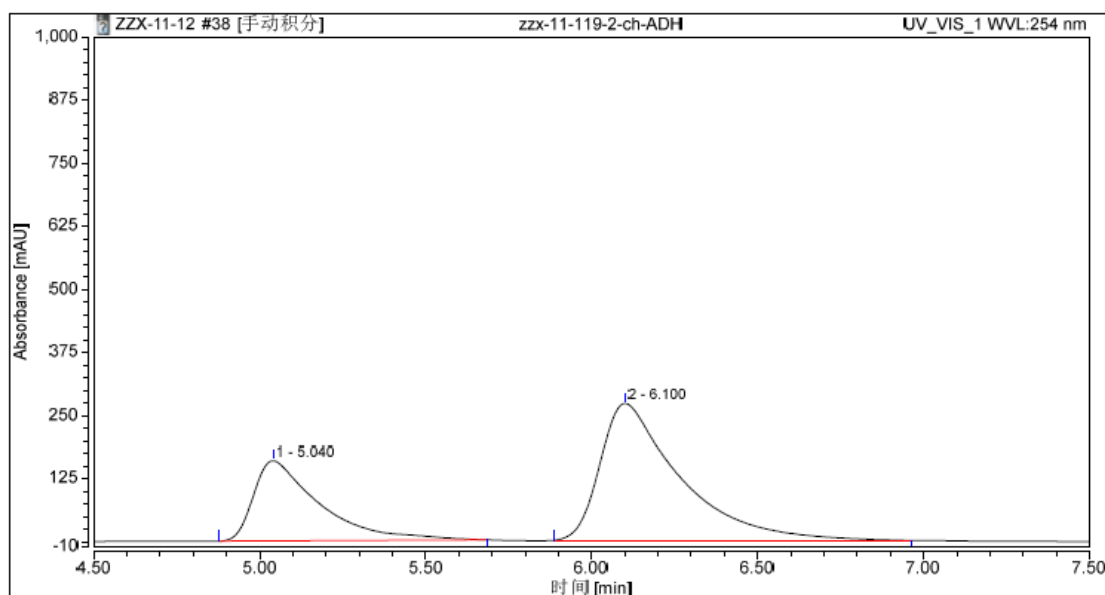

| Integration Results |           |                       |                 |               |                    |                      |                |
|---------------------|-----------|-----------------------|-----------------|---------------|--------------------|----------------------|----------------|
| No.                 | Peak Name | Retention Time<br>min | Area<br>mAU*min | Height<br>mAU | Relative Area<br>% | Relative Height<br>% | Amount<br>n.a. |
| 1                   |           | 5.040                 | 36.367          | 158.625       | 32.60              | 36.93                | n.a.           |
| 2                   |           | 6.100                 | 75.196          | 270.934       | 67.40              | 63.07                | n.a.           |
| Total:              |           |                       | 111.563         | 429.559       | 100.00             | 100.00               |                |

Compound **2ai**: HPLC (ADH, *n*-hexane/2-propanol = 85/15,  $v = 1.0$  mL/min,  $\lambda = 254$  nm)

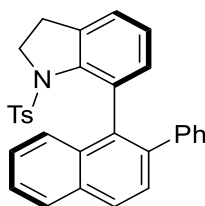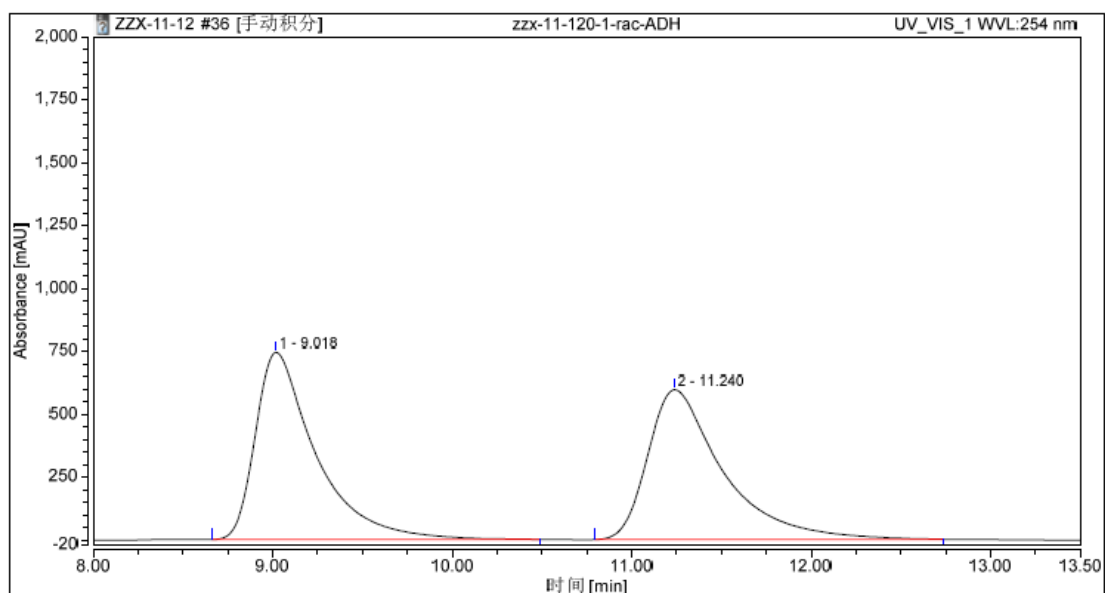

| Integration Results |           |                    |              |            |                 |                   |        |
|---------------------|-----------|--------------------|--------------|------------|-----------------|-------------------|--------|
| No.                 | Peak Name | Retention Time min | Area mAU*min | Height mAU | Relative Area % | Relative Height % | Amount |
| 1                   |           | 9.018              | 290.202      | 744.178    | 50.15           | 55.56             | n.a.   |
| 2                   |           | 11.240             | 288.437      | 595.281    | 49.85           | 44.44             | n.a.   |
| Total:              |           |                    | 578.639      | 1339.459   | 100.00          | 100.00            |        |

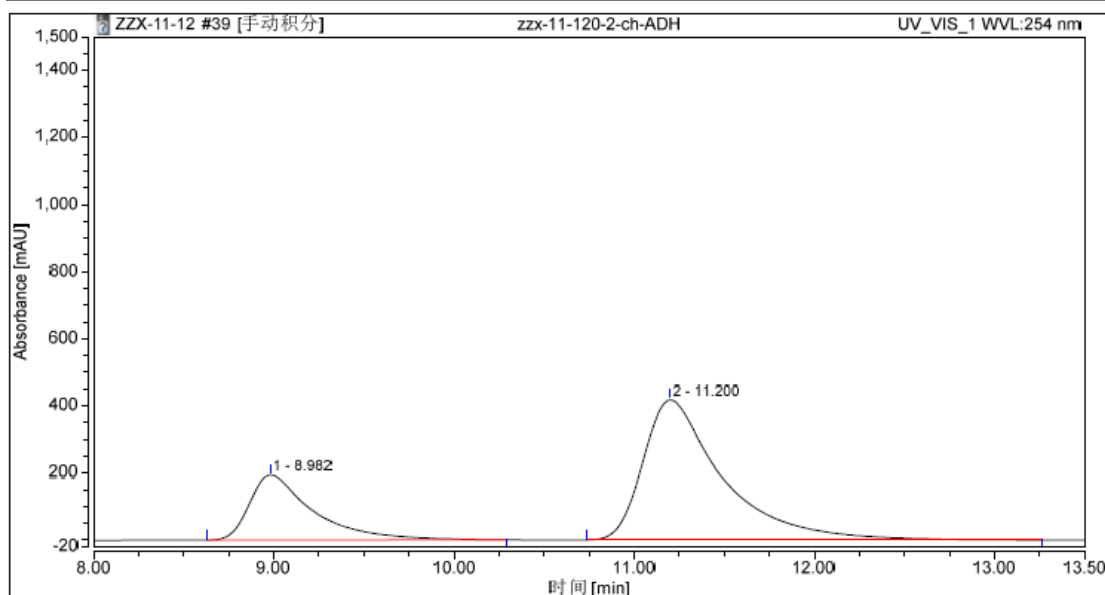

| Integration Results |           |                    |              |            |                 |                   |        |
|---------------------|-----------|--------------------|--------------|------------|-----------------|-------------------|--------|
| No.                 | Peak Name | Retention Time min | Area mAU*min | Height mAU | Relative Area % | Relative Height % | Amount |
| 1                   |           | 8.982              | 79.201       | 194.476    | 27.07           | 31.79             | n.a.   |
| 2                   |           | 11.200             | 213.353      | 417.312    | 72.93           | 68.21             | n.a.   |
| Total:              |           |                    | 292.554      | 611.787    | 100.00          | 100.00            |        |

2aj: HPLC (ODH, *n*-hexane/2-propanol = 70/30,  $v = 1.0$  mL/min,  $\lambda = 254$  nm)

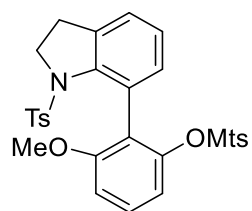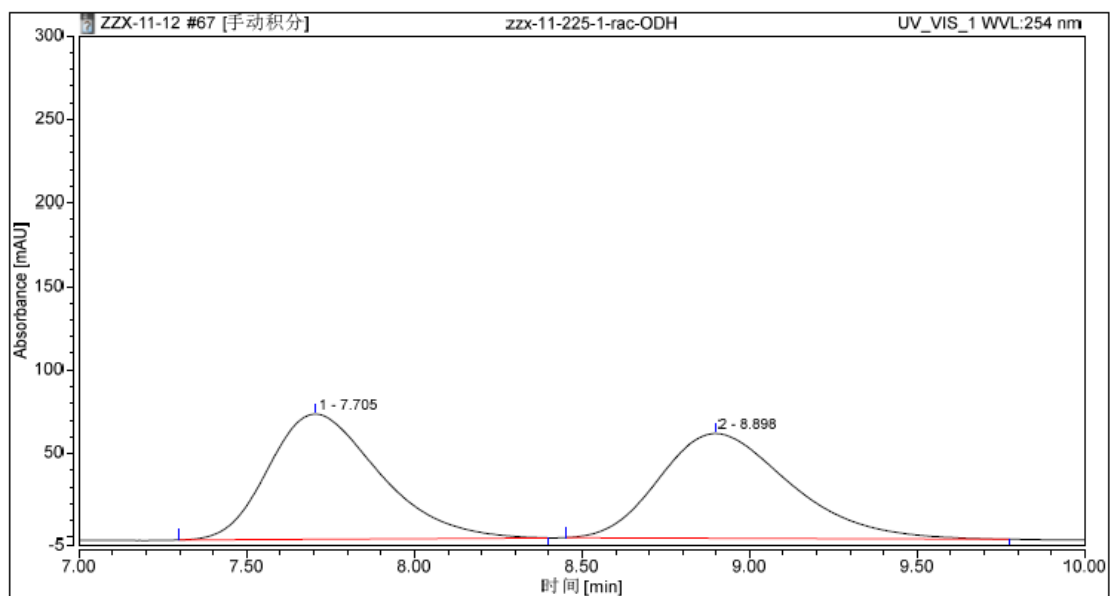

| Integration Results |           |                    |              |            |                 |                   |        |
|---------------------|-----------|--------------------|--------------|------------|-----------------|-------------------|--------|
| No.                 | Peak Name | Retention Time min | Area mAU*min | Height mAU | Relative Area % | Relative Height % | Amount |
| 1                   |           | 7.705              | 28.764       | 74.896     | 50.40           | 54.47             | n.a.   |
| 2                   |           | 8.898              | 28.307       | 62.597     | 49.60           | 45.53             | n.a.   |
| Total:              |           |                    | 57.072       | 137.493    | 100.00          | 100.00            |        |

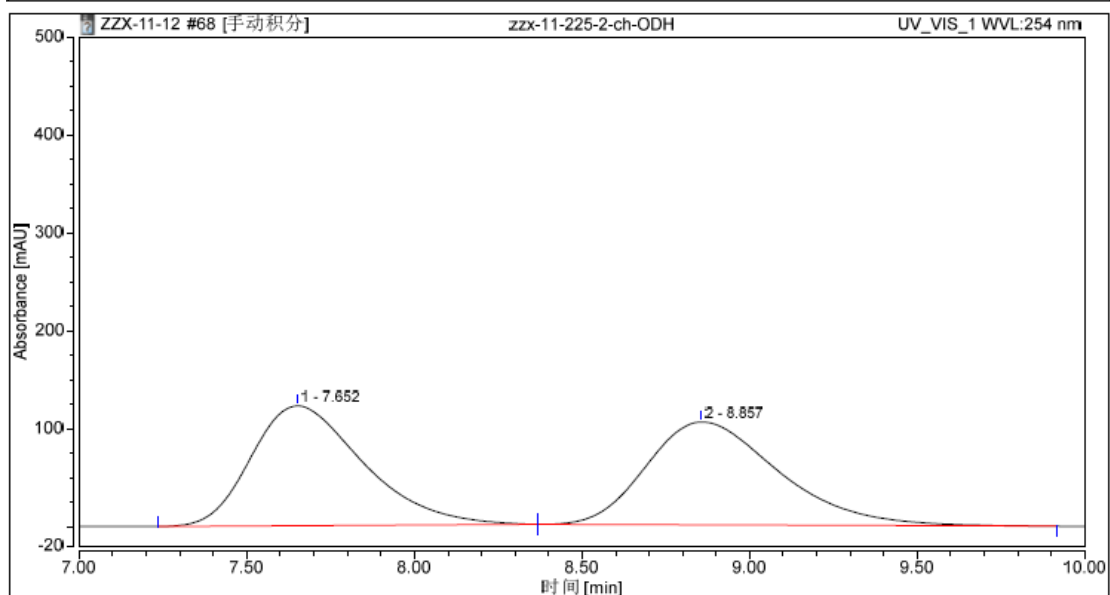

| Integration Results |           |                    |              |            |                 |                   |        |
|---------------------|-----------|--------------------|--------------|------------|-----------------|-------------------|--------|
| No.                 | Peak Name | Retention Time min | Area mAU*min | Height mAU | Relative Area % | Relative Height % | Amount |
| 1                   |           | 7.652              | 47.407       | 122.237    | 49.67           | 53.81             | n.a.   |
| 2                   |           | 8.857              | 48.040       | 104.925    | 50.33           | 46.19             | n.a.   |
| Total:              |           |                    | 95.447       | 227.162    | 100.00          | 100.00            |        |

Compound 4: HPLC (ODH, *n*-hexane/2-propanol = 90/10,  $v = 1.0$  mL/min,  $\lambda = 254$  nm)

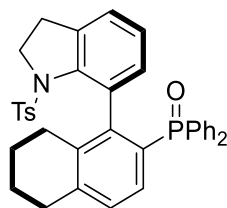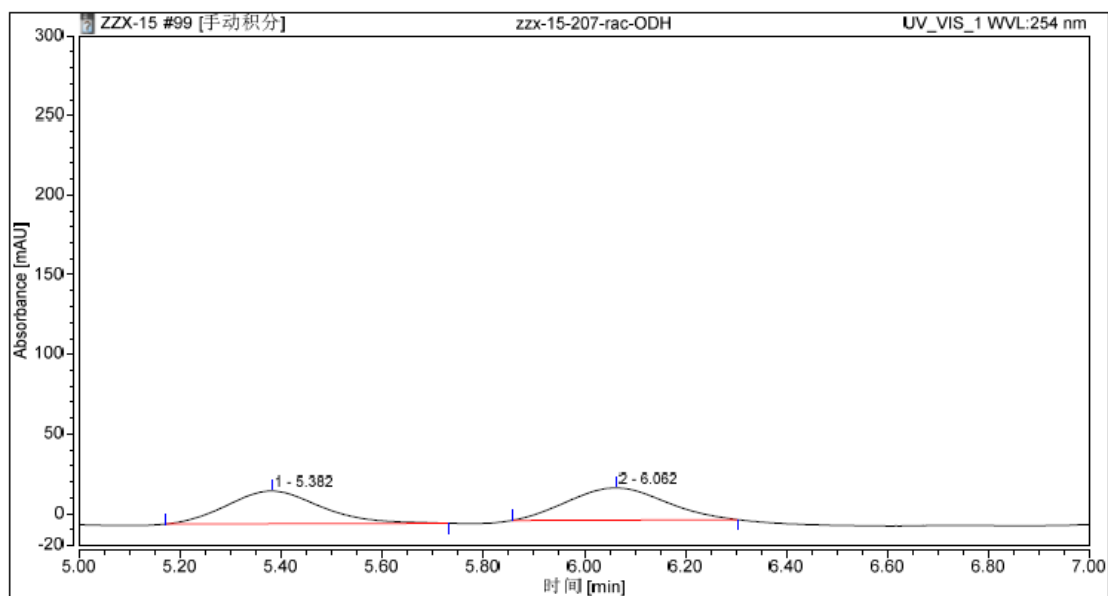

| Integration Results |           |                    |              |            |                 |                   |        |
|---------------------|-----------|--------------------|--------------|------------|-----------------|-------------------|--------|
| No.                 | Peak Name | Retention Time min | Area mAU*min | Height mAU | Relative Area % | Relative Height % | Amount |
| 1                   |           | 5.382              | 4.397        | 20.529     | 49.40           | 50.43             | n.a.   |
| 2                   |           | 6.062              | 4.503        | 20.175     | 50.60           | 49.57             | n.a.   |
| Total:              |           |                    | 8.900        | 40.704     | 100.00          | 100.00            |        |

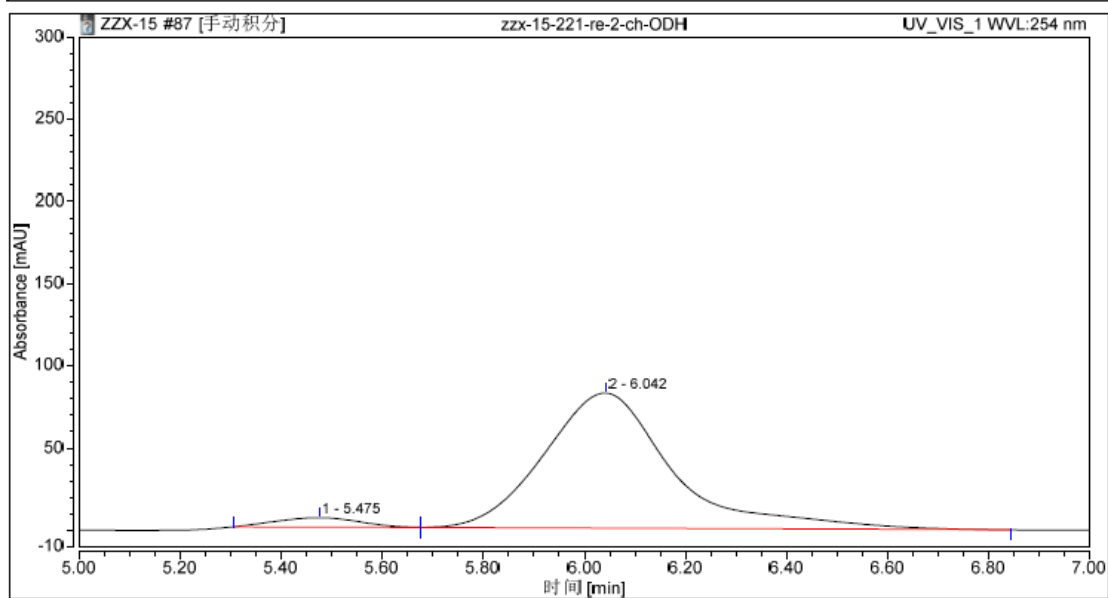

| Integration Results |           |                    |              |            |                 |                   |        |
|---------------------|-----------|--------------------|--------------|------------|-----------------|-------------------|--------|
| No.                 | Peak Name | Retention Time min | Area mAU*min | Height mAU | Relative Area % | Relative Height % | Amount |
| 1                   |           | 5.475              | 1.073        | 5.684      | 4.27            | 6.48              | n.a.   |
| 2                   |           | 6.042              | 24.070       | 82.068     | 95.73           | 93.52             | n.a.   |
| Total:              |           |                    | 25.143       | 87.752     | 100.00          | 100.00            |        |

Compound **5**: HPLC (IA, *n*-hexane/2-propanol = 80/20,  $v = 1.0$  mL/min,  $\lambda = 254$  nm)

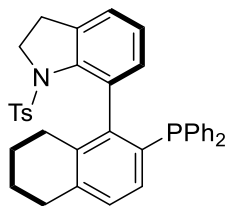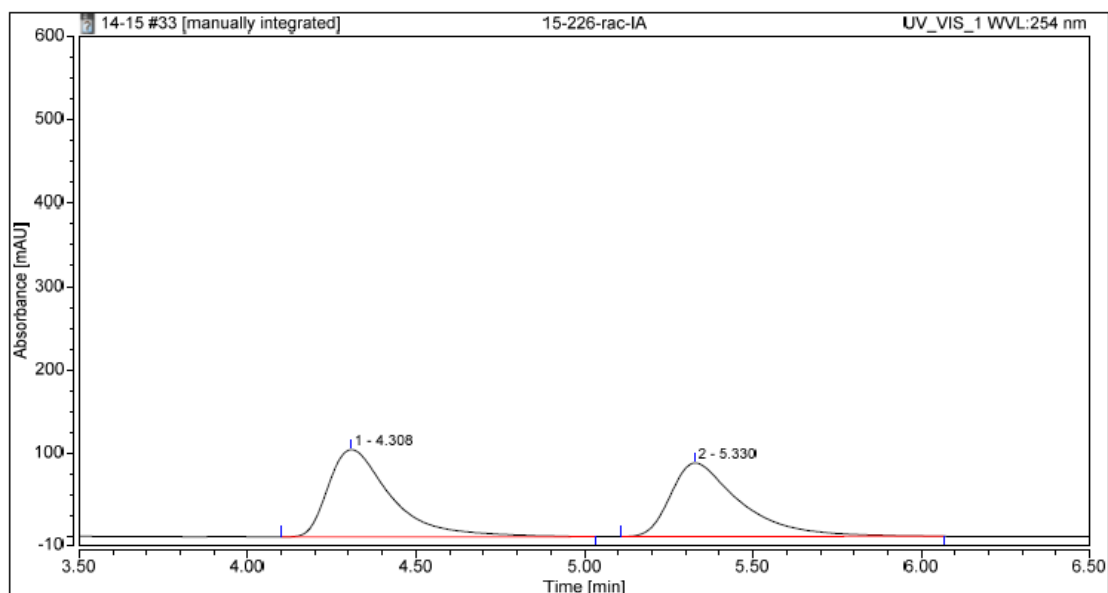

| Integration Results |           |                    |              |            |                 |                   |        |
|---------------------|-----------|--------------------|--------------|------------|-----------------|-------------------|--------|
| No.                 | Peak Name | Retention Time min | Area mAU*min | Height mAU | Relative Area % | Relative Height % | Amount |
| 1                   |           | 4.308              | 22.633       | 104.465    | 51.67           | 54.26             | n.a.   |
| 2                   |           | 5.330              | 21.166       | 88.075     | 48.33           | 45.74             | n.a.   |
| Total:              |           |                    | 43.799       | 192.541    | 100.00          | 100.00            |        |

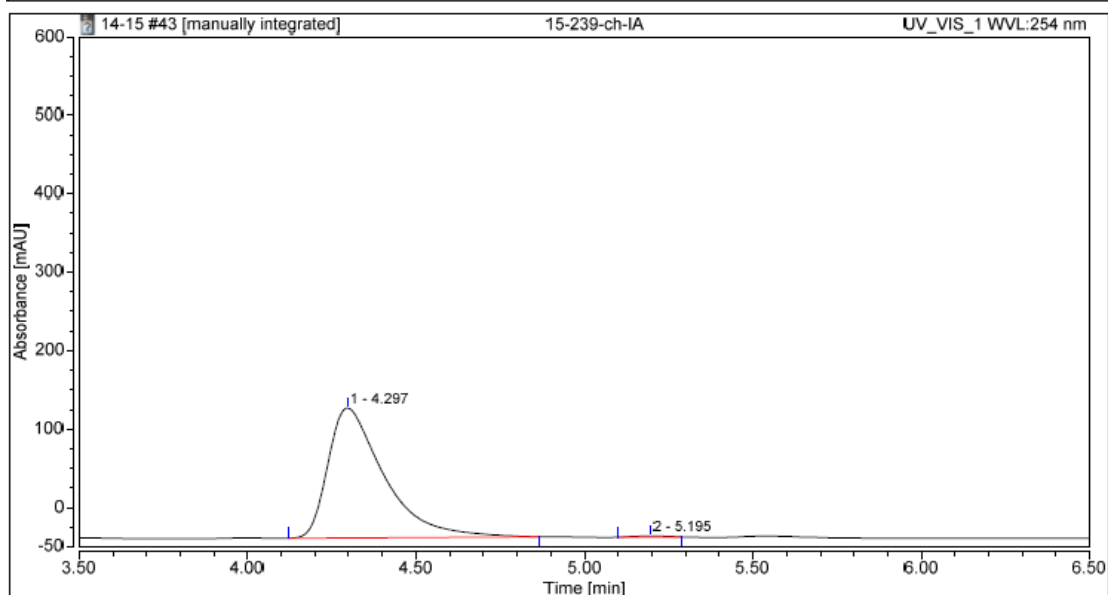

| Integration Results |           |                    |              |            |                 |                   |        |
|---------------------|-----------|--------------------|--------------|------------|-----------------|-------------------|--------|
| No.                 | Peak Name | Retention Time min | Area mAU*min | Height mAU | Relative Area % | Relative Height % | Amount |
| 1                   |           | 4.297              | 31.996       | 165.628    | 99.48           | 99.12             | n.a.   |
| 2                   |           | 5.195              | 0.166        | 1.469      | 0.52            | 0.88              | n.a.   |
| Total:              |           |                    | 32.162       | 167.098    | 100.00          | 100.00            |        |

8: HPLC (ADH, *n*-hexane/2-propanol = 90/10,  $v = 1.0$  mL/min,  $\lambda = 254$  nm)

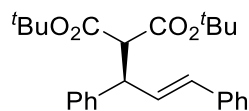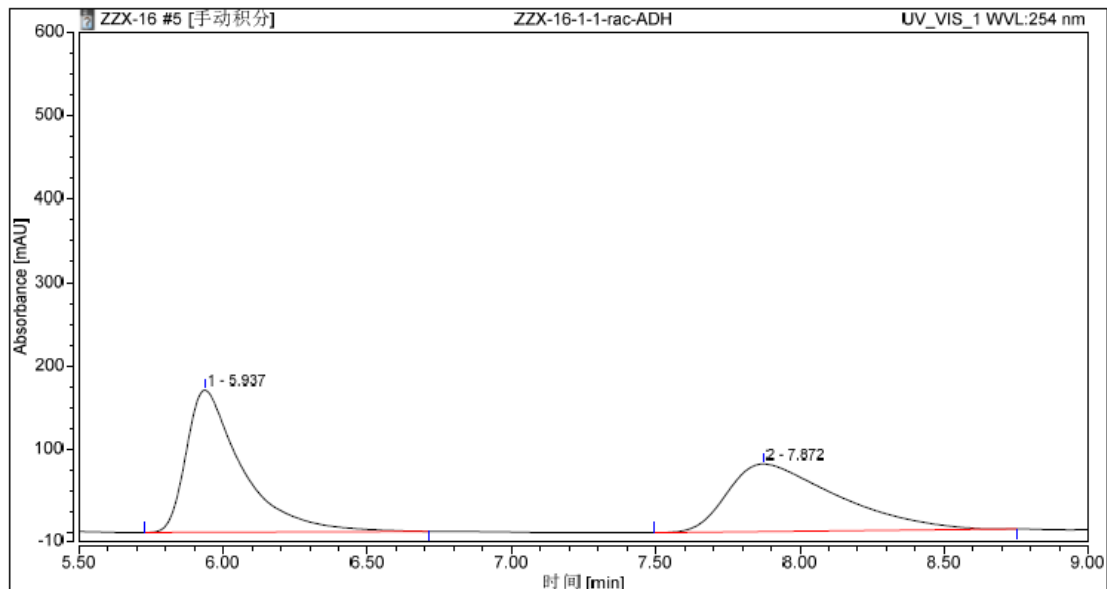

| Integration Results |           |                    |              |            |                 |                   |        |
|---------------------|-----------|--------------------|--------------|------------|-----------------|-------------------|--------|
| No.                 | Peak Name | Retention Time min | Area mAU*min | Height mAU | Relative Area % | Relative Height % | Amount |
| 1                   |           | 5.937              | 38.350       | 170.145    | 51.81           | 67.79             | n.a.   |
| 2                   |           | 7.872              | 35.674       | 80.838     | 48.19           | 32.21             | n.a.   |
| Total:              |           |                    | 74.024       | 250.982    | 100.00          | 100.00            |        |

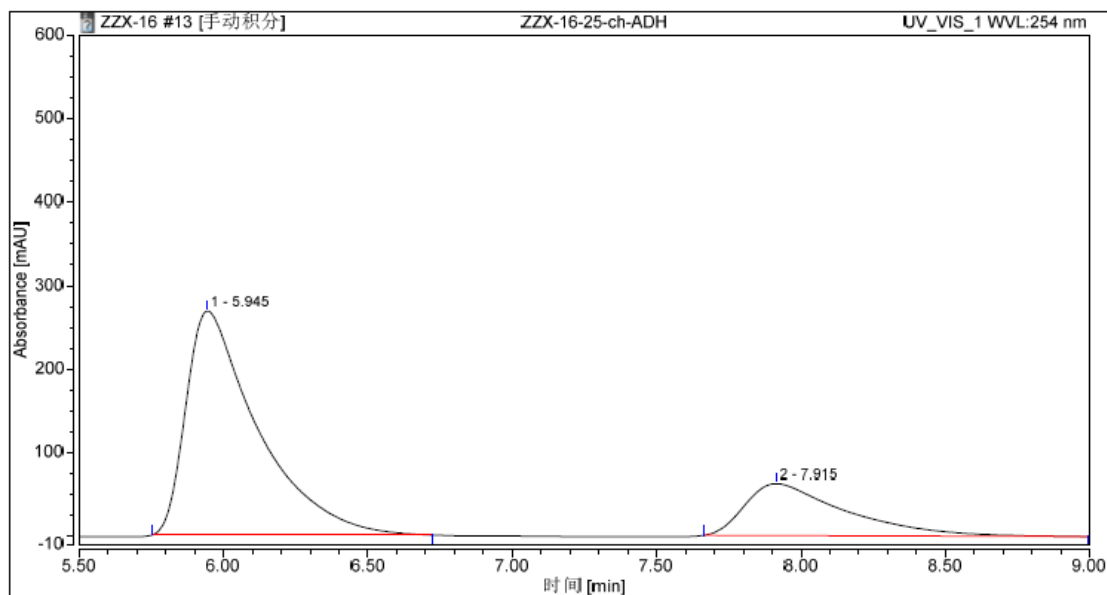

| Integration Results |           |                    |              |            |                 |                   |        |
|---------------------|-----------|--------------------|--------------|------------|-----------------|-------------------|--------|
| No.                 | Peak Name | Retention Time min | Area mAU*min | Height mAU | Relative Area % | Relative Height % | Amount |
| 1                   |           | 5.945              | 77.225       | 268.059    | 75.61           | 81.20             | n.a.   |
| 2                   |           | 7.915              | 24.911       | 62.046     | 24.39           | 18.80             | n.a.   |
| Total:              |           |                    | 102.135      | 330.105    | 100.00          | 100.00            |        |

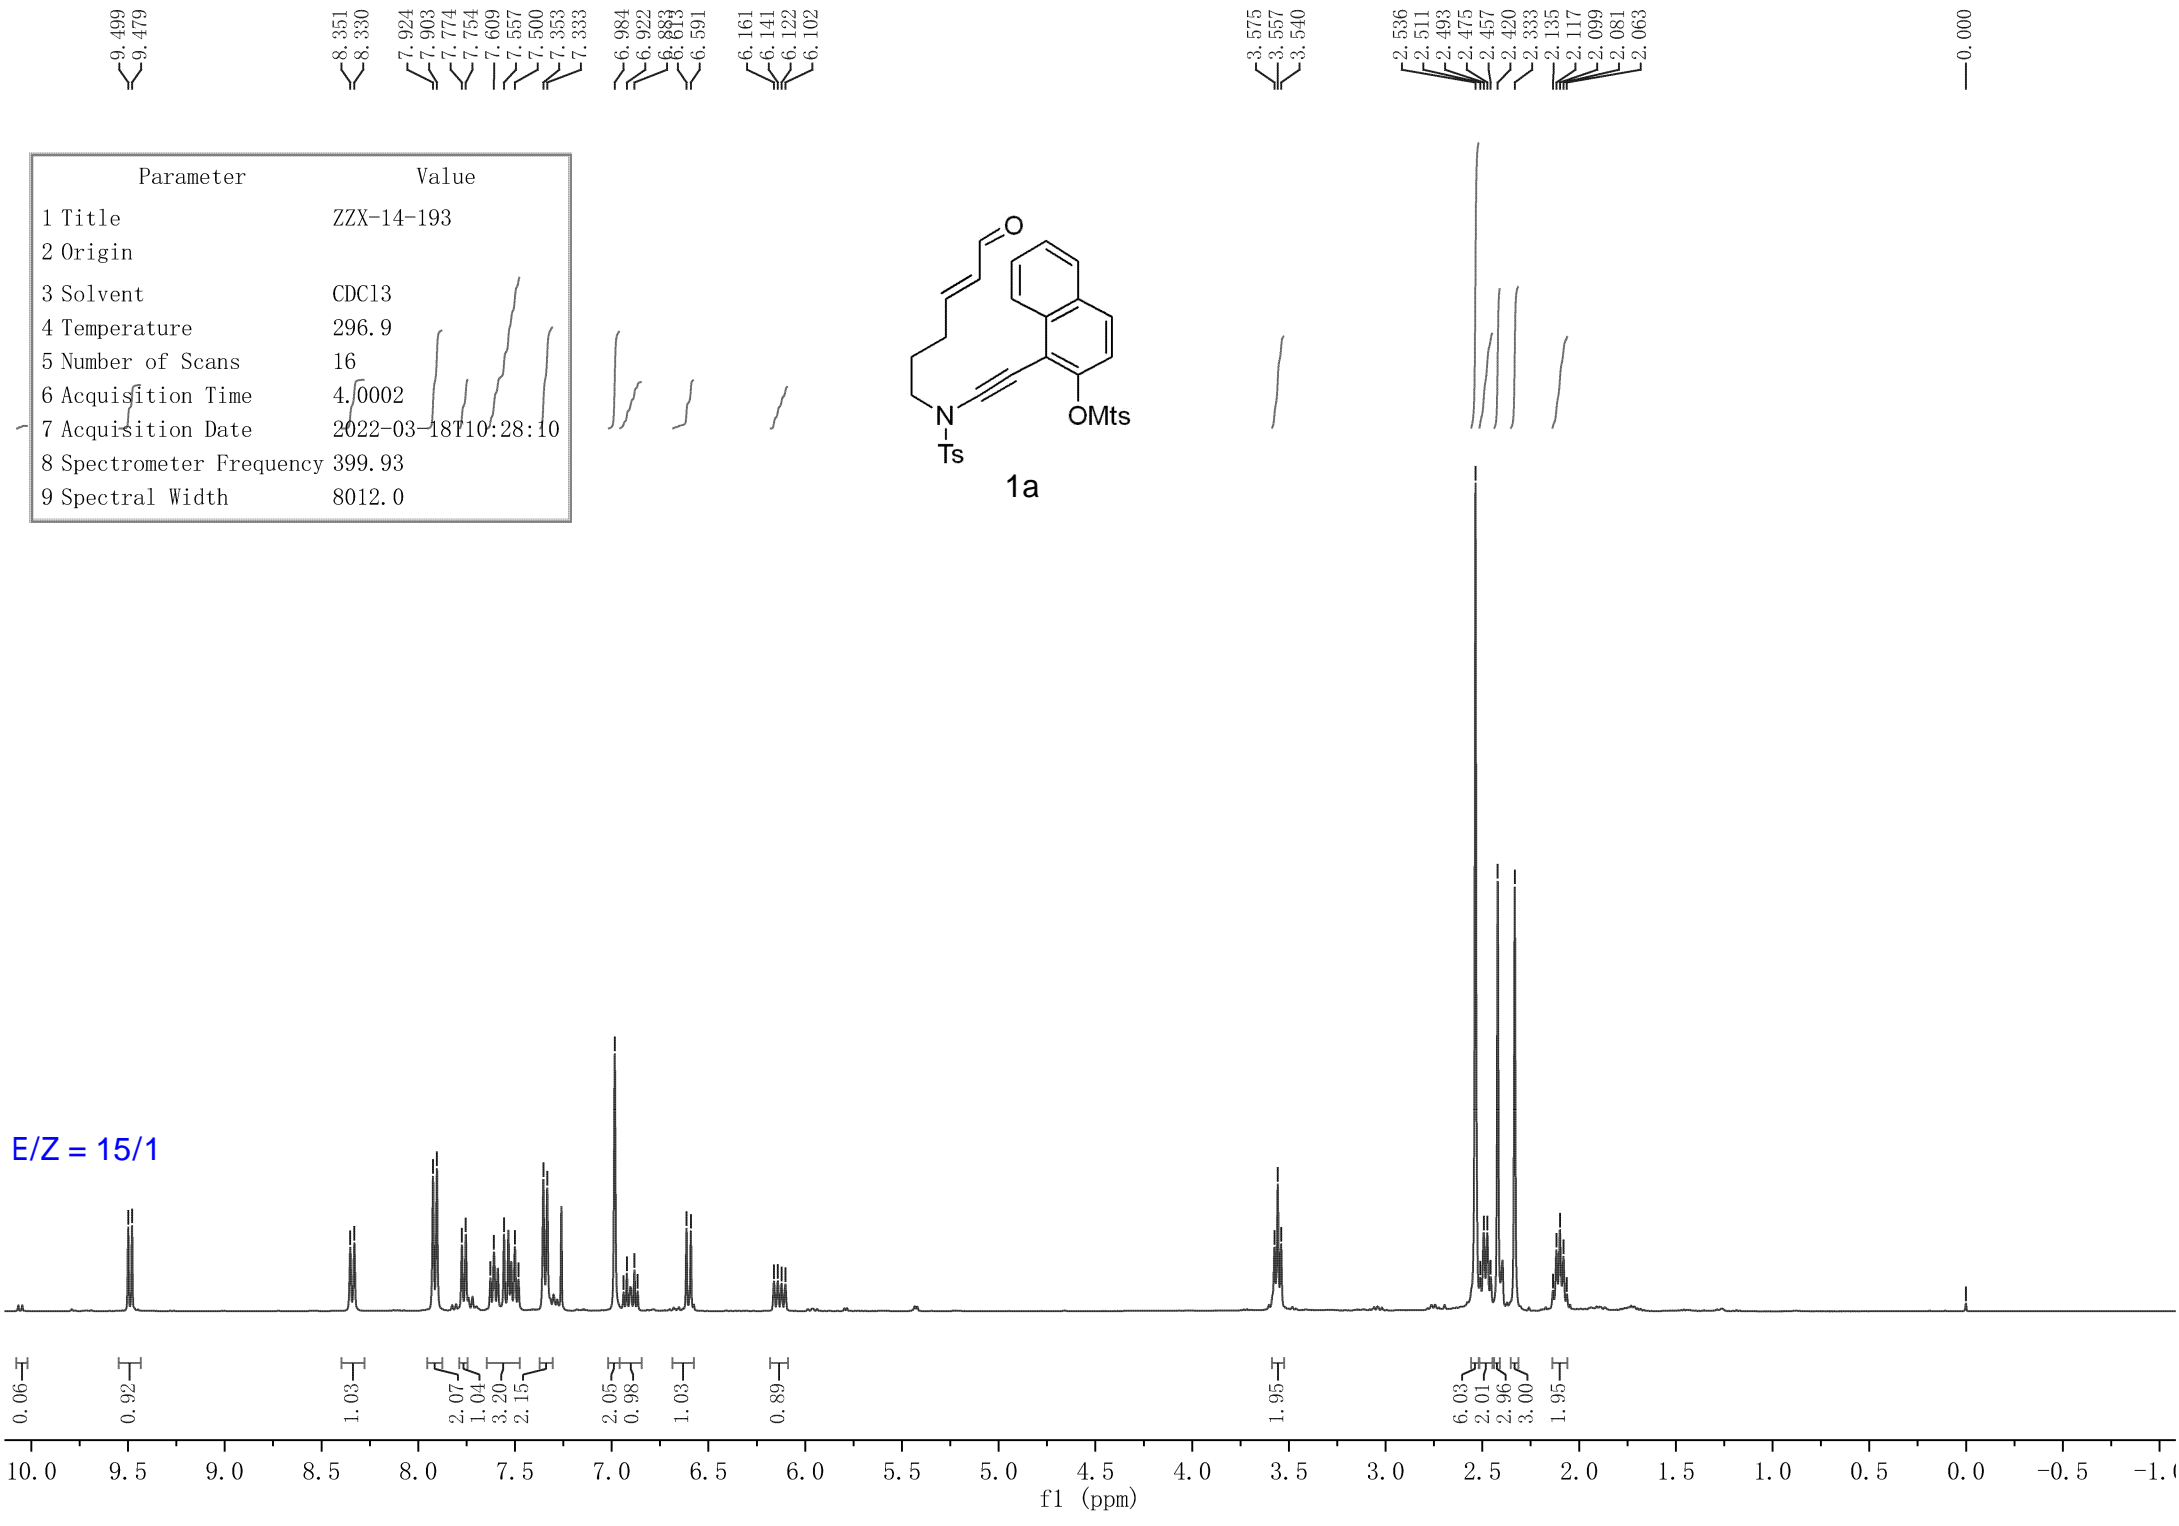

| Parameter                | Value               |
|--------------------------|---------------------|
| 1 Title                  | ZZX-14-193          |
| 2 Origin                 |                     |
| 3 Solvent                | CDCl3               |
| 4 Temperature            | 296.9               |
| 5 Number of Scans        | 16                  |
| 6 Acquisition Time       | 4.0002              |
| 7 Acquisition Date       | 2022-03-18T10:28:10 |
| 8 Spectrometer Frequency | 399.93              |
| 9 Spectral Width         | 8012.0              |

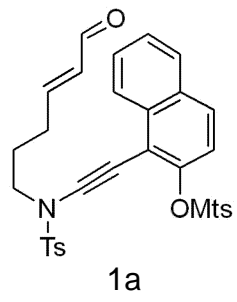

E/Z = 15/1



| Parameter                | Value               |
|--------------------------|---------------------|
| 1 Title                  | ZZX-14-193          |
| 2 Origin                 |                     |
| 3 Solvent                | CDC13               |
| 4 Temperature            | 297.2               |
| 5 Number of Scans        | 200                 |
| 6 Acquisition Time       | 1.0000              |
| 7 Acquisition Date       | 2022-03-18T10:35:25 |
| 8 Spectrometer Frequency | 100.56              |
| 9 Spectral Width         | 26041.0             |

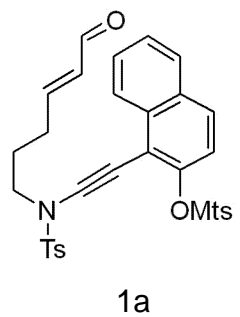

- 193.95
- 157.18
- 147.23
- 144.89
- 143.86
- 139.99
- 133.26
- 131.79
- 129.92
- 127.94
- 127.56
- 127.48
- 126.68
- 115.23
- 92.11
- 77.32
- 77.00
- 76.68
- 65.24
- 134.42
- 50.85
- 133.51
- 133.26
- 131.79
- 131.67
- 131.23
- 29.30
- 25.94
- 22.62
- 21.50
- 20.99
- 129.92
- 128.45
- 127.94
- 127.56
- 127.48
- 126.59
- 126.41

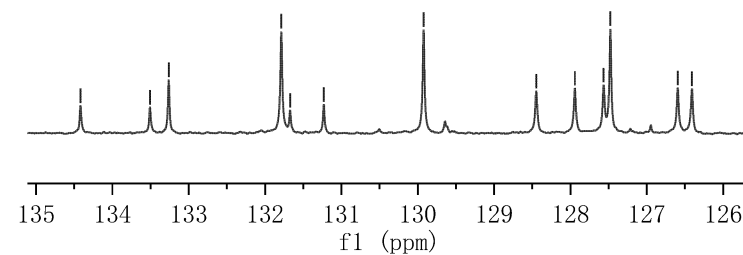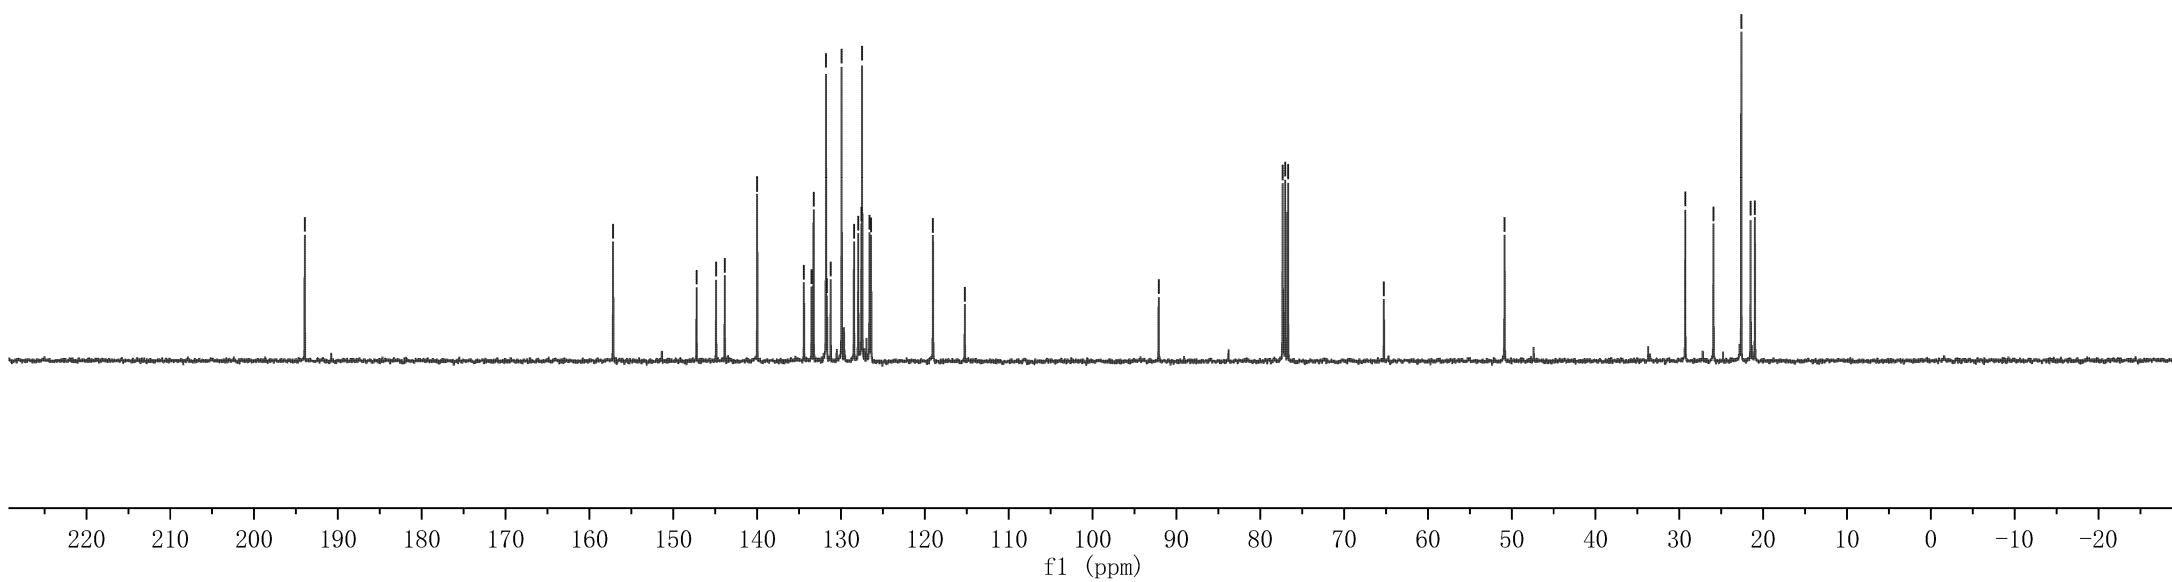

9.501  
9.481

8.340  
8.319

7.972  
7.949

7.775  
7.754

7.607  
7.589

7.556  
7.534

7.017  
6.995

6.988  
6.883

6.822  
6.600

6.164  
6.145

6.125  
6.105

3.845

3.569  
3.551

3.534

2.540

2.515  
2.495

2.478  
2.458

2.336  
2.133

2.116  
2.097

2.079  
2.061

0.000

| Parameter                | Value               |
|--------------------------|---------------------|
| 1 Title                  | zzx-16-61-H         |
| 2 Origin                 | Bruker BioSpin GmbH |
| 3 Solvent                | CDC13               |
| 4 Temperature            | 298.0               |
| 5 Number of Scans        | 5                   |
| 6 Acquisition Time       | 4.0894              |
| 7 Acquisition Date       | 2022-06-29T09:43:17 |
| 8 Spectrometer Frequency | 400.13              |
| 9 Spectral Width         | 8012.8              |

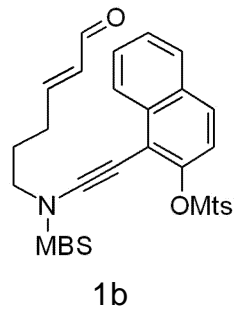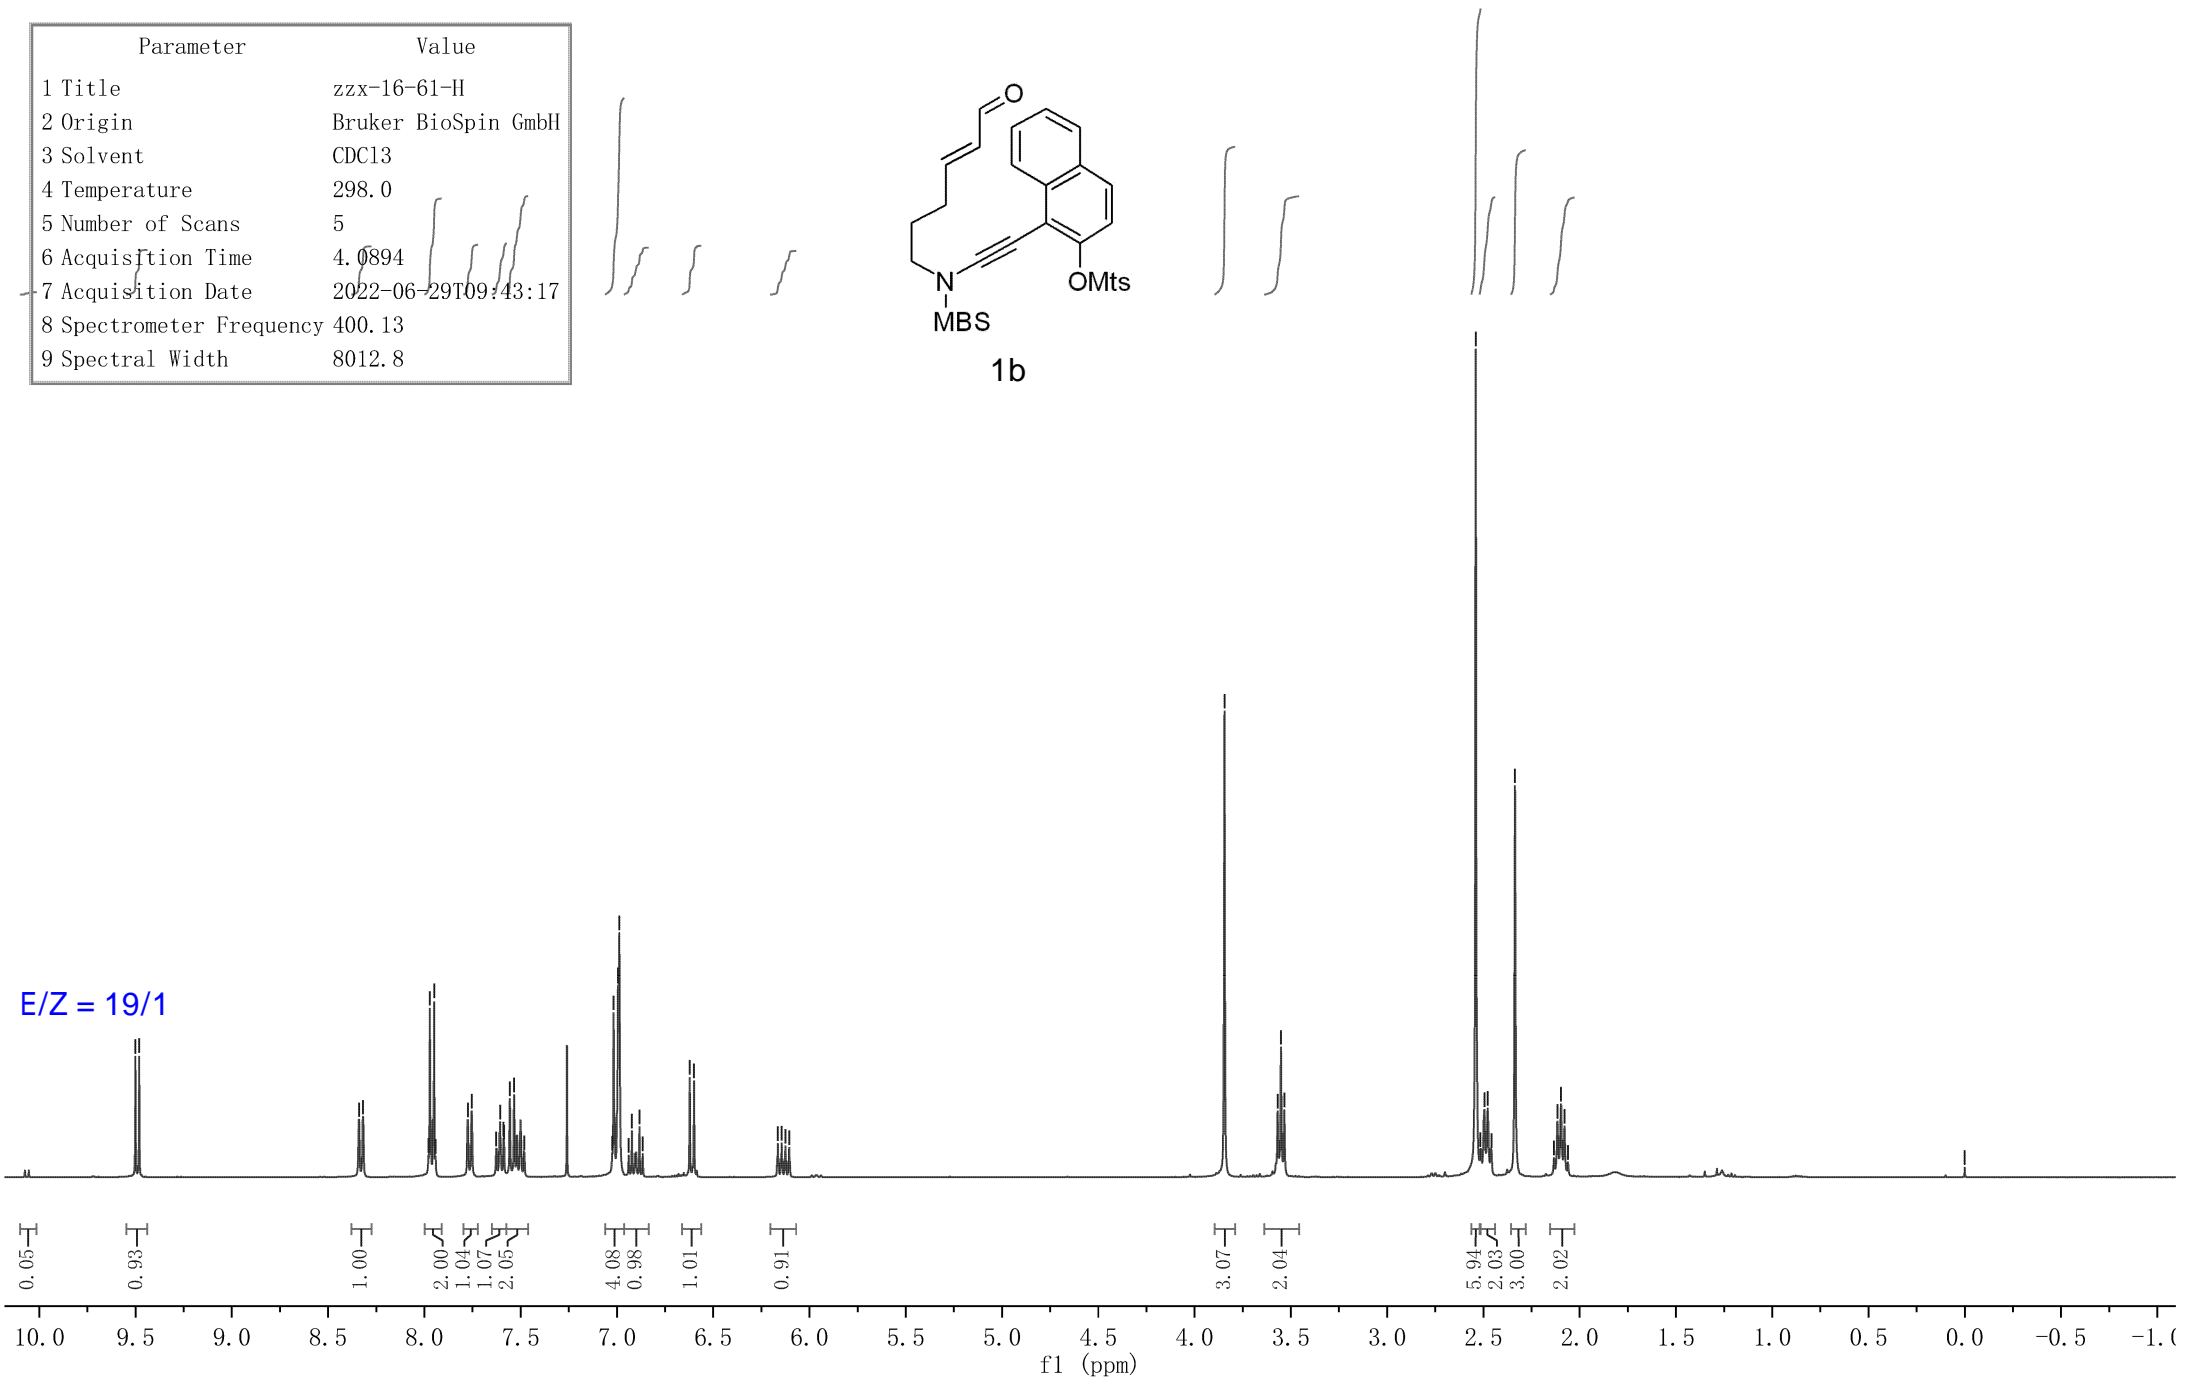

| Parameter                | Value               |
|--------------------------|---------------------|
| 1 Title                  | zzx-16-61-C         |
| 2 Origin                 | Bruker BioSpin GmbH |
| 3 Solvent                | CDC13               |
| 4 Temperature            | 300.0               |
| 5 Number of Scans        | 27                  |
| 6 Acquisition Time       | 1.3631              |
| 7 Acquisition Date       | 2022-06-29T09:45:27 |
| 8 Spectrometer Frequency | 100.61              |
| 9 Spectral Width         | 24038.5             |

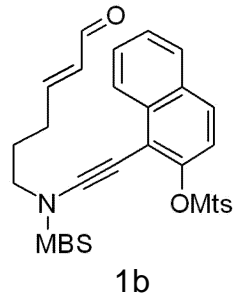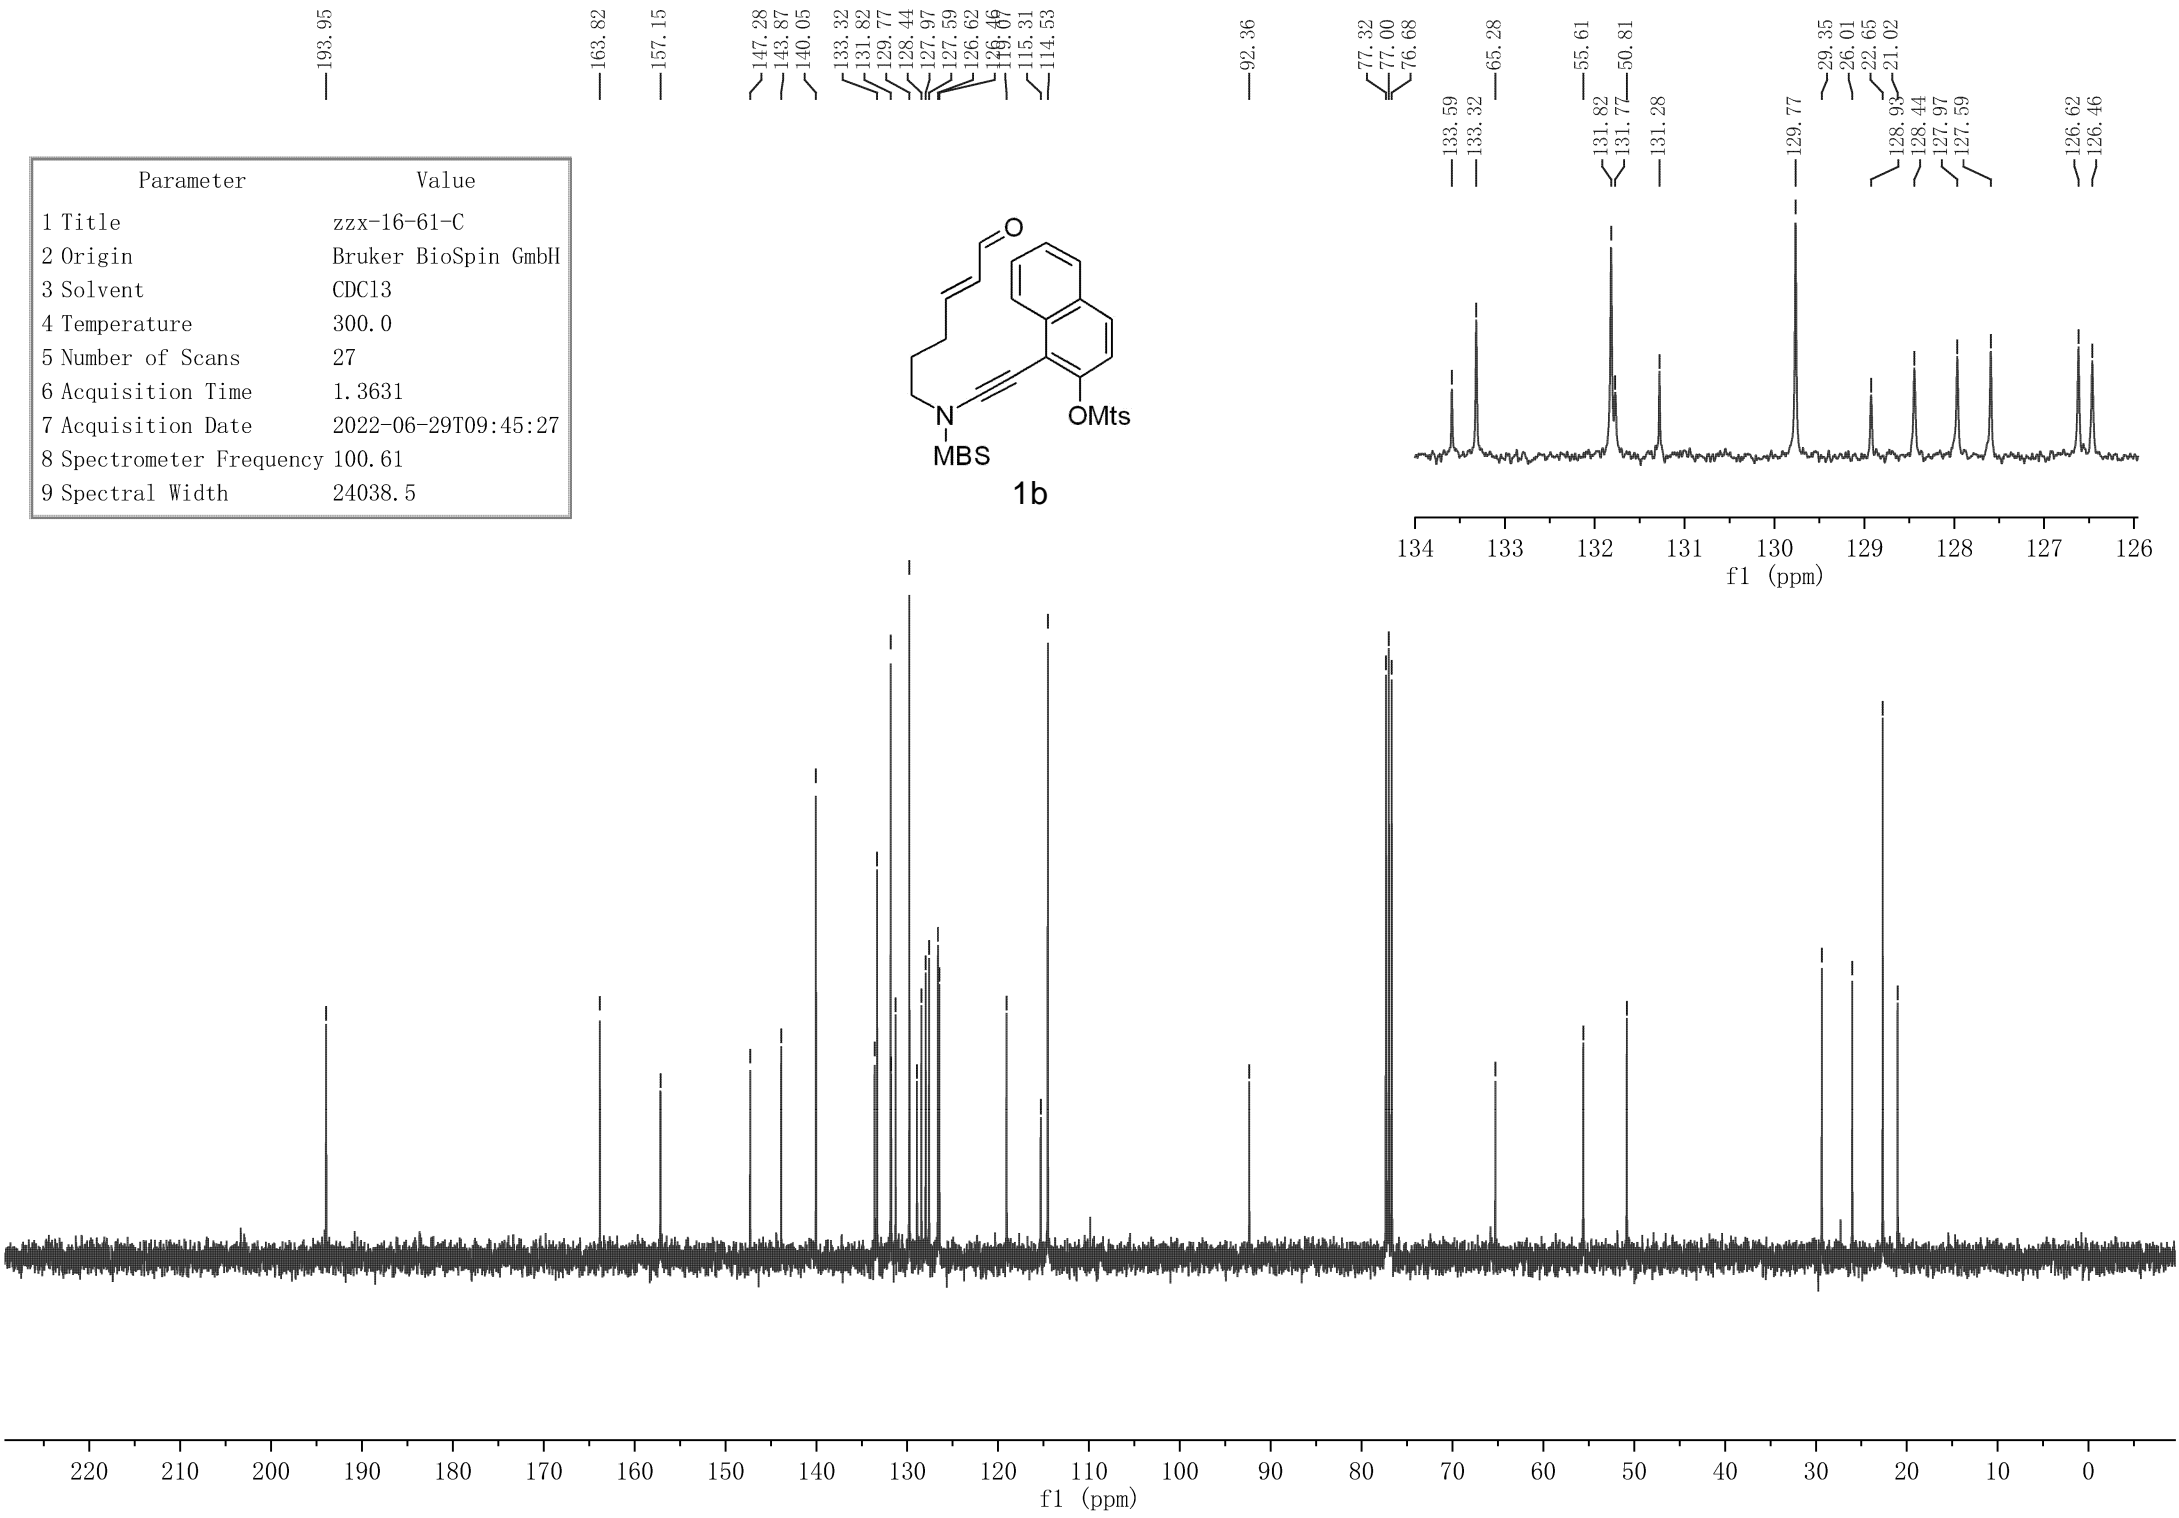

9.493  
9.474

7.816  
7.796  
7.730  
7.711  
7.516  
7.494  
7.473  
7.456  
7.410  
7.390

7.032  
7.001  
6.912  
6.873  
6.859  
6.585

6.156  
6.136  
6.116  
6.097

3.667  
3.650  
3.632

2.703  
2.559  
2.537  
2.516  
2.498  
2.482  
2.351  
2.342  
2.230  
2.211  
2.193  
2.175  
2.157

0.000

| Parameter                | Value               |
|--------------------------|---------------------|
| 1 Title                  | zzx-16-60-H         |
| 2 Origin                 | Bruker BioSpin GmbH |
| 3 Solvent                | CDC13               |
| 4 Temperature            | 298.0               |
| 5 Number of Scans        | 5                   |
| 6 Acquisition Time       | 4.0894              |
| 7 Acquisition Date       | 2022-06-29T09:48:47 |
| 8 Spectrometer Frequency | 400.13              |
| 9 Spectral Width         | 8012.8              |

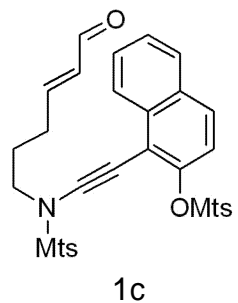

E/Z > 20/1

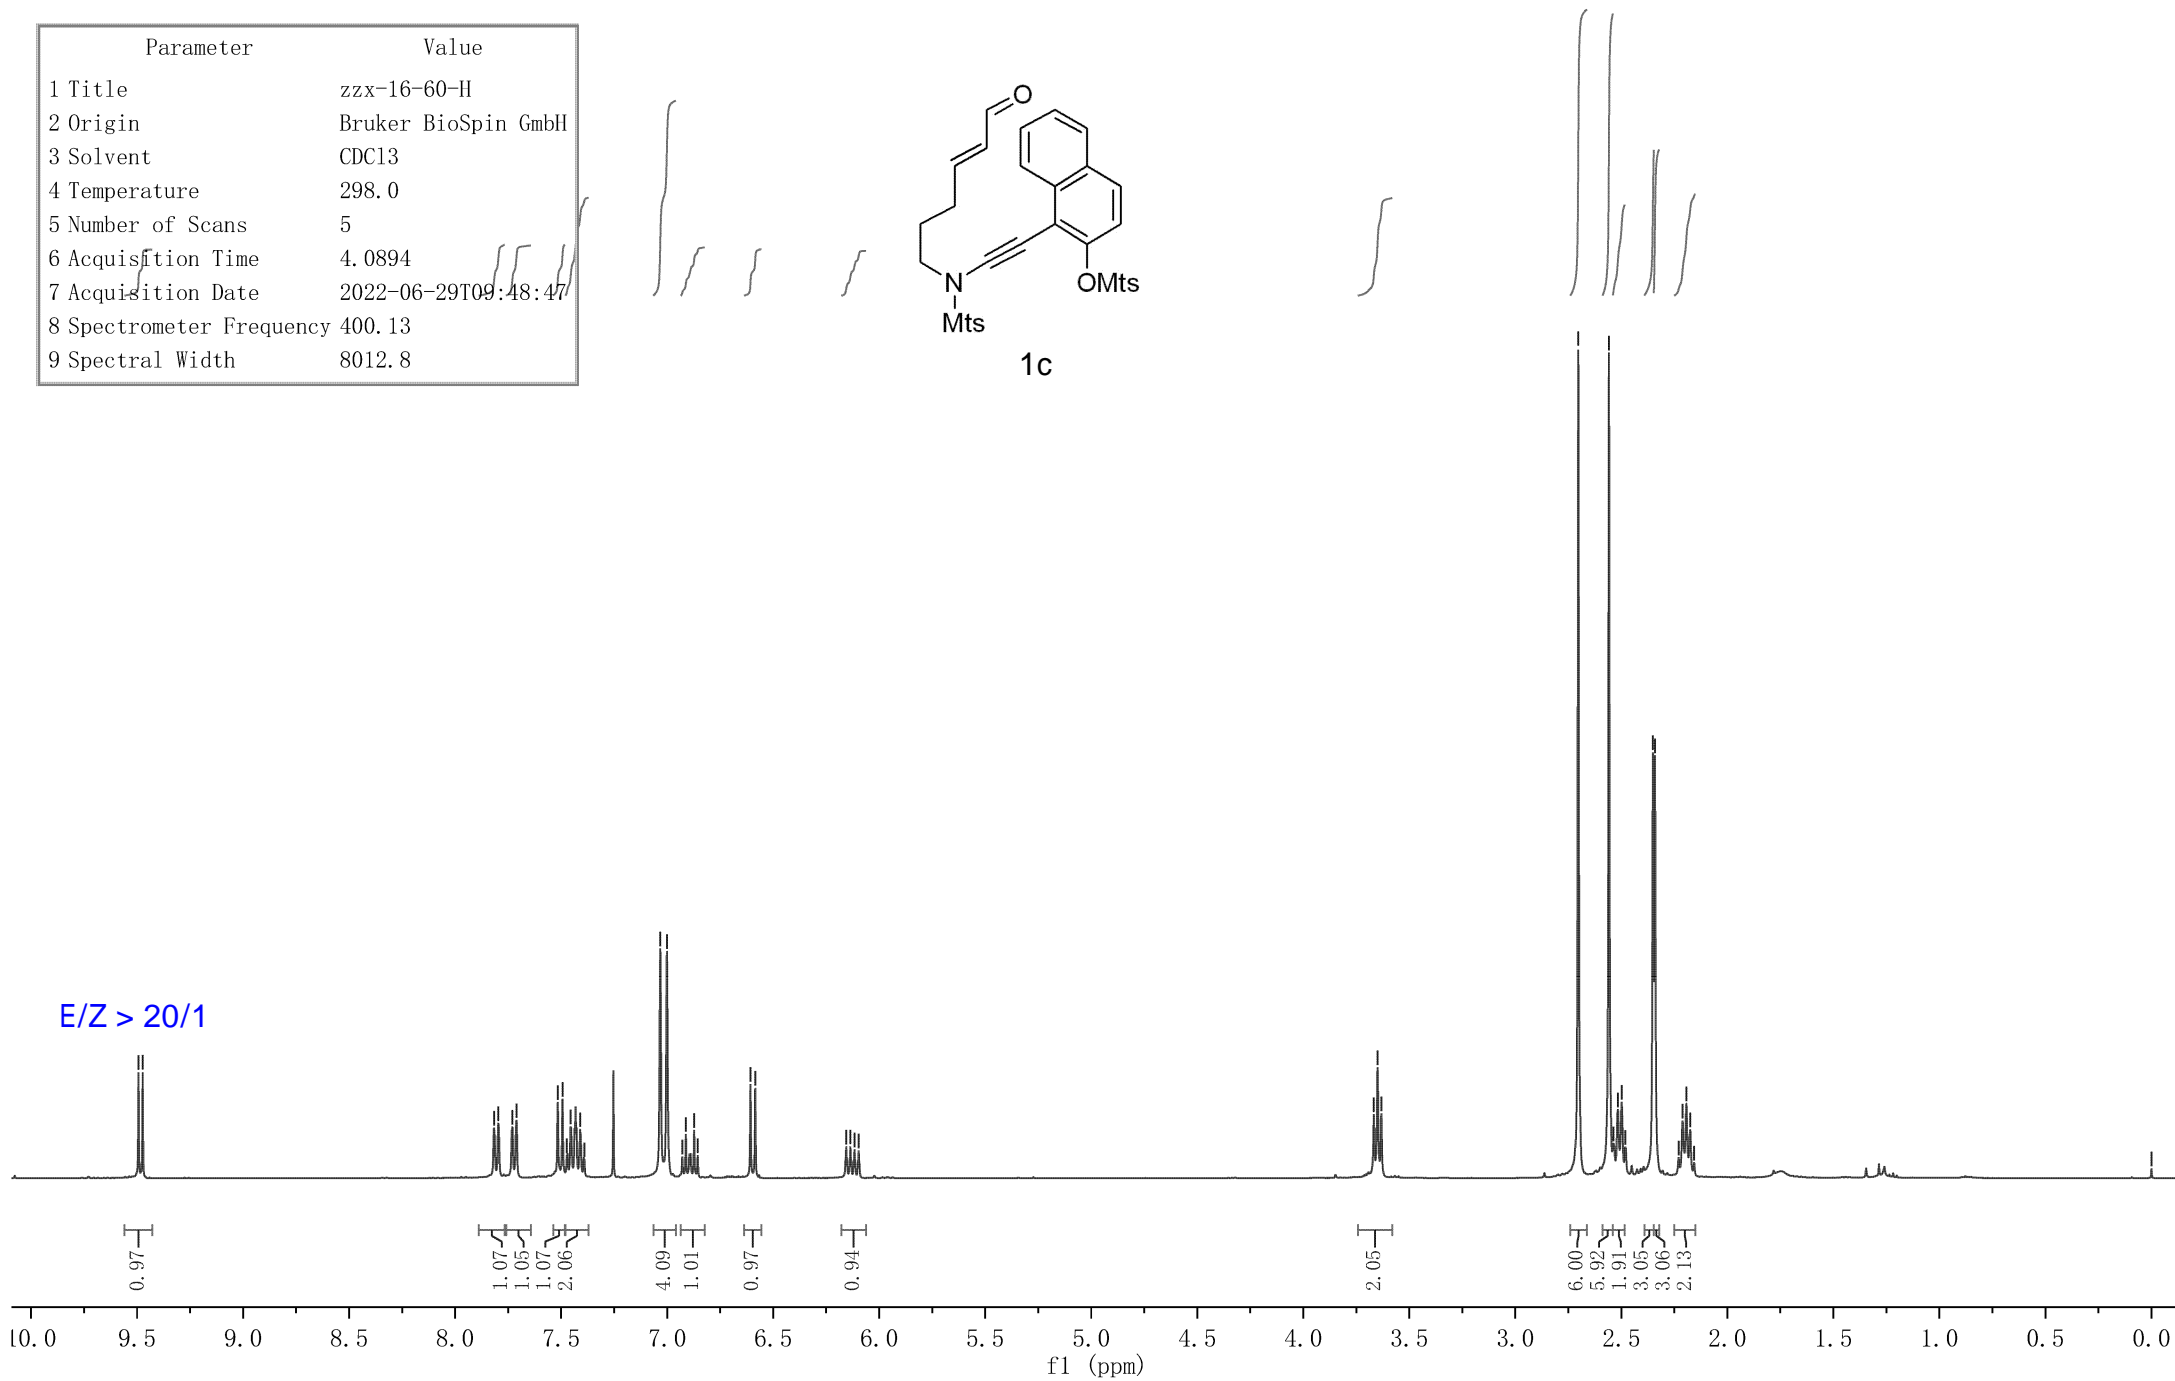

| Parameter                | Value               |
|--------------------------|---------------------|
| 1 Title                  | zzx-16-60-C         |
| 2 Origin                 | Bruker BioSpin GmbH |
| 3 Solvent                | CDC13               |
| 4 Temperature            | 300.0               |
| 5 Number of Scans        | 18                  |
| 6 Acquisition Time       | 1.3631              |
| 7 Acquisition Date       | 2022-06-29T09:49:54 |
| 8 Spectrometer Frequency | 100.61              |
| 9 Spectral Width         | 24038.5             |

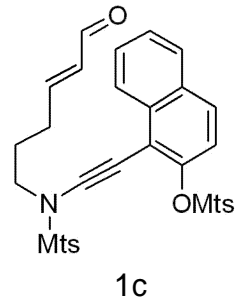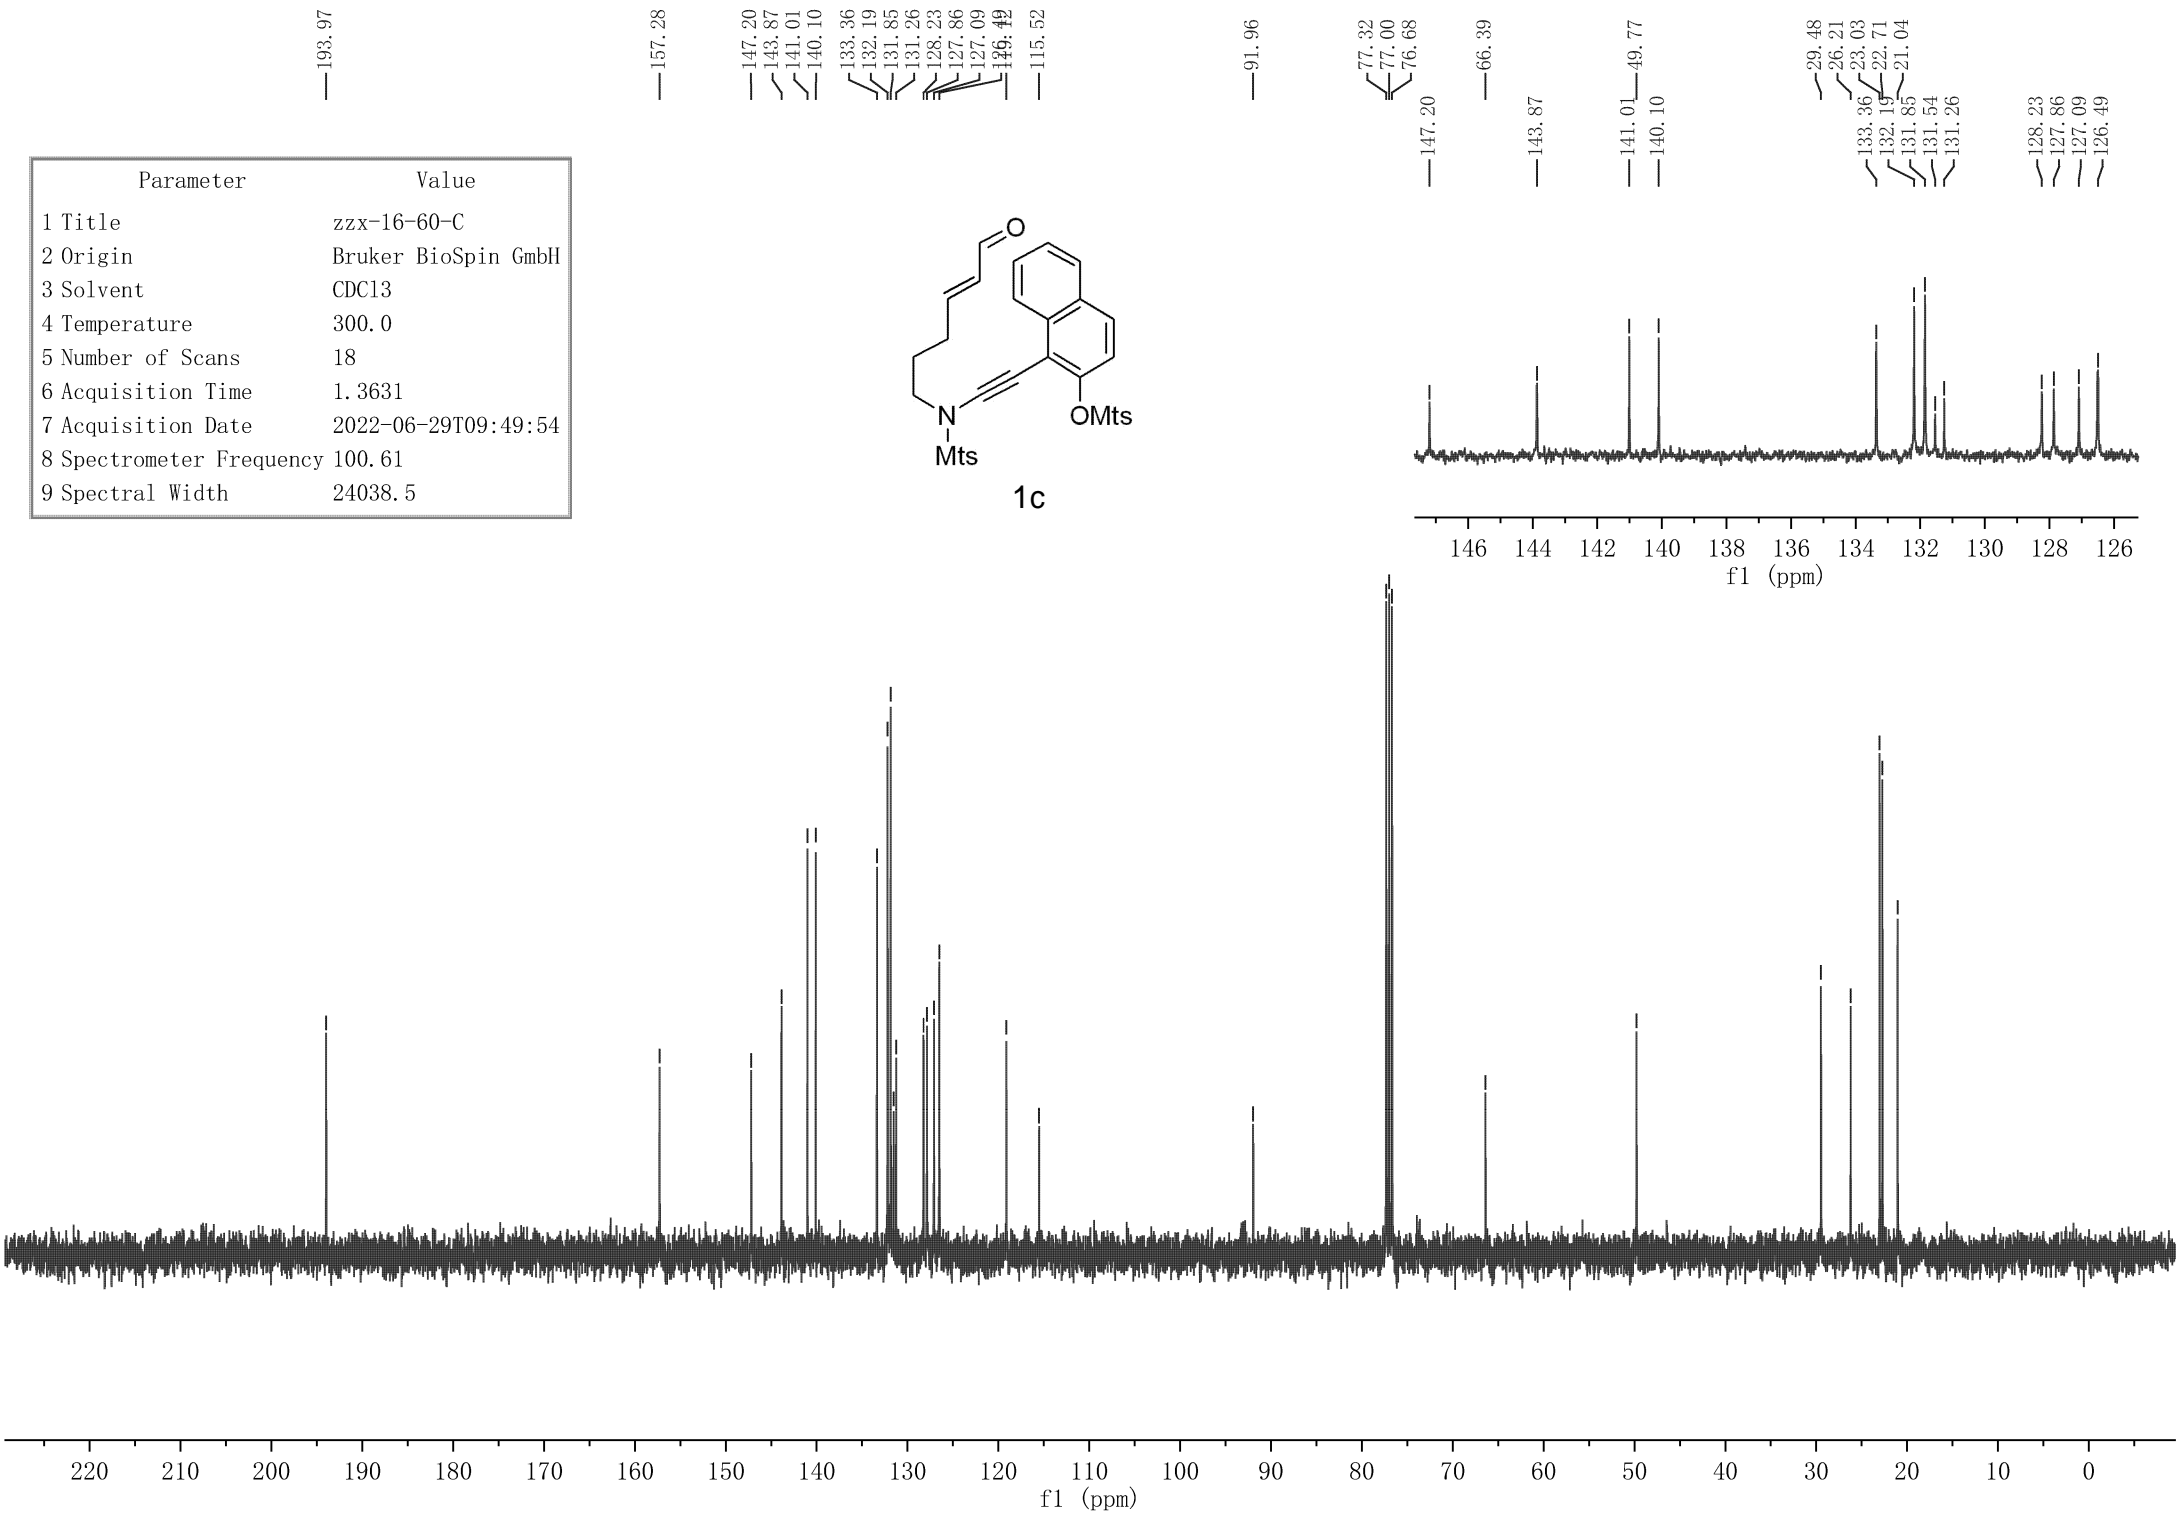

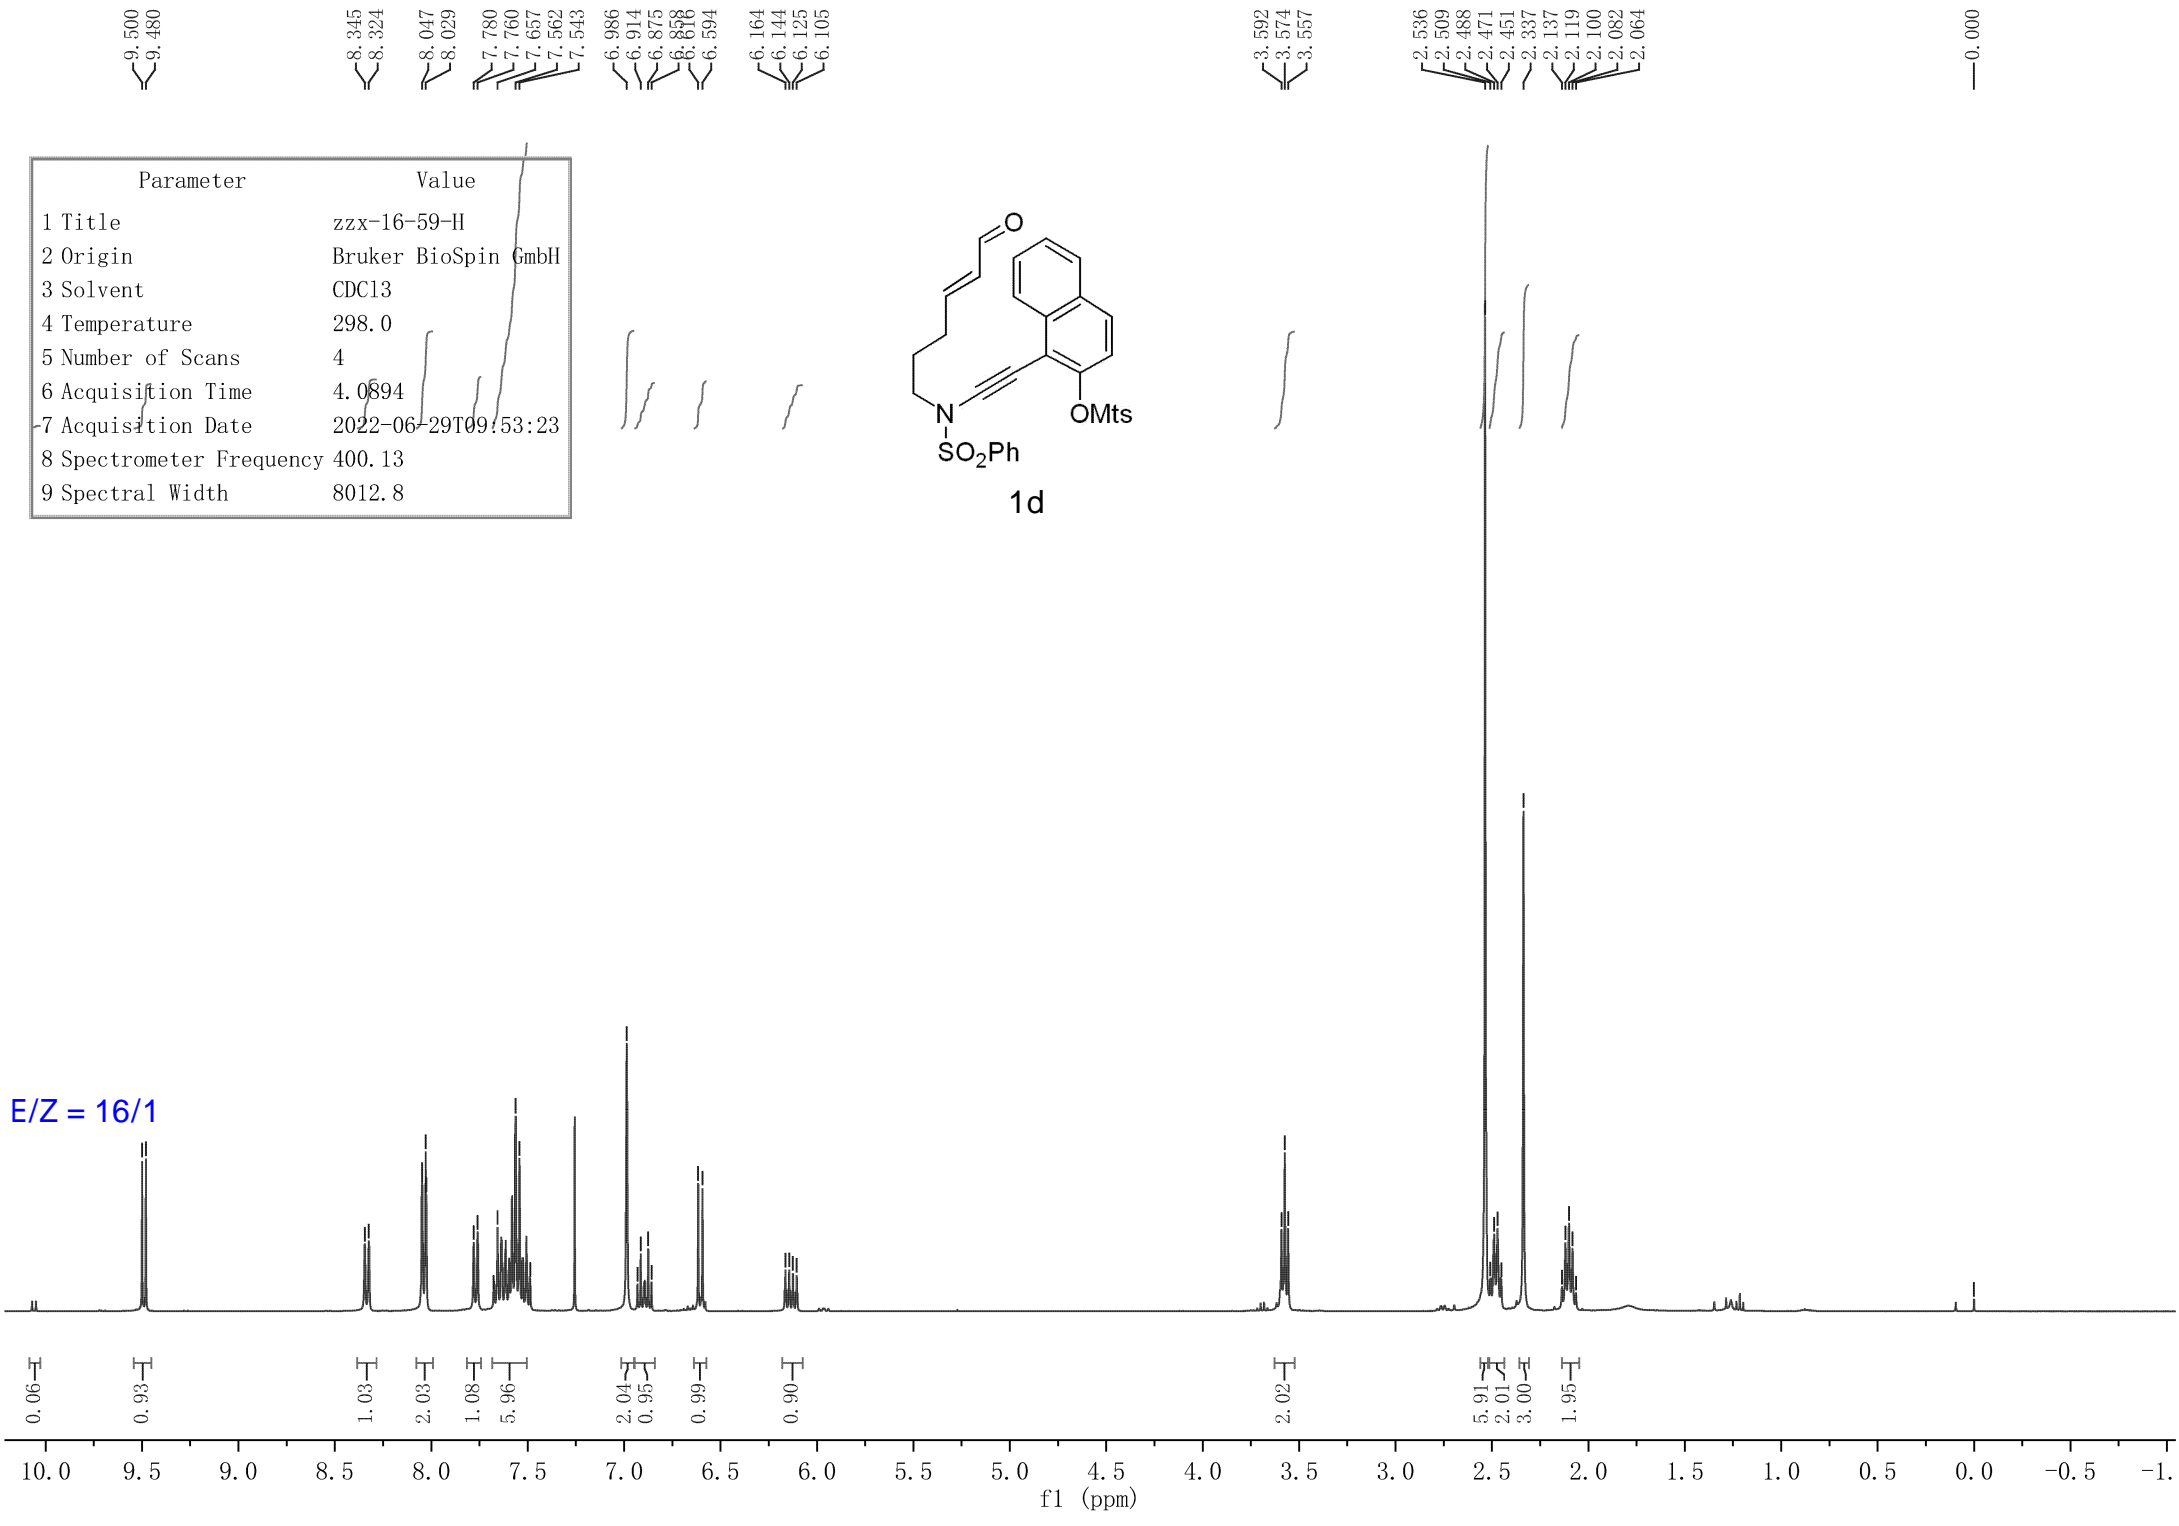

| Parameter                | Value               |
|--------------------------|---------------------|
| 1 Title                  | zzx-16-59-H         |
| 2 Origin                 | Bruker BioSpin GmbH |
| 3 Solvent                | CDCl3               |
| 4 Temperature            | 298.0               |
| 5 Number of Scans        | 4                   |
| 6 Acquisition Time       | 4.0894              |
| 7 Acquisition Date       | 2022-06-29T09:53:23 |
| 8 Spectrometer Frequency | 400.13              |
| 9 Spectral Width         | 8012.8              |

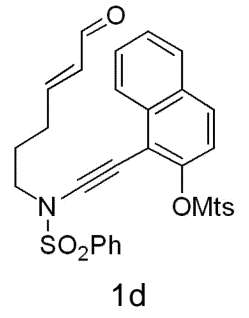

E/Z = 16/1

9.500  
9.480

8.345  
8.324  
8.047  
8.029  
7.780  
7.760  
7.657  
7.562  
7.543

6.986  
6.914  
6.875  
6.858  
6.816  
6.594  
6.164  
6.144  
6.125  
6.105

3.592  
3.574  
3.557

2.536  
2.509  
2.488  
2.471  
2.451  
2.337  
2.137  
2.119  
2.100  
2.082  
2.064

0.000

0.06  
0.93  
1.03  
2.03  
1.08  
5.96  
2.04  
0.95  
0.99  
0.90  
2.02  
5.91  
2.01  
3.00  
1.95

10.0 9.5 9.0 8.5 8.0 7.5 7.0 6.5 6.0 5.5 5.0 4.5 4.0 3.5 3.0 2.5 2.0 1.5 1.0 0.5 0.0 -0.5 -1.0

f1 (ppm)

| Parameter                | Value               |
|--------------------------|---------------------|
| 1 Title                  | zzx-16-59-C         |
| 2 Origin                 | Bruker BioSpin GmbH |
| 3 Solvent                | CDC13               |
| 4 Temperature            | 300.0               |
| 5 Number of Scans        | 16                  |
| 6 Acquisition Time       | 1.3631              |
| 7 Acquisition Date       | 2022-06-29T09:54:24 |
| 8 Spectrometer Frequency | 100.61              |
| 9 Spectral Width         | 24038.5             |

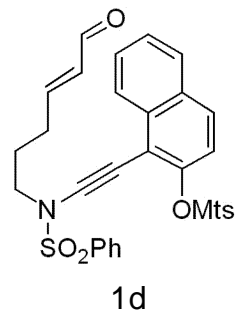

— 193.96

— 157.05  
 147.40  
 143.89  
 140.08  
 133.83  
 133.61  
 133.36  
 131.83  
 131.30  
 129.38  
 128.59  
 127.99  
 127.68  
 127.49  
 126.66  
 126.45  
 115.22

— 91.92

77.32  
 77.00  
 76.68

133.83  
 133.61  
 133.36

51.01  
 131.83  
 131.77  
 131.30

29.33  
 26.02  
 22.67  
 21.04

129.38  
 128.59  
 127.99  
 127.68  
 127.49  
 126.66  
 126.45

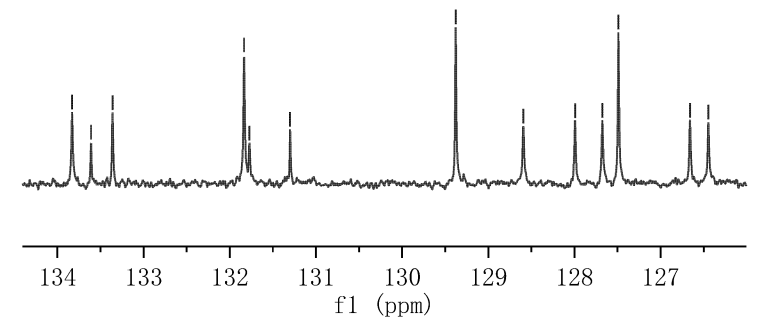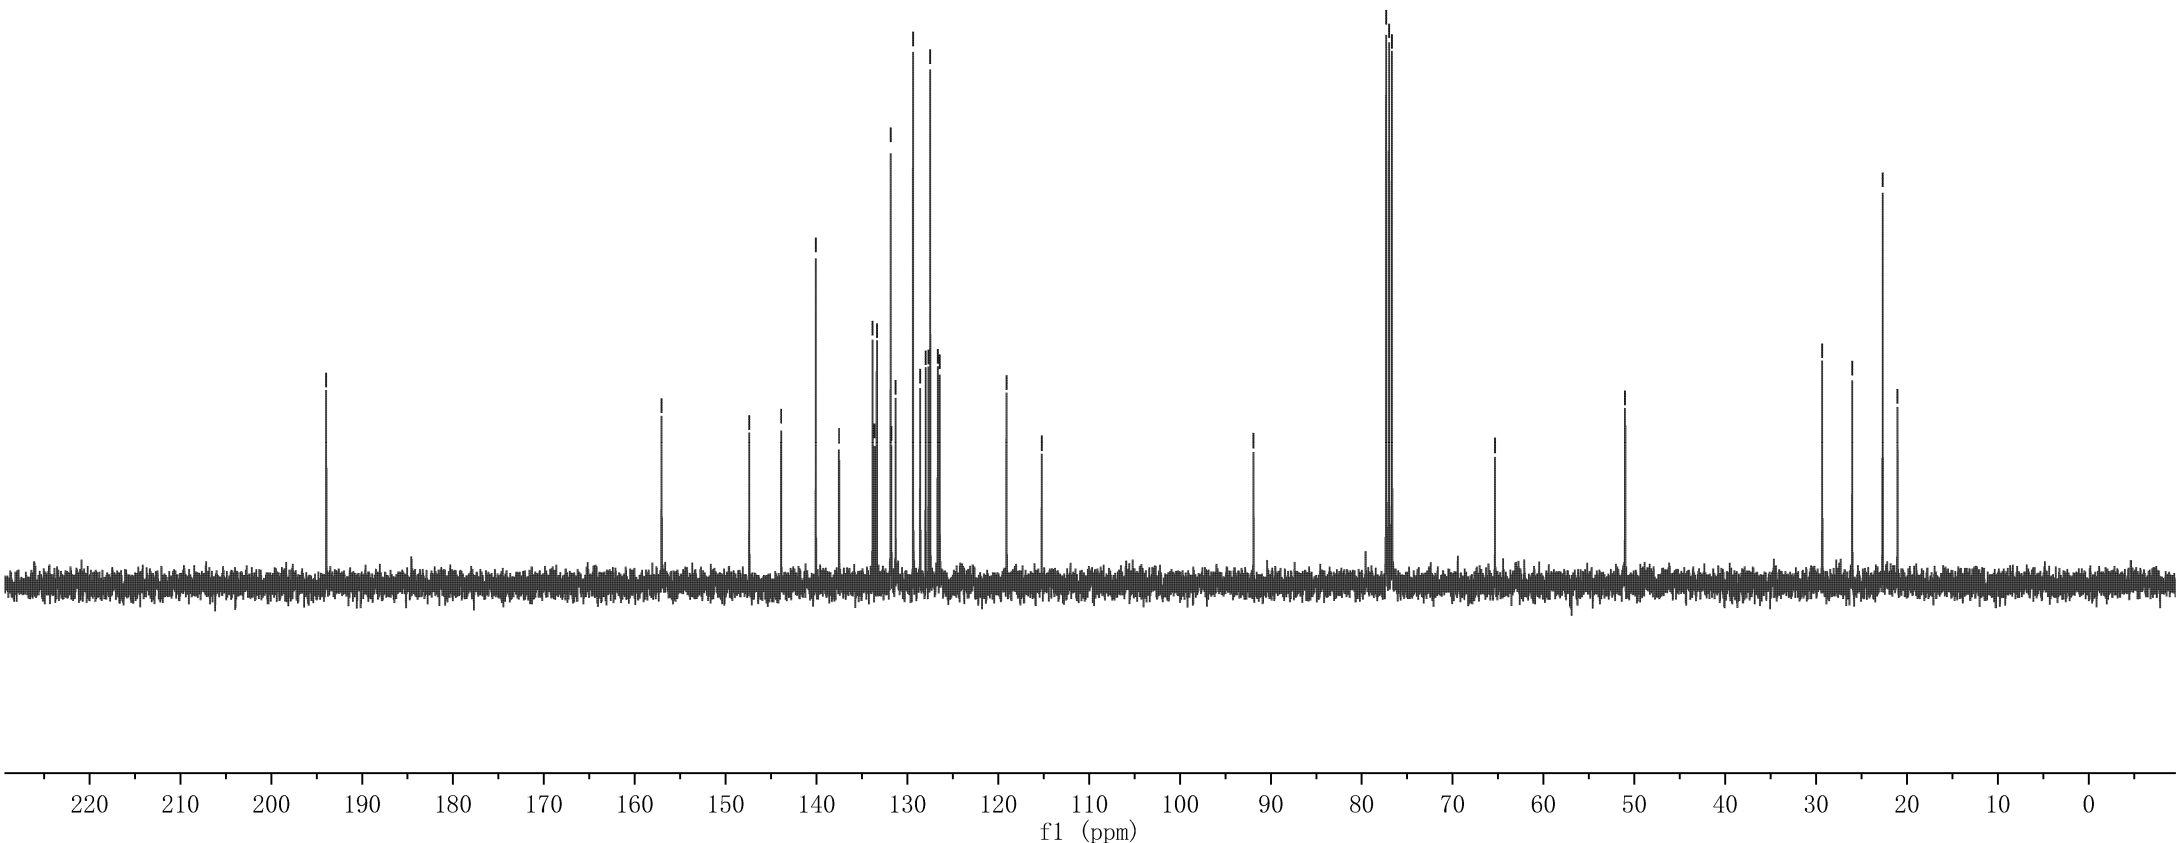

9.511  
9.491

8.297  
8.276  
7.912  
7.890  
7.789  
7.768  
7.713  
7.692  
7.625  
7.517

7.001  
6.927  
6.888  
6.871  
6.858  
6.565  
6.189  
6.169  
6.149  
6.130

3.596  
3.579  
3.561

2.541  
2.518  
2.499  
2.481  
2.349  
2.191  
2.142  
2.124  
2.087

0.000

| Parameter                | Value               |
|--------------------------|---------------------|
| 1 Title                  | ZZX-10-191          |
| 2 Origin                 |                     |
| 3 Solvent                | CDC13               |
| 4 Temperature            | 296.9               |
| 5 Number of Scans        | 16                  |
| 6 Acquisition Time       | 4.0002              |
| 7 Acquisition Date       | 2022-03-18T17:44:30 |
| 8 Spectrometer Frequency | 399.93              |
| 9 Spectral Width         | 8012.0              |

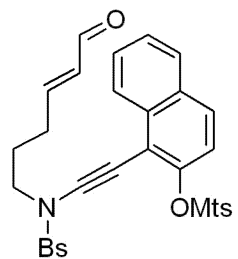

E/Z = 8/1

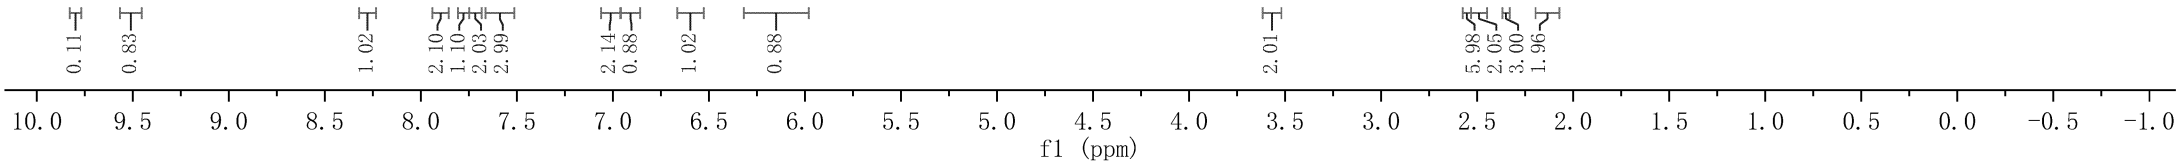



| Parameter                | Value               |
|--------------------------|---------------------|
| 1 Title                  | ZZX-10-191          |
| 2 Origin                 |                     |
| 3 Solvent                | CDC13               |
| 4 Temperature            | 297.3               |
| 5 Number of Scans        | 200                 |
| 6 Acquisition Time       | 1.0000              |
| 7 Acquisition Date       | 2022-03-18T17:51:44 |
| 8 Spectrometer Frequency | 100.56              |
| 9 Spectral Width         | 26041.0             |

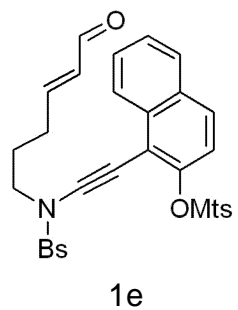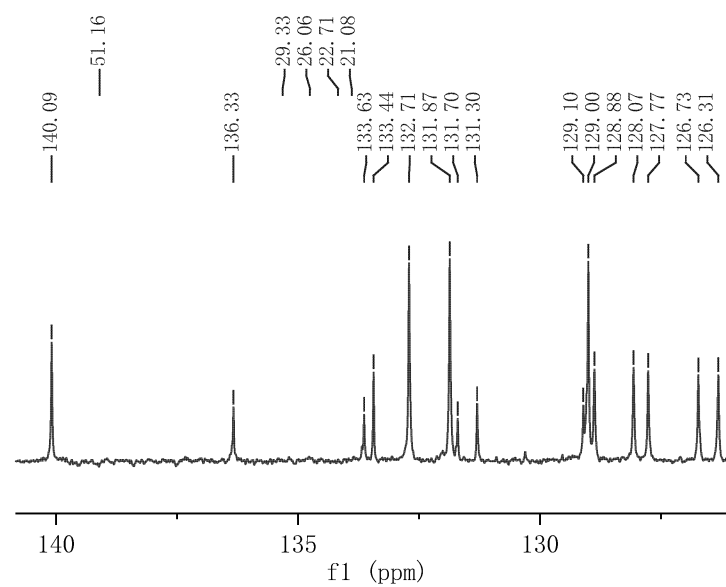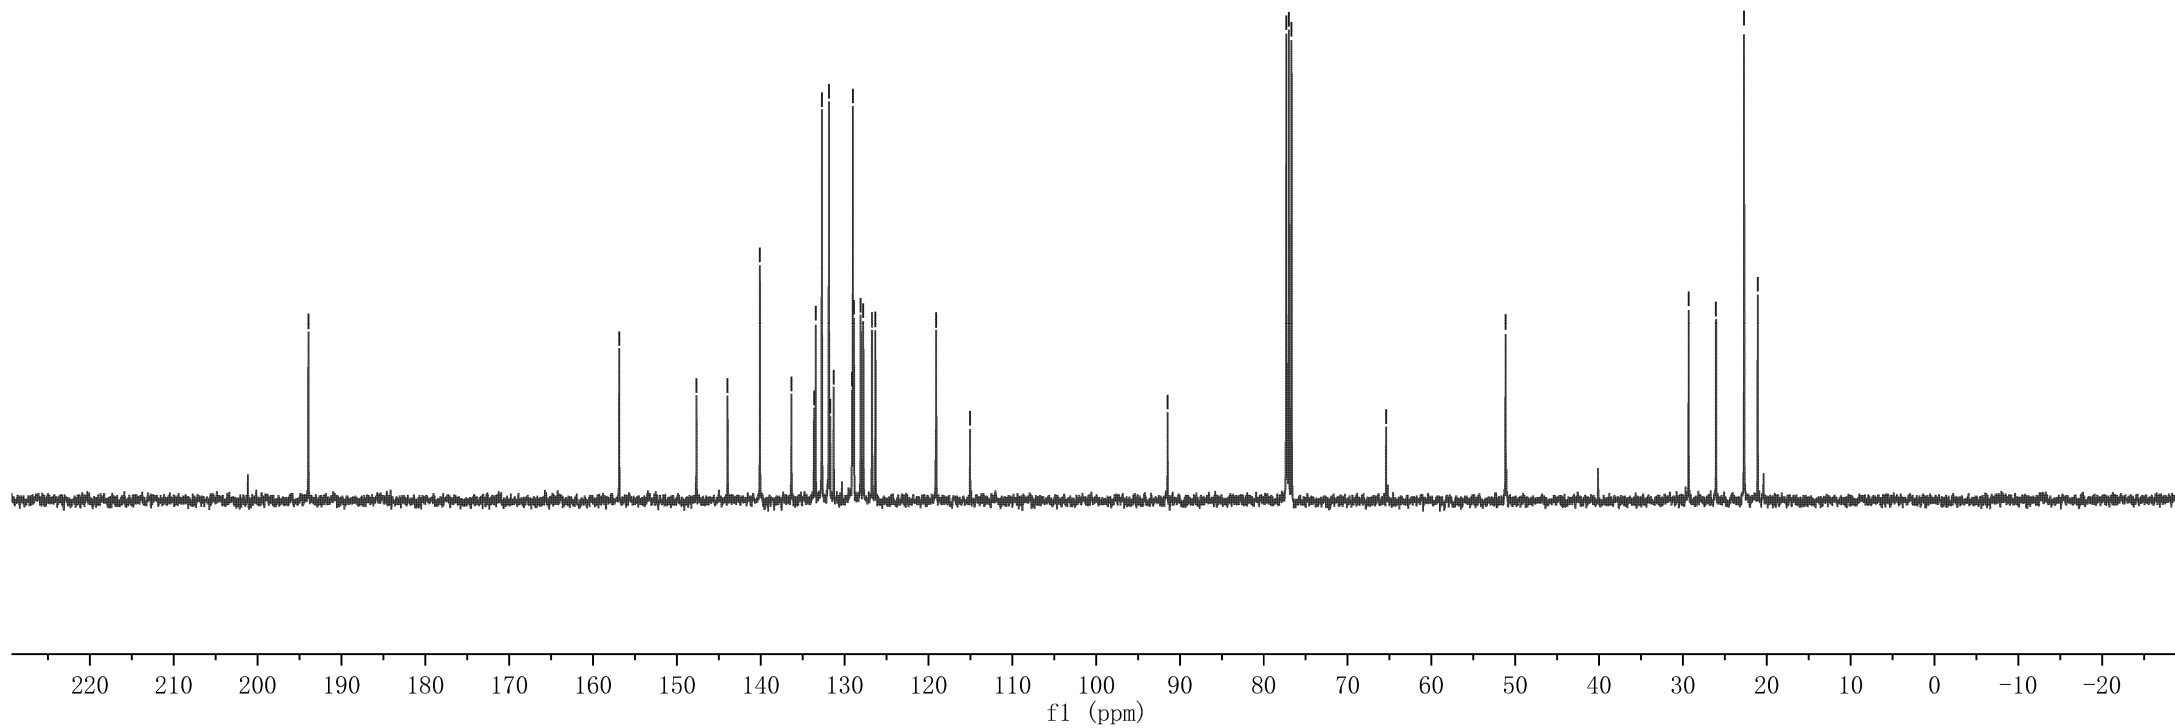

9.533  
9.531  
9.514  
9.512

8.304  
8.283

7.784  
7.763  
7.629  
7.557  
7.530  
7.493

6.984  
6.967  
6.928  
6.911

6.555  
6.533  
6.235  
6.213  
6.196  
6.173

3.759  
3.741  
3.724

3.268

2.597  
2.576  
2.563  
2.557  
2.543  
2.372  
2.237  
2.218  
2.200  
2.182  
2.164

0.000

| Parameter                | Value               |
|--------------------------|---------------------|
| 1 Title                  | ZZX-18-S-Ms         |
| 2 Origin                 |                     |
| 3 Solvent                | CDC13               |
| 4 Temperature            | 297.8               |
| 5 Number of Scans        | 16                  |
| 6 Acquisition Time       | 4.0002              |
| 7 Acquisition Date       | 2023-02-09T14:48:17 |
| 8 Spectrometer Frequency | 399.90              |
| 9 Spectral Width         | 8012.0              |

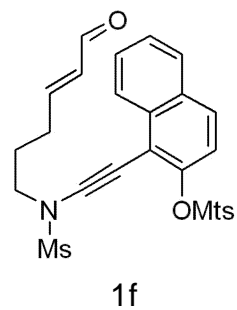

E/Z > 20/1

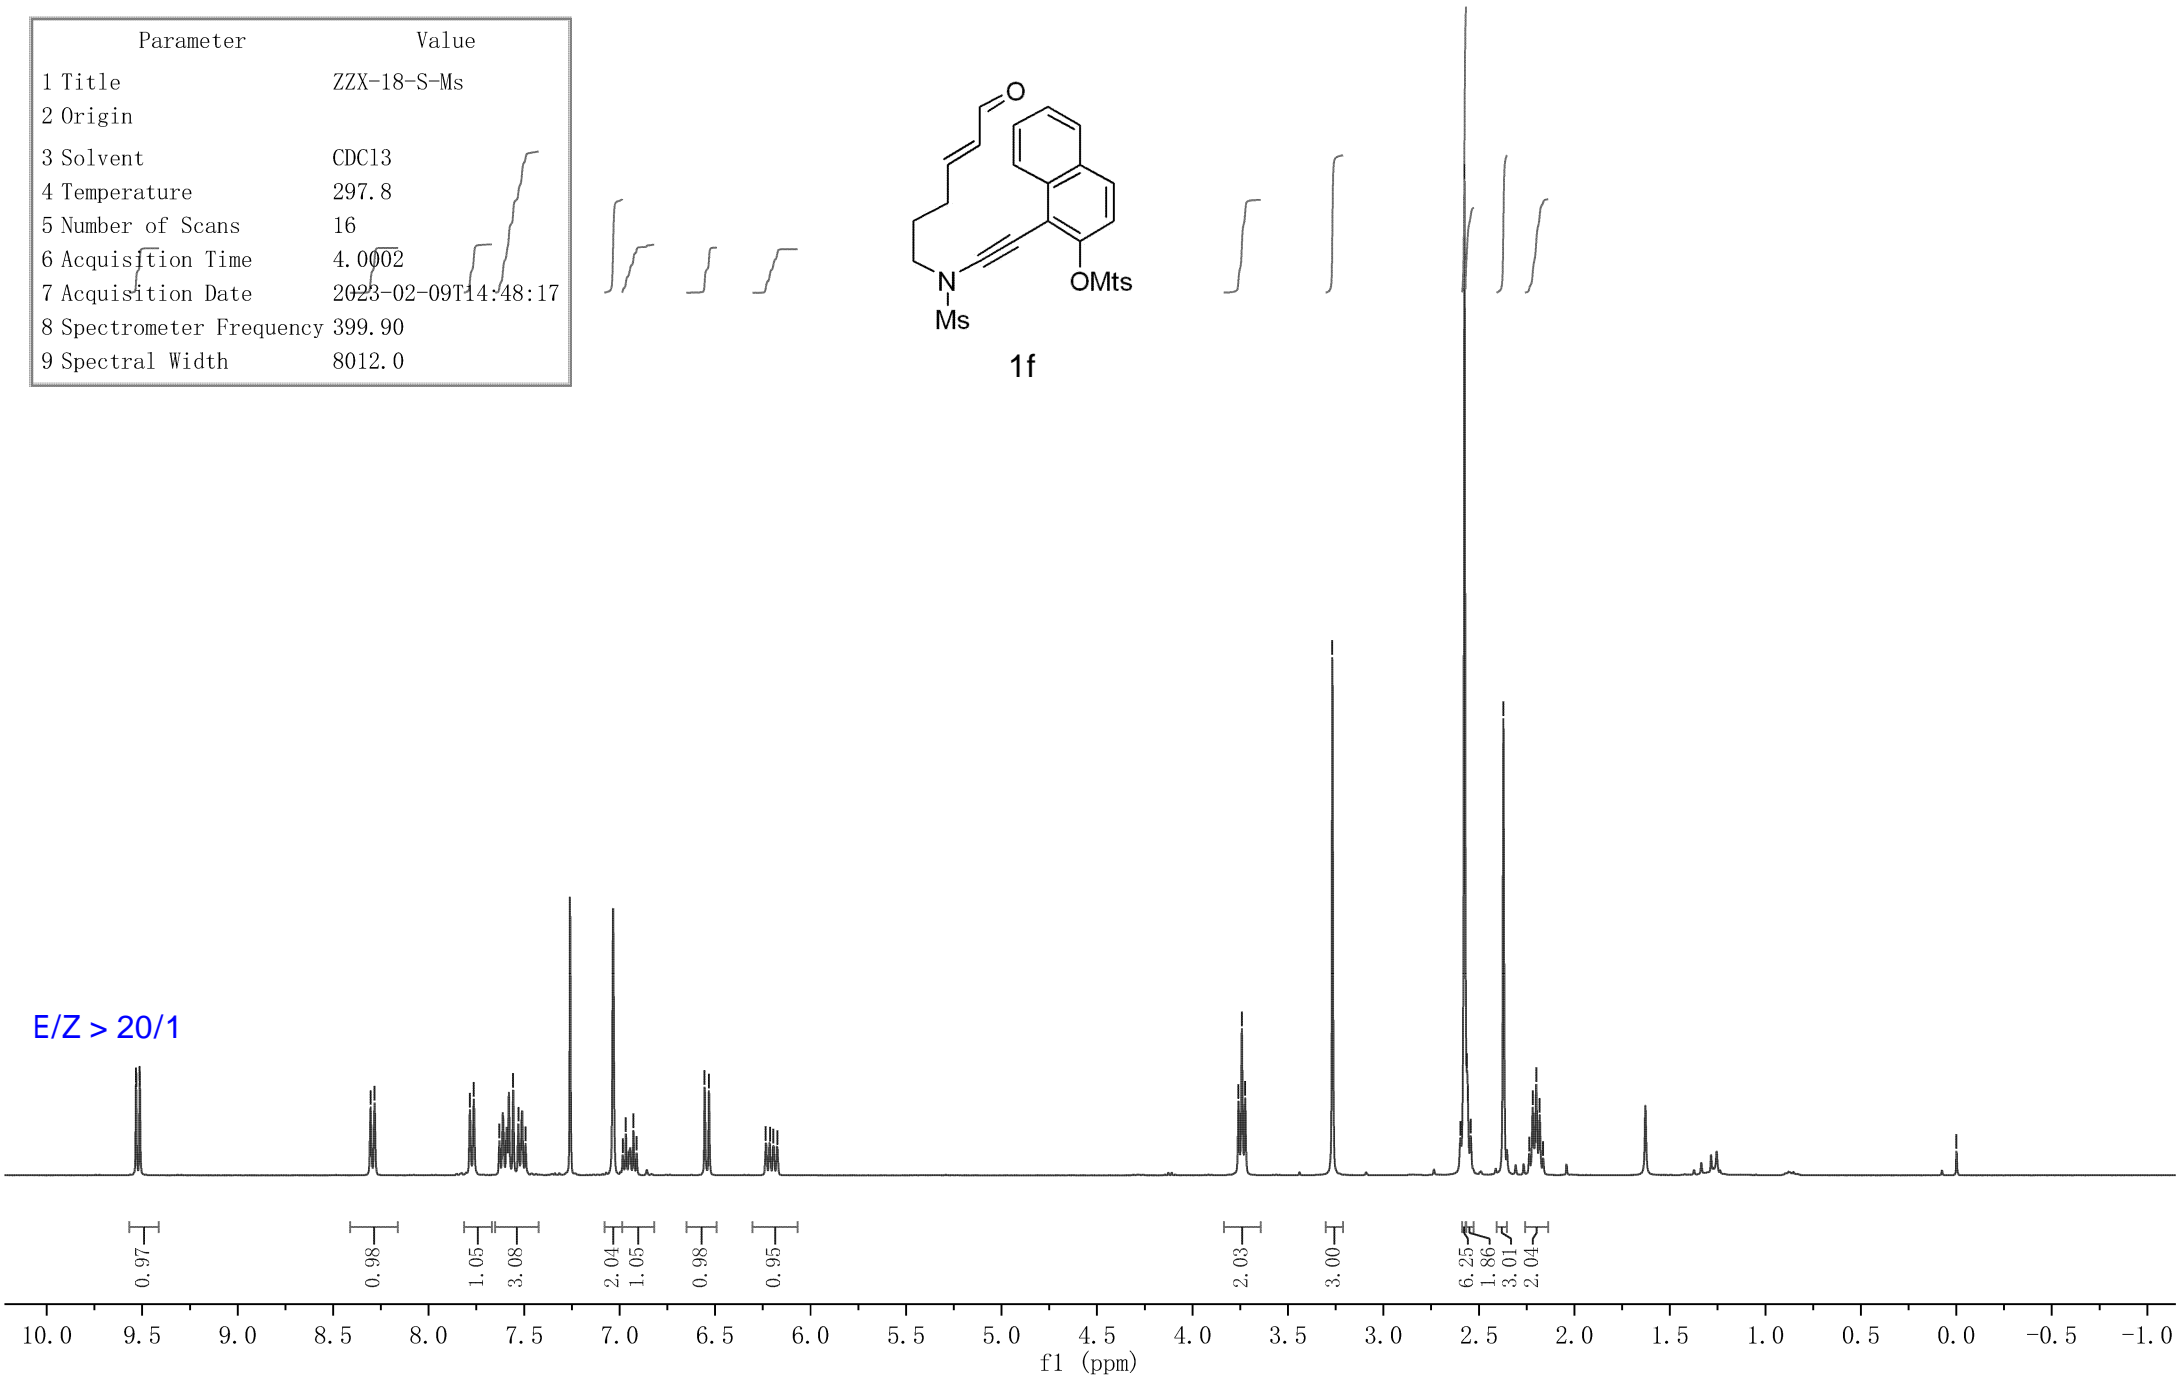

| Parameter                | Value               |
|--------------------------|---------------------|
| 1 Title                  | ZZX-18-S-Ms         |
| 2 Origin                 |                     |
| 3 Solvent                | CDC13               |
| 4 Temperature            | 297.8               |
| 5 Number of Scans        | 400                 |
| 6 Acquisition Time       | 1.0000              |
| 7 Acquisition Date       | 2023-02-09T15:04:27 |
| 8 Spectrometer Frequency | 100.56              |
| 9 Spectral Width         | 26041.0             |

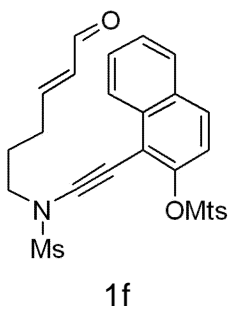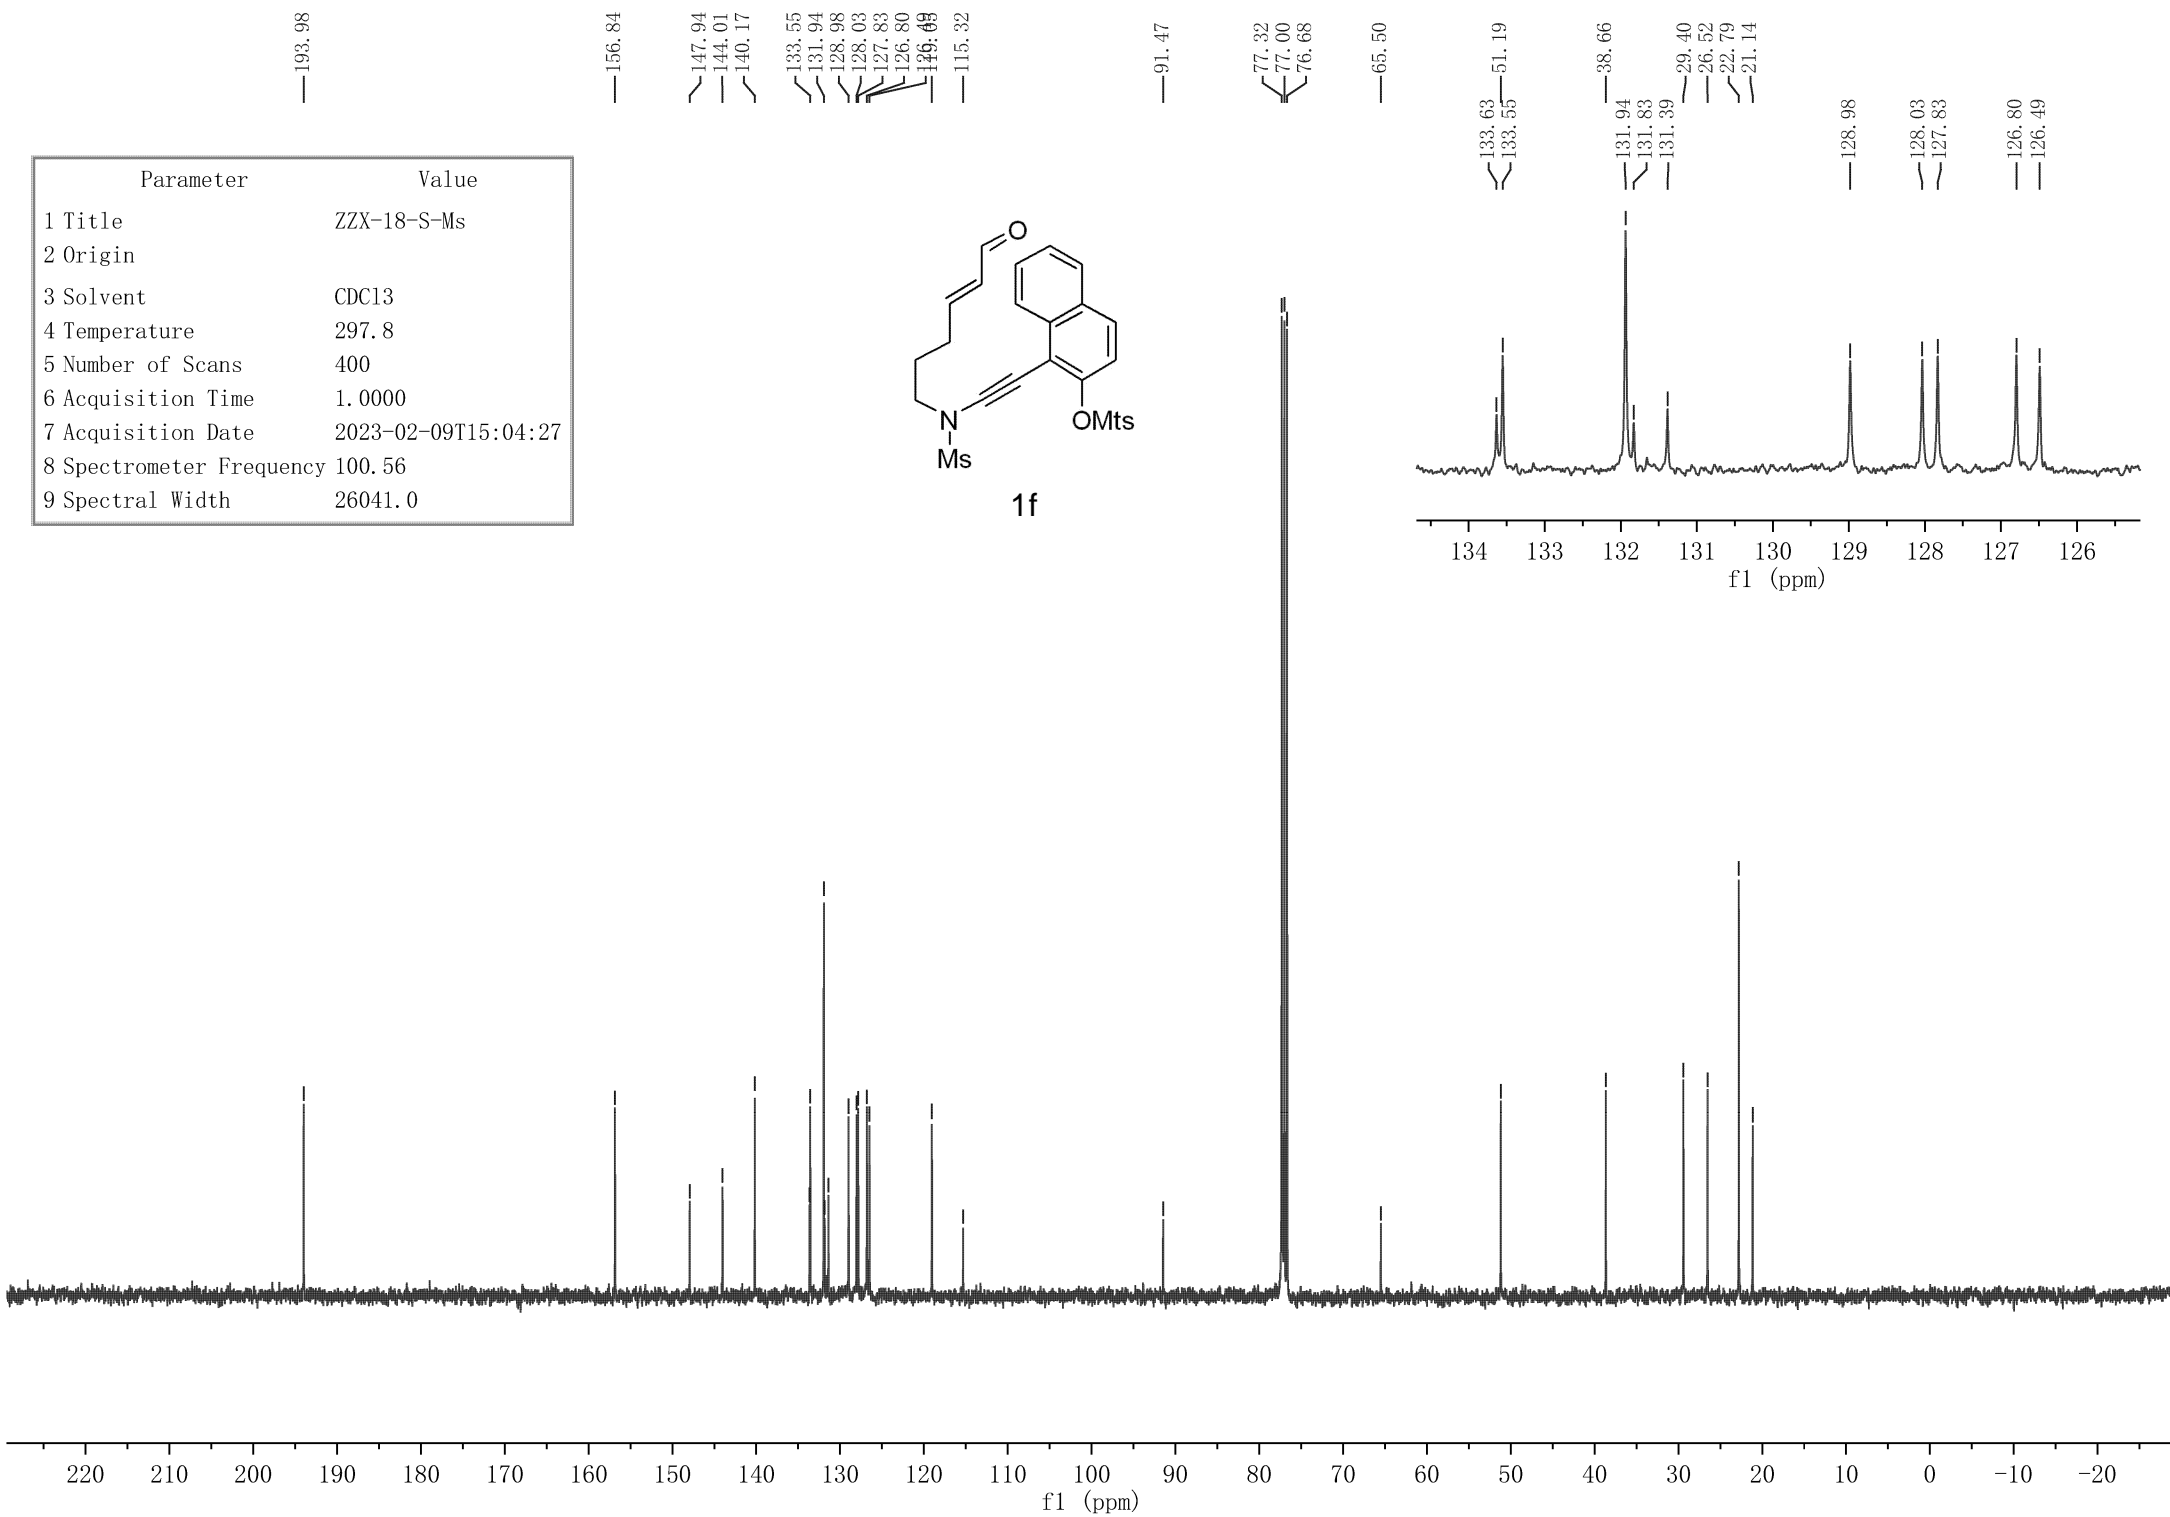

9.507  
9.487

8.238  
8.217

7.929  
7.909  
7.759

7.739  
7.379  
7.359

7.288  
7.268  
7.248

6.996  
6.974  
6.925

6.908  
6.869  
6.852

6.164  
6.144  
6.125

6.105

3.559  
3.542  
3.525

2.515  
2.498  
2.480

2.460  
2.442  
2.423

2.110  
2.092  
2.074

2.056  
2.038

-0.000

| Parameter                | Value               |
|--------------------------|---------------------|
| 1 Title                  | ZZX-10-137          |
| 2 Origin                 |                     |
| 3 Solvent                | CDC13               |
| 4 Temperature            | 297.8               |
| 5 Number of Scans        | 16                  |
| 6 Acquisition Time       | 4.0002              |
| 7 Acquisition Date       | 2022-03-18T09:25:18 |
| 8 Spectrometer Frequency | 399.93              |
| 9 Spectral Width         | 8012.0              |

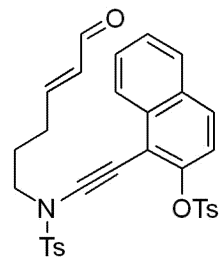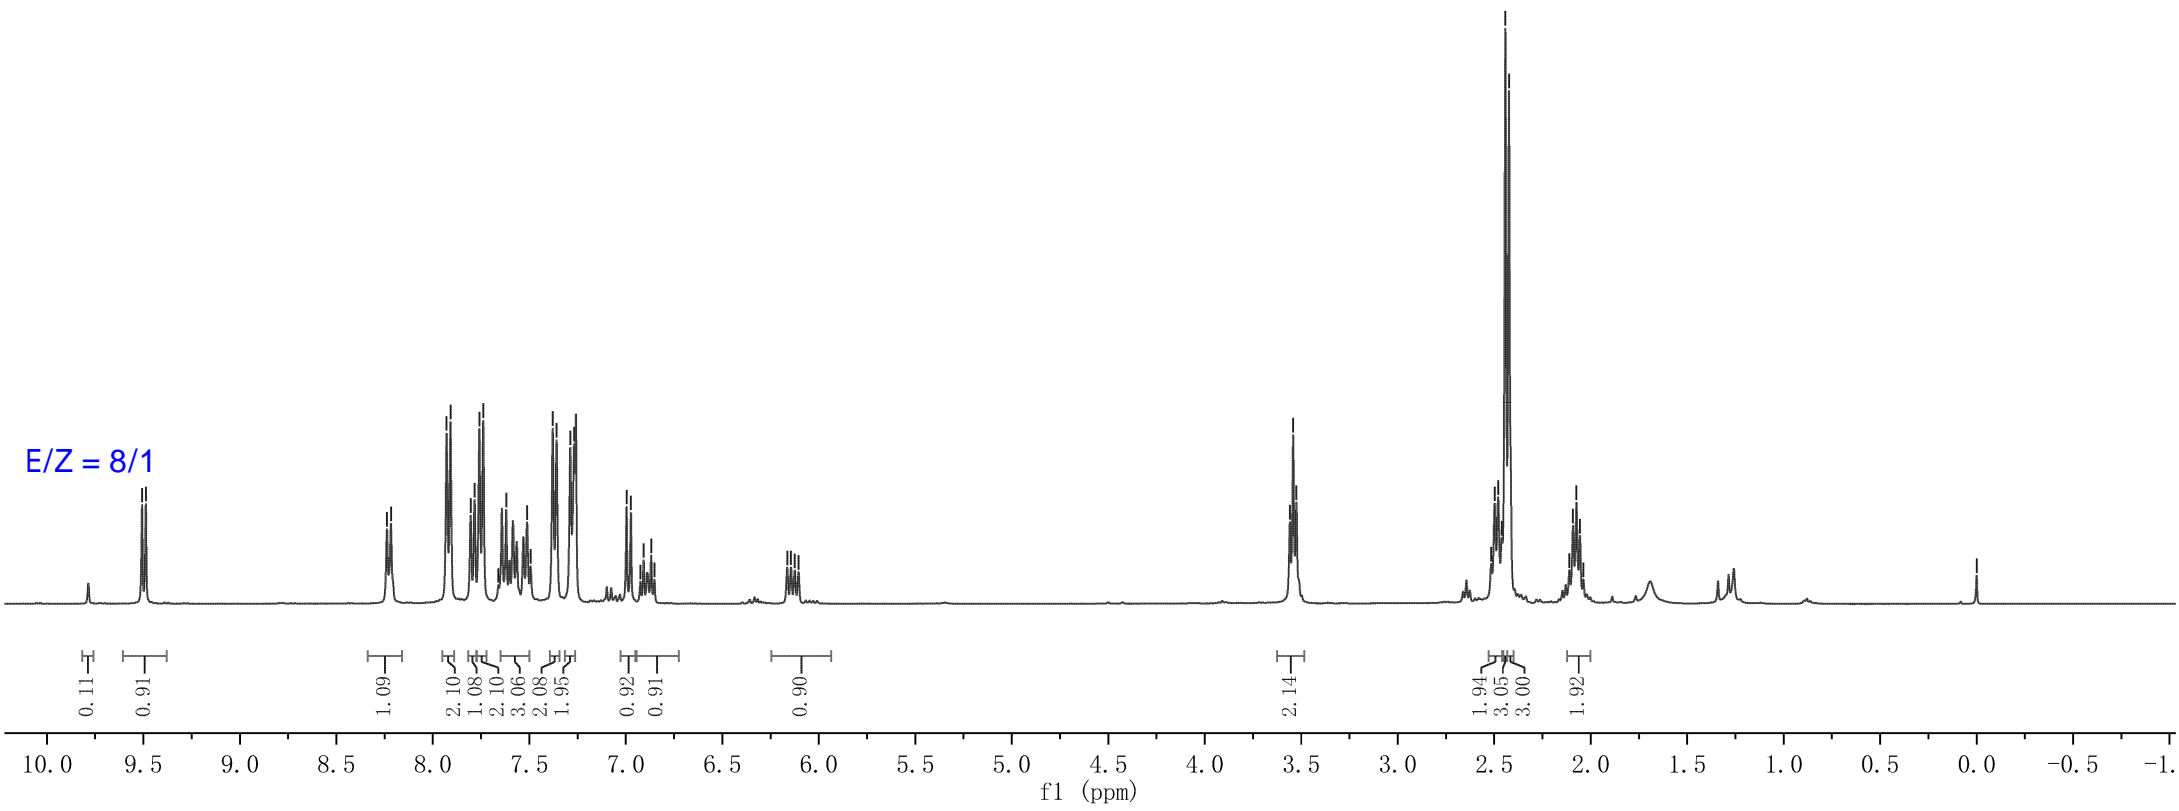

| Parameter                | Value               |
|--------------------------|---------------------|
| 1 Title                  | ZZX-10-137          |
| 2 Origin                 |                     |
| 3 Solvent                | CDC13               |
| 4 Temperature            | 298.0               |
| 5 Number of Scans        | 200                 |
| 6 Acquisition Time       | 1.0000              |
| 7 Acquisition Date       | 2022-03-18T09:32:32 |
| 8 Spectrometer Frequency | 100.56              |
| 9 Spectral Width         | 26041.0             |

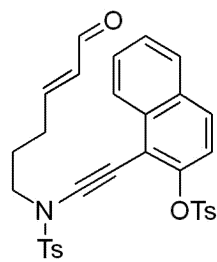

1g

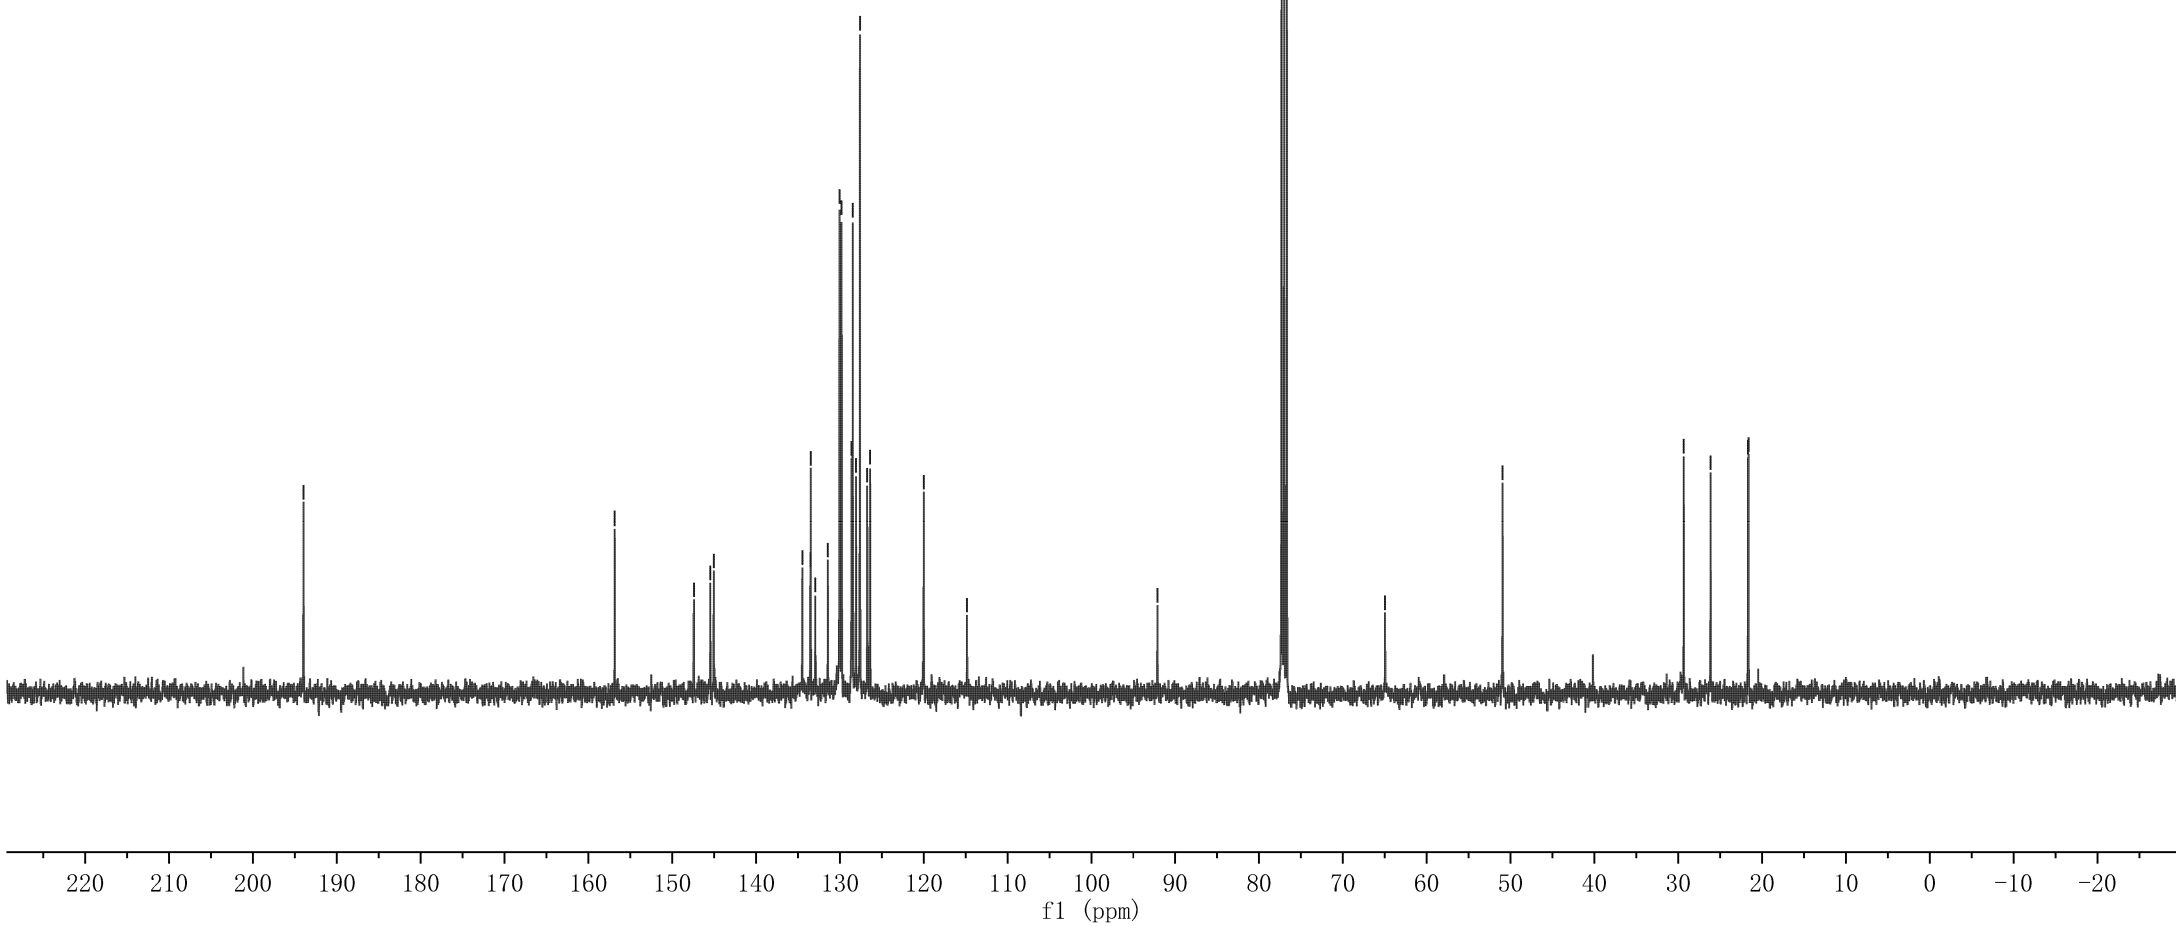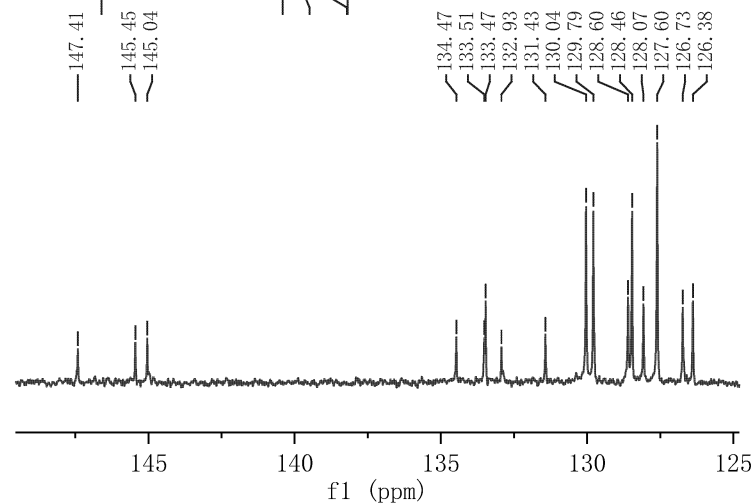

- 193.97
- 156.85
- 147.41
- 145.45
- 145.04
- 133.47
- 130.04
- 129.79
- 128.60
- 128.46
- 128.07
- 127.60
- 126.99
- 114.83
- 92.12
- 77.32
- 77.00
- 76.68
- 64.97
- 50.95
- 147.41
- 145.45
- 145.04
- 29.34
- 26.14
- 21.67
- 21.62
- 134.47
- 133.51
- 133.47
- 132.93
- 131.43
- 130.04
- 129.79
- 128.60
- 128.46
- 128.07
- 127.60
- 126.73
- 126.38

9.508  
9.488

8.206  
8.185  
7.929  
7.908  
7.802  
7.792  
7.771  
7.379  
7.358  
7.035  
6.932  
6.910  
6.869  
6.852  
6.164  
6.145  
6.125  
6.105

3.849  
3.561  
3.544  
3.527  
2.512  
2.494  
2.476  
2.457  
2.439  
2.104  
2.086  
2.068  
2.050  
2.032

0.000

| Parameter                | Value               |
|--------------------------|---------------------|
| 1 Title                  | zzx-12-173-H        |
| 2 Origin                 | Bruker BioSpin GmbH |
| 3 Solvent                | CDC13               |
| 4 Temperature            | 298.0               |
| 5 Number of Scans        | 11                  |
| 6 Acquisition Time       | 4.0894              |
| 7 Acquisition Date       | 2021-03-06T16:35:54 |
| 8 Spectrometer Frequency | 400.13              |
| 9 Spectral Width         | 8012.8              |

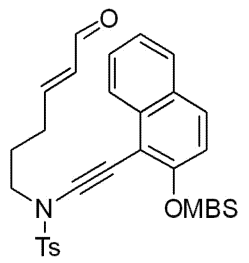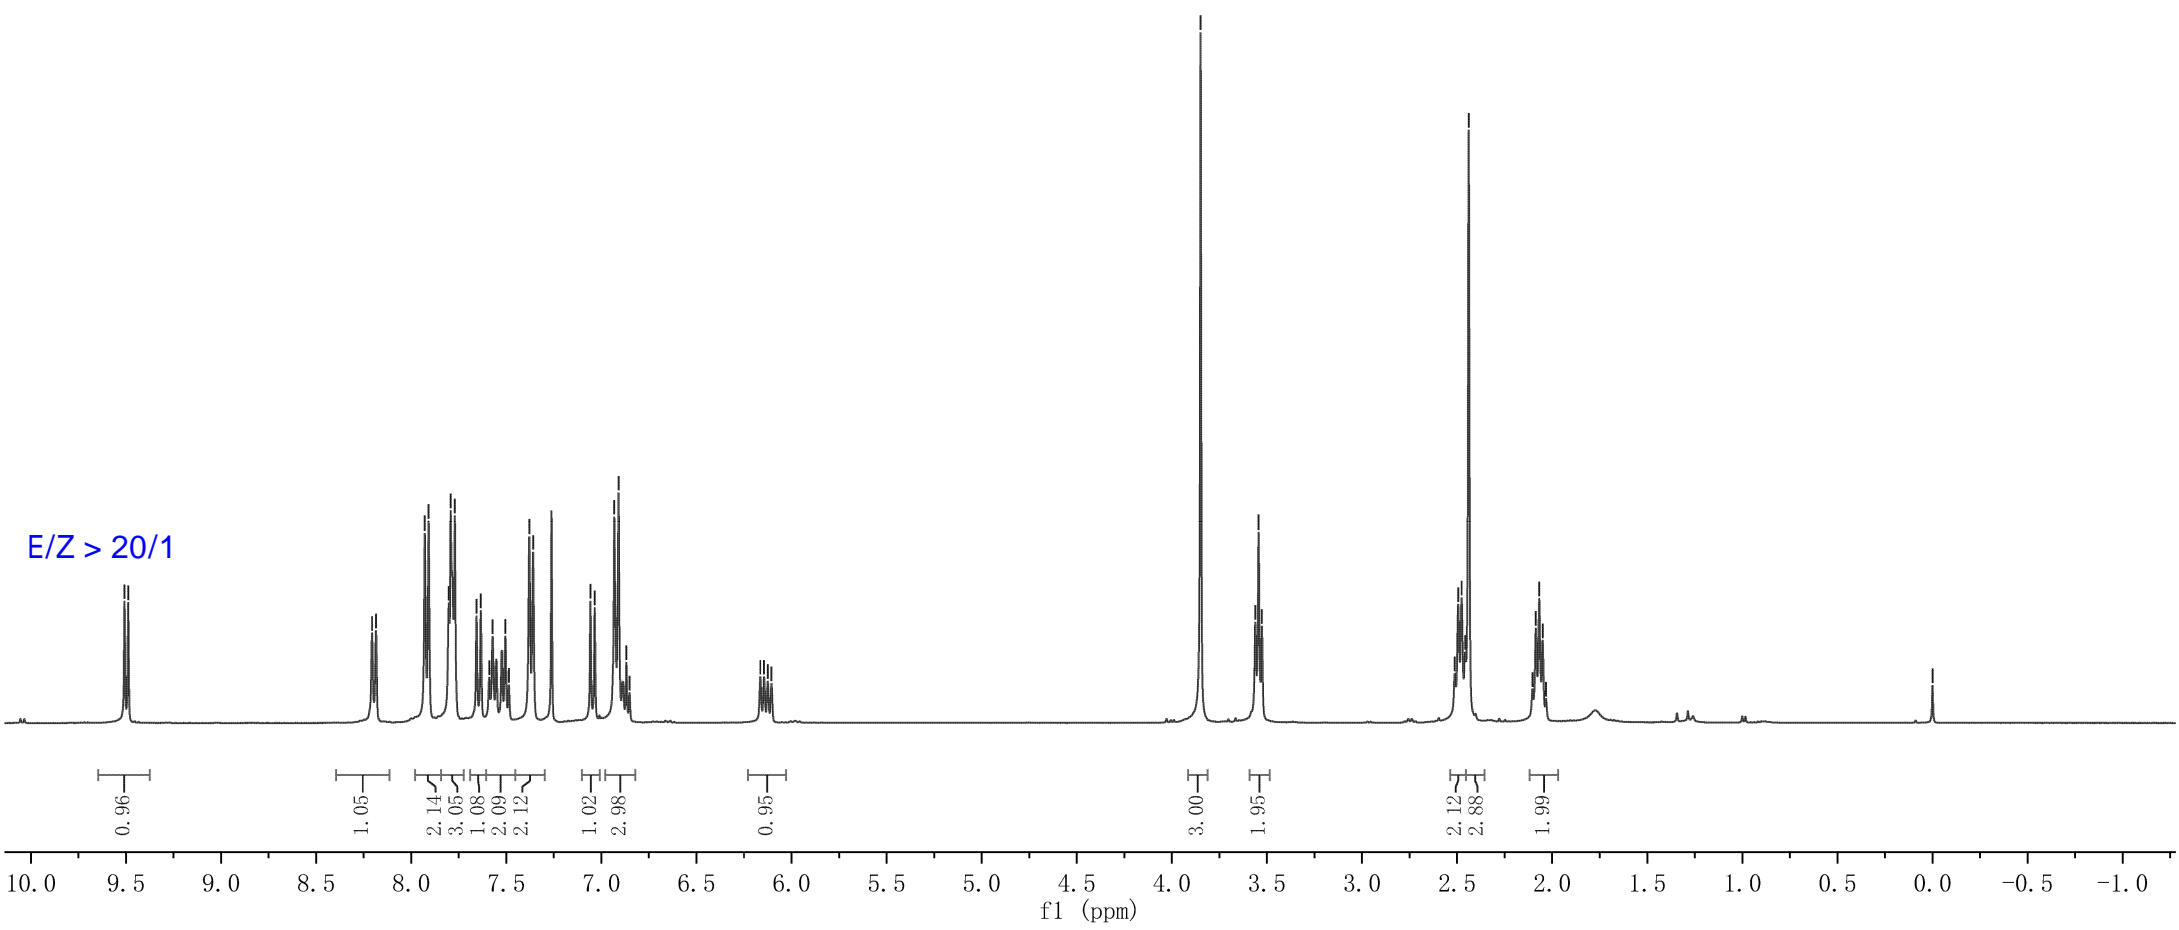

| Parameter                | Value               |
|--------------------------|---------------------|
| 1 Title                  | zzx-12-173-C        |
| 2 Origin                 | Bruker BioSpin GmbH |
| 3 Solvent                | CDC13               |
| 4 Temperature            | 300.0               |
| 5 Number of Scans        | 35                  |
| 6 Acquisition Time       | 1.3631              |
| 7 Acquisition Date       | 2021-03-06T16:37:35 |
| 8 Spectrometer Frequency | 100.61              |
| 9 Spectral Width         | 24038.5             |

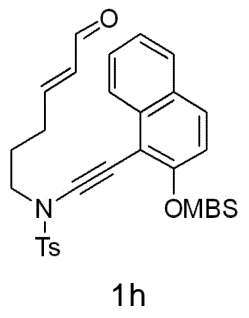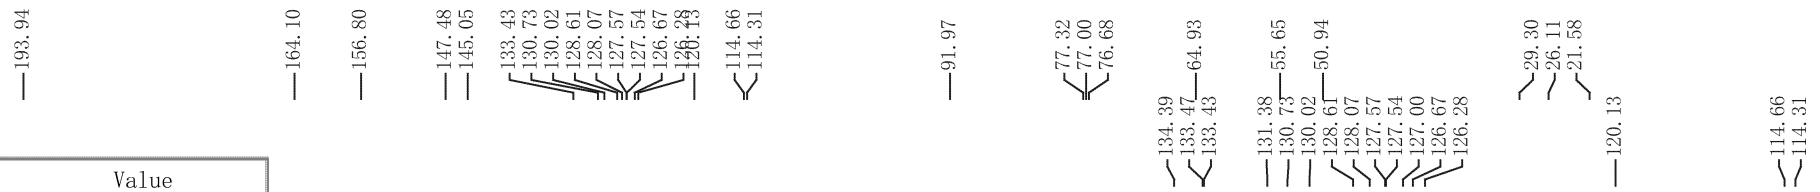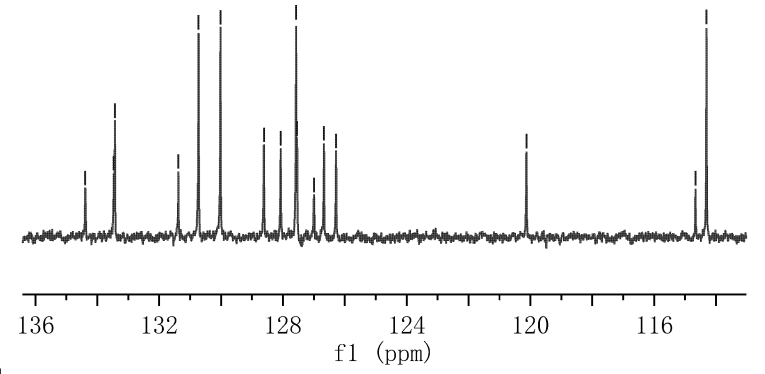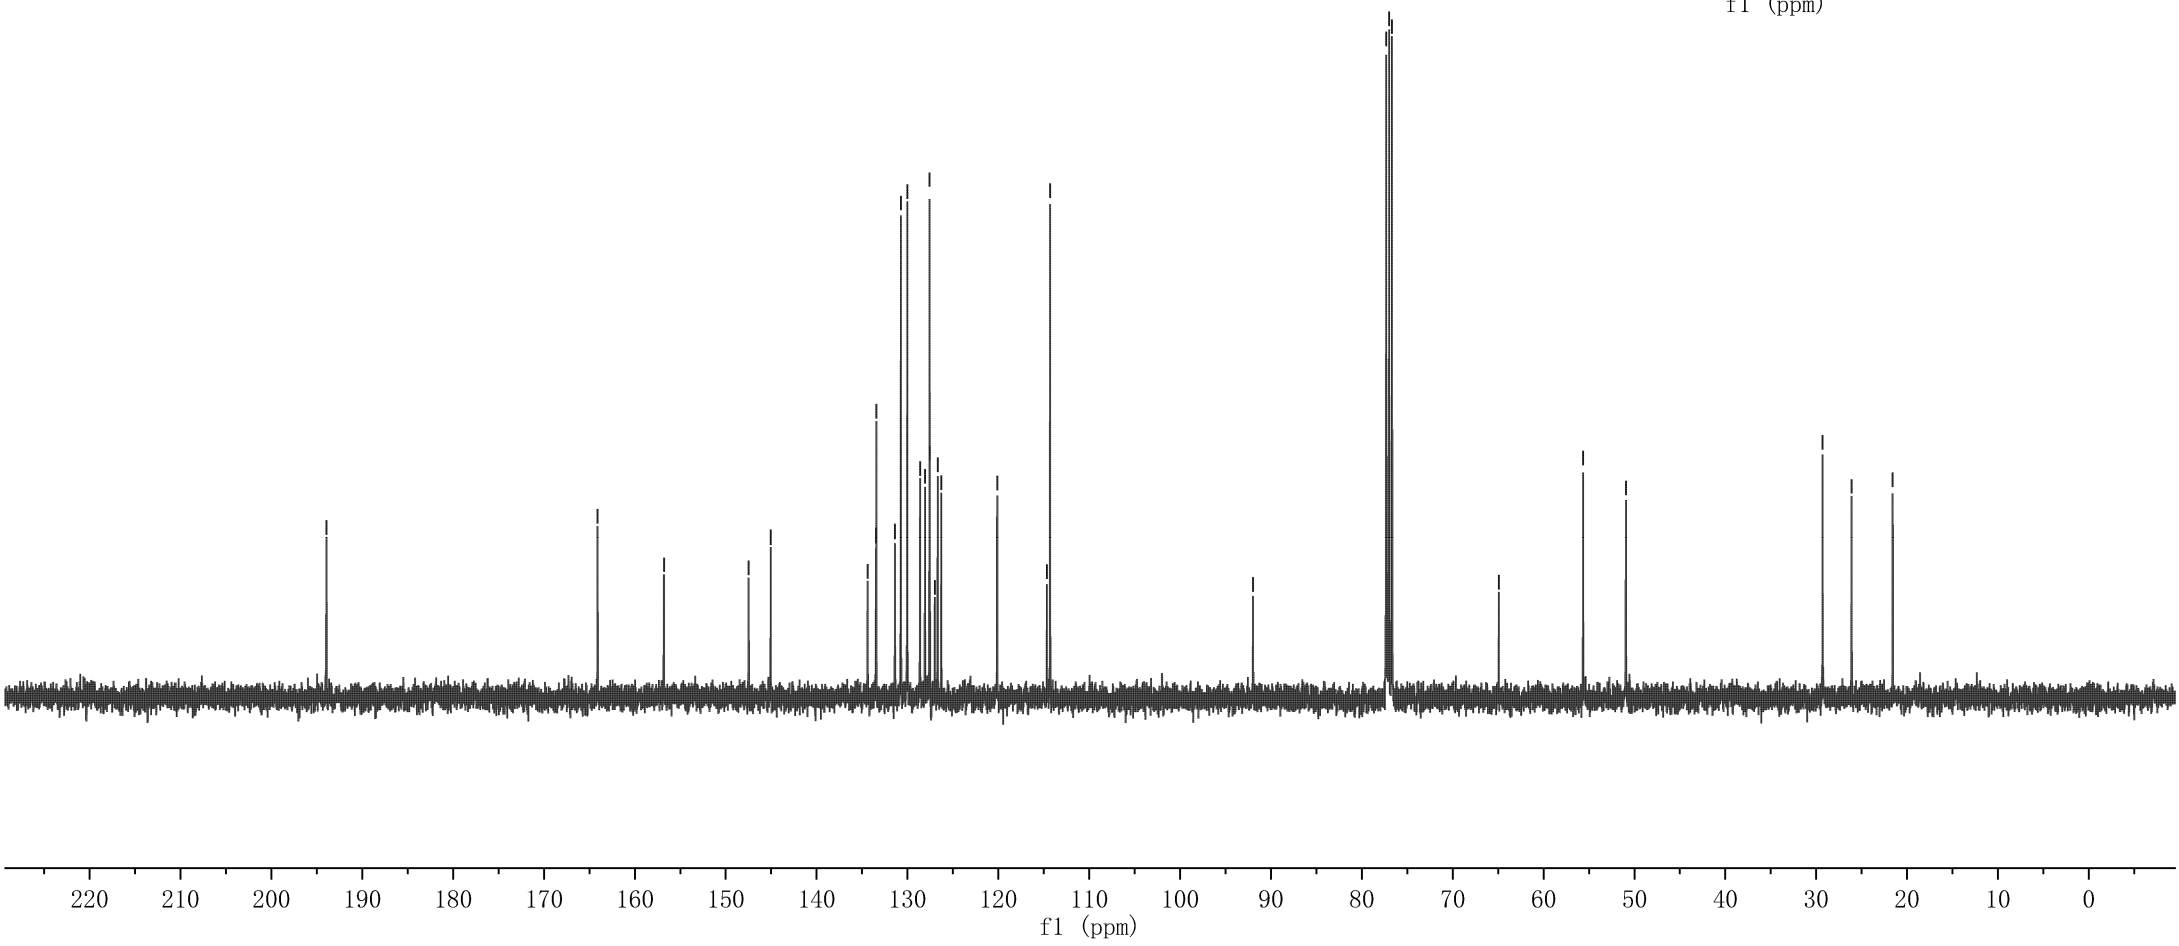

9.503  
9.483

8.256  
8.236

7.933  
7.913

7.829  
7.808

7.530  
7.511

7.373  
7.353

6.965  
6.919

6.902  
6.885

6.863  
6.847

6.159  
6.139

6.120  
6.100

3.563  
3.546  
3.530

2.490  
2.473

2.434

2.092  
2.074

2.057

1.334

0.000

| Parameter                | Value               |
|--------------------------|---------------------|
| 1 Title                  | zzx-11-164-H        |
| 2 Origin                 | Bruker BioSpin GmbH |
| 3 Solvent                | CDC13               |
| 4 Temperature            | 298.0               |
| 5 Number of Scans        | 17                  |
| 6 Acquisition Time       | 4.0894              |
| 7 Acquisition Date       | 2020-11-29T15:06:33 |
| 8 Spectrometer Frequency | 400.13              |
| 9 Spectral Width         | 8012.8              |

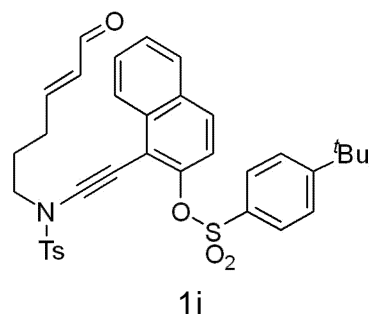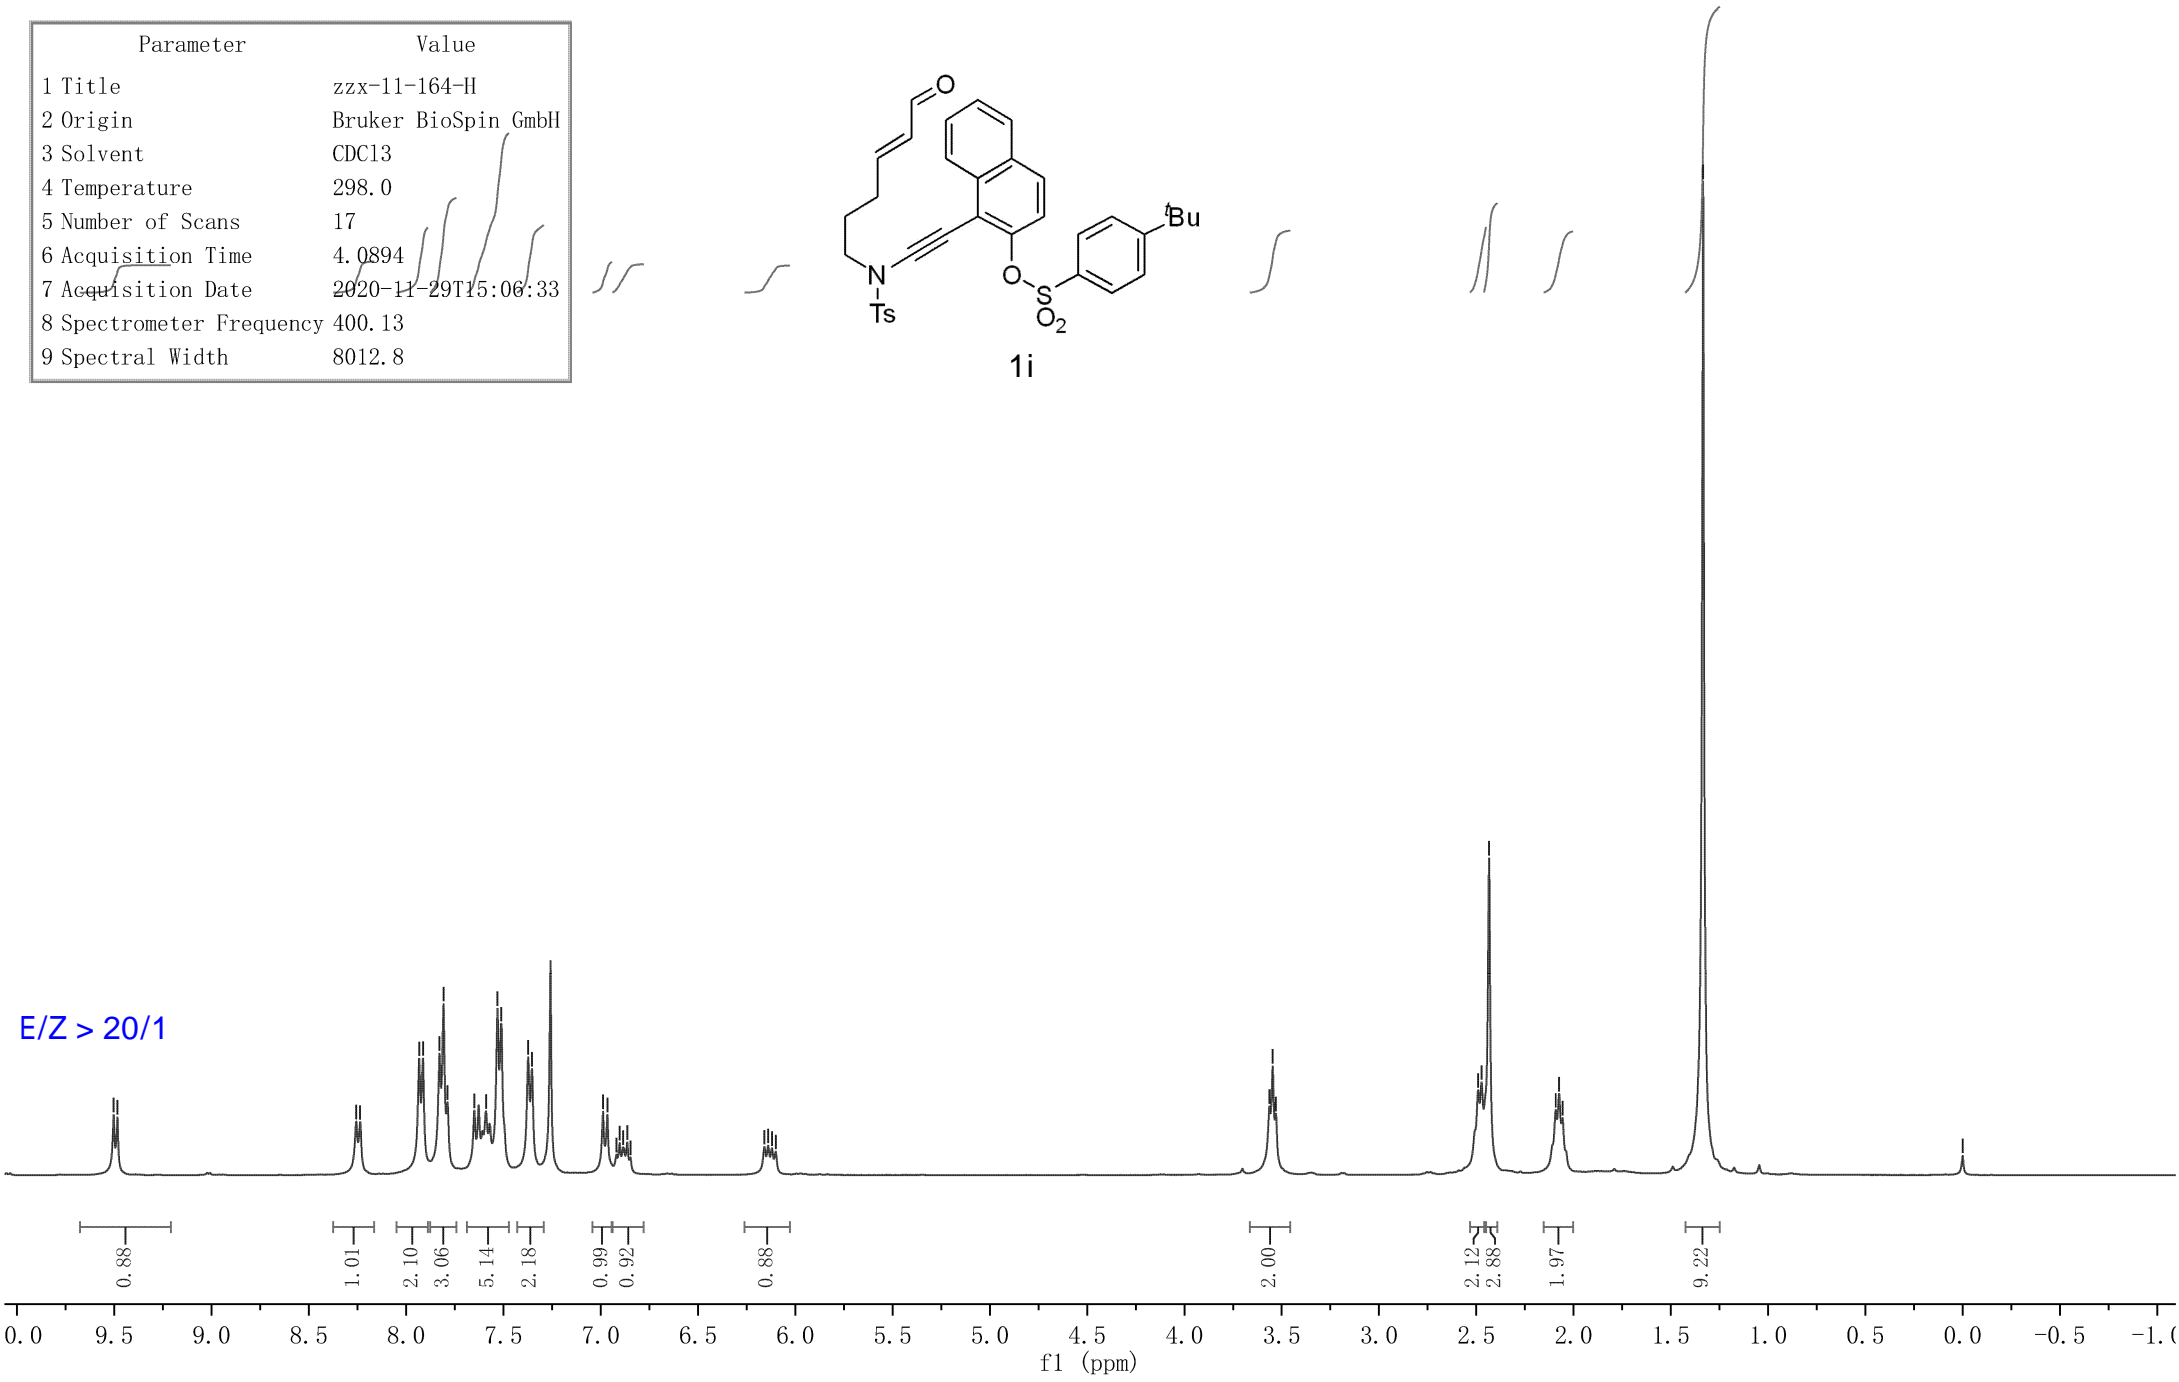



| Parameter                | Value               |
|--------------------------|---------------------|
| 1 Title                  | zzx-11-164-C        |
| 2 Origin                 | Bruker BioSpin GmbH |
| 3 Solvent                | CDC13               |
| 4 Temperature            | 300.0               |
| 5 Number of Scans        | 64                  |
| 6 Acquisition Time       | 1.3631              |
| 7 Acquisition Date       | 2020-11-29T15:09:28 |
| 8 Spectrometer Frequency | 100.61              |
| 9 Spectral Width         | 24038.5             |

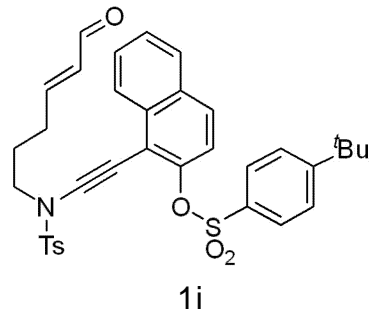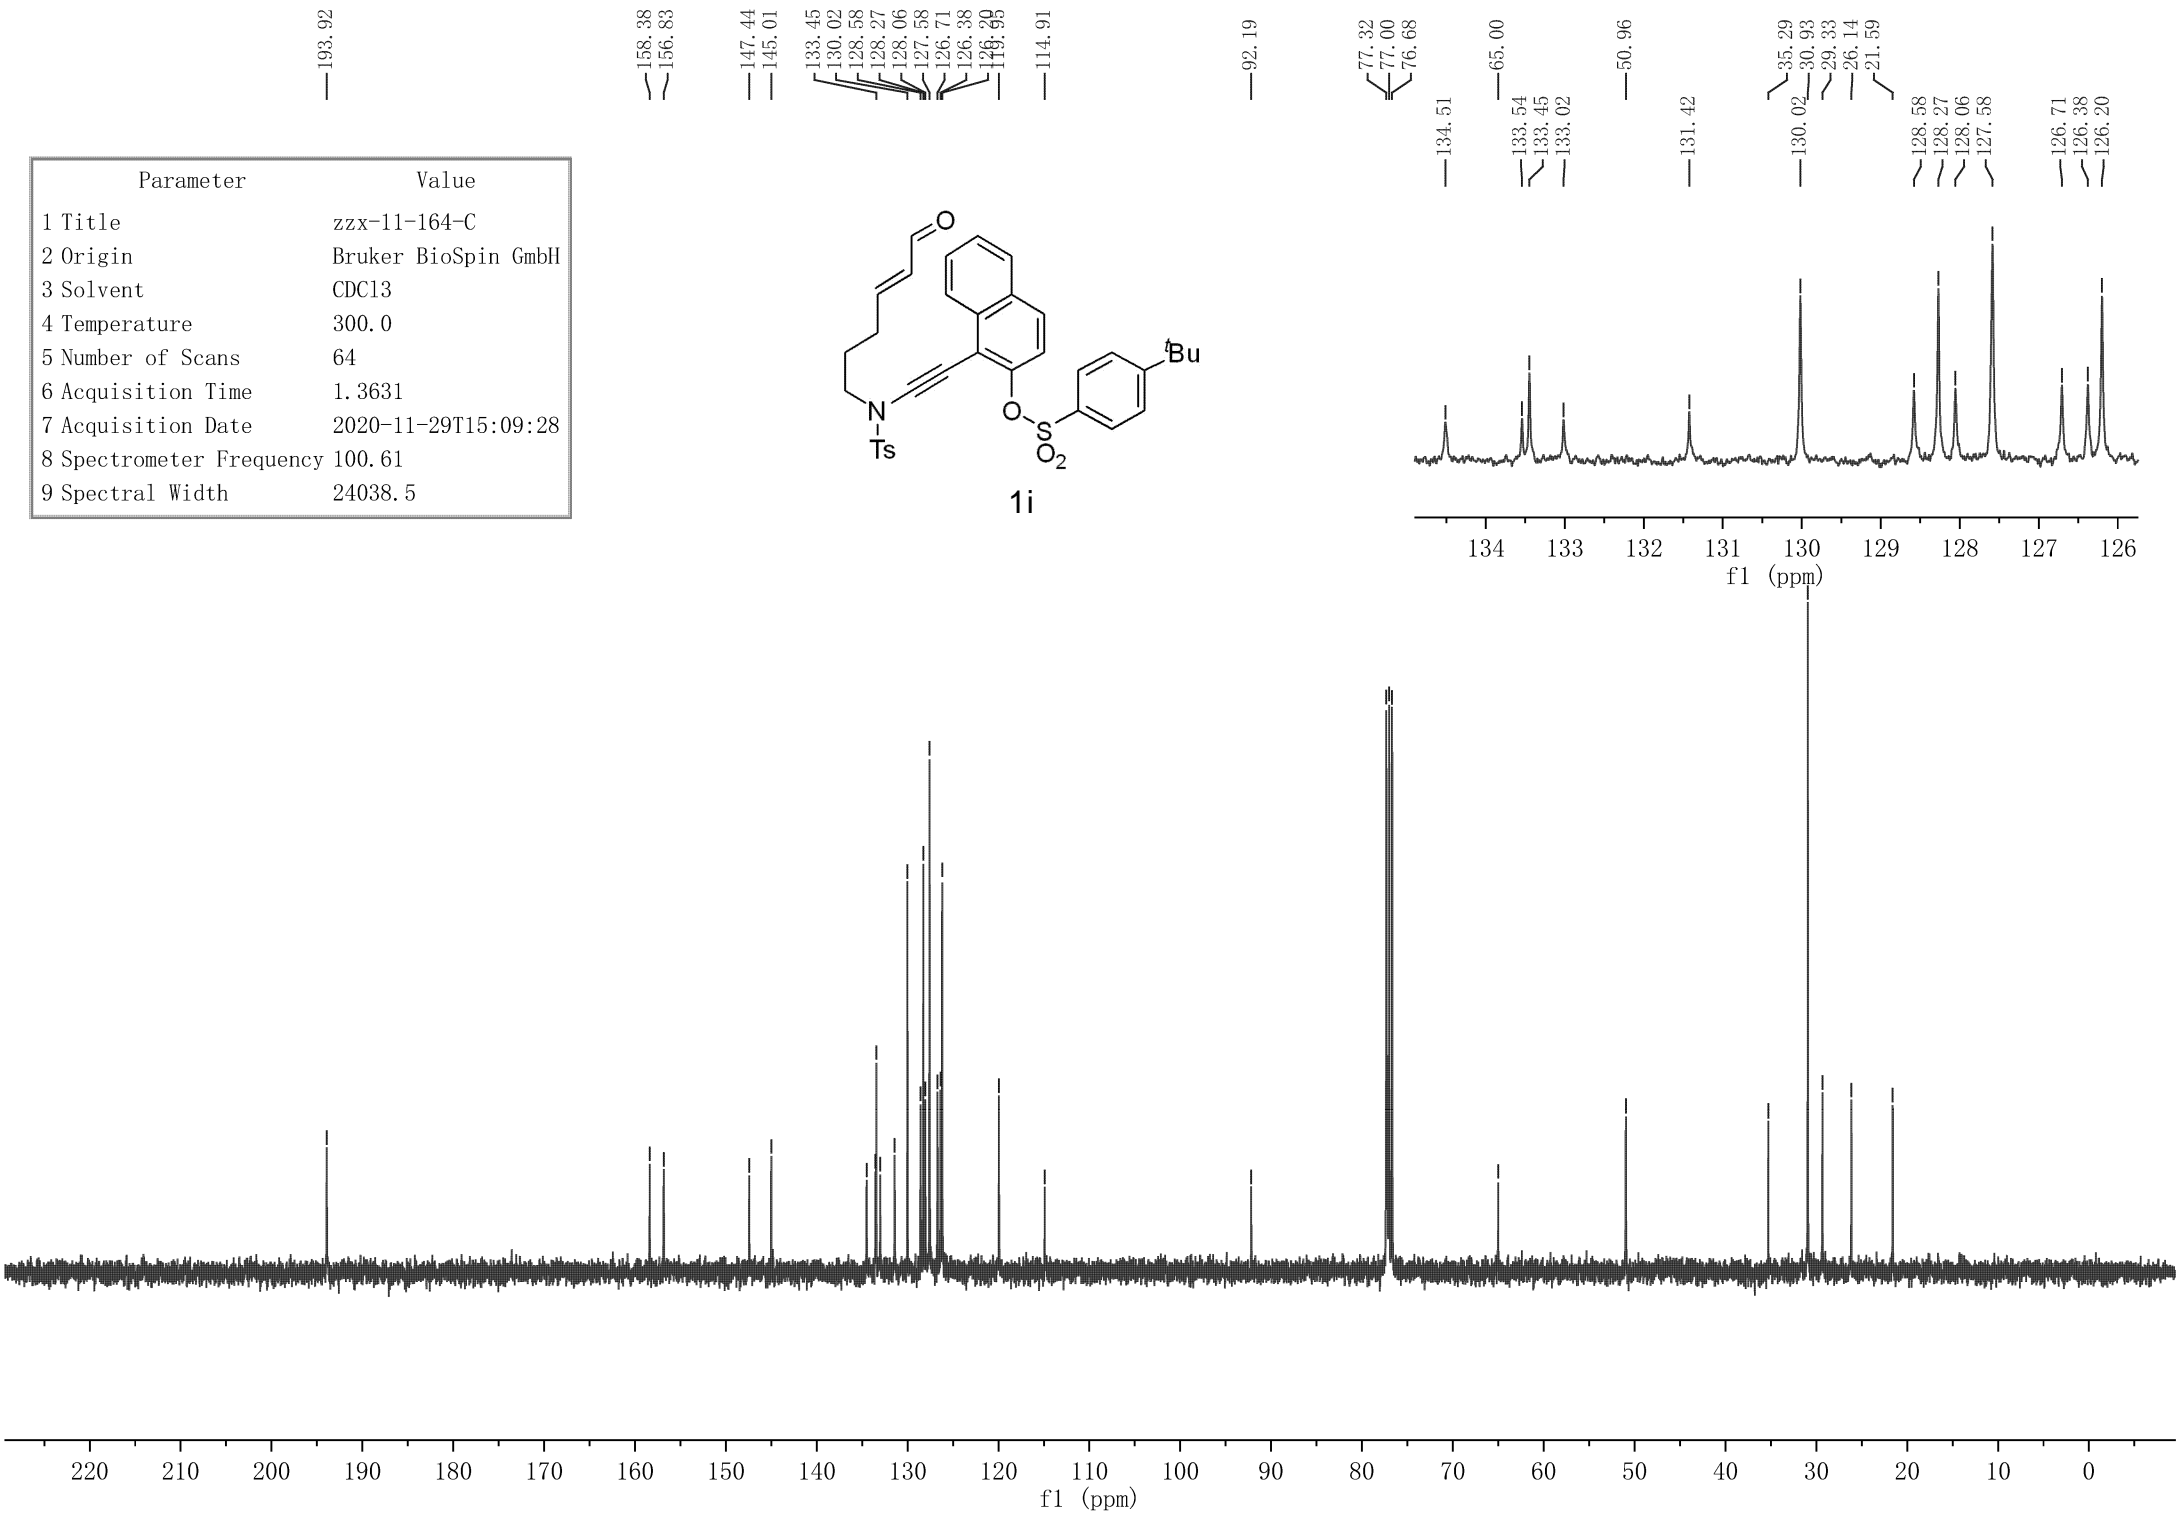

| Parameter                | Value               |
|--------------------------|---------------------|
| 1 Title                  | zzx-12-172-H        |
| 2 Origin                 | Bruker BioSpin GmbH |
| 3 Solvent                | CDC13               |
| 4 Temperature            | 298.0               |
| 5 Number of Scans        | 7                   |
| 6 Acquisition Time       | 4.0894              |
| 7 Acquisition Date       | 2021-03-06T16:29:47 |
| 8 Spectrometer Frequency | 400.13              |
| 9 Spectral Width         | 8012.8              |

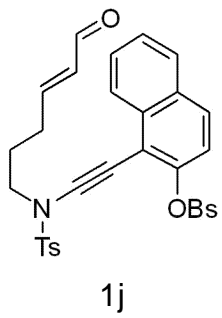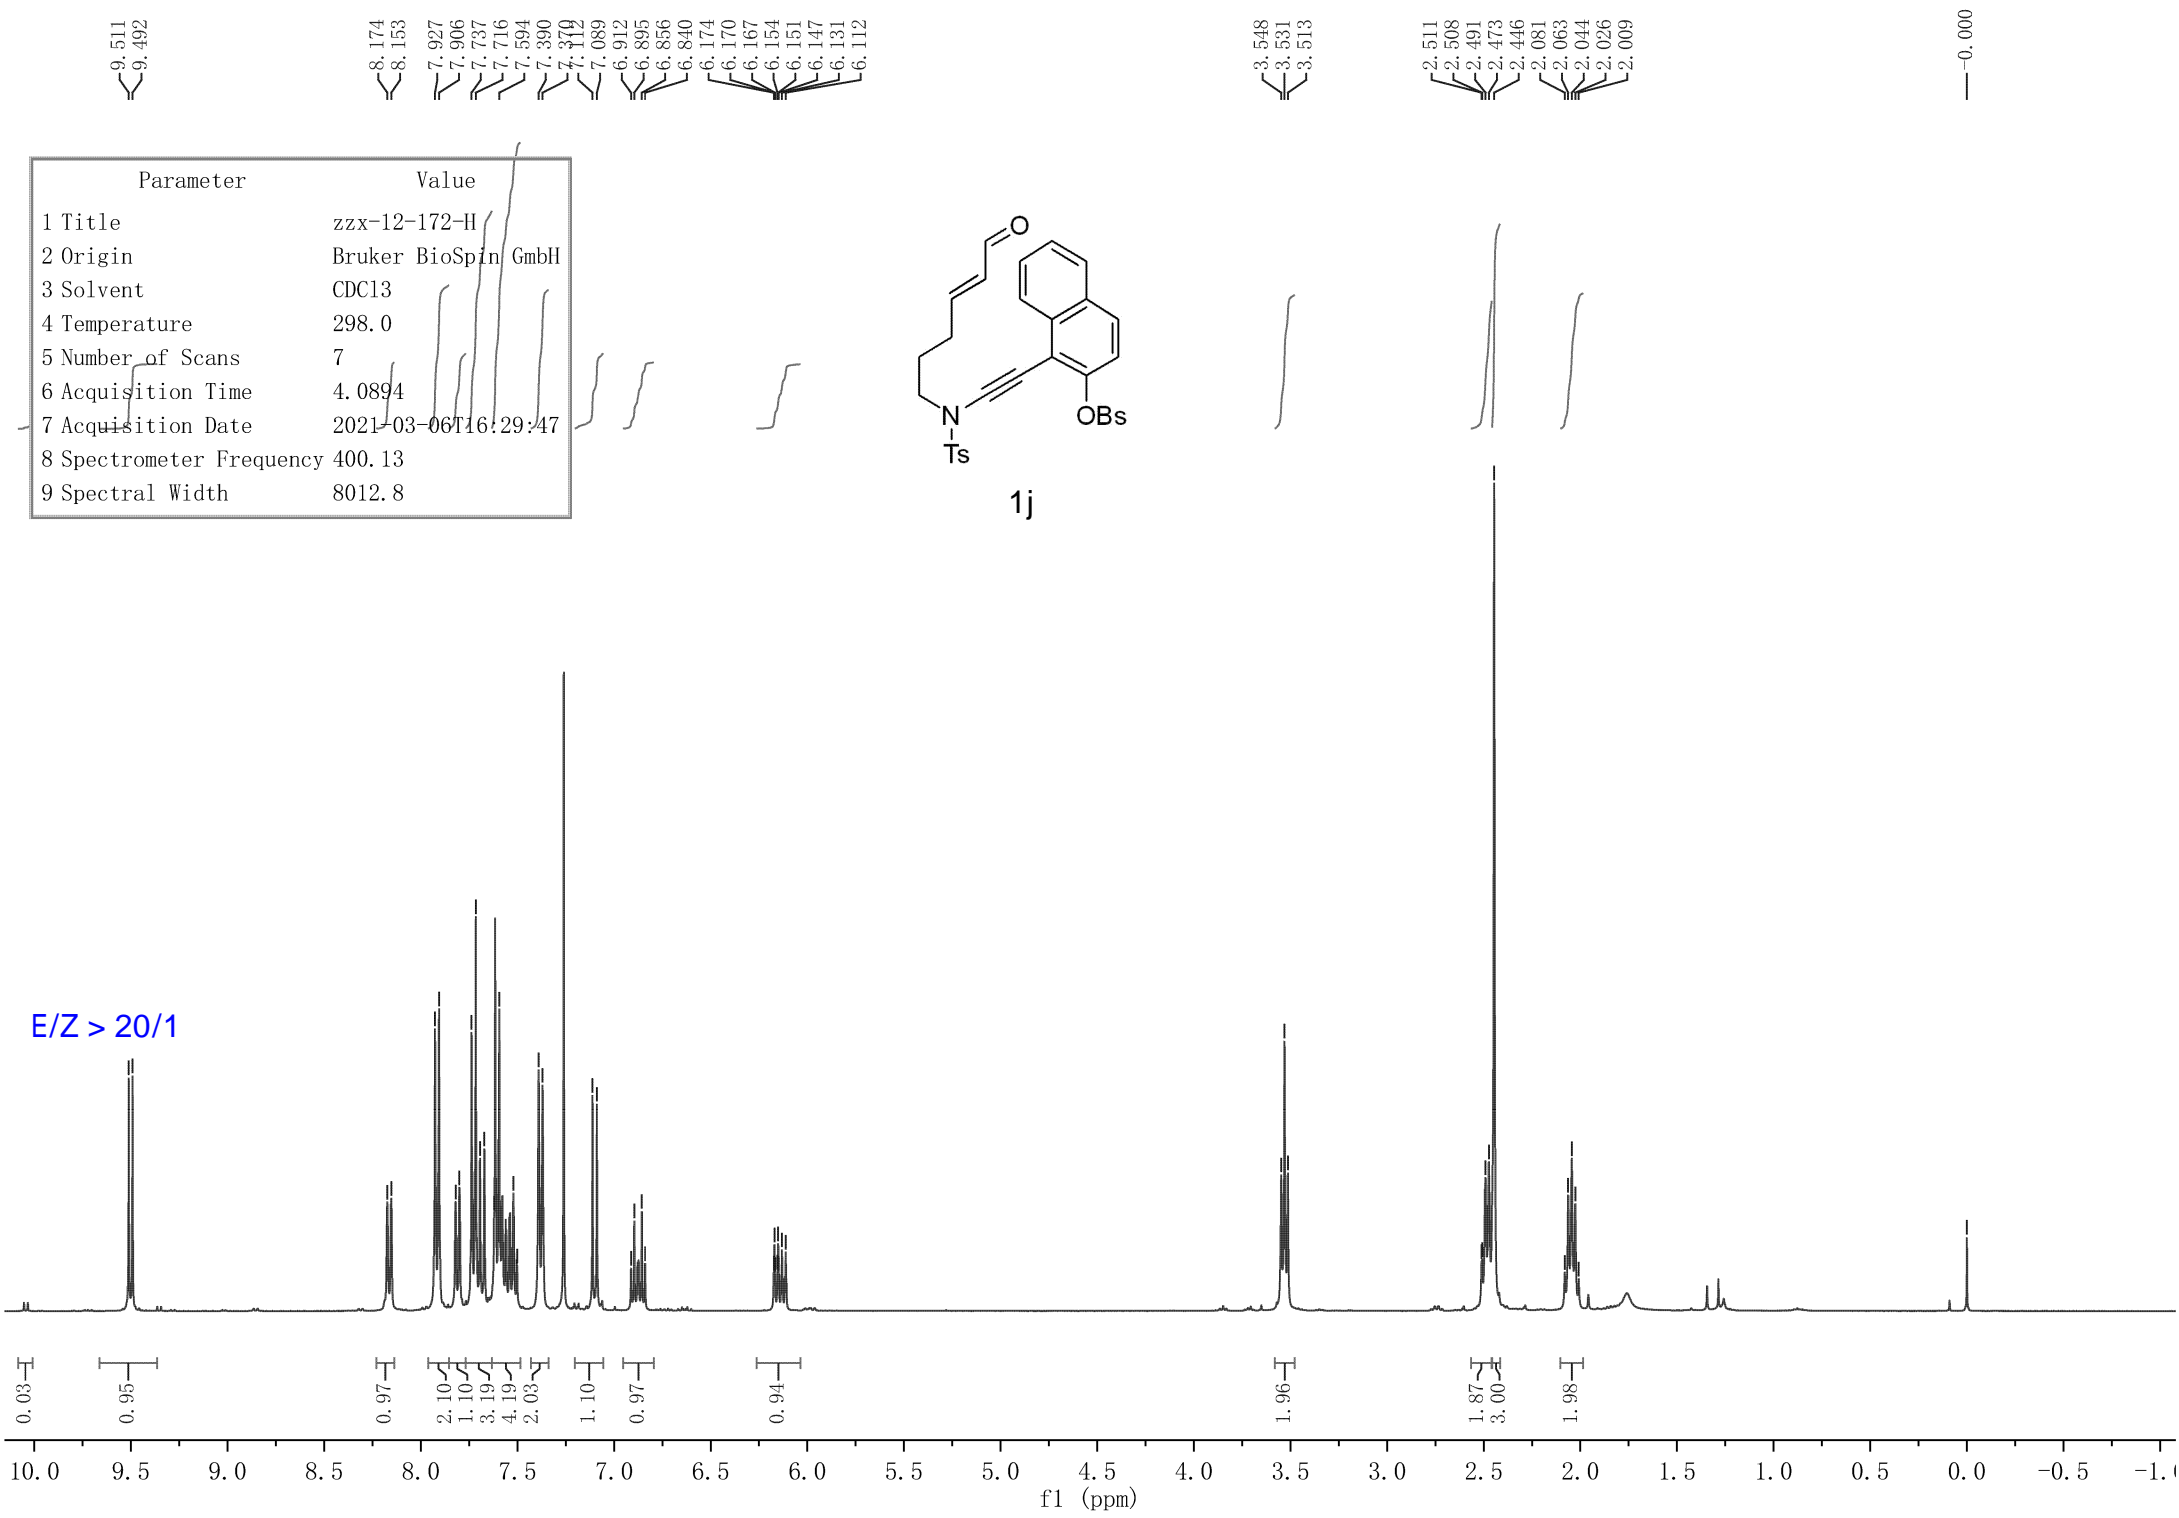

| Parameter                | Value               |
|--------------------------|---------------------|
| 1 Title                  | zzx-12-172-C        |
| 2 Origin                 | Bruker BioSpin GmbH |
| 3 Solvent                | CDC13               |
| 4 Temperature            | 300.0               |
| 5 Number of Scans        | 22                  |
| 6 Acquisition Time       | 1.3631              |
| 7 Acquisition Date       | 2021-03-06T16:31:03 |
| 8 Spectrometer Frequency | 100.61              |
| 9 Spectral Width         | 24038.5             |

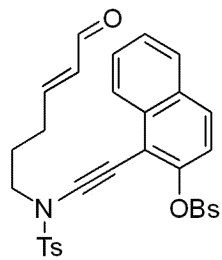

1j

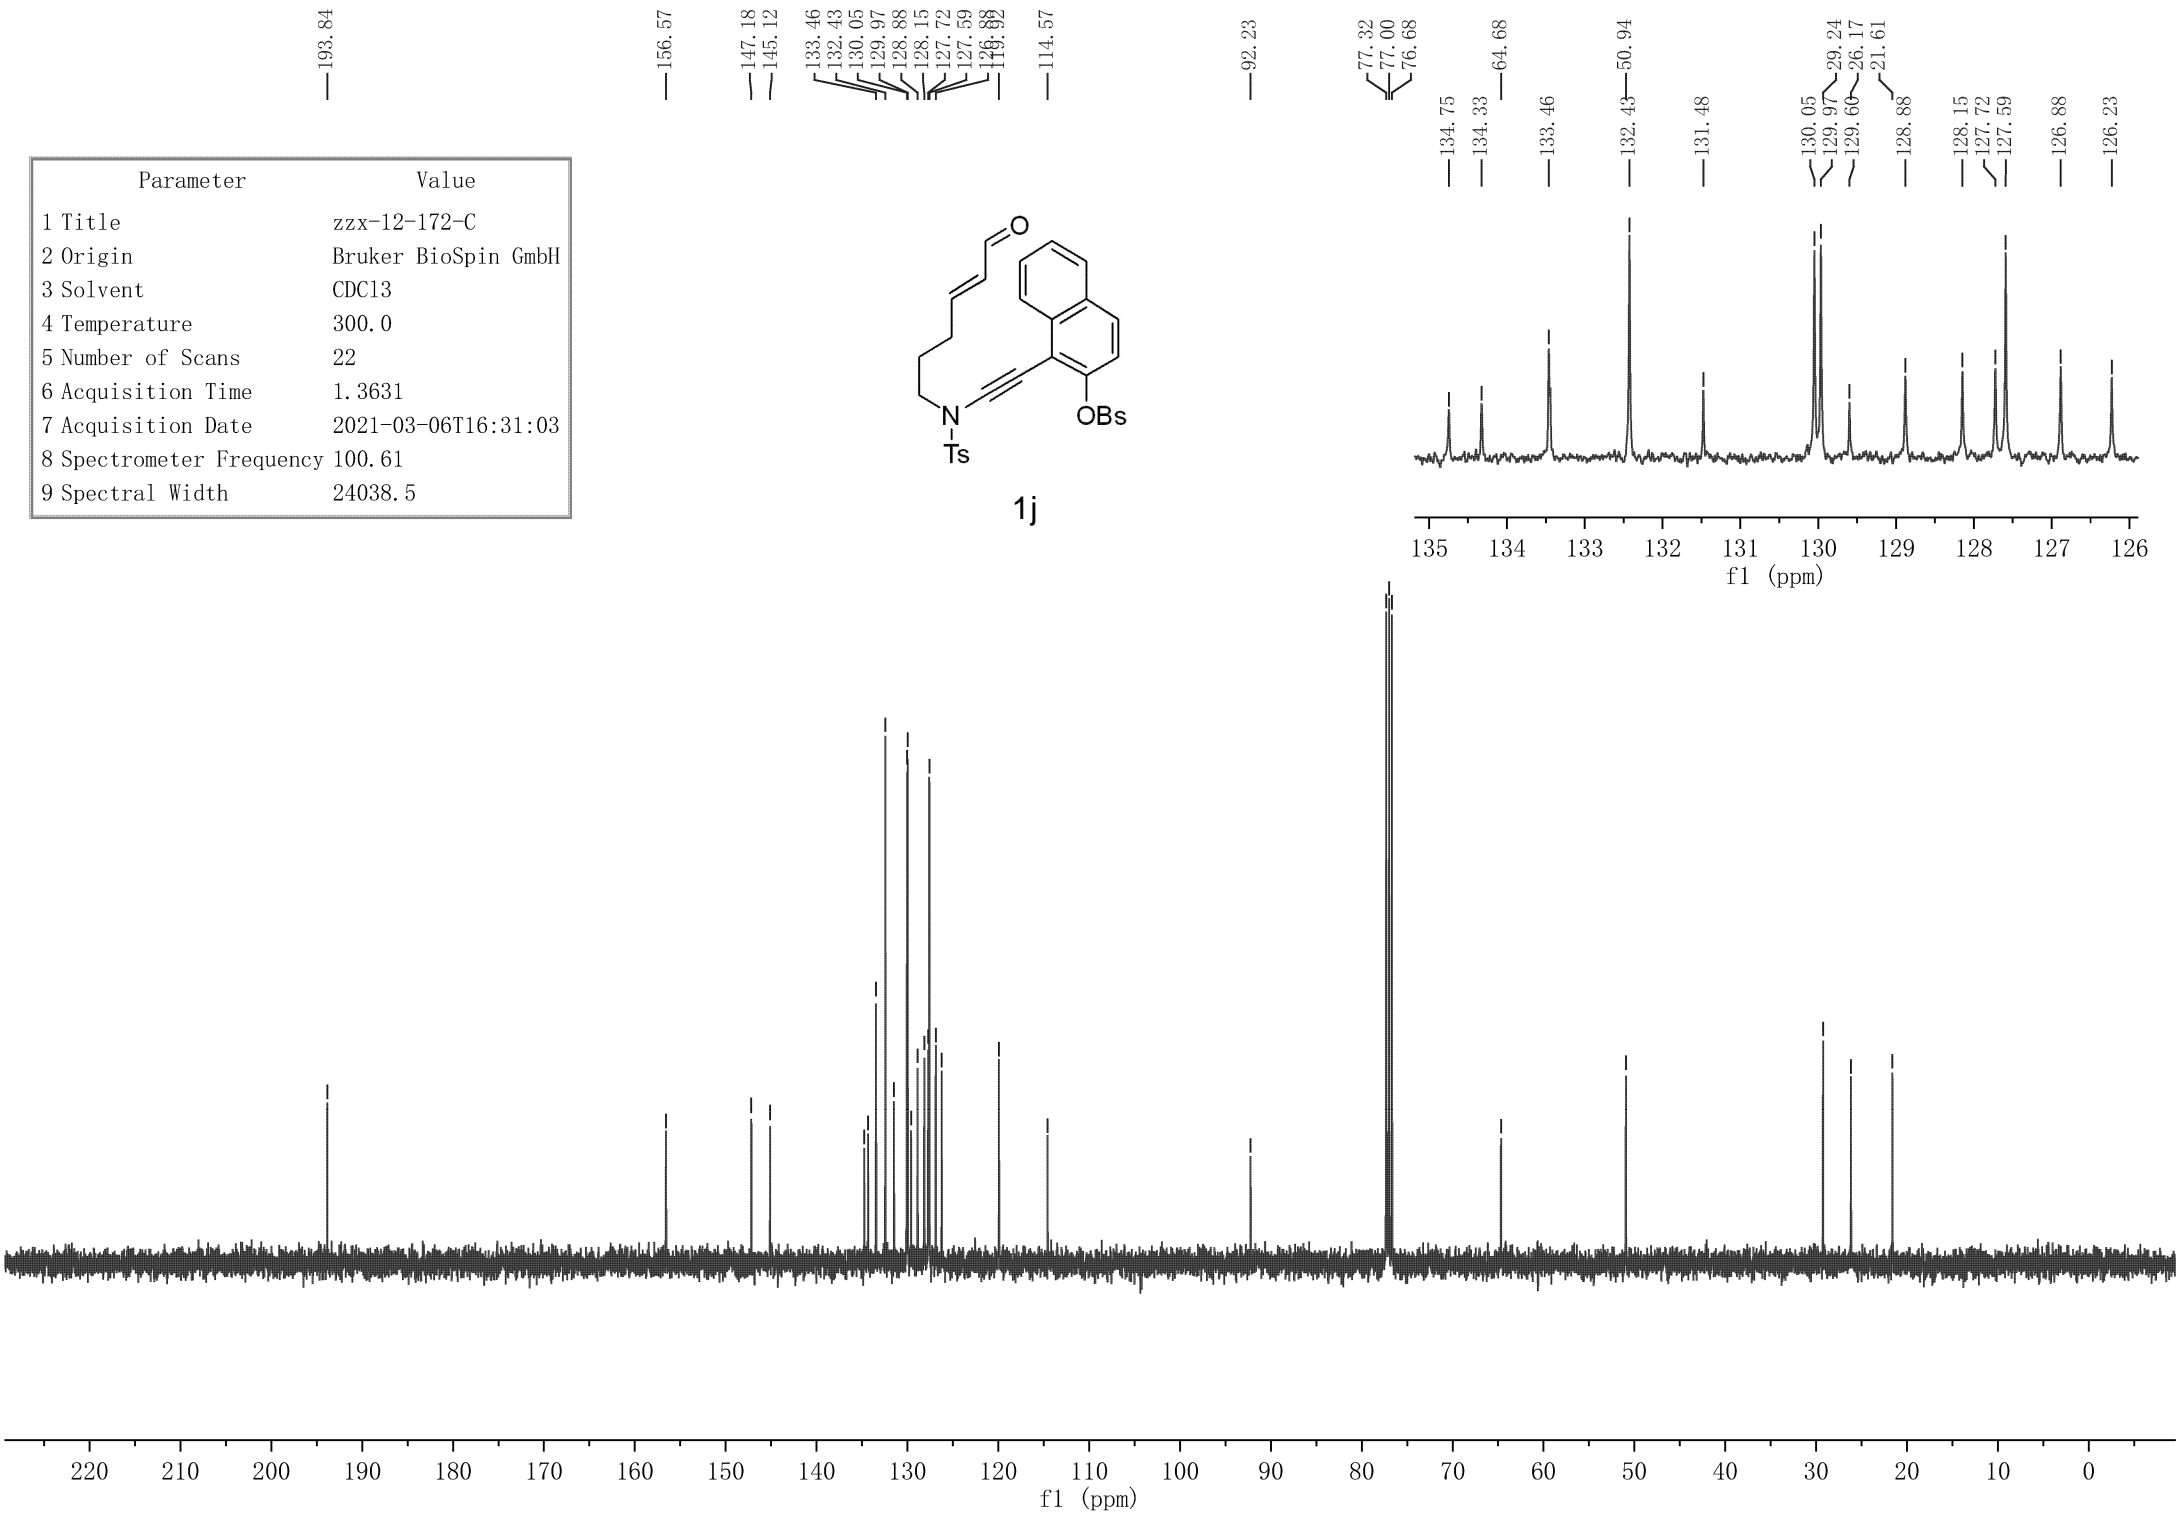

| Parameter                | Value               |
|--------------------------|---------------------|
| 1 Title                  | ZZX-12-122-H        |
| 2 Origin                 | Bruker BioSpin GmbH |
| 3 Solvent                | CDC13               |
| 4 Temperature            | 298.0               |
| 5 Number of Scans        | 9                   |
| 6 Acquisition Time       | 4.0894              |
| 7 Acquisition Date       | 2021-02-01T10:02:44 |
| 8 Spectrometer Frequency | 400.13              |
| 9 Spectral Width         | 8012.8              |

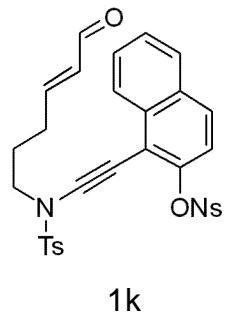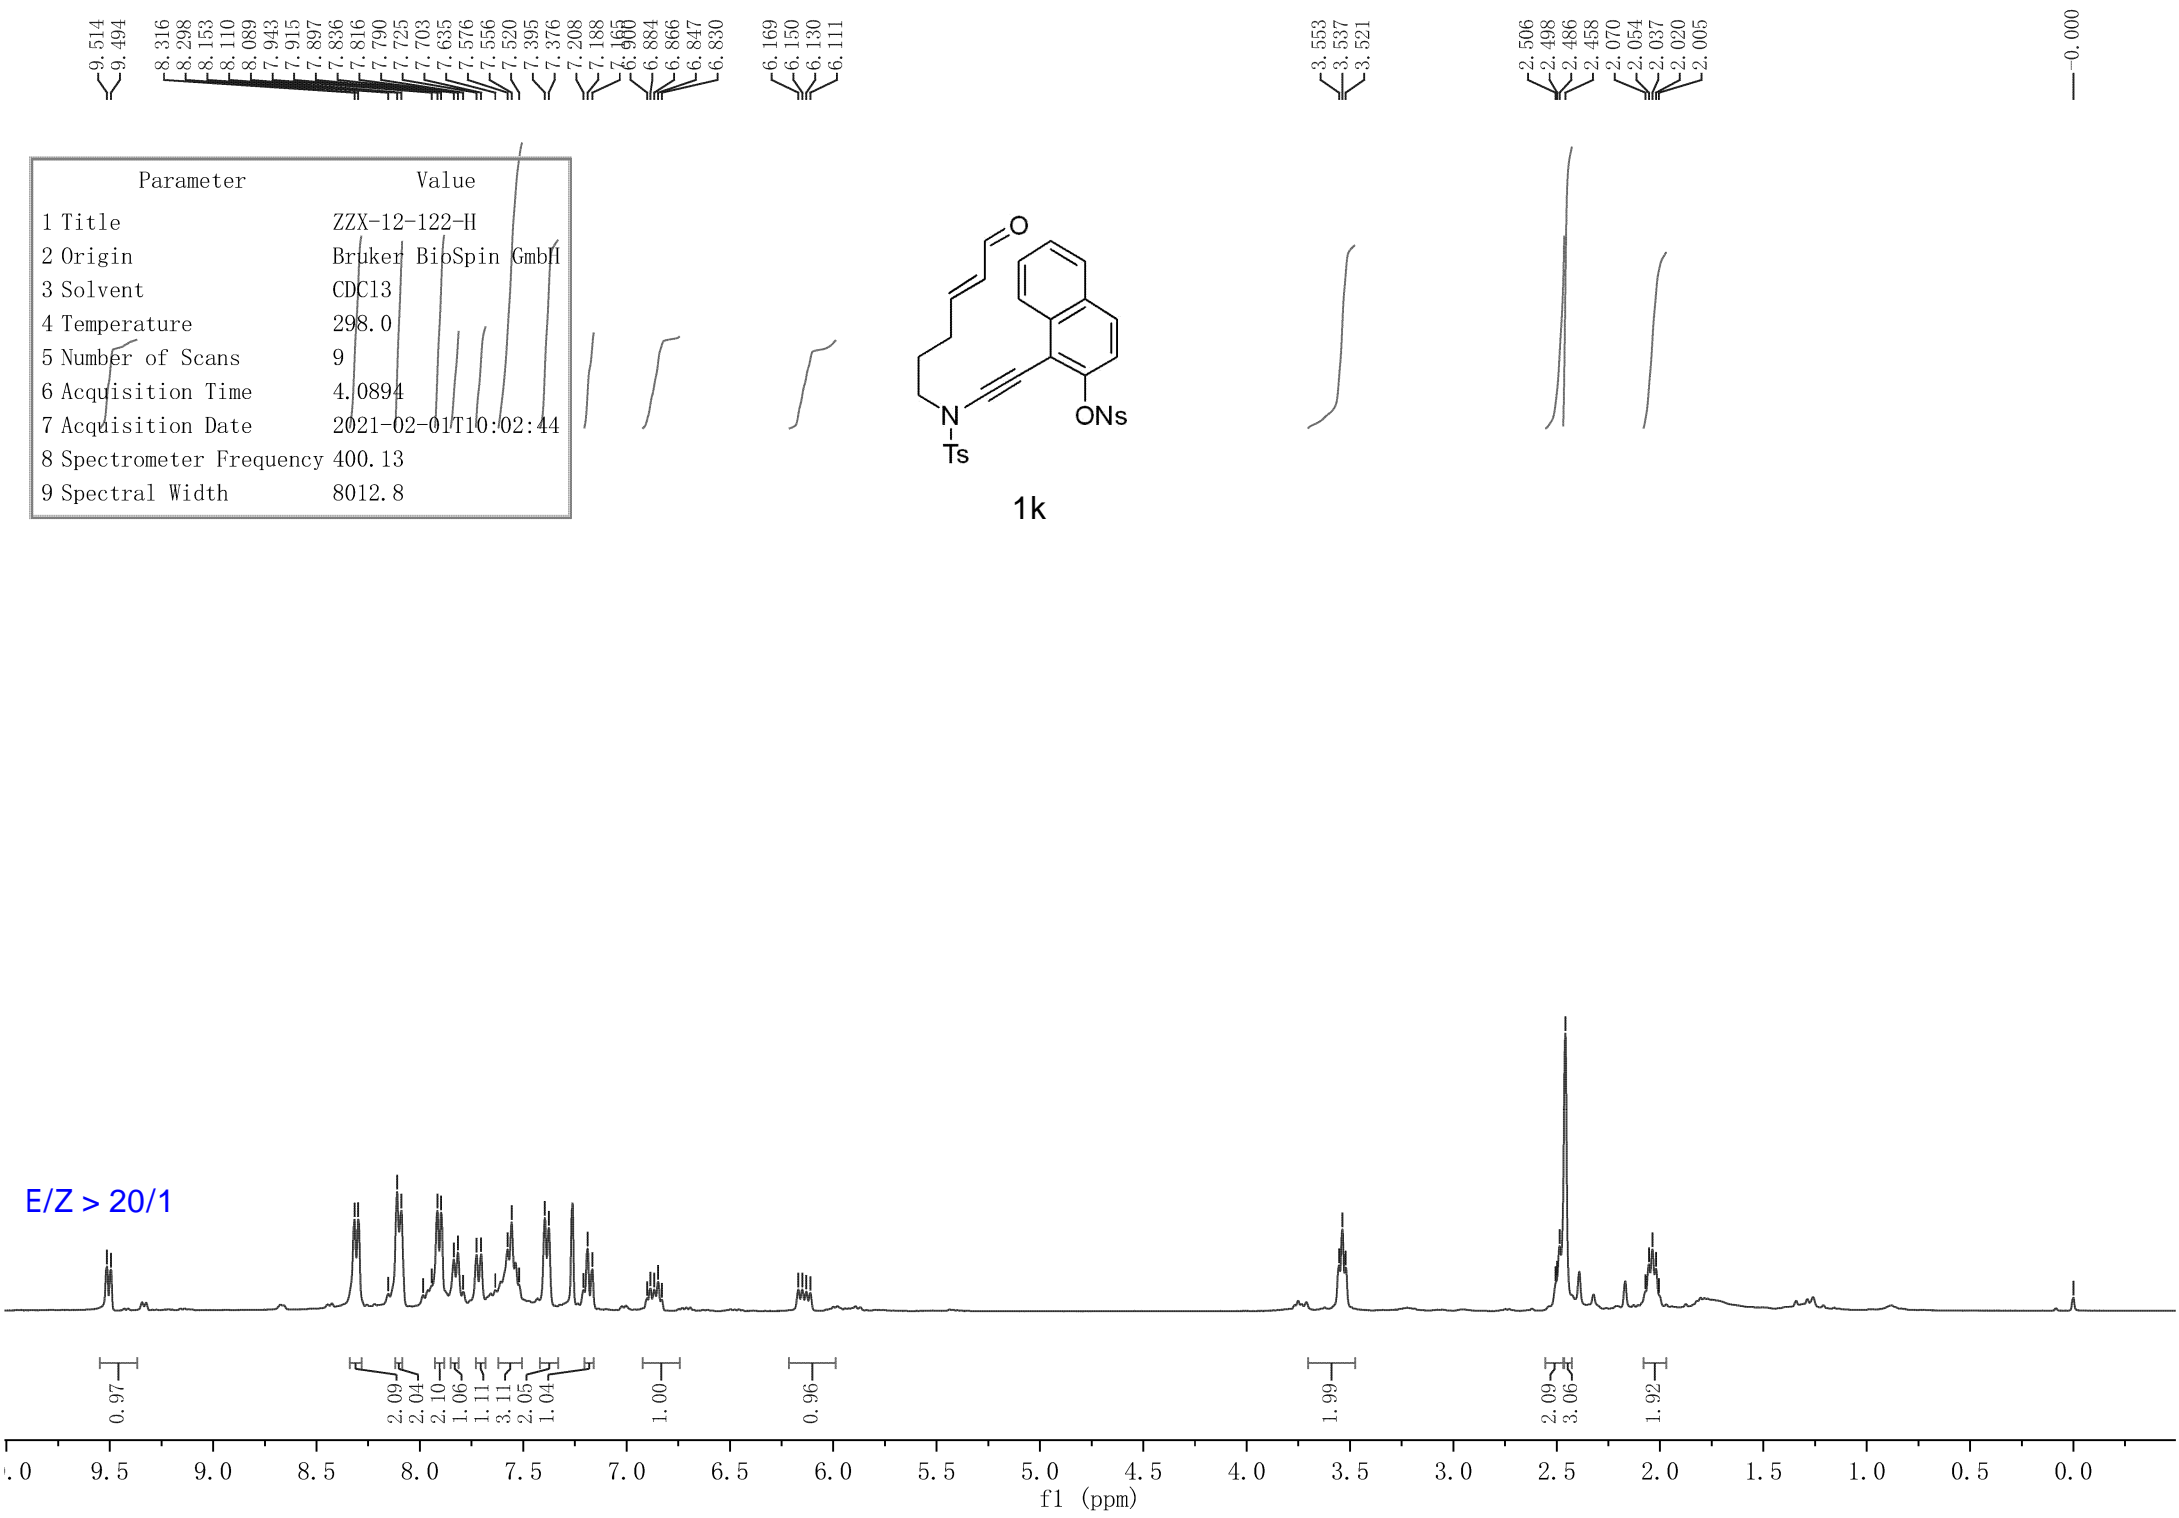

9.514, 9.494, 8.316, 8.298, 8.153, 8.110, 8.089, 7.943, 7.915, 7.897, 7.836, 7.816, 7.790, 7.725, 7.703, 7.635, 7.576, 7.556, 7.520, 7.395, 7.376, 7.208, 7.188, 7.165, 7.165, 6.884, 6.866, 6.847, 6.830, 6.169, 6.150, 6.130, 6.111, 3.553, 3.537, 3.521, 2.506, 2.498, 2.486, 2.458, 2.070, 2.054, 2.037, 2.020, 2.005, 0.000

| Parameter                | Value               |
|--------------------------|---------------------|
| 1 Title                  | ZZX-12-122-C        |
| 2 Origin                 | Bruker BioSpin GmbH |
| 3 Solvent                | CDC13               |
| 4 Temperature            | 300.0               |
| 5 Number of Scans        | 134                 |
| 6 Acquisition Time       | 1.3631              |
| 7 Acquisition Date       | 2021-02-01T10:06:38 |
| 8 Spectrometer Frequency | 100.61              |
| 9 Spectral Width         | 24038.5             |

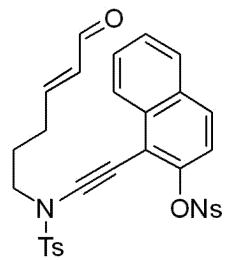

1k

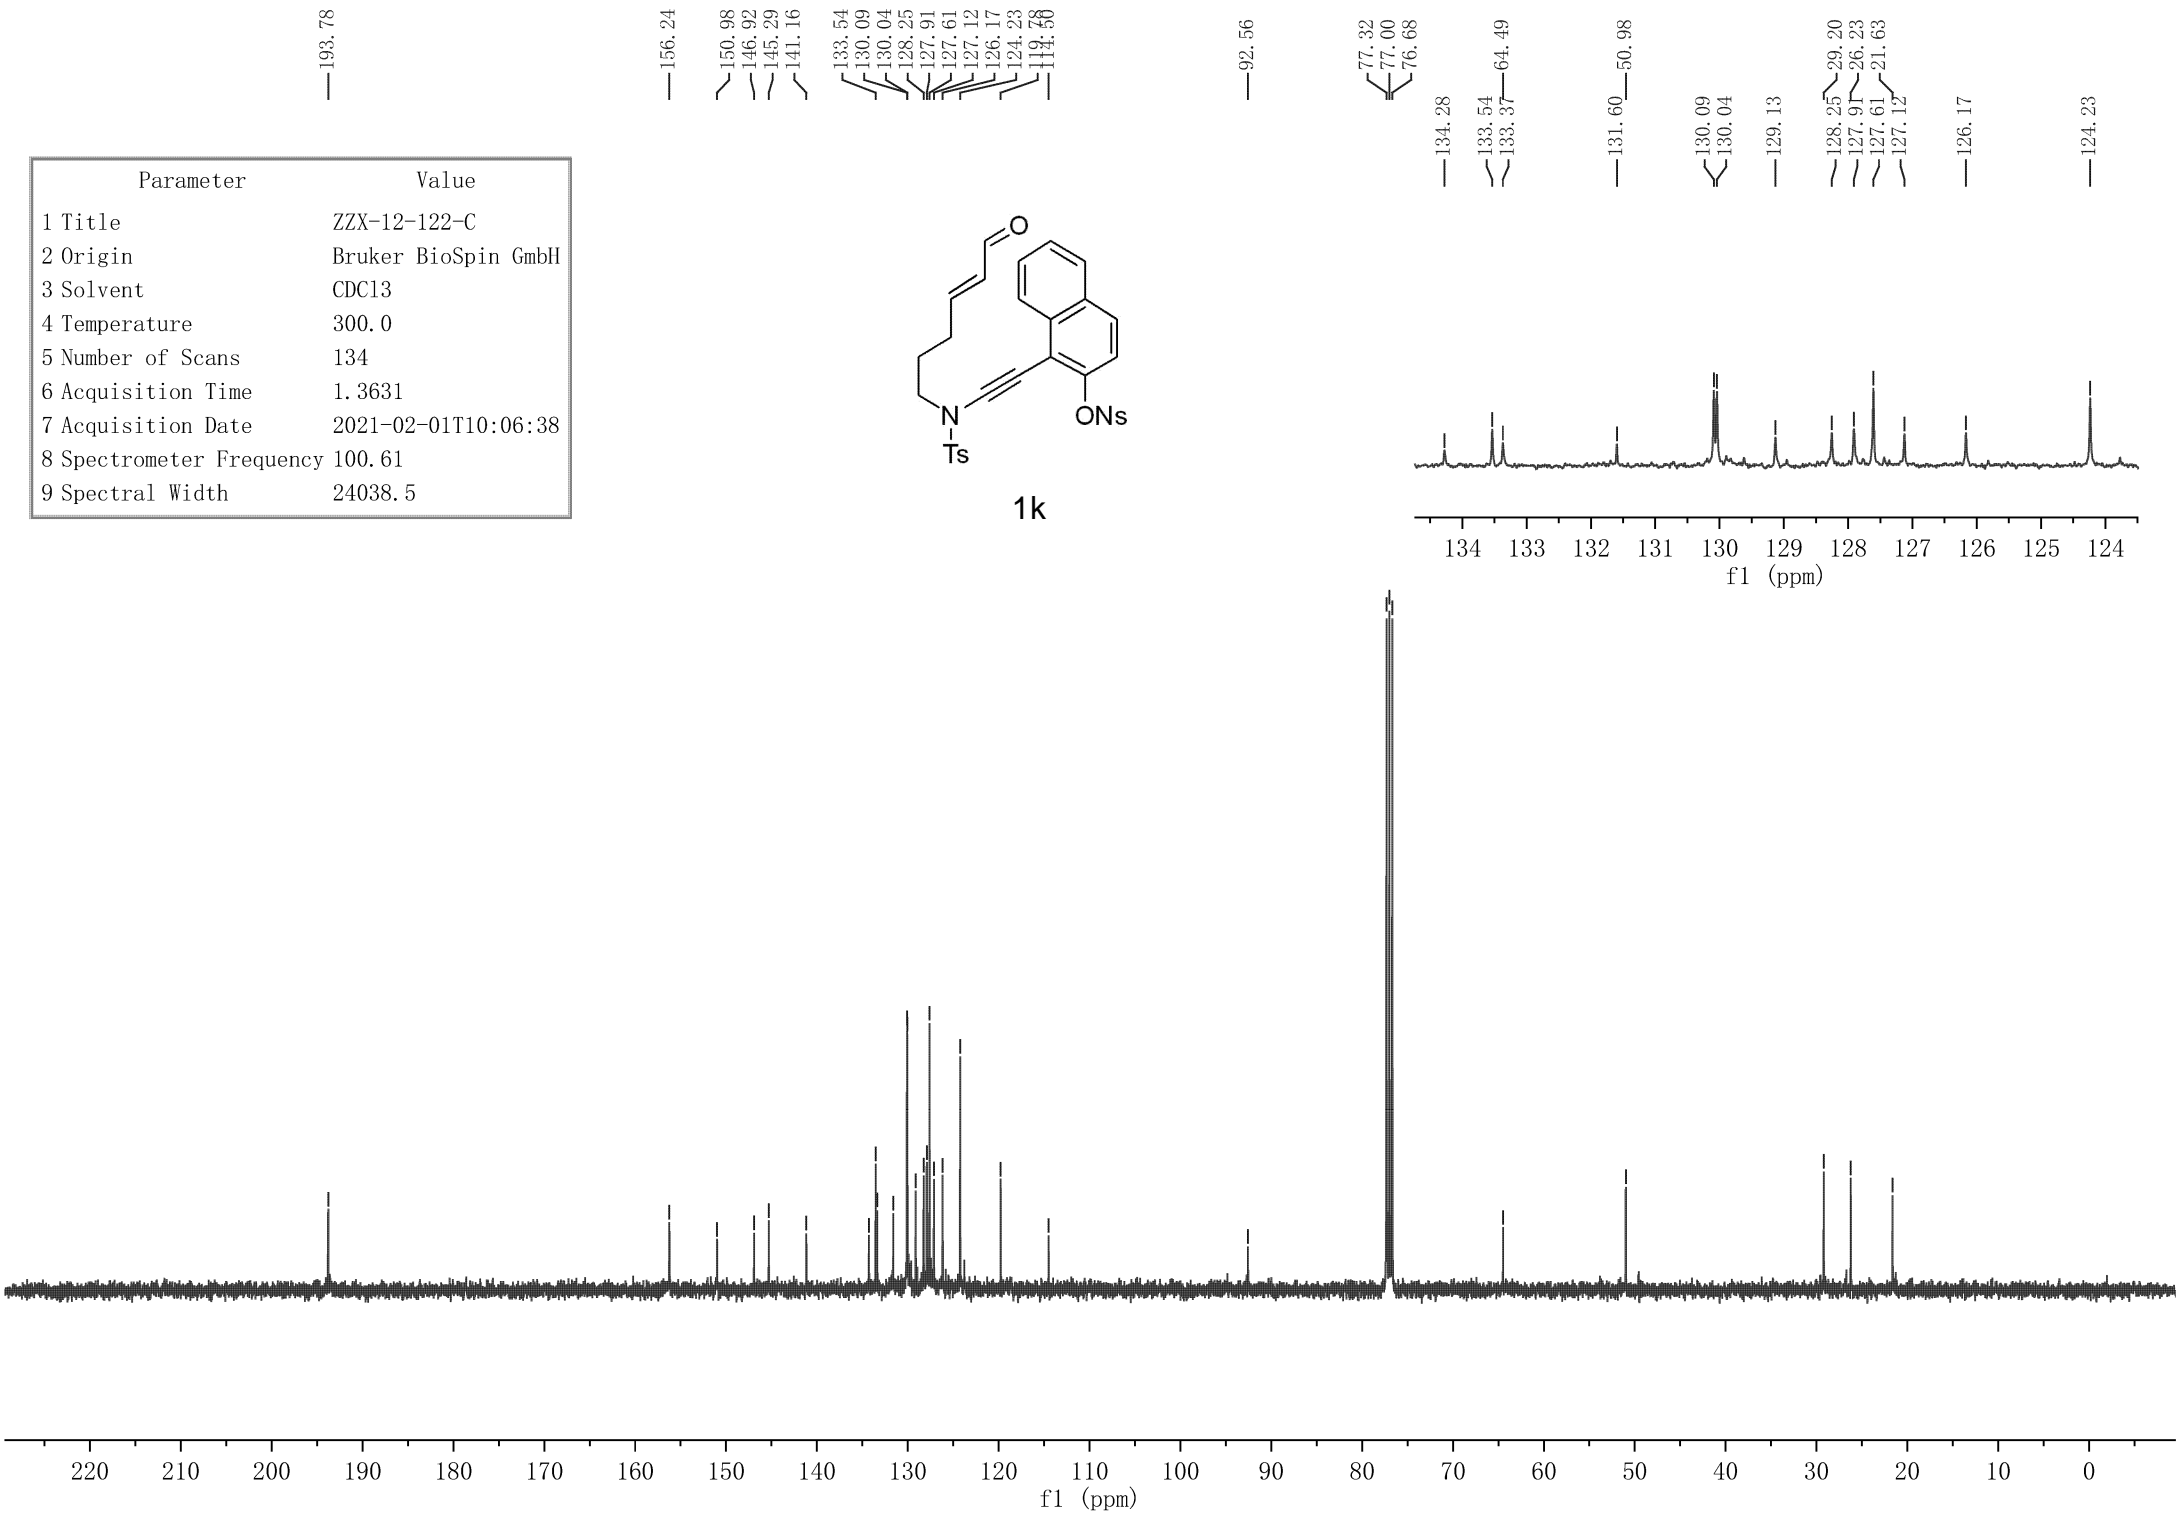

9.496  
9.476

8.311  
8.290

7.890  
7.869

7.849  
7.814

7.678  
7.655

7.345  
7.321

6.999  
6.901

6.884  
6.865

6.845  
6.828

6.140  
6.121

6.101  
6.081

3.559  
3.542  
3.524

2.485  
2.468  
2.445

2.085  
2.068  
2.050

2.031  
2.013

0.000

| Parameter                | Value               |
|--------------------------|---------------------|
| 1 Title                  | ZZX-12-99           |
| 2 Origin                 |                     |
| 3 Solvent                | CDC13               |
| 4 Temperature            | 297.1               |
| 5 Number of Scans        | 16                  |
| 6 Acquisition Time       | 4.0002              |
| 7 Acquisition Date       | 2022-03-18T10:02:31 |
| 8 Spectrometer Frequency | 399.93              |
| 9 Spectral Width         | 8012.0              |

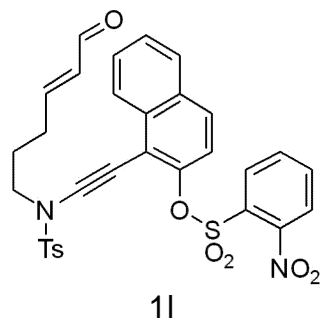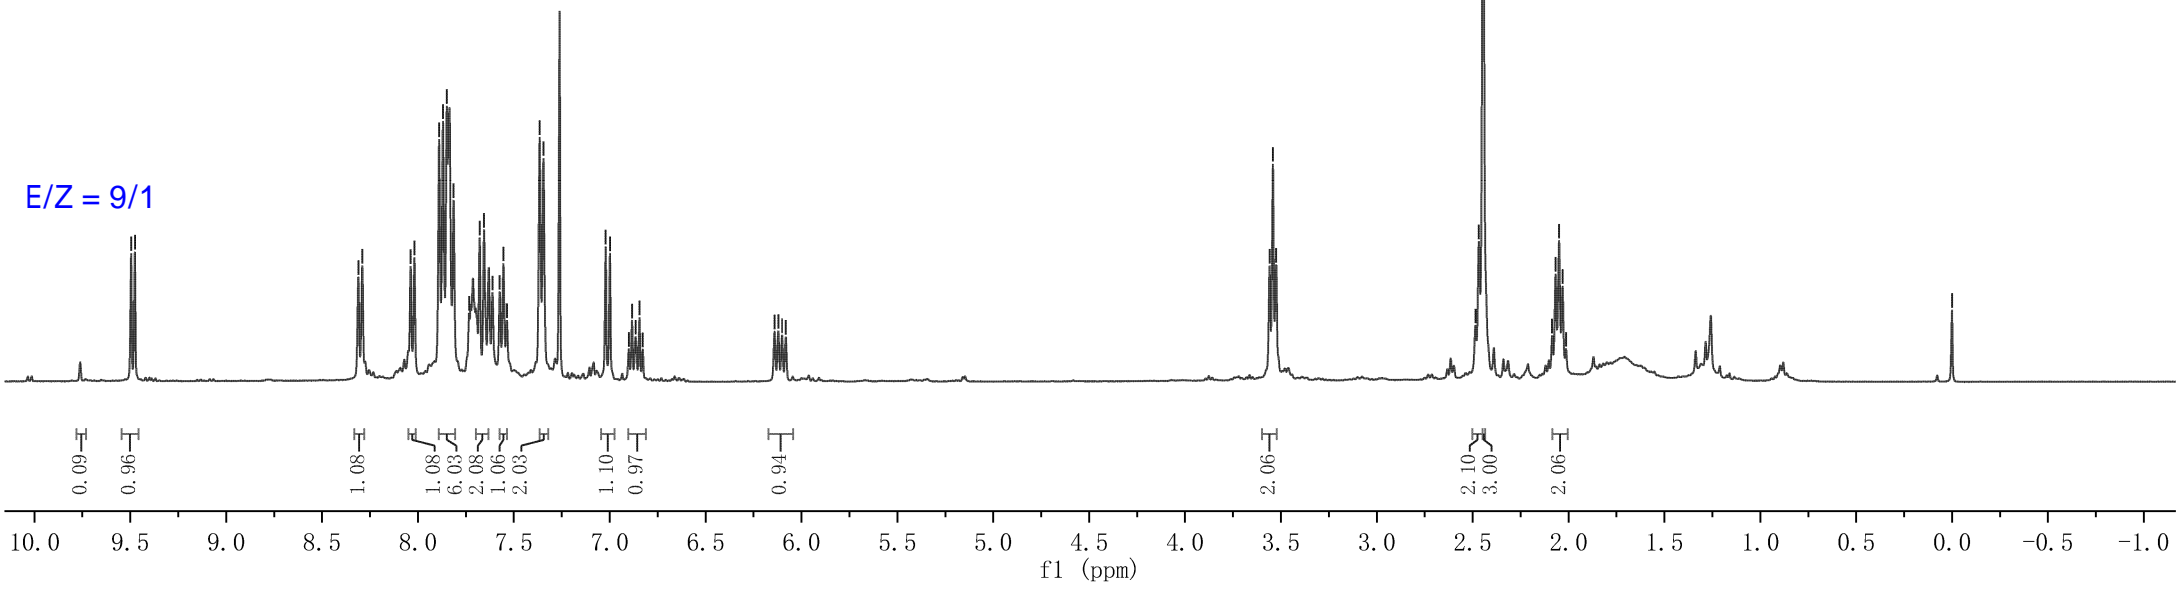

| Parameter                | Value               |
|--------------------------|---------------------|
| 1 Title                  | ZZX-12-99-C         |
| 2 Origin                 |                     |
| 3 Solvent                | CDC13               |
| 4 Temperature            | 296.4               |
| 5 Number of Scans        | 1024                |
| 6 Acquisition Time       | 1.0000              |
| 7 Acquisition Date       | 2022-03-19T01:07:14 |
| 8 Spectrometer Frequency | 100.56              |
| 9 Spectral Width         | 26041.0             |

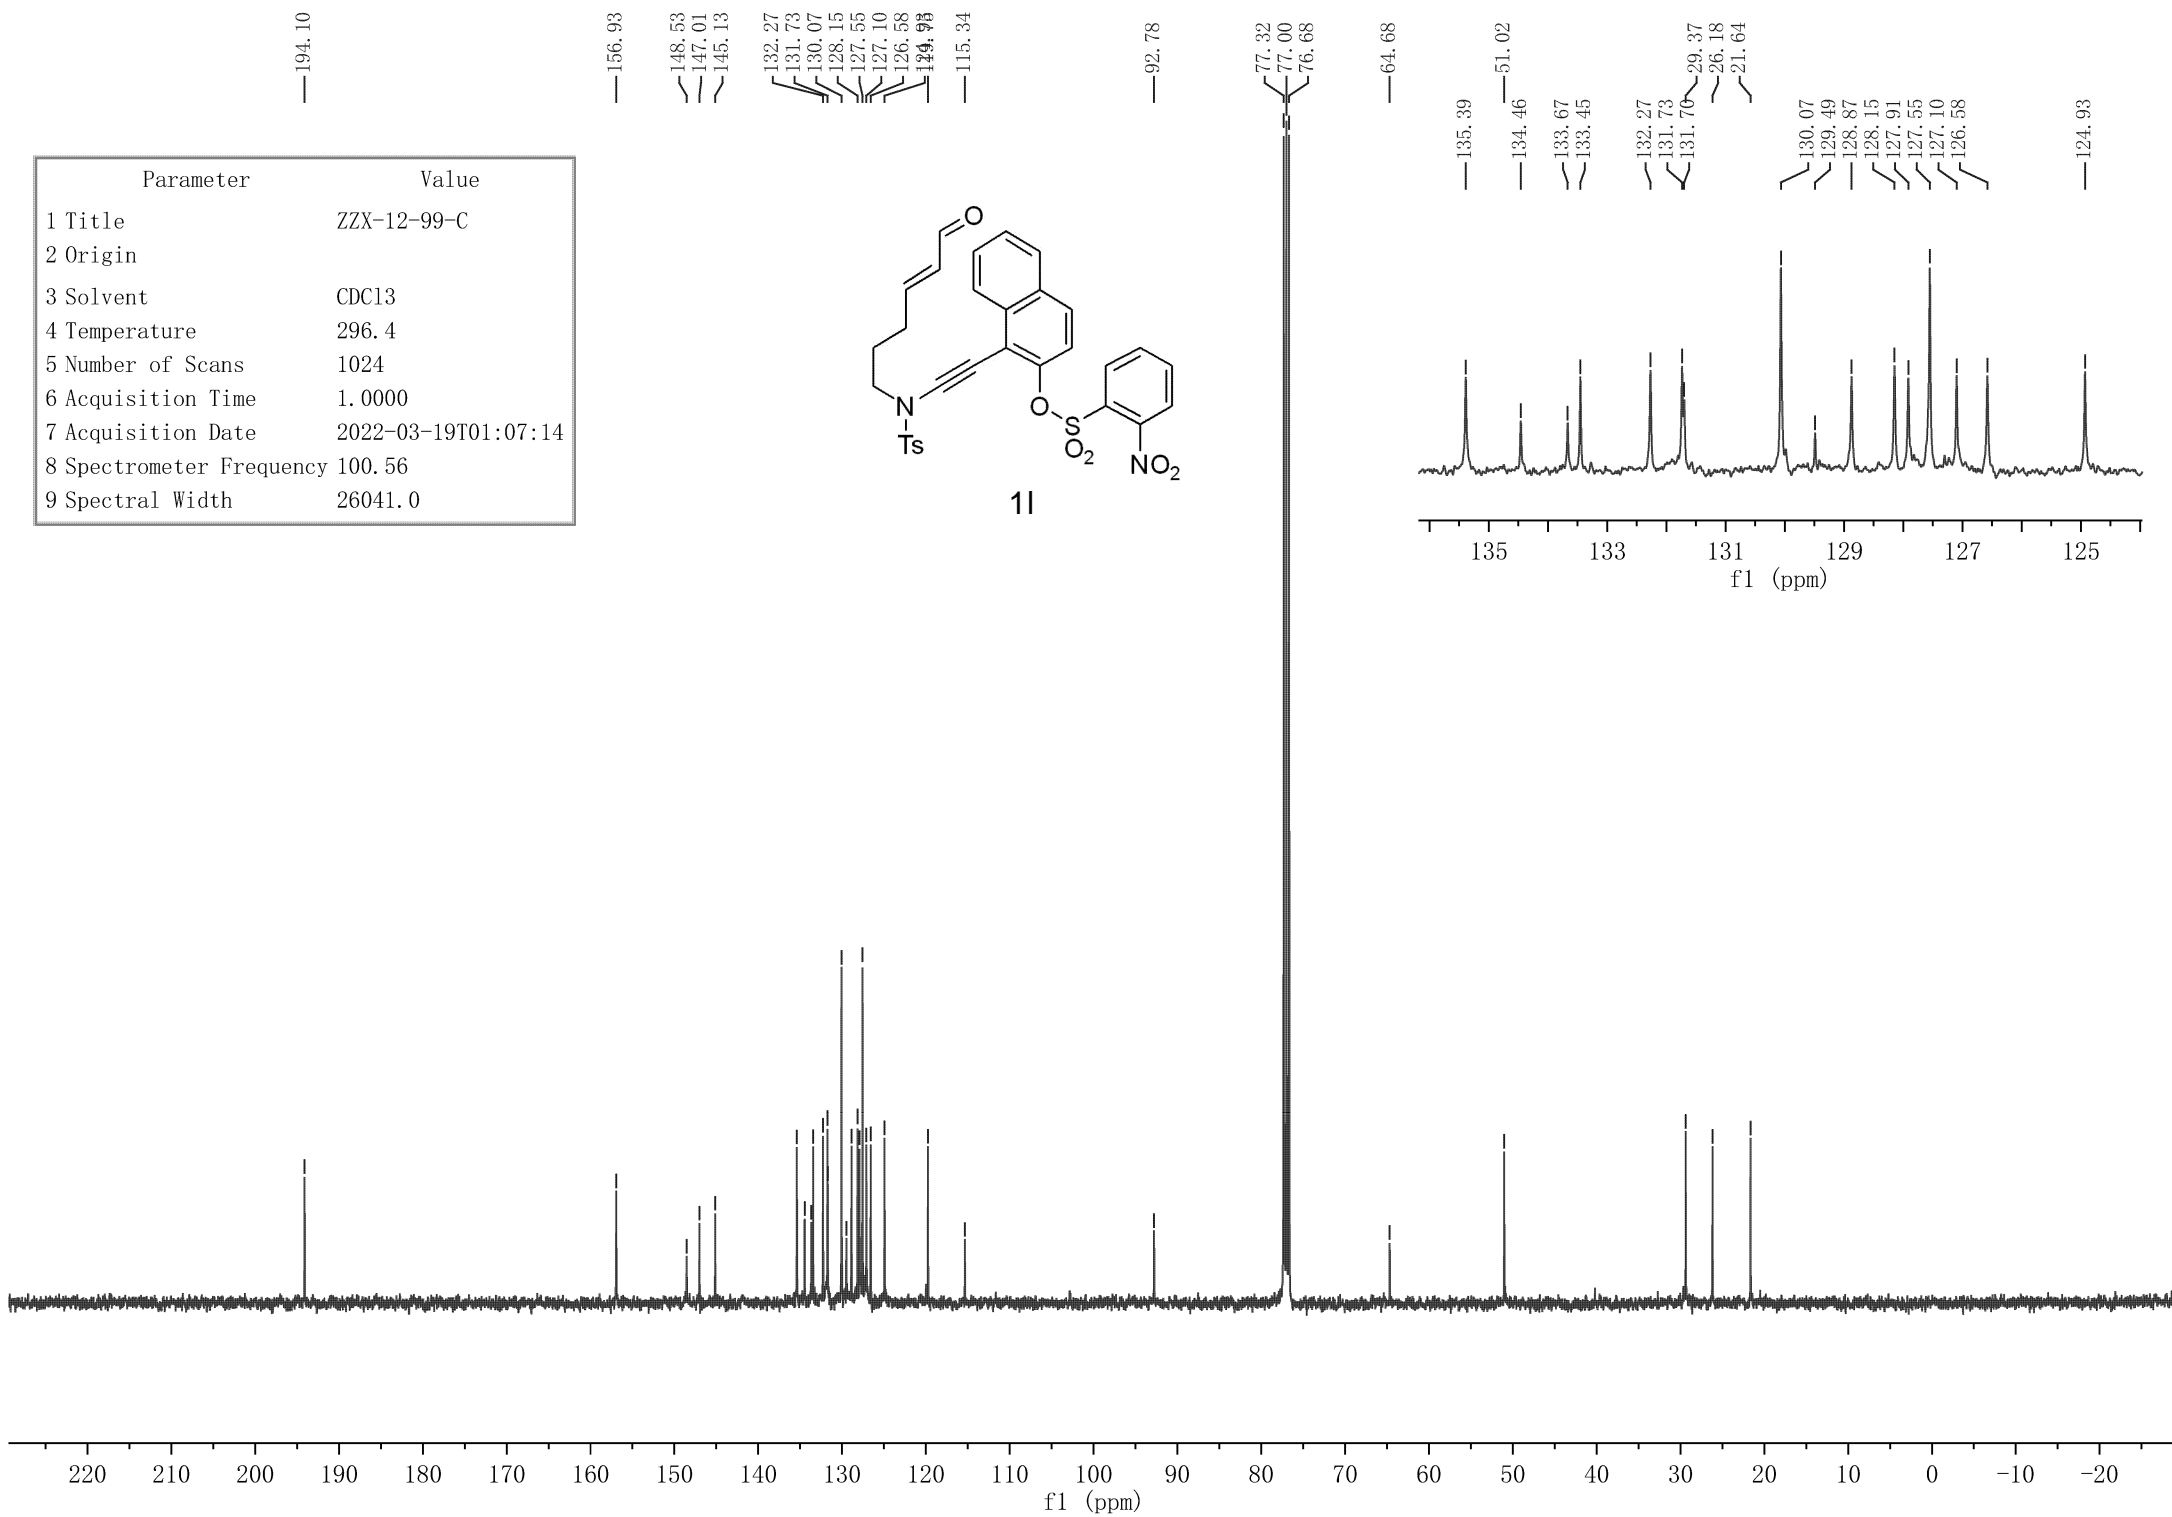

9.489  
9.469  
8.812  
8.791  
8.313  
8.160  
8.140  
8.120  
8.101  
7.975  
7.933  
7.915  
7.713  
7.478  
7.421  
7.375  
6.963  
6.889  
6.850  
6.833  
6.454  
6.431  
6.149  
6.129  
6.107  
6.087

3.512  
3.495  
3.477  
2.484  
2.466  
2.443  
2.091  
2.054  
2.036  
2.019  
0.000

| Parameter                | Value               |
|--------------------------|---------------------|
| 1 Title                  | ZZX-18-55           |
| 2 Origin                 |                     |
| 3 Solvent                | CDC13               |
| 4 Temperature            | 296.2               |
| 5 Number of Scans        | 16                  |
| 6 Acquisition Time       | 4.0002              |
| 7 Acquisition Date       | 2023-02-21T21:11:26 |
| 8 Spectrometer Frequency | 399.90              |
| 9 Spectral Width         | 8012.0              |

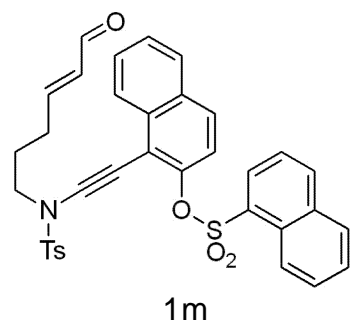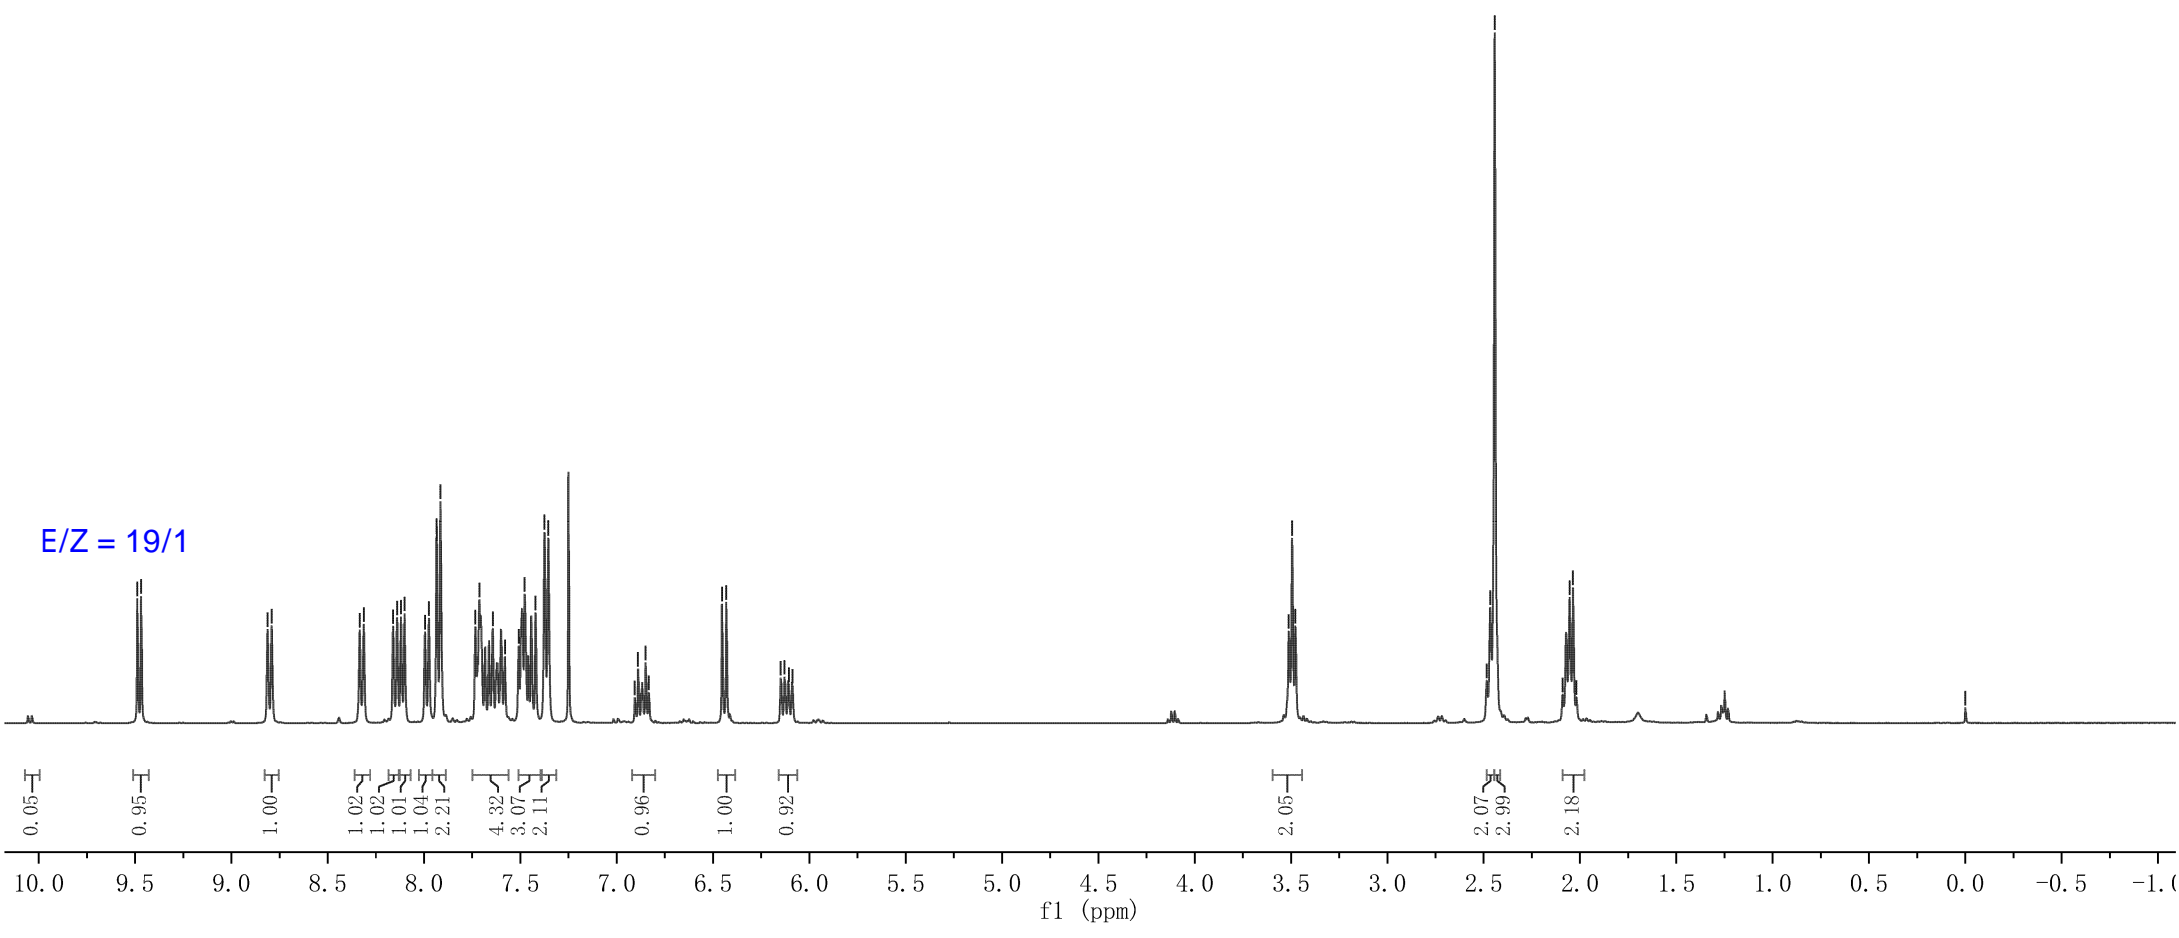



| Parameter                | Value               |
|--------------------------|---------------------|
| 1 Title                  | ZZX-18-55           |
| 2 Origin                 |                     |
| 3 Solvent                | CDC13               |
| 4 Temperature            | 296.3               |
| 5 Number of Scans        | 500                 |
| 6 Acquisition Time       | 1.0000              |
| 7 Acquisition Date       | 2023-02-21T21:30:39 |
| 8 Spectrometer Frequency | 100.56              |
| 9 Spectral Width         | 26041.0             |

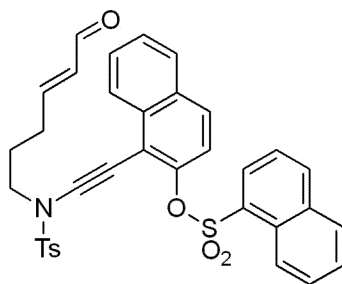

1m

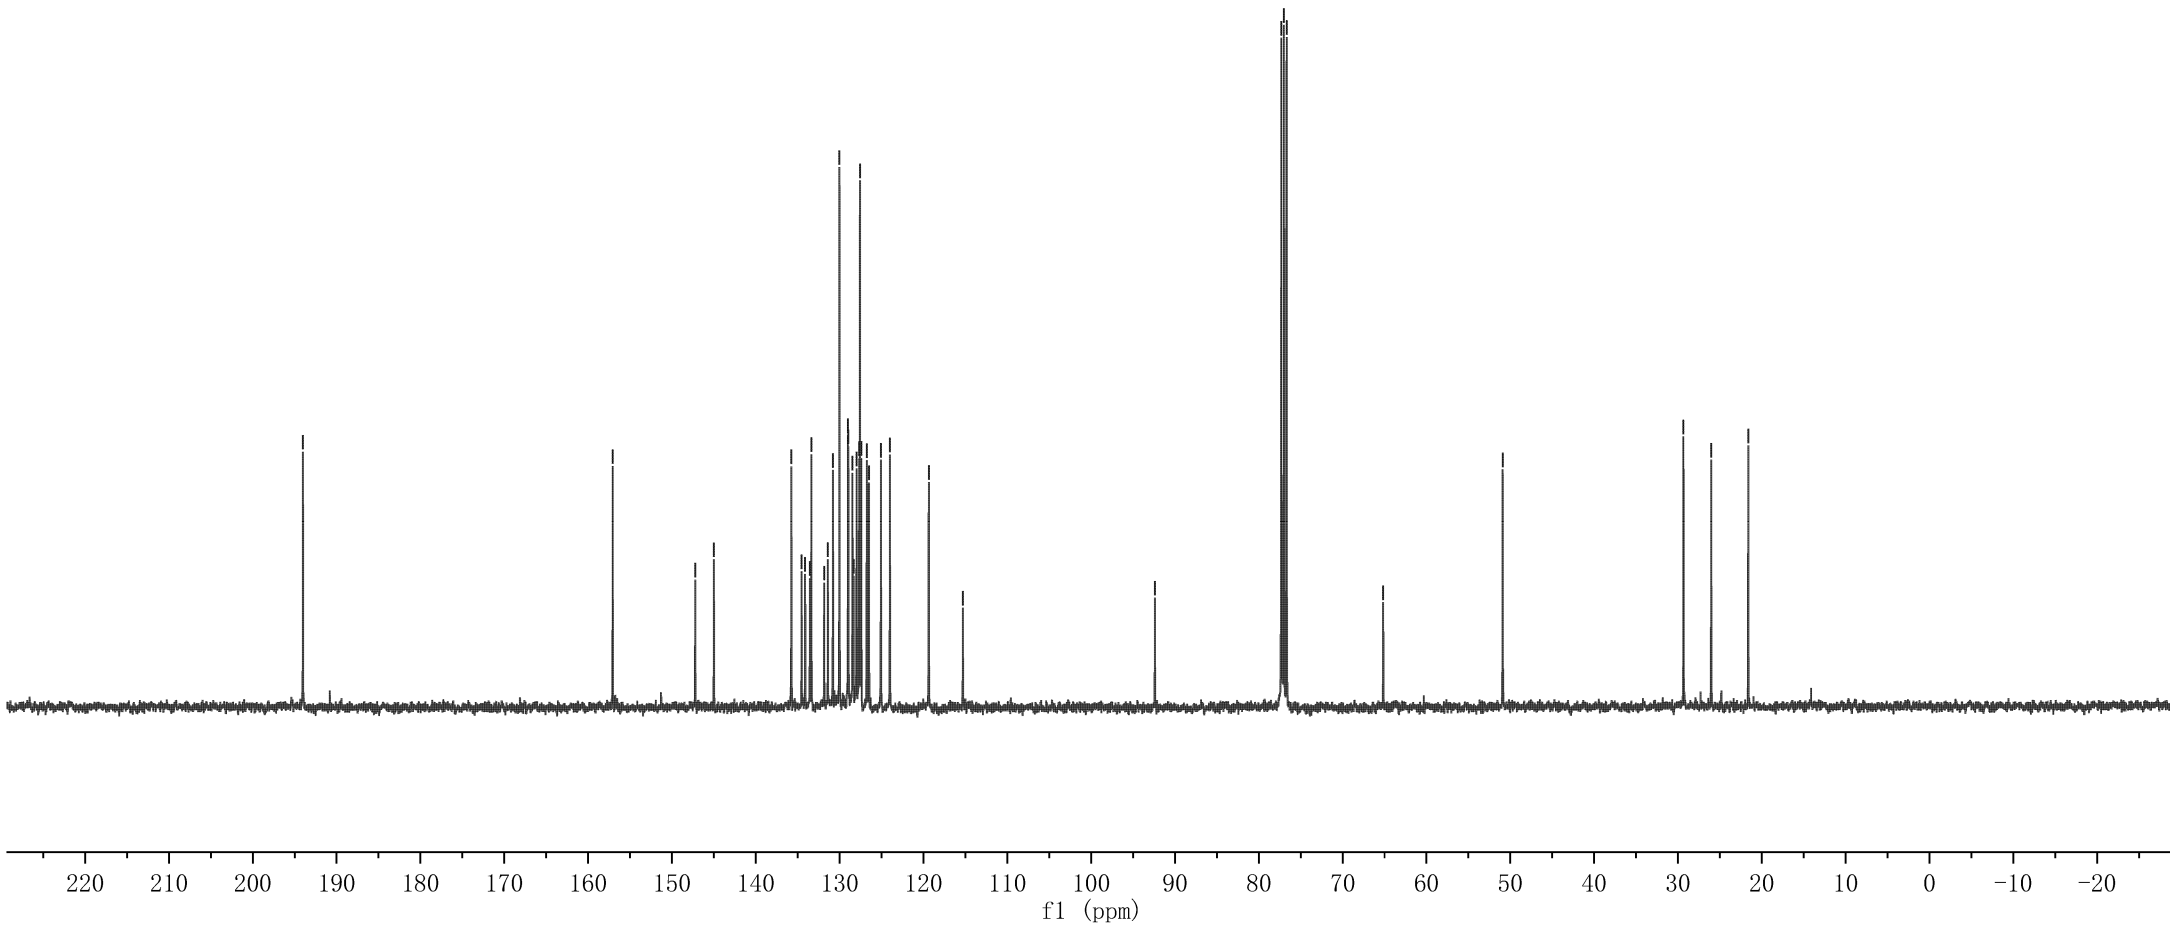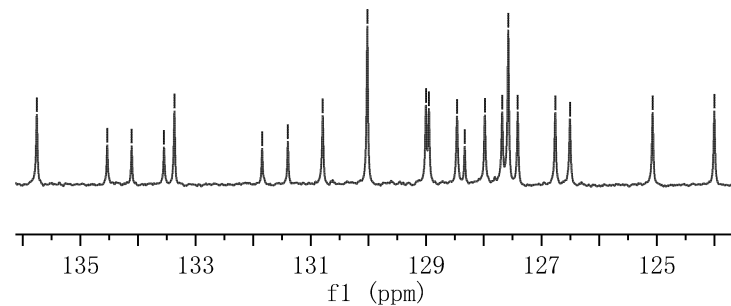

| Parameter                | Value               |
|--------------------------|---------------------|
| 1 Title                  | ZZX-12-187          |
| 2 Origin                 |                     |
| 3 Solvent                | CDC13               |
| 4 Temperature            | 298.0               |
| 5 Number of Scans        | 16                  |
| 6 Acquisition Time       | 4.0002              |
| 7 Acquisition Date       | 2022-03-18T18:08:31 |
| 8 Spectrometer Frequency | 399.93              |
| 9 Spectral Width         | 8012.0              |

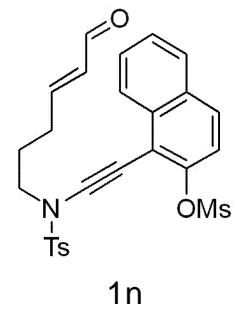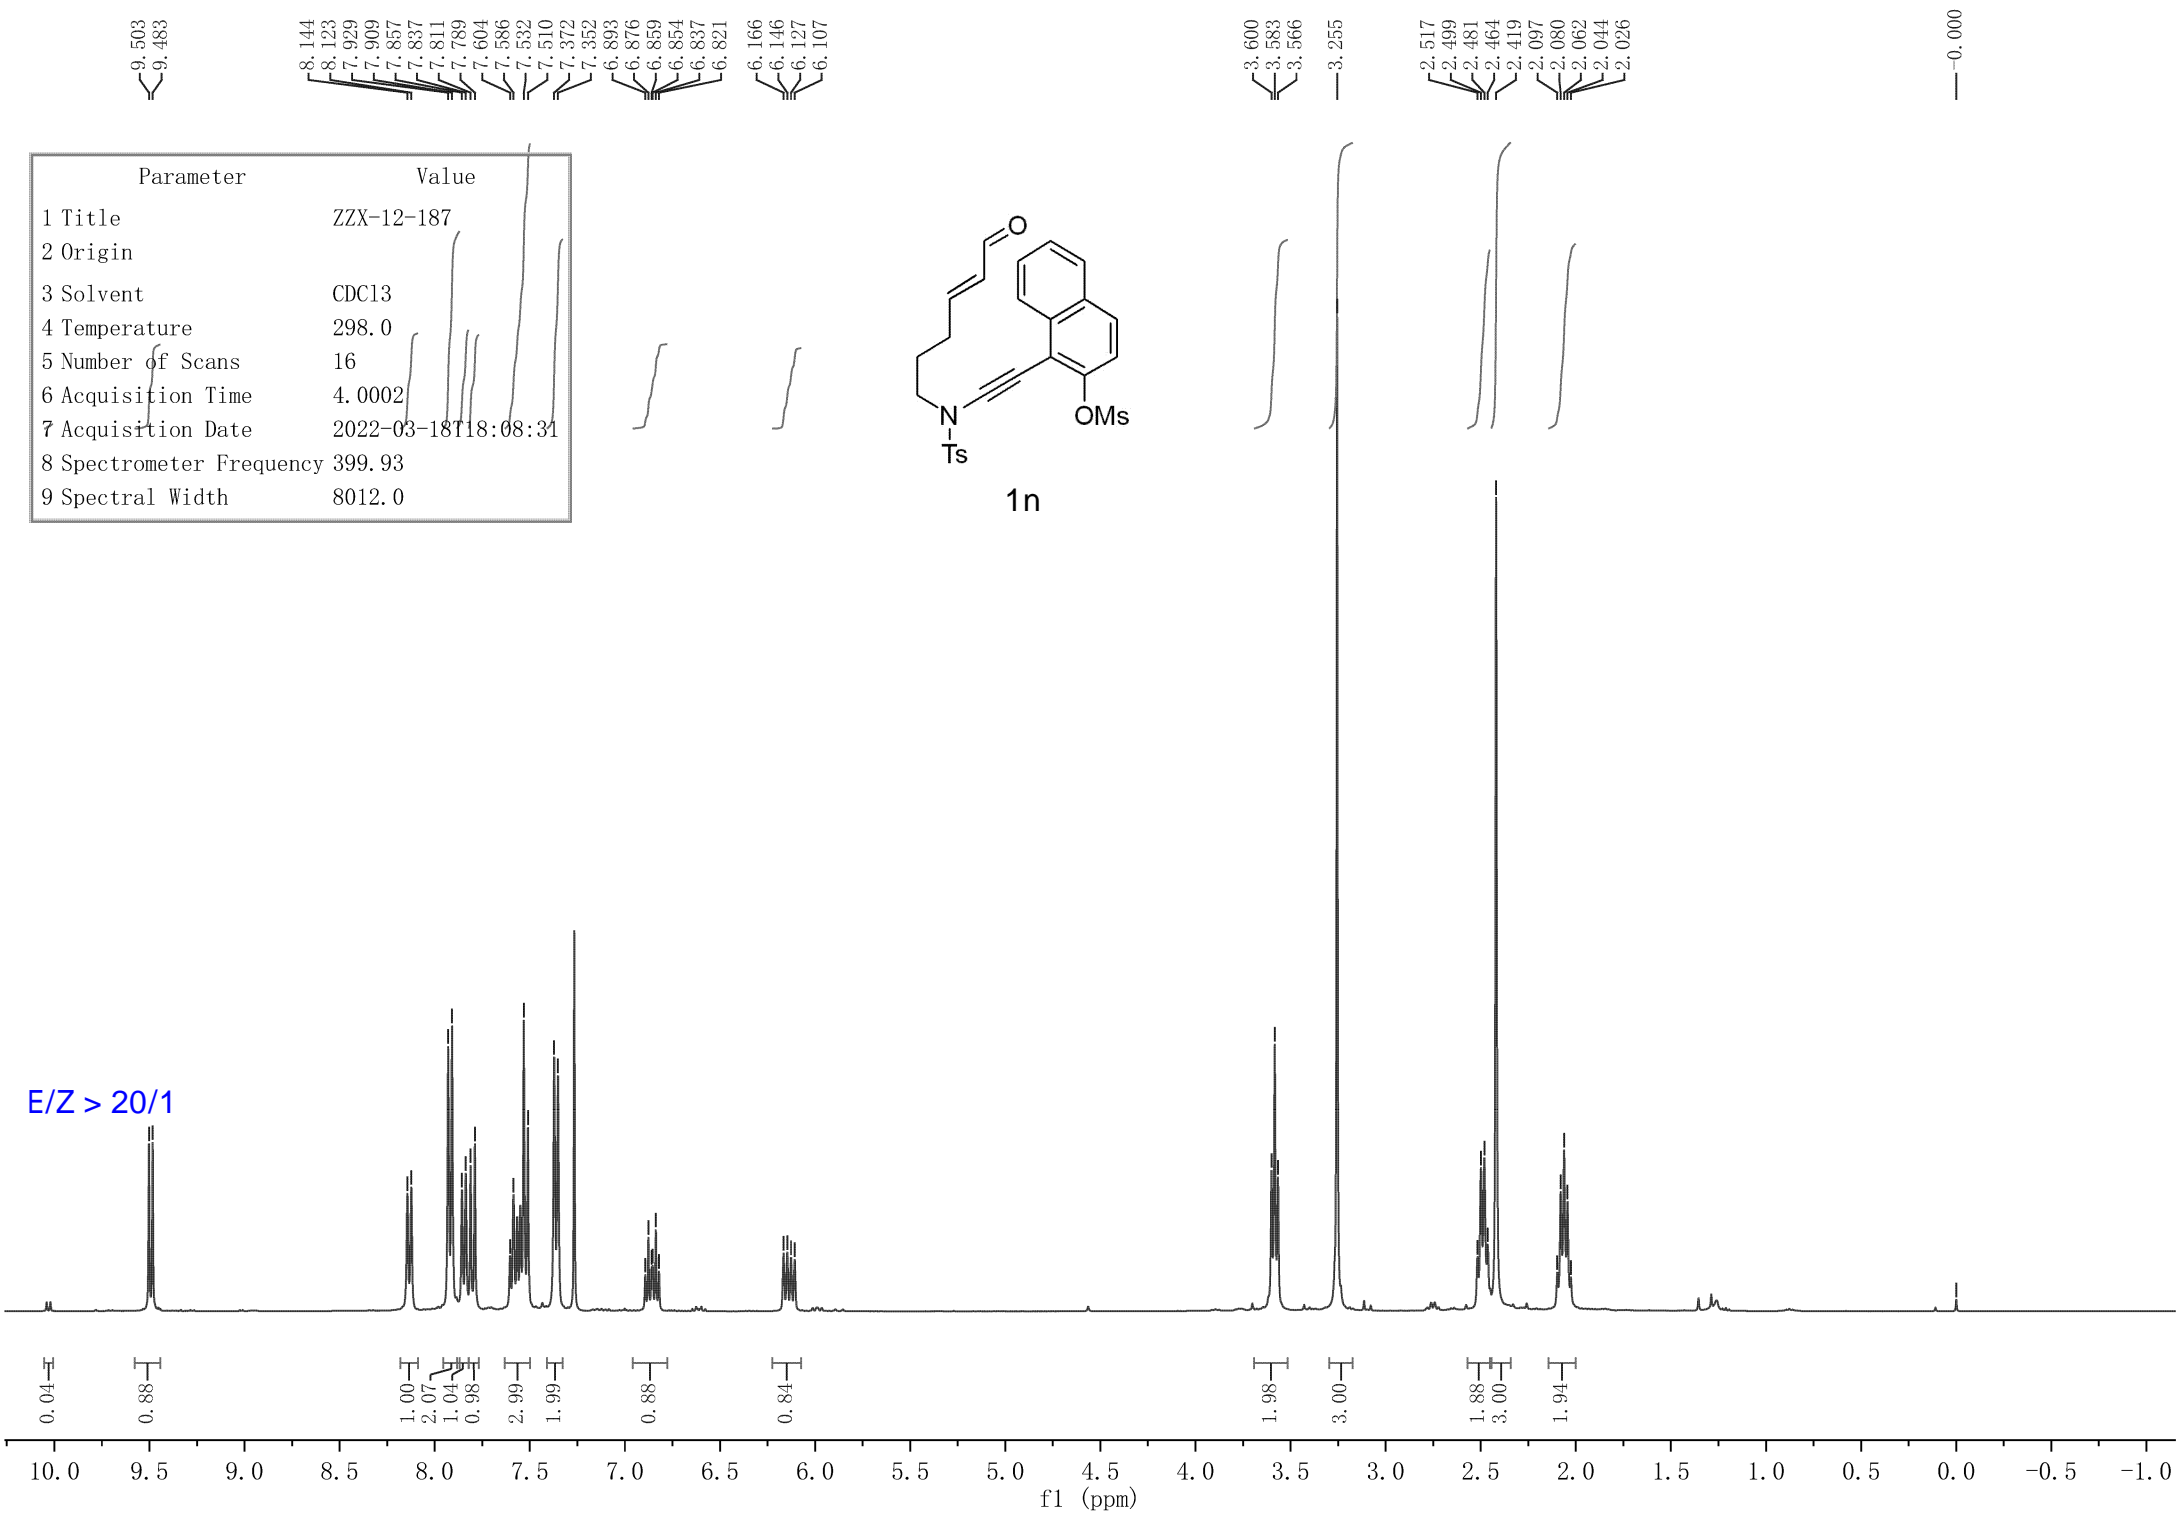

| Parameter                | Value               |
|--------------------------|---------------------|
| 1 Title                  | ZZX-12-187          |
| 2 Origin                 |                     |
| 3 Solvent                | CDC13               |
| 4 Temperature            | 298.0               |
| 5 Number of Scans        | 16                  |
| 6 Acquisition Time       | 4.0002              |
| 7 Acquisition Date       | 2022-03-18T18:08:31 |
| 8 Spectrometer Frequency | 399.93              |
| 9 Spectral Width         | 8012.0              |

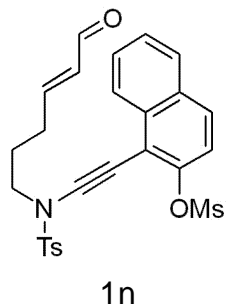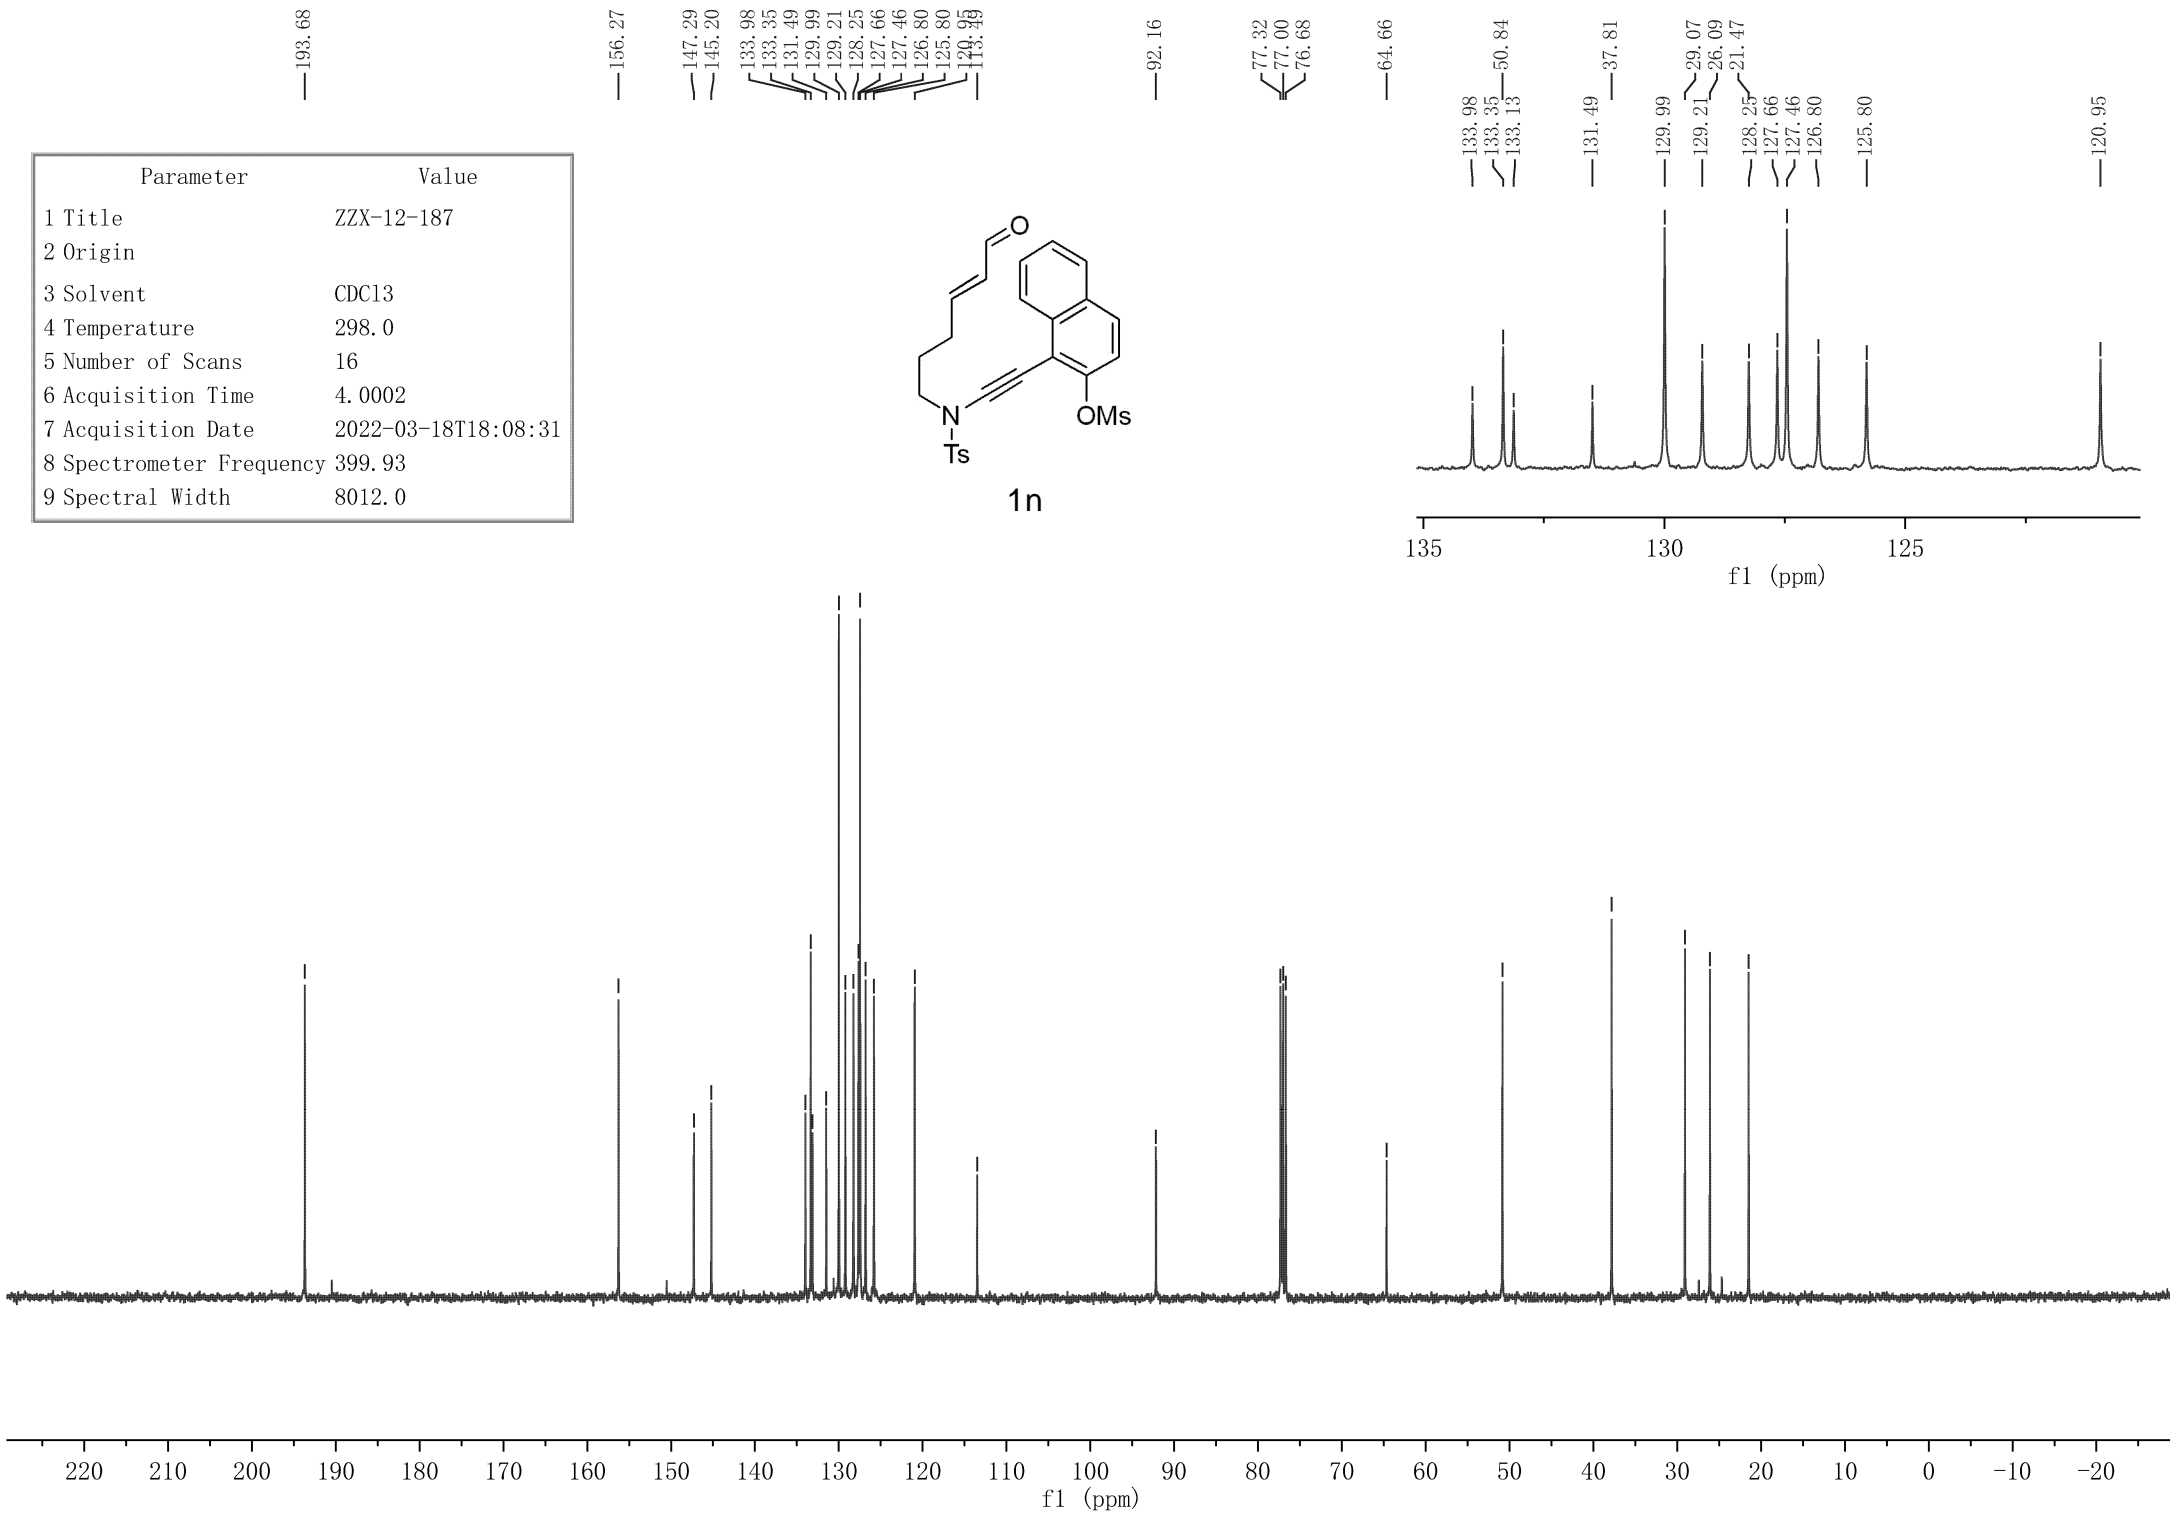

9.510  
9.491

8.380  
8.360

7.888  
7.867  
7.835  
7.812  
7.688  
7.605

7.358  
7.337  
7.326  
6.864  
6.825  
6.808

6.162  
6.142  
6.122  
6.103

3.588  
3.570  
3.552

2.508  
2.487  
2.470  
2.436  
2.422  
2.080  
2.062  
2.044  
2.026  
2.008

0.000

| Parameter                | Value               |
|--------------------------|---------------------|
| 1 Title                  | zzx-12-130-H        |
| 2 Origin                 | Bruker BioSpin GmbH |
| 3 Solvent                | CDC13               |
| 4 Temperature            | 298.0               |
| 5 Number of Scans        | 9                   |
| 6 Acquisition Time       | 4.0894              |
| 7 Acquisition Date       | 2021-01-29 16:43:33 |
| 8 Spectrometer Frequency | 400.13              |
| 9 Spectral Width         | 8012.8              |

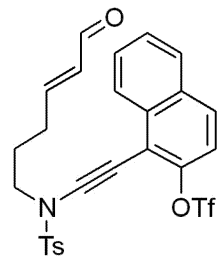

E/Z = 7/1

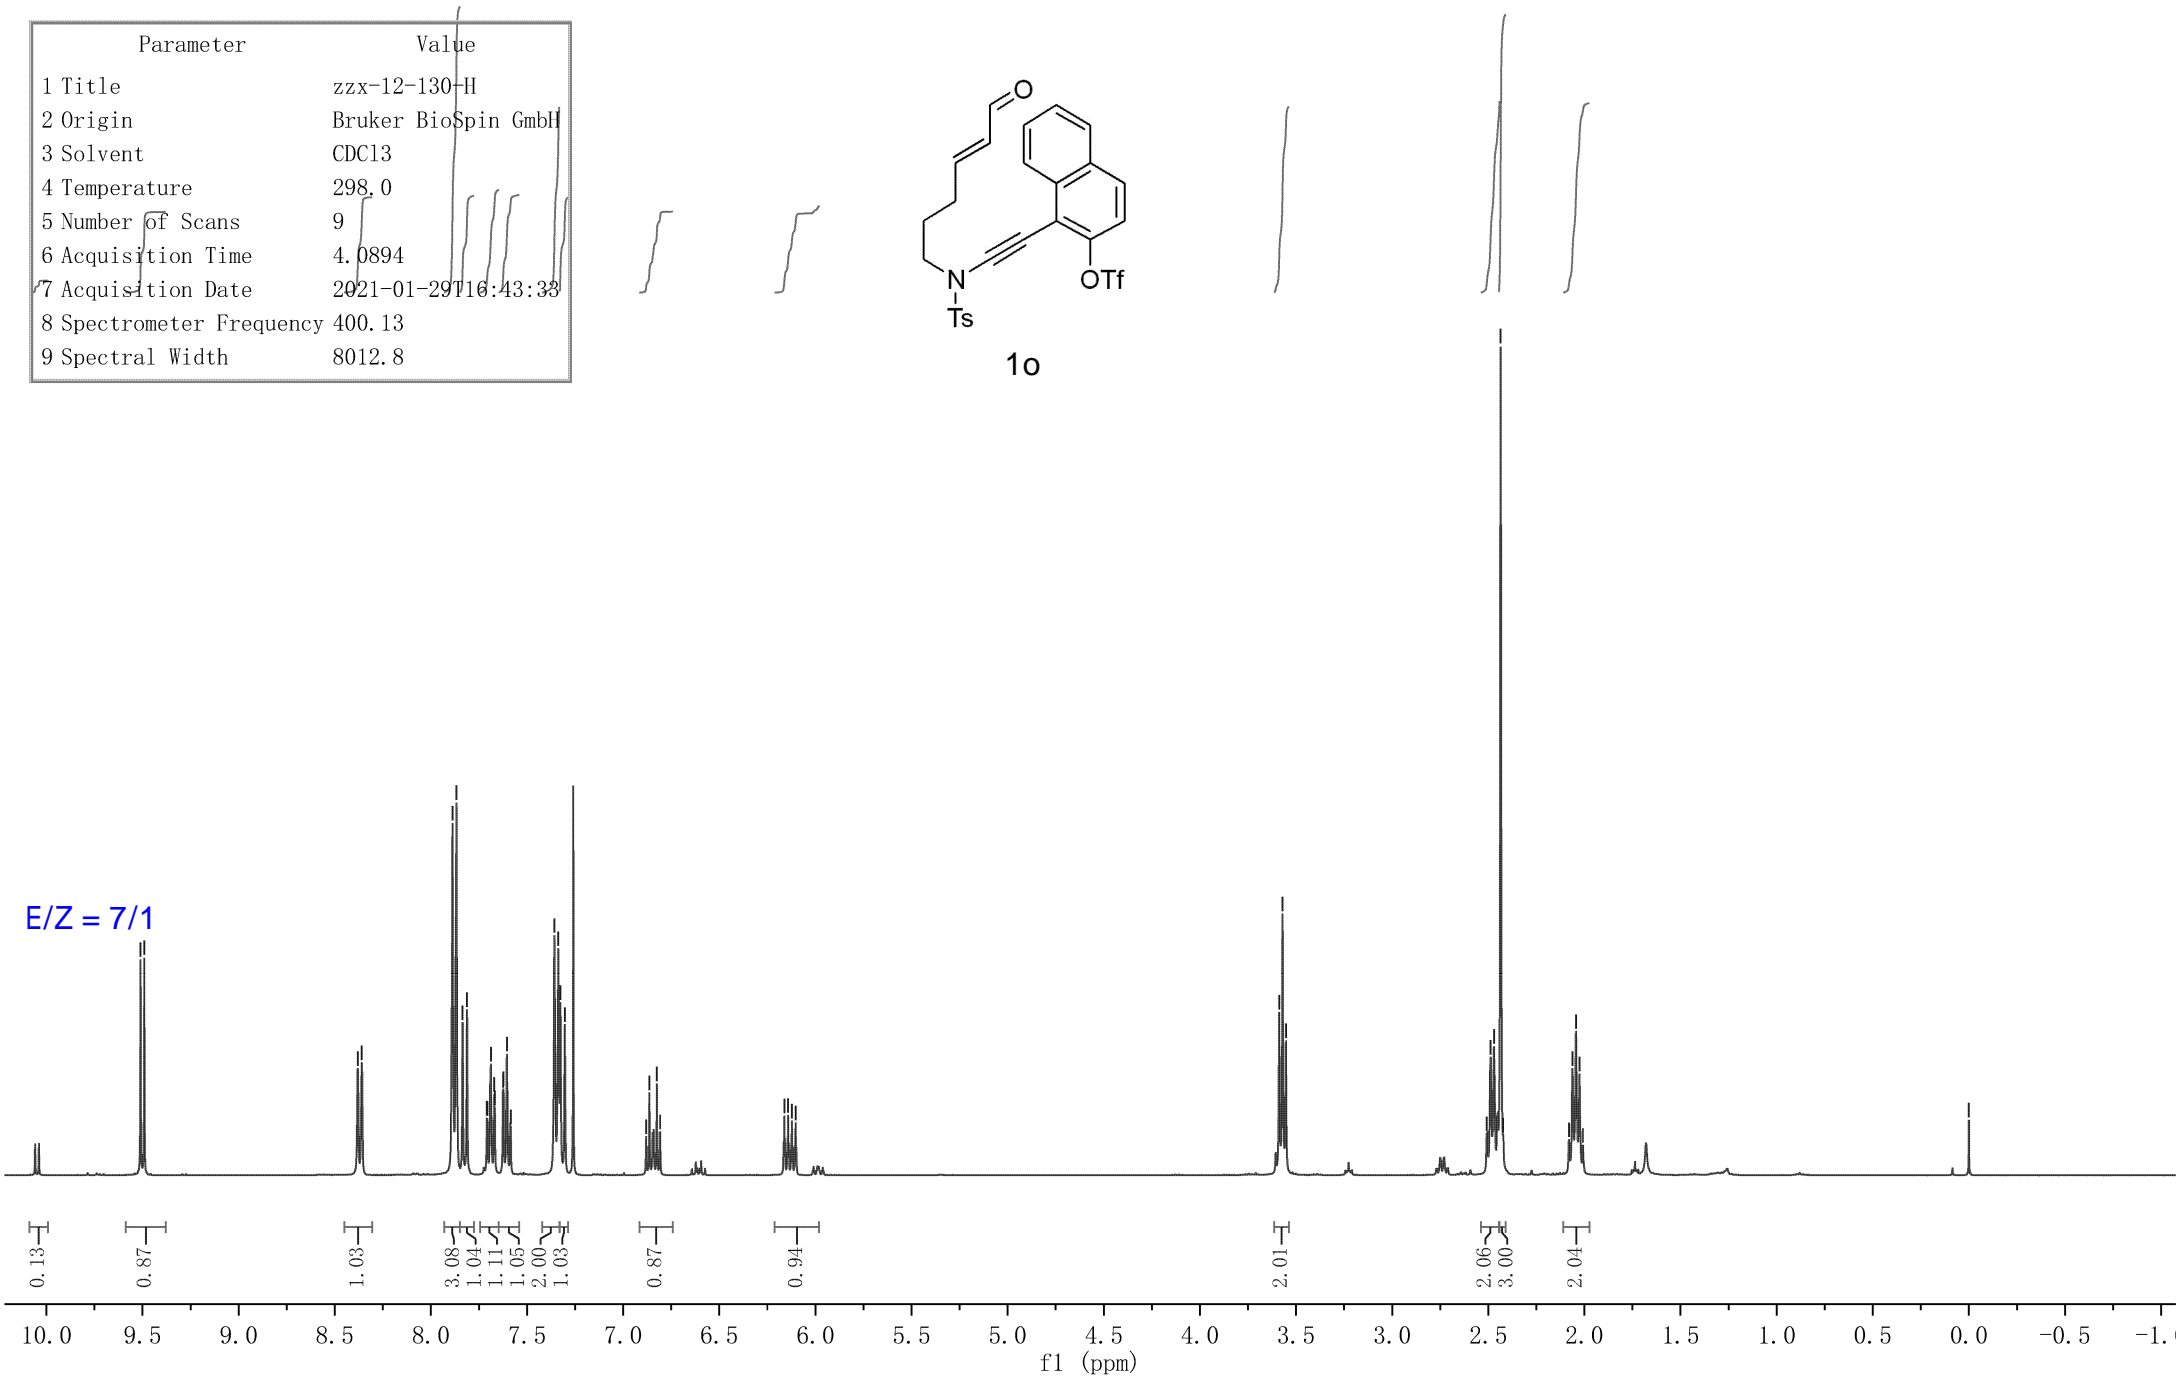

| Parameter                | Value               |
|--------------------------|---------------------|
| 1 Title                  | zzx-12-130-C        |
| 2 Origin                 | Bruker BioSpin GmbH |
| 3 Solvent                | CDC13               |
| 4 Temperature            | 300.0               |
| 5 Number of Scans        | 75                  |
| 6 Acquisition Time       | 1.3631              |
| 7 Acquisition Date       | 2021-01-29T16:45:14 |
| 8 Spectrometer Frequency | 100.62              |
| 9 Spectral Width         | 24038.5             |

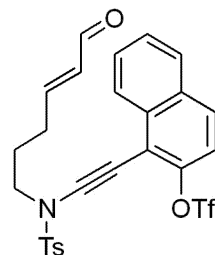

10

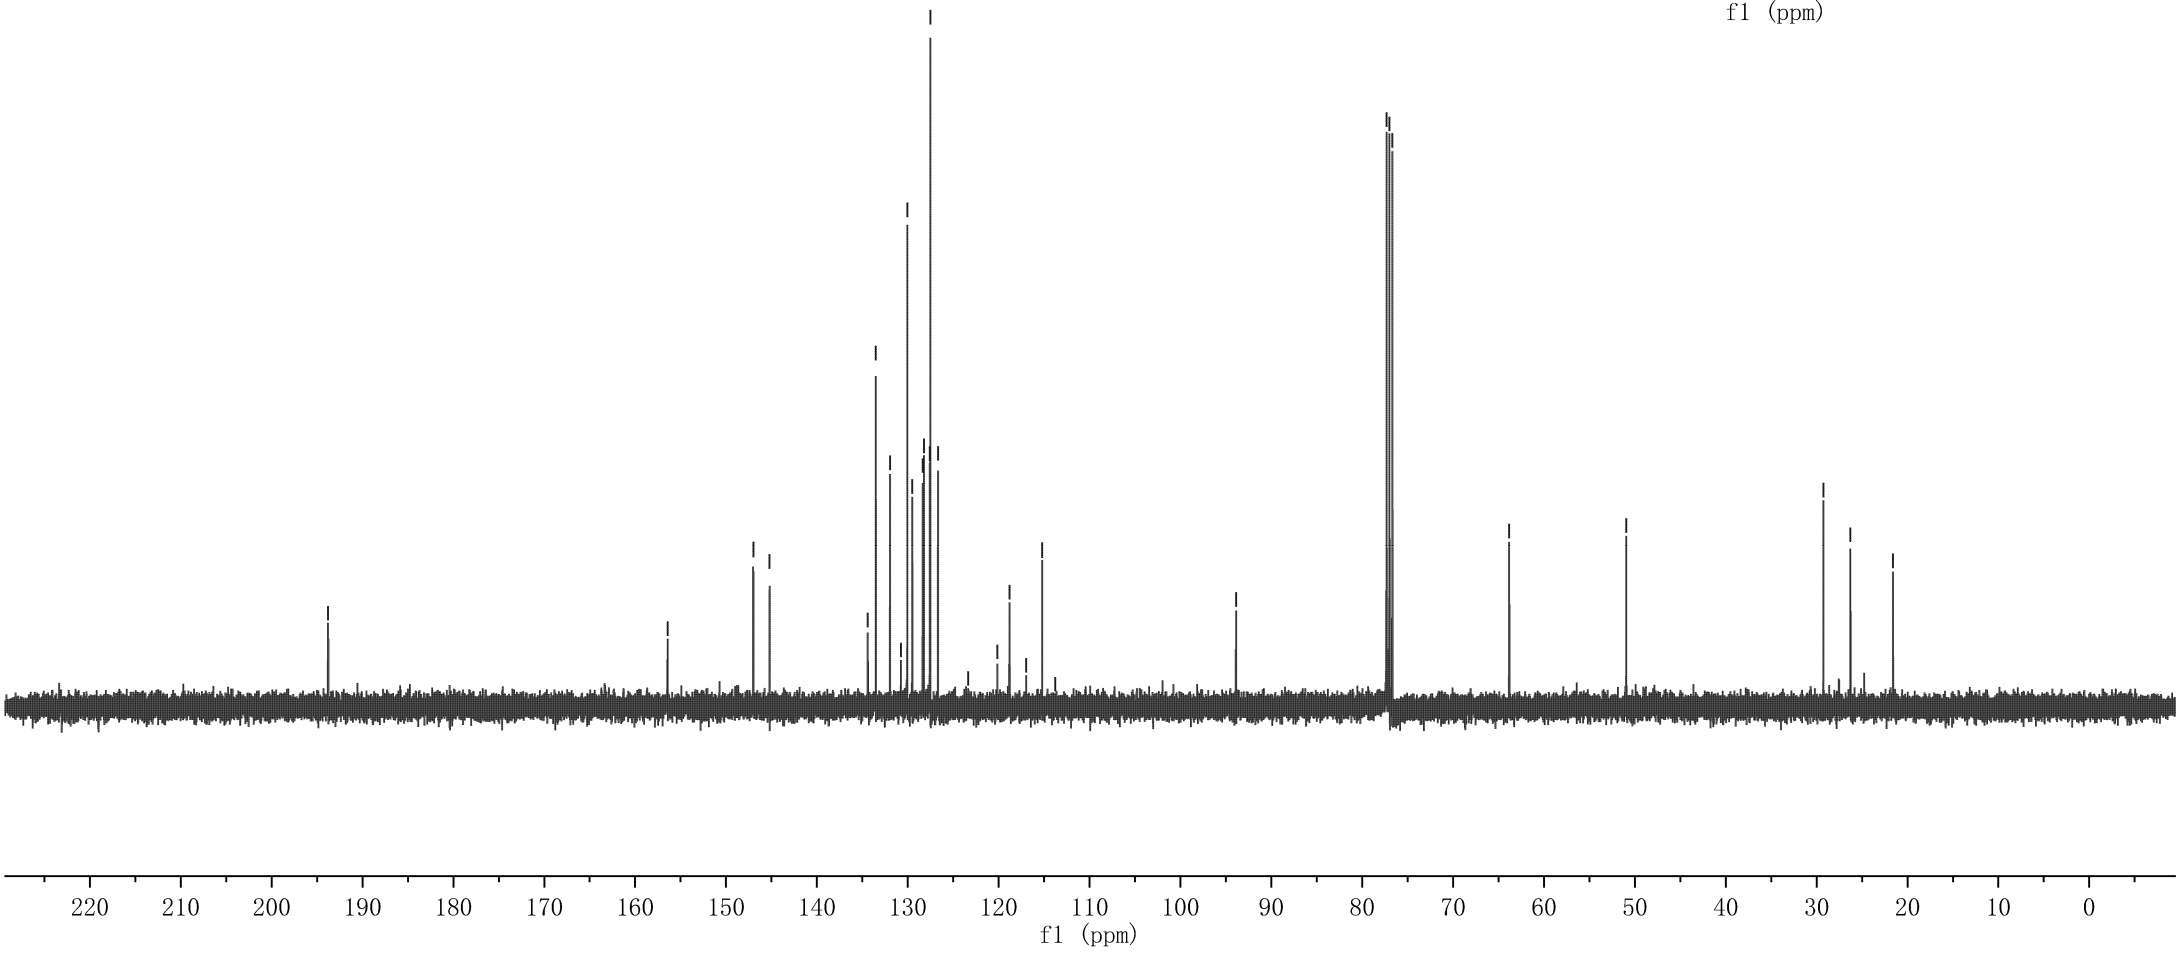

— 193.77

— 156.42

147.00  
145.21  
134.40  
133.52  
131.95  
130.76  
130.04  
129.50  
128.36  
128.22  
127.58  
127.52  
126.68  
123.34  
120.16  
118.81  
116.97  
115.22  
113.78

— 93.89

77.32  
77.00  
76.68  
130.76  
130.04  
129.50  
128.36  
128.22  
127.58  
127.52  
126.68  
50.95

123.34  
29.24  
26.28  
21.59  
118.81  
116.97  
115.22  
113.78

f1 (ppm)

f1 (ppm)

| Parameter                | Value               |
|--------------------------|---------------------|
| 1 Title                  | ZZX-18-S-OTf        |
| 2 Origin                 |                     |
| 3 Solvent                | CDC13               |
| 4 Temperature            | 297.5               |
| 5 Number of Scans        | 16                  |
| 6 Acquisition Time       | 1.0000              |
| 7 Acquisition Date       | 2023-02-09T11:31:45 |
| 8 Spectrometer Frequency | 376.28              |
| 9 Spectral Width         | 96153.0             |

—73.70

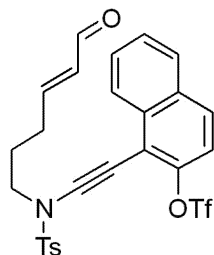

10

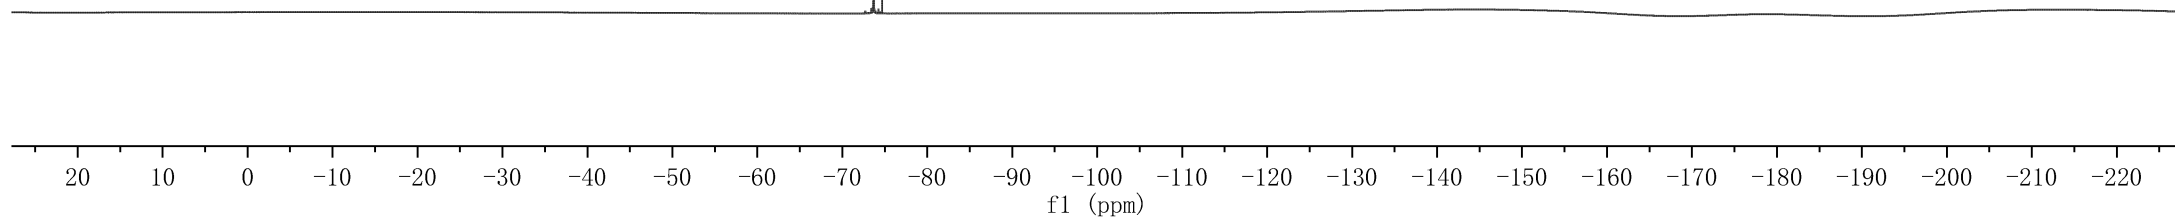

9.479  
9.459

8.446  
8.426  
7.946  
7.925  
7.802  
7.781  
7.587  
7.533  
7.351  
7.331  
7.153  
7.149  
7.145  
7.135  
7.130  
7.008  
6.999  
6.967

6.165  
6.142  
6.122  
6.099

3.652  
3.635  
3.617

2.528  
2.507  
2.490  
2.473  
2.236  
2.186  
2.174  
2.155  
2.137

— 0.000

| Parameter                | Value               |
|--------------------------|---------------------|
| 1 Title                  | ZZX-11-210-H        |
| 2 Origin                 | Bruker BioSpin GmbH |
| 3 Solvent                | CDC13               |
| 4 Temperature            | 298.4               |
| 5 Number of Scans        | 8                   |
| 6 Acquisition Time       | 3.9846              |
| 7 Acquisition Date       | 2020-12-16T11:02:48 |
| 8 Spectrometer Frequency | 400.03              |
| 9 Spectral Width         | 8223.7              |

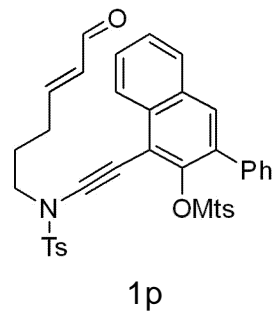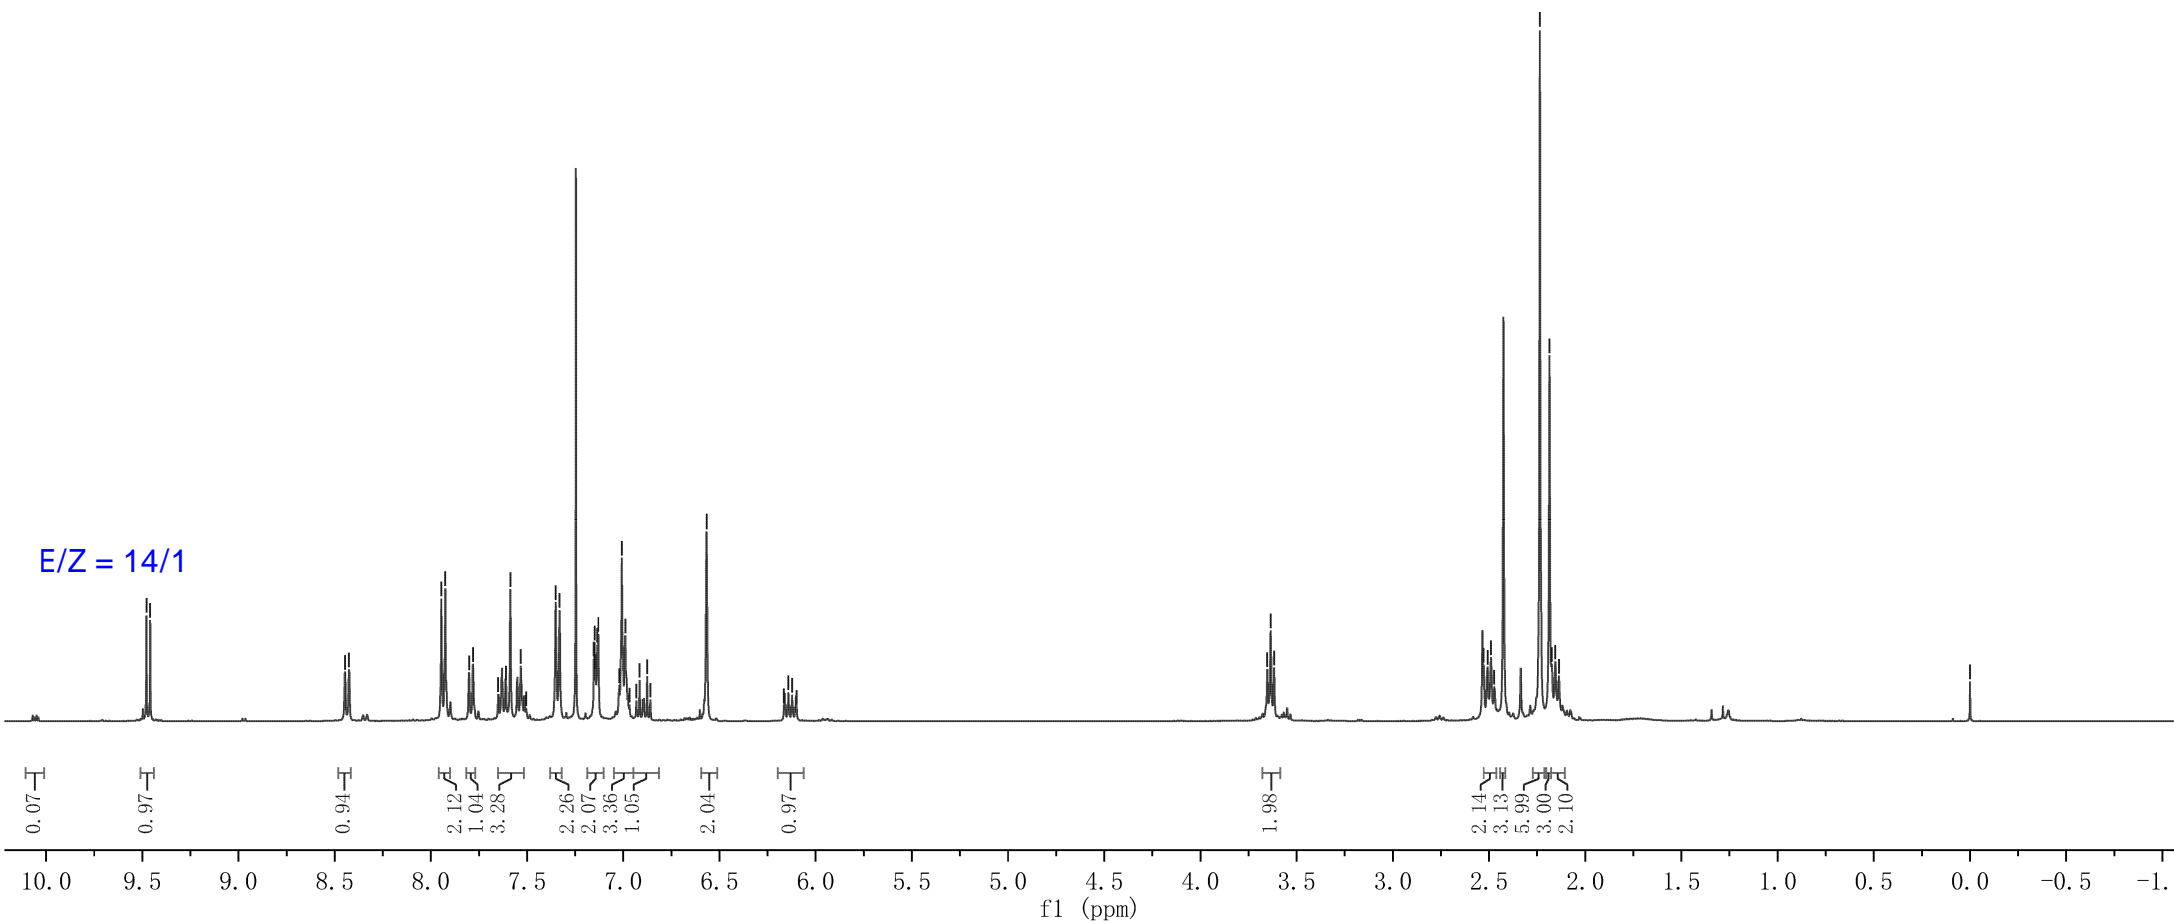

| Parameter                | Value               |
|--------------------------|---------------------|
| 1 Title                  | ZZX-11-210-C        |
| 2 Origin                 | Bruker BioSpin GmbH |
| 3 Solvent                | CDC13               |
| 4 Temperature            | 299.0               |
| 5 Number of Scans        | 61                  |
| 6 Acquisition Time       | 1.3631              |
| 7 Acquisition Date       | 2020-12-16T11:06:27 |
| 8 Spectrometer Frequency | 100.59              |
| 9 Spectral Width         | 24038.5             |

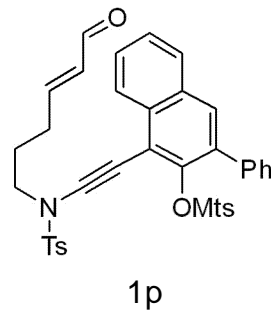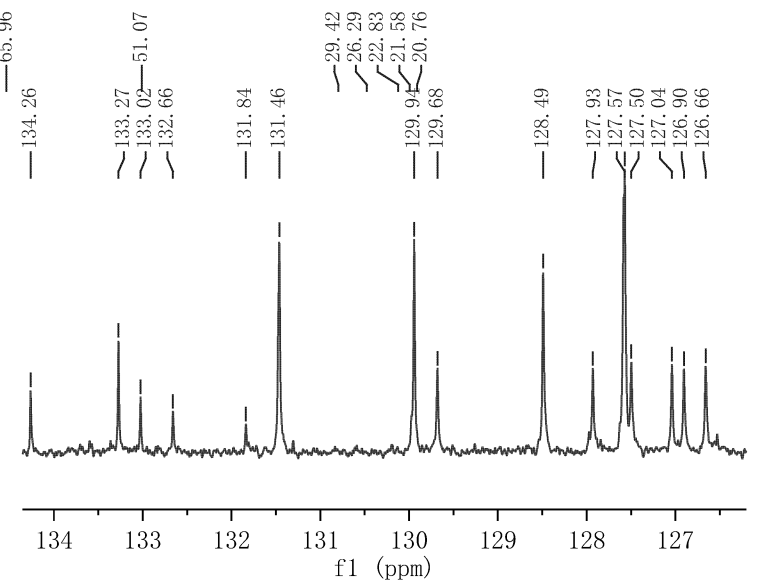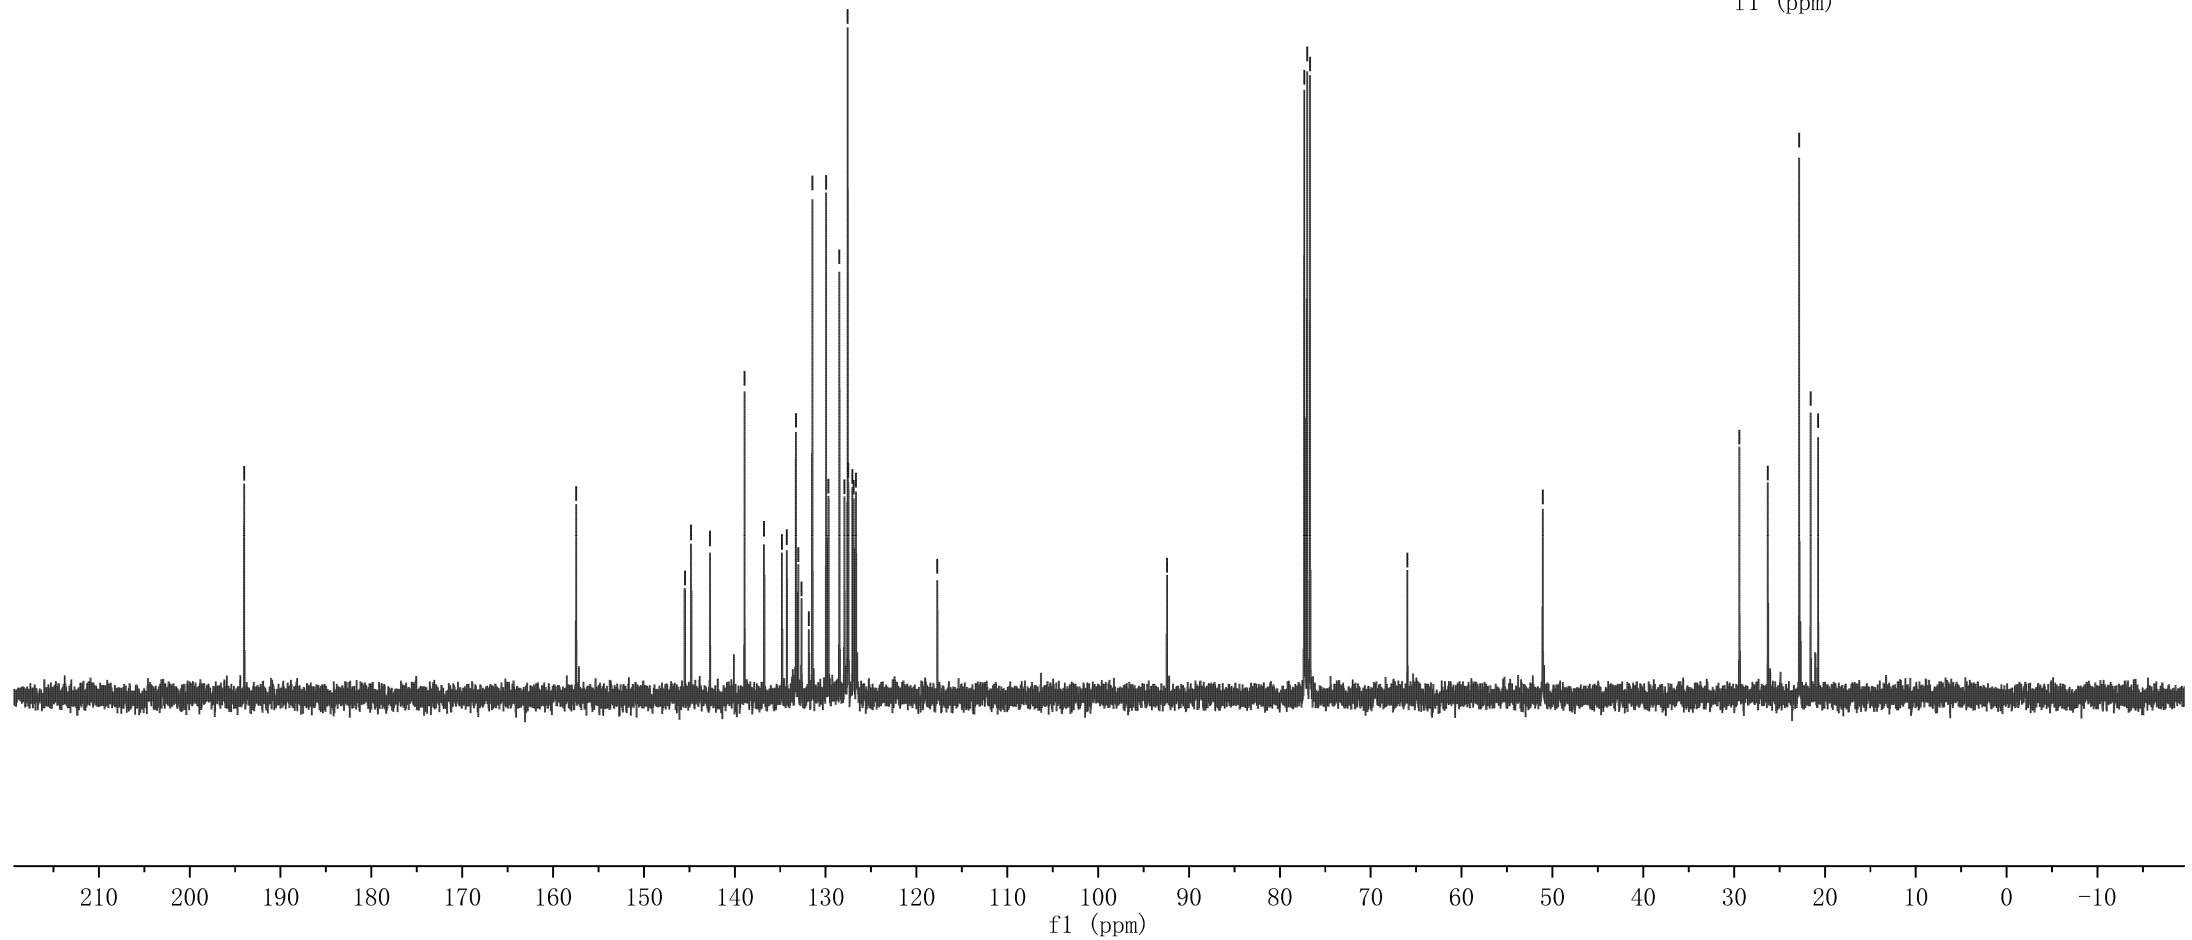



9.781  
 9.495  
 9.475

8.289  
 8.280  
 8.256  
 8.248

7.916  
 7.912  
 7.896  
 7.890  
 7.491  
 7.468  
 7.357  
 7.337  
 6.957  
 6.921  
 6.865

6.161  
 6.141  
 6.122  
 6.102

3.573  
 3.555  
 3.537  
 3.375

2.554  
 2.517  
 2.499  
 2.482  
 2.462  
 2.440  
 2.329  
 2.176  
 2.137  
 2.118  
 2.099

— 0.000

| Parameter                | Value               |
|--------------------------|---------------------|
| 1 Title                  | zzx-18-s-3-OMe      |
| 2 Origin                 | Bruker BioSpin GmbH |
| 3 Solvent                | CDC13               |
| 4 Temperature            | 298.0               |
| 5 Number of Scans        | 4                   |
| 6 Acquisition Time       | 4.0894              |
| 7 Acquisition Date       | 2023-02-24T00:18:00 |
| 8 Spectrometer Frequency | 400.13              |
| 9 Spectral Width         | 8012.8              |

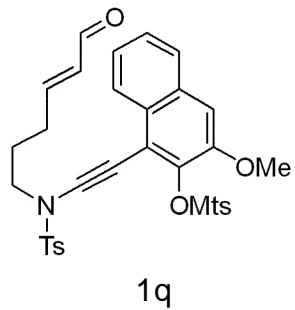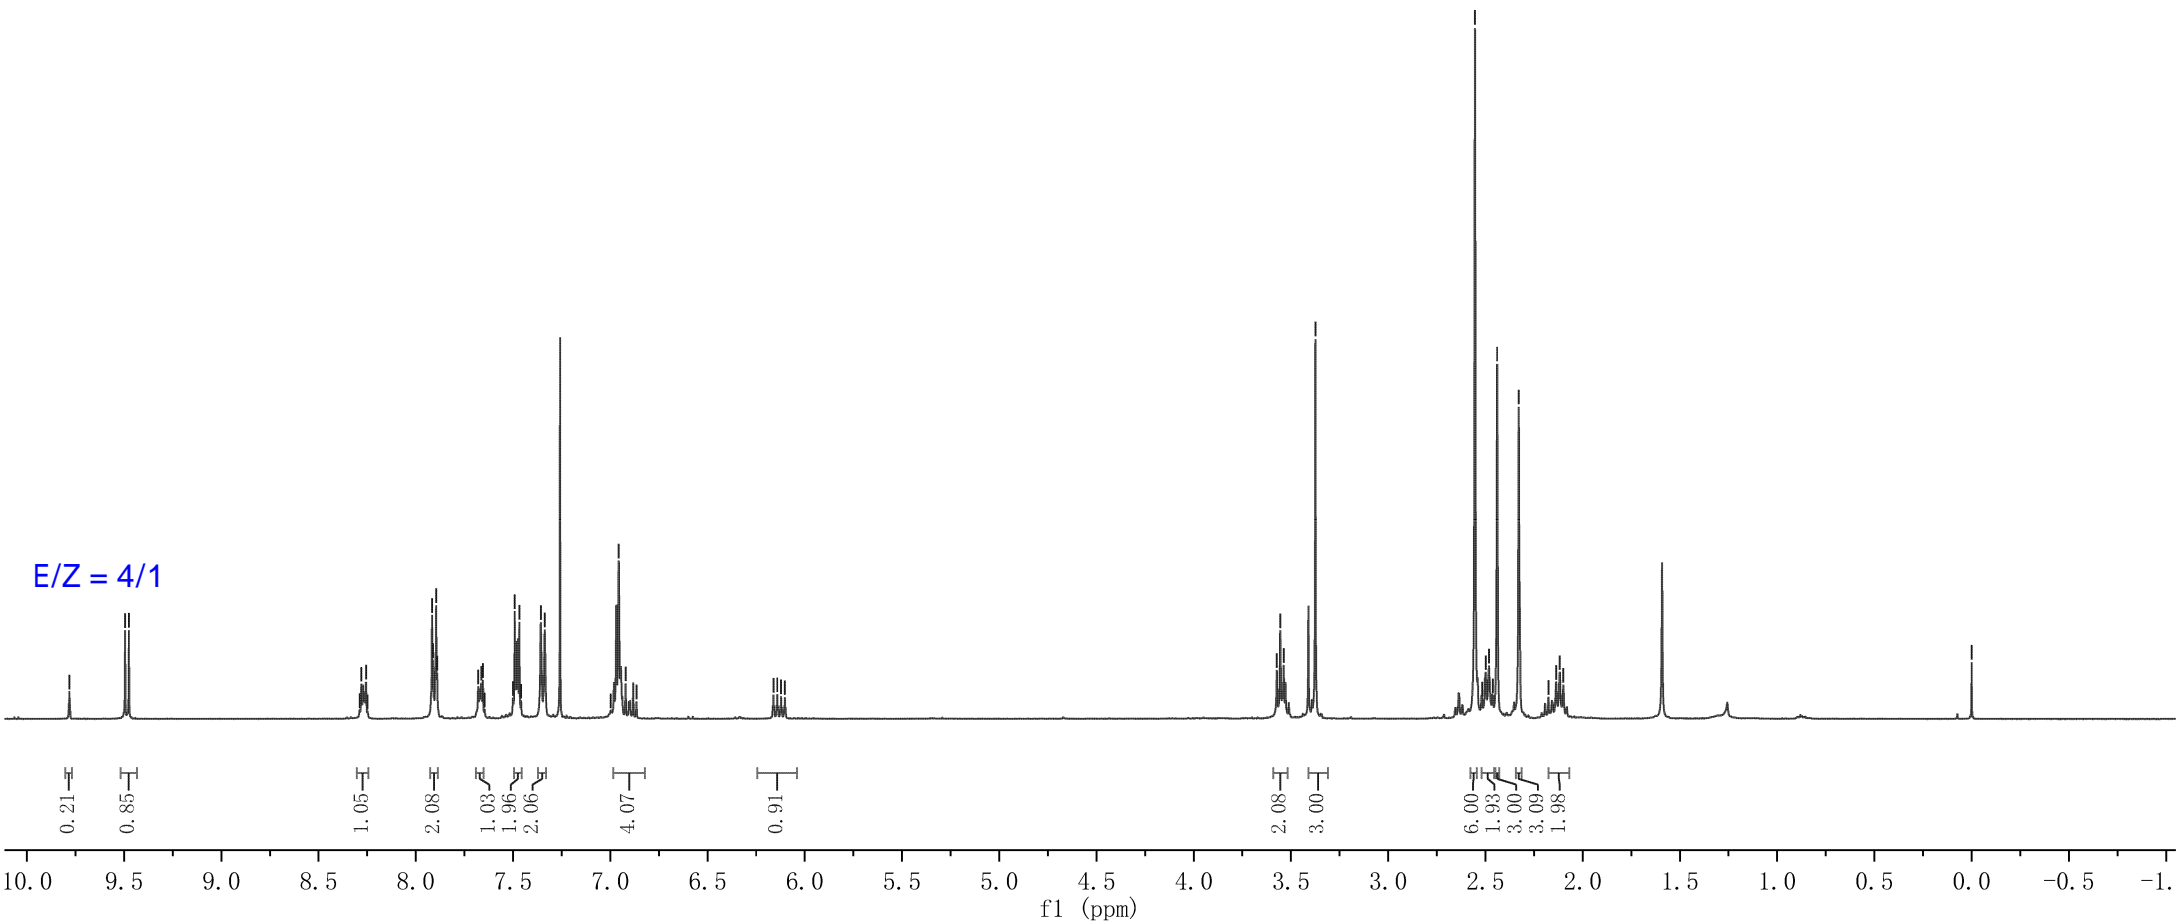

| Parameter                | Value               |
|--------------------------|---------------------|
| 1 Title                  | ZZX-11.38           |
| 2 Origin                 |                     |
| 3 Solvent                | CDC13               |
| 4 Temperature            | 297.8               |
| 5 Number of Scans        | 200                 |
| 6 Acquisition Time       | 1.0000              |
| 7 Acquisition Date       | 2022-03-18T09:45:49 |
| 8 Spectrometer Frequency | 100.56              |
| 9 Spectral Width         | 26041.0             |

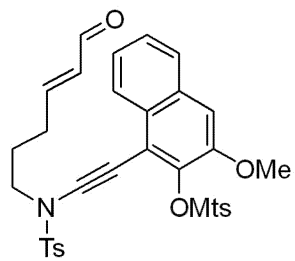

1q

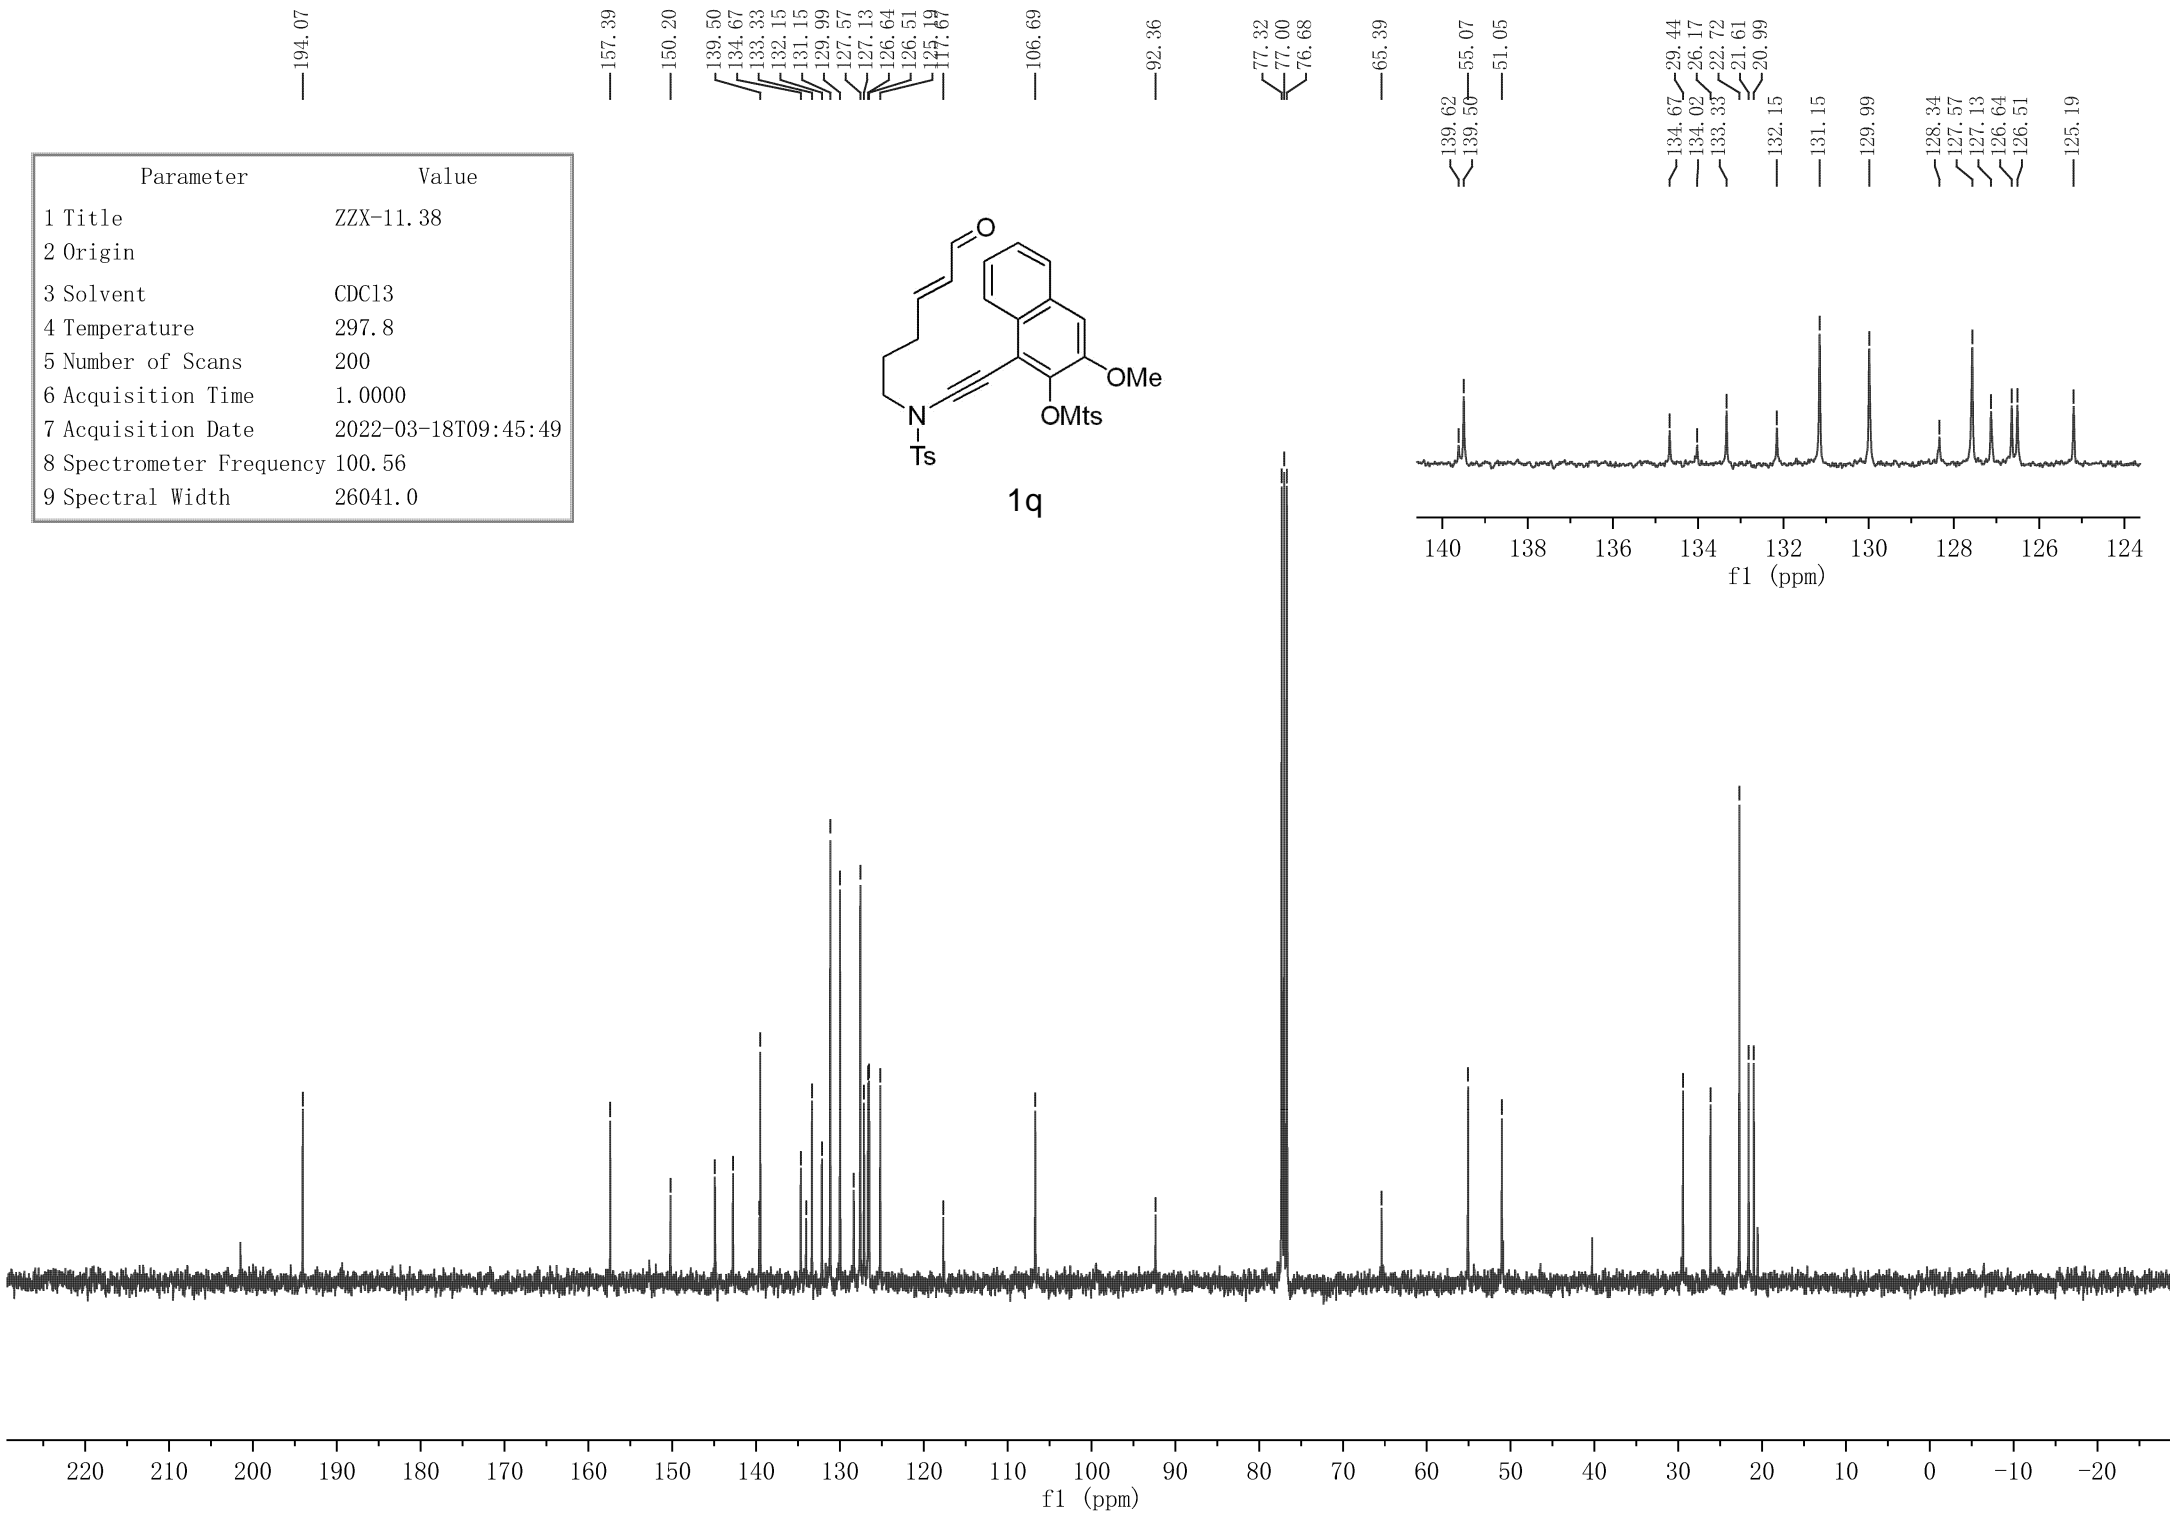

9.501  
9.481

8.223  
8.200  
7.922  
7.918  
7.898  
7.878  
7.452  
7.429  
7.365  
7.345

6.993  
6.911  
6.877  
6.599  
6.158  
6.135  
6.115  
6.092

3.569  
3.551  
3.534

2.530  
2.504  
2.501  
2.484  
2.467  
2.438  
2.342  
2.127  
2.110  
2.091  
2.073  
2.055

0.000

| Parameter                | Value               |
|--------------------------|---------------------|
| 1 Title                  | zzx-11-84-H-1       |
| 2 Origin                 | Bruker BioSpin GmbH |
| 3 Solvent                | CDC13               |
| 4 Temperature            | 298.0               |
| 5 Number of Scans        | 9                   |
| 6 Acquisition Time       | 4.0894              |
| 7 Acquisition Date       | 2020-11-06T14:26:25 |
| 8 Spectrometer Frequency | 400.13              |
| 9 Spectral Width         | 8012.8              |

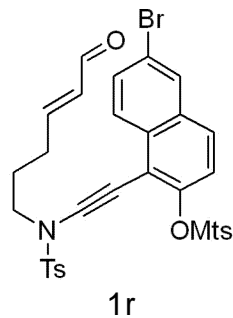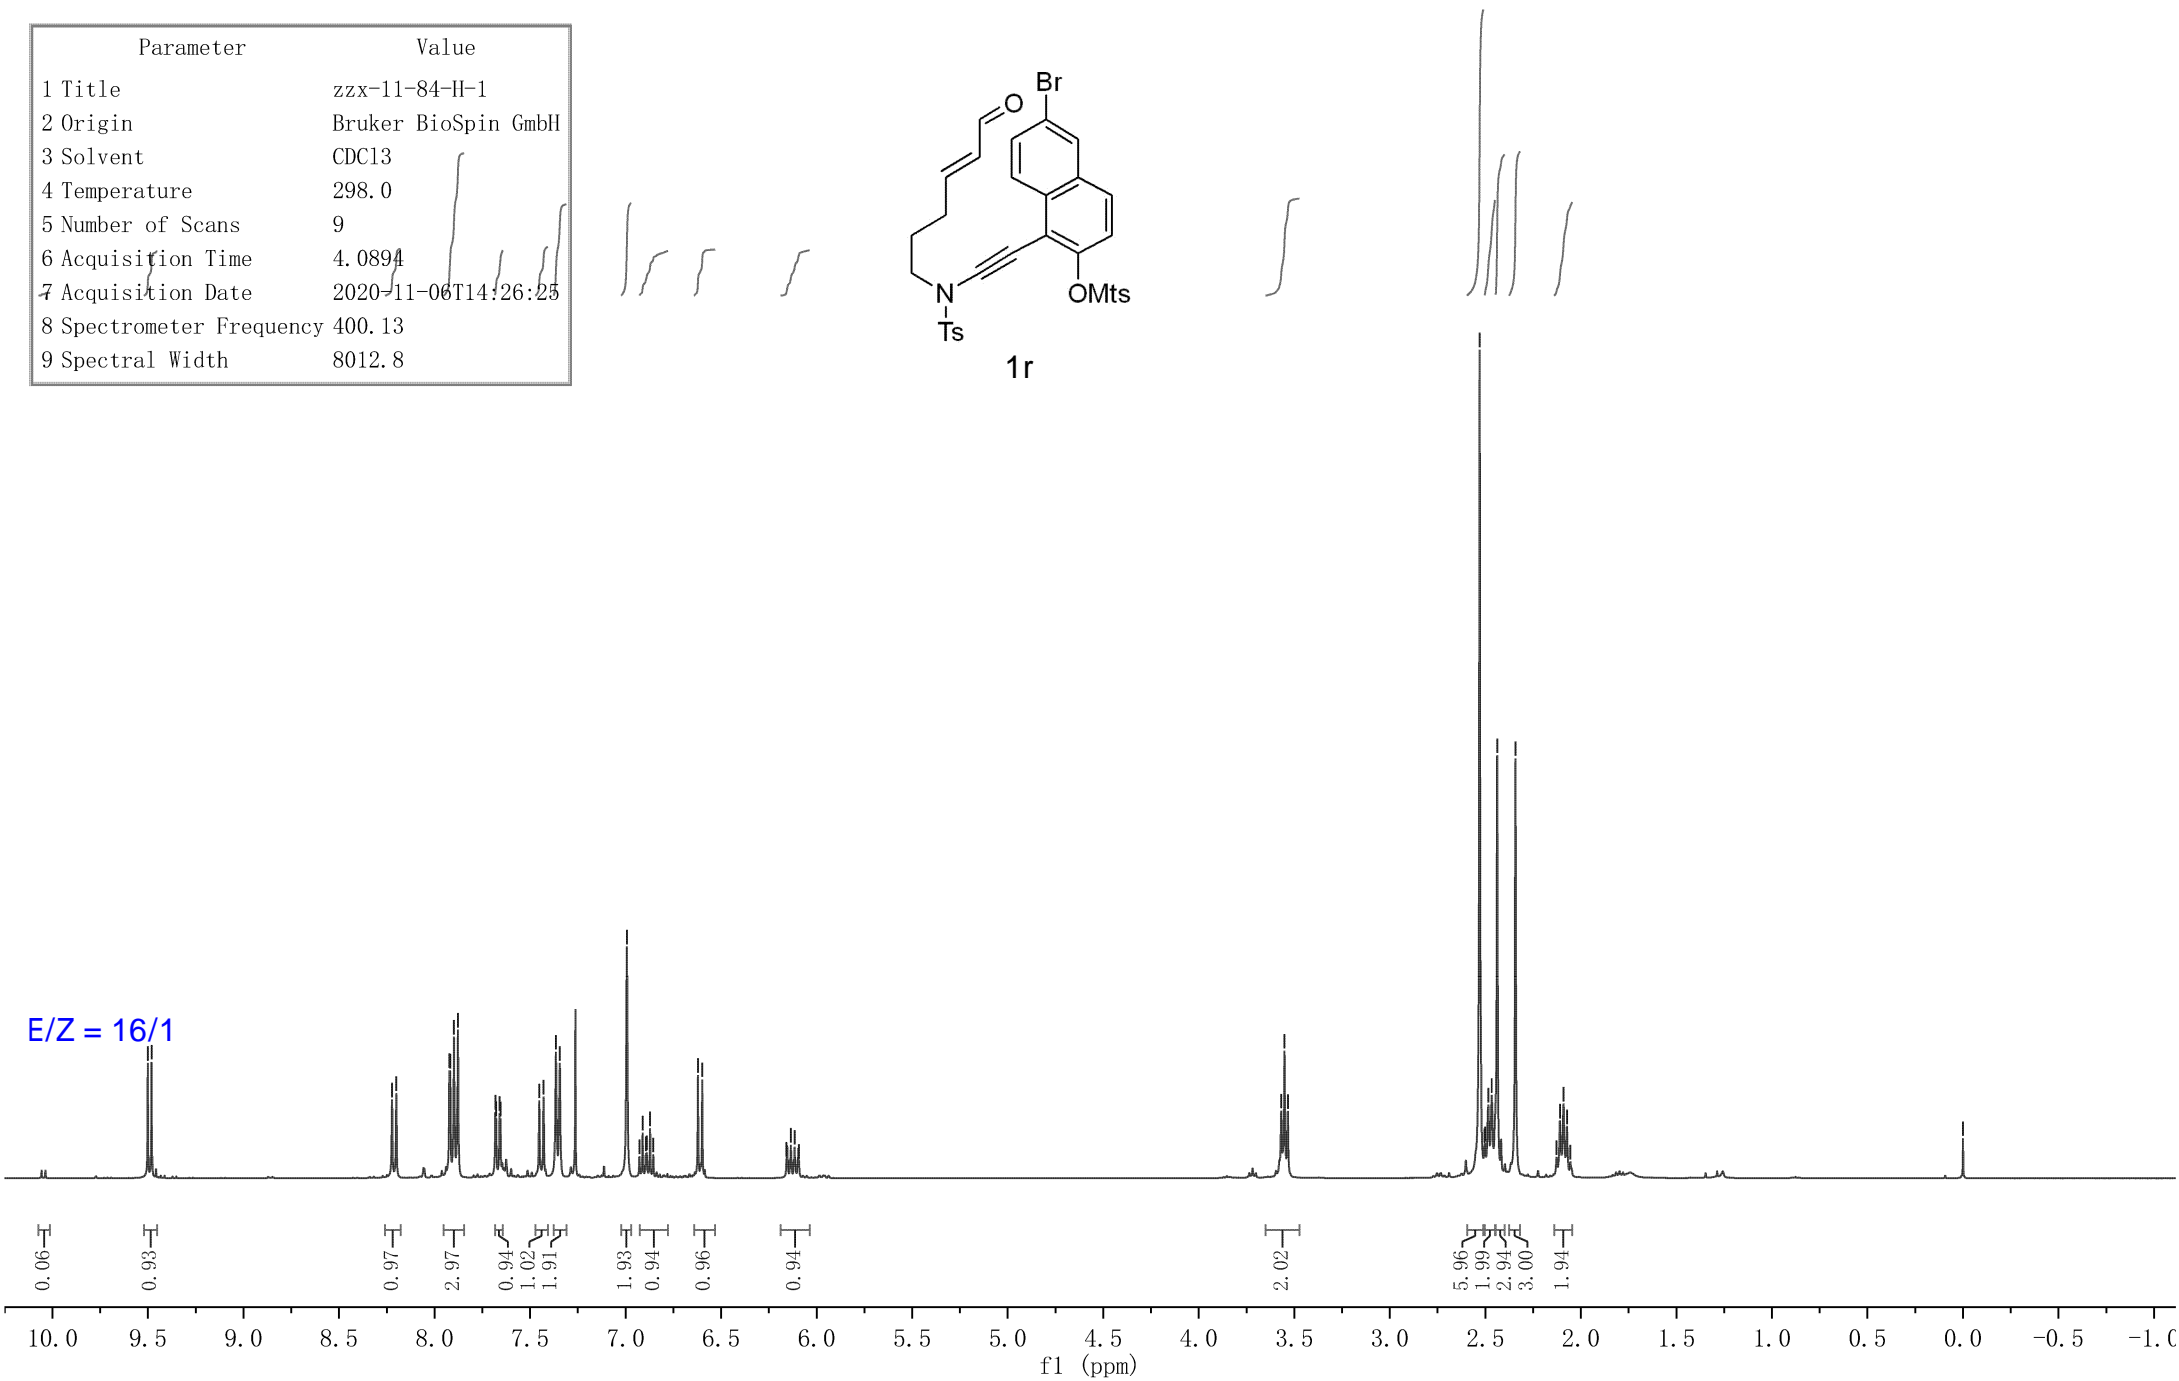

| Parameter                | Value               |
|--------------------------|---------------------|
| 1 Title                  | zzx-11-84-C         |
| 2 Origin                 | Bruker BioSpin GmbH |
| 3 Solvent                | CDC13               |
| 4 Temperature            | 300.0               |
| 5 Number of Scans        | 19                  |
| 6 Acquisition Time       | 1.3631              |
| 7 Acquisition Date       | 2020-11-06T14:28:44 |
| 8 Spectrometer Frequency | 100.61              |
| 9 Spectral Width         | 24038.5             |

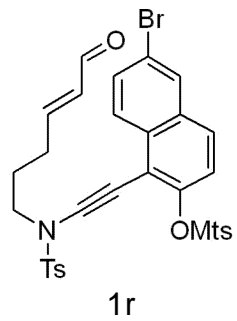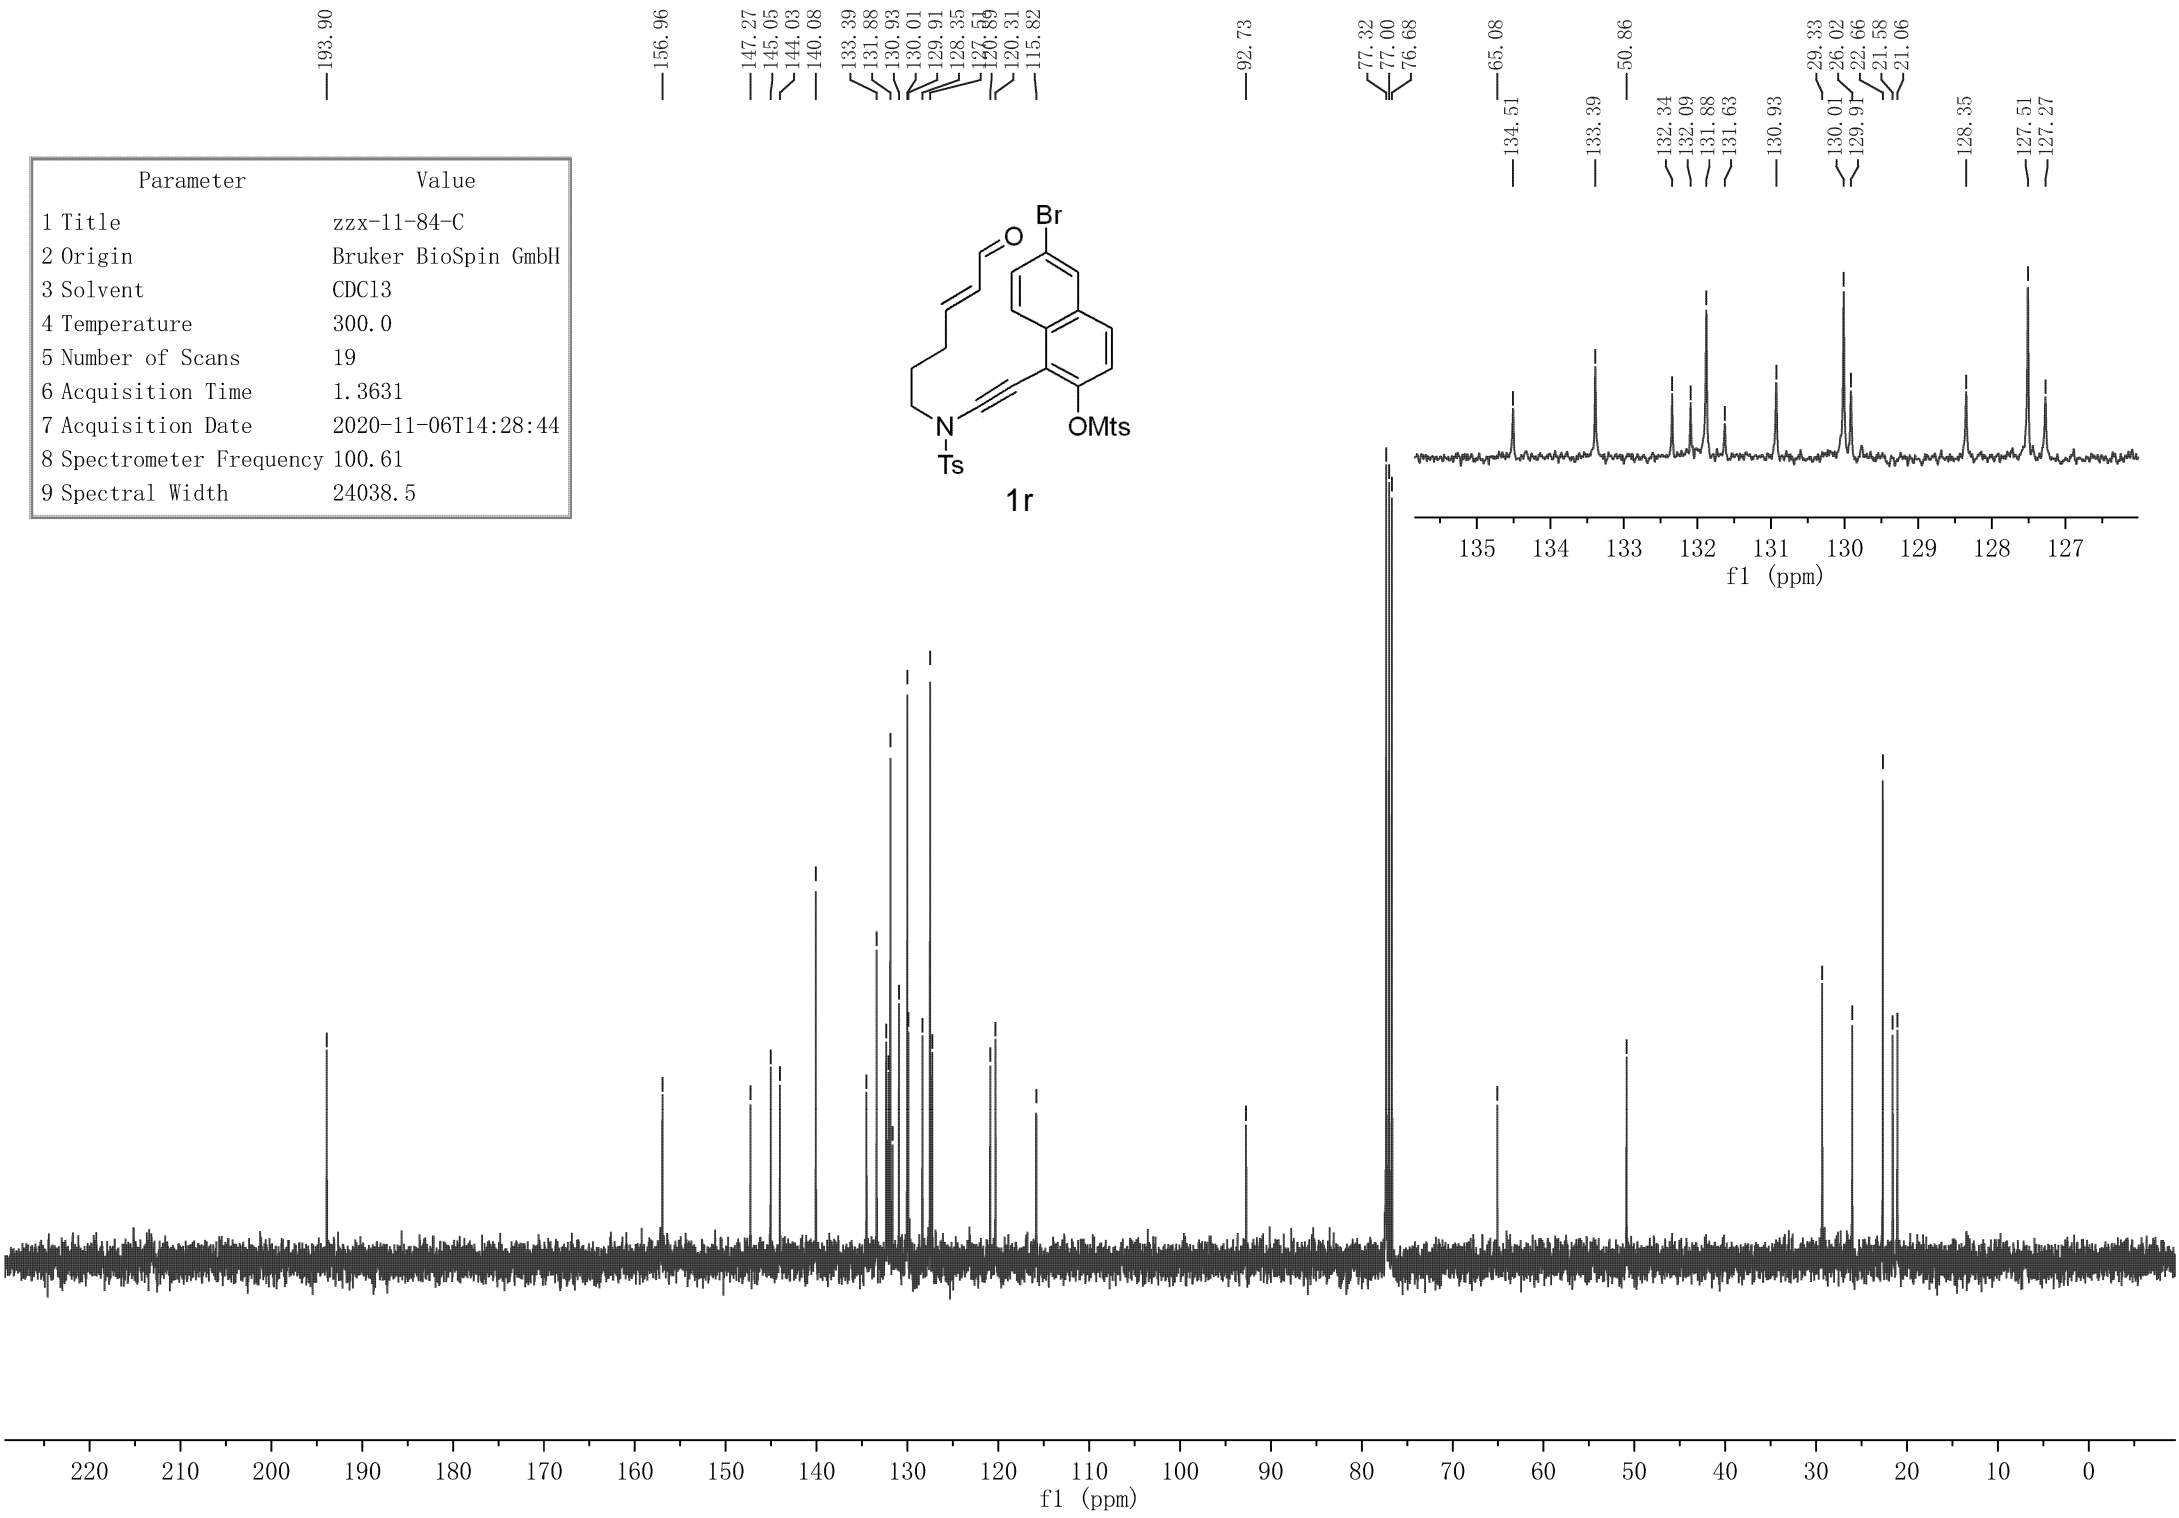

9.507  
9.487

8.431  
8.409  
7.959  
7.935  
7.916  
7.904  
7.708  
7.690  
7.484  
7.466  
7.366  
7.347  
6.998  
6.929  
6.910  
6.889  
6.872  
6.600  
6.169  
6.150  
6.130  
6.111

3.580  
3.564  
3.547

2.548  
2.524  
2.505  
2.487  
2.469  
2.435  
2.347  
2.149  
2.132  
2.114  
2.096  
2.077

0.000

| Parameter                | Value               |
|--------------------------|---------------------|
| 1 Title                  | zzx-11-162-H        |
| 2 Origin                 | Bruker BioSpin GmbH |
| 3 Solvent                | CDC13               |
| 4 Temperature            | 298.0               |
| 5 Number of Scans        | 8                   |
| 6 Acquisition Time       | 470894              |
| 7 Acquisition Date       | 2020-11-29T14:58:29 |
| 8 Spectrometer Frequency | 400.13              |
| 9 Spectral Width         | 8012.8              |

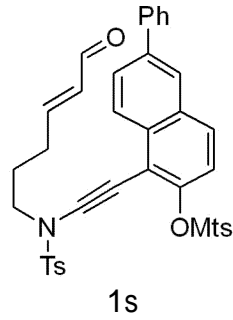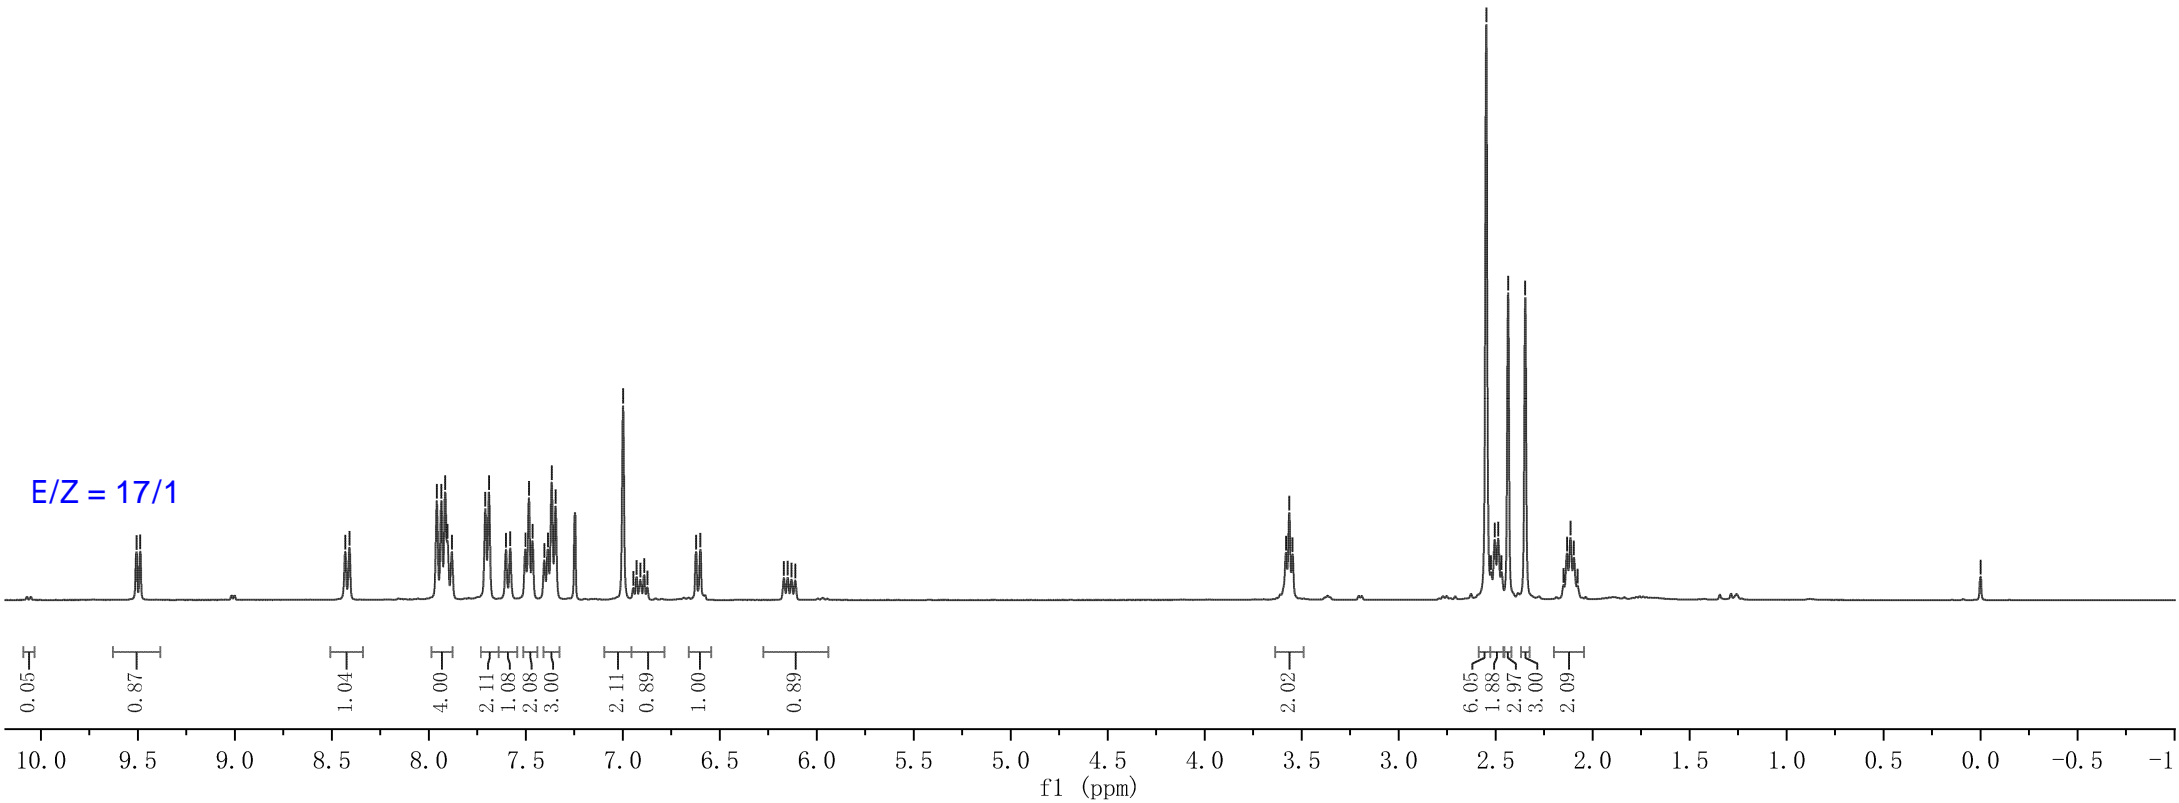

| Parameter                | Value               |
|--------------------------|---------------------|
| 1 Title                  | zzx-11-162-C        |
| 2 Origin                 | Bruker BioSpin GmbH |
| 3 Solvent                | CDC13               |
| 4 Temperature            | 300.0               |
| 5 Number of Scans        | 52                  |
| 6 Acquisition Time       | 1.3631              |
| 7 Acquisition Date       | 2020-11-29T15:00:13 |
| 8 Spectrometer Frequency | 100.61              |
| 9 Spectral Width         | 24038.5             |

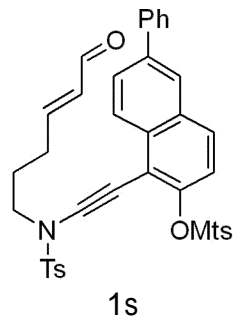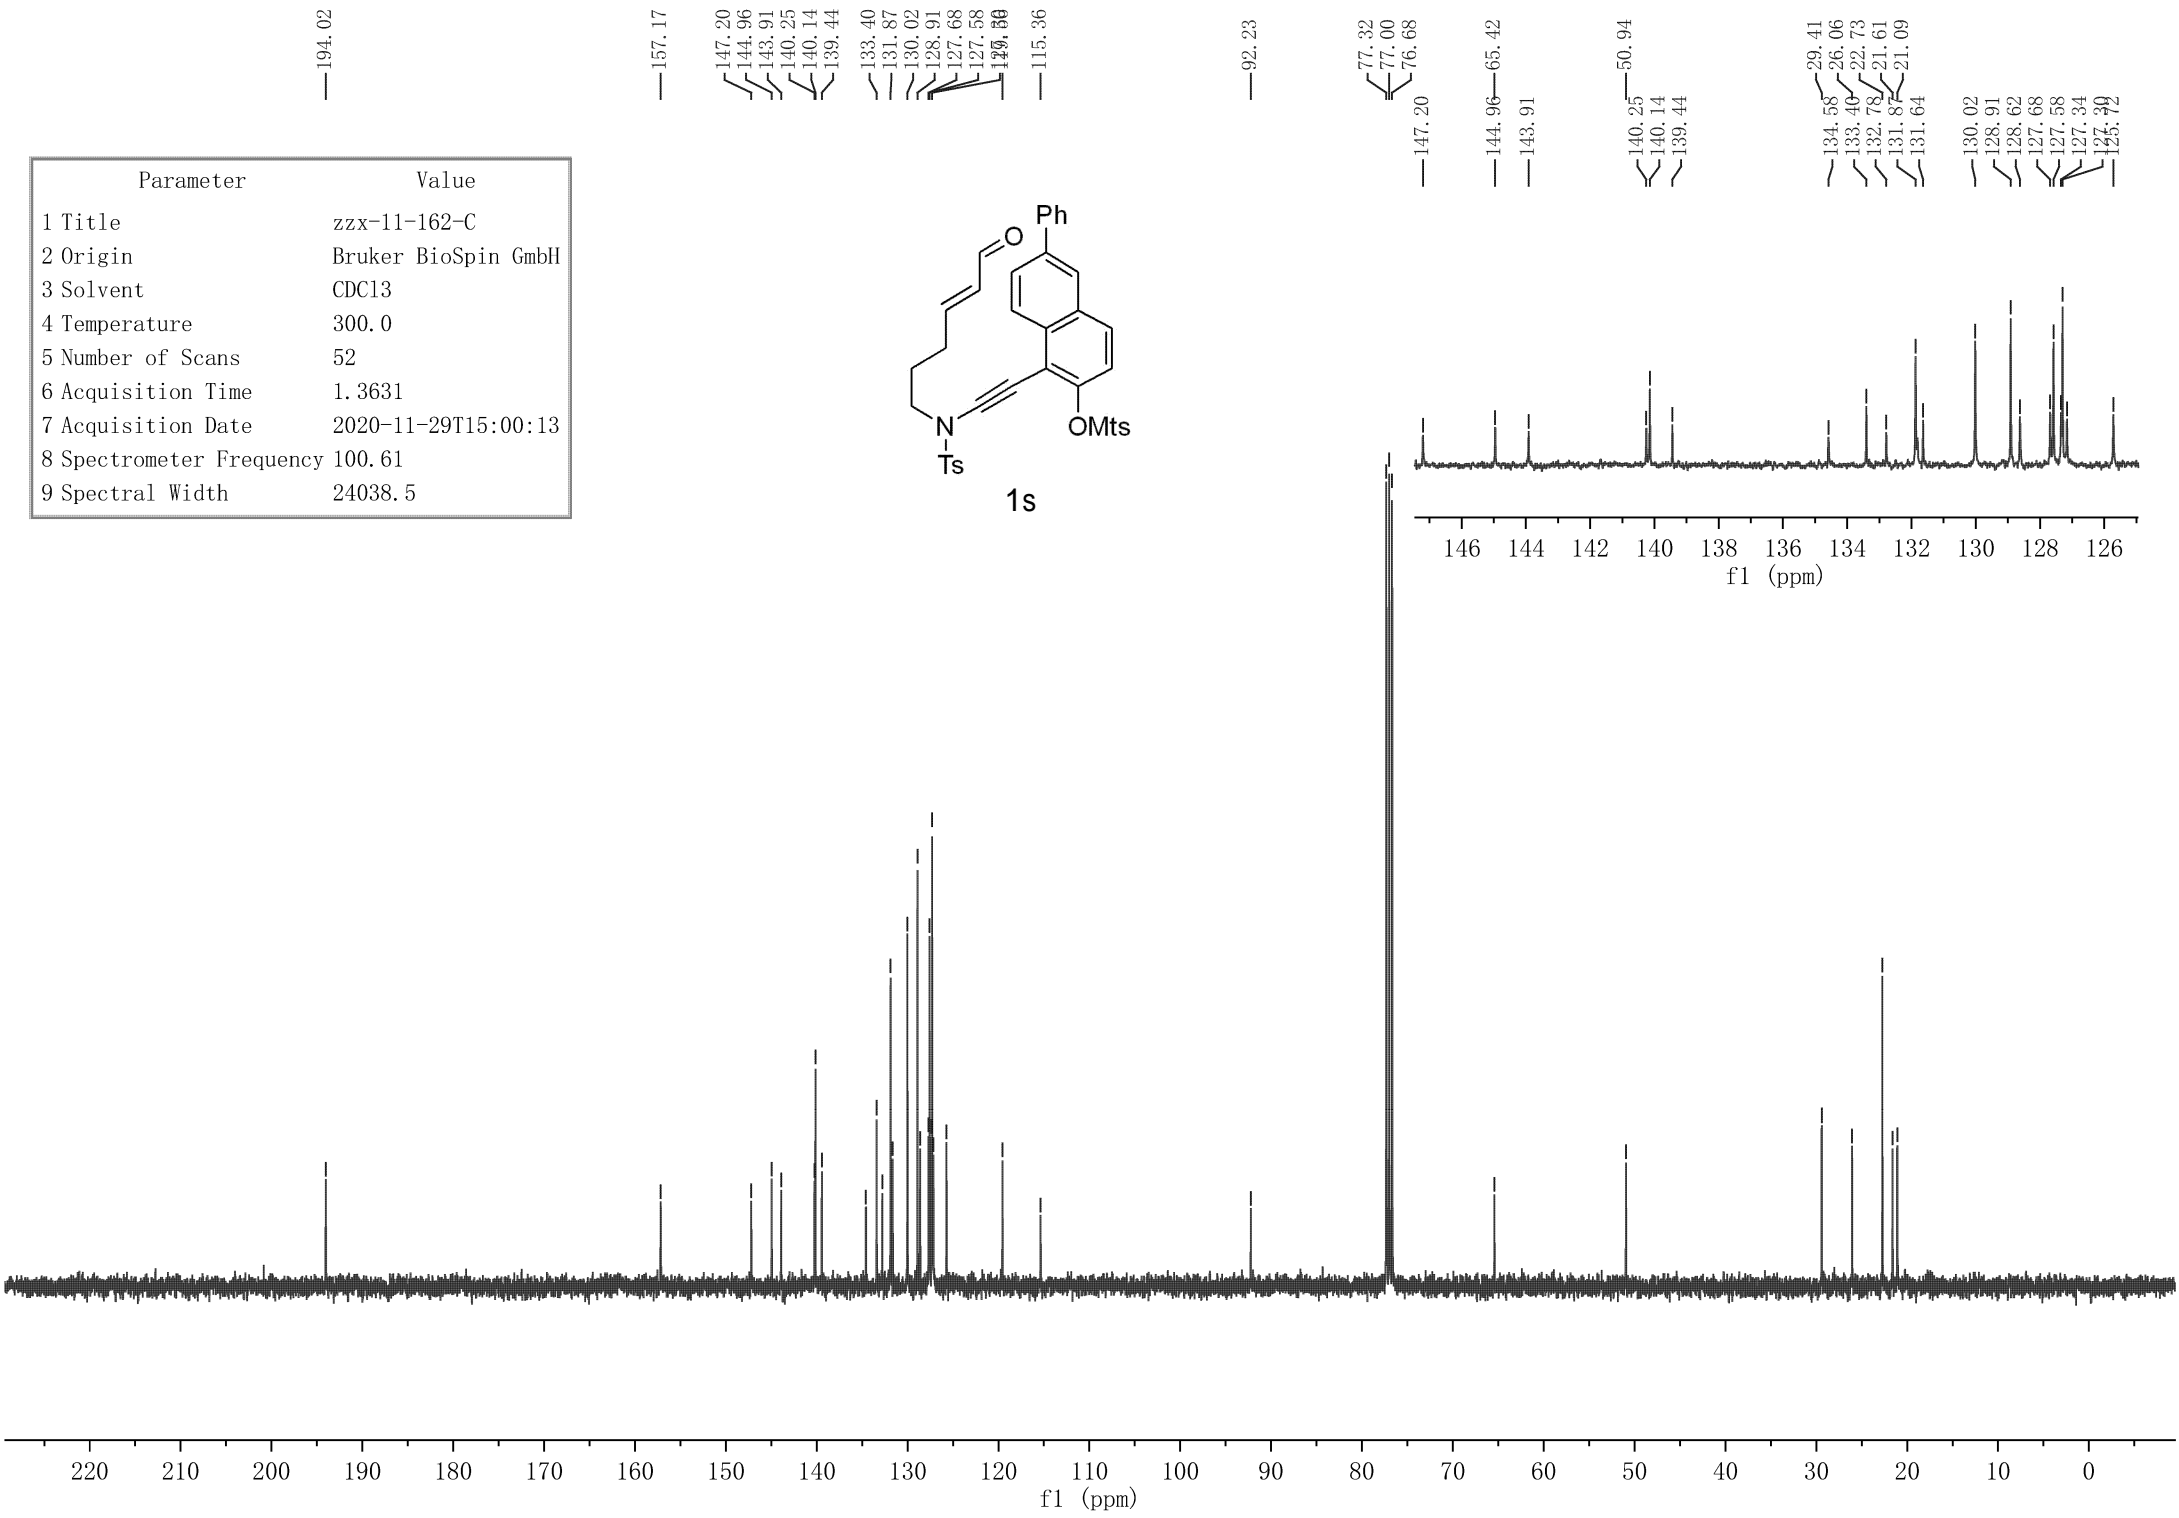

9.502  
9.482  
8.242  
8.221  
7.919  
7.902  
7.898  
7.457  
7.435  
7.359  
7.339  
6.988  
6.925  
6.903  
6.886  
6.869  
6.525  
6.165  
6.141  
6.122  
6.099

3.569  
3.551  
3.534  
2.539  
2.530  
2.514  
2.505  
2.480  
2.463  
2.460  
2.439  
2.345  
2.138  
2.121  
2.101  
2.083  
2.066

0.000

| Parameter                | Value               |
|--------------------------|---------------------|
| 1 Title                  | ZZX-11-196-H        |
| 2 Origin                 | Bruker BioSpin GmbH |
| 3 Solvent                | CDC13               |
| 4 Temperature            | 298.5               |
| 5 Number of Scans        | 12                  |
| 6 Acquisition Time       | 3.9846              |
| 7 Acquisition Date       | 2020-12-16T11:23:10 |
| 8 Spectrometer Frequency | 400.03              |
| 9 Spectral Width         | 8223.7              |

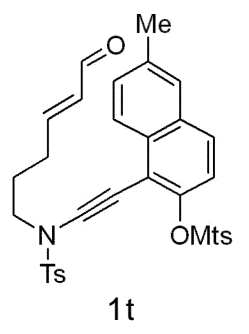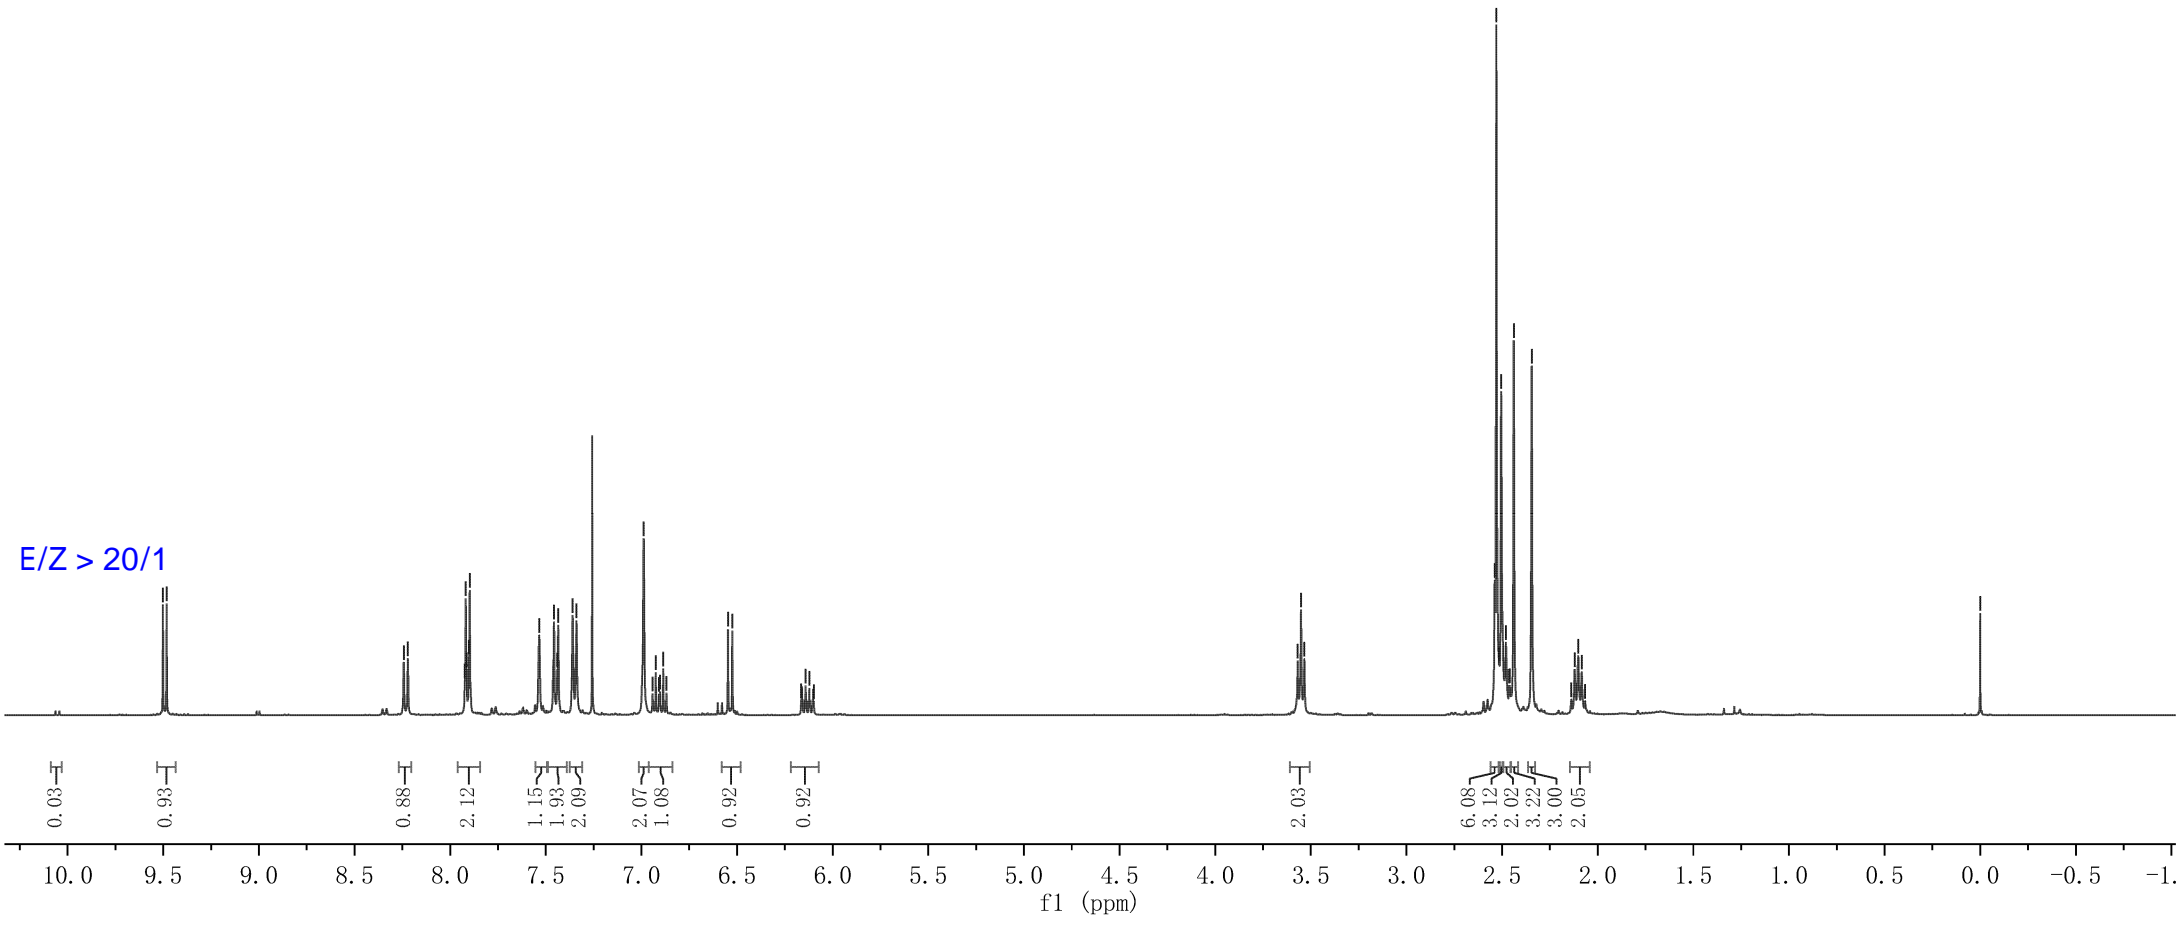

| Parameter                | Value               |
|--------------------------|---------------------|
| 1 Title                  | ZZX-11-196-C        |
| 2 Origin                 | Bruker BioSpin GmbH |
| 3 Solvent                | CDC13               |
| 4 Temperature            | 299.0               |
| 5 Number of Scans        | 104                 |
| 6 Acquisition Time       | 1.3631              |
| 7 Acquisition Date       | 2020-12-16T11:25:03 |
| 8 Spectrometer Frequency | 100.59              |
| 9 Spectral Width         | 24038.5             |

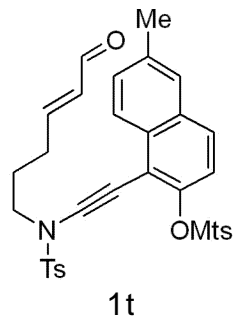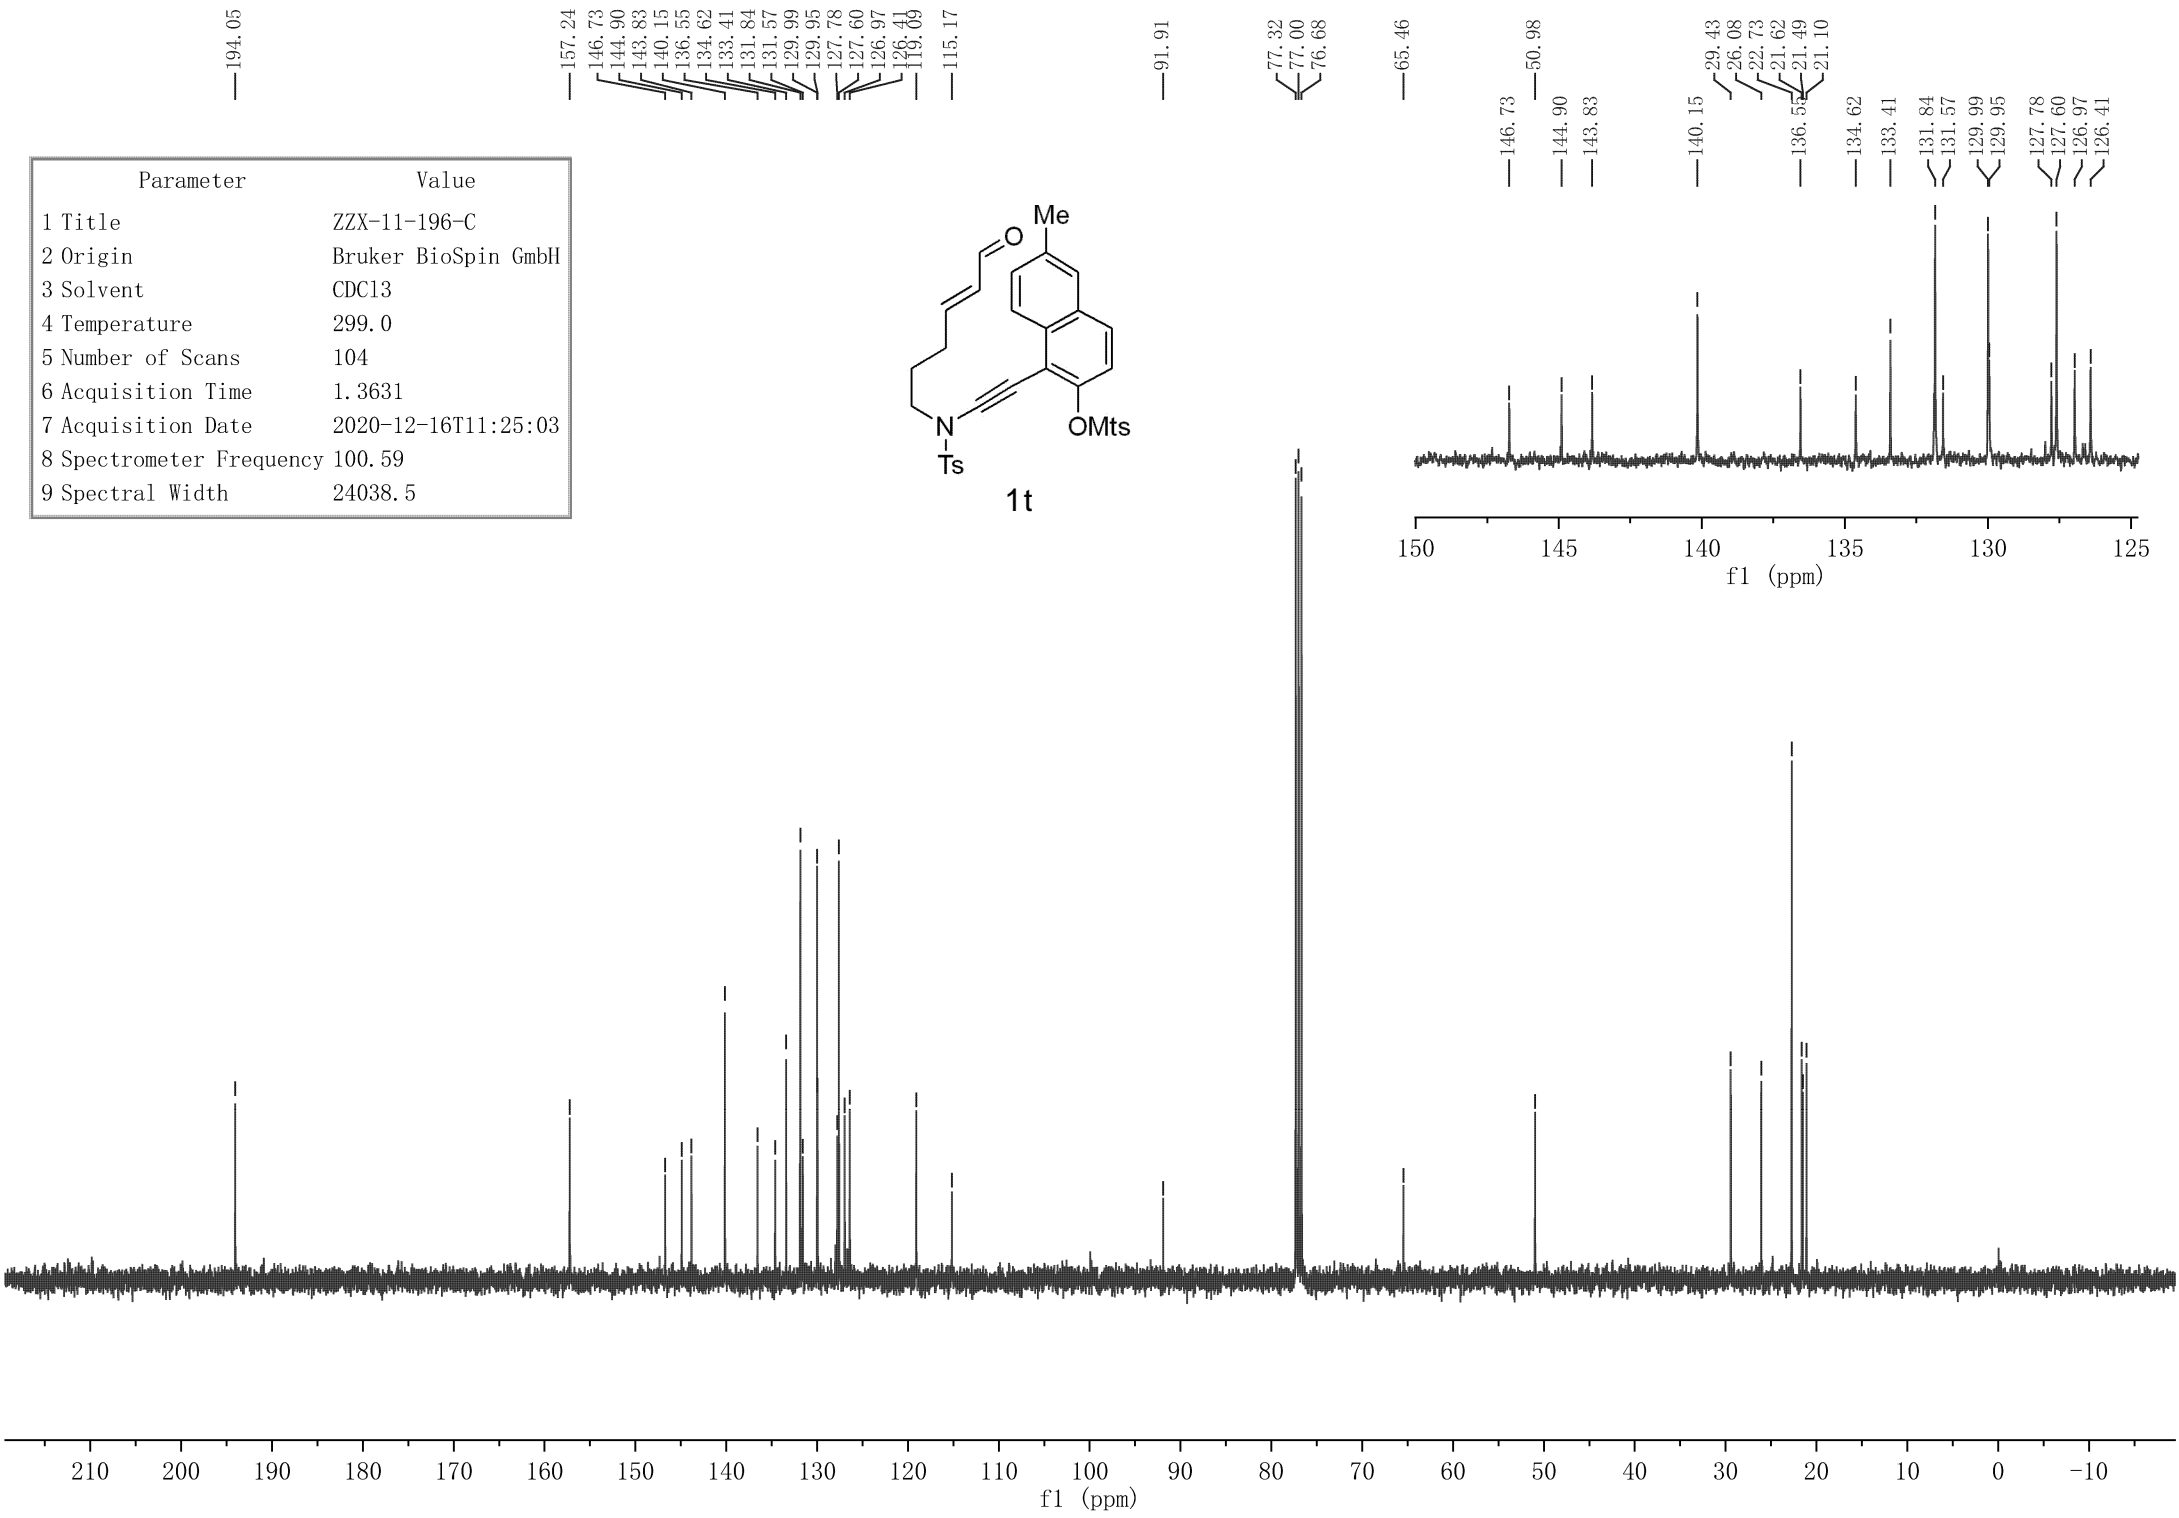



9.502  
9.482

8.235  
8.212

7.911  
7.890

7.428  
7.405

7.361  
7.340

7.284  
7.278

7.056  
7.051

6.990  
6.988  
6.986

6.518  
6.160

6.141  
6.121  
6.102

3.898

3.568  
3.550  
3.533

2.530  
2.496  
2.478

2.459  
2.439

2.346  
2.137

2.120  
2.101

2.083  
2.065

0.000

| Parameter                | Value               |
|--------------------------|---------------------|
| 1 Title                  | zzx-12-21-H         |
| 2 Origin                 | Bruker BioSpin GmbH |
| 3 Solvent                | CDC13               |
| 4 Temperature            | 298.0               |
| 5 Number of Scans        | 5                   |
| 6 Acquisition Time       | 4.0894              |
| 7 Acquisition Date       | 2021-01-01T16:43:17 |
| 8 Spectrometer Frequency | 400.13              |
| 9 Spectral Width         | 8012.8              |

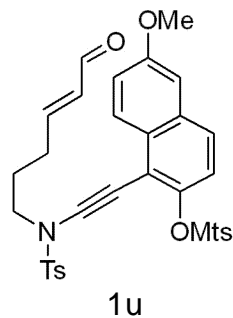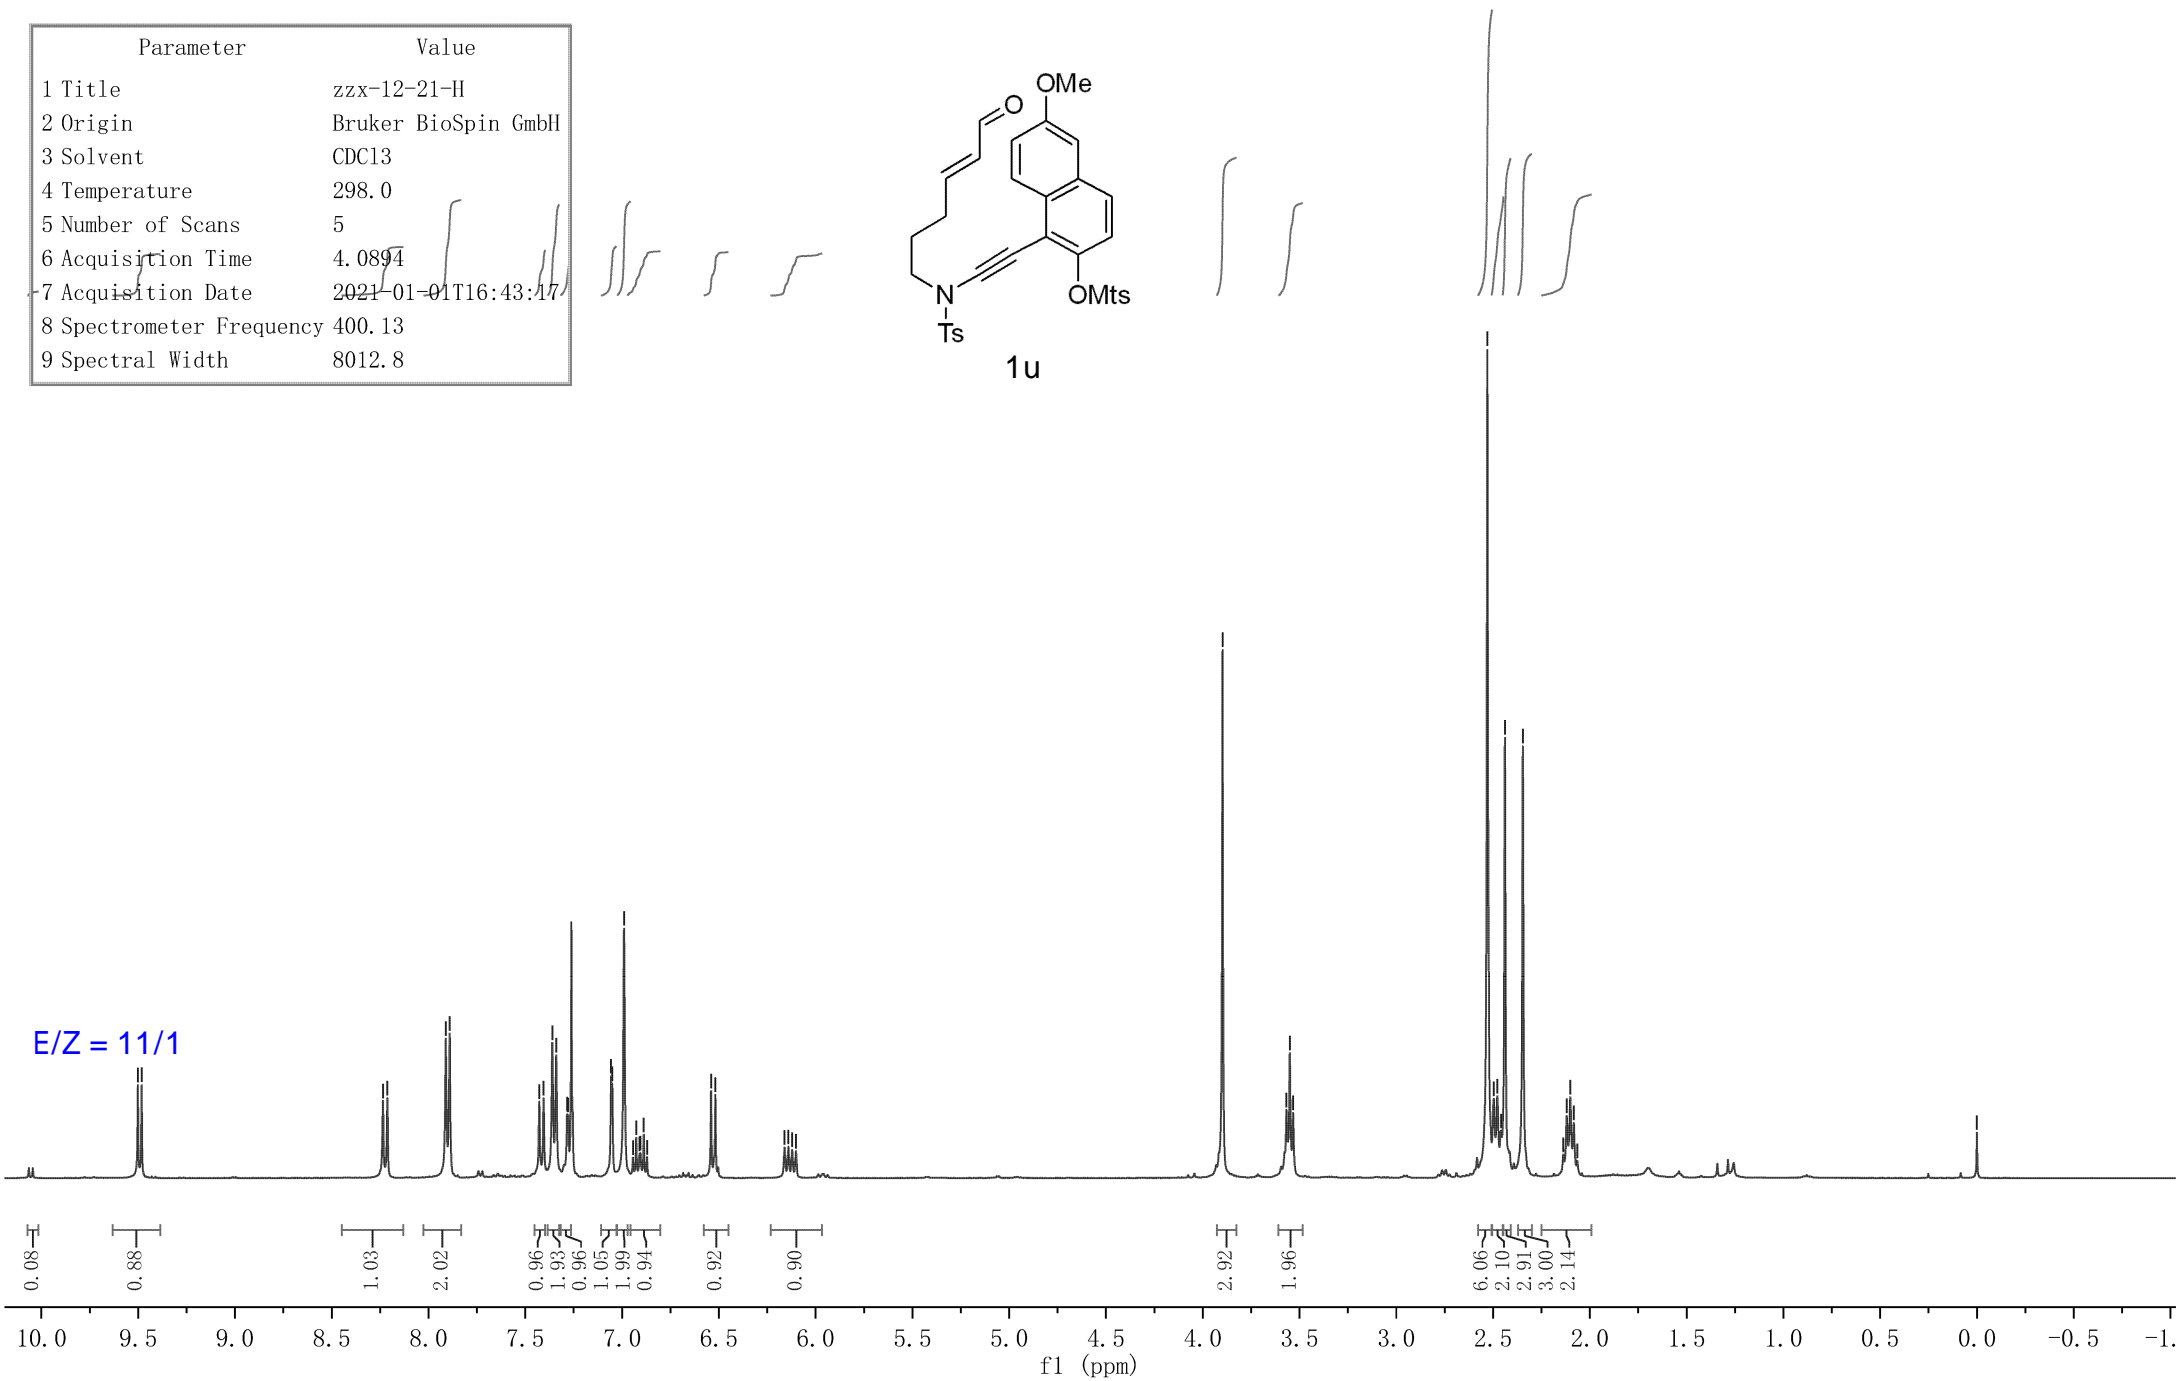

| Parameter                | Value               |
|--------------------------|---------------------|
| 1 Title                  | zzx-12-21-C         |
| 2 Origin                 | Bruker BioSpin GmbH |
| 3 Solvent                | CDC13               |
| 4 Temperature            | 300.0               |
| 5 Number of Scans        | 39                  |
| 6 Acquisition Time       | 1.3631              |
| 7 Acquisition Date       | 2021-01-01T16:44:40 |
| 8 Spectrometer Frequency | 100.61              |
| 9 Spectral Width         | 24038.5             |

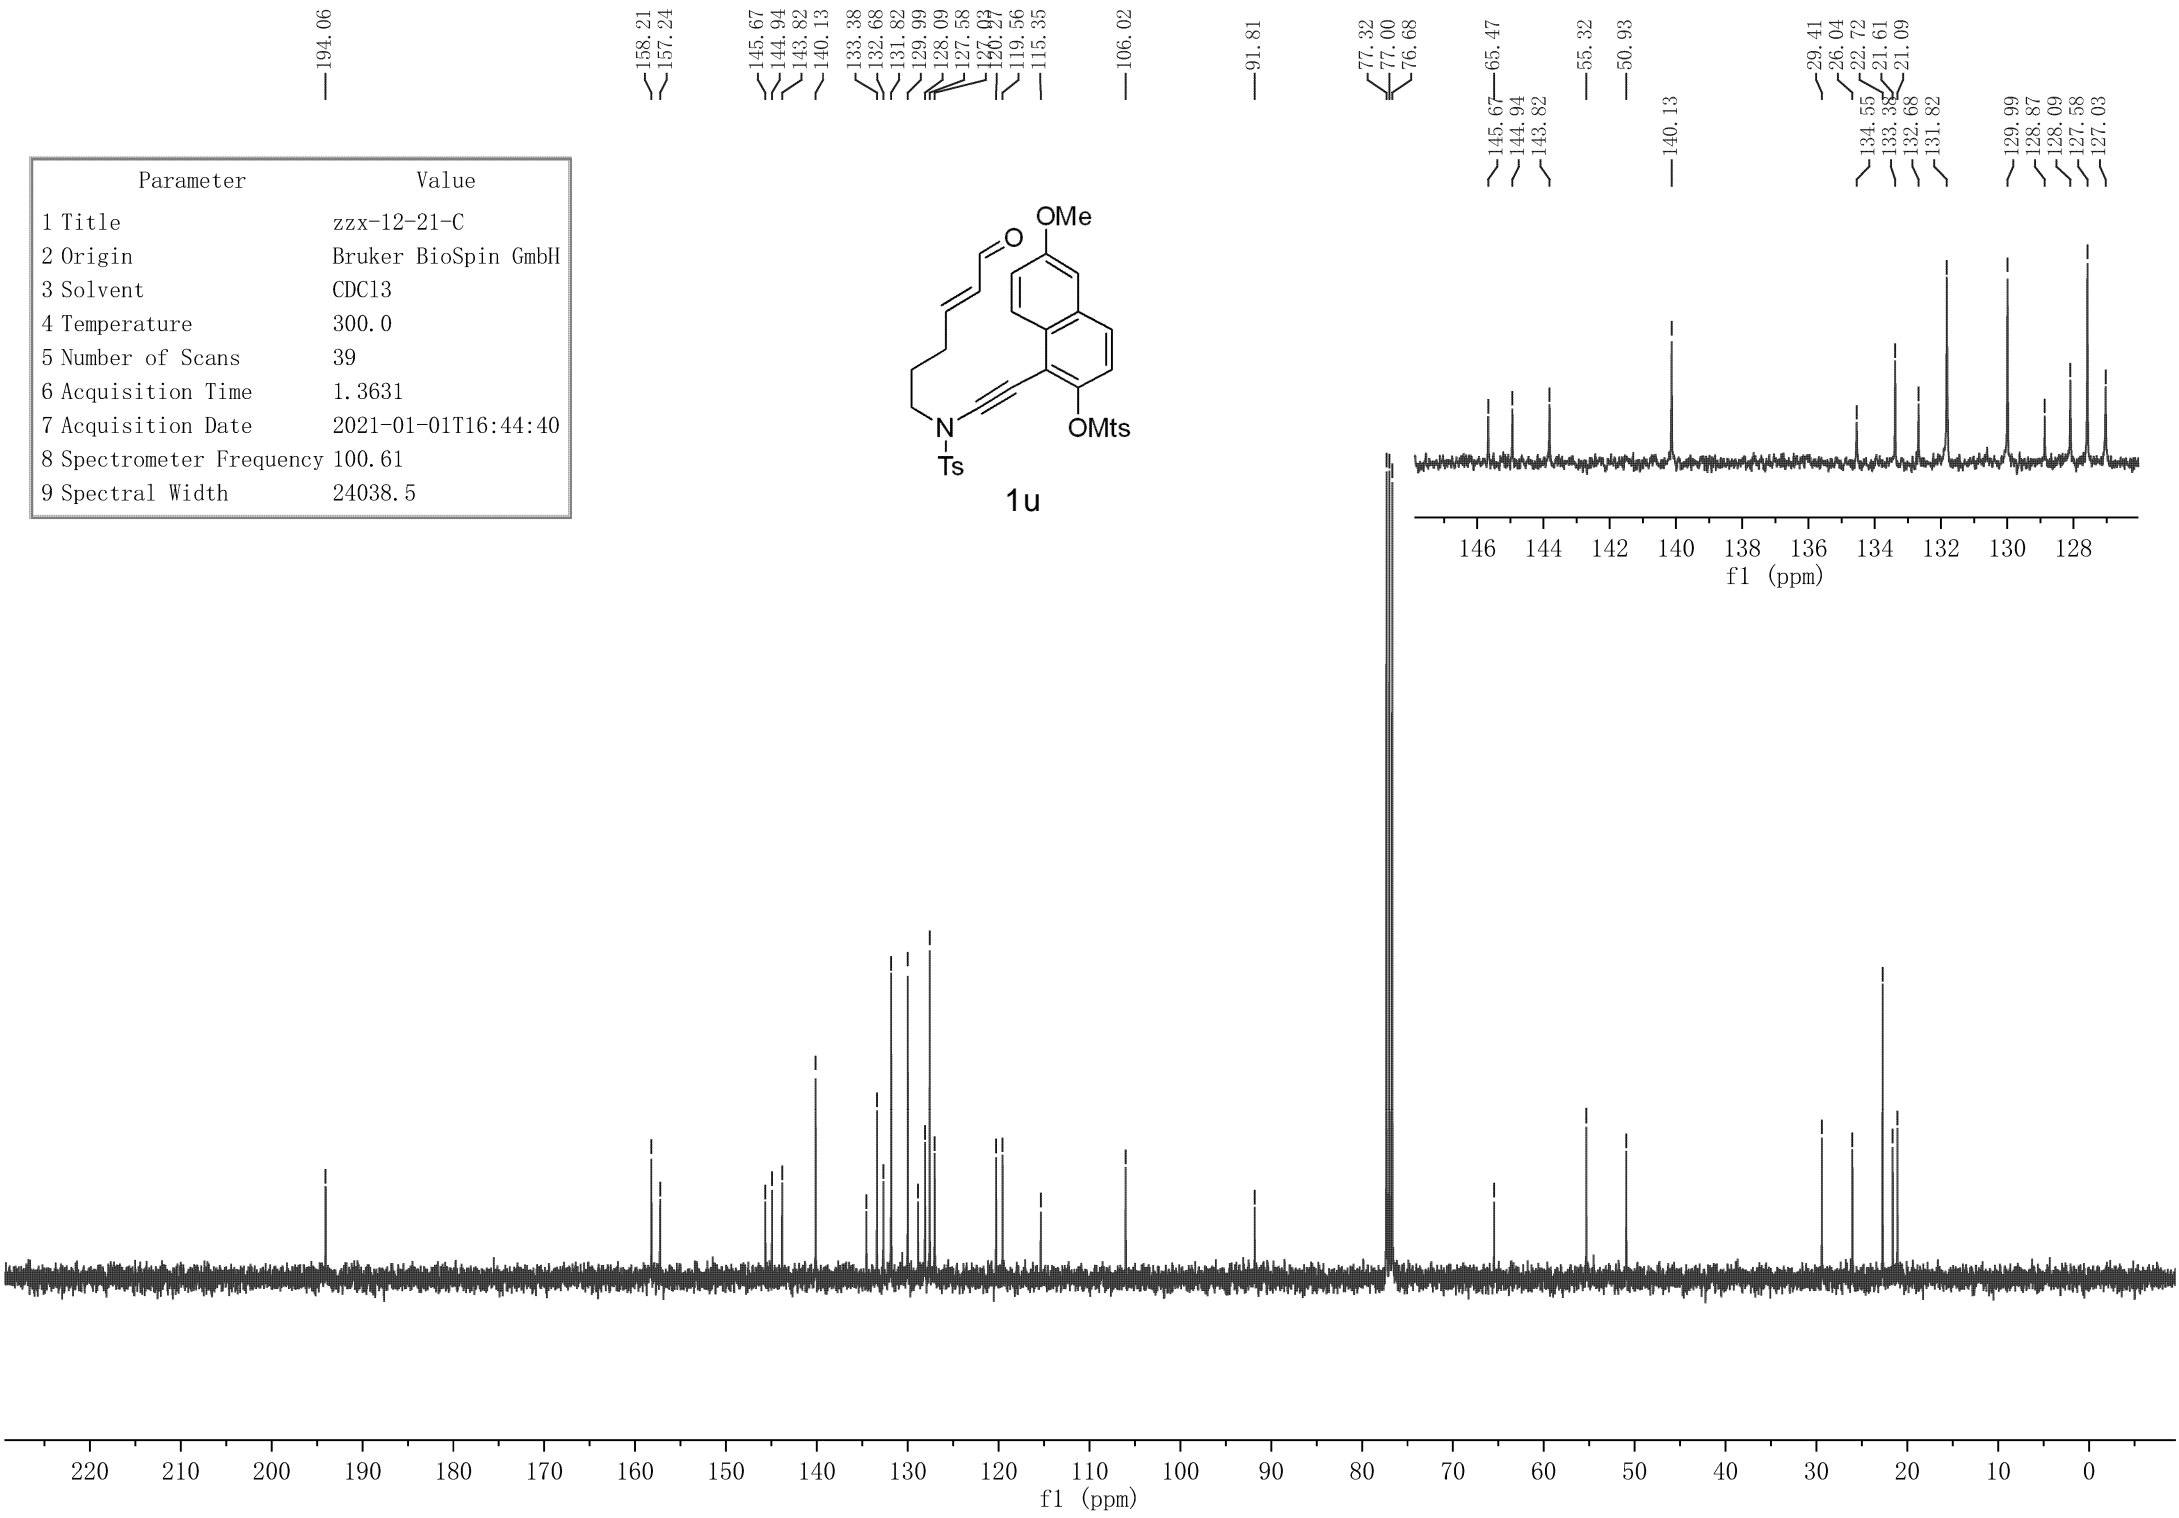

9.511  
9.492

8.474  
8.470

7.945  
7.924

7.623  
7.584

7.501  
7.415

7.395  
7.000

6.952  
6.935

6.896  
6.638

6.616  
6.174

6.154  
6.135

6.115

3.602  
3.584  
3.567

2.583  
2.541

2.508  
2.491

2.474  
2.471

2.448  
2.346

2.137  
2.120

2.100  
2.083

2.065

0.000

| Parameter                | Value               |
|--------------------------|---------------------|
| 1 Title                  | zzx-11-118-H        |
| 2 Origin                 | Bruker BioSpin GmbH |
| 3 Solvent                | CDC13               |
| 4 Temperature            | 298.0               |
| 5 Number of Scans        | 5                   |
| 6 Acquisition Time       | 1.0894              |
| 7 Acquisition Date       | 2020-11-13T09:51:32 |
| 8 Spectrometer Frequency | 400.13              |
| 9 Spectral Width         | 8012.8              |

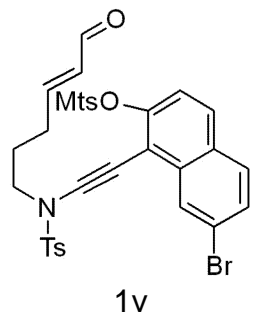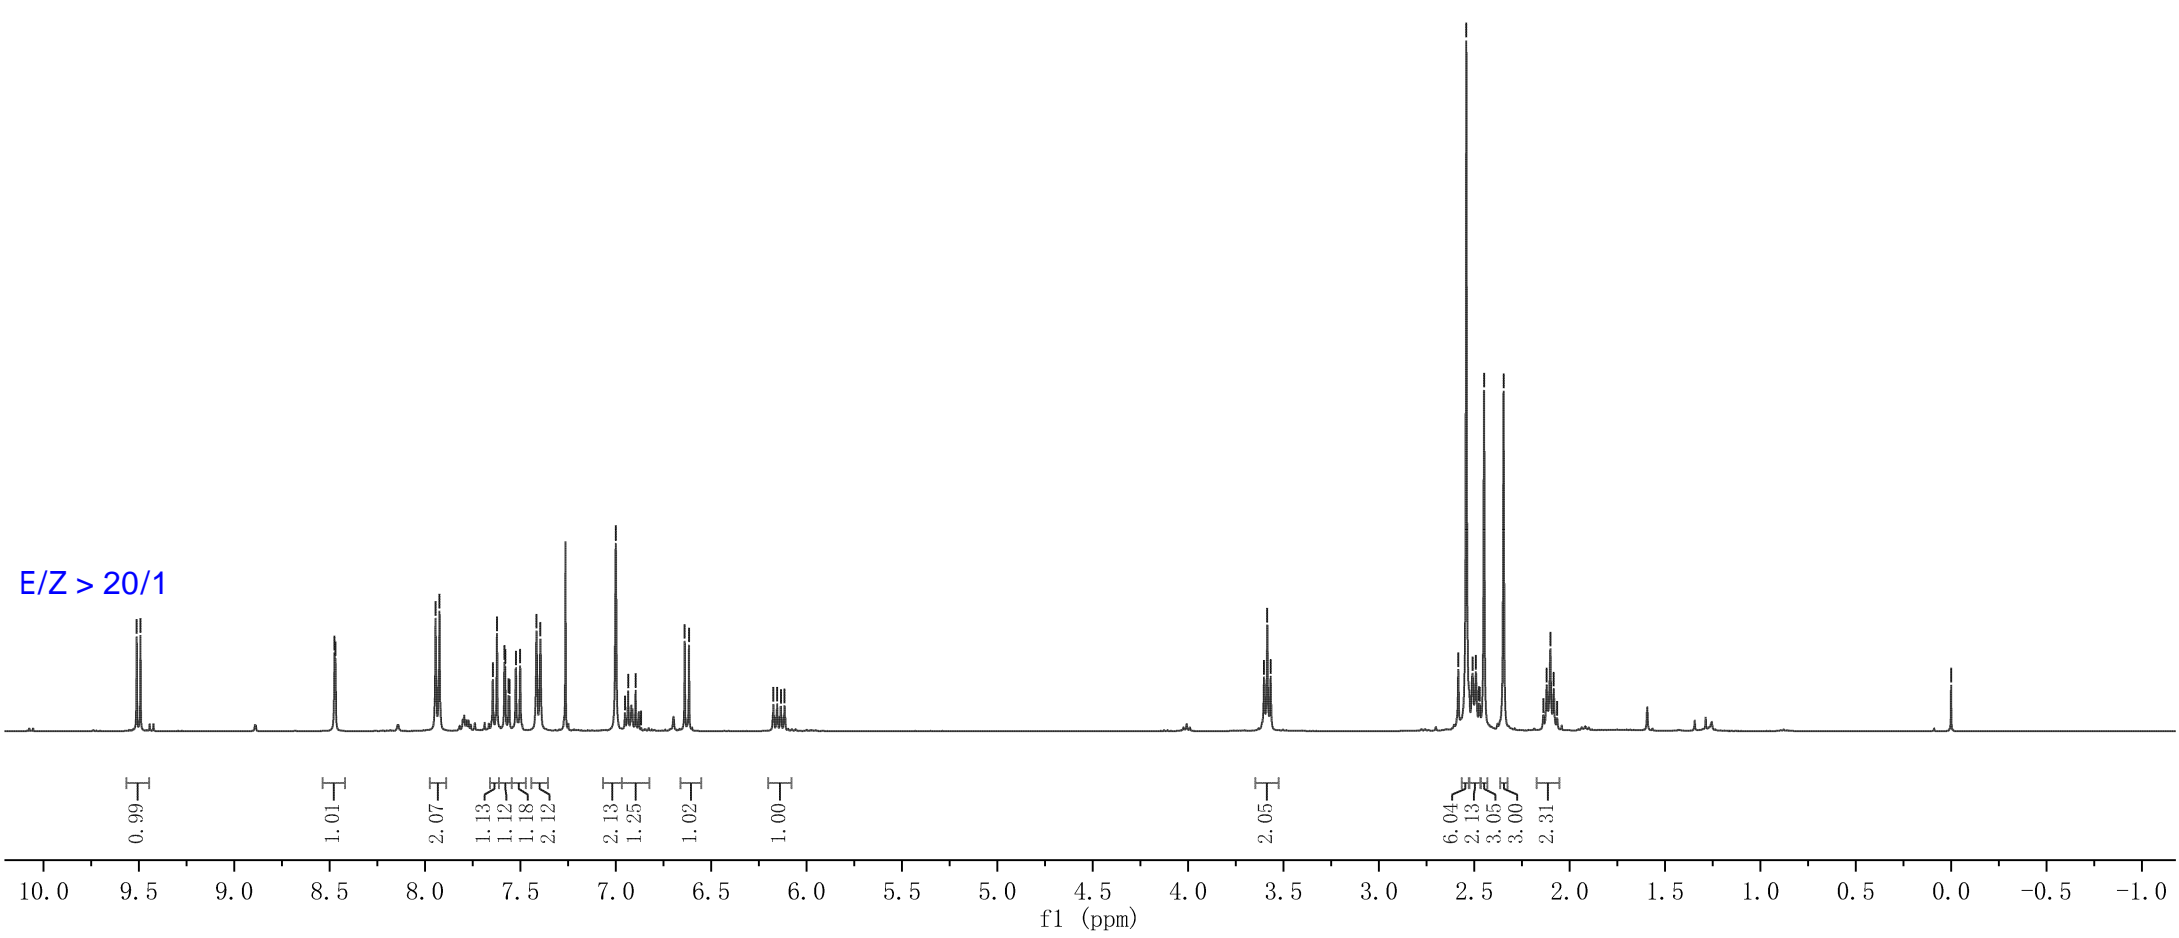

| Parameter                | Value               |
|--------------------------|---------------------|
| 1 Title                  | zzx-11-118-C        |
| 2 Origin                 | Bruker BioSpin GmbH |
| 3 Solvent                | CDC13               |
| 4 Temperature            | 300.0               |
| 5 Number of Scans        | 14                  |
| 6 Acquisition Time       | 1.3631              |
| 7 Acquisition Date       | 2020-11-13T09:52:40 |
| 8 Spectrometer Frequency | 100.61              |
| 9 Spectral Width         | 24038.5             |

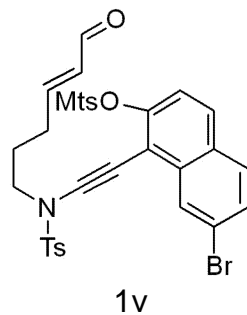

—194.02  
 —157.12  
 —147.99  
 —145.06  
 —144.05  
 —140.11  
 —133.40  
 —131.89  
 —130.14  
 —130.08  
 —129.63  
 —128.58  
 —119.65  
 —114.67  
 —92.61  
 —77.32  
 —77.00  
 —76.68  
 —64.76  
 —50.97  
 —29.37  
 —26.08  
 —22.71  
 —21.65  
 —21.09  
 —134.71  
 —134.43  
 —133.40  
 —131.89  
 —131.57  
 —130.14  
 —130.08  
 —129.72  
 —129.63  
 —128.76  
 —128.37  
 —127.53

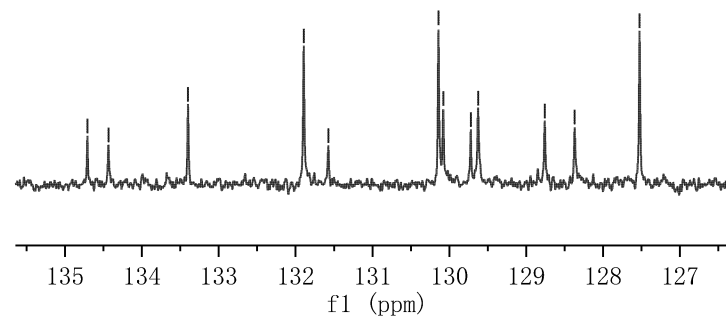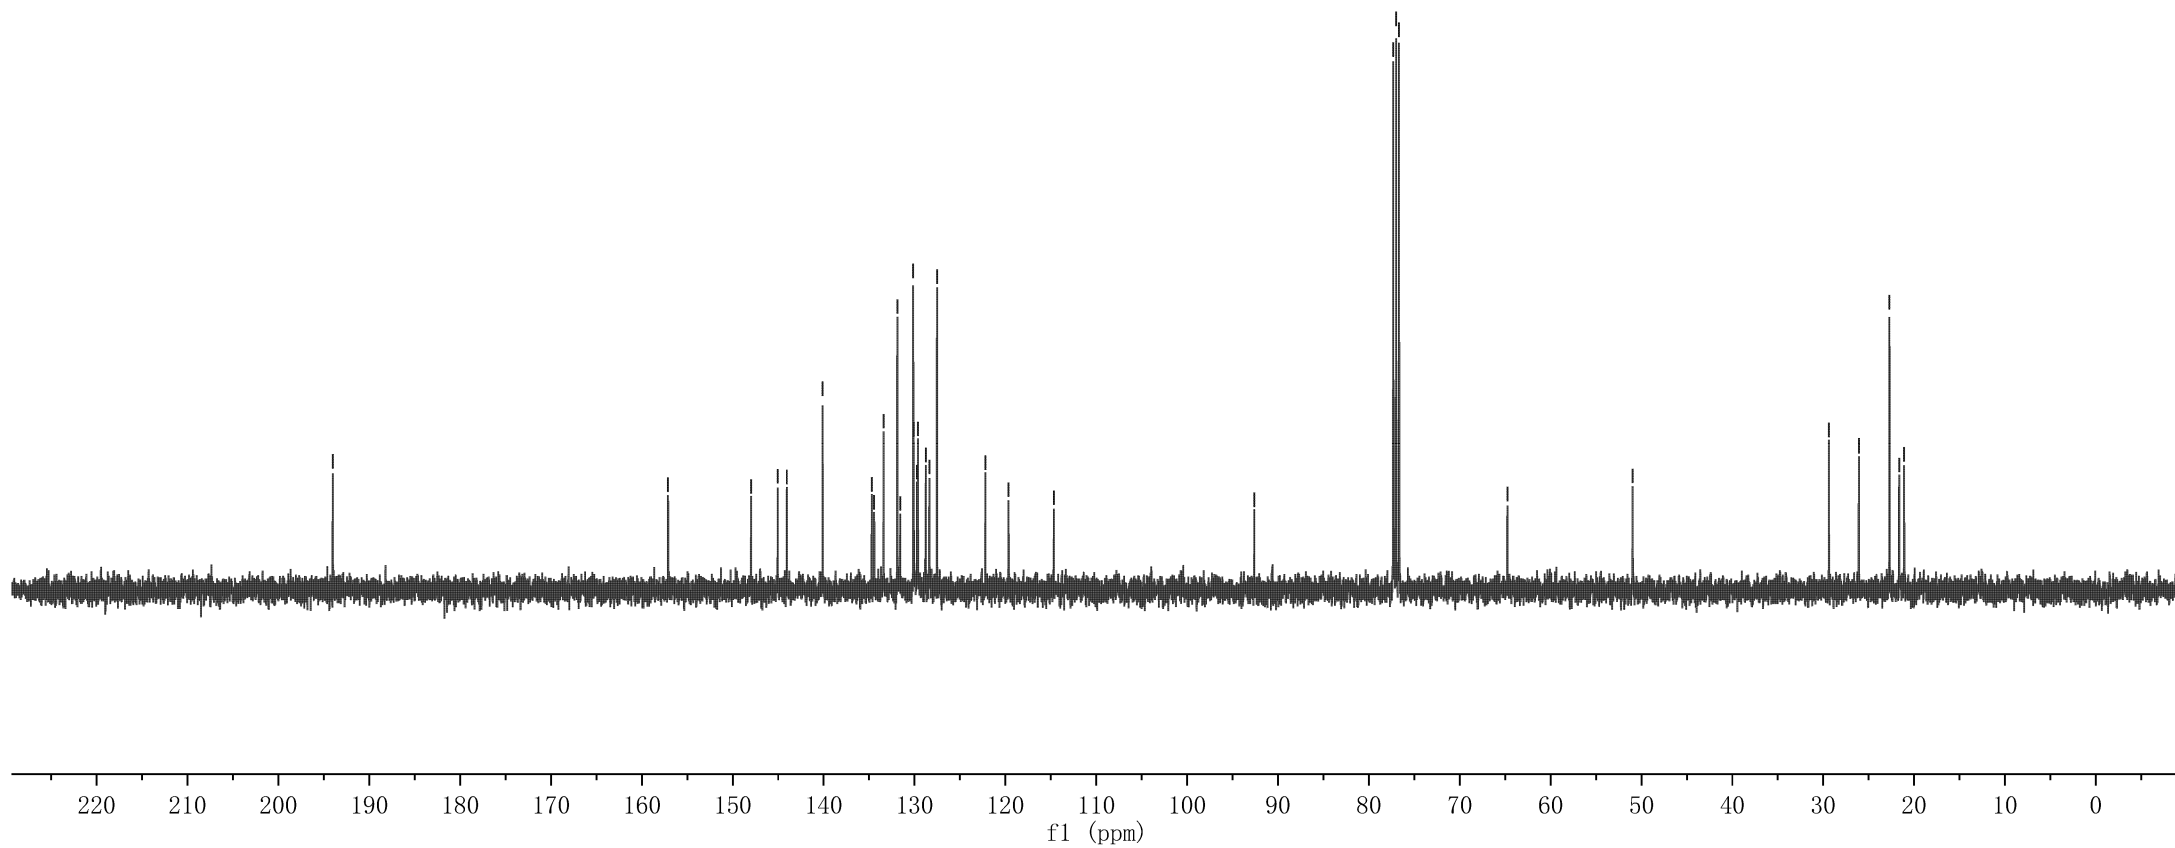

| Parameter                | Value               |
|--------------------------|---------------------|
| 1 Title                  | zzx-11-163-H        |
| 2 Origin                 | Bruker BioSpin GmbH |
| 3 Solvent                | CDC13               |
| 4 Temperature            | 298.0               |
| 5 Number of Scans        | 13                  |
| 6 Acquisition Time       | 4.0894              |
| 7 Acquisition Date       | 2020-11-29T14:49:12 |
| 8 Spectrometer Frequency | 400.13              |
| 9 Spectral Width         | 8012.8              |

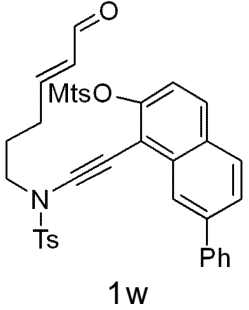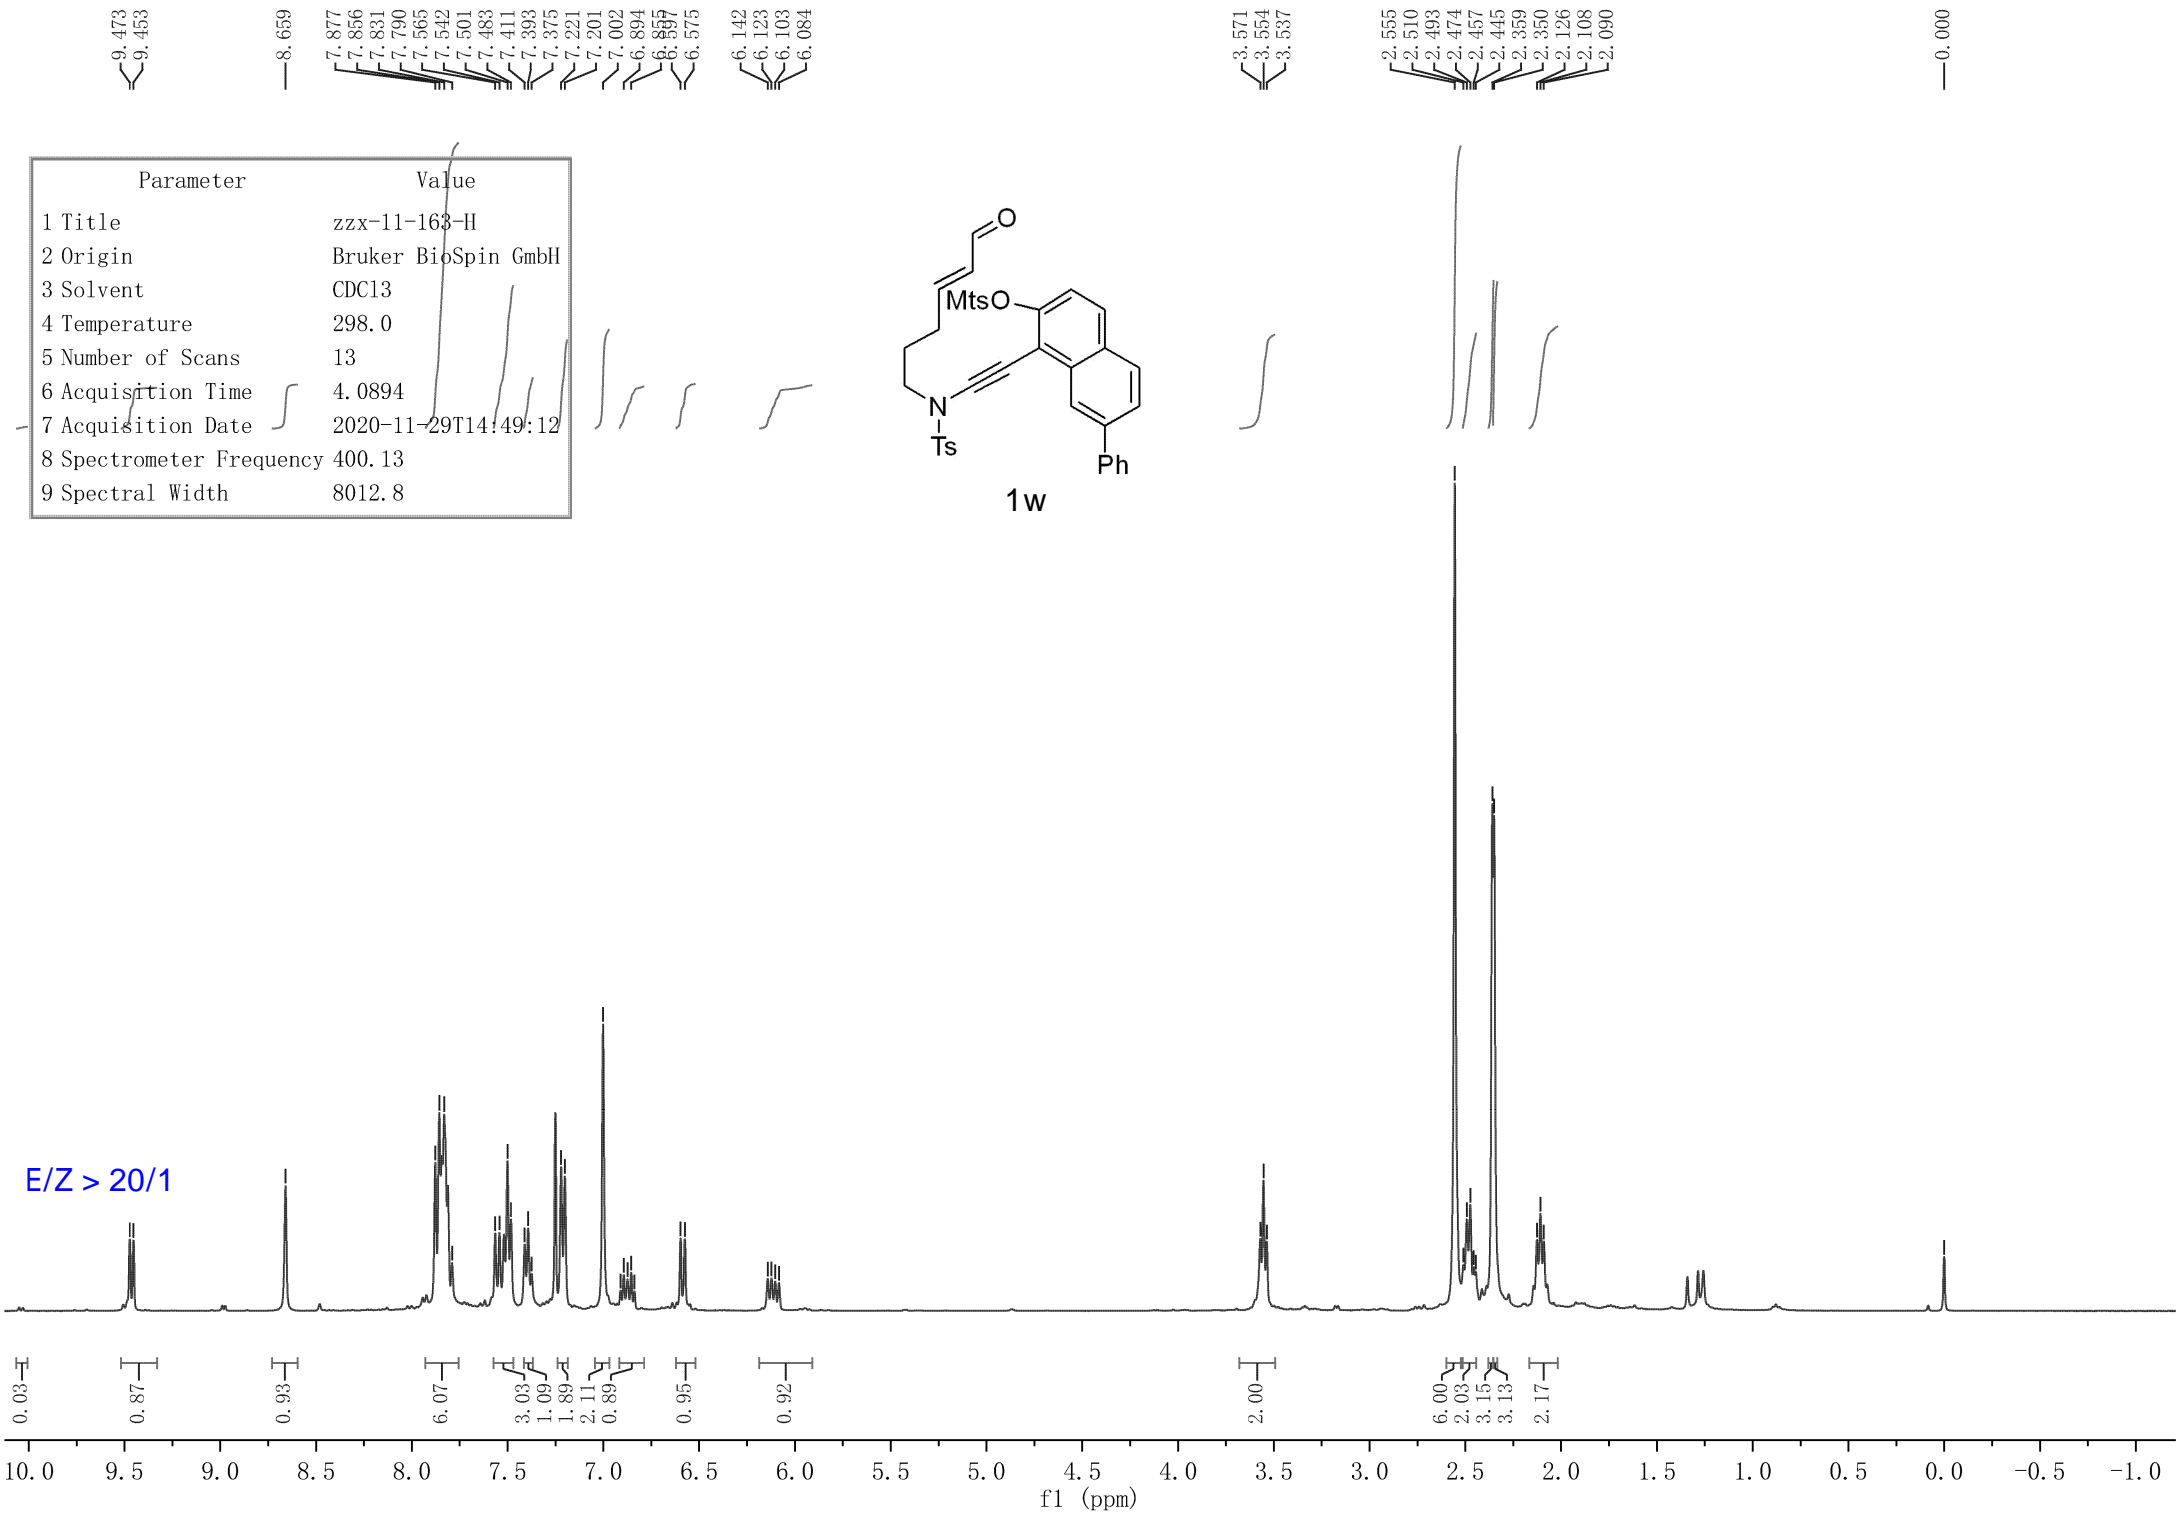

| Parameter                | Value               |
|--------------------------|---------------------|
| 1 Title                  | zzx-11-163-C        |
| 2 Origin                 | Bruker BioSpin GmbH |
| 3 Solvent                | CDC13               |
| 4 Temperature            | 300.0               |
| 5 Number of Scans        | 80                  |
| 6 Acquisition Time       | 1.3631              |
| 7 Acquisition Date       | 2020-11-29T14:51:19 |
| 8 Spectrometer Frequency | 100.61              |
| 9 Spectral Width         | 24038.5             |

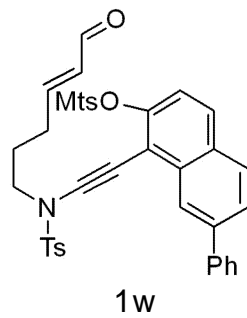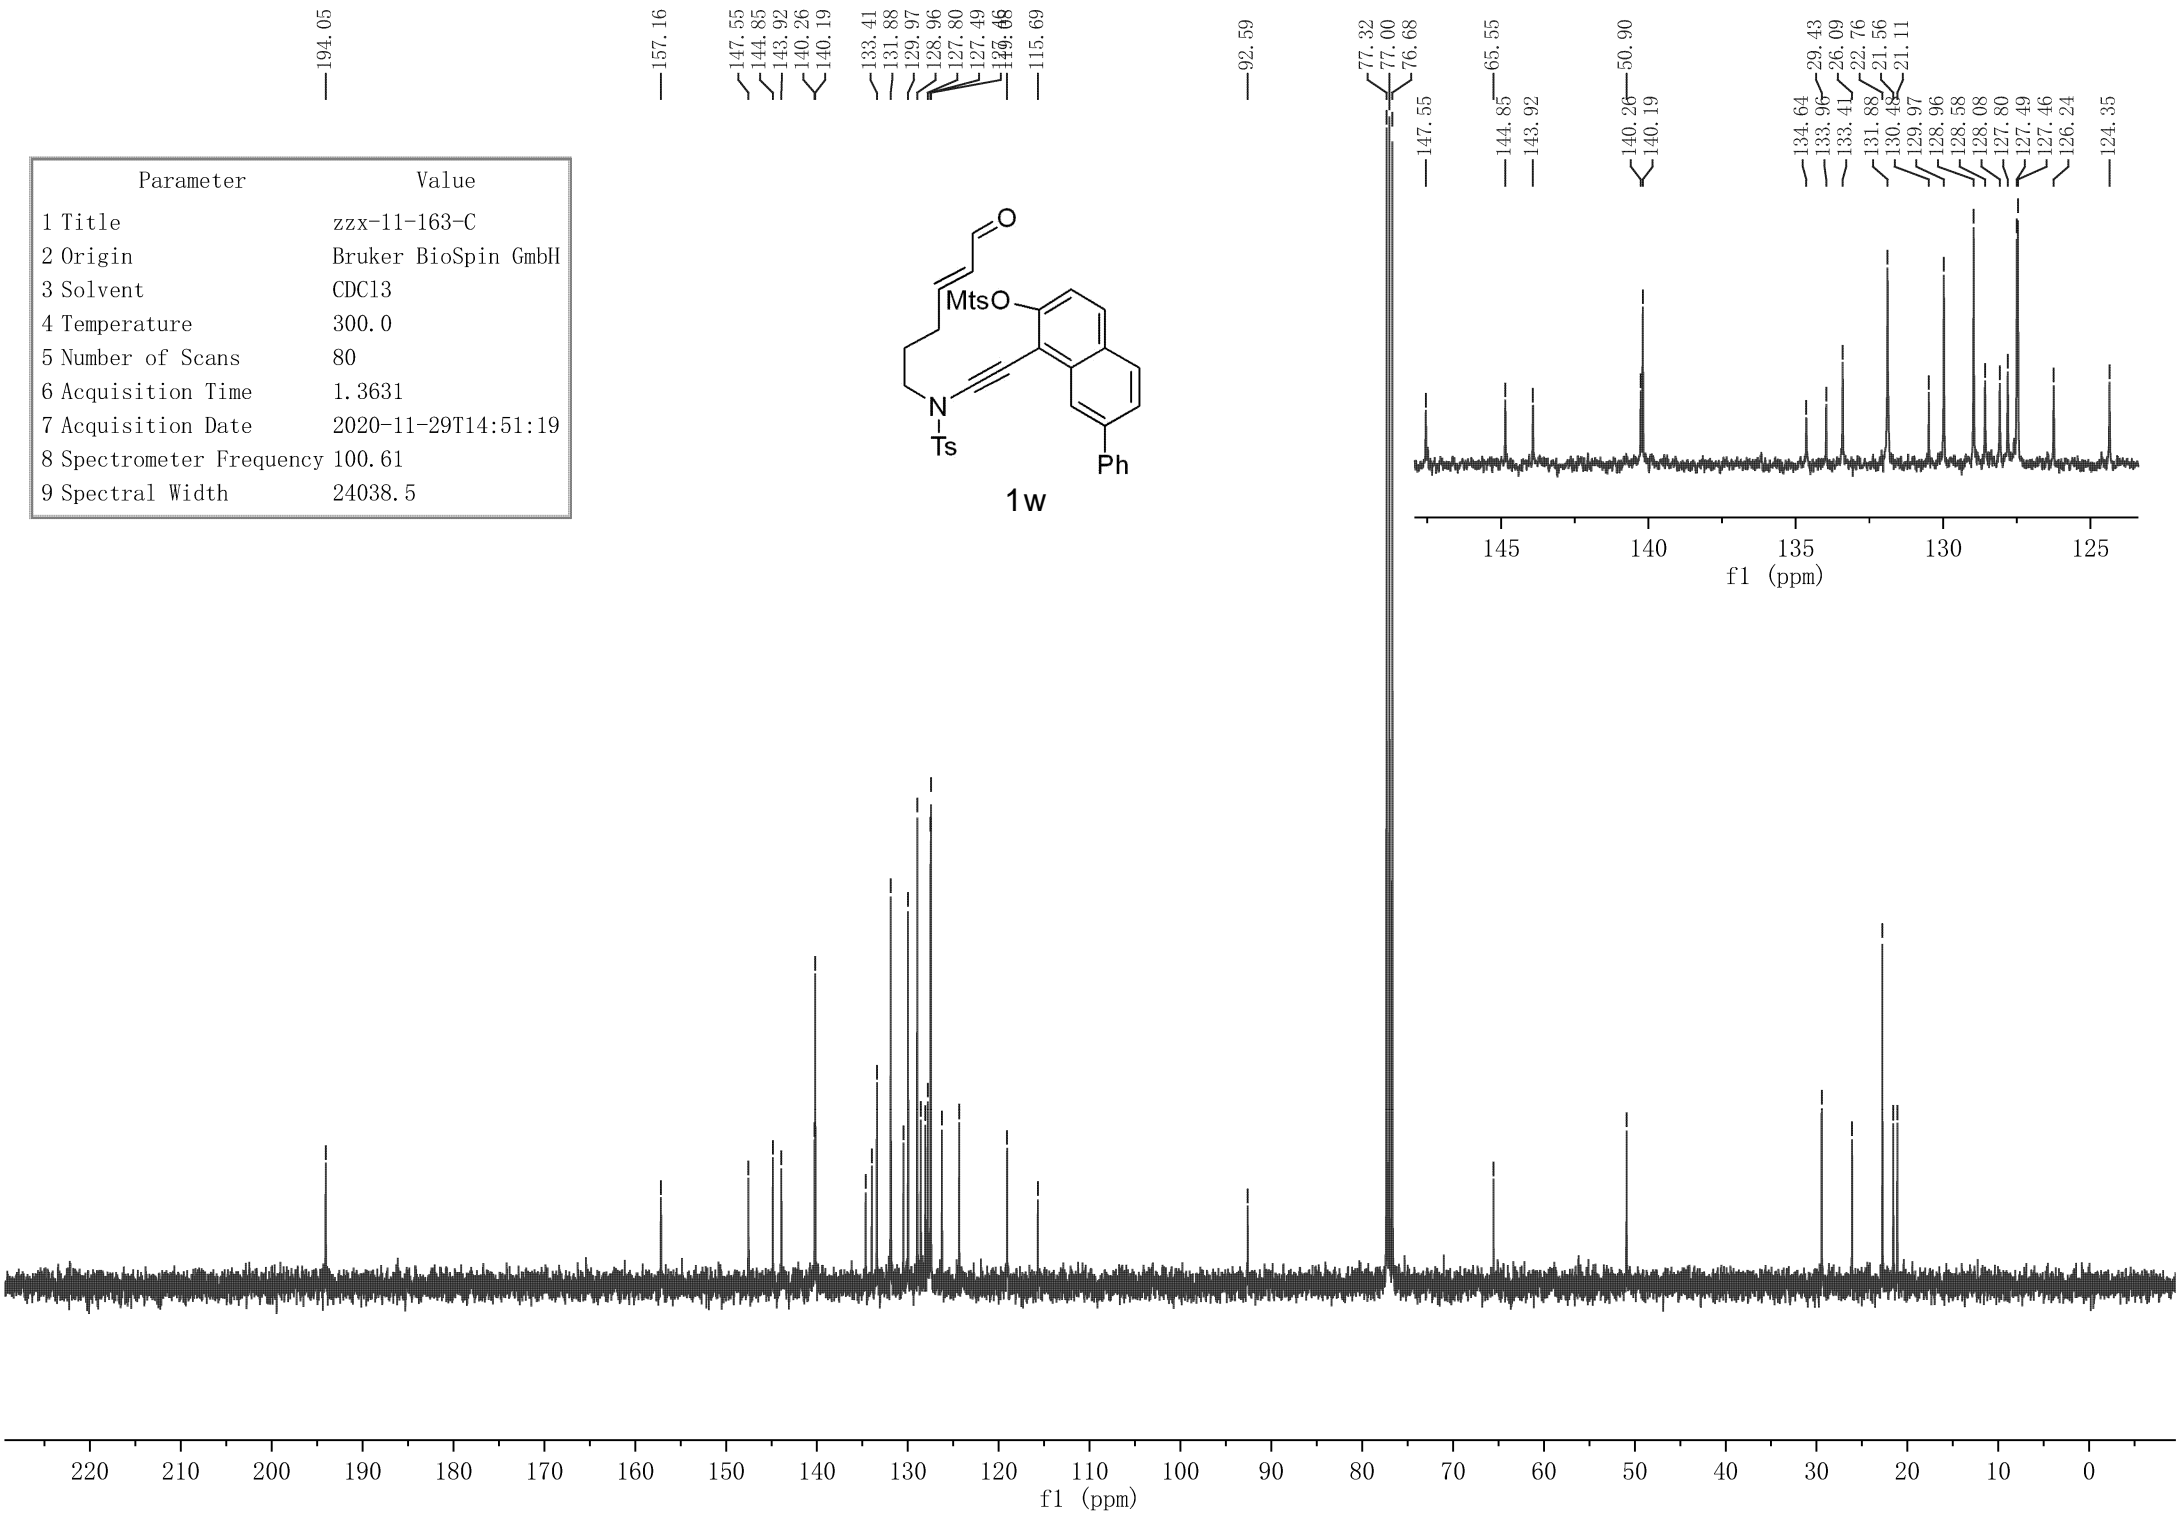

9.500  
9.480

8.163  
8.162  
7.929  
7.908  
7.655  
7.482  
7.359  
7.339  
7.338  
6.984  
6.925  
6.886  
6.869  
6.859  
6.506  
6.164  
6.141  
6.121  
6.098

3.573  
3.556  
3.538

2.571  
2.532  
2.500  
2.483  
2.467  
2.463  
2.431  
2.339  
2.140  
2.122  
2.103  
2.085  
2.067

0.000

| Parameter                | Value               |
|--------------------------|---------------------|
| 1 Title                  | ZZX-11-197-H        |
| 2 Origin                 | Bruker BioSpin GmbH |
| 3 Solvent                | CDC13               |
| 4 Temperature            | 298.4               |
| 5 Number of Scans        | 10                  |
| 6 Acquisition Time       | 3.9846              |
| 7 Acquisition Date       | 2020-12-16T11:13:00 |
| 8 Spectrometer Frequency | 400.03              |
| 9 Spectral Width         | 8223.7              |

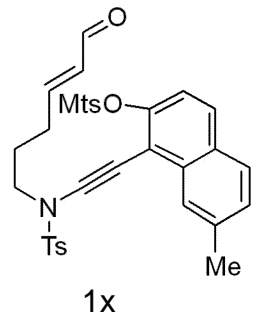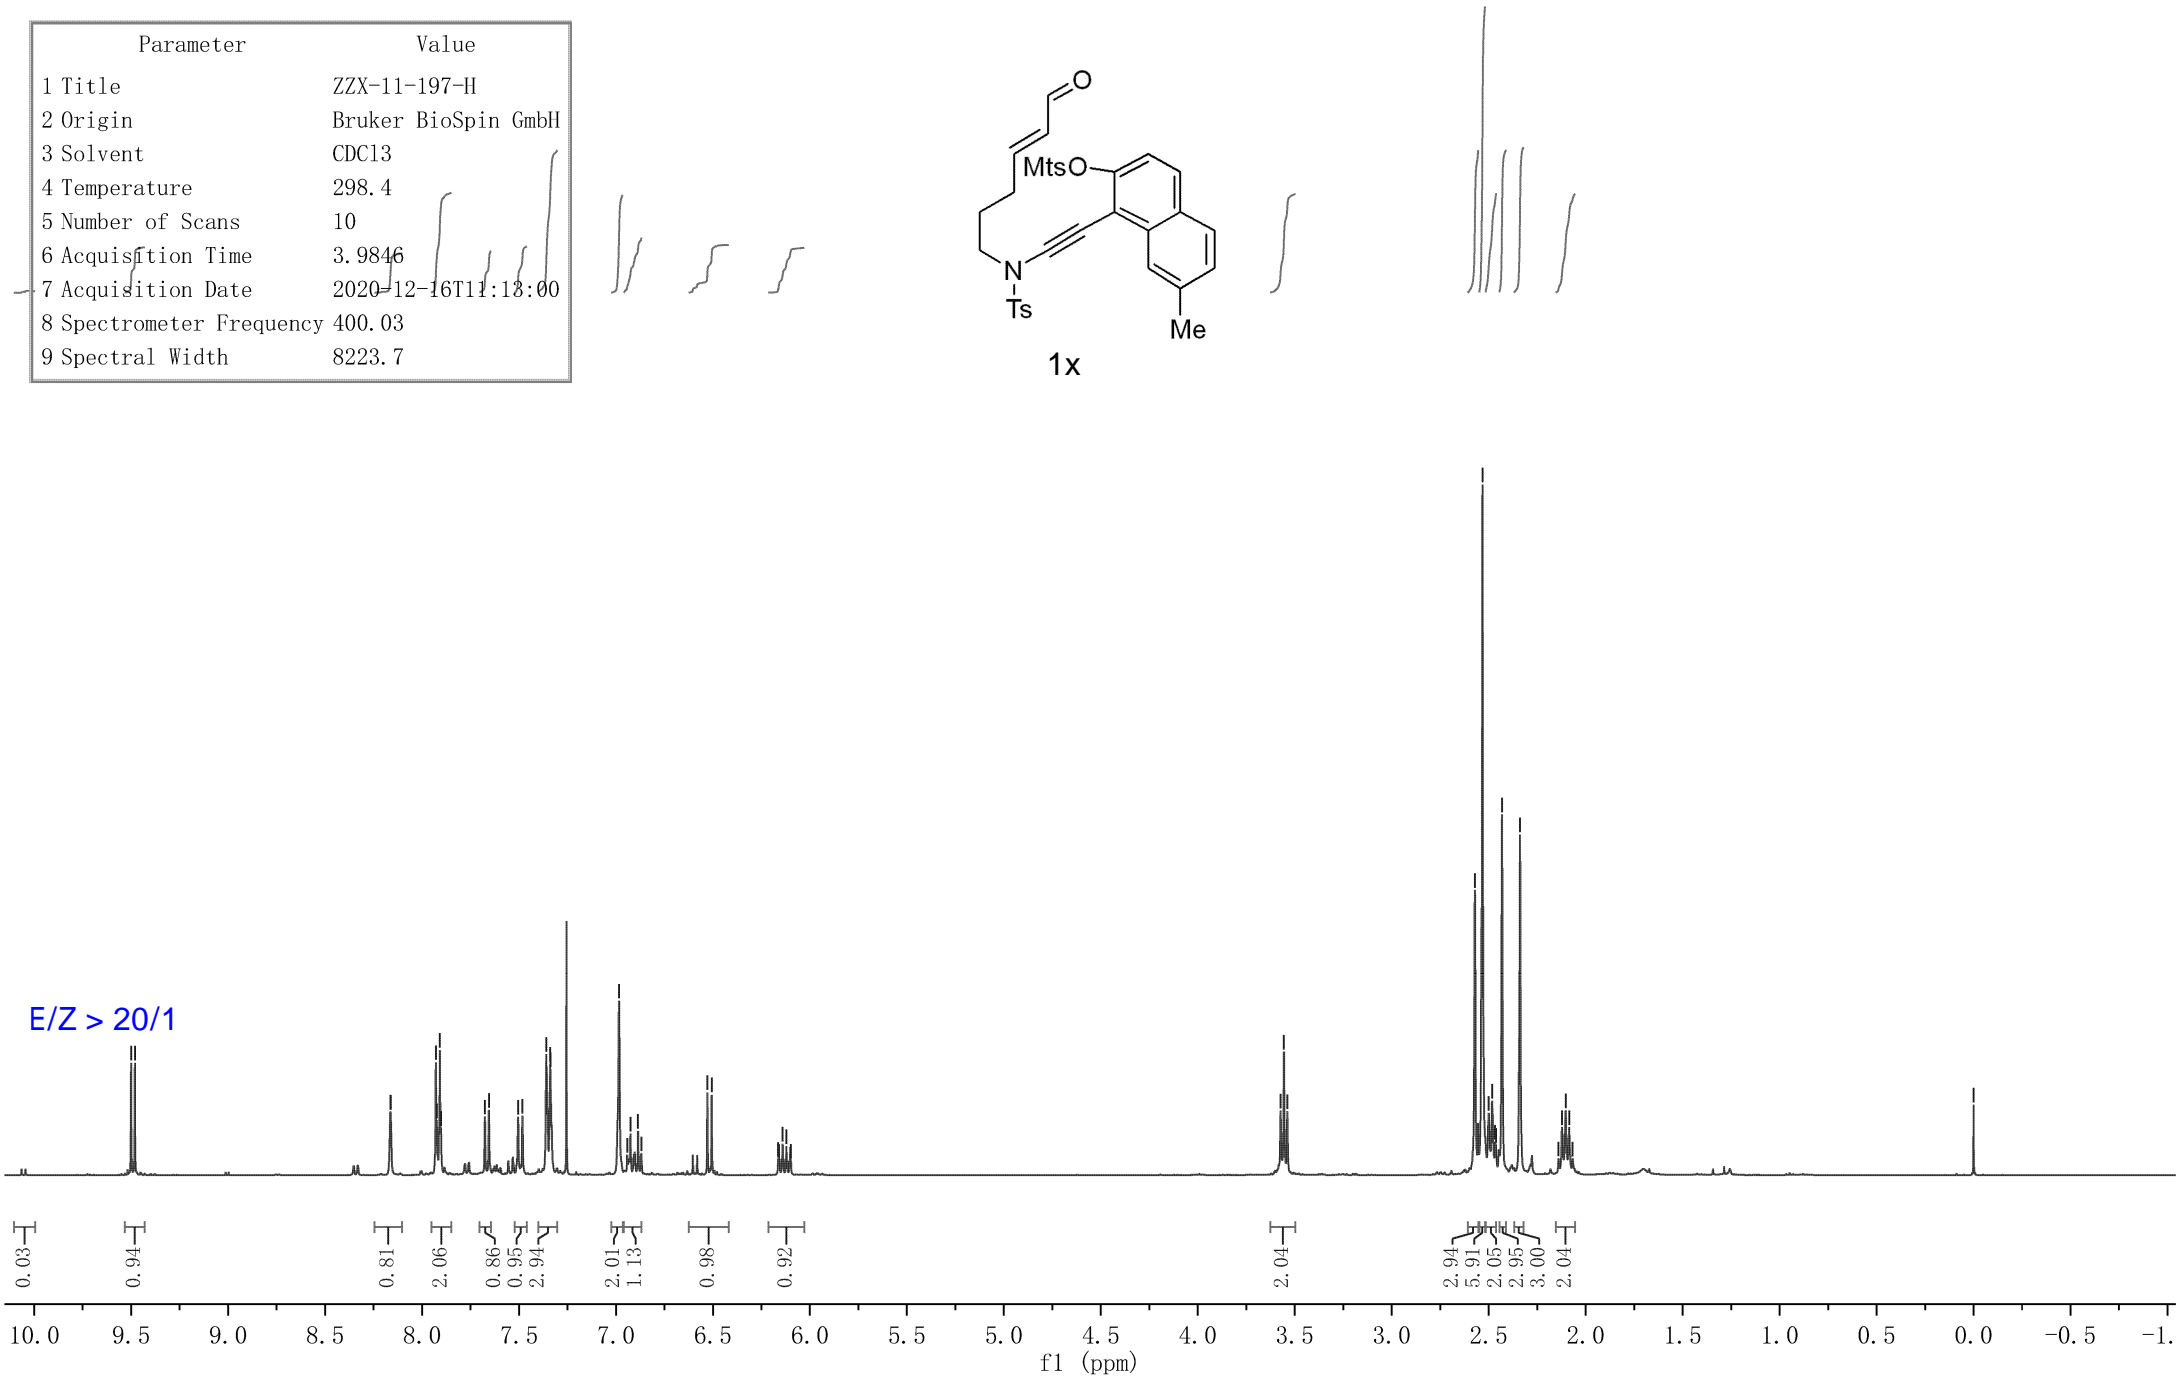

| Parameter                | Value               |
|--------------------------|---------------------|
| 1 Title                  | ZZX-11-197-C        |
| 2 Origin                 | Bruker BioSpin GmbH |
| 3 Solvent                | CDC13               |
| 4 Temperature            | 299.2               |
| 5 Number of Scans        | 71                  |
| 6 Acquisition Time       | 1.3631              |
| 7 Acquisition Date       | 2020-12-16T11:16:00 |
| 8 Spectrometer Frequency | 100.59              |
| 9 Spectral Width         | 24038.5             |

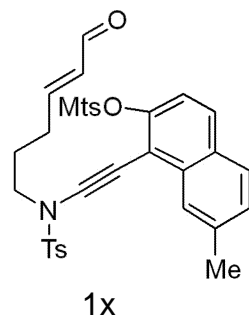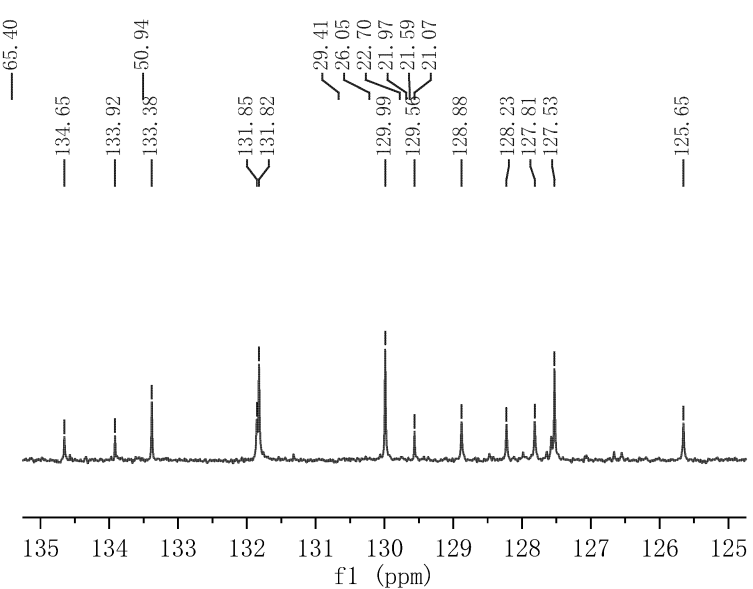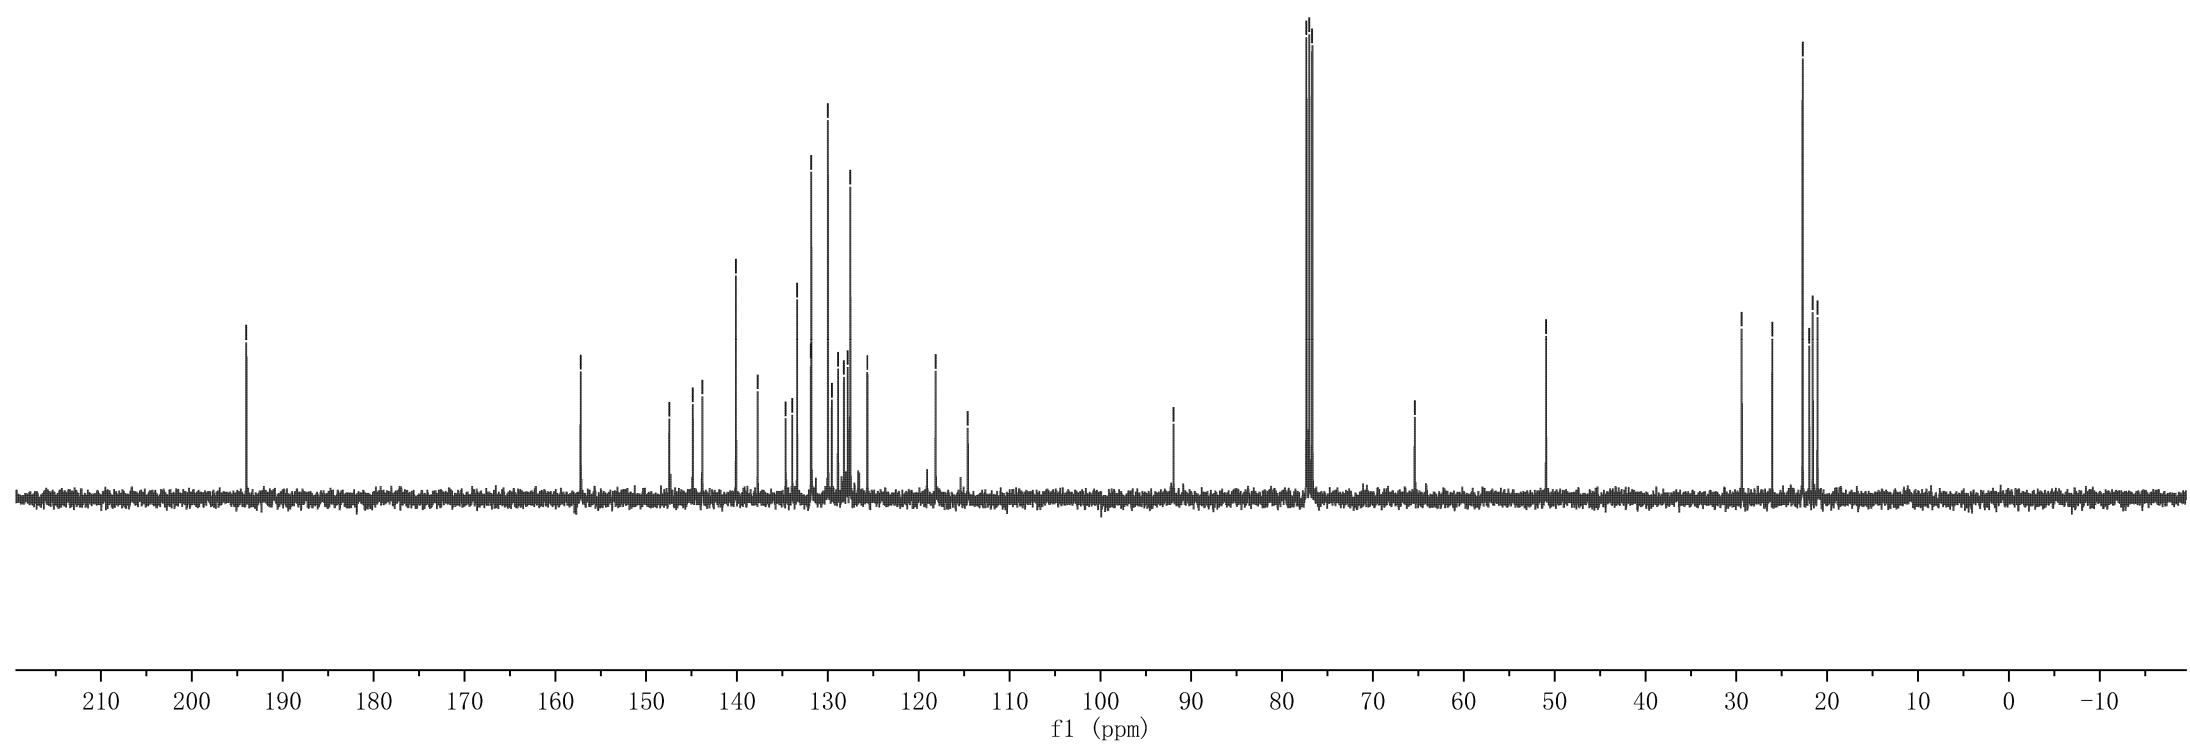

194.00

157.21  
144.86  
143.82  
140.11  
137.72  
133.92  
133.38  
131.85  
131.82  
129.99  
129.56  
128.88  
128.23  
127.81  
127.53  
126.67  
114.59

91.95

77.32  
77.00  
76.68

65.40

134.65  
133.92  
133.38  
50.94

131.85  
131.82

29.41  
26.05  
22.70  
21.97  
21.59  
21.07

128.88  
128.23  
127.81  
127.53

125.65



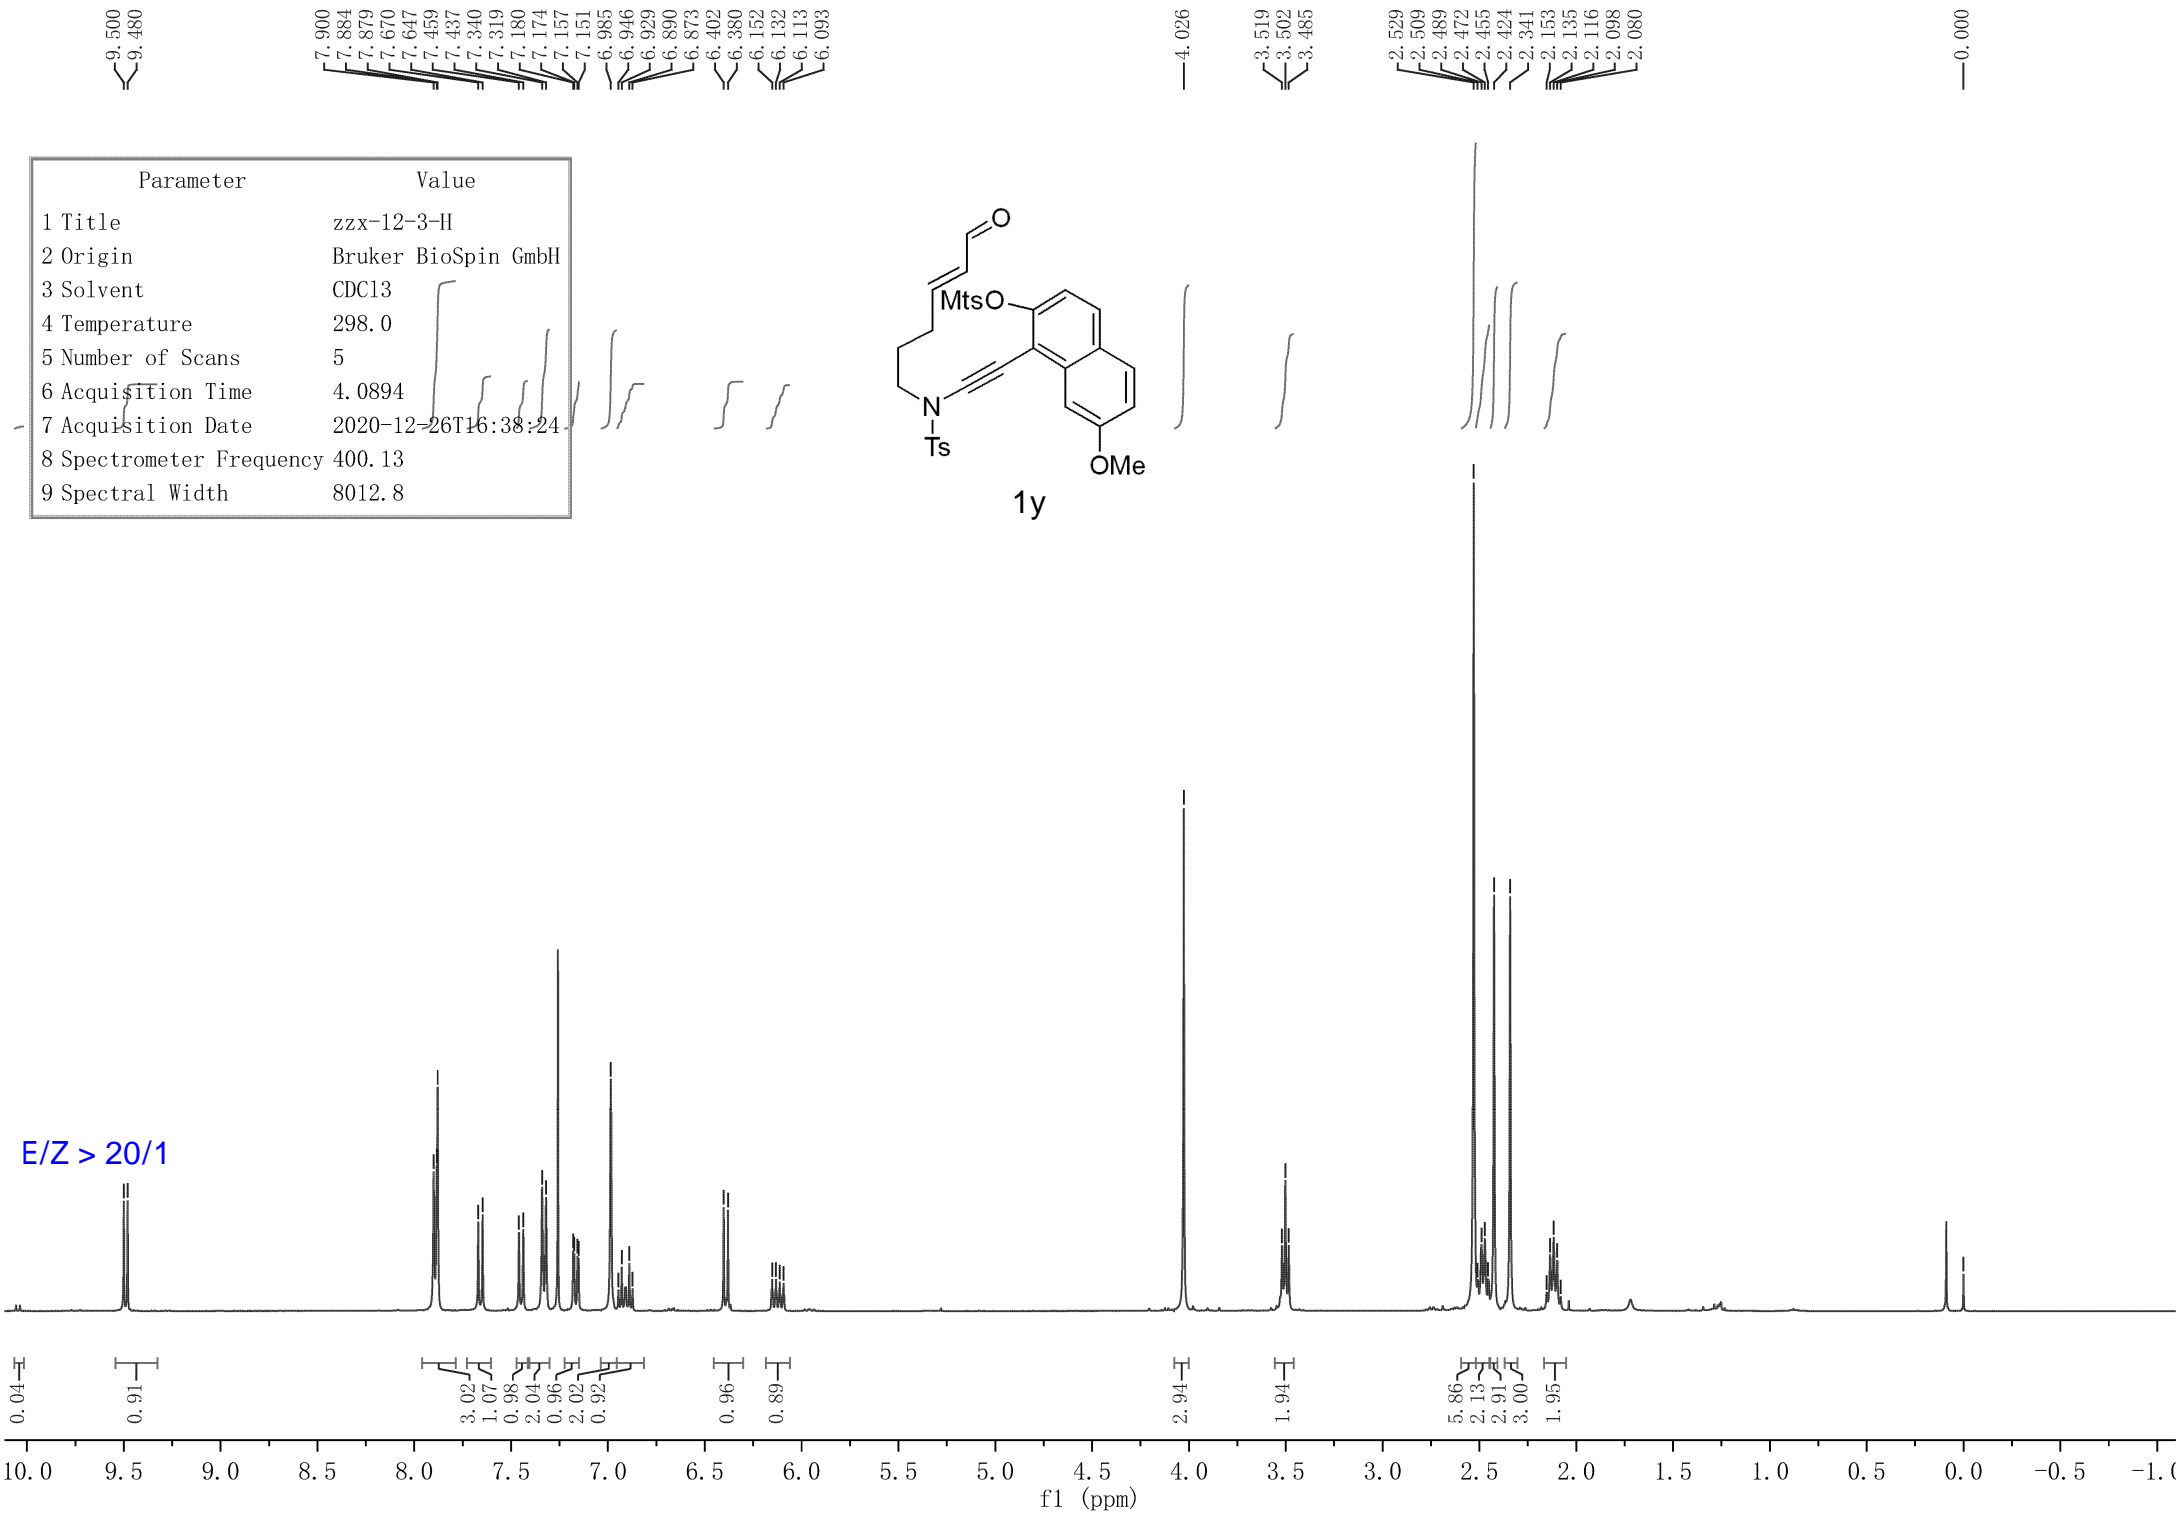

| Parameter                | Value               |
|--------------------------|---------------------|
| 1 Title                  | zzx-12-3-C          |
| 2 Origin                 | Bruker BioSpin GmbH |
| 3 Solvent                | CDC13               |
| 4 Temperature            | 300.0               |
| 5 Number of Scans        | 28                  |
| 6 Acquisition Time       | 1.3631              |
| 7 Acquisition Date       | 2020-12-26T16:40:28 |
| 8 Spectrometer Frequency | 100.61              |
| 9 Spectral Width         | 24038.5             |

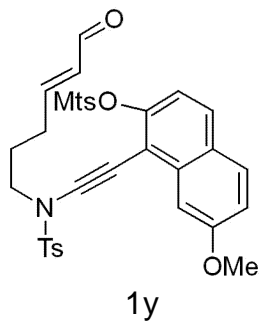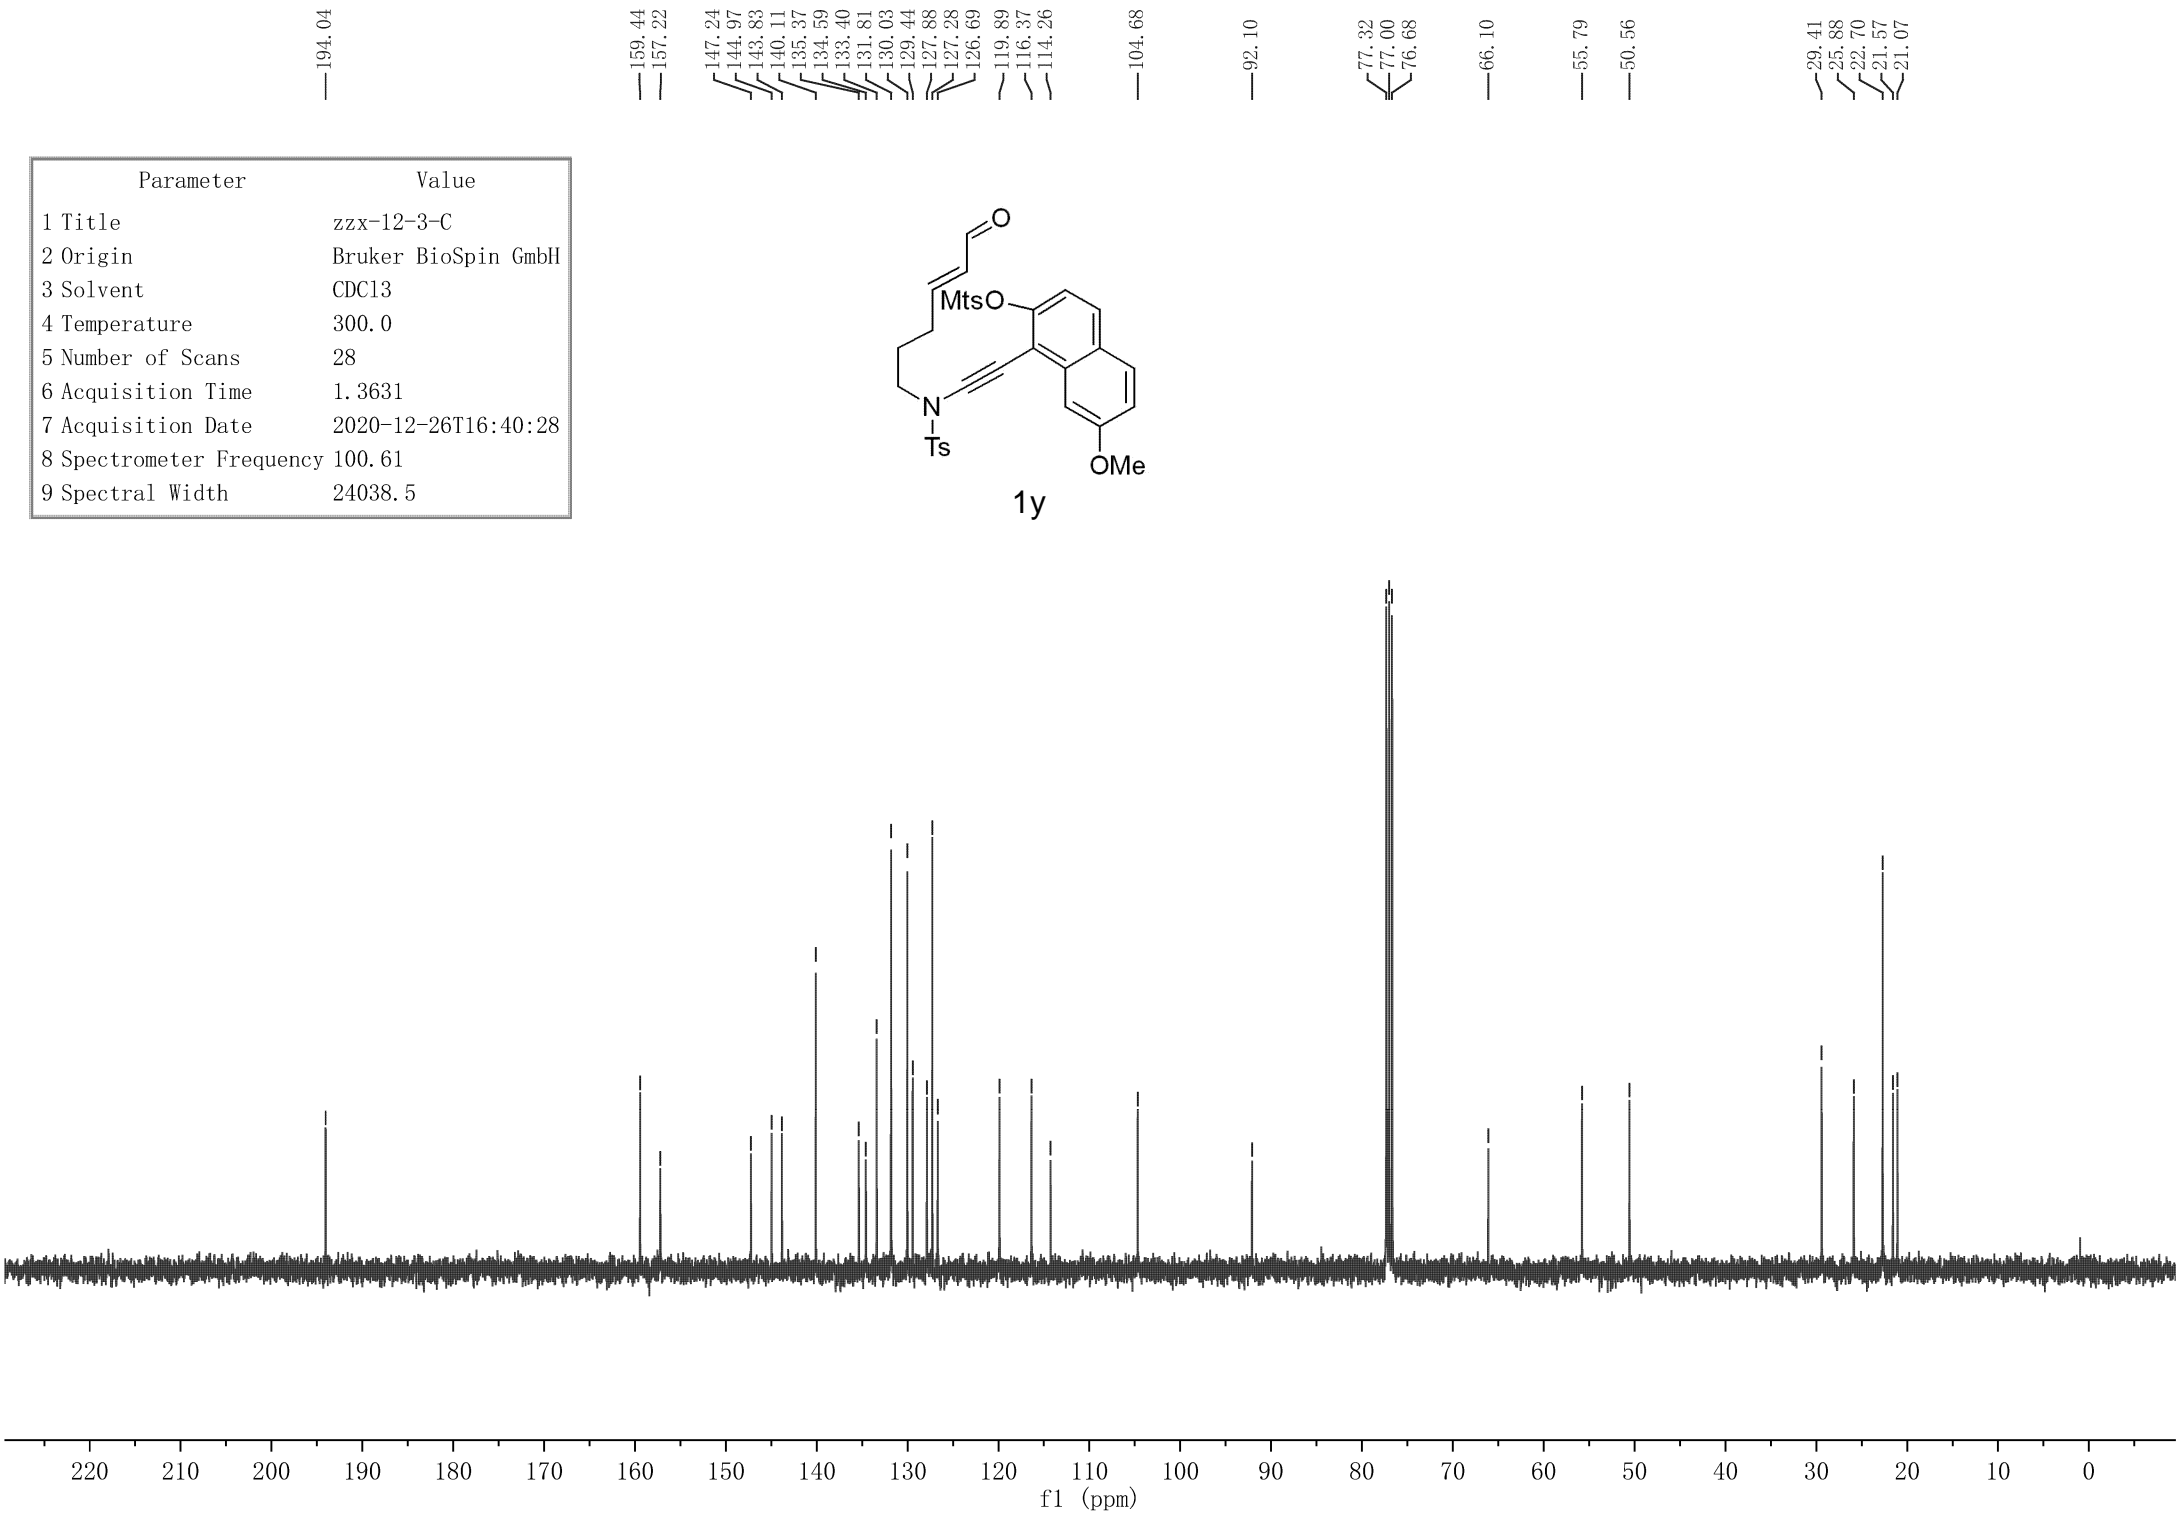

9.500  
9.480

7.880  
7.859

7.368  
7.348  
6.980  
6.939  
6.922  
6.883  
6.866  
6.750  
6.729  
6.169  
6.148  
6.133  
6.113  
6.094

3.525  
3.508  
3.491  
2.849  
2.834  
2.818  
2.676  
2.661  
2.646  
2.537  
2.468  
2.447  
2.332  
2.071  
2.052  
2.039  
2.034  
1.839  
1.797  
1.737  
1.724

0.000

| Parameter                | Value               |
|--------------------------|---------------------|
| 1 Title                  | zzx-12-2-H          |
| 2 Origin                 | Bruker BioSpin GmbH |
| 3 Solvent                | CDC13               |
| 4 Temperature            | 298.0               |
| 5 Number of Scans        | 9                   |
| 6 Acquisition Time       | 4.0894              |
| 7 Acquisition Date       | 2020-12-26T16:31:28 |
| 8 Spectrometer Frequency | 400.13              |
| 9 Spectral Width         | 8012.8              |

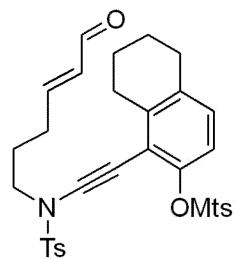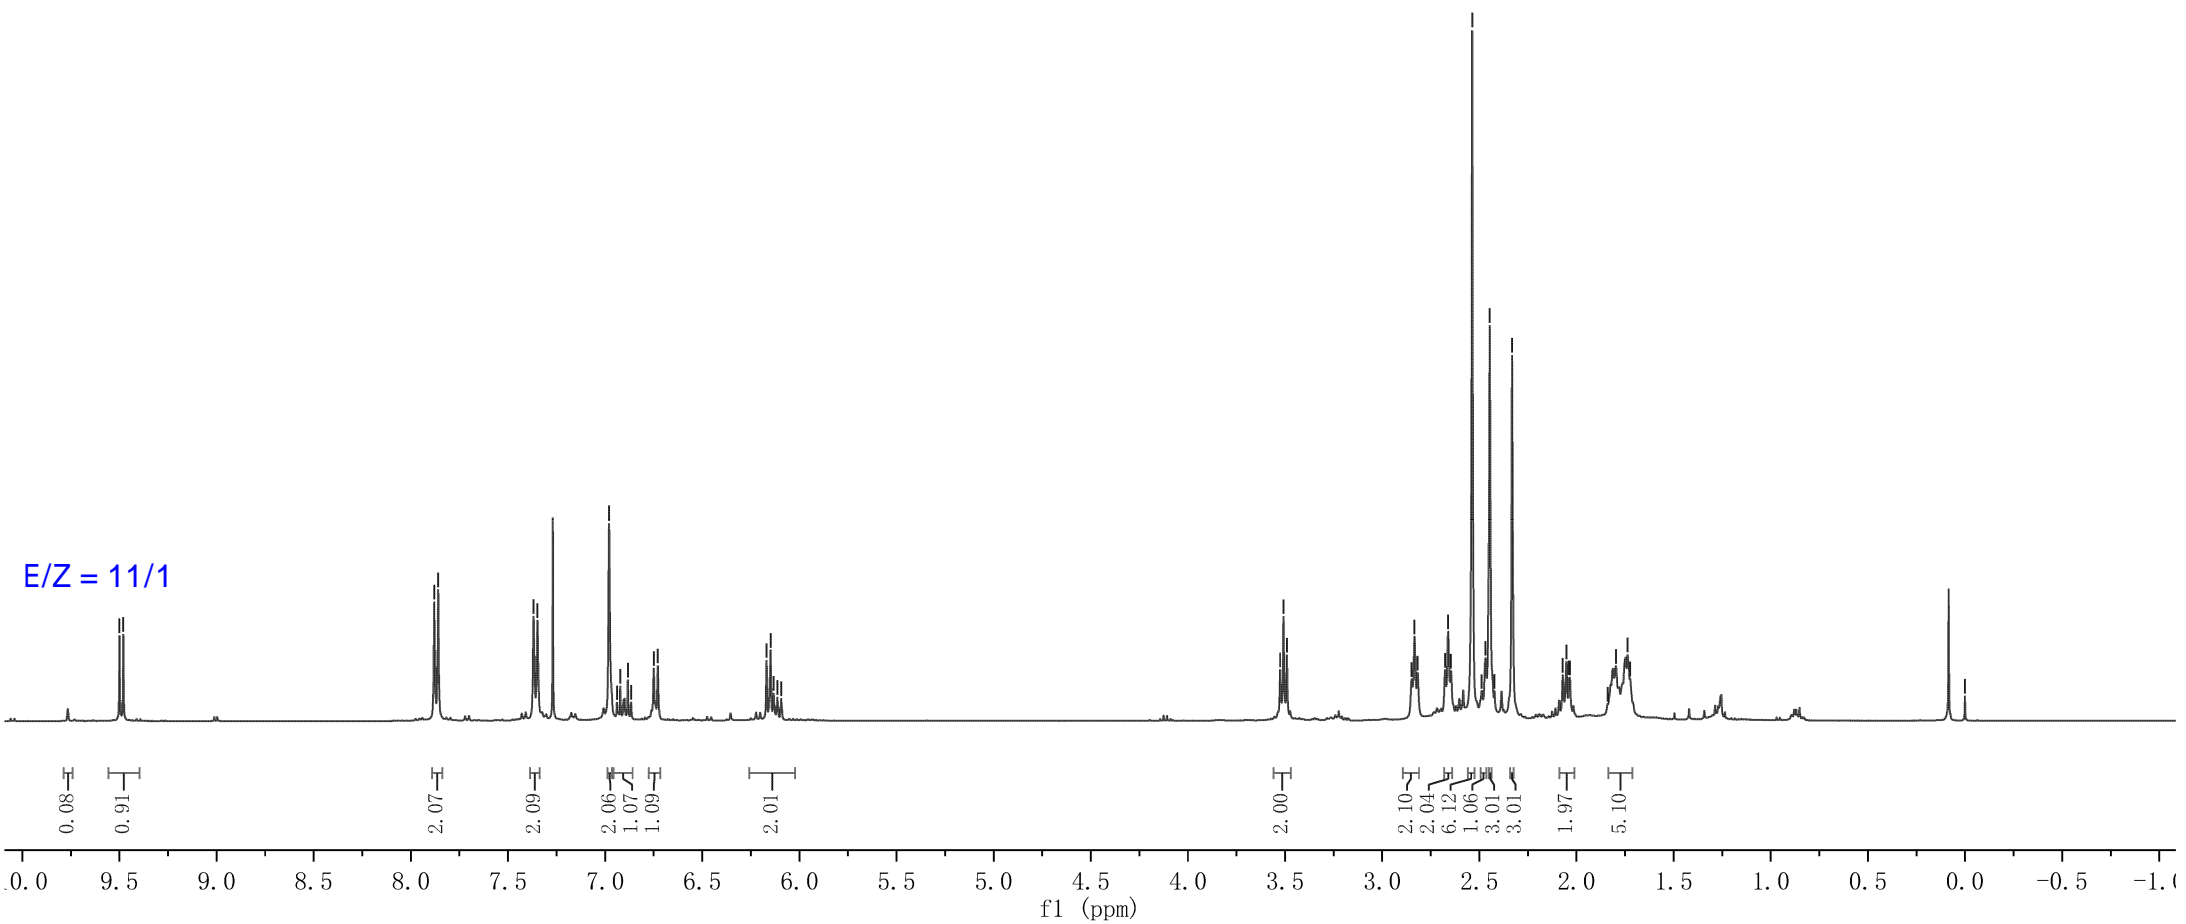

| Parameter                | Value               |
|--------------------------|---------------------|
| 1 Title                  | zzx-12-2-C          |
| 2 Origin                 | Bruker BioSpin GmbH |
| 3 Solvent                | CDC13               |
| 4 Temperature            | 300.0               |
| 5 Number of Scans        | 40                  |
| 6 Acquisition Time       | 1.3631              |
| 7 Acquisition Date       | 2020-12-26T16:34:21 |
| 8 Spectrometer Frequency | 100.61              |
| 9 Spectral Width         | 24038.5             |

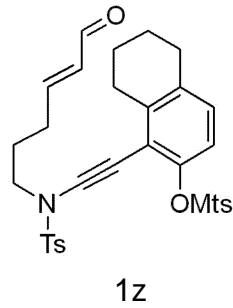

— 194.03

— 157.36  
 147.17  
 144.75  
 143.60  
 140.40  
 139.95  
 135.90  
 134.61  
 133.28  
 131.91  
 131.71  
 129.85  
 128.39  
 127.51  
 118.05  
 117.06

— 91.52

77.32  
 77.00  
 76.68  
 65.44  
 51.03  
 29.35  
 29.22  
 28.37  
 25.98  
 22.62  
 22.54  
 22.40  
 21.56  
 21.02  
 147.17  
 144.75  
 143.60  
 140.40  
 139.95  
 135.90  
 134.61  
 133.28  
 131.91  
 131.71  
 129.85  
 128.39  
 127.51

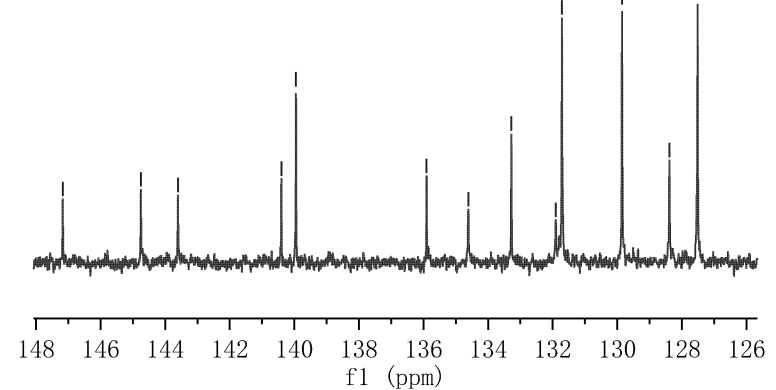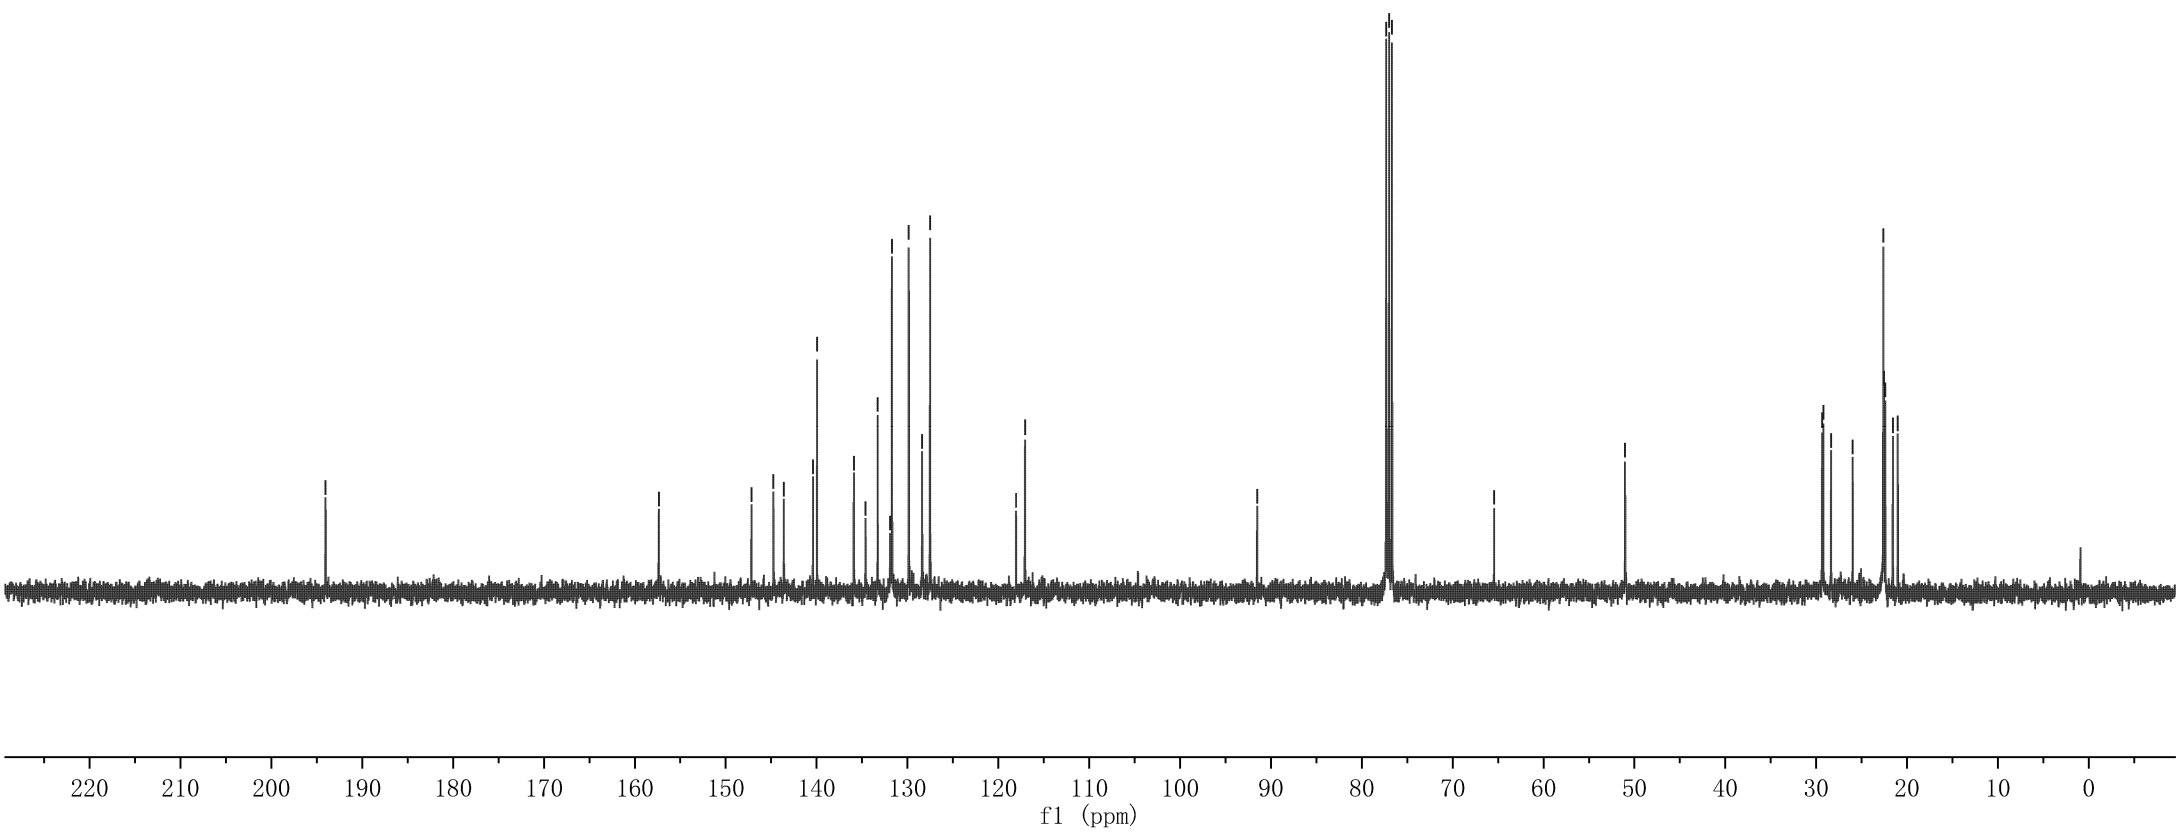

9.512  
9.492

8.414  
8.393

7.930  
7.908  
7.867  
7.835  
7.812  
7.601  
7.574  
7.553  
7.329  
7.307  
6.883  
6.866  
6.827  
6.810

6.167  
6.147  
6.128  
6.108

3.606  
3.589  
3.571

2.509  
2.491  
2.474  
2.456  
2.088  
2.070  
2.052  
2.034  
2.016

1.328

0.000

| Parameter                | Value               |
|--------------------------|---------------------|
| 1 Title                  | zzx-14-127-H        |
| 2 Origin                 | Bruker BioSpin GmbH |
| 3 Solvent                | CDCl3               |
| 4 Temperature            | 298.0               |
| 5 Number of Scans        | 7                   |
| 6 Acquisition Time       | 4.0894              |
| 7 Acquisition Date       | 2021-10-04T17:01:47 |
| 8 Spectrometer Frequency | 400.13              |
| 9 Spectral Width         | 8012.8              |

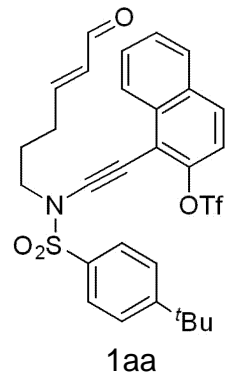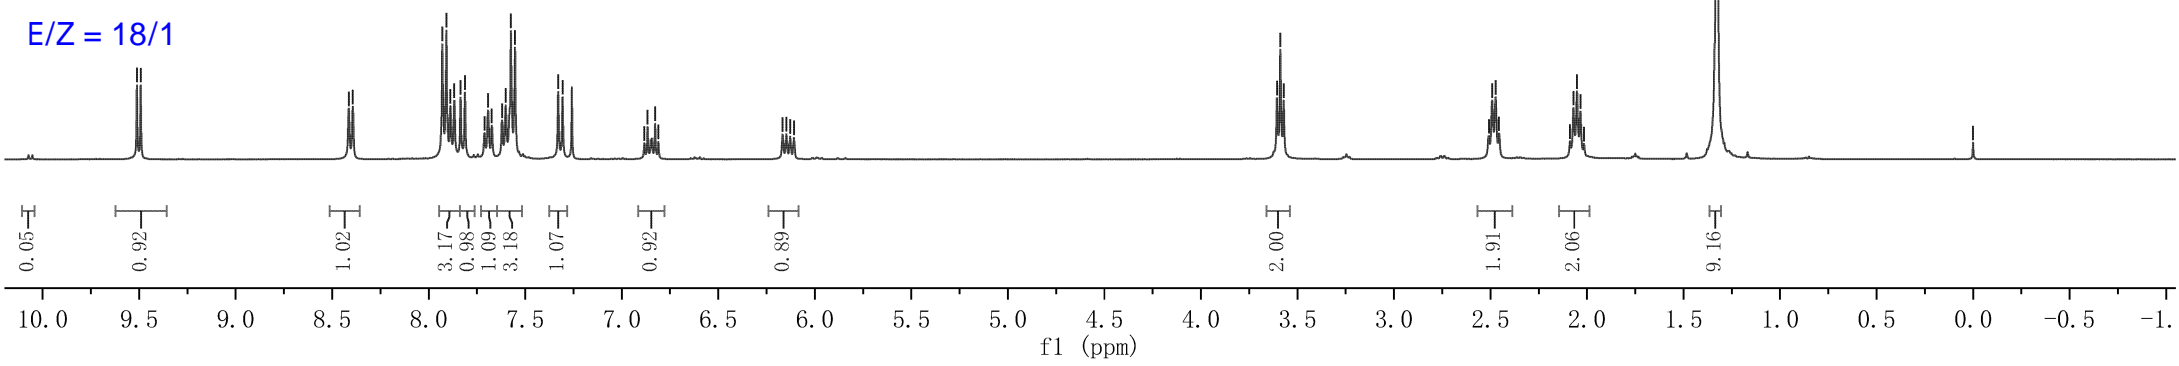

| Parameter                | Value               |
|--------------------------|---------------------|
| 1 Title                  | zzx-14-127-C        |
| 2 Origin                 | Bruker BioSpin GmbH |
| 3 Solvent                | CDC13               |
| 4 Temperature            | 300.0               |
| 5 Number of Scans        | 23                  |
| 6 Acquisition Time       | 1.3631              |
| 7 Acquisition Date       | 2021-10-04T17:03:37 |
| 8 Spectrometer Frequency | 100.61              |
| 9 Spectral Width         | 24038.5             |

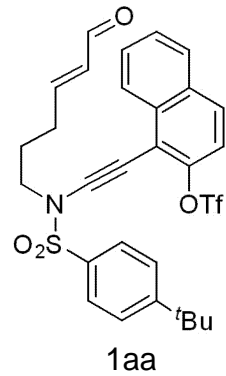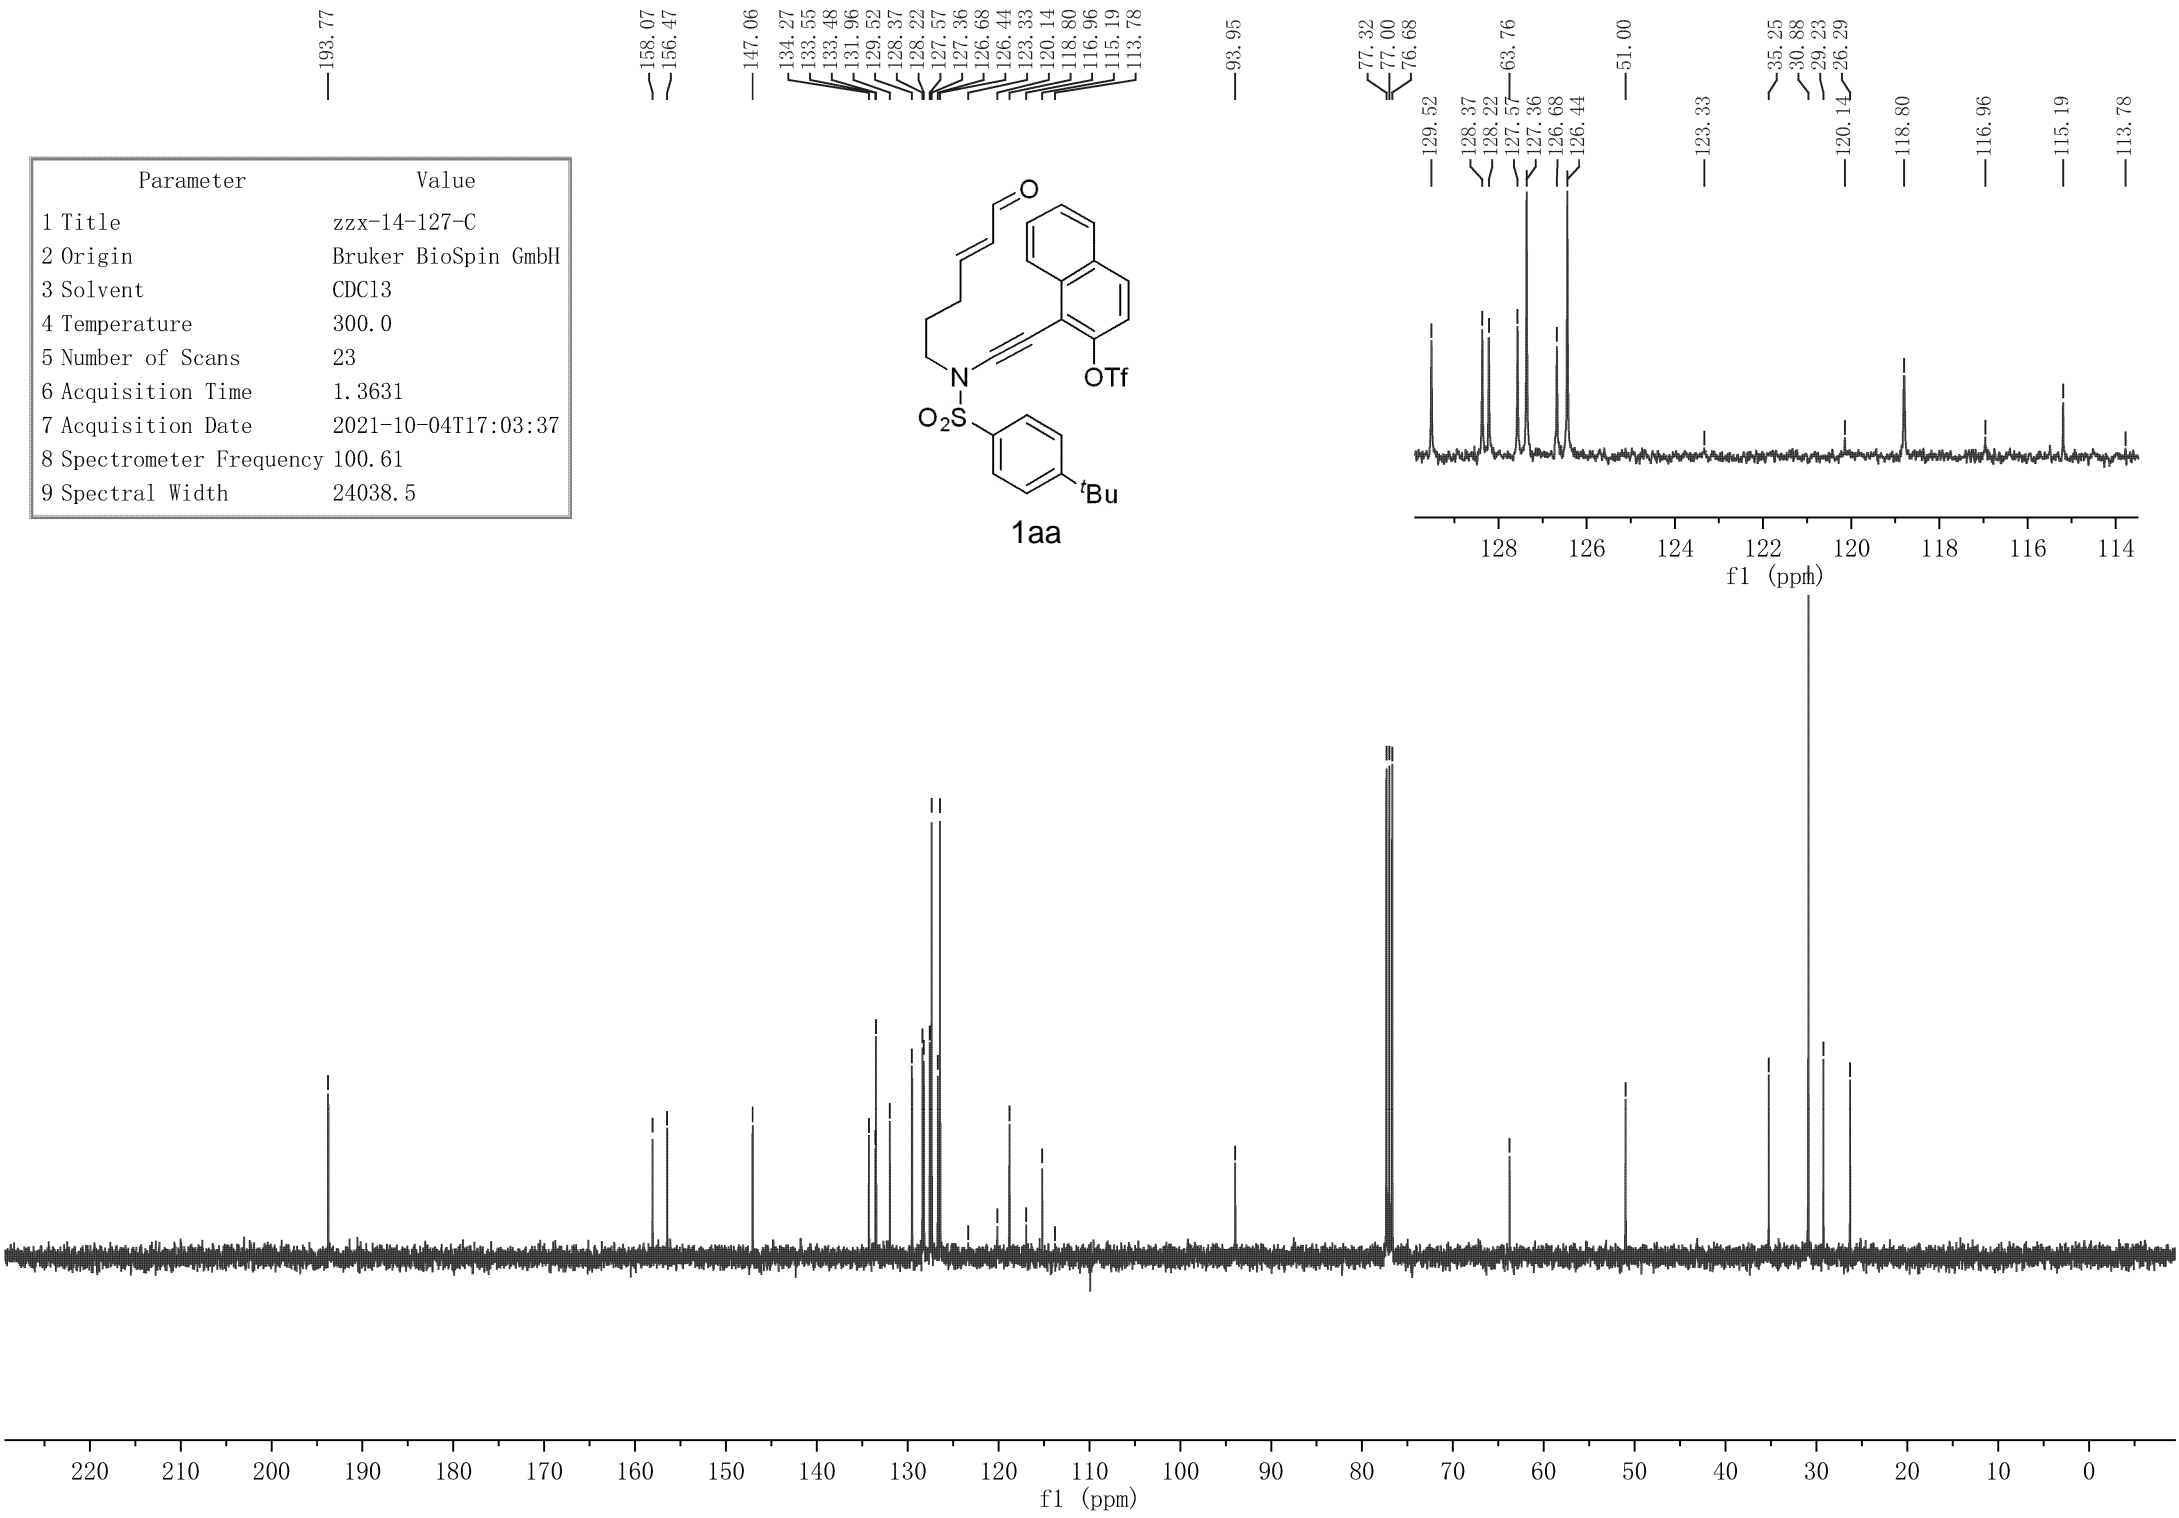

—73.72

| Parameter                | Value               |
|--------------------------|---------------------|
| 1 Title                  | zzx-14-127-F        |
| 2 Origin                 | Bruker BioSpin GmbH |
| 3 Solvent                | CDCl3               |
| 4 Temperature            | 301.2               |
| 5 Number of Scans        | 16                  |
| 6 Acquisition Time       | 0.5767              |
| 7 Acquisition Date       | 2021-10-05T15:26:00 |
| 8 Spectrometer Frequency | 470.63              |
| 9 Spectral Width         | 113636.4            |

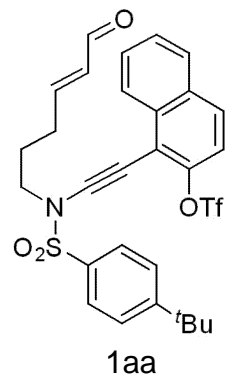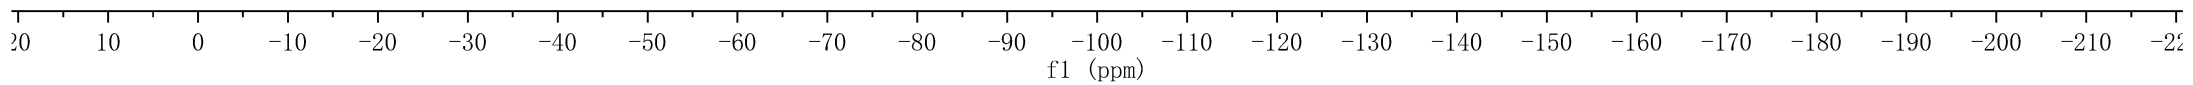

9.518  
9.499

8.388  
8.366  
8.326  
8.305  
8.184  
8.162

7.911  
7.892  
7.870  
7.707  
7.623  
7.533  
7.311

6.890  
6.873  
6.834  
6.817

6.191  
6.172  
6.152  
6.132

| Parameter                | Value               |
|--------------------------|---------------------|
| 1 Title                  | zzx-14-182-H        |
| 2 Origin                 | Bruker BioSpin GmbH |
| 3 Solvent                | CDCl3               |
| 4 Temperature            | 298.0               |
| 5 Number of Scans        | 5                   |
| 6 Acquisition Time       | 4.0894              |
| 7 Acquisition Date       | 2021-11-04T16:40:45 |
| 8 Spectrometer Frequency | 400.13              |
| 9 Spectral Width         | 8012.8              |

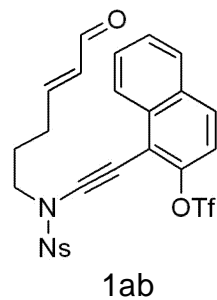

3.653  
3.636  
3.618

2.543  
2.525  
2.508  
2.491

2.123  
2.105  
2.087  
2.069  
2.051

— 0.000

E/Z > 20/1

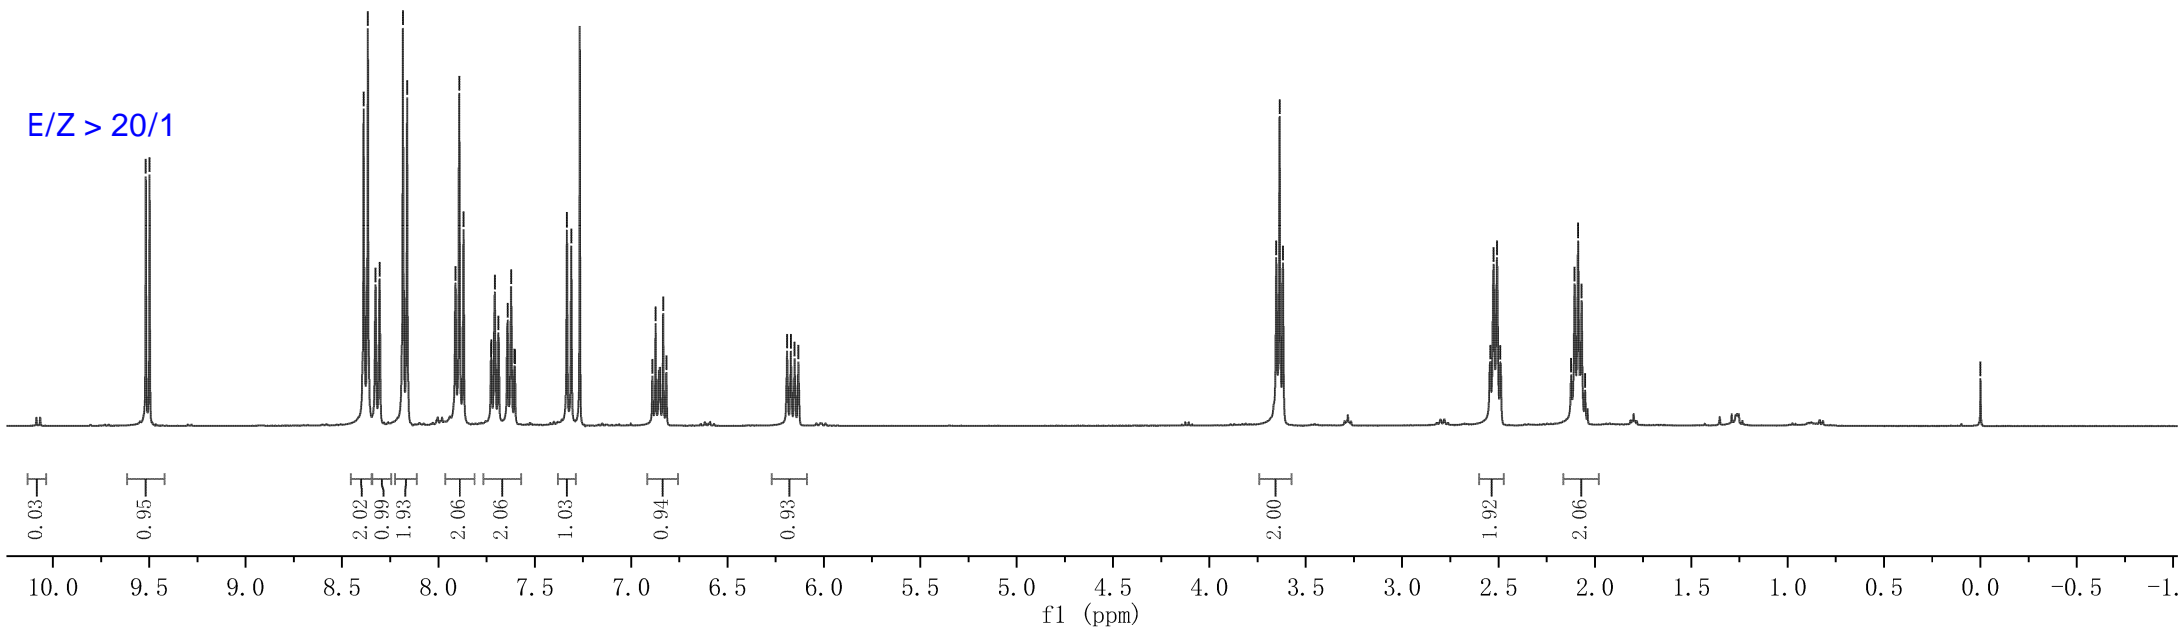



| Parameter                | Value               |
|--------------------------|---------------------|
| 1 Title                  | zzx-14-182-C        |
| 2 Origin                 | Bruker BioSpin GmbH |
| 3 Solvent                | CDC13               |
| 4 Temperature            | 300.0               |
| 5 Number of Scans        | 21                  |
| 6 Acquisition Time       | 1.3631              |
| 7 Acquisition Date       | 2021-11-04T16:42:05 |
| 8 Spectrometer Frequency | 100.61              |
| 9 Spectral Width         | 24038.5             |

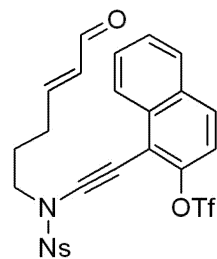

1ab

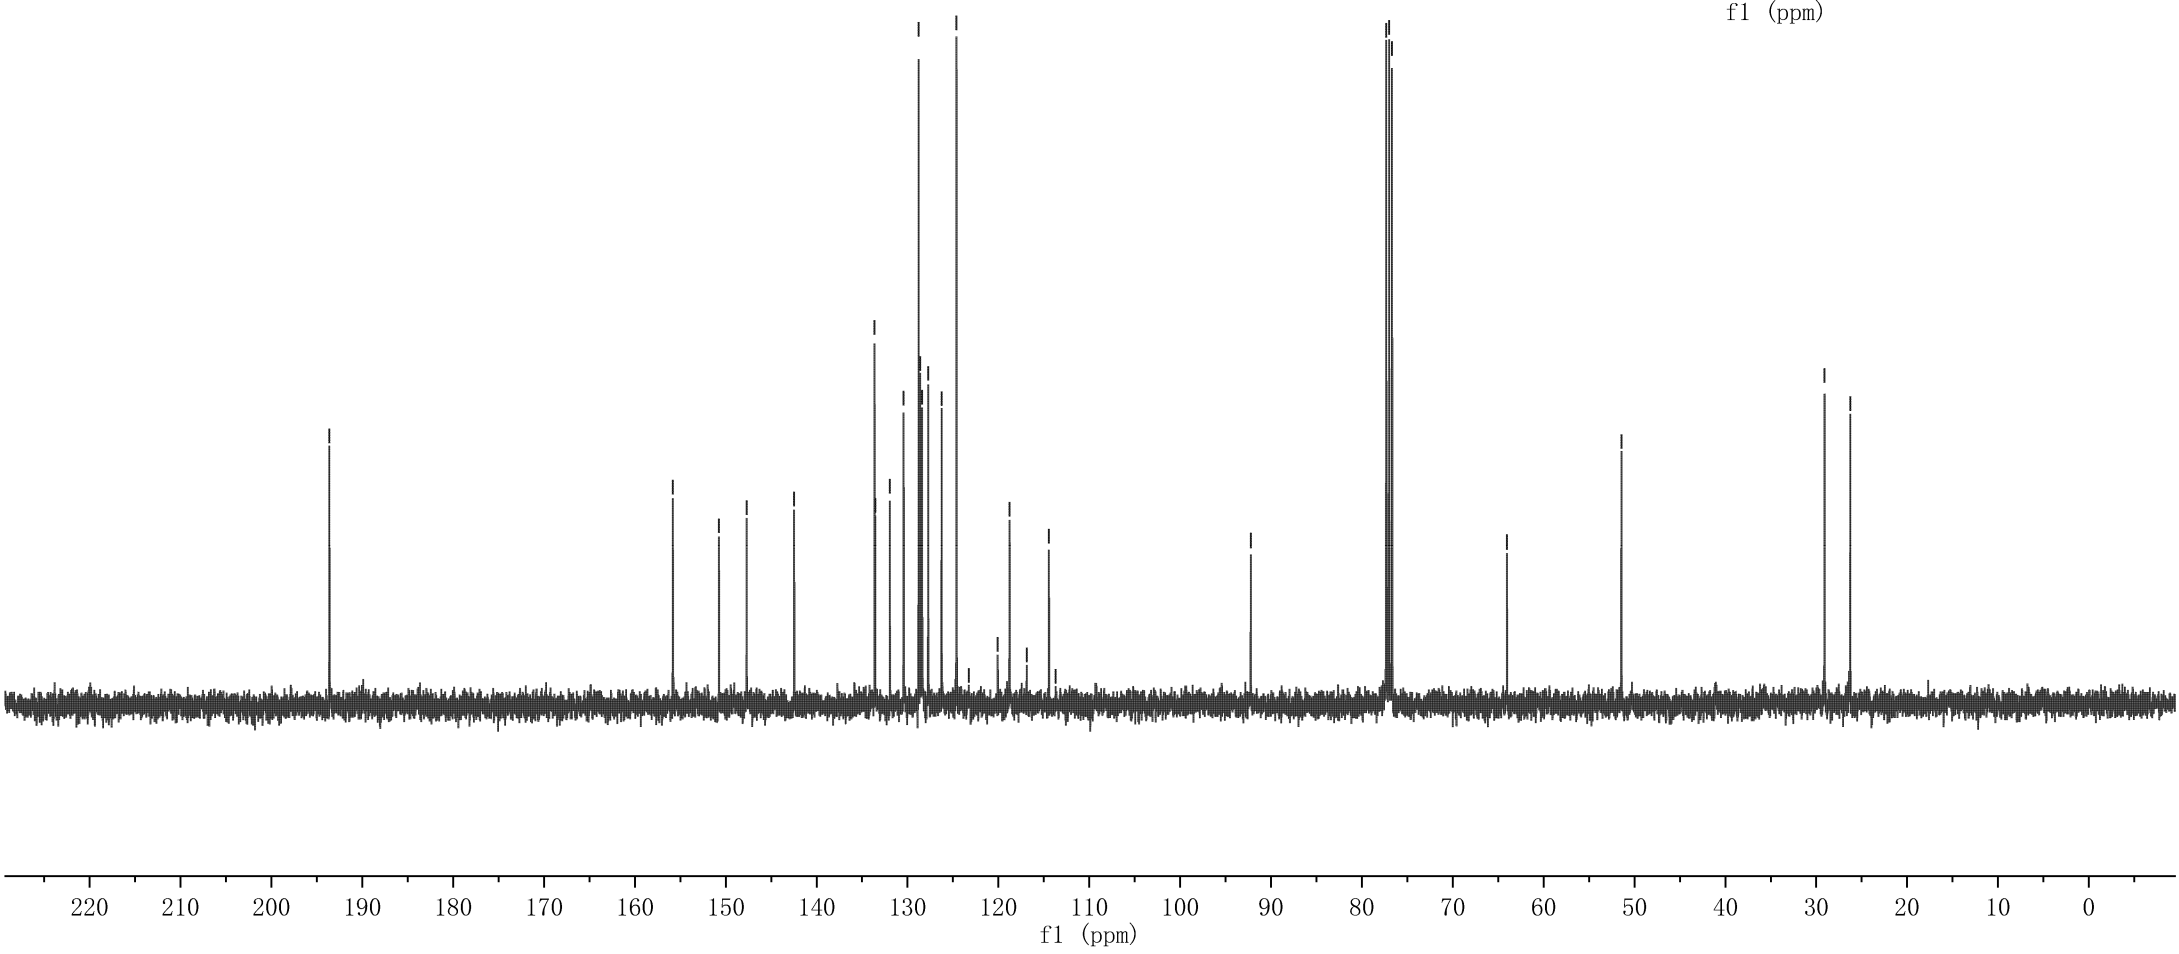

— 193.62  
 — 155.82 — 150.75 — 147.70 — 142.47 — 133.63 — 133.55 — 131.95 — 130.43 — 128.78 — 128.62 — 128.40 — 127.72 — 126.25 — 124.61 — 123.26 — 120.07 — 118.77 — 116.89 — 114.43 — 113.70  
 — 92.23  
 — 77.32 — 77.00 — 76.68 — 128.78 — 128.62 — 128.40 — 127.72 — 64.03 — 126.25 — 124.61 — 51.44 — 123.26 — 120.07 — 29.08 — 26.25 — 118.77 — 116.89 — 114.43 — 113.70

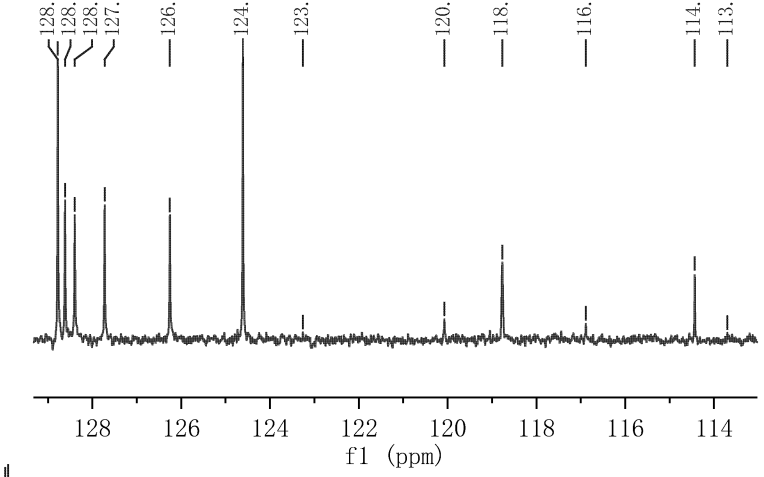

—73.93

| Parameter                | Value               |
|--------------------------|---------------------|
| 1 Title                  | ZZX-18-S-OTf-4-Ns   |
| 2 Origin                 |                     |
| 3 Solvent                | CDC13               |
| 4 Temperature            | 297.5               |
| 5 Number of Scans        | 16                  |
| 6 Acquisition Time       | 1.0000              |
| 7 Acquisition Date       | 2023-02-09T11:11:17 |
| 8 Spectrometer Frequency | 376.28              |
| 9 Spectral Width         | 96153.0             |

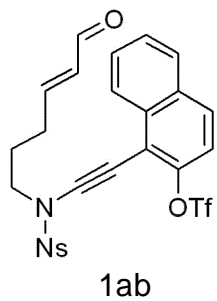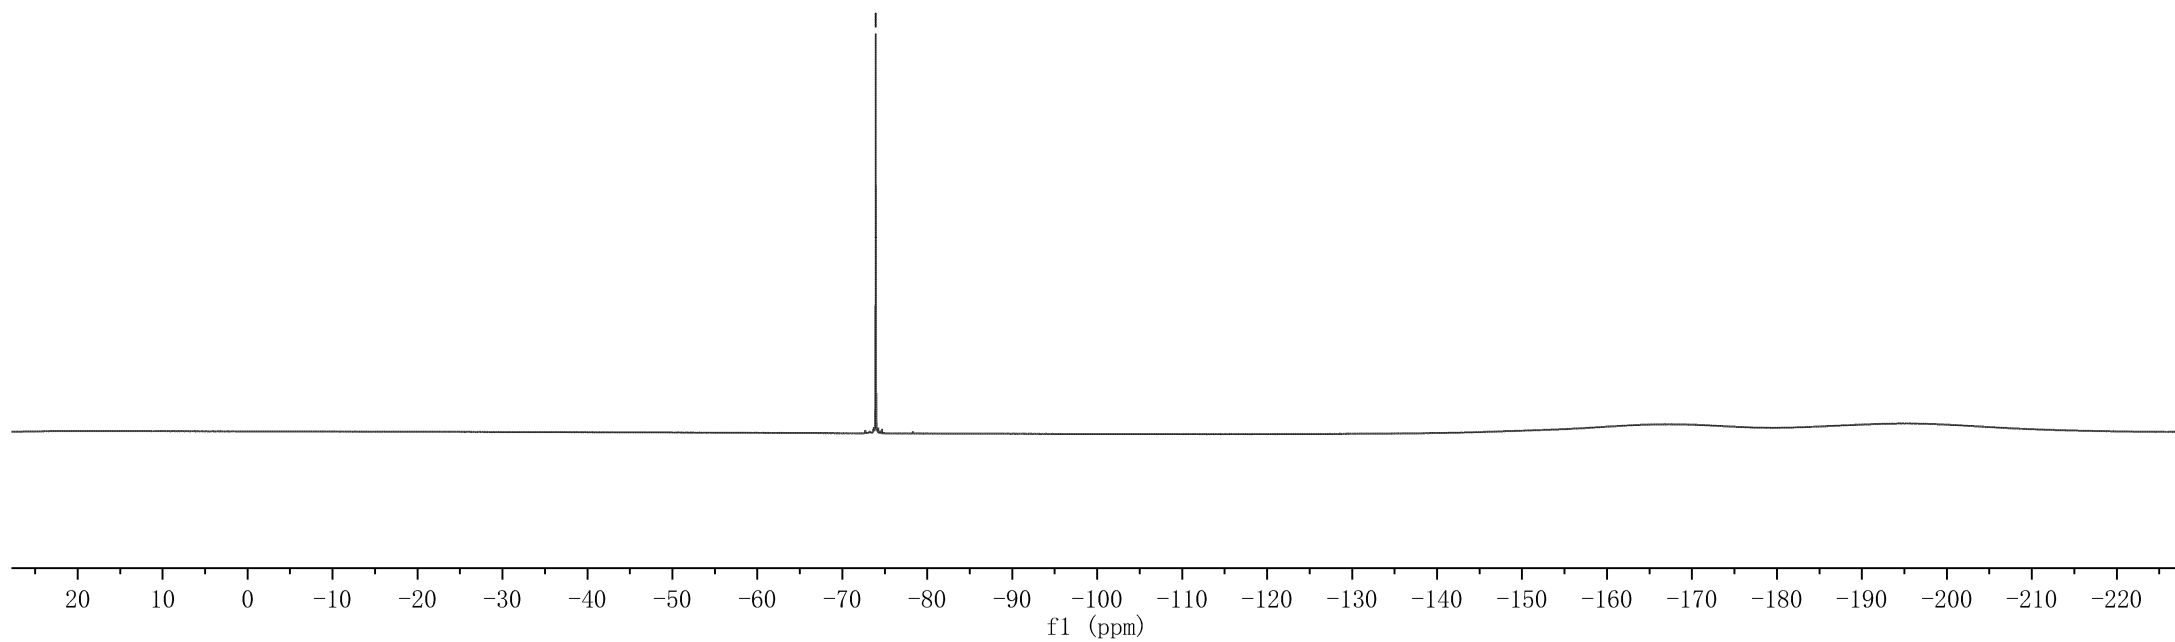

9.504  
9.485

7.836  
7.816  
7.793  
7.706  
7.687  
7.412  
7.350  
7.330  
7.276  
6.863  
6.844  
6.824  
6.807  
6.162  
6.142  
6.123  
6.104

3.592  
3.575  
3.558  
3.151  
2.500  
2.483  
2.465  
2.433  
2.037  
2.020  
2.002

0.000

| Parameter                | Value               |
|--------------------------|---------------------|
| 1 Title                  | zzx-12-224          |
| 2 Origin                 | Bruker BioSpin GmbH |
| 3 Solvent                | CDC13               |
| 4 Temperature            | 298.0               |
| 5 Number of Scans        | 5                   |
| 6 Acquisition Time       | 4.0894              |
| 7 Acquisition Date       | 2021-03-26T20:49:57 |
| 8 Spectrometer Frequency | 400.13              |
| 9 Spectral Width         | 8012.8              |

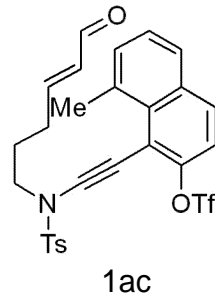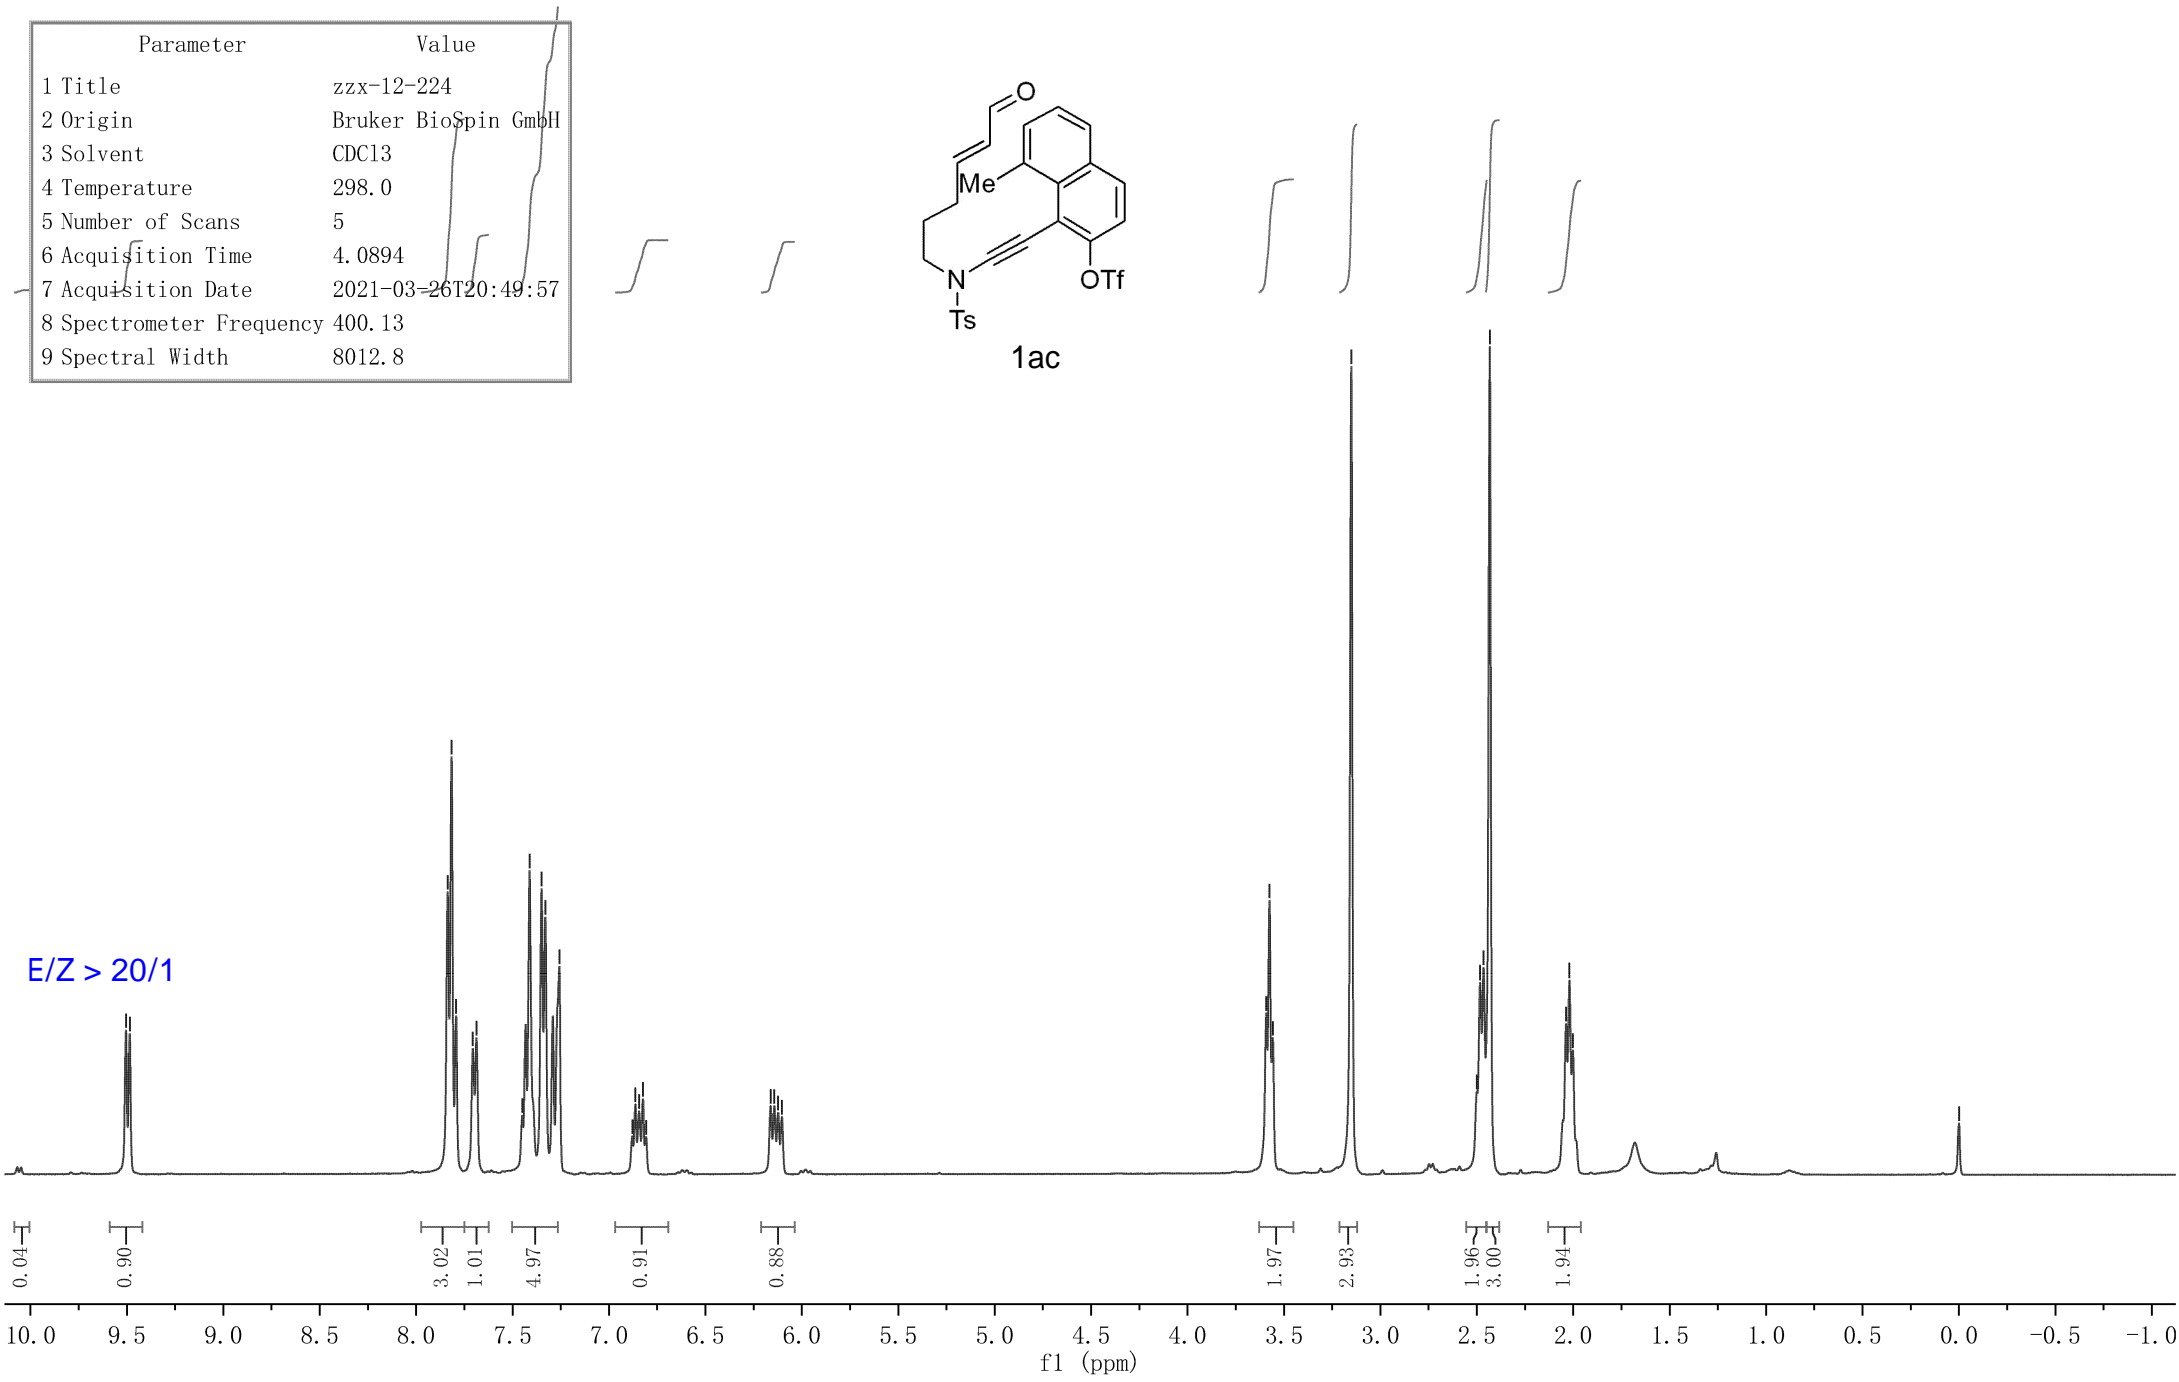

E/Z > 20/1

| Parameter                | Value               |
|--------------------------|---------------------|
| 1 Title                  | zzx-12-224-C        |
| 2 Origin                 | Bruker BioSpin GmbH |
| 3 Solvent                | CDC13               |
| 4 Temperature            | 300.0               |
| 5 Number of Scans        | 42                  |
| 6 Acquisition Time       | 1.3631              |
| 7 Acquisition Date       | 2021-03-26T20:51:39 |
| 8 Spectrometer Frequency | 100.61              |
| 9 Spectral Width         | 24038.5             |

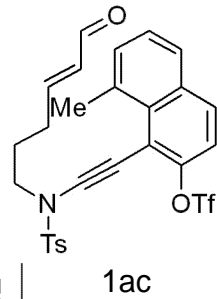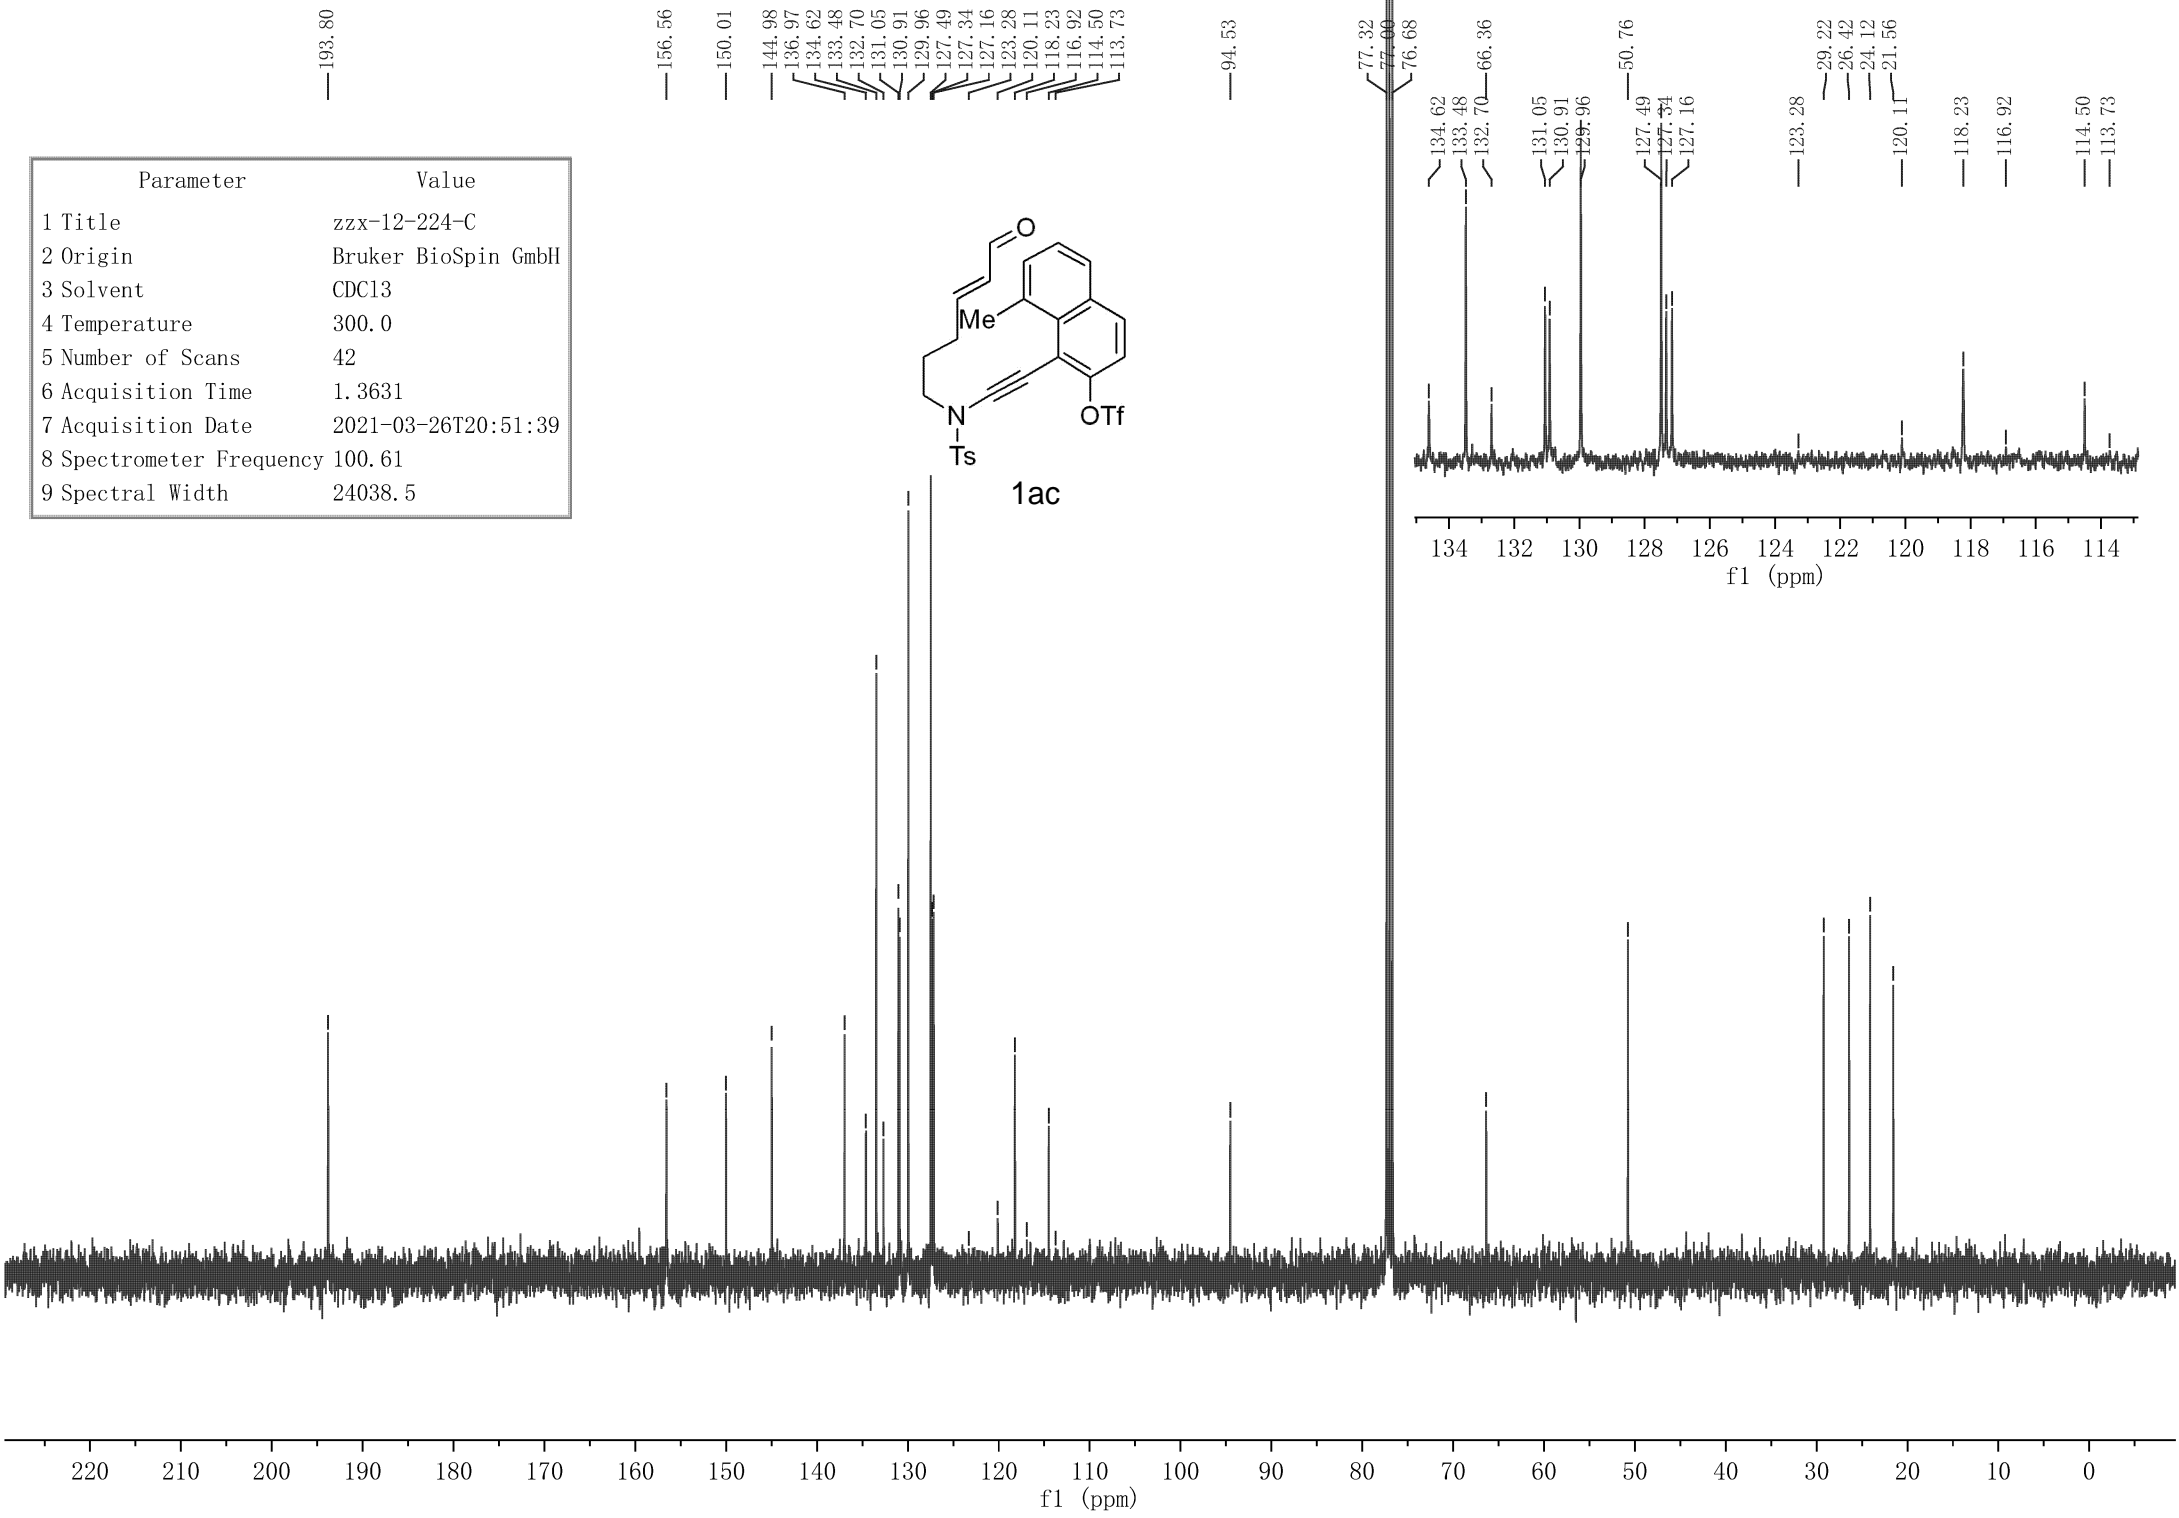

| Parameter                | Value               |
|--------------------------|---------------------|
| 1 Title                  | ZZX-18-S-OTf-8-Me   |
| 2 Origin                 |                     |
| 3 Solvent                | CDC13               |
| 4 Temperature            | 297.5               |
| 5 Number of Scans        | 16                  |
| 6 Acquisition Time       | 1.0000              |
| 7 Acquisition Date       | 2023-02-09T11:19:43 |
| 8 Spectrometer Frequency | 376.28              |
| 9 Spectral Width         | 96153.0             |

—73.90

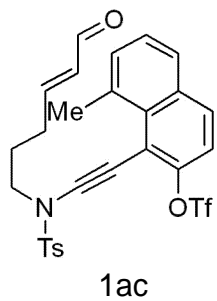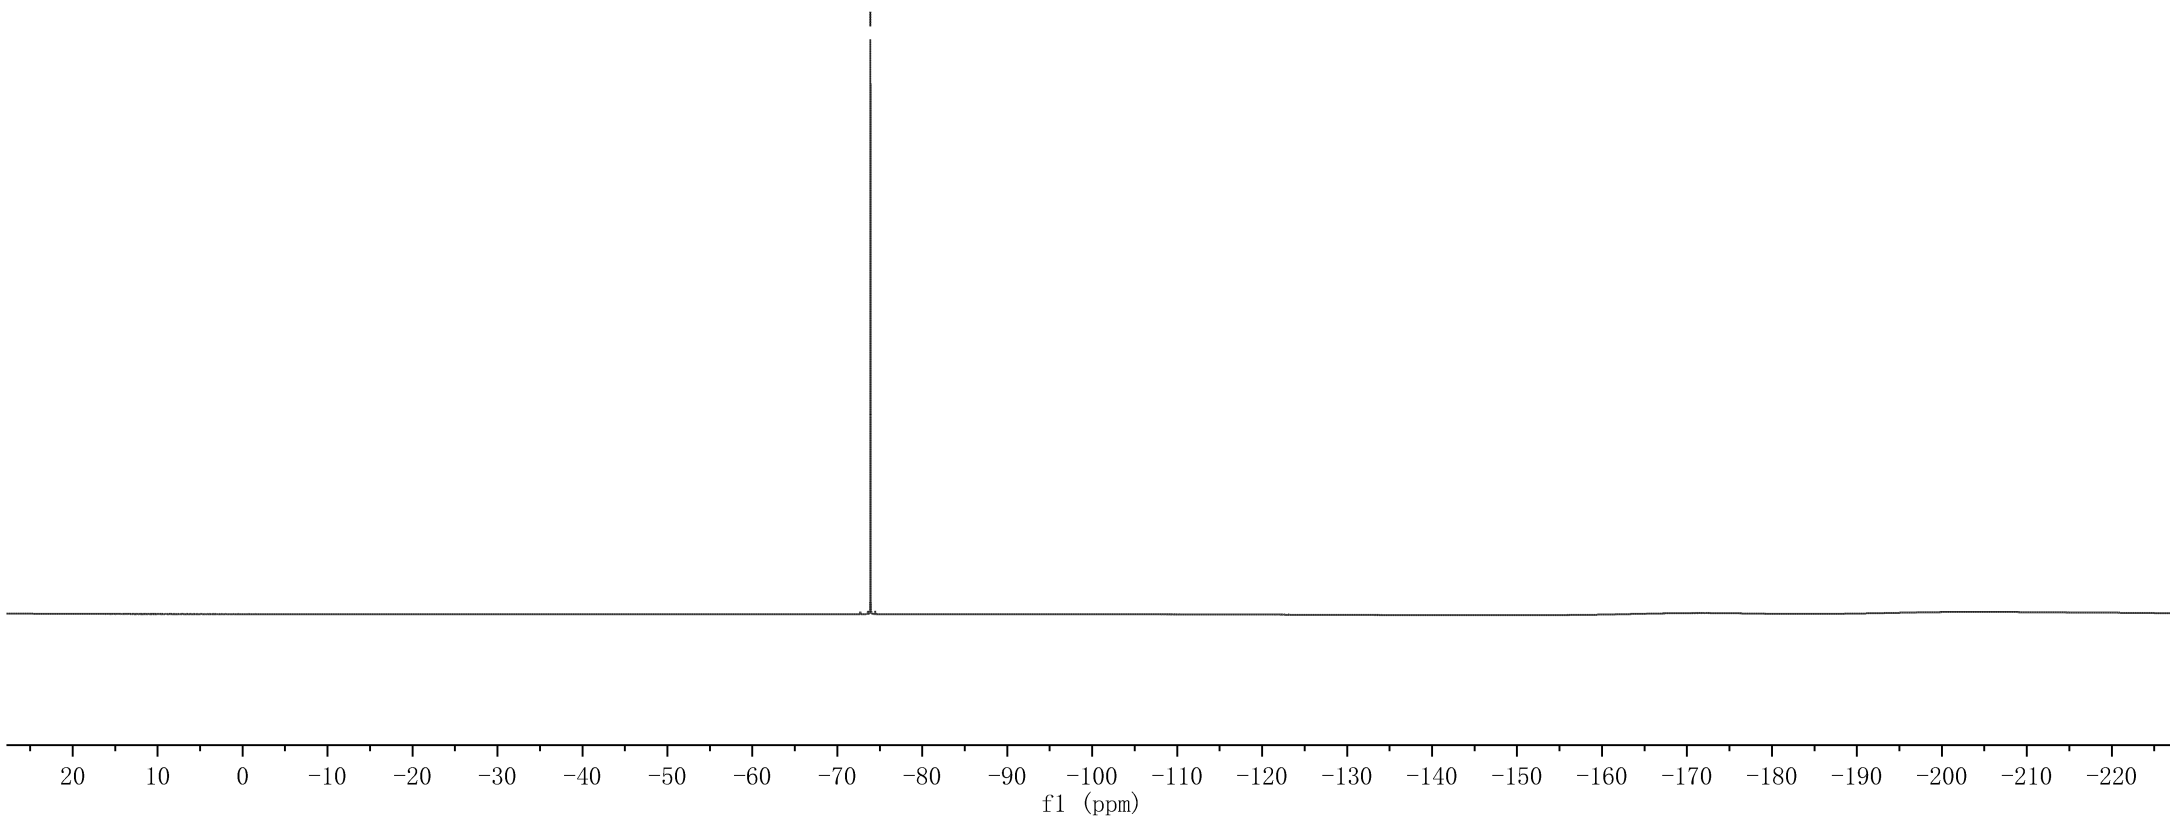

| Parameter                | Value               |
|--------------------------|---------------------|
| 1 Title                  | ZZX-14-67           |
| 2 Origin                 | Bruker BioSpin GmbH |
| 3 Solvent                | CDC13               |
| 4 Temperature            | 298.0               |
| 5 Number of Scans        | 7                   |
| 6 Acquisition Time       | 4.0894              |
| 7 Acquisition Date       | 2021-08-17T20:21:51 |
| 8 Spectrometer Frequency | 400.13              |
| 9 Spectral Width         | 8012.8              |

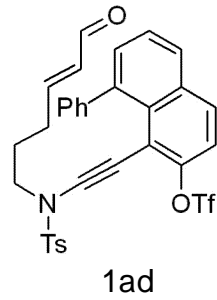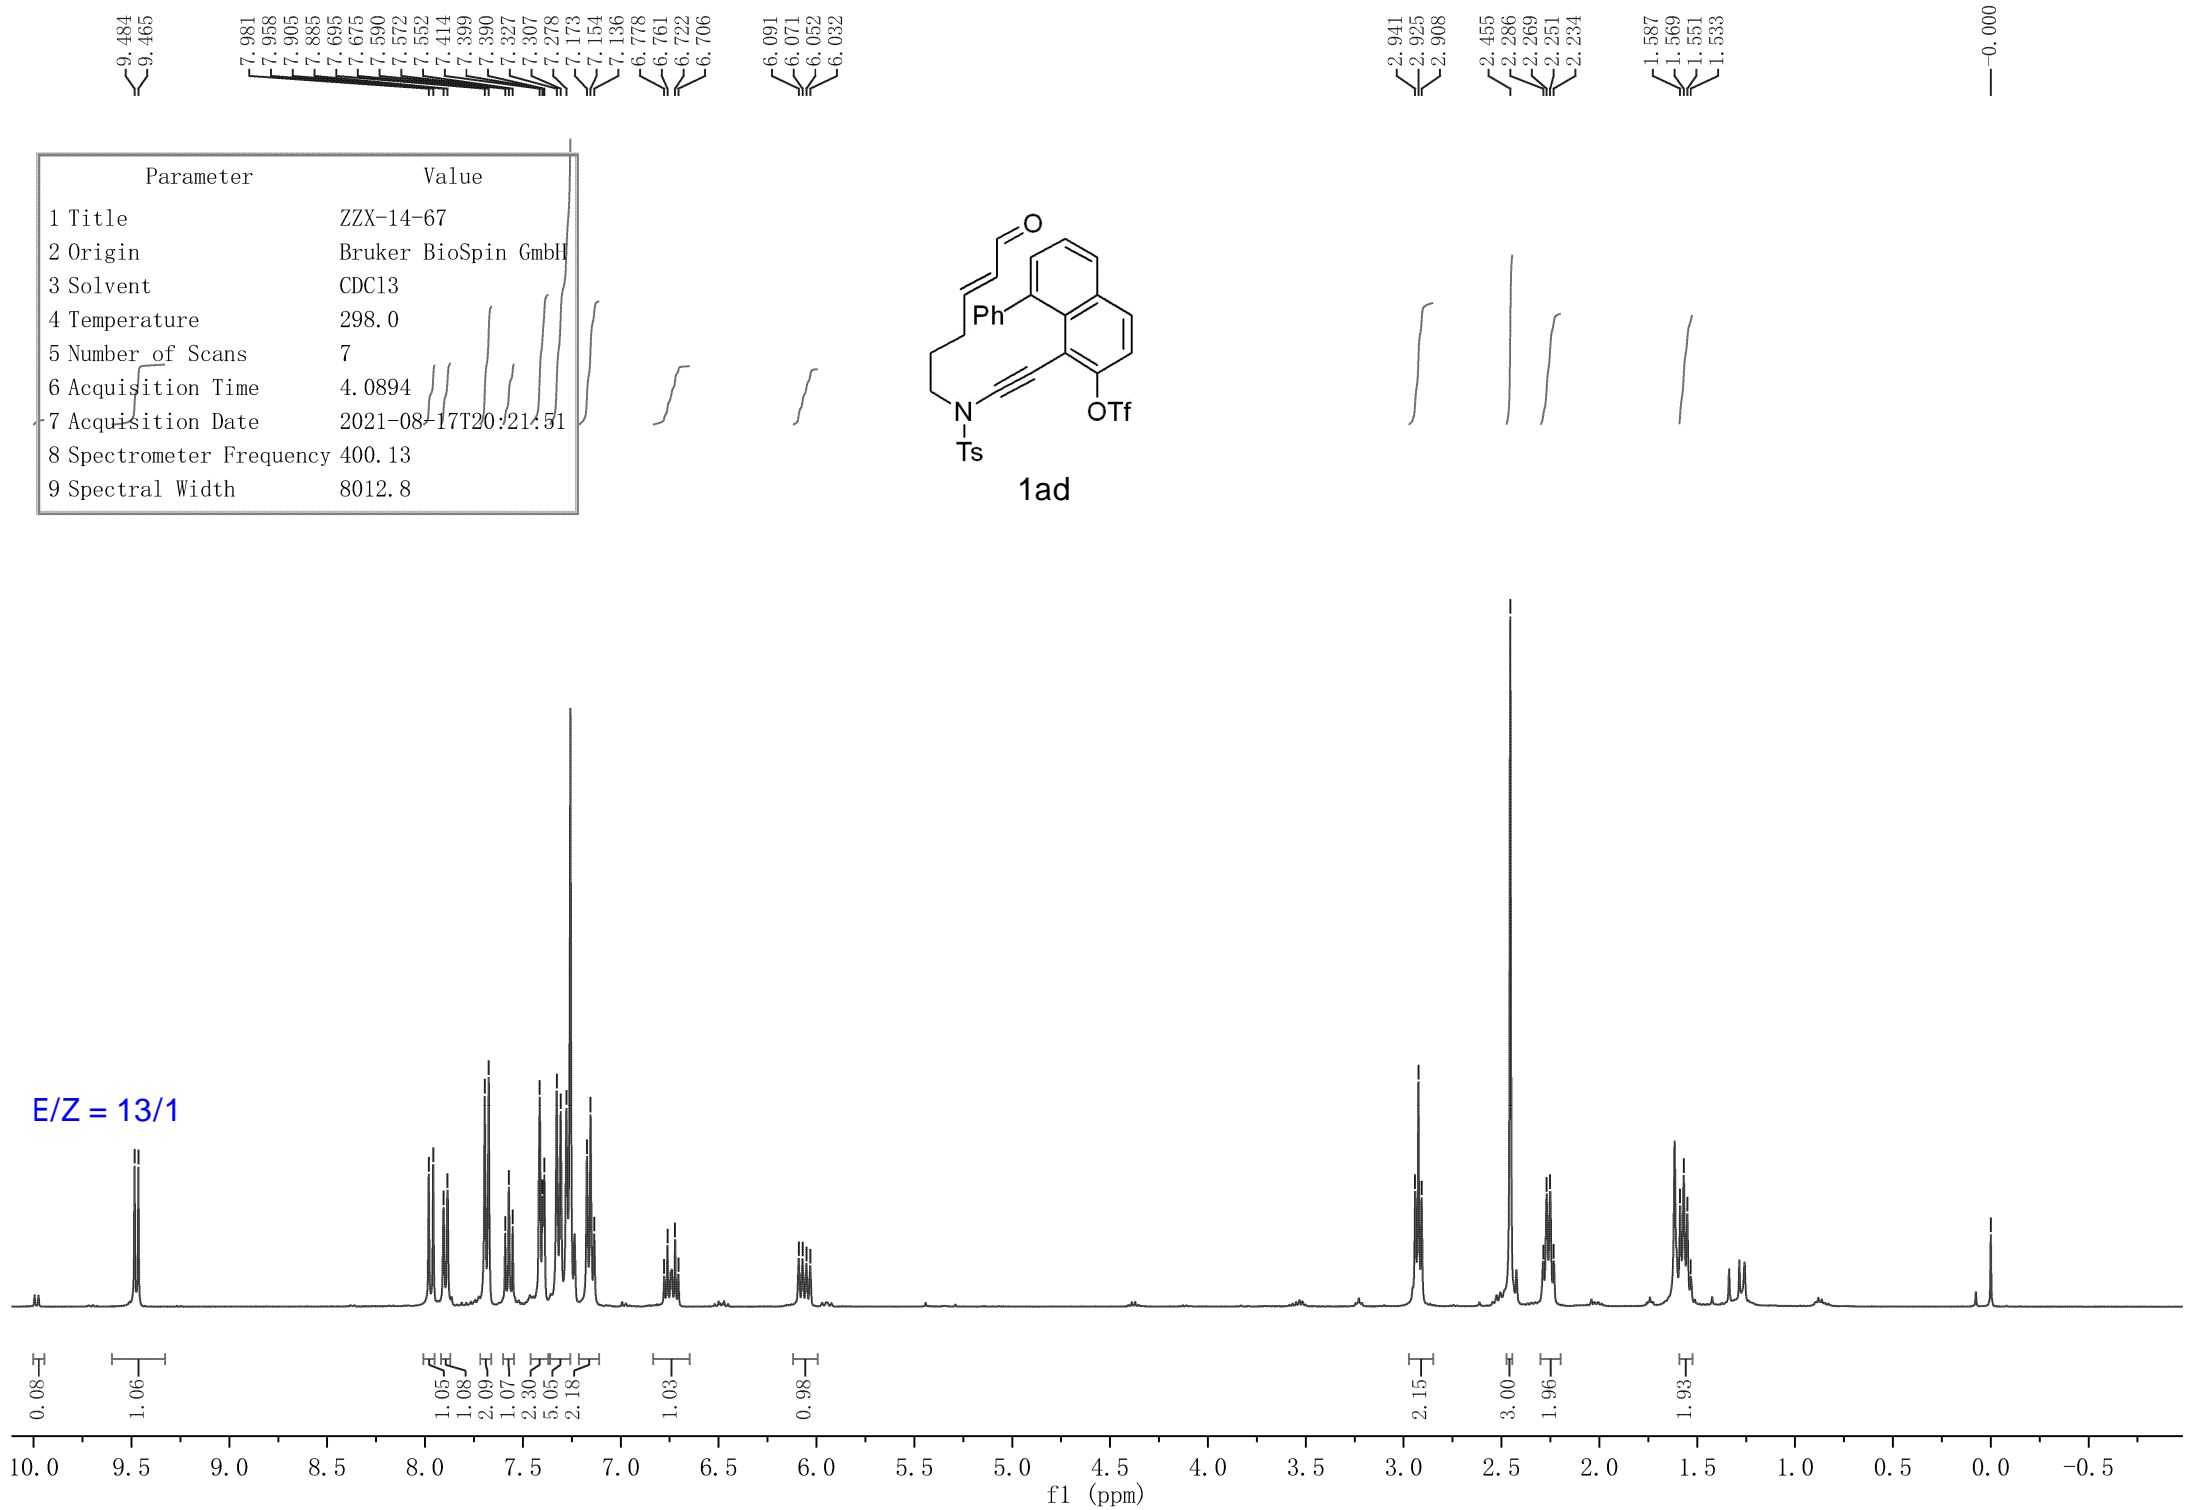

| Parameter                | Value               |
|--------------------------|---------------------|
| 1 Title                  | ZZX-14-67-C         |
| 2 Origin                 | Bruker BioSpin GmbH |
| 3 Solvent                | CDC13               |
| 4 Temperature            | 300.0               |
| 5 Number of Scans        | 81                  |
| 6 Acquisition Time       | 1.3631              |
| 7 Acquisition Date       | 2021-08-17T20:23:44 |
| 8 Spectrometer Frequency | 100.61              |
| 9 Spectral Width         | 24038.5             |

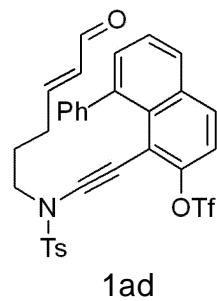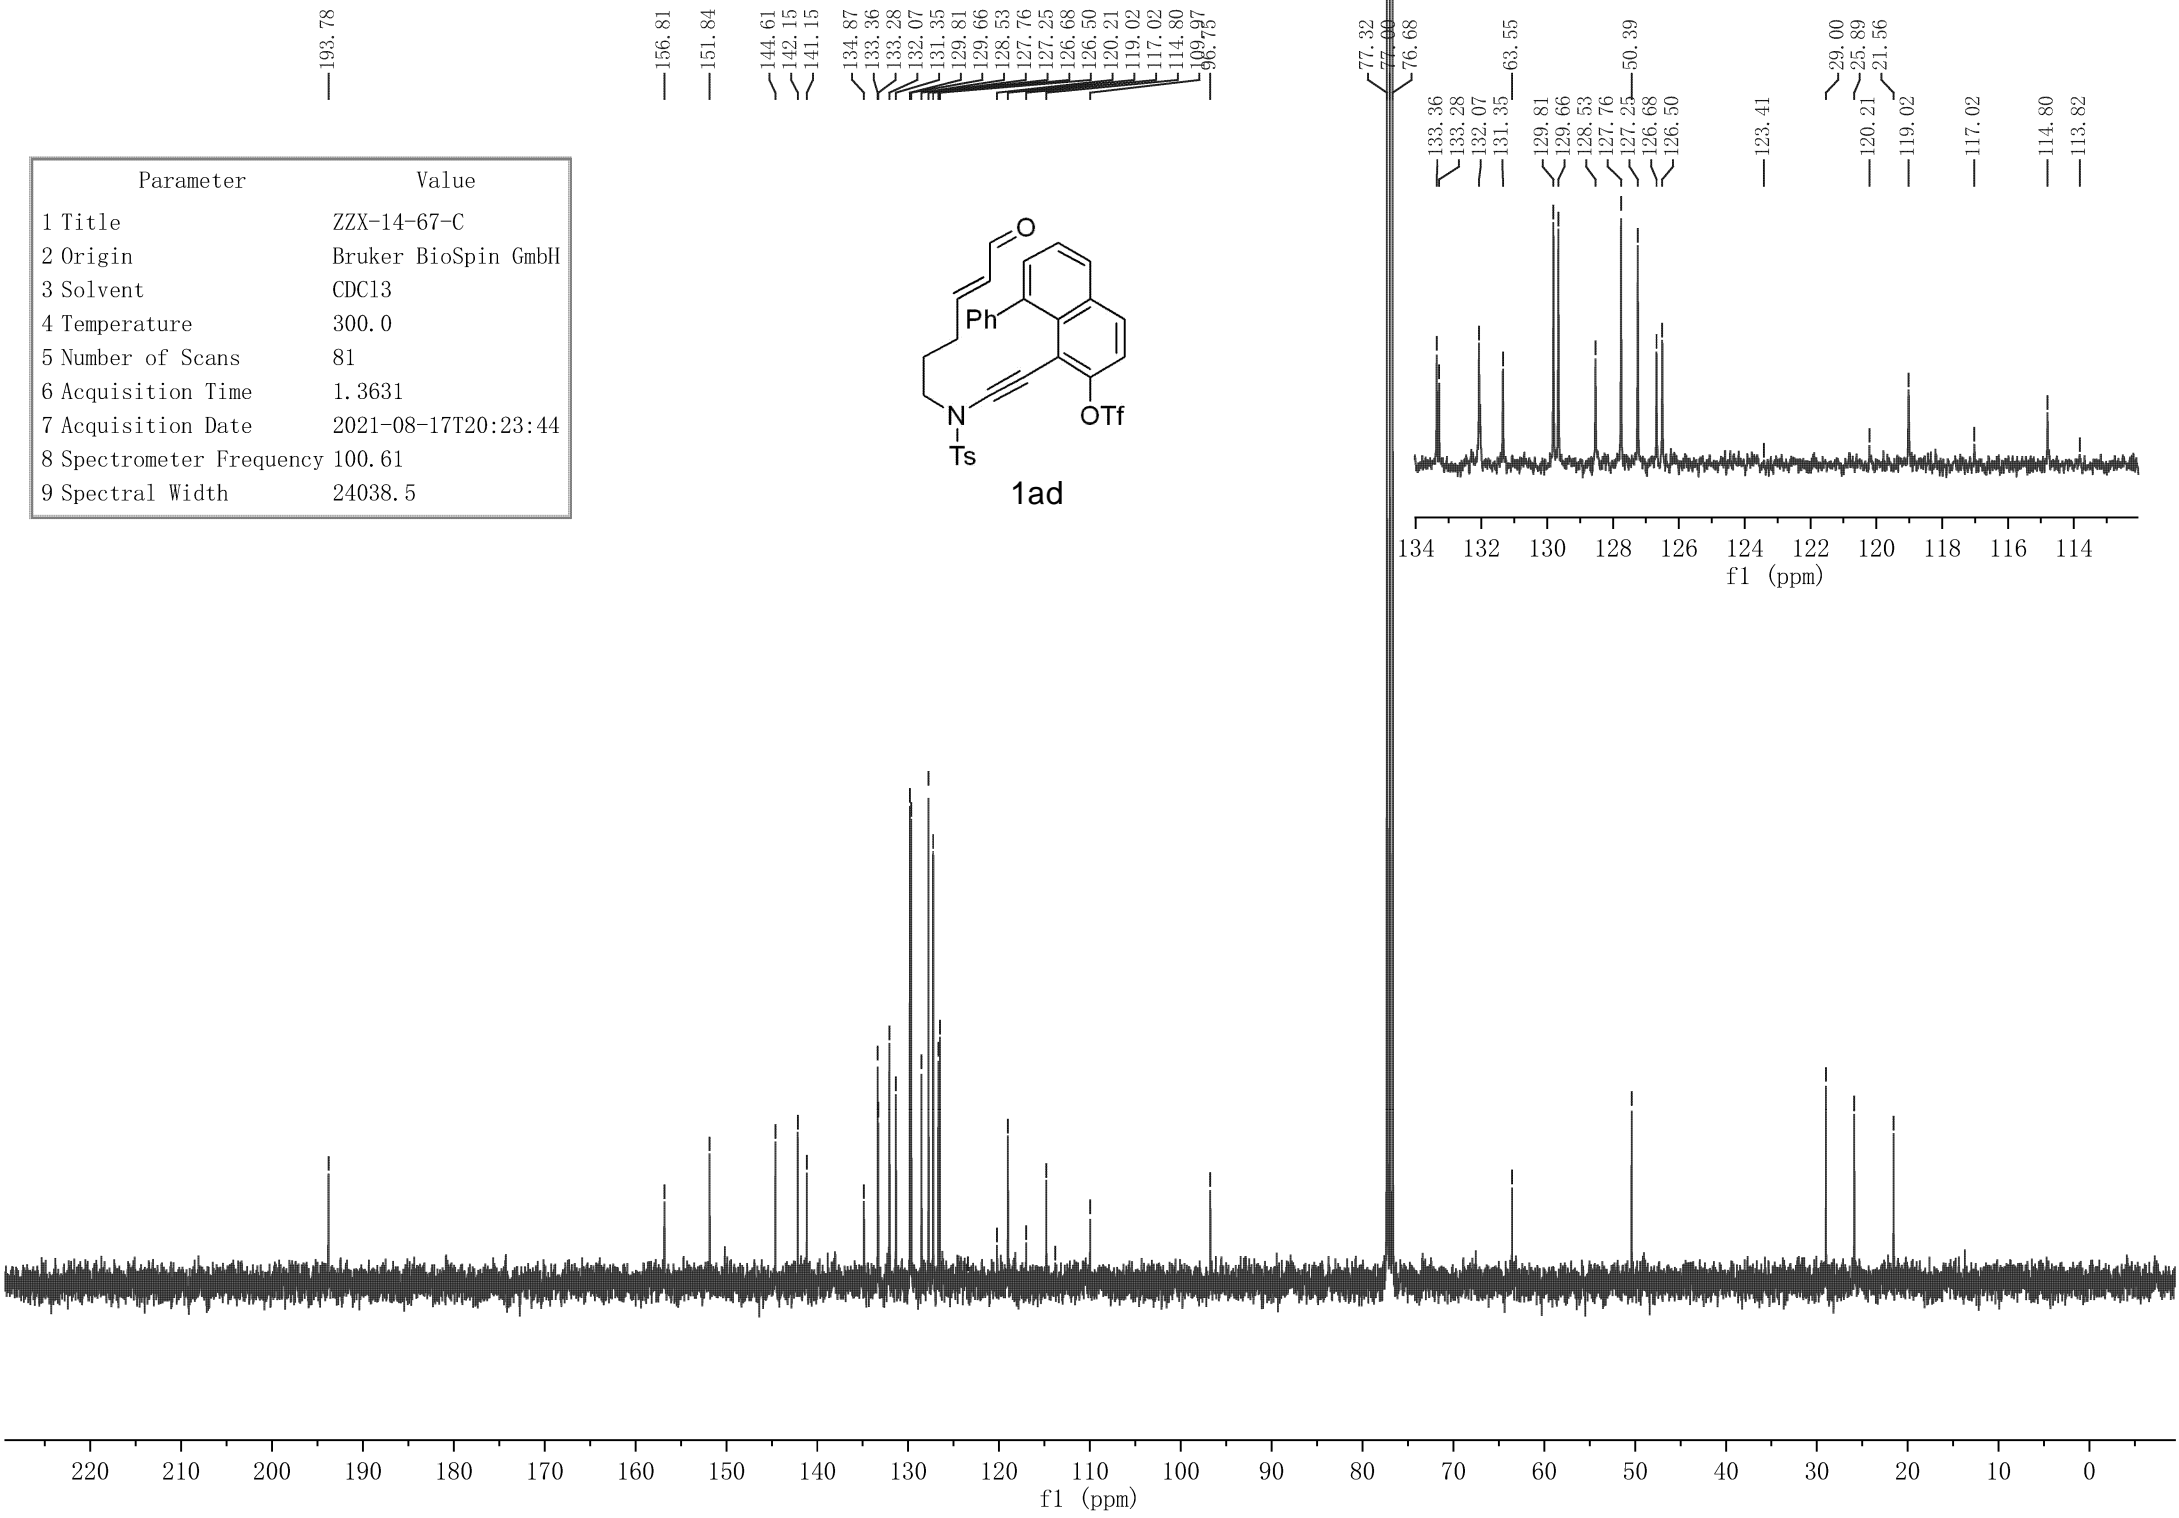

—73.78

| Parameter                | Value               |
|--------------------------|---------------------|
| 1 Title                  | ZZX-18-S-OTf-8-Ph   |
| 2 Origin                 |                     |
| 3 Solvent                | CDC13               |
| 4 Temperature            | 297.5               |
| 5 Number of Scans        | 16                  |
| 6 Acquisition Time       | 1.0000              |
| 7 Acquisition Date       | 2023-02-09T11:27:31 |
| 8 Spectrometer Frequency | 376.28              |
| 9 Spectral Width         | 96153.0             |

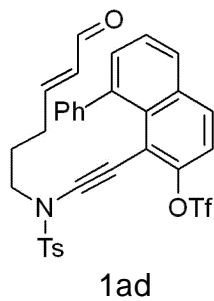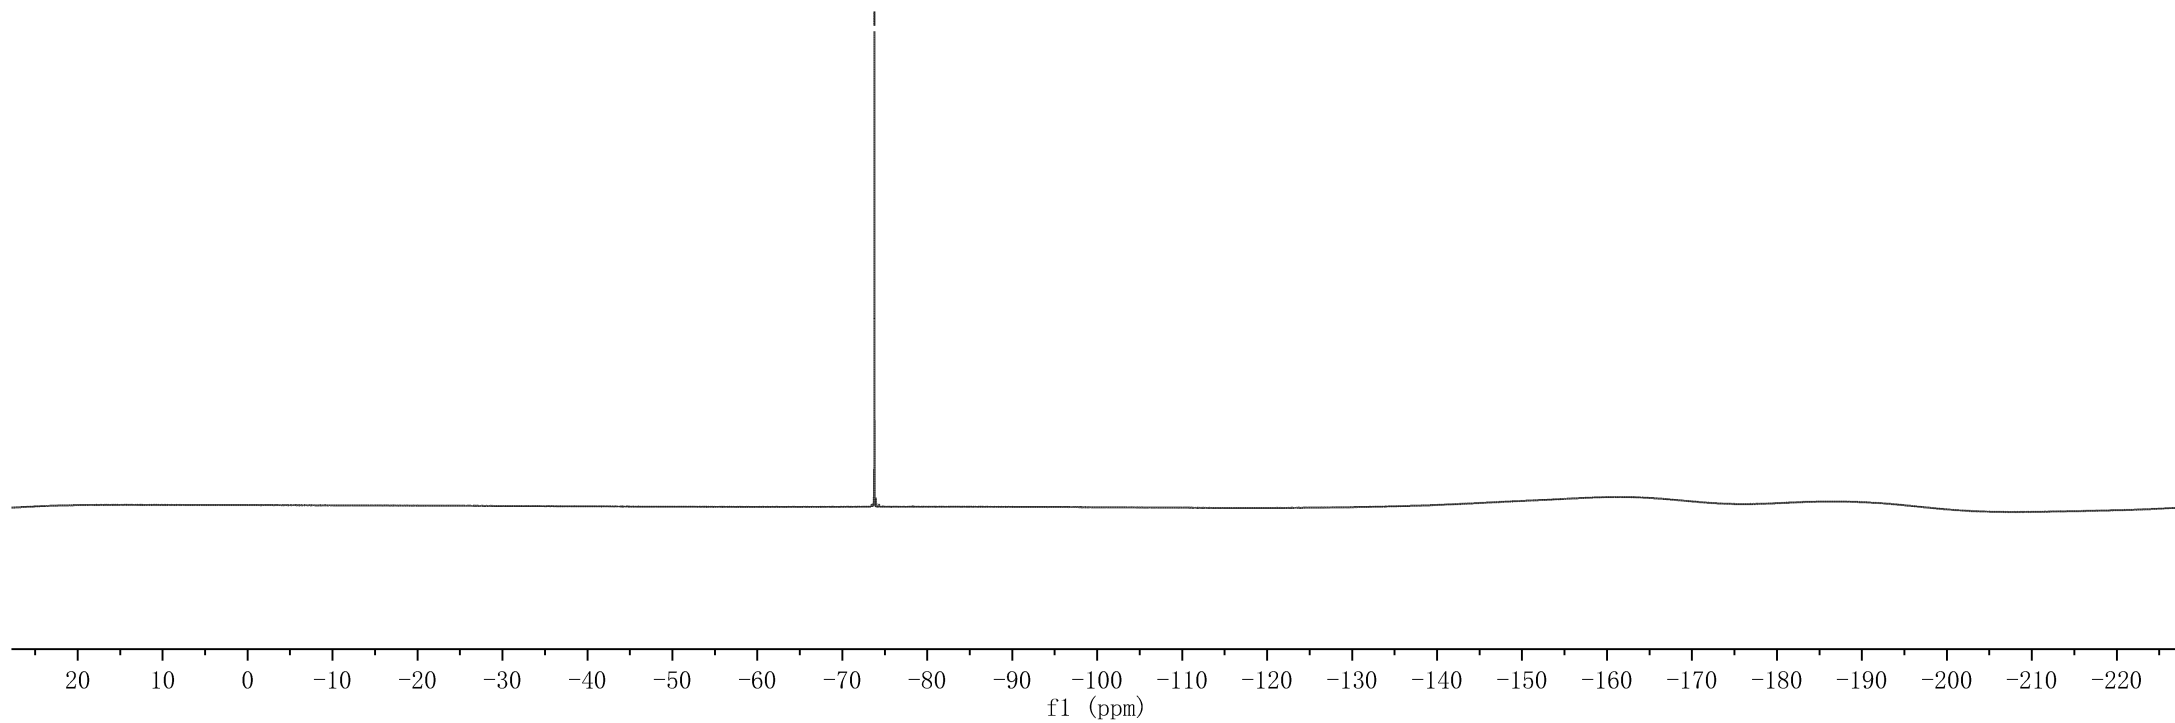



| Parameter                | Value               |
|--------------------------|---------------------|
| 1 Title                  | ZZX-18-31           |
| 2 Origin                 |                     |
| 3 Solvent                | CDC13               |
| 4 Temperature            | 298.0               |
| 5 Number of Scans        | 16                  |
| 6 Acquisition Time       | 4.0002              |
| 7 Acquisition Date       | 2023-01-13T14:50:34 |
| 8 Spectrometer Frequency | 399.90              |
| 9 Spectral Width         | 8012.0              |

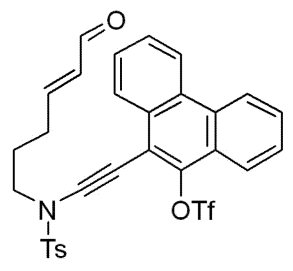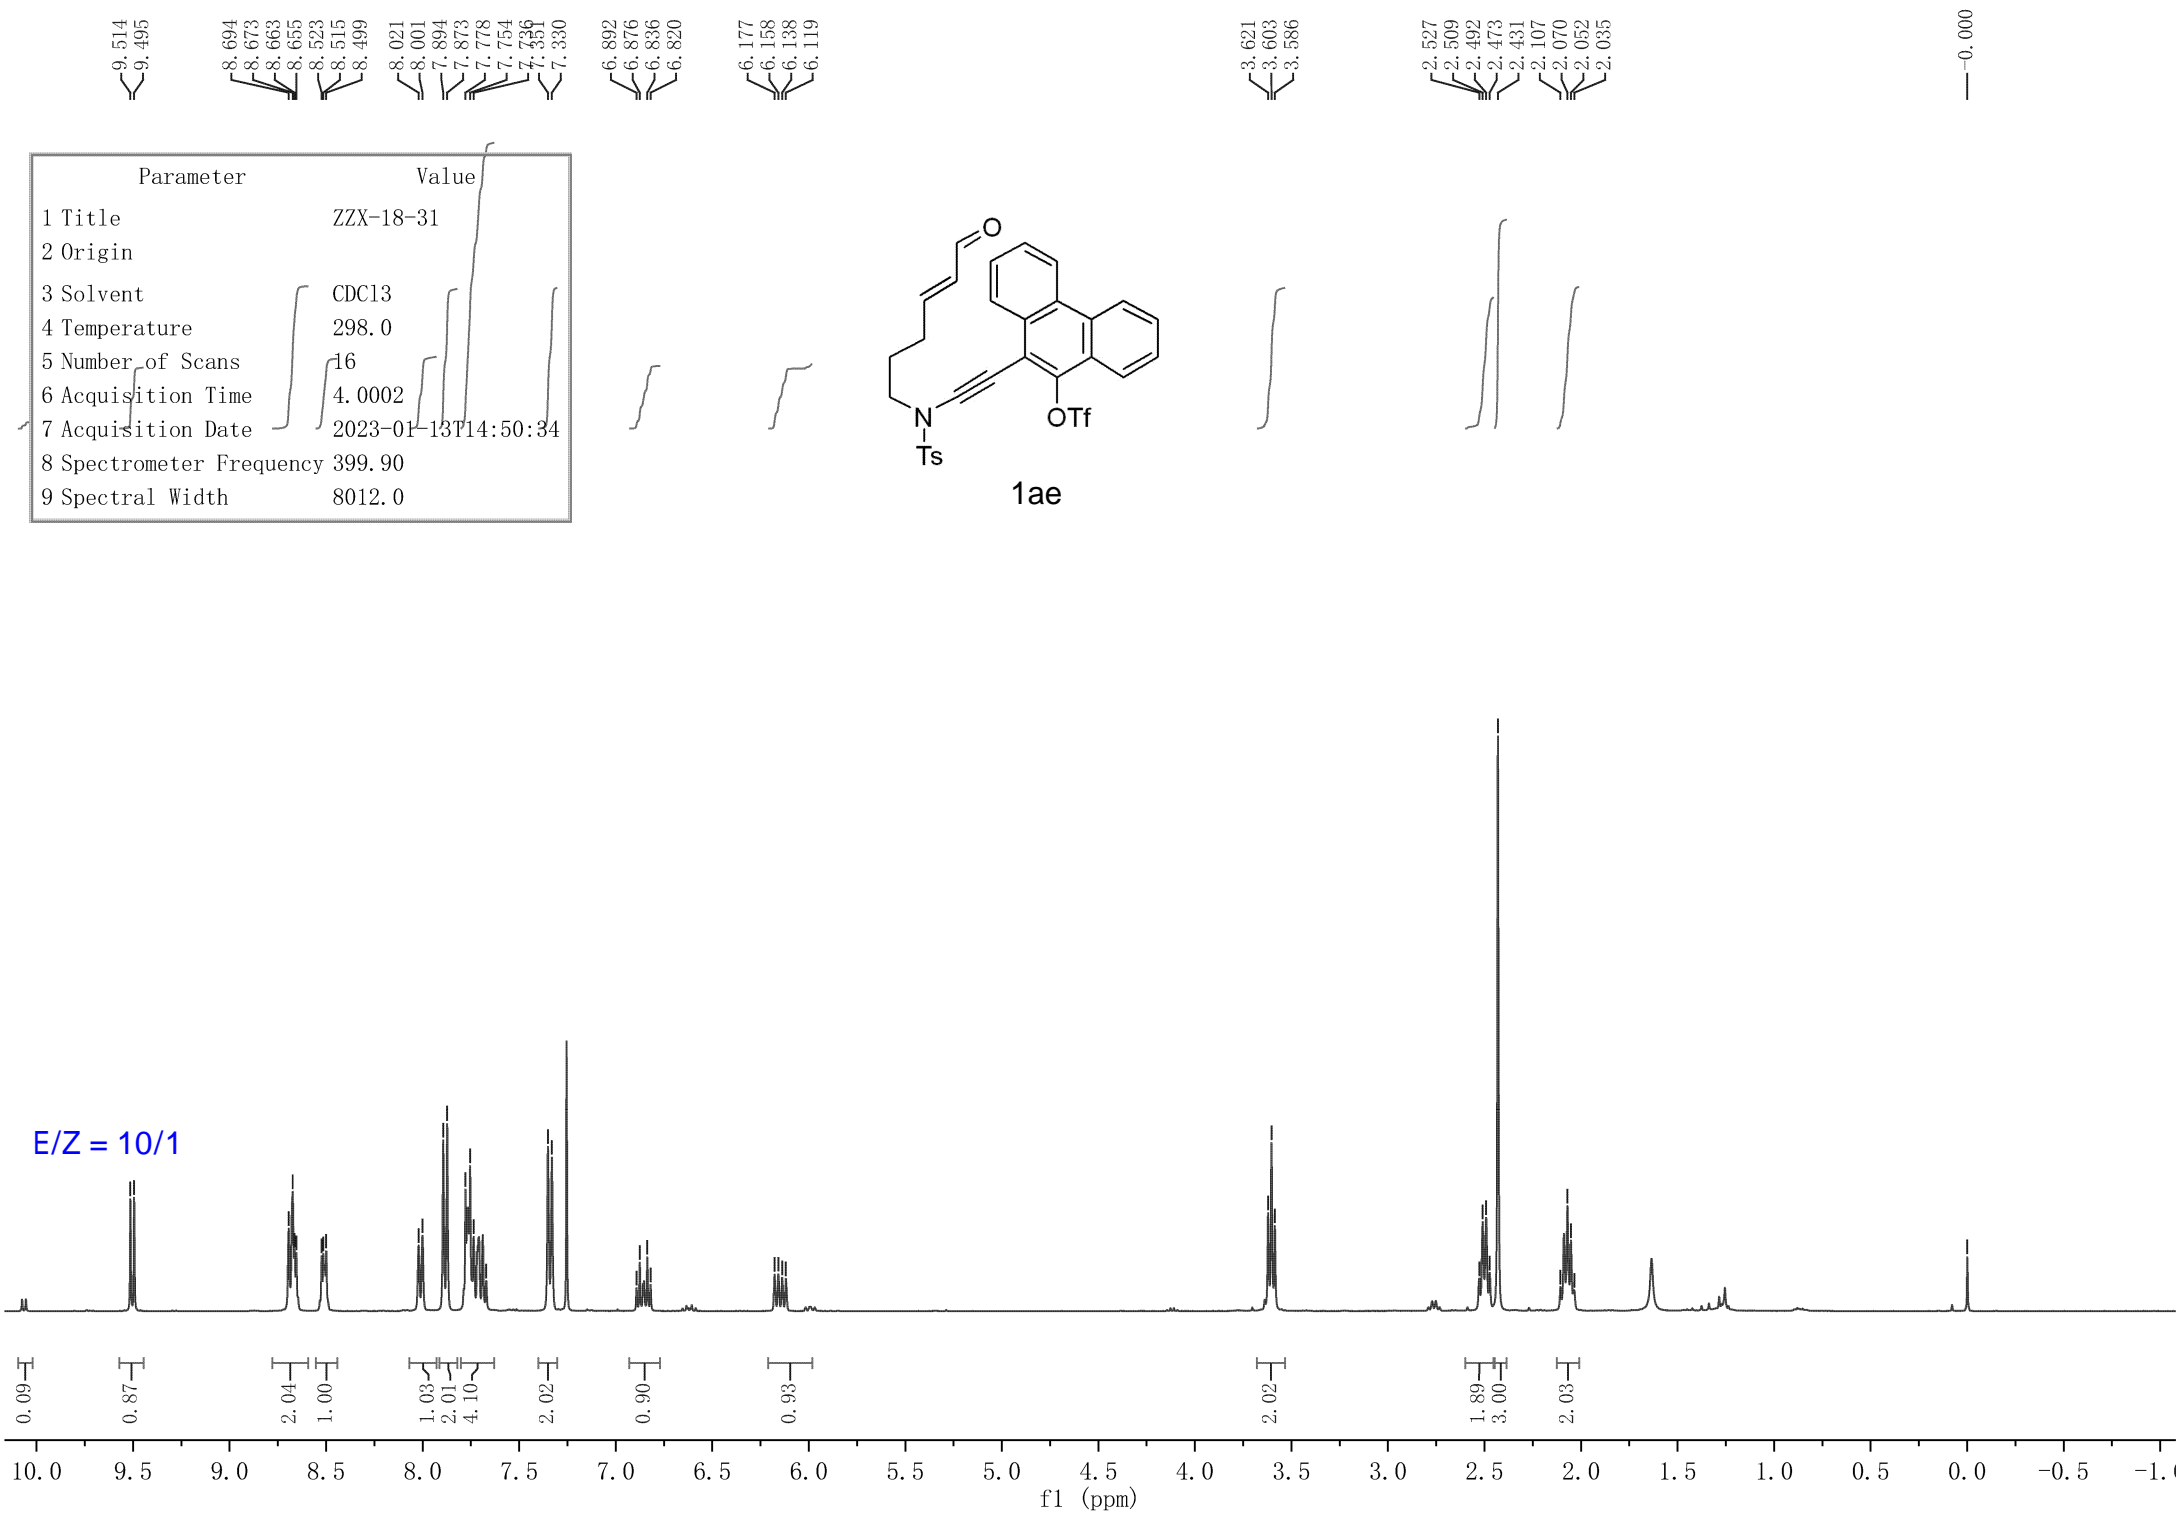

9.514  
9.495

8.694  
8.673  
8.663  
8.655  
8.523  
8.515  
8.499

8.021  
8.001  
7.894  
7.873  
7.778  
7.754  
7.736  
7.735  
7.330

6.892  
6.876  
6.836  
6.820

6.177  
6.158  
6.138  
6.119

3.621  
3.603  
3.586

2.527  
2.509  
2.492  
2.473  
2.431  
2.107  
2.070  
2.052  
2.035

0.000

| Parameter                | Value               |
|--------------------------|---------------------|
| 1 Title                  | ZZX-18-31           |
| 2 Origin                 |                     |
| 3 Solvent                | CDC13               |
| 4 Temperature            | 298.1               |
| 5 Number of Scans        | 600                 |
| 6 Acquisition Time       | 1.0000              |
| 7 Acquisition Date       | 2023-01-13T15:13:18 |
| 8 Spectrometer Frequency | 100.56              |
| 9 Spectral Width         | 26041.0             |

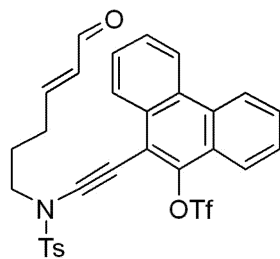

1ae

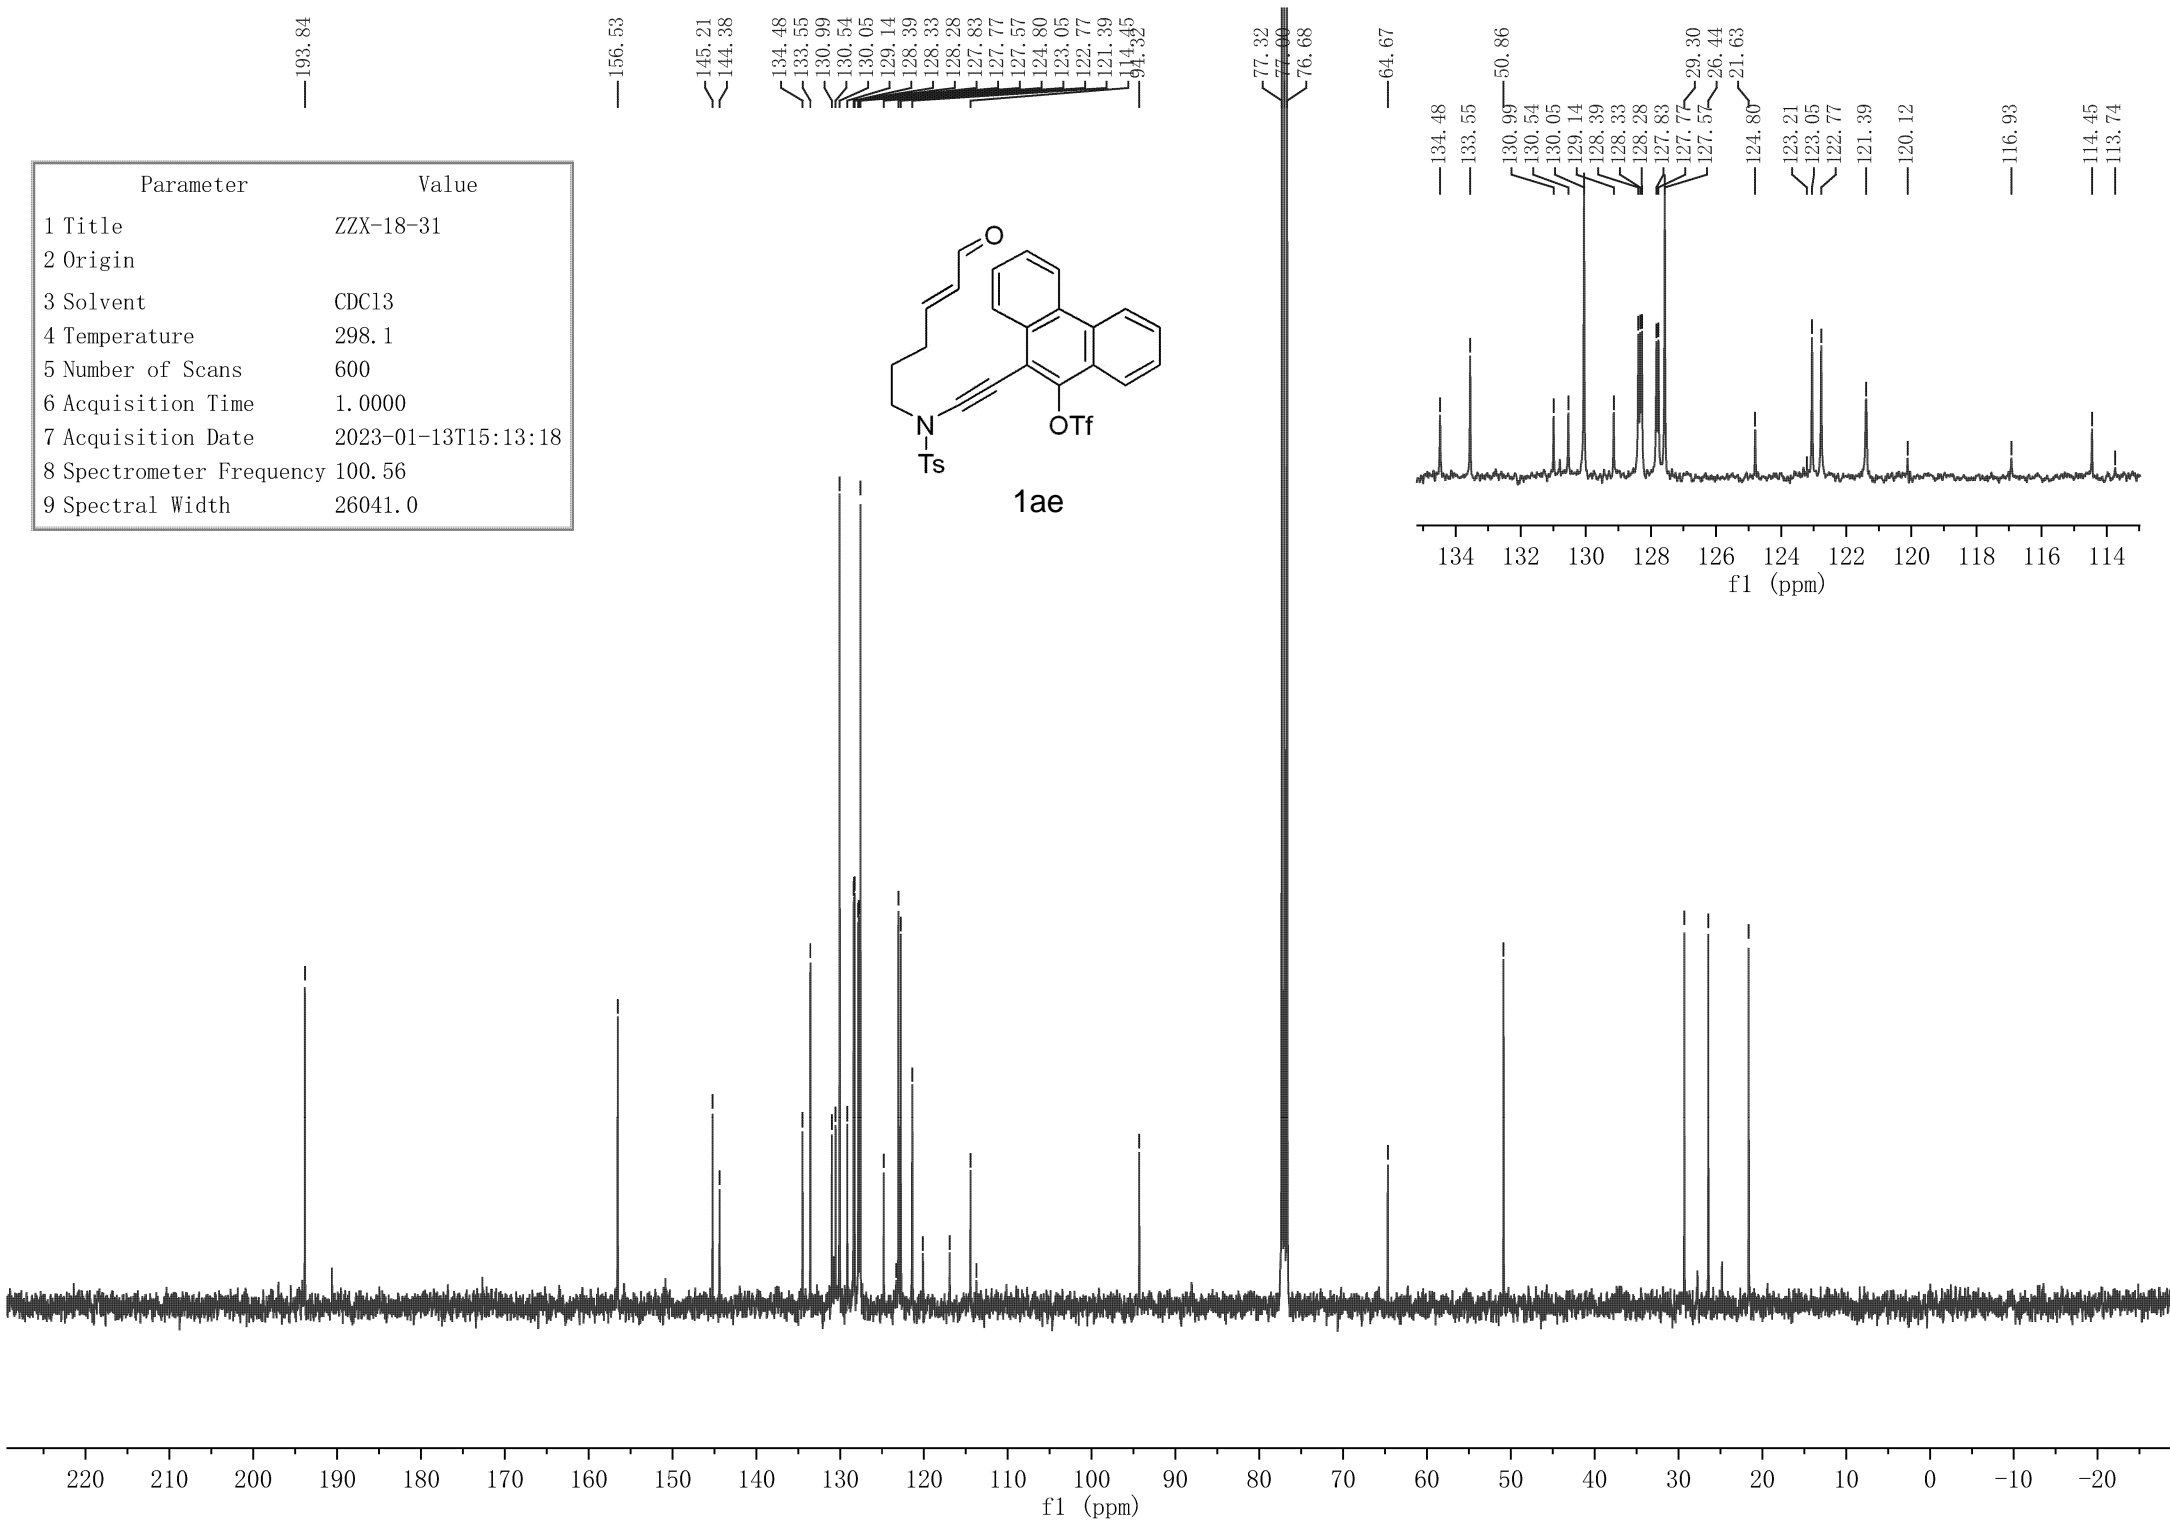

| Parameter                | Value               |
|--------------------------|---------------------|
| 1 Title                  | ZZX-18-31           |
| 2 Origin                 |                     |
| 3 Solvent                | CDC13               |
| 4 Temperature            | 297.8               |
| 5 Number of Scans        | 16                  |
| 6 Acquisition Time       | 1.0000              |
| 7 Acquisition Date       | 2023-01-13T15:16:18 |
| 8 Spectrometer Frequency | 376.28              |
| 9 Spectral Width         | 96153.0             |

—72.91

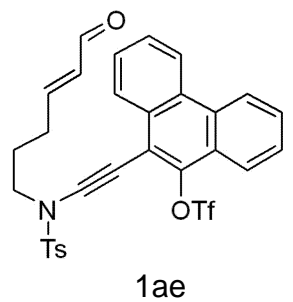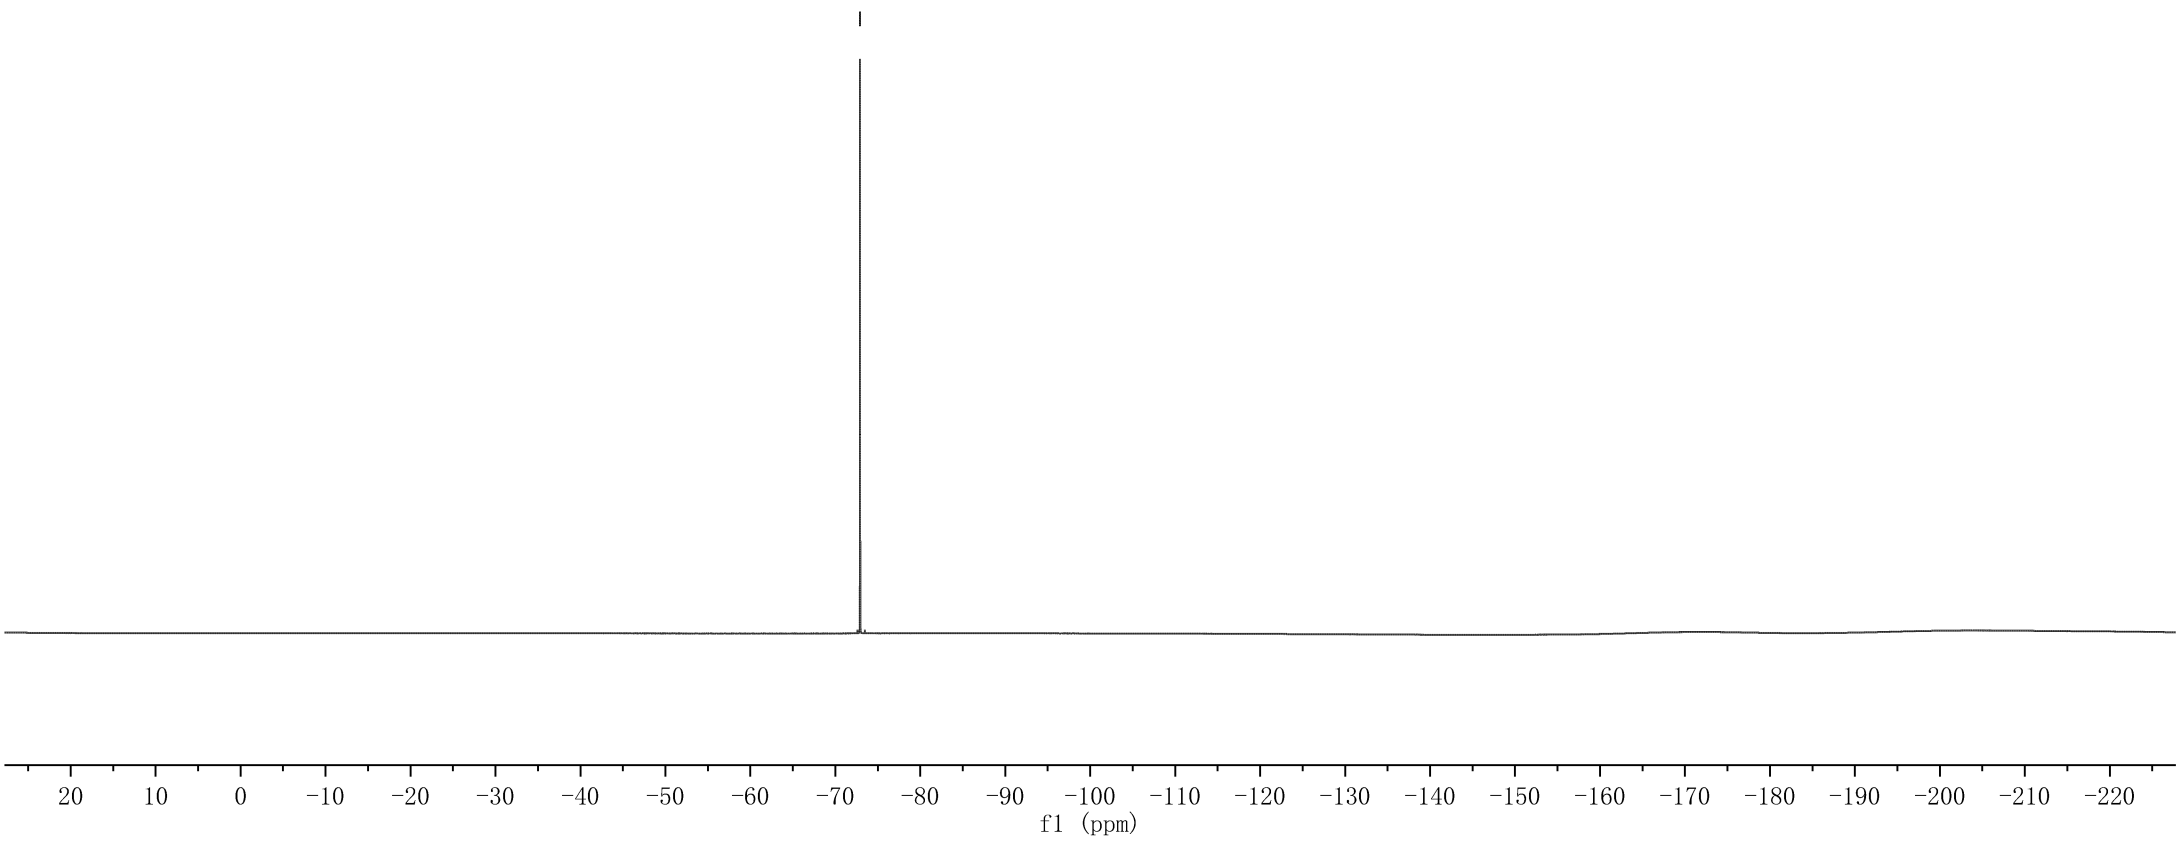

9.507  
9.488

7.838  
7.818

7.365  
7.344  
7.040  
7.018  
6.960  
6.938  
6.868  
6.852  
6.813  
6.796  
6.147  
6.127  
6.108  
6.088

3.523  
3.505  
3.488  
3.248  
3.231  
2.850  
2.752  
2.738  
2.450  
2.430  
2.417  
2.404  
1.999  
1.981  
1.963  
1.945  
1.872  
1.829  
1.793  
1.763

— 0.000

| Parameter                | Value               |
|--------------------------|---------------------|
| 1 Title                  | zzx-15-71-1         |
| 2 Origin                 | Bruker BioSpin GmbH |
| 3 Solvent                | CDC13               |
| 4 Temperature            | 298.0               |
| 5 Number of Scans        | 7                   |
| 6 Acquisition Time       | 4.0894              |
| 7 Acquisition Date       | 2021-12-29T08:59:36 |
| 8 Spectrometer Frequency | 400.13              |
| 9 Spectral Width         | 8012.8              |

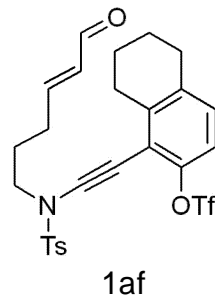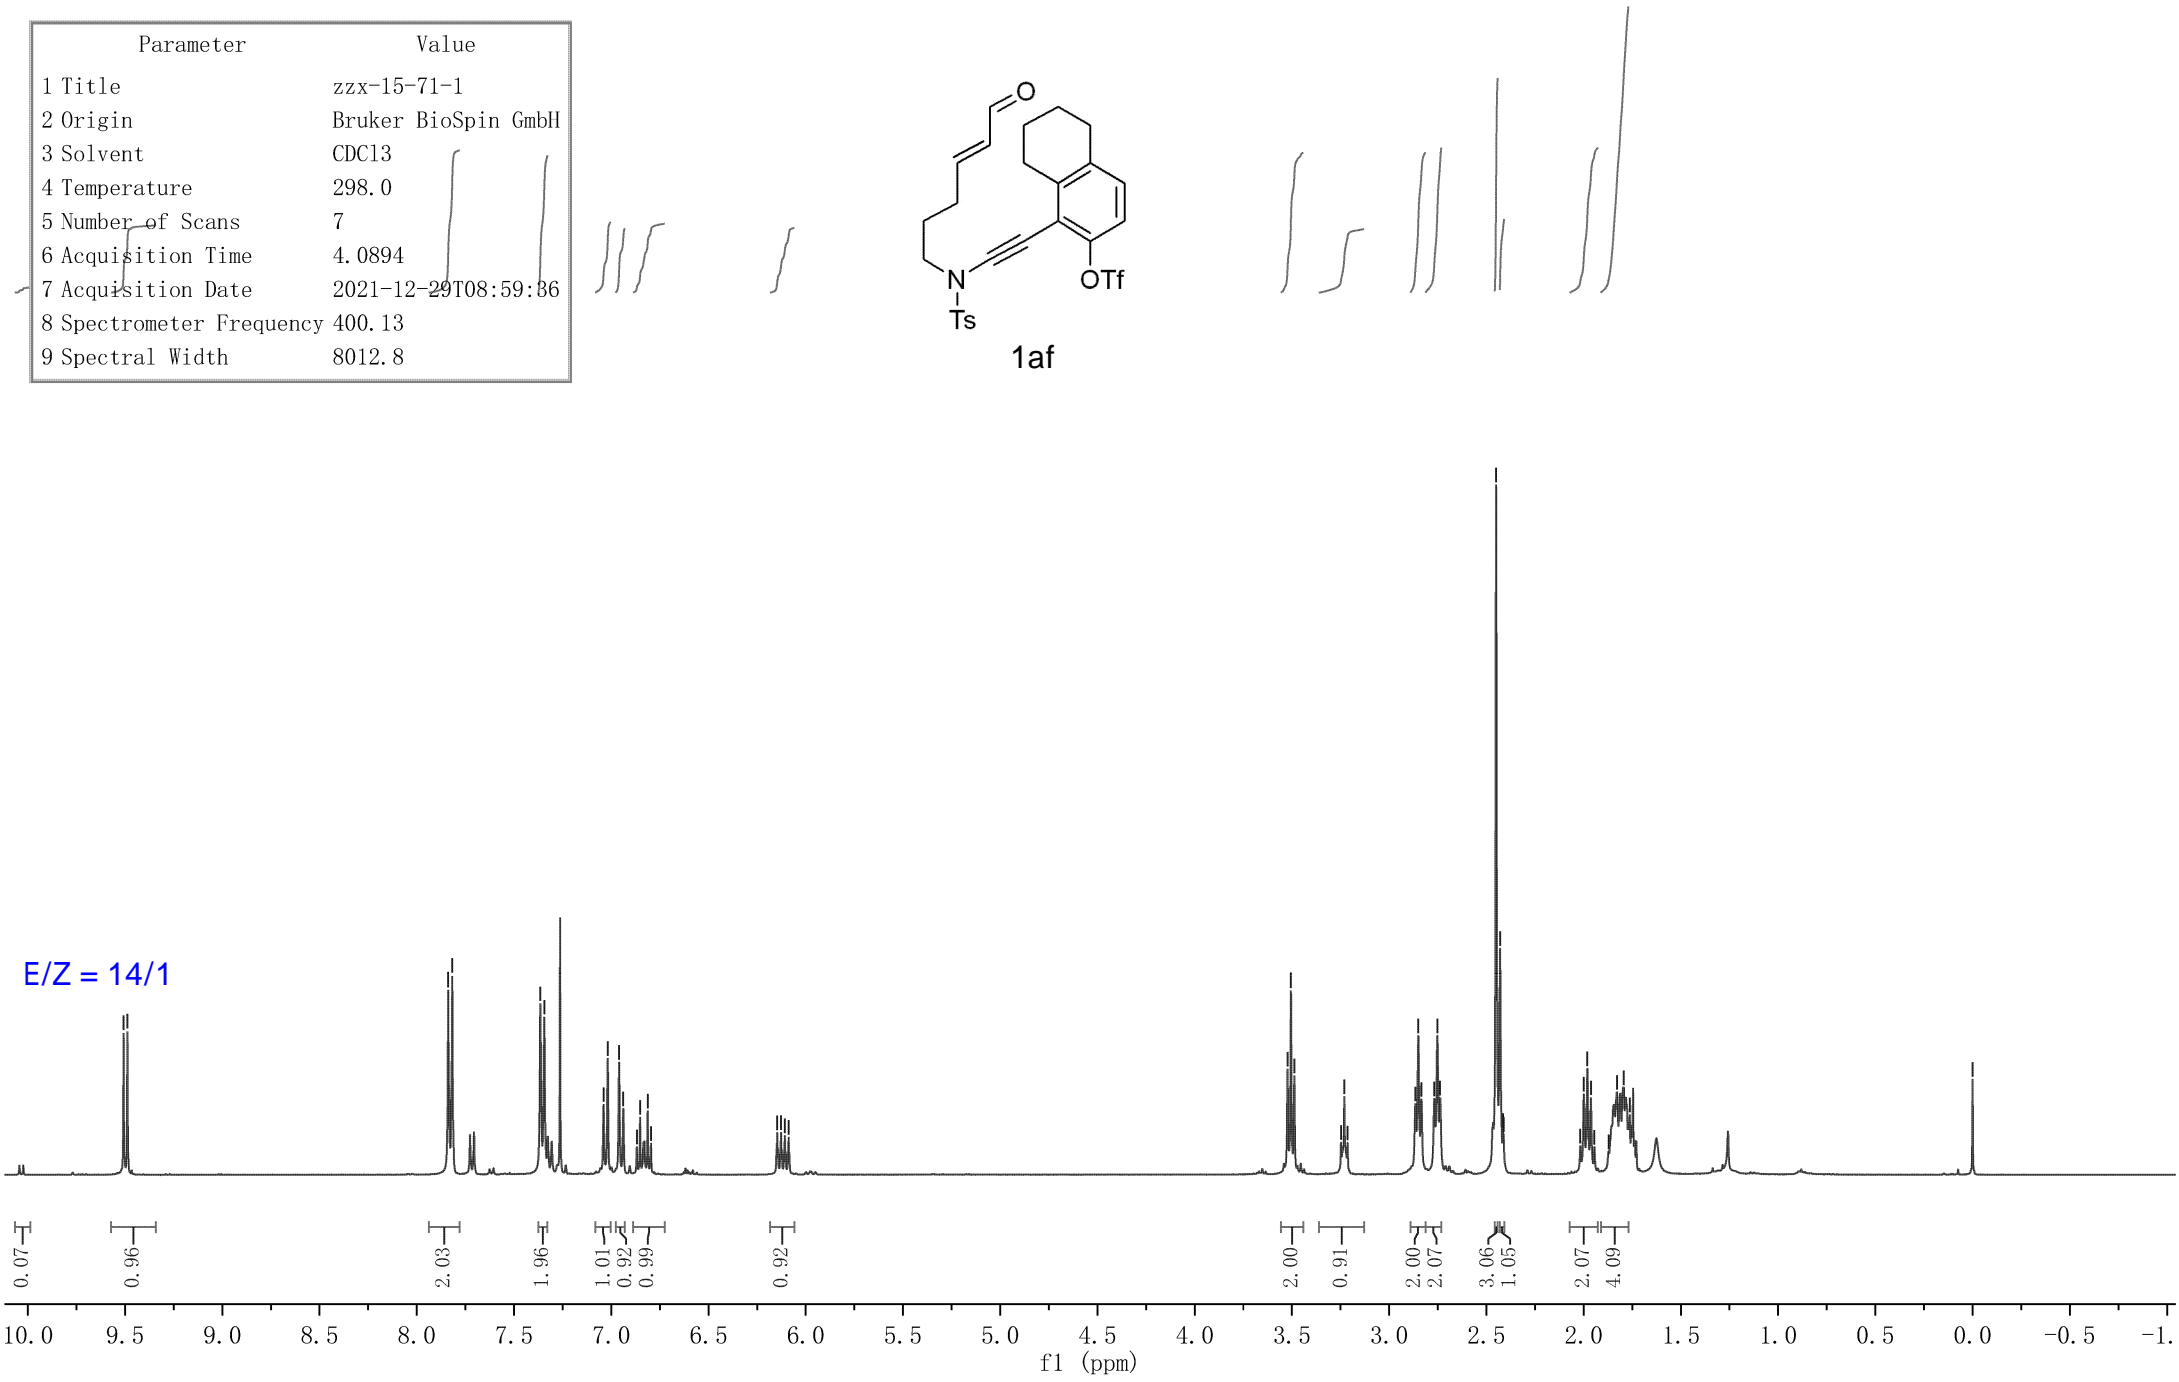

| Parameter                | Value               |
|--------------------------|---------------------|
| 1 Title                  | zzx-15-71-1-C       |
| 2 Origin                 | Bruker BioSpin GmbH |
| 3 Solvent                | CDC13               |
| 4 Temperature            | 300.0               |
| 5 Number of Scans        | 106                 |
| 6 Acquisition Time       | 1.3631              |
| 7 Acquisition Date       | 2021-12-29T09:01:08 |
| 8 Spectrometer Frequency | 100.61              |
| 9 Spectral Width         | 24038.5             |

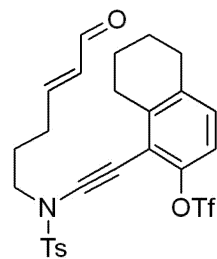

1af

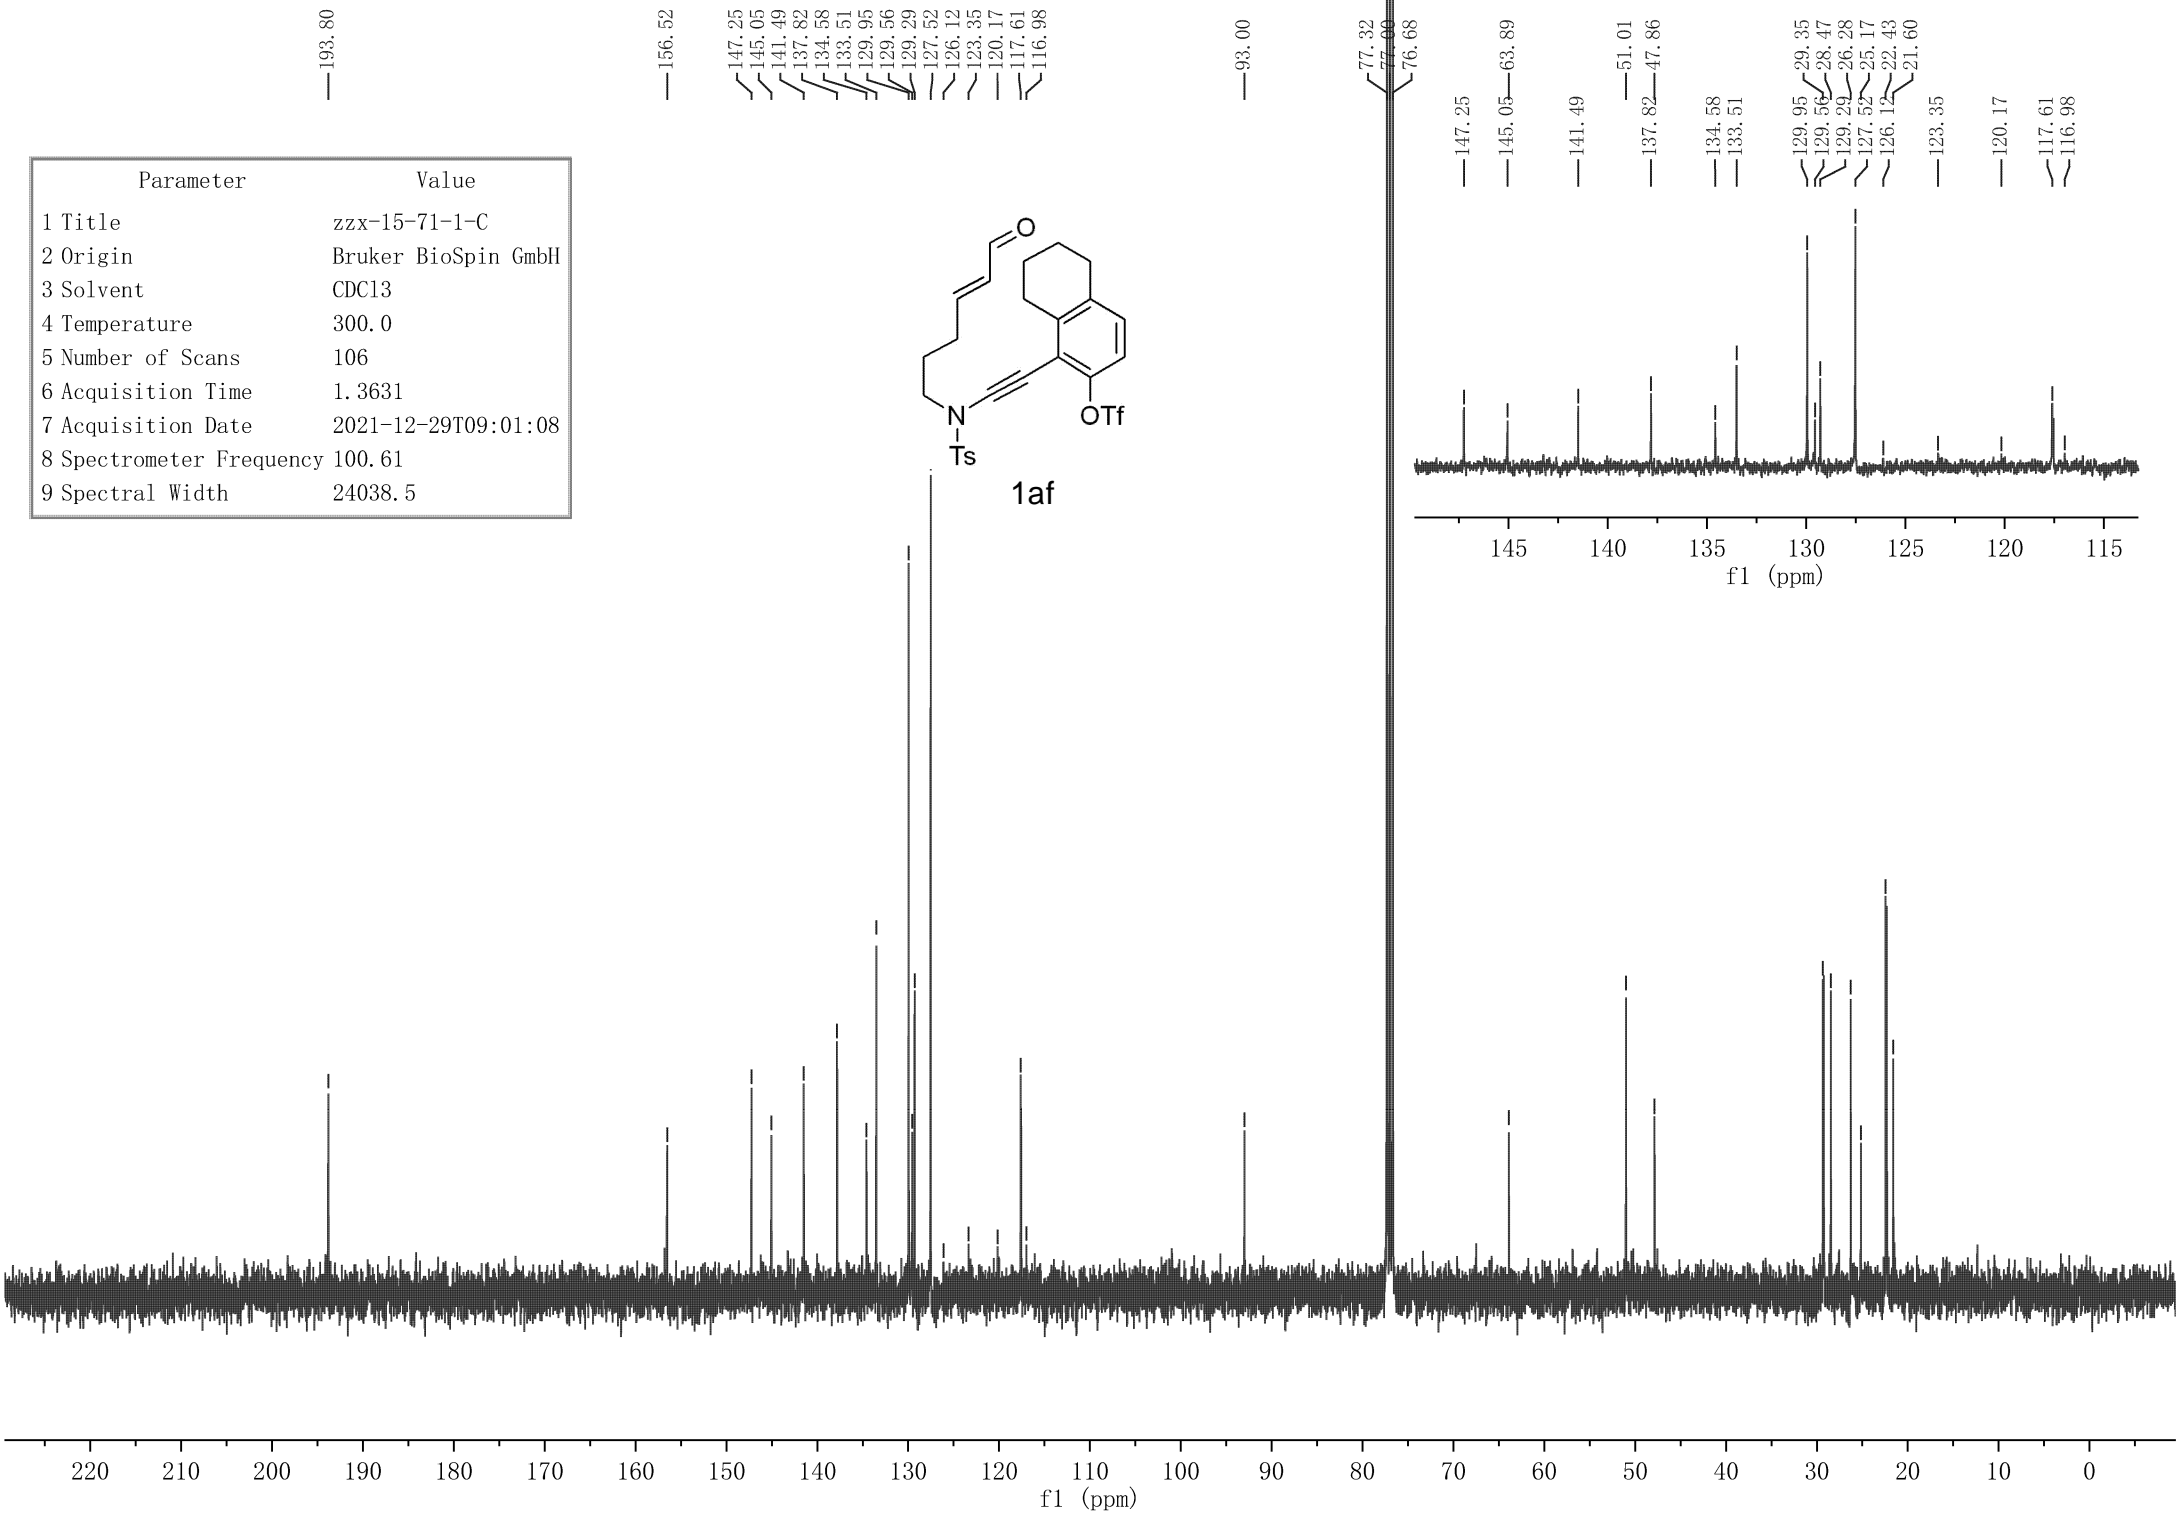

| Parameter                | Value                |
|--------------------------|----------------------|
| 1 Title                  | ZZX-18-S-OTf-4H-naph |
| 2 Origin                 |                      |
| 3 Solvent                | CDC13                |
| 4 Temperature            | 297.5                |
| 5 Number of Scans        | 16                   |
| 6 Acquisition Time       | 1.0000               |
| 7 Acquisition Date       | 2023-02-09T11:23:35  |
| 8 Spectrometer Frequency | 376.28               |
| 9 Spectral Width         | 96153.0              |

—73.75

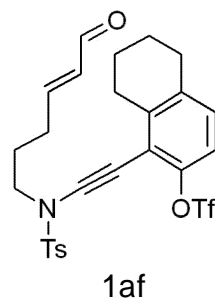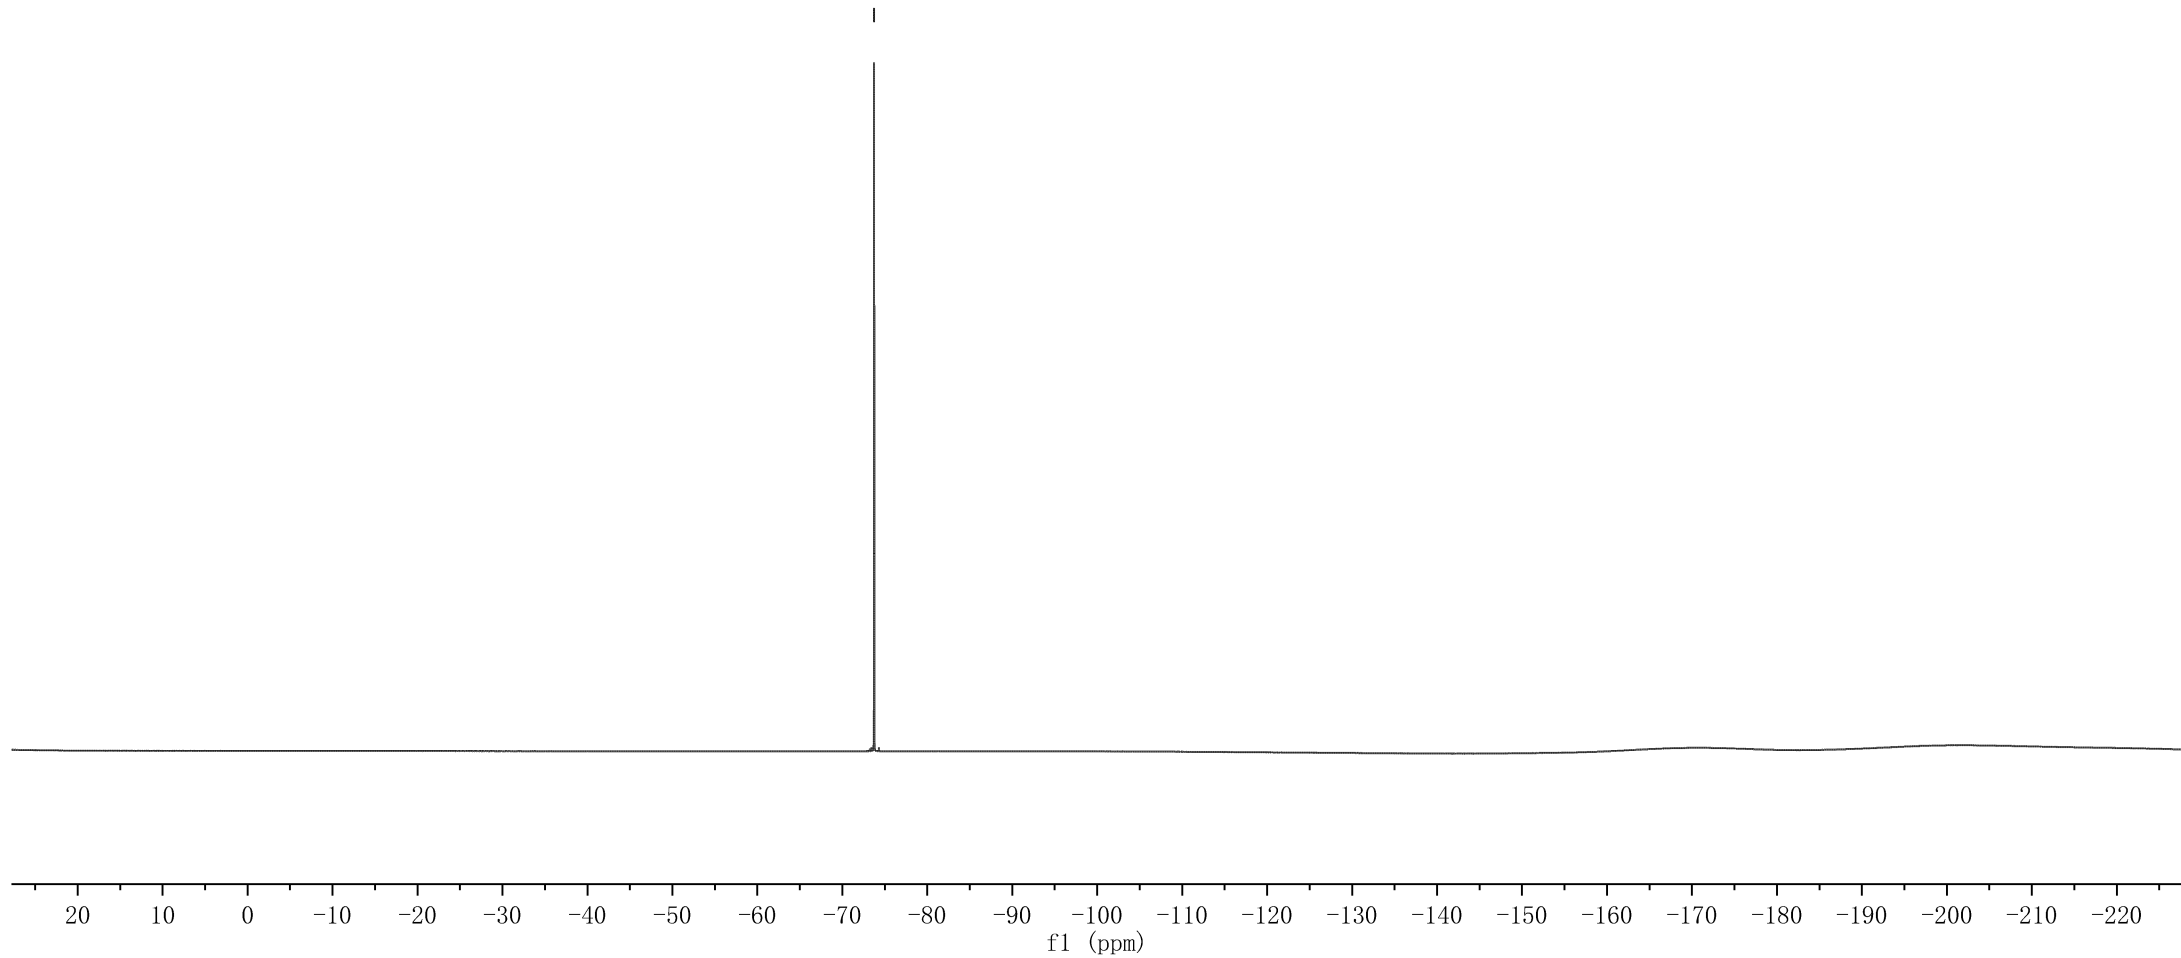

9.511  
9.492

8.302  
8.282  
7.927  
7.906  
7.805  
7.784  
7.772  
7.464  
7.442  
7.355  
6.884  
6.874  
6.835  
6.819

6.171  
6.152  
6.132  
6.113

3.617  
3.600  
3.583

2.535  
2.518  
2.500  
2.482  
2.430  
2.163  
2.146  
2.127  
2.110  
2.092

0.000

| Parameter                | Value               |
|--------------------------|---------------------|
| 1 Title                  | zzx-12-56-H         |
| 2 Origin                 | Bruker BioSpin GmbH |
| 3 Solvent                | CDC13               |
| 4 Temperature            | 298.0               |
| 5 Number of Scans        | 8                   |
| 6 Acquisition Time       | 4.0894              |
| 7 Acquisition Date       | 2021-01-12 16:37:57 |
| 8 Spectrometer Frequency | 400.13              |
| 9 Spectral Width         | 8012.8              |

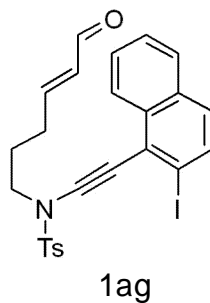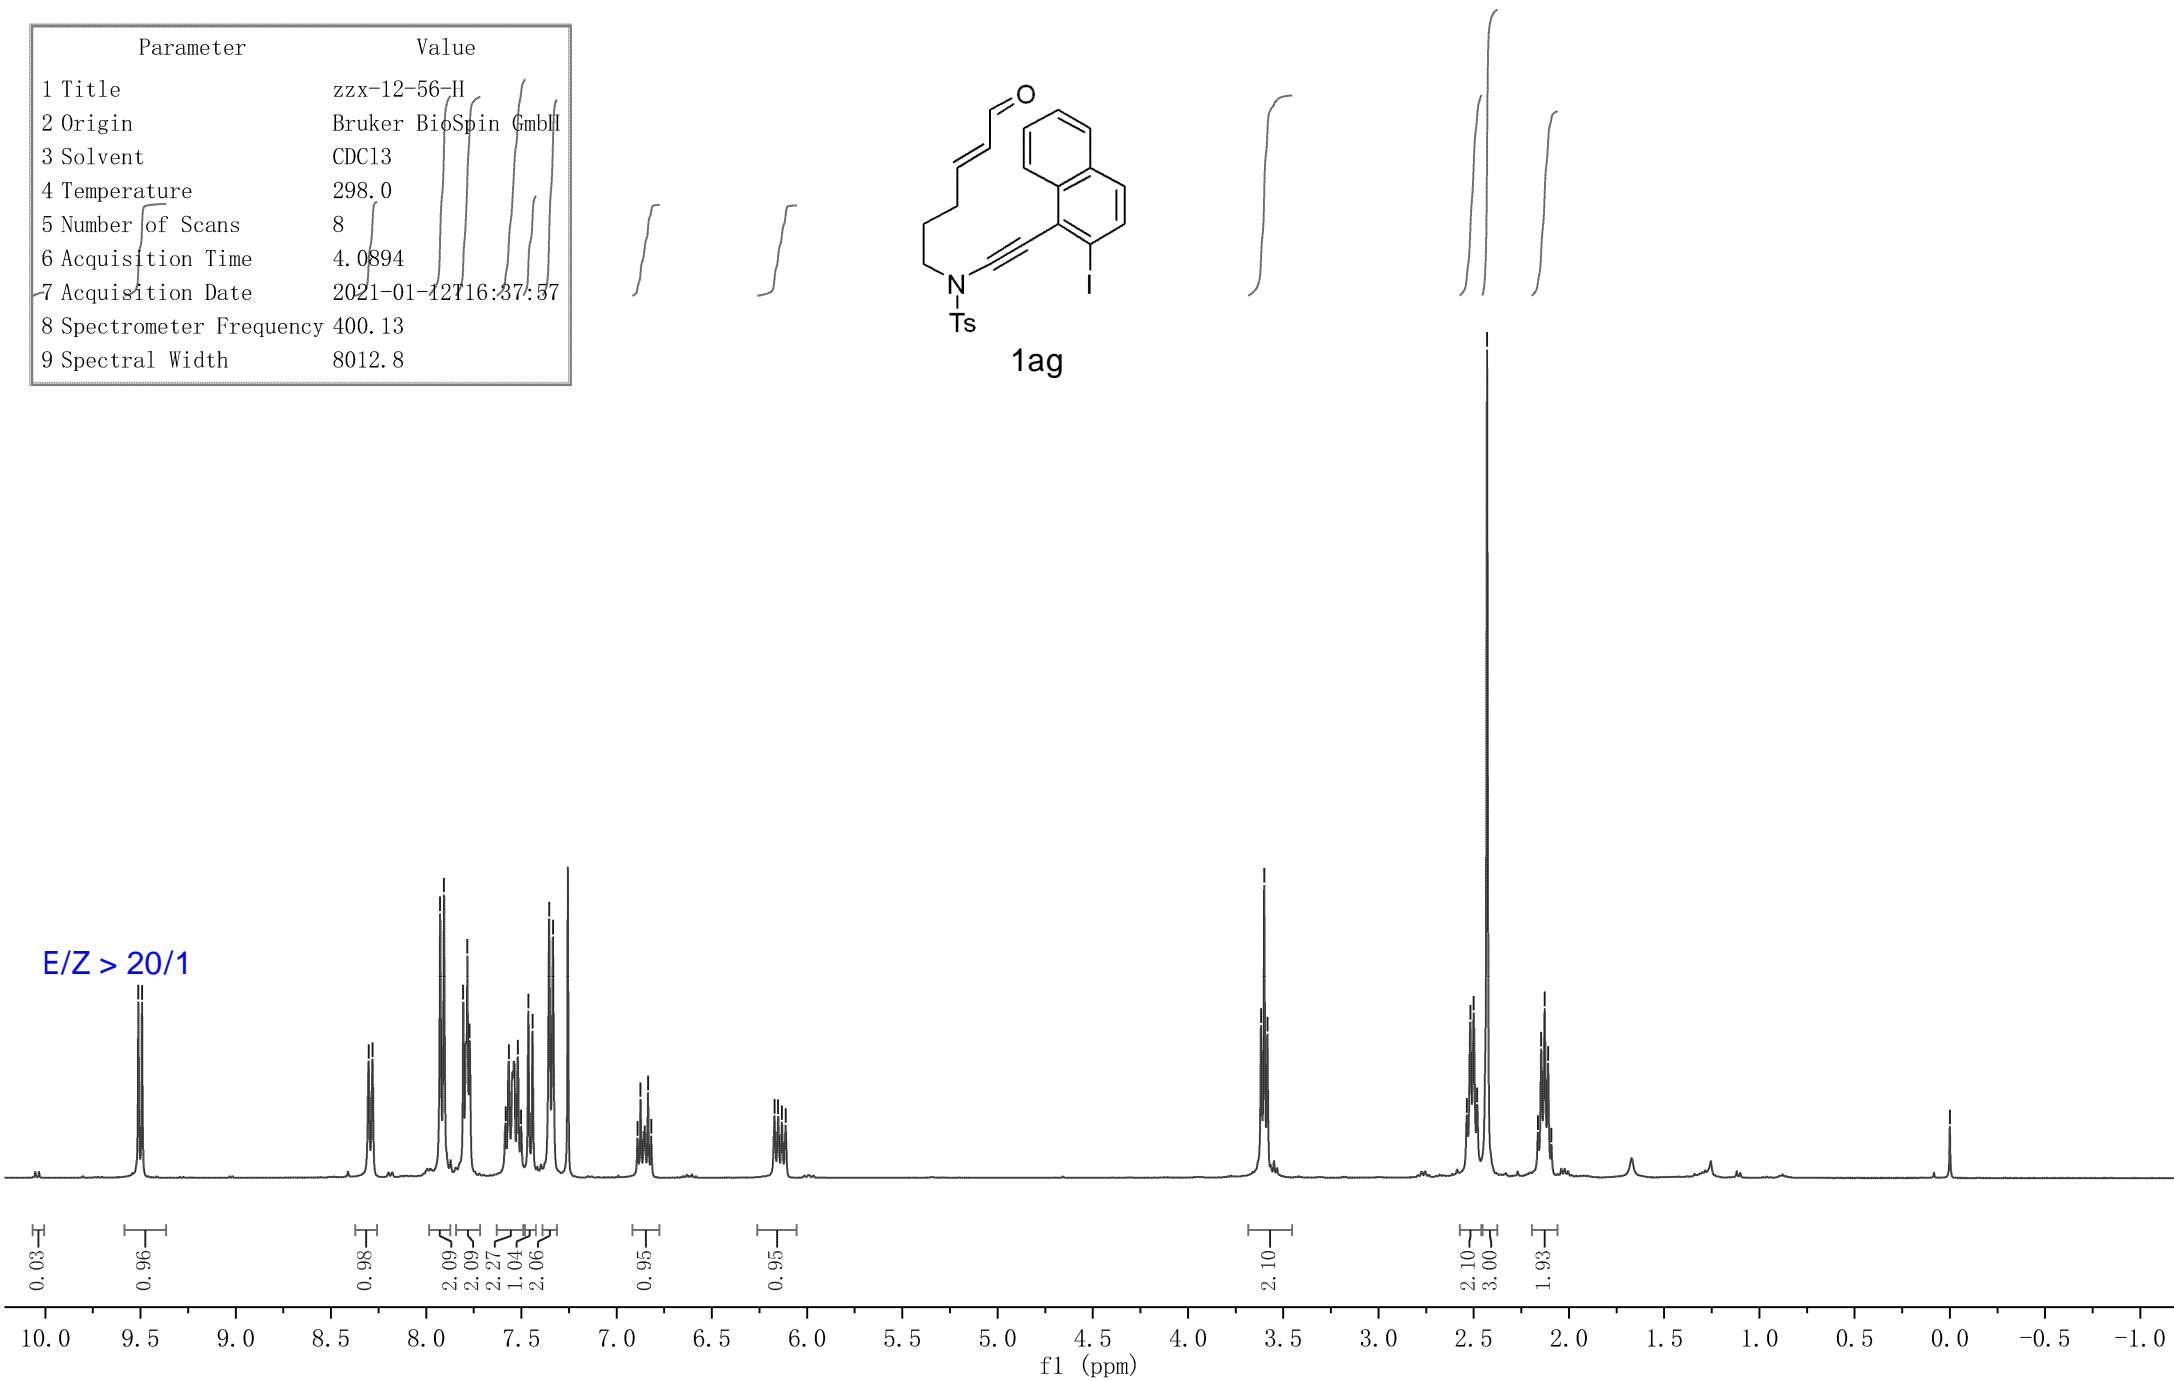

| Parameter                | Value               |
|--------------------------|---------------------|
| 1 Title                  | zzx-12-56-C-1       |
| 2 Origin                 | Bruker BioSpin GmbH |
| 3 Solvent                | CDC13               |
| 4 Temperature            | 300.0               |
| 5 Number of Scans        | 94                  |
| 6 Acquisition Time       | 1.3631              |
| 7 Acquisition Date       | 2021-01-12T16:41:50 |
| 8 Spectrometer Frequency | 100.61              |
| 9 Spectral Width         | 24038.5             |

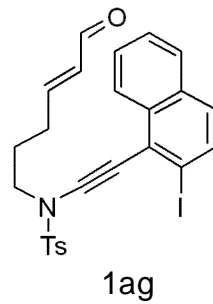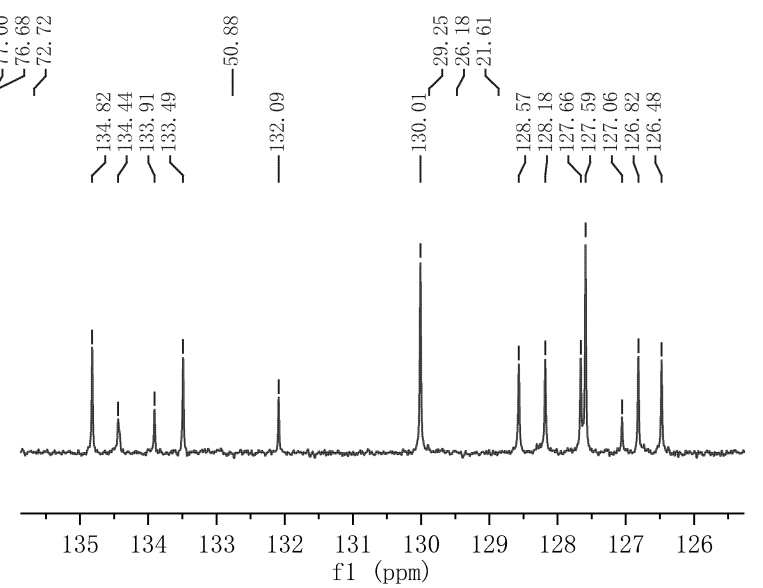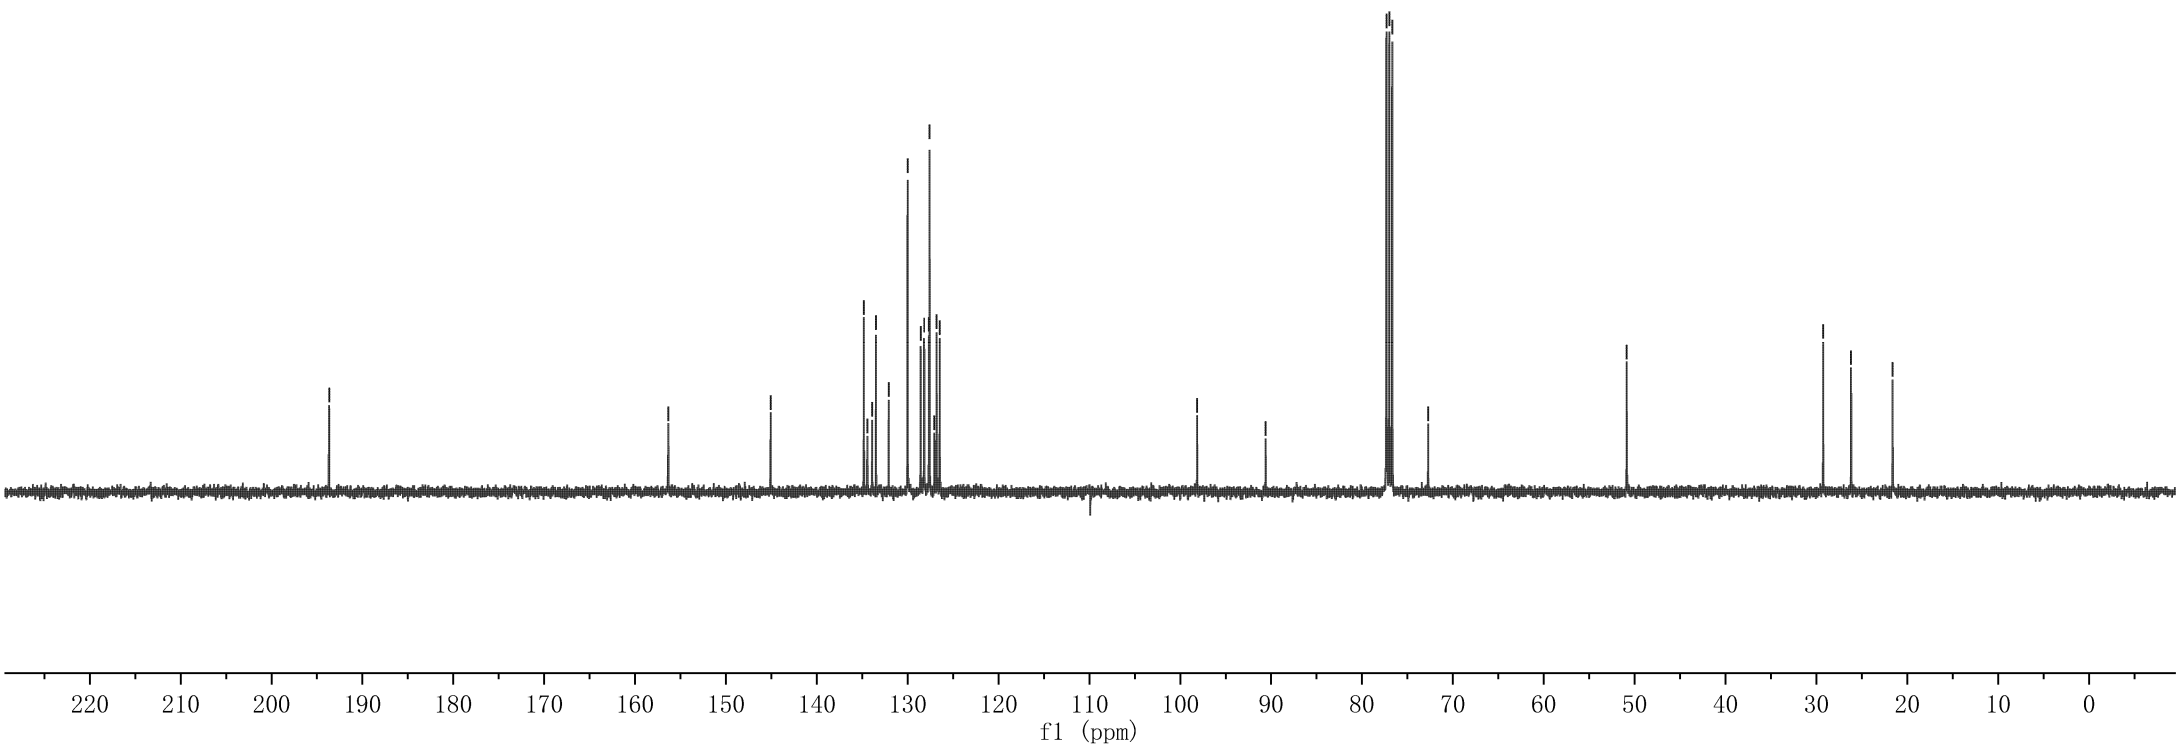



| Parameter                | Value               |
|--------------------------|---------------------|
| 1 Title                  | zzx-11-116-H        |
| 2 Origin                 | Bruker BioSpin GmbH |
| 3 Solvent                | CDC13               |
| 4 Temperature            | 298.0               |
| 5 Number of Scans        | 5                   |
| 6 Acquisition Time       | 4.0894              |
| 7 Acquisition Date       | 2020-11-18T09:38:58 |
| 8 Spectrometer Frequency | 400.13              |
| 9 Spectral Width         | 8012.8              |

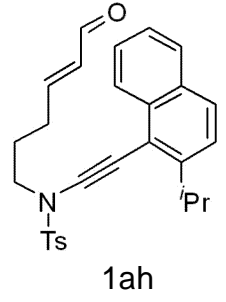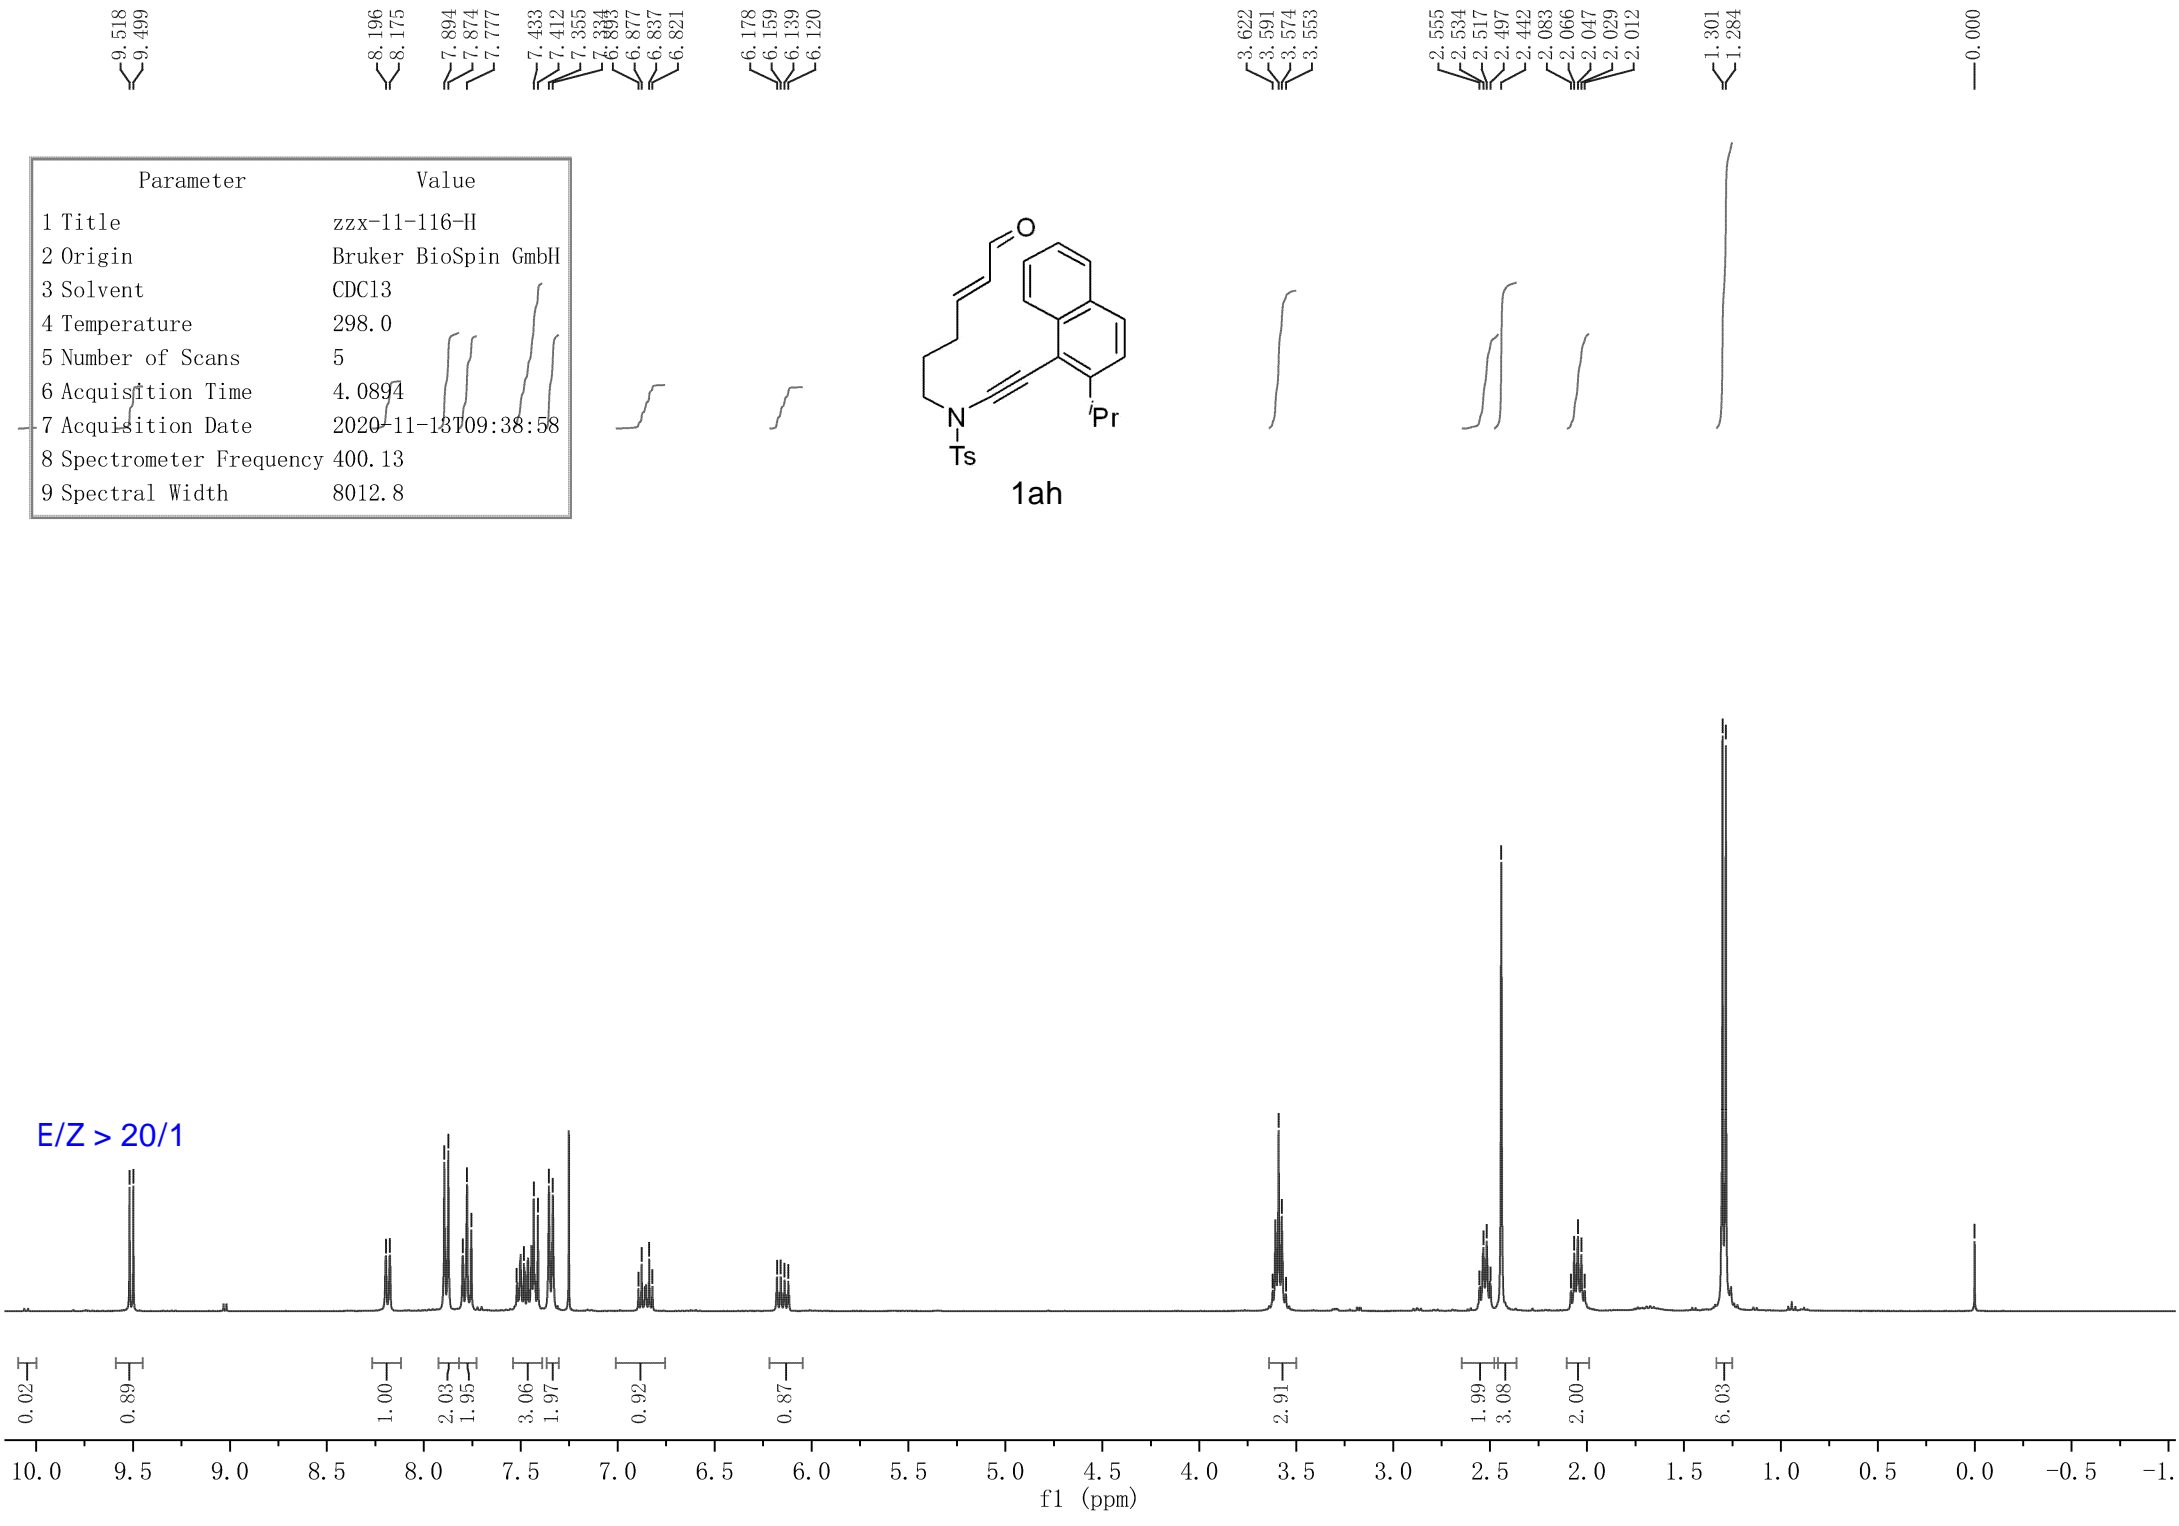

| Parameter                | Value               |
|--------------------------|---------------------|
| 1 Title                  | zzx-11-116-C        |
| 2 Origin                 | Bruker BioSpin GmbH |
| 3 Solvent                | CDC13               |
| 4 Temperature            | 300.0               |
| 5 Number of Scans        | 43                  |
| 6 Acquisition Time       | 1.3631              |
| 7 Acquisition Date       | 2020-11-13T09:40:04 |
| 8 Spectrometer Frequency | 100.61              |
| 9 Spectral Width         | 24038.5             |

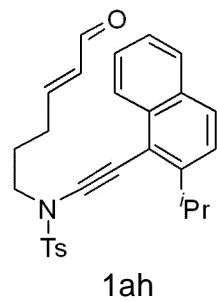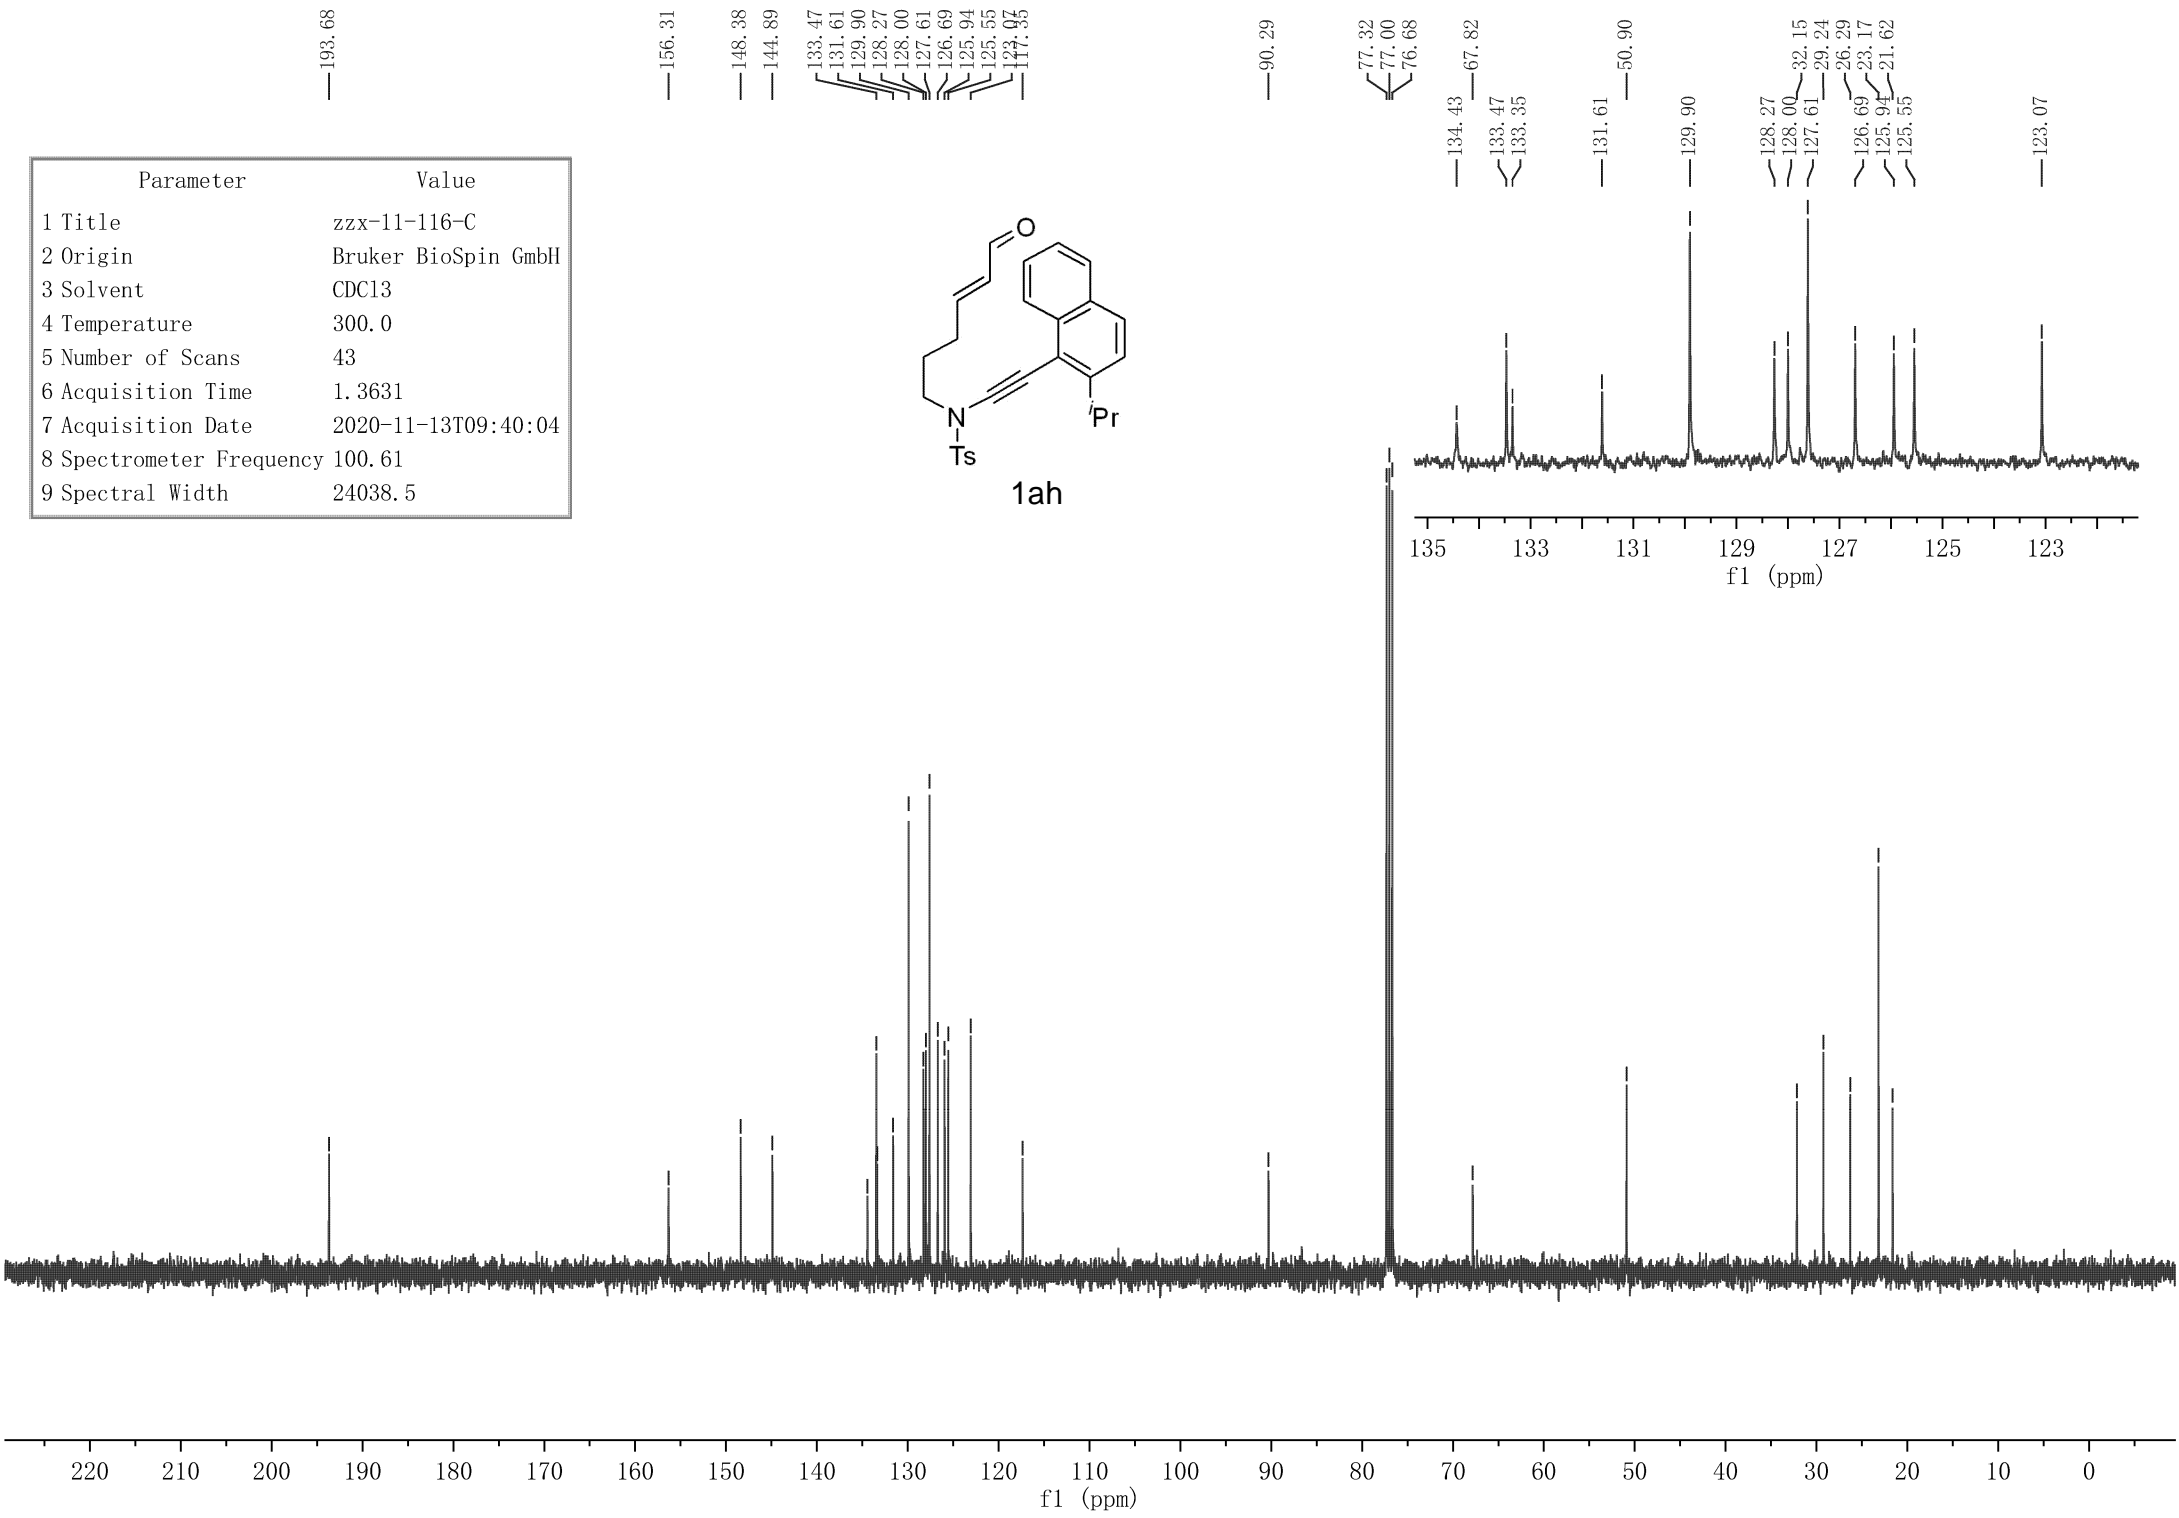

9.480  
9.460

8.383  
8.362

7.825  
7.804  
7.700  
7.680

7.587  
7.567  
7.472  
7.451

7.397  
7.271  
7.250  
7.214

6.698  
6.681  
6.658  
6.642

6.052  
6.029  
6.005

5.986

3.354  
3.337  
3.320

2.411  
2.293  
2.272  
2.252

2.235

1.686  
1.649  
1.631  
1.614

0.000

| Parameter                | Value               |
|--------------------------|---------------------|
| 1 Title                  | zzx-11-117-H        |
| 2 Origin                 | Bruker BioSpin GmbH |
| 3 Solvent                | CDC13               |
| 4 Temperature            | 298.0               |
| 5 Number of Scans        | 8                   |
| 6 Acquisition Time       | 4.0894              |
| 7 Acquisition Date       | 2020-11-13T09:46:08 |
| 8 Spectrometer Frequency | 400.13              |
| 9 Spectral Width         | 8012.8              |

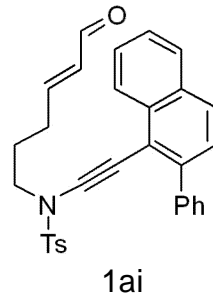

E/Z > 20/1

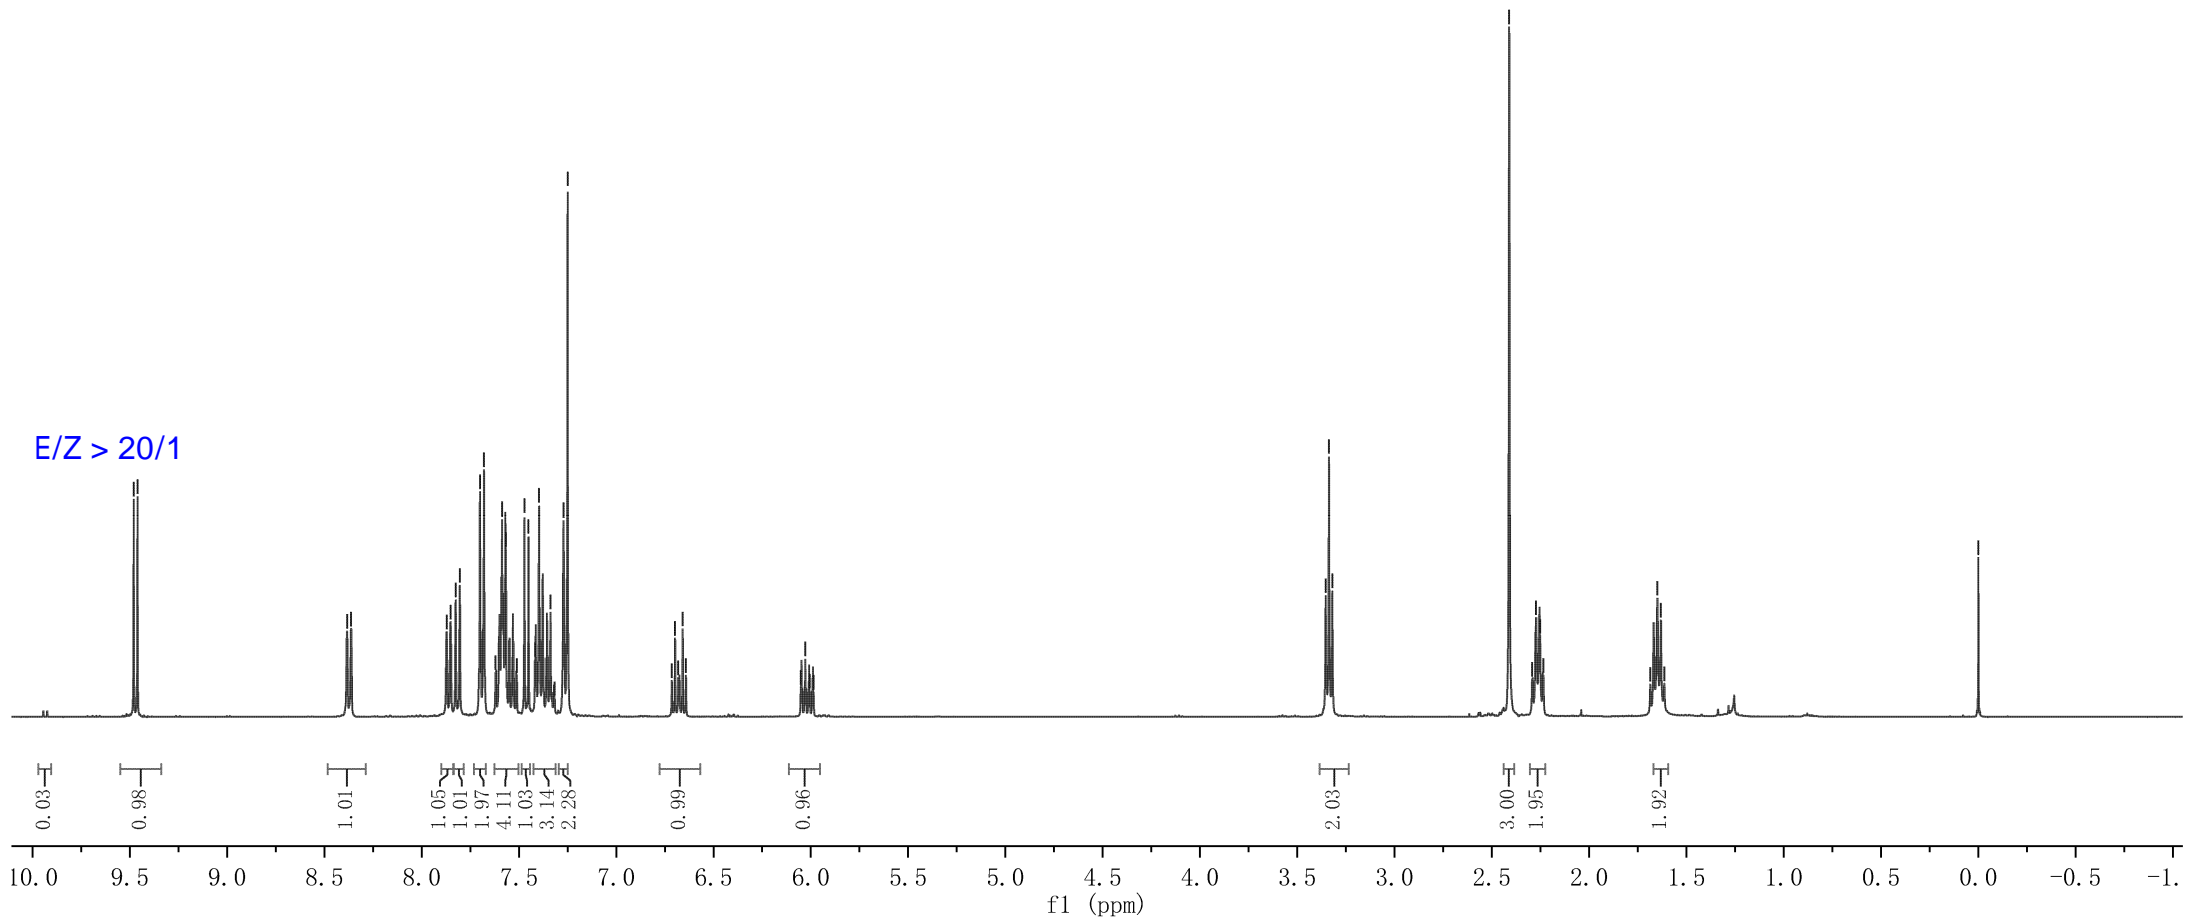

| Parameter                | Value               |
|--------------------------|---------------------|
| 1 Title                  | zxx-11-117-C        |
| 2 Origin                 | Bruker BioSpin GmbH |
| 3 Solvent                | CDC13               |
| 4 Temperature            | 300.0               |
| 5 Number of Scans        | 37                  |
| 6 Acquisition Time       | 1.3631              |
| 7 Acquisition Date       | 2020-11-13T09:47:14 |
| 8 Spectrometer Frequency | 100.61              |
| 9 Spectral Width         | 24038.5             |

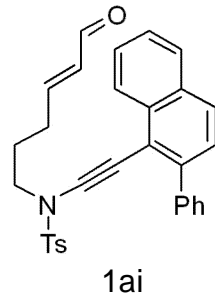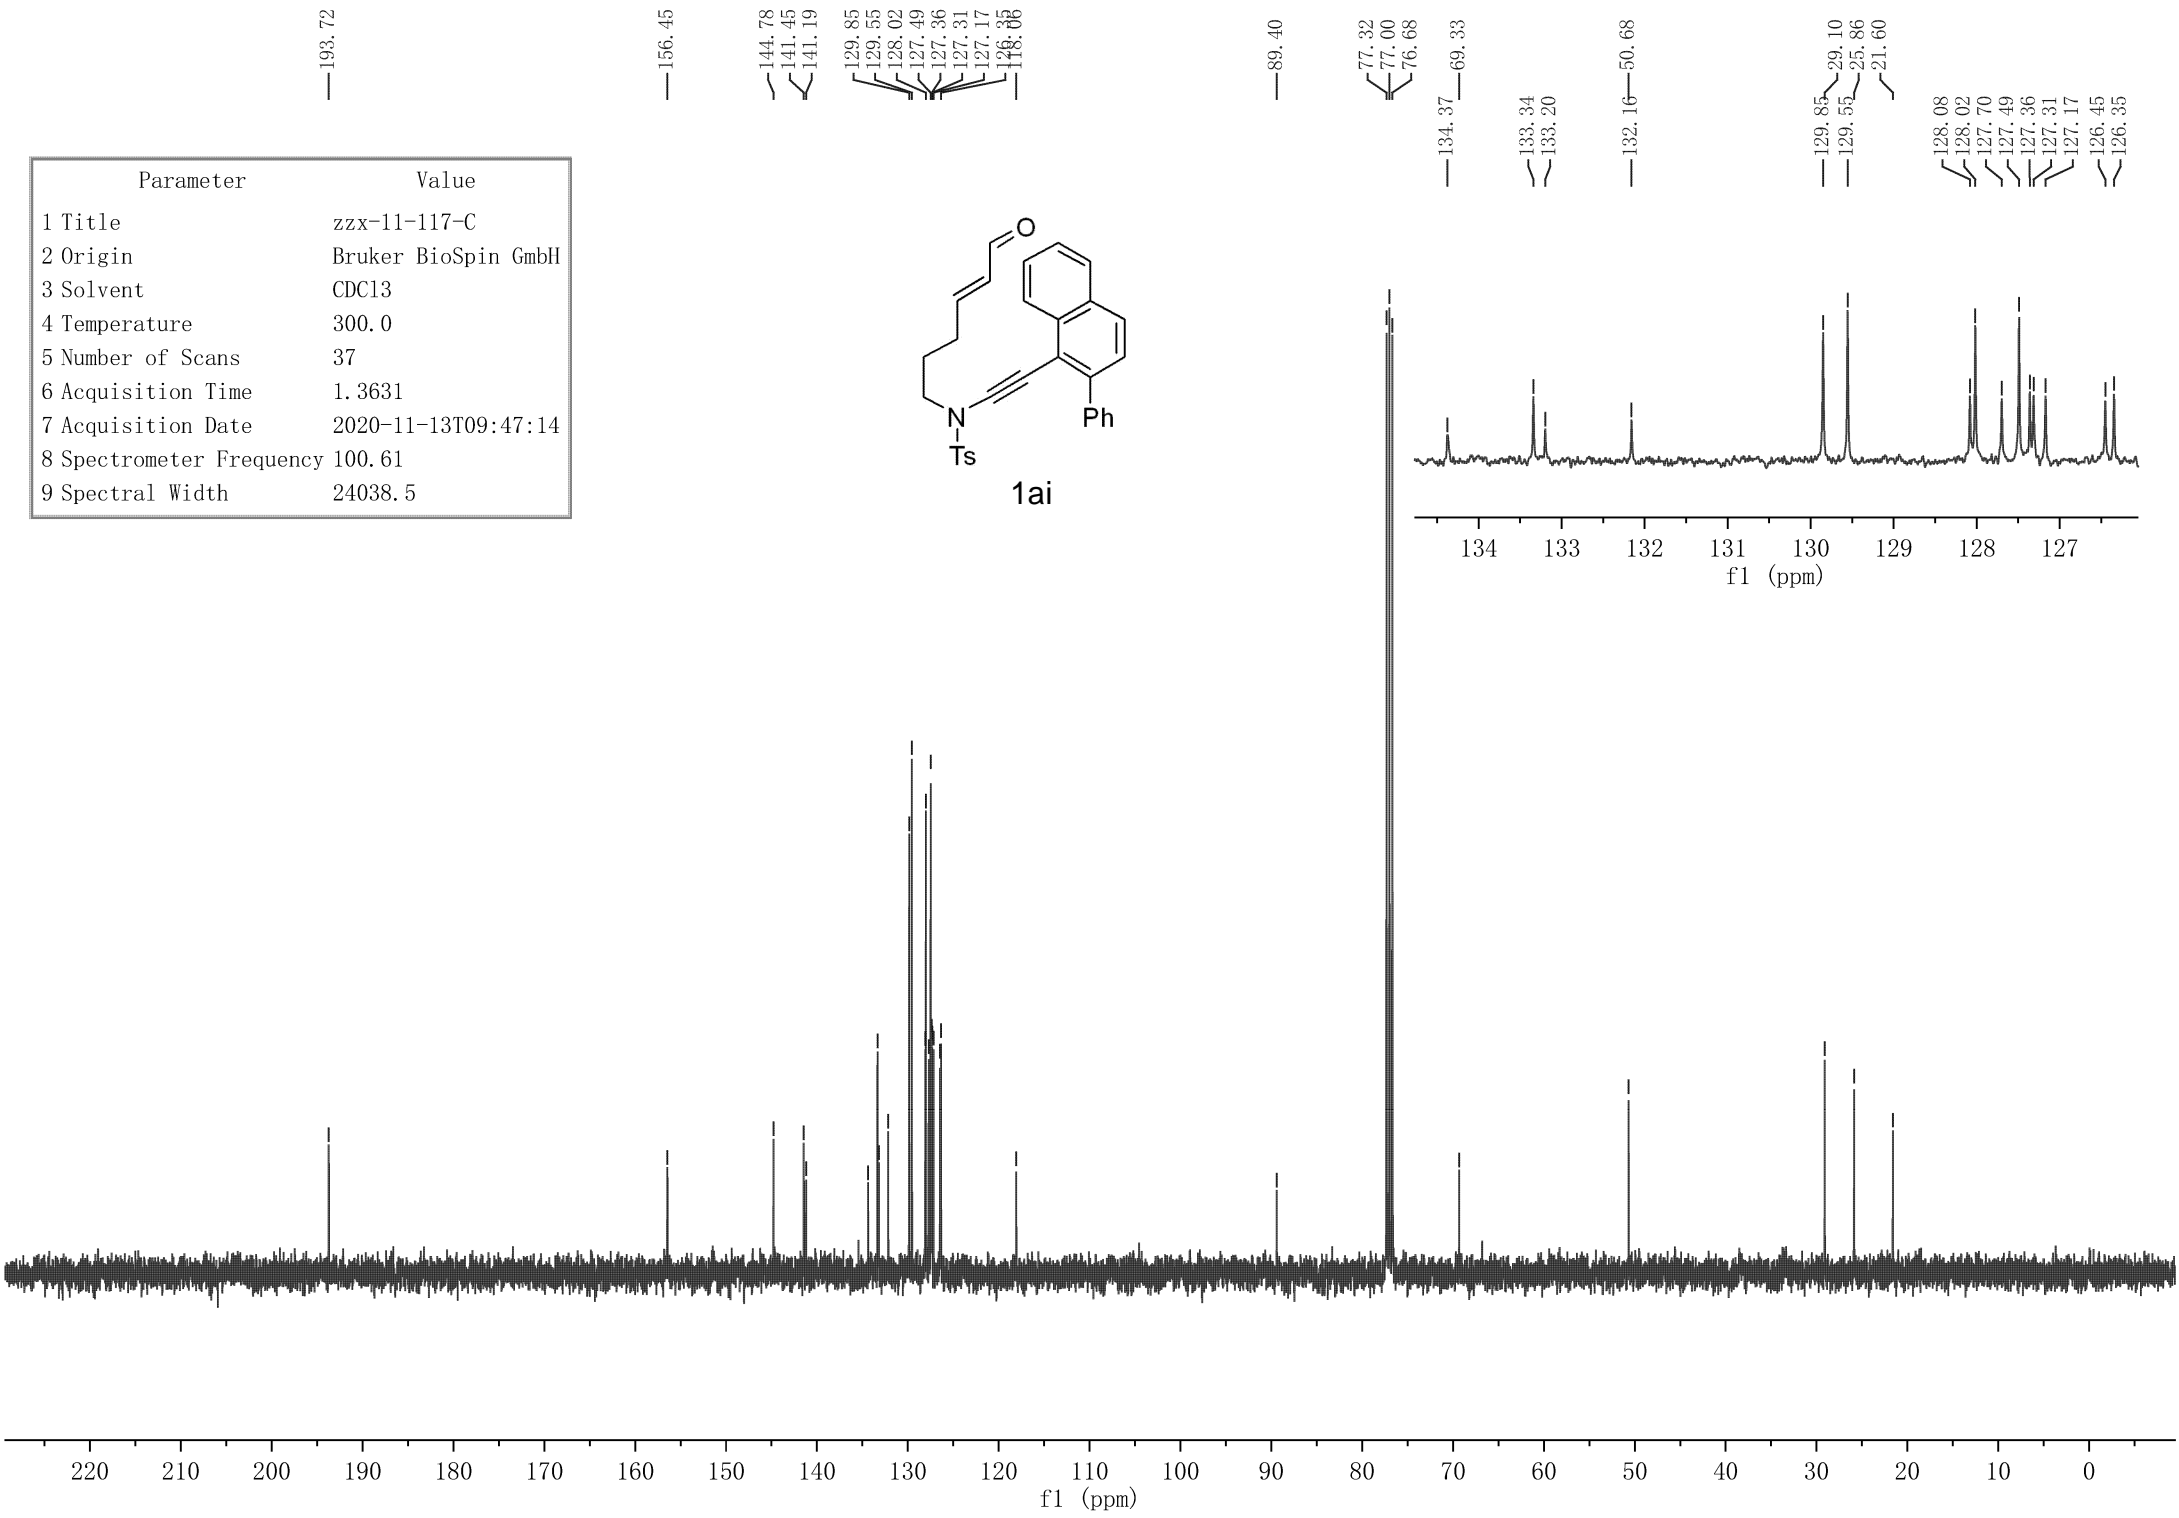

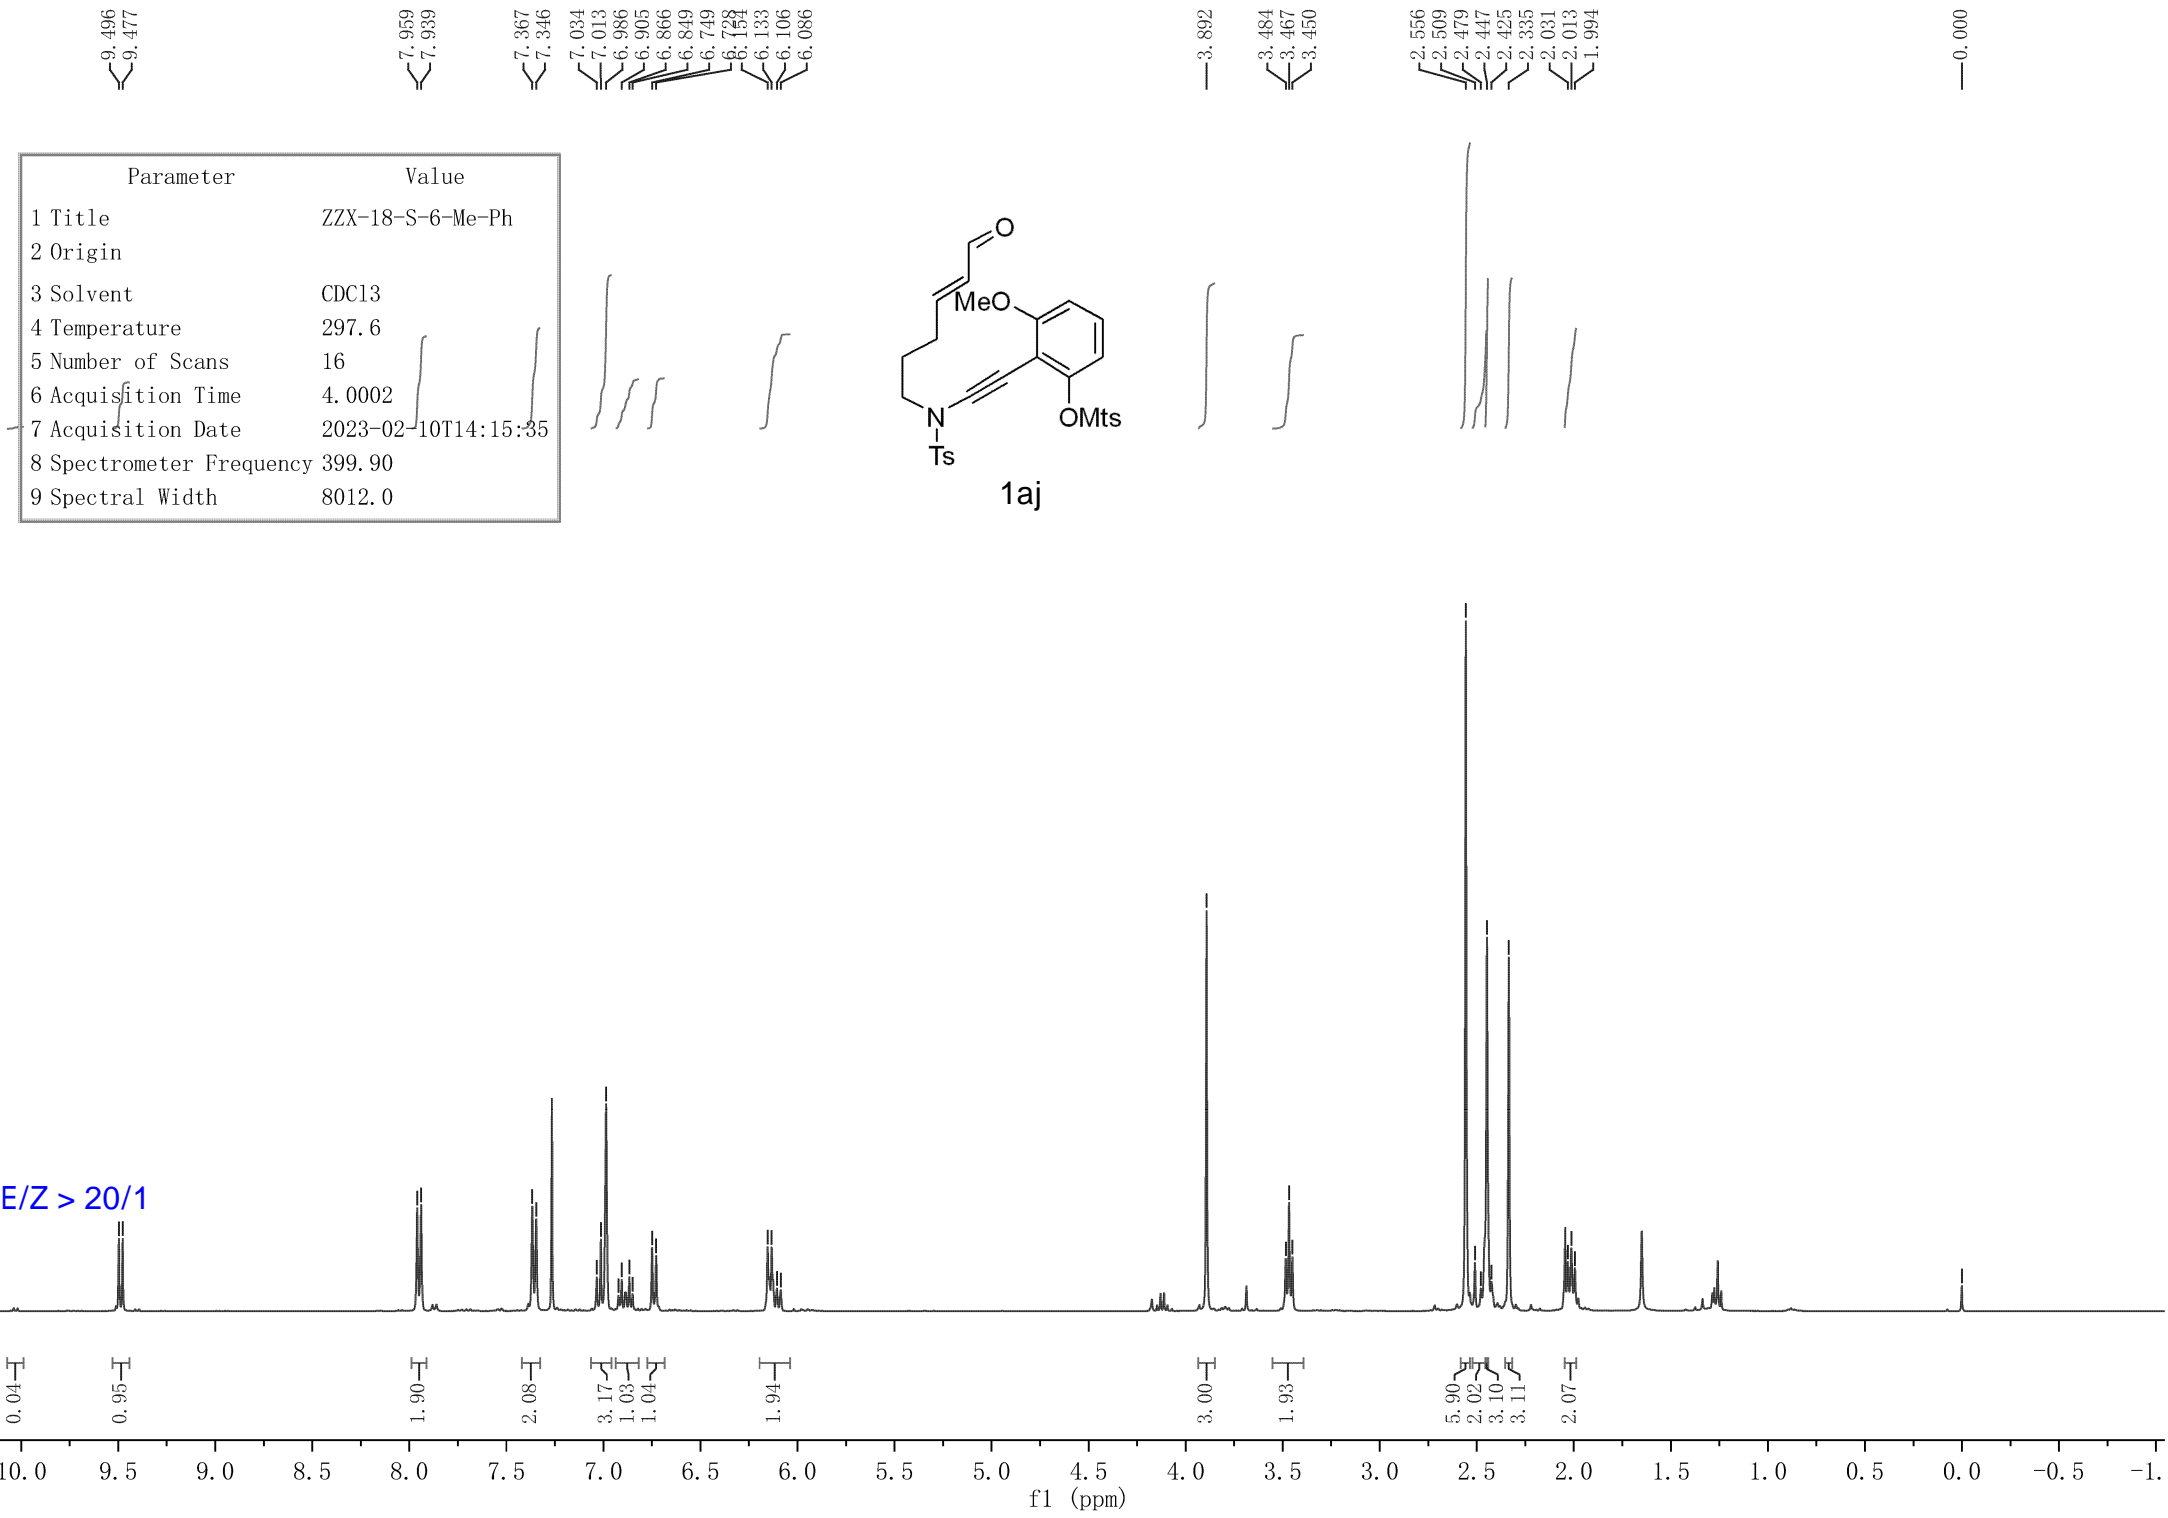

| Parameter                | Value               |
|--------------------------|---------------------|
| 1 Title                  | ZZX-18-S-6-Me-Ph    |
| 2 Origin                 |                     |
| 3 Solvent                | CDC13               |
| 4 Temperature            | 297.6               |
| 5 Number of Scans        | 500                 |
| 6 Acquisition Time       | 1.0000              |
| 7 Acquisition Date       | 2023-02-10T14:34:51 |
| 8 Spectrometer Frequency | 100.56              |
| 9 Spectral Width         | 26041.0             |

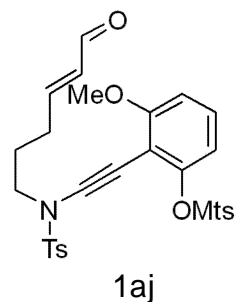

194.09  
 160.97  
 157.44  
 150.35  
 144.59  
 143.77  
 140.16  
 134.59  
 133.32  
 131.79  
 131.73  
 129.76  
 128.20  
 127.77  
 112.77  
 108.81  
 108.43  
 90.89  
 77.32  
 77.00  
 76.68  
 62.70  
 56.20  
 51.00  
 29.40  
 25.93  
 22.70  
 21.63  
 21.10

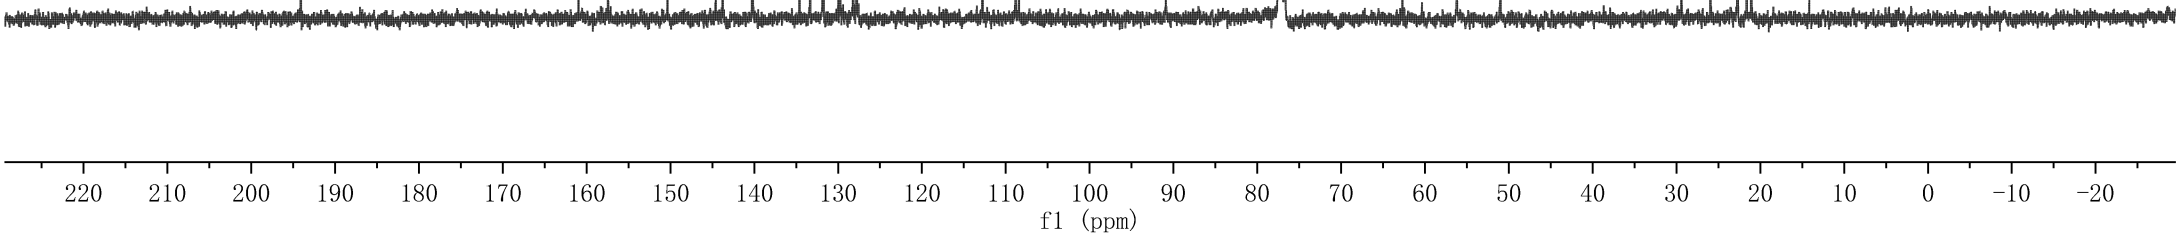

7.859  
7.851  
7.842  
7.828  
7.768  
7.757  
7.746  
7.479  
7.462  
7.443  
7.426  
7.221  
7.184  
7.162  
7.145  
7.127  
7.039  
7.019  
6.886

4.070  
4.050  
4.038  
4.007  
3.816  
3.796  
3.775  
3.743

2.484  
2.463  
2.444  
2.422  
2.404  
2.353  
2.340  
2.333  
2.324  
2.303

— 0.000

| Parameter                | Value               |
|--------------------------|---------------------|
| 1 Title                  | ZZX-11-62-H         |
| 2 Origin                 | Bruker BioSpin GmbH |
| 3 Solvent                | CDC13               |
| 4 Temperature            | 298.0               |
| 5 Number of Scans        | 5                   |
| 6 Acquisition Time       | 4.0894              |
| 7 Acquisition Date       | 2020-10-31 17:36:35 |
| 8 Spectrometer Frequency | 400.13              |
| 9 Spectral Width         | 8012.8              |

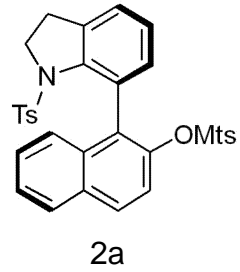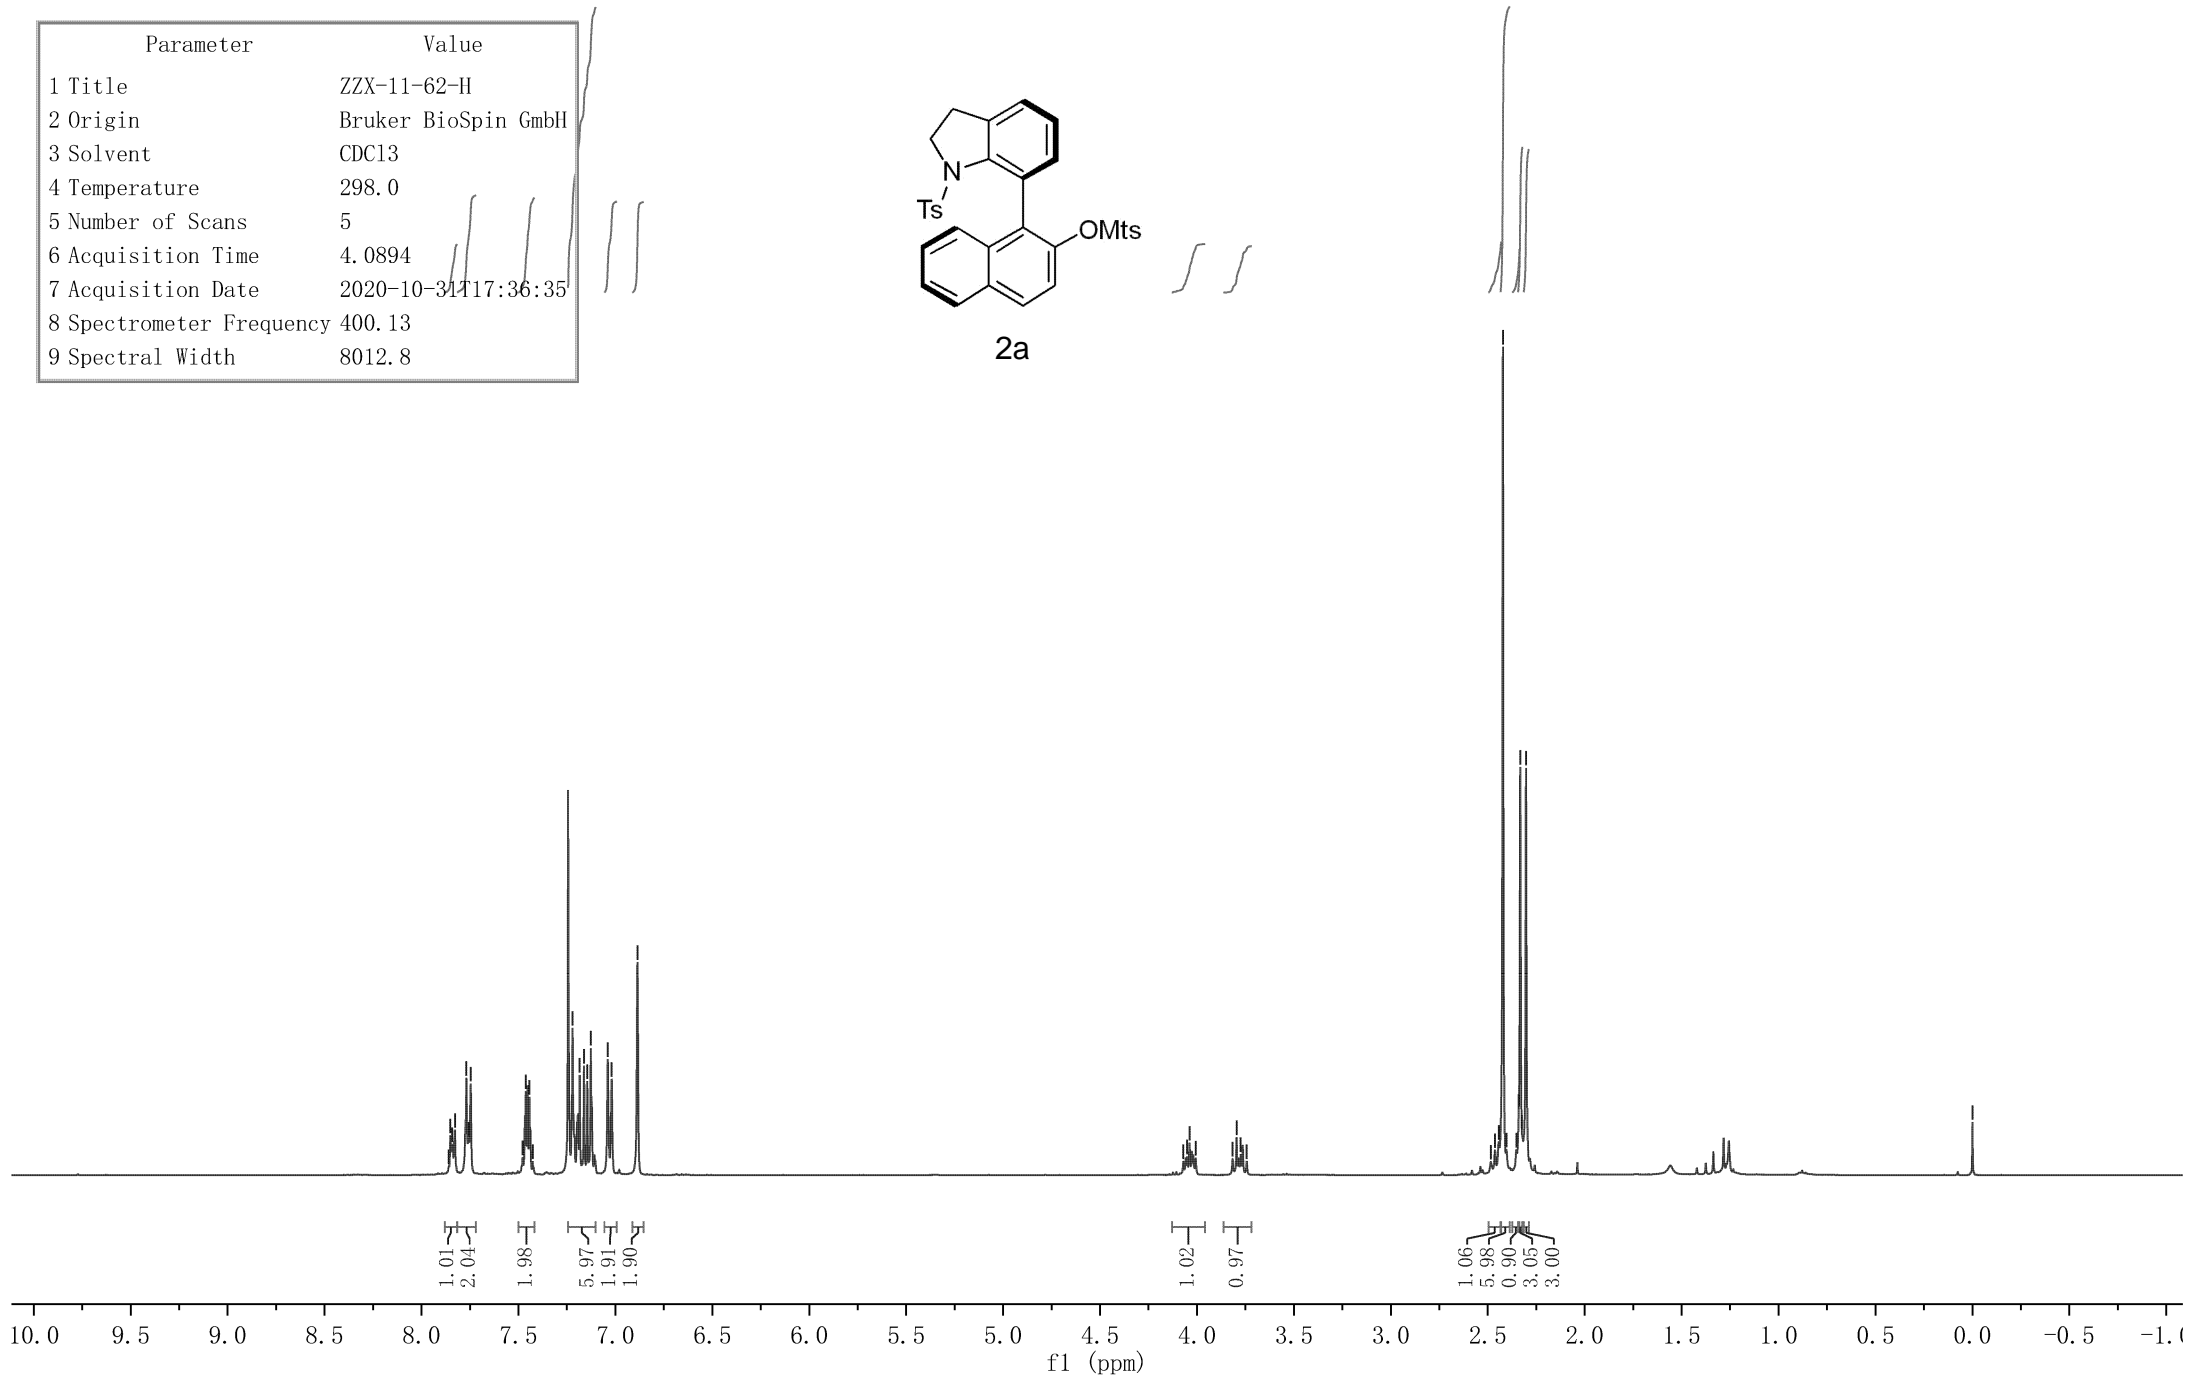

| Parameter                | Value               |
|--------------------------|---------------------|
| 1 Title                  | ZZX-11-62-C-1       |
| 2 Origin                 | Bruker BioSpin GmbH |
| 3 Solvent                | CDC13               |
| 4 Temperature            | 300.0               |
| 5 Number of Scans        | 24                  |
| 6 Acquisition Time       | 1.3631              |
| 7 Acquisition Date       | 2020-10-31T17:39:29 |
| 8 Spectrometer Frequency | 100.61              |
| 9 Spectral Width         | 24038.5             |

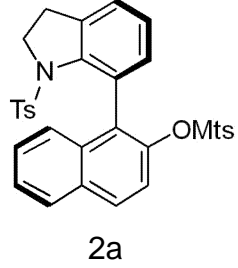

144.36  
143.36  
143.19  
141.87  
139.78  
137.58  
135.45  
132.92  
132.47  
131.94  
131.87  
131.62  
130.15  
129.13  
128.05  
127.65  
127.11  
126.50  
126.44  
126.02  
125.65  
124.47  
119.88

77.32  
77.00  
76.68

132.92  
132.47  
131.94  
131.87  
131.62

52.25

130.15

129.13

29.31  
128.05  
127.65  
127.11  
22.61  
21.48  
21.01

126.50  
126.44  
126.02  
125.65

124.47

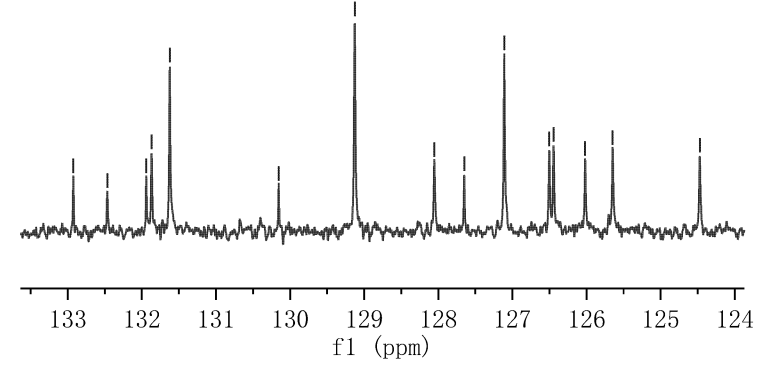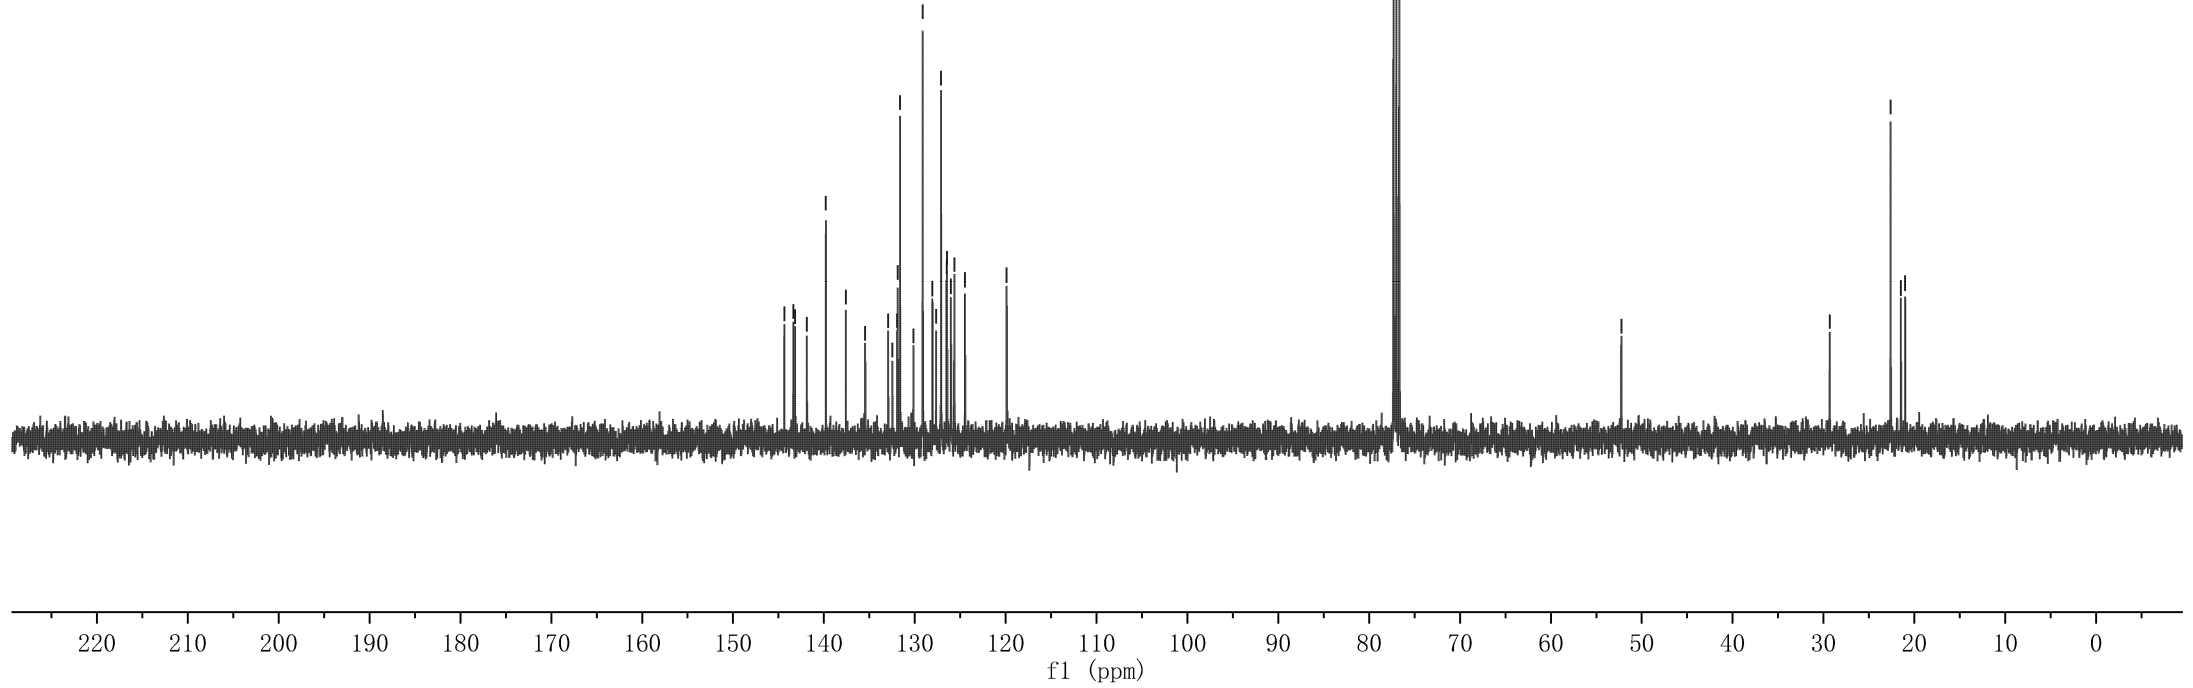



| Parameter                | Value               |
|--------------------------|---------------------|
| 1 Title                  | ZZX-11-62-DEPT      |
| 2 Origin                 | Bruker BioSpin GmbH |
| 3 Solvent                | CDC13               |
| 4 Temperature            | 300.0               |
| 5 Number of Scans        | 21                  |
| 6 Acquisition Time       | 1.3631              |
| 7 Acquisition Date       | 2020-10-31T17:42:02 |
| 8 Spectrometer Frequency | 100.61              |
| 9 Spectral Width         | 24038.5             |

131.87  
131.63  
129.13  
128.06  
127.11  
126.51  
126.45  
126.02  
125.65  
124.47  
119.89

52.25

29.31  
22.61  
21.48  
21.01

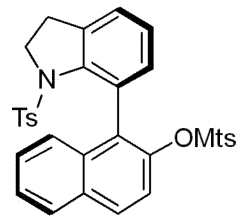

2a

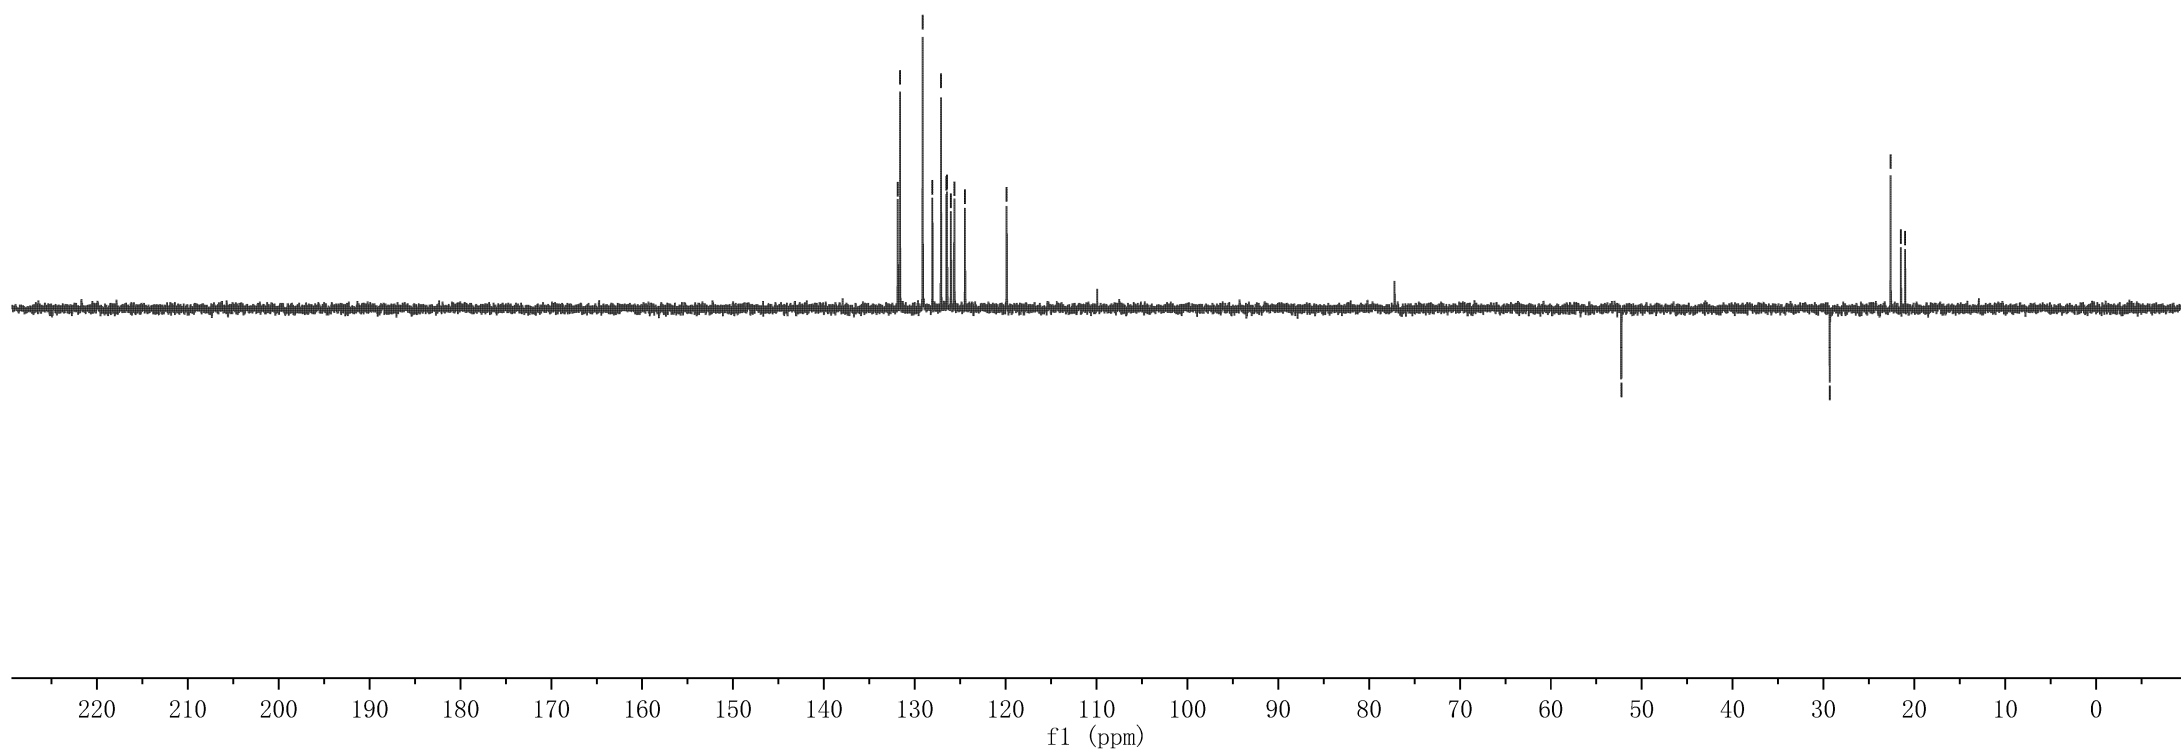

7.853  
7.847  
7.840  
7.830  
7.773  
7.761  
7.751  
7.738  
7.479  
7.467  
7.452  
7.425  
7.310  
7.303  
7.281  
7.273  
7.227  
7.167  
7.136  
7.114  
6.894  
6.726  
6.719  
6.696  
6.689

4.049  
4.017  
3.998  
3.970  
3.872  
3.851  
3.819  
3.791  
3.767

2.538  
2.492  
2.455  
2.431  
2.380  
2.364  
2.345  
2.331  
2.309

— 0.000

| Parameter                | Value               |
|--------------------------|---------------------|
| 1 Title                  | ZZX-18-46           |
| 2 Origin                 |                     |
| 3 Solvent                | CDC13               |
| 4 Temperature            | 297.2               |
| 5 Number of Scans        | 16                  |
| 6 Acquisition Time       | 4.0002              |
| 7 Acquisition Date       | 2023-02-10T13:51:26 |
| 8 Spectrometer Frequency | 399.90              |
| 9 Spectral Width         | 8012.0              |

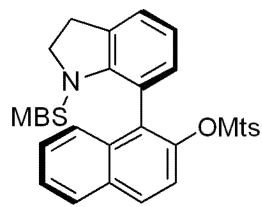

2b

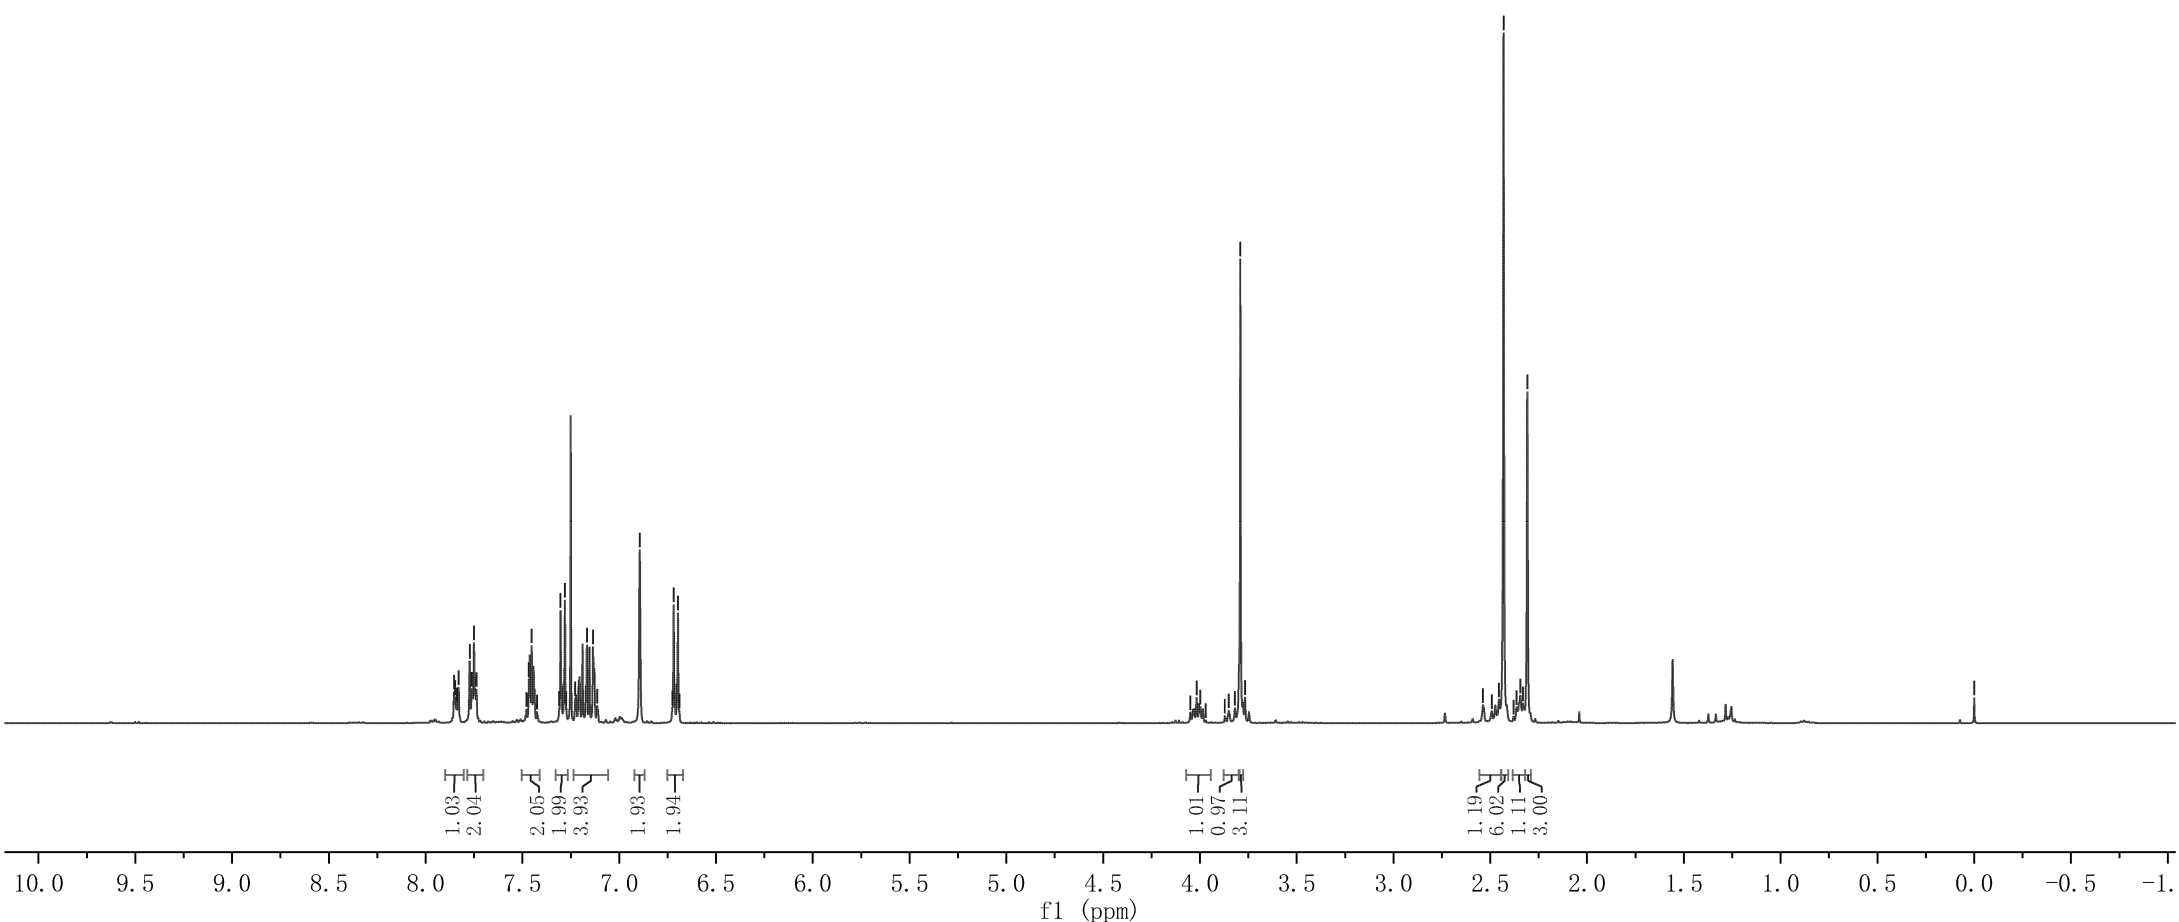

| Parameter                | Value               |
|--------------------------|---------------------|
| 1 Title                  | ZZX-18-46           |
| 2 Origin                 |                     |
| 3 Solvent                | CDC13               |
| 4 Temperature            | 297.0               |
| 5 Number of Scans        | 500                 |
| 6 Acquisition Time       | 1.0000              |
| 7 Acquisition Date       | 2023-02-10T14:10:36 |
| 8 Spectrometer Frequency | 100.56              |
| 9 Spectral Width         | 26041.0             |



2b

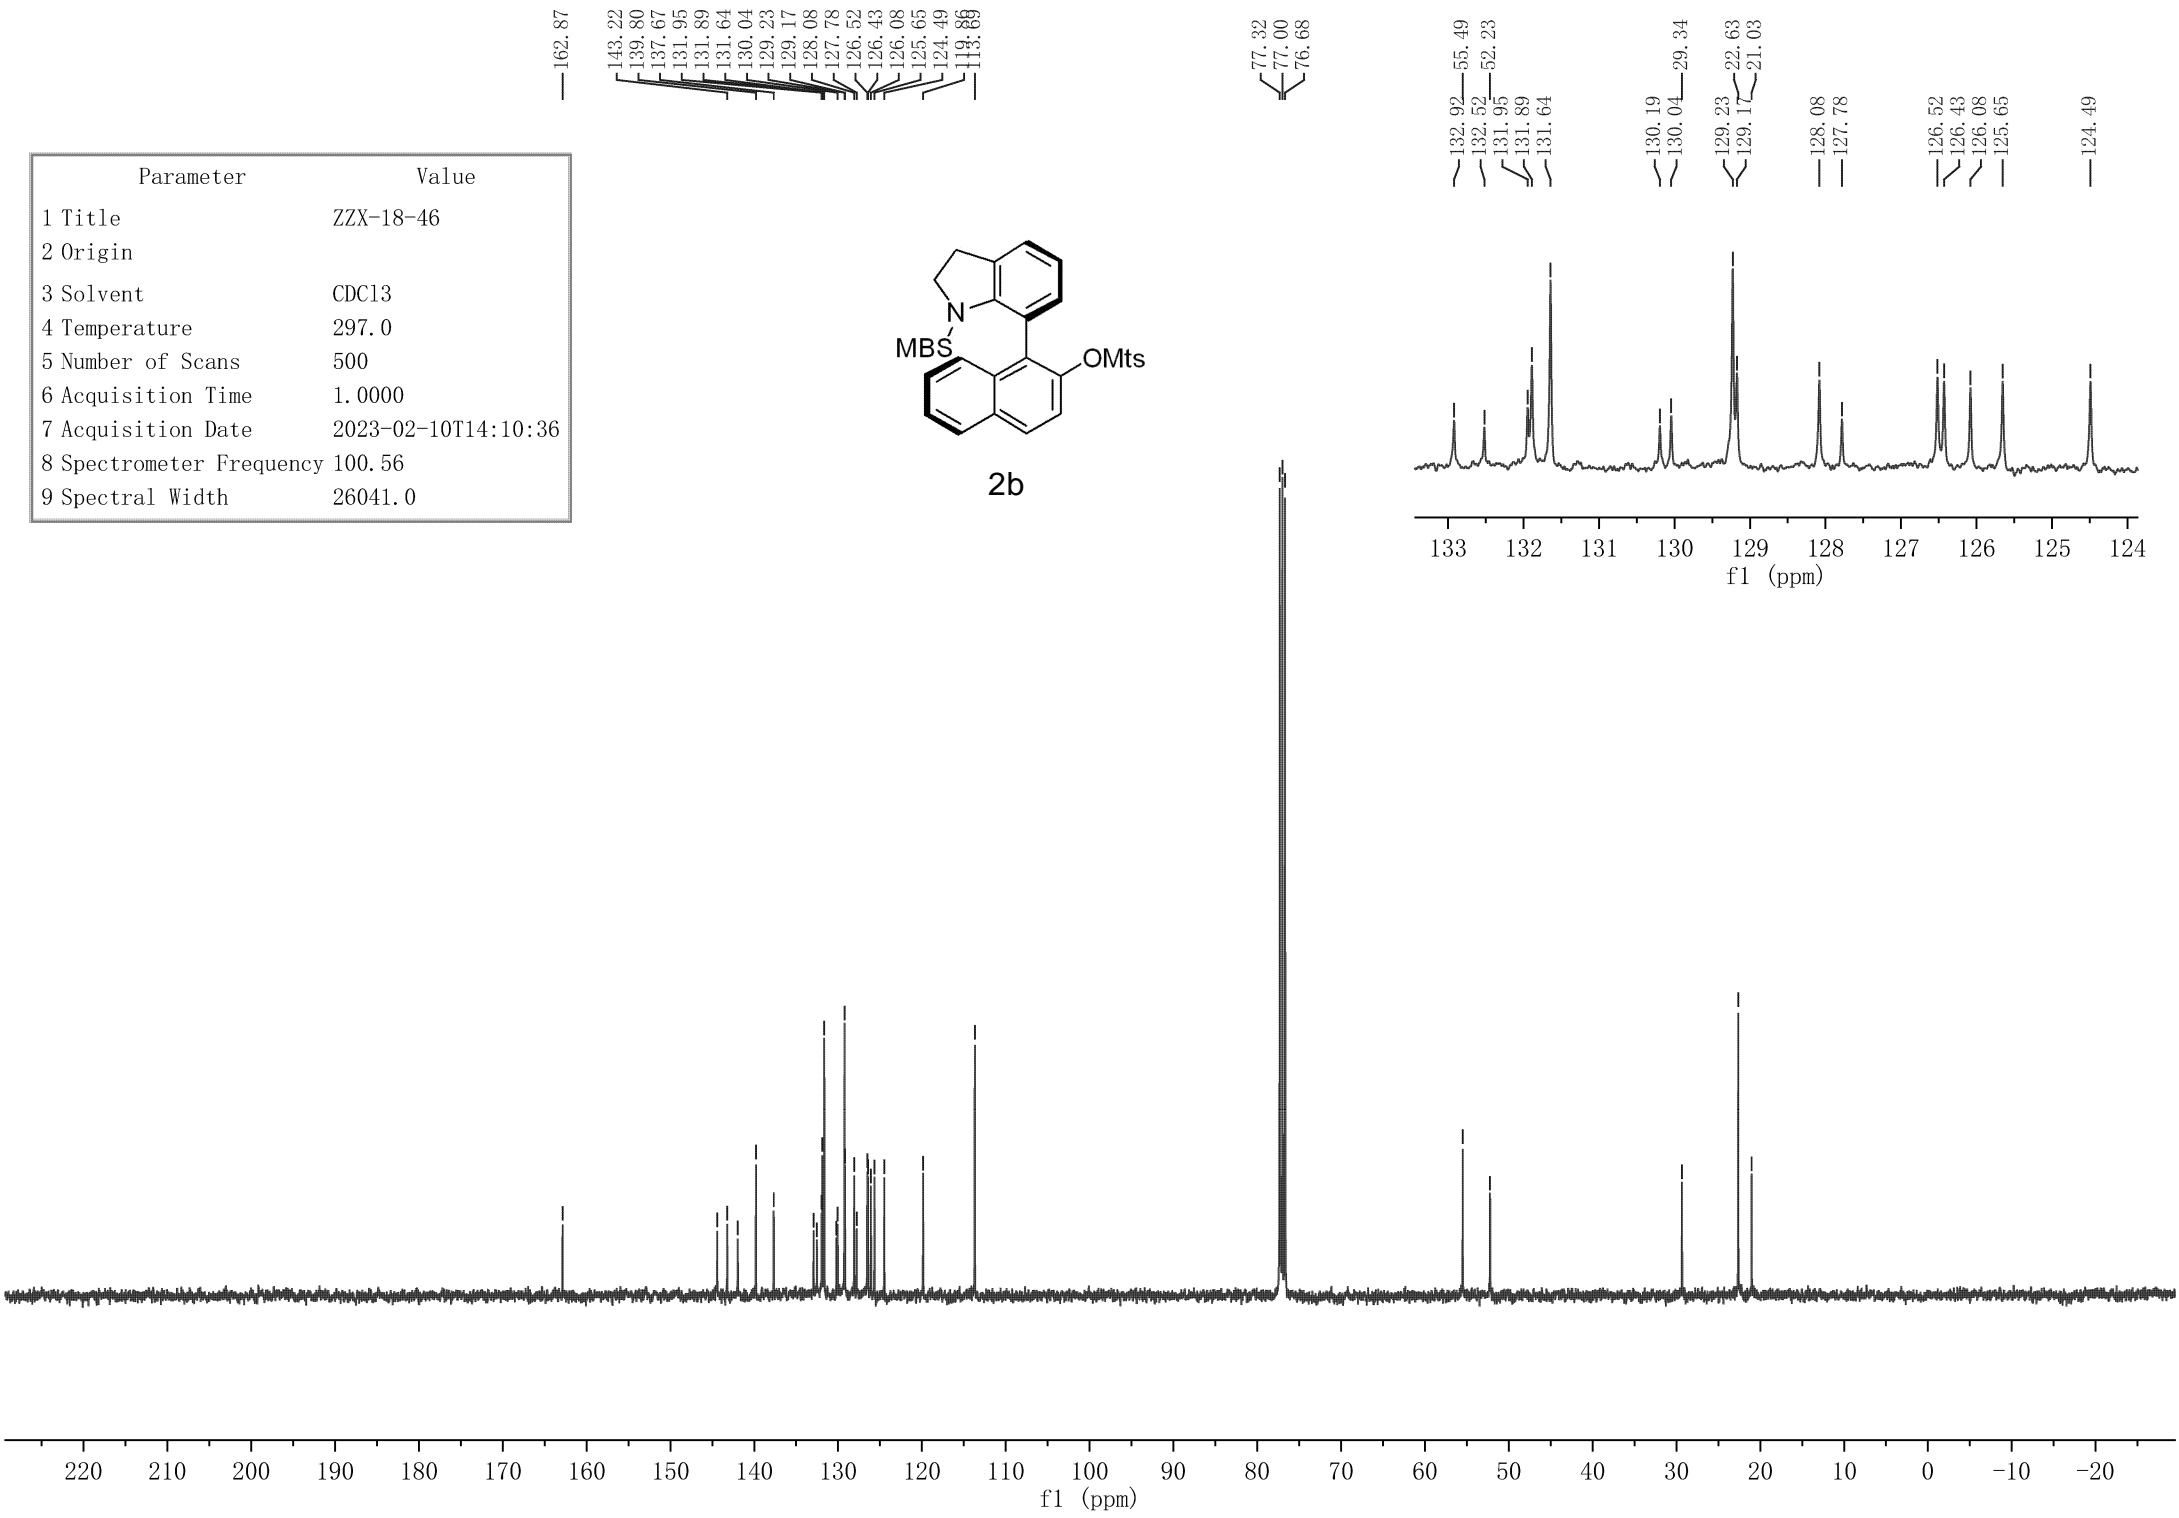

7.803  
7.782  
7.736  
7.715  
7.479  
7.456  
7.286  
7.267  
7.007  
6.948  
6.925  
6.804  
6.796  
6.439

4.474  
4.455  
4.446  
4.426

3.672  
3.643  
3.625  
3.596  
3.358  
3.320  
3.300  
3.273  
2.792  
2.775  
2.754  
2.736

2.288  
2.251  
2.150  
2.004

0.000

| Parameter                | Value               |
|--------------------------|---------------------|
| 1 Title                  | ZZX-11-140          |
| 2 Origin                 |                     |
| 3 Solvent                | CDC13               |
| 4 Temperature            | 297.1               |
| 5 Number of Scans        | 16                  |
| 6 Acquisition Time       | 4.0002              |
| 7 Acquisition Date       | 2022-03-18T23:11:00 |
| 8 Spectrometer Frequency | 399.93              |
| 9 Spectral Width         | 8012.0              |

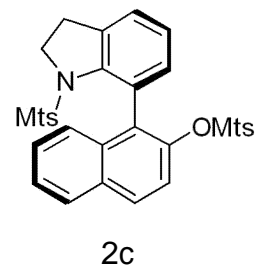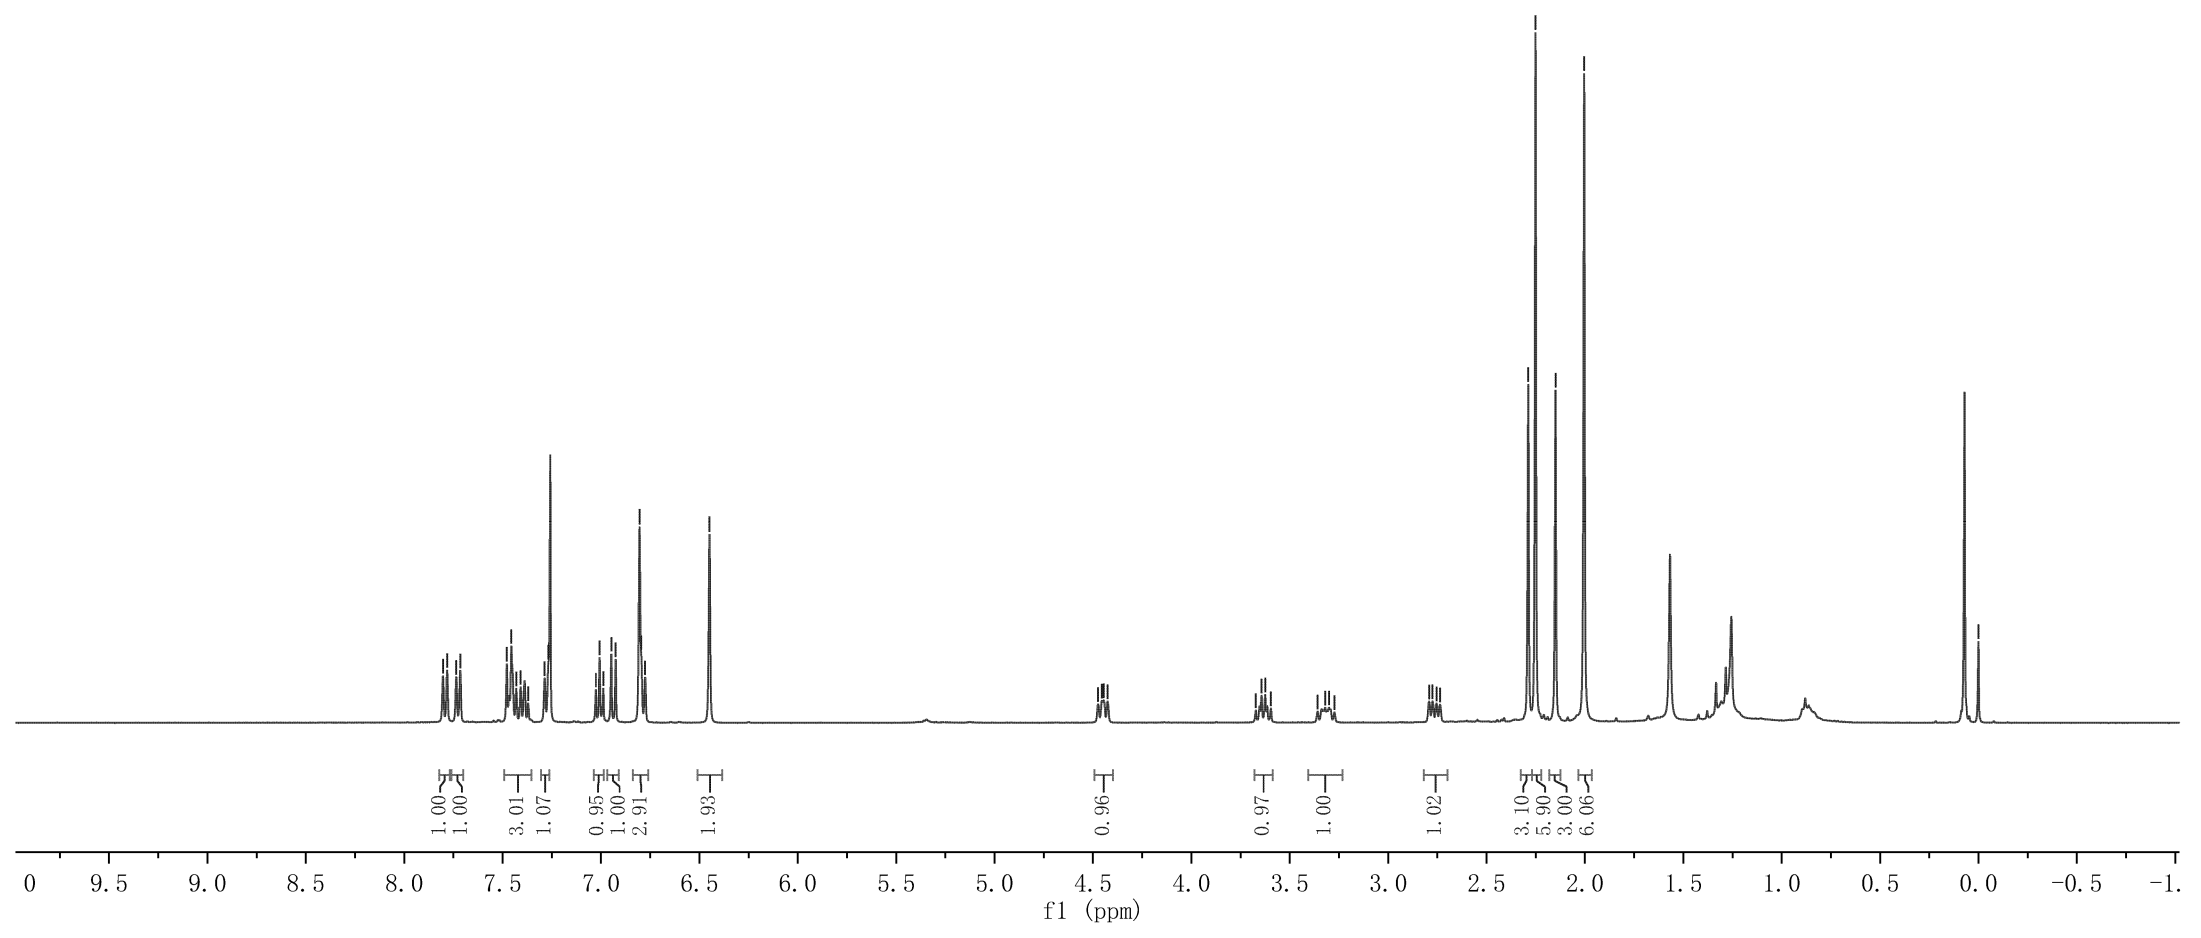

| Parameter                | Value               |
|--------------------------|---------------------|
| 1 Title                  | ZZX-11-140          |
| 2 Origin                 |                     |
| 3 Solvent                | CDC13               |
| 4 Temperature            | 296.6               |
| 5 Number of Scans        | 1024                |
| 6 Acquisition Time       | 1.0000              |
| 7 Acquisition Date       | 2022-03-18T23:45:41 |
| 8 Spectrometer Frequency | 100.56              |
| 9 Spectral Width         | 26041.0             |

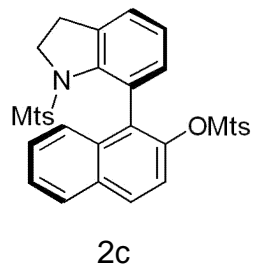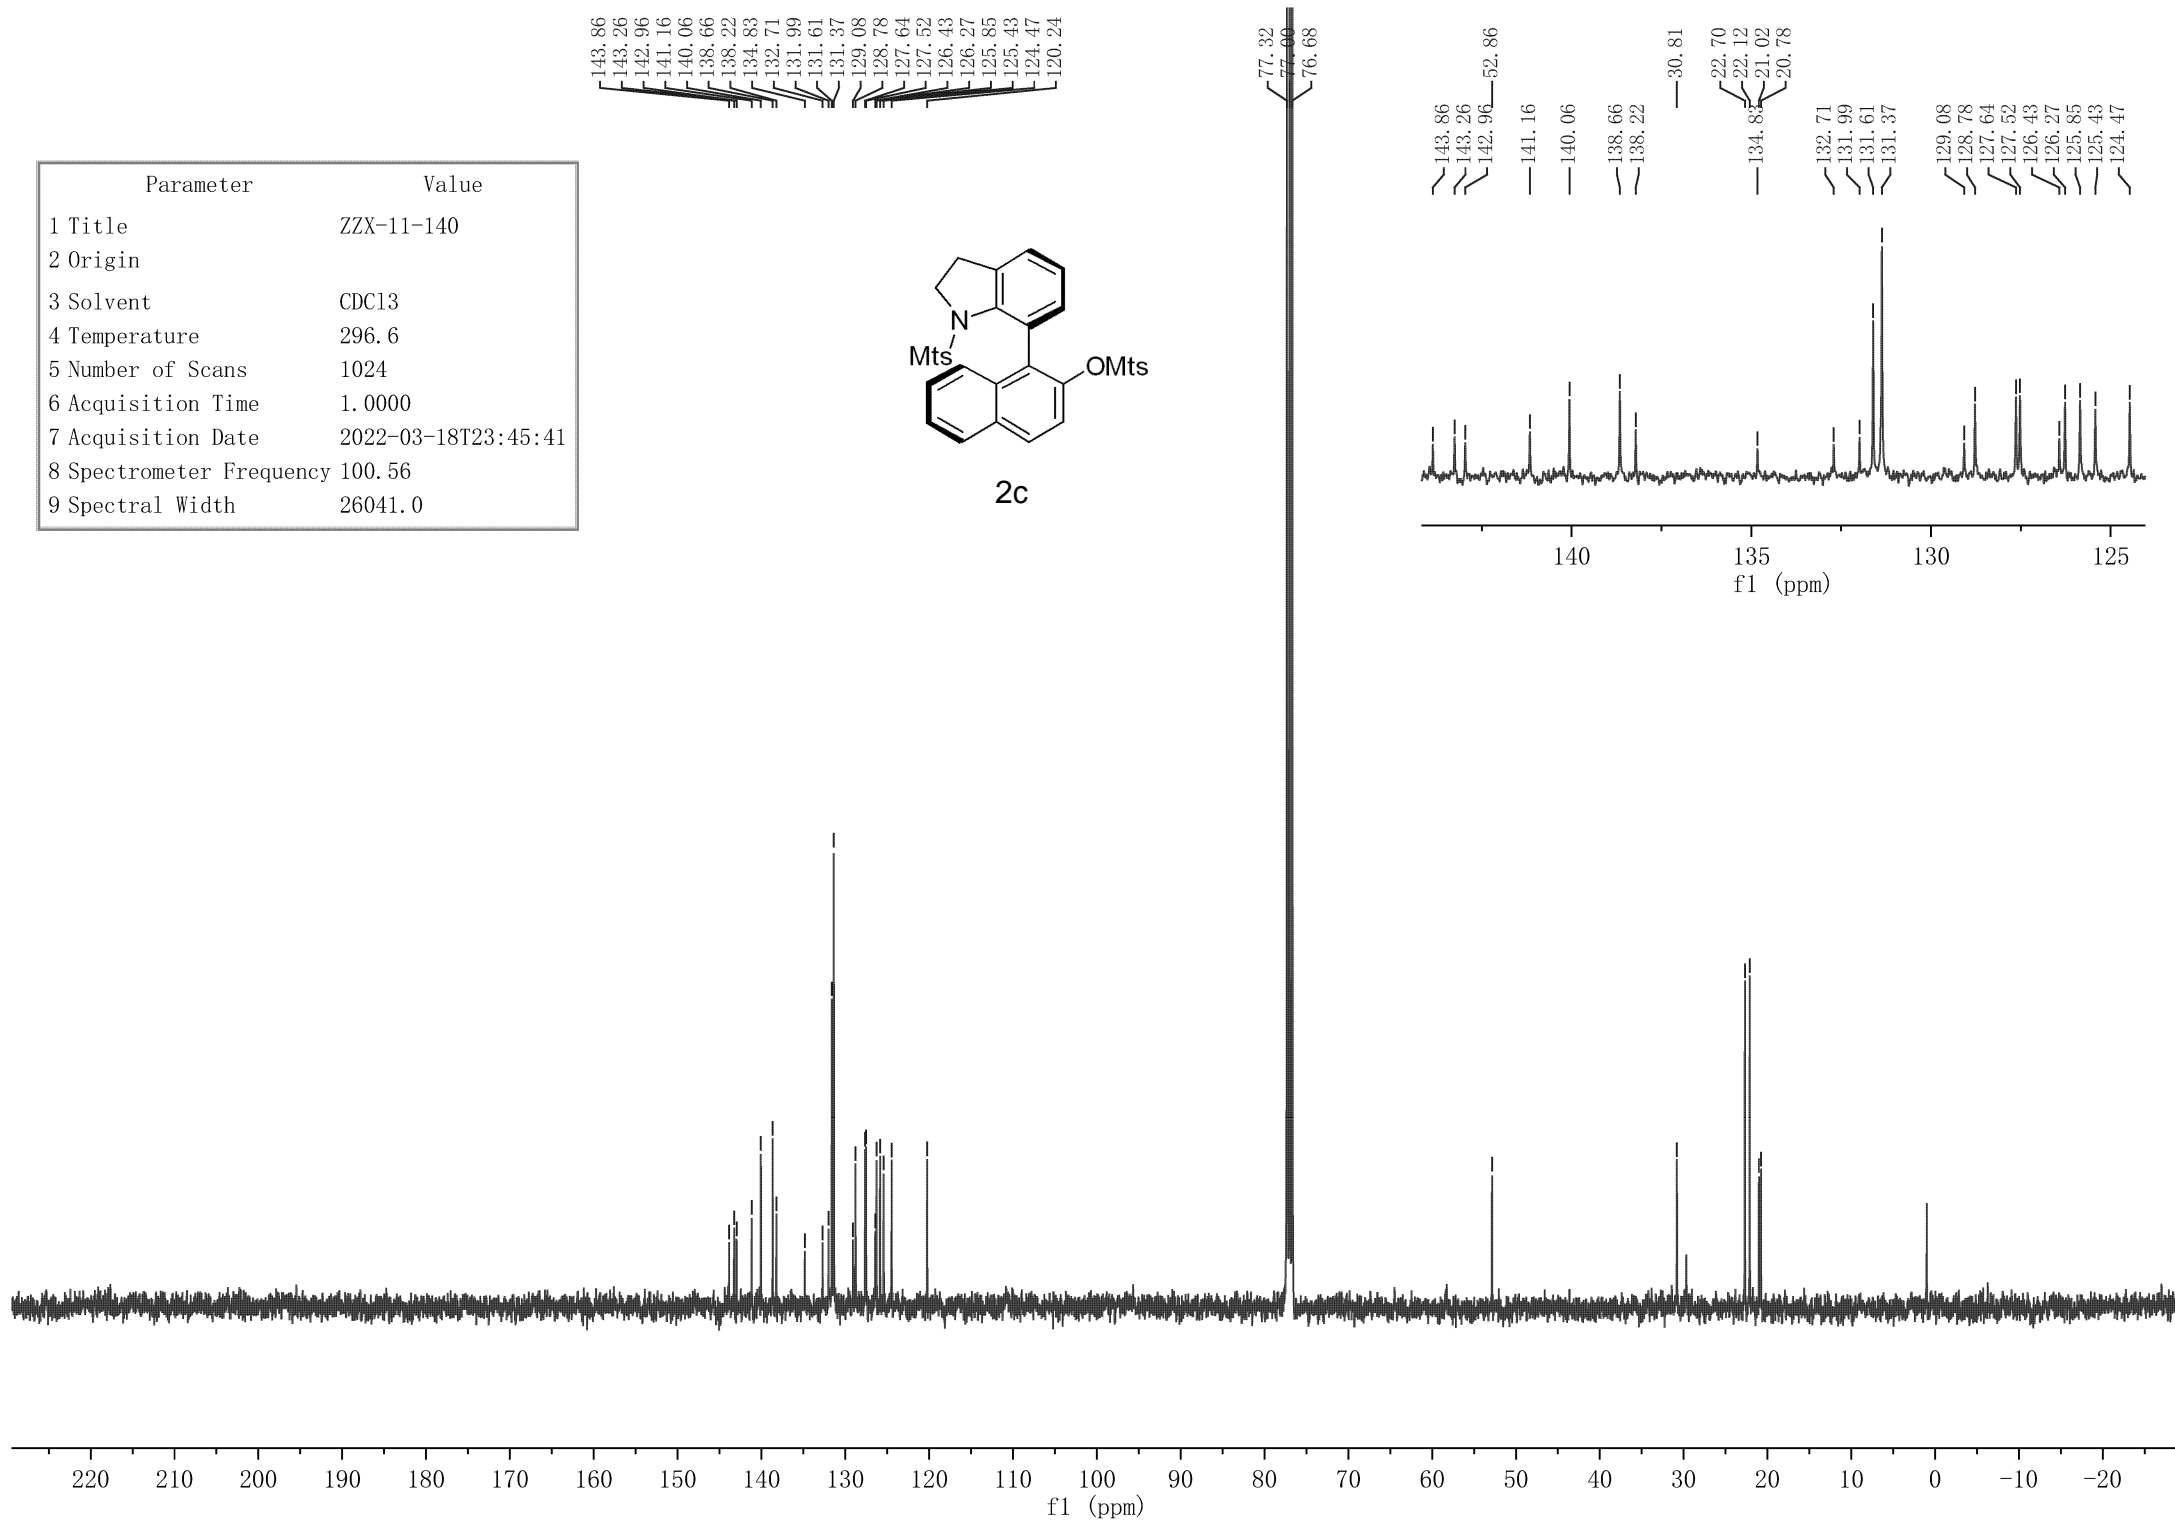

| Parameter                | Value               |
|--------------------------|---------------------|
| 1 Title                  | zzx-12-125-H        |
| 2 Origin                 | Bruker BioSpin GmbH |
| 3 Solvent                | CDC13               |
| 4 Temperature            | 298.0               |
| 5 Number of Scans        | 6                   |
| 6 Acquisition Time       | 4.0894              |
| 7 Acquisition Date       | 2021-01-29T16:30:50 |
| 8 Spectrometer Frequency | 400.13              |
| 9 Spectral Width         | 8012.8              |

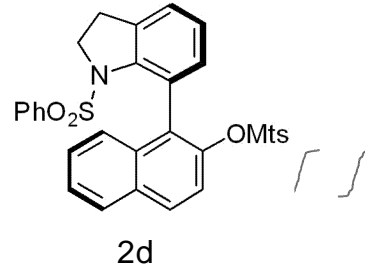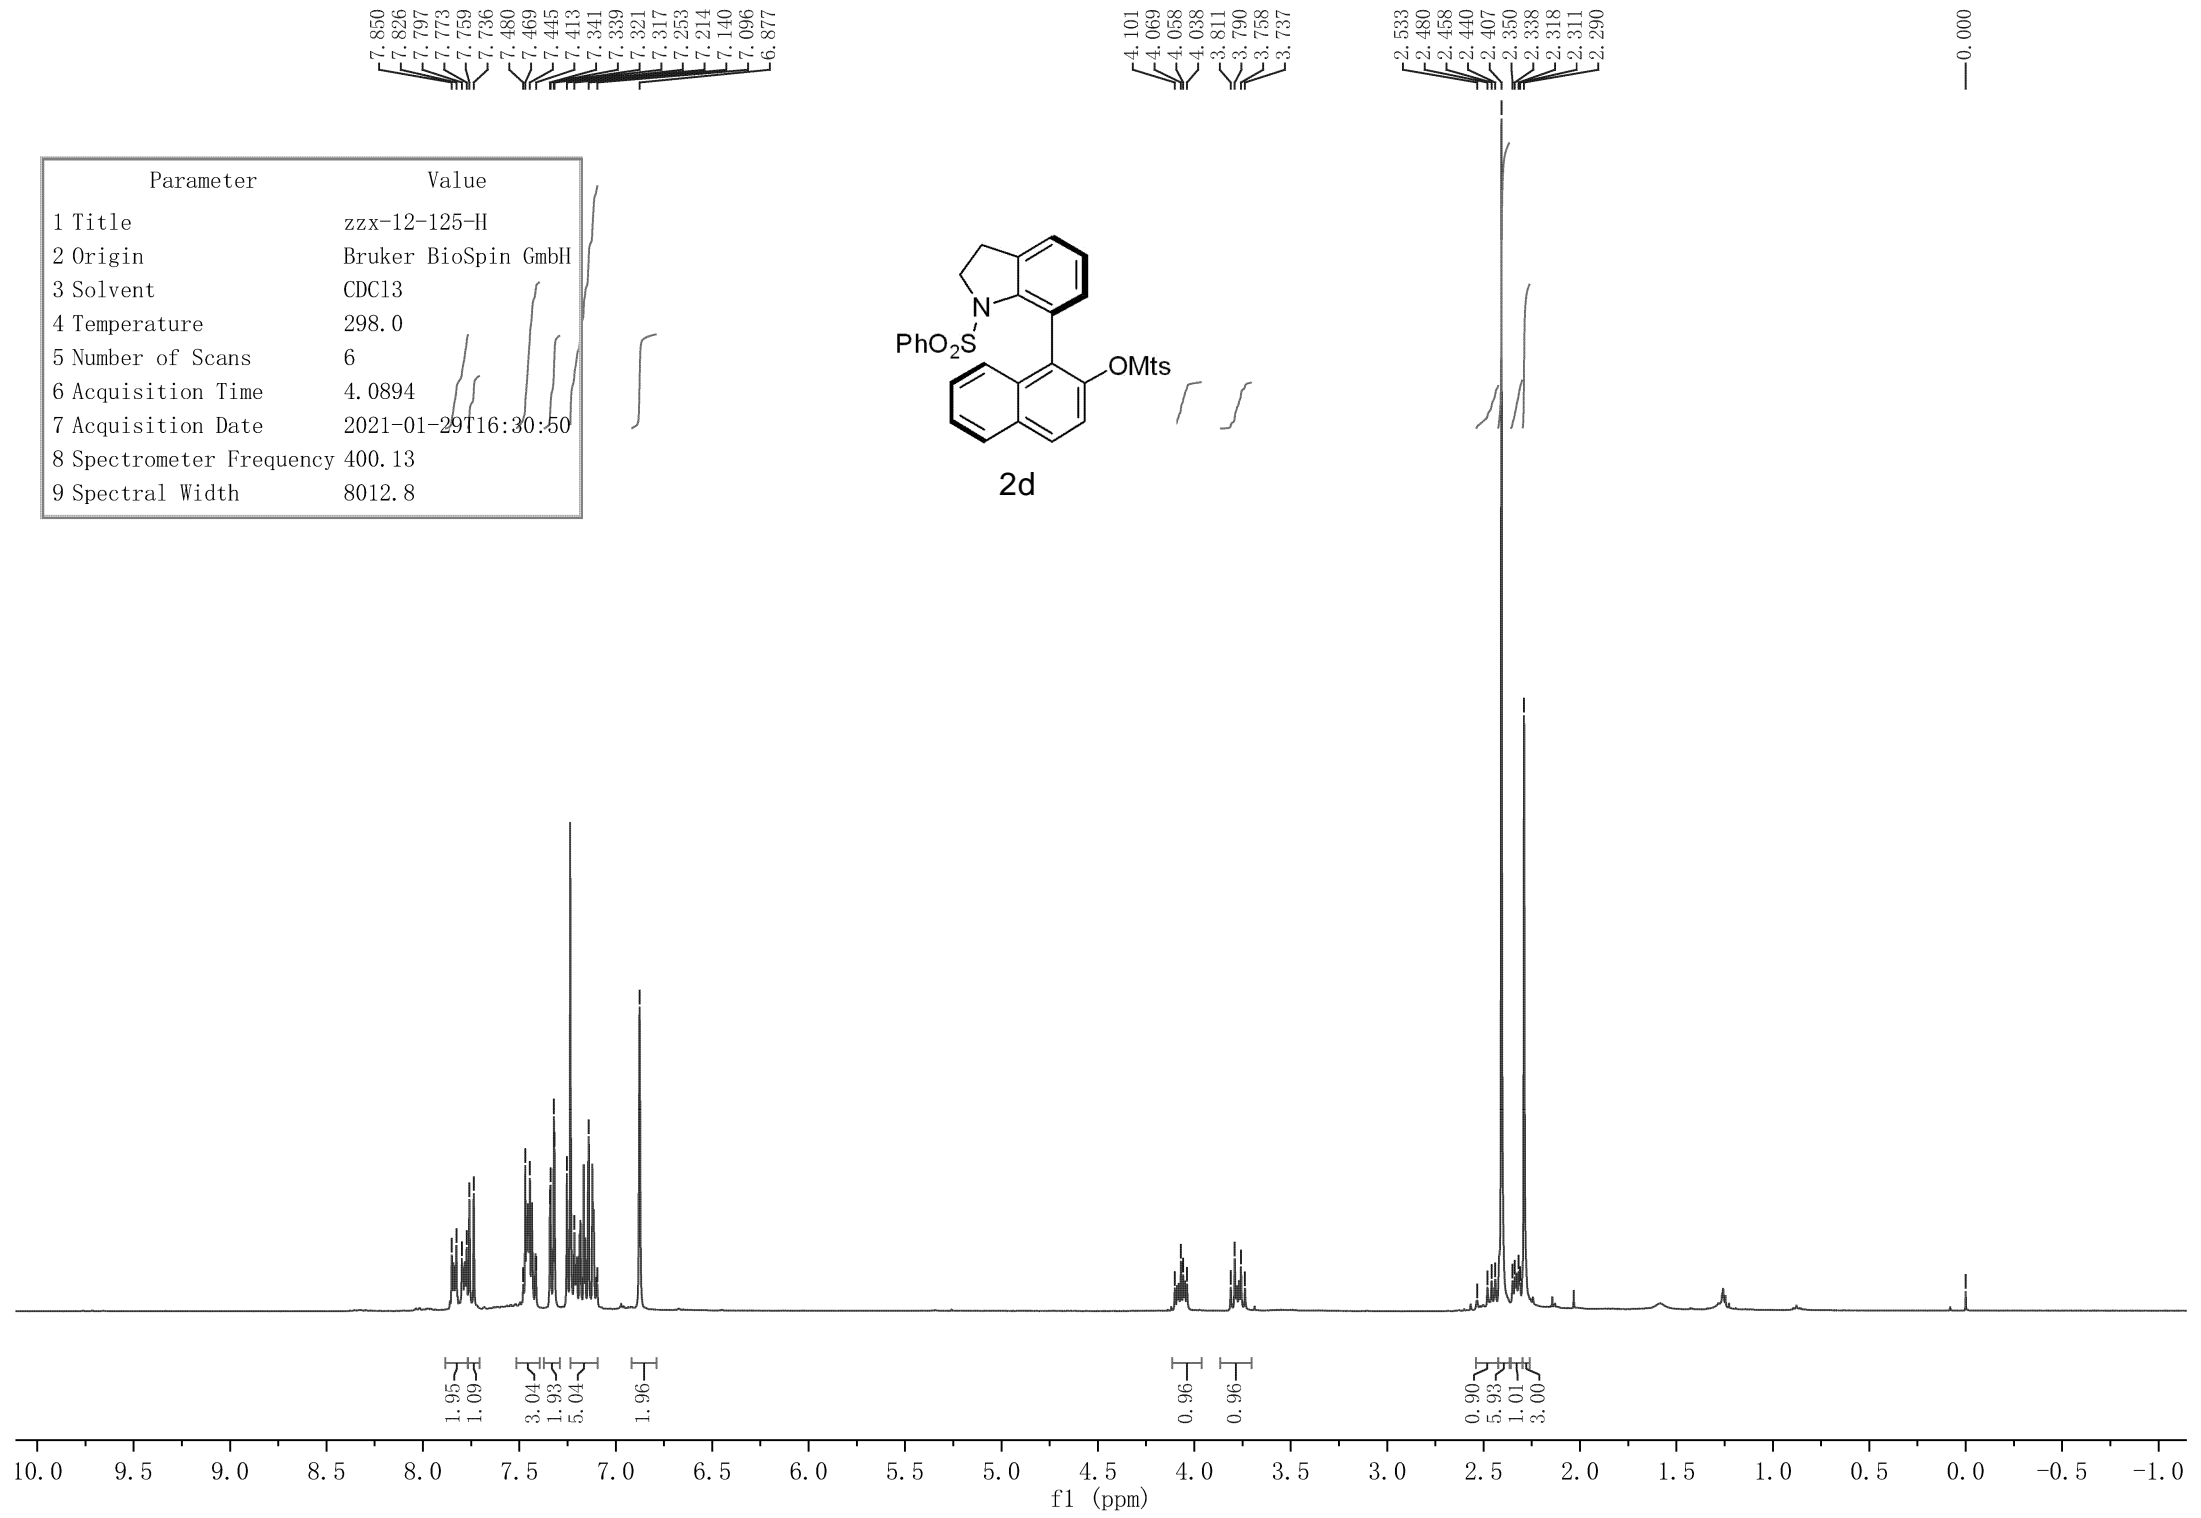

| Parameter                | Value               |
|--------------------------|---------------------|
| 1 Title                  | zzx-12-125-C        |
| 2 Origin                 | Bruker BioSpin GmbH |
| 3 Solvent                | CDC13               |
| 4 Temperature            | 300.0               |
| 5 Number of Scans        | 27                  |
| 6 Acquisition Time       | 1.3631              |
| 7 Acquisition Date       | 2021-01-29T16:32:00 |
| 8 Spectrometer Frequency | 100.62              |
| 9 Spectral Width         | 24038.5             |

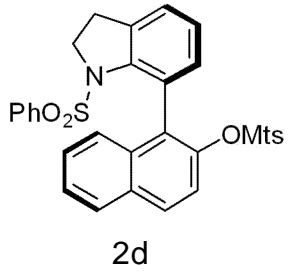

144.28  
143.21  
141.76  
139.74  
138.34  
137.45  
132.90  
132.57  
131.93  
131.85  
131.60  
130.04  
129.19  
128.50  
128.04  
127.55  
126.95  
126.52  
126.43  
126.05  
125.66  
124.46  
119.88

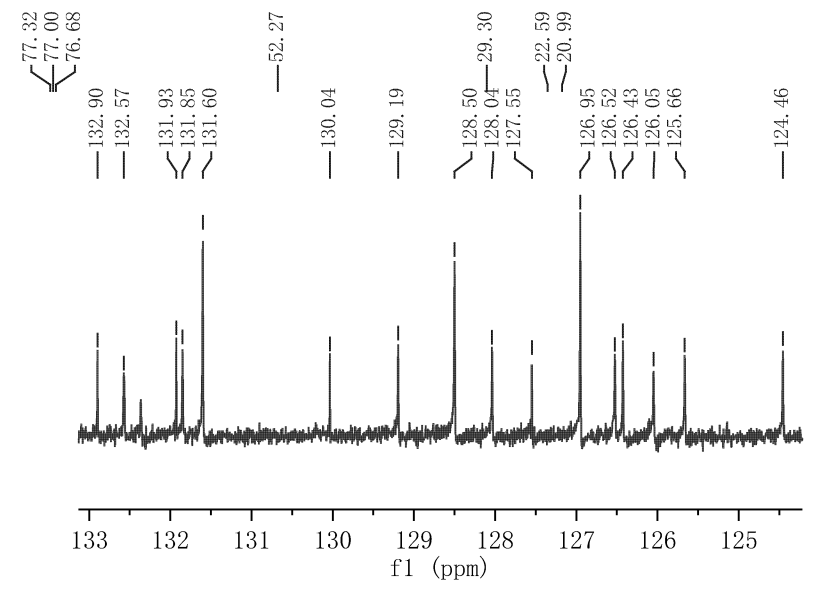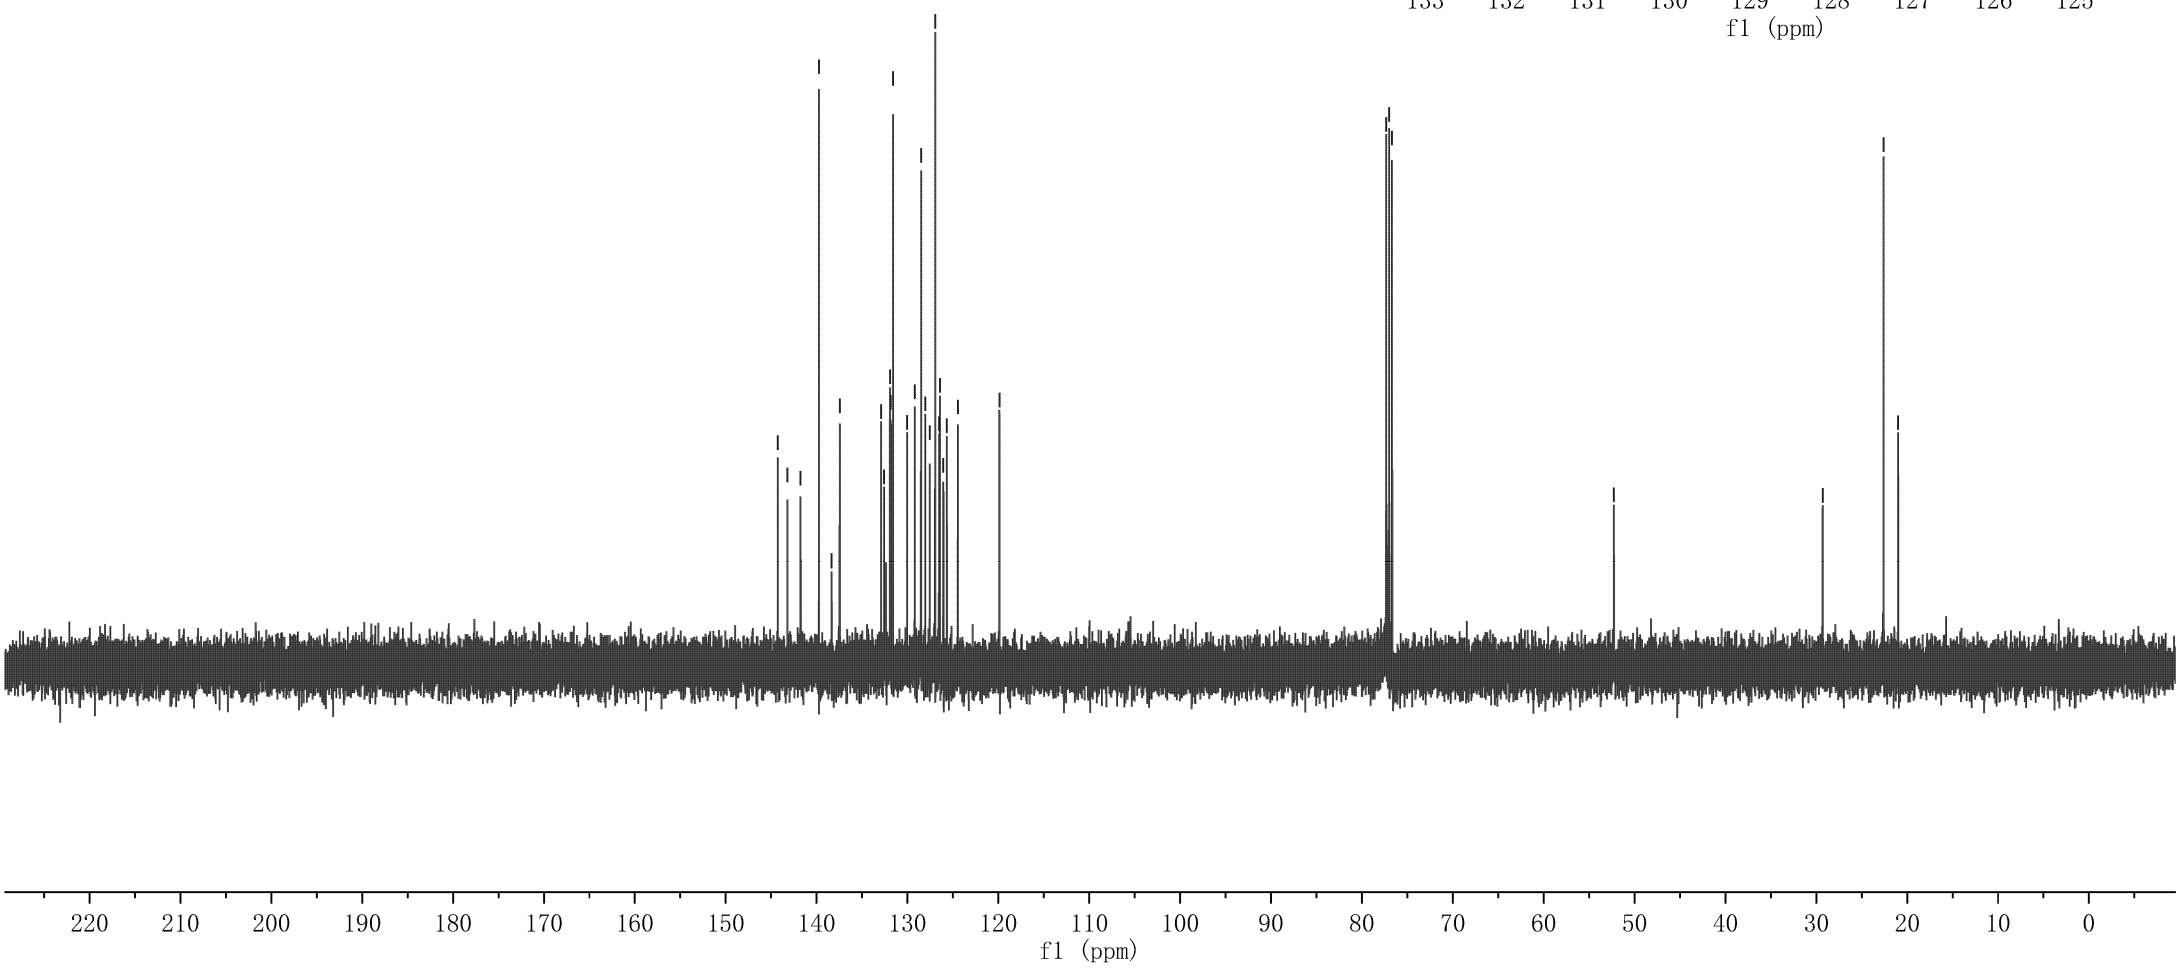

| Parameter                | Value               |
|--------------------------|---------------------|
| 1 Title                  | ZZX-11-139-H        |
| 2 Origin                 | Bruker BioSpin GmbH |
| 3 Solvent                | CDC13               |
| 4 Temperature            | 298.0               |
| 5 Number of Scans        | 6                   |
| 6 Acquisition Time       | 4.0894              |
| 7 Acquisition Date       | 2020-11-24T09:14:01 |
| 8 Spectrometer Frequency | 400.13              |
| 9 Spectral Width         | 8012.8              |

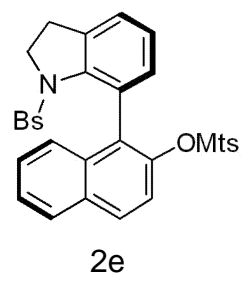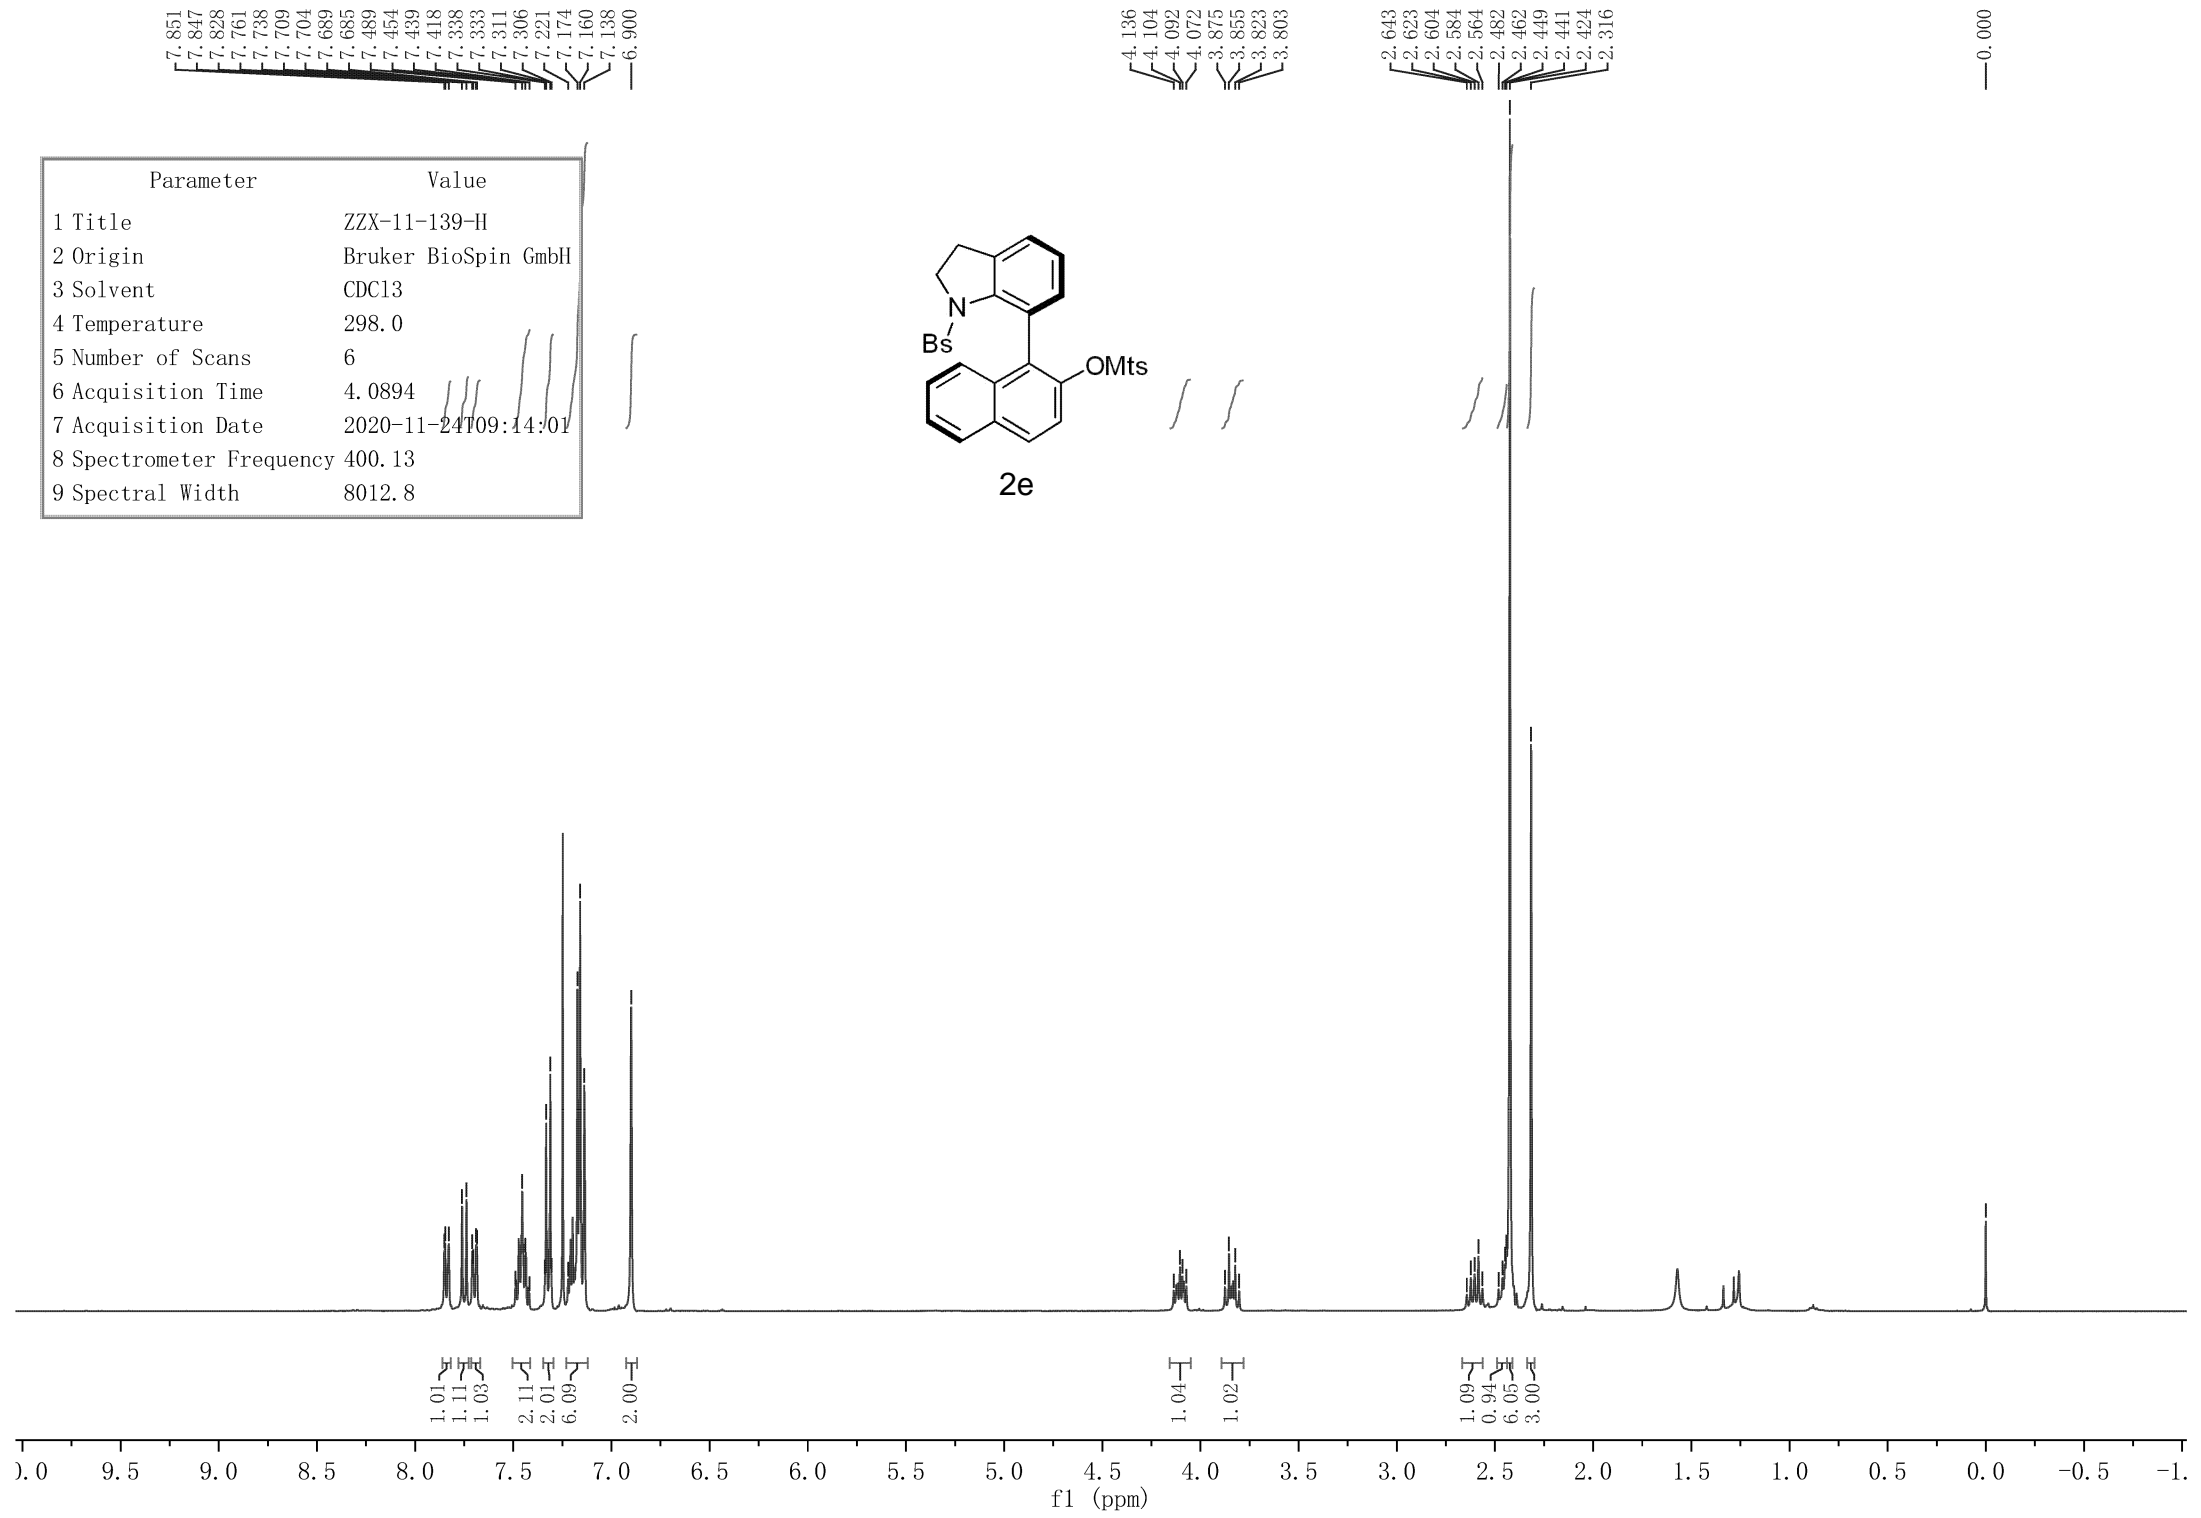



| Parameter                | Value               |
|--------------------------|---------------------|
| 1 Title                  | ZZX-11-139-C        |
| 2 Origin                 | Bruker BioSpin GmbH |
| 3 Solvent                | CDC13               |
| 4 Temperature            | 300.0               |
| 5 Number of Scans        | 65                  |
| 6 Acquisition Time       | 1.3631              |
| 7 Acquisition Date       | 2020-11-24T09:15:58 |
| 8 Spectrometer Frequency | 100.61              |
| 9 Spectral Width         | 24038.5             |

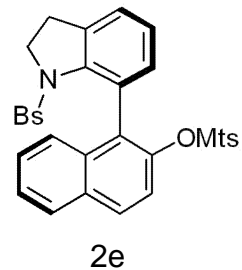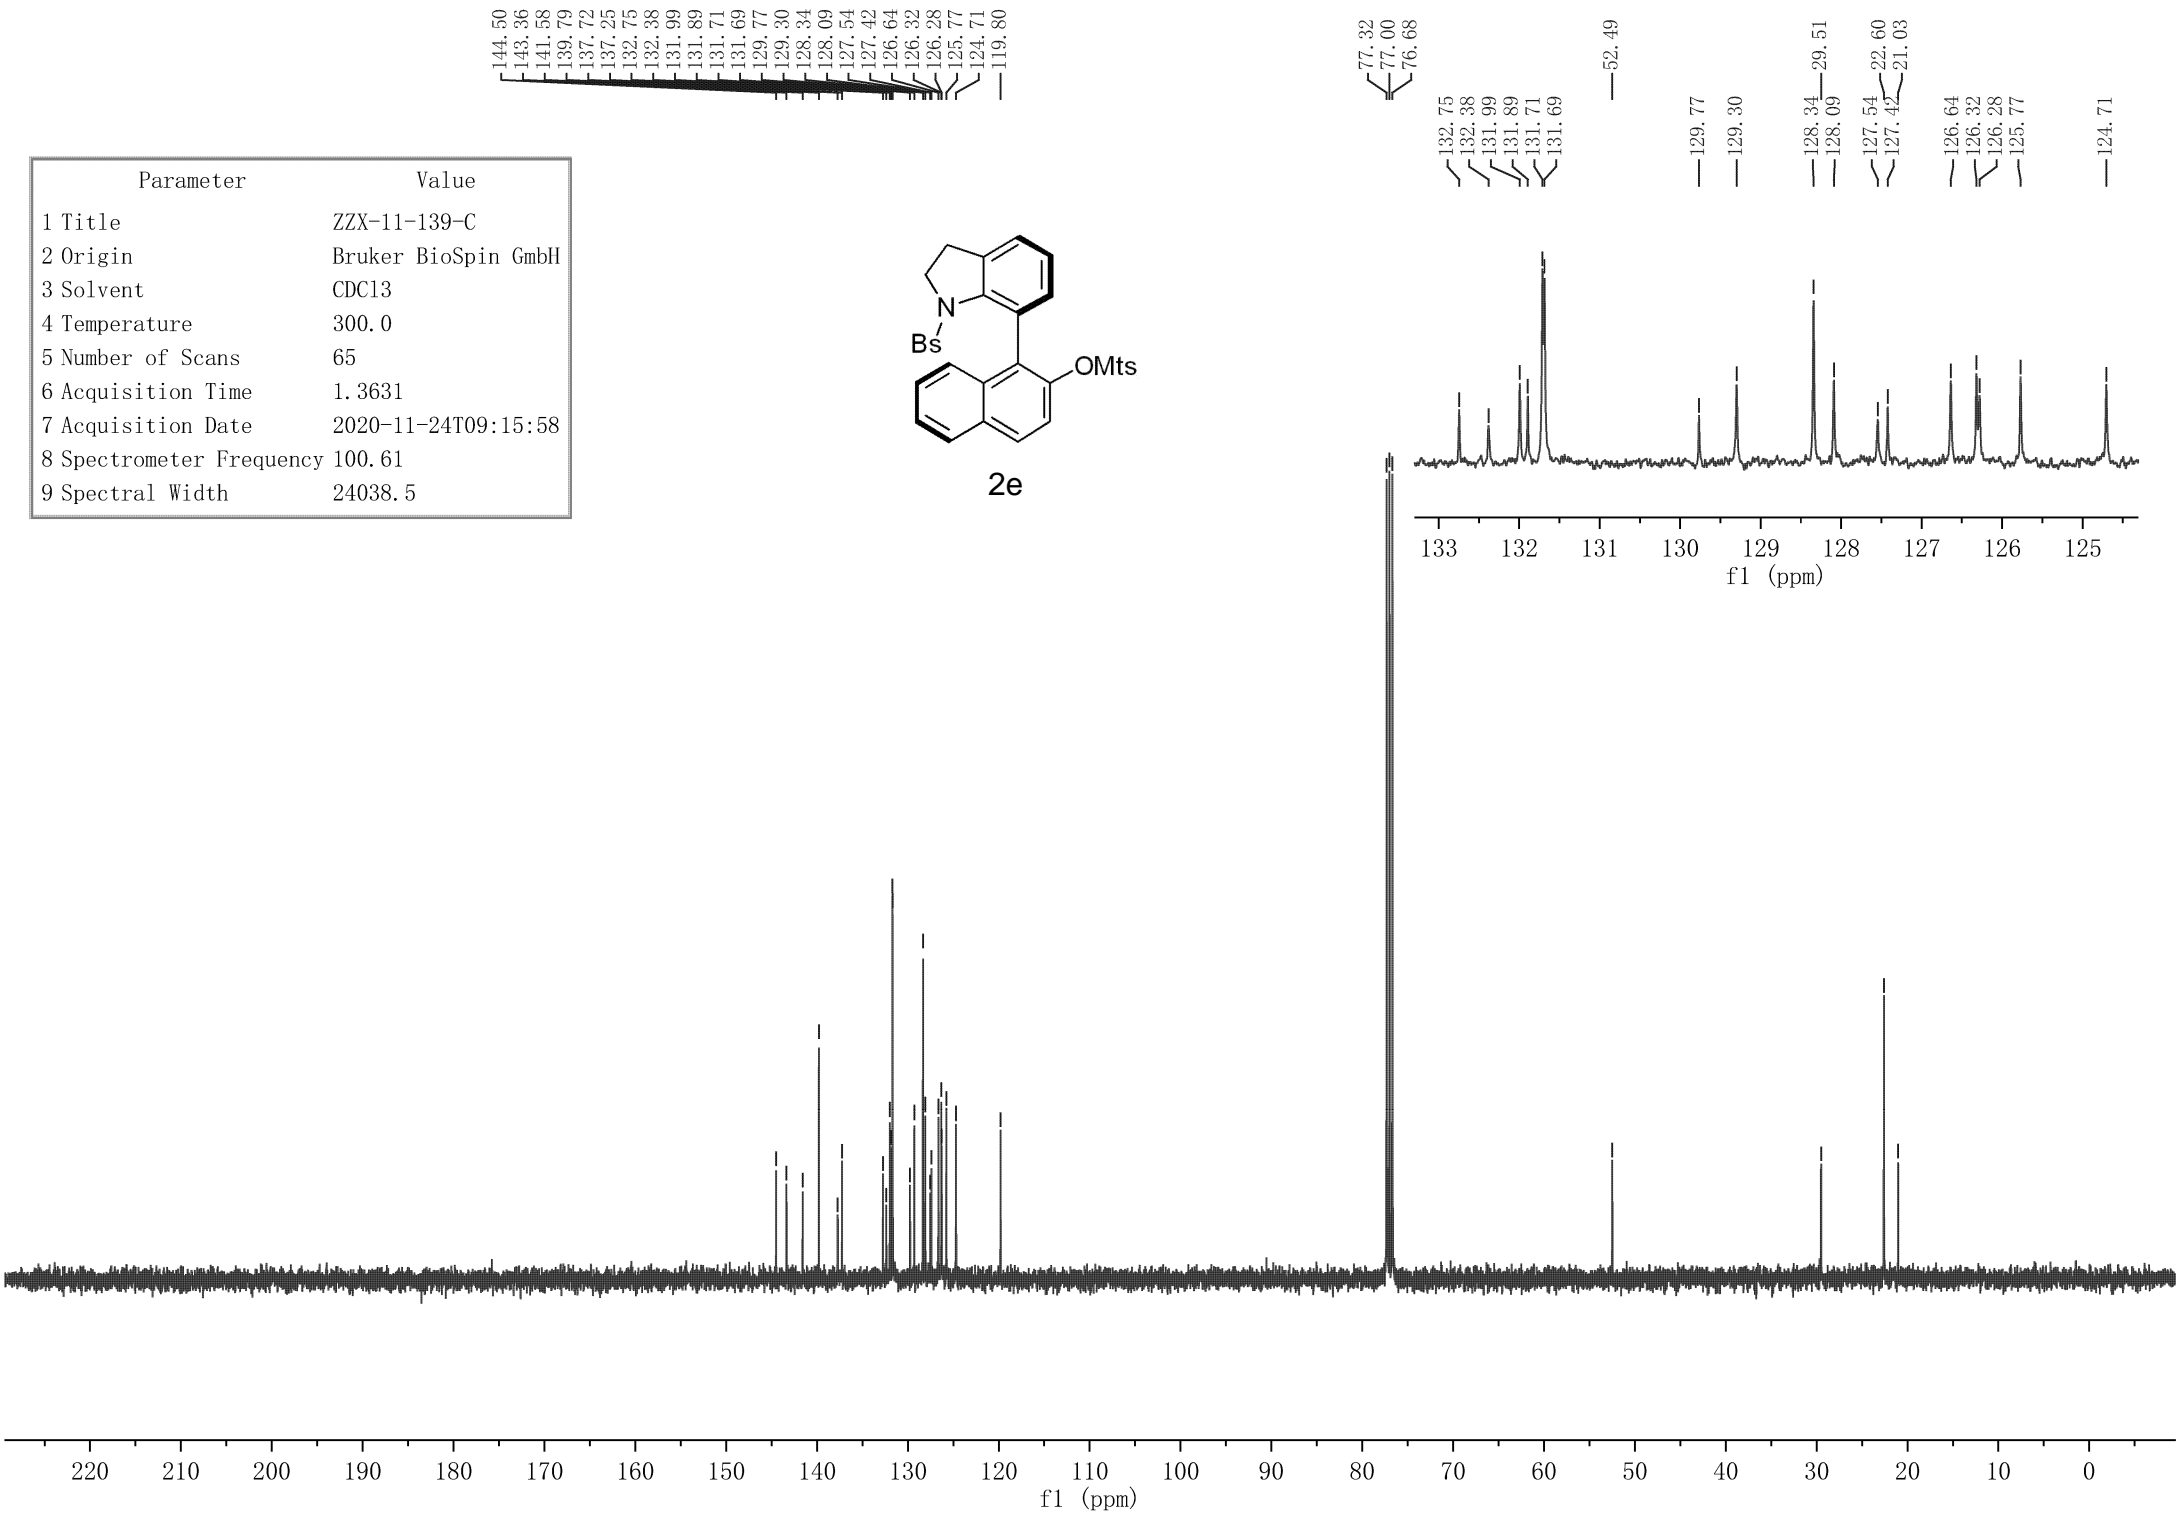

7.854  
7.833  
7.827  
7.804  
7.772  
7.752  
7.501  
7.484  
7.461  
7.439  
7.421  
7.338  
7.316  
7.280  
7.261  
7.090  
7.071  
7.052  
6.976  
6.956  
6.860

4.313  
4.285  
4.264  
4.257  
3.808  
3.781  
3.760  
3.732  
3.291  
3.268  
3.229  
3.206  
2.868  
2.843  
2.823  
2.804  
2.355  
2.308  
2.264

0.000

| Parameter                | Value               |
|--------------------------|---------------------|
| 1 Title                  | ZZX-11-141          |
| 2 Origin                 |                     |
| 3 Solvent                | CDC13               |
| 4 Temperature            | 298.0               |
| 5 Number of Scans        | 16                  |
| 6 Acquisition Time       | 4.0002              |
| 7 Acquisition Date       | 2022-03-18T23:50:28 |
| 8 Spectrometer Frequency | 399.93              |
| 9 Spectral Width         | 8012.0              |

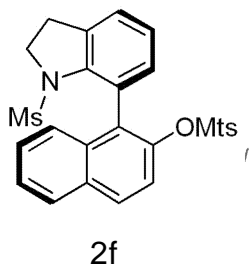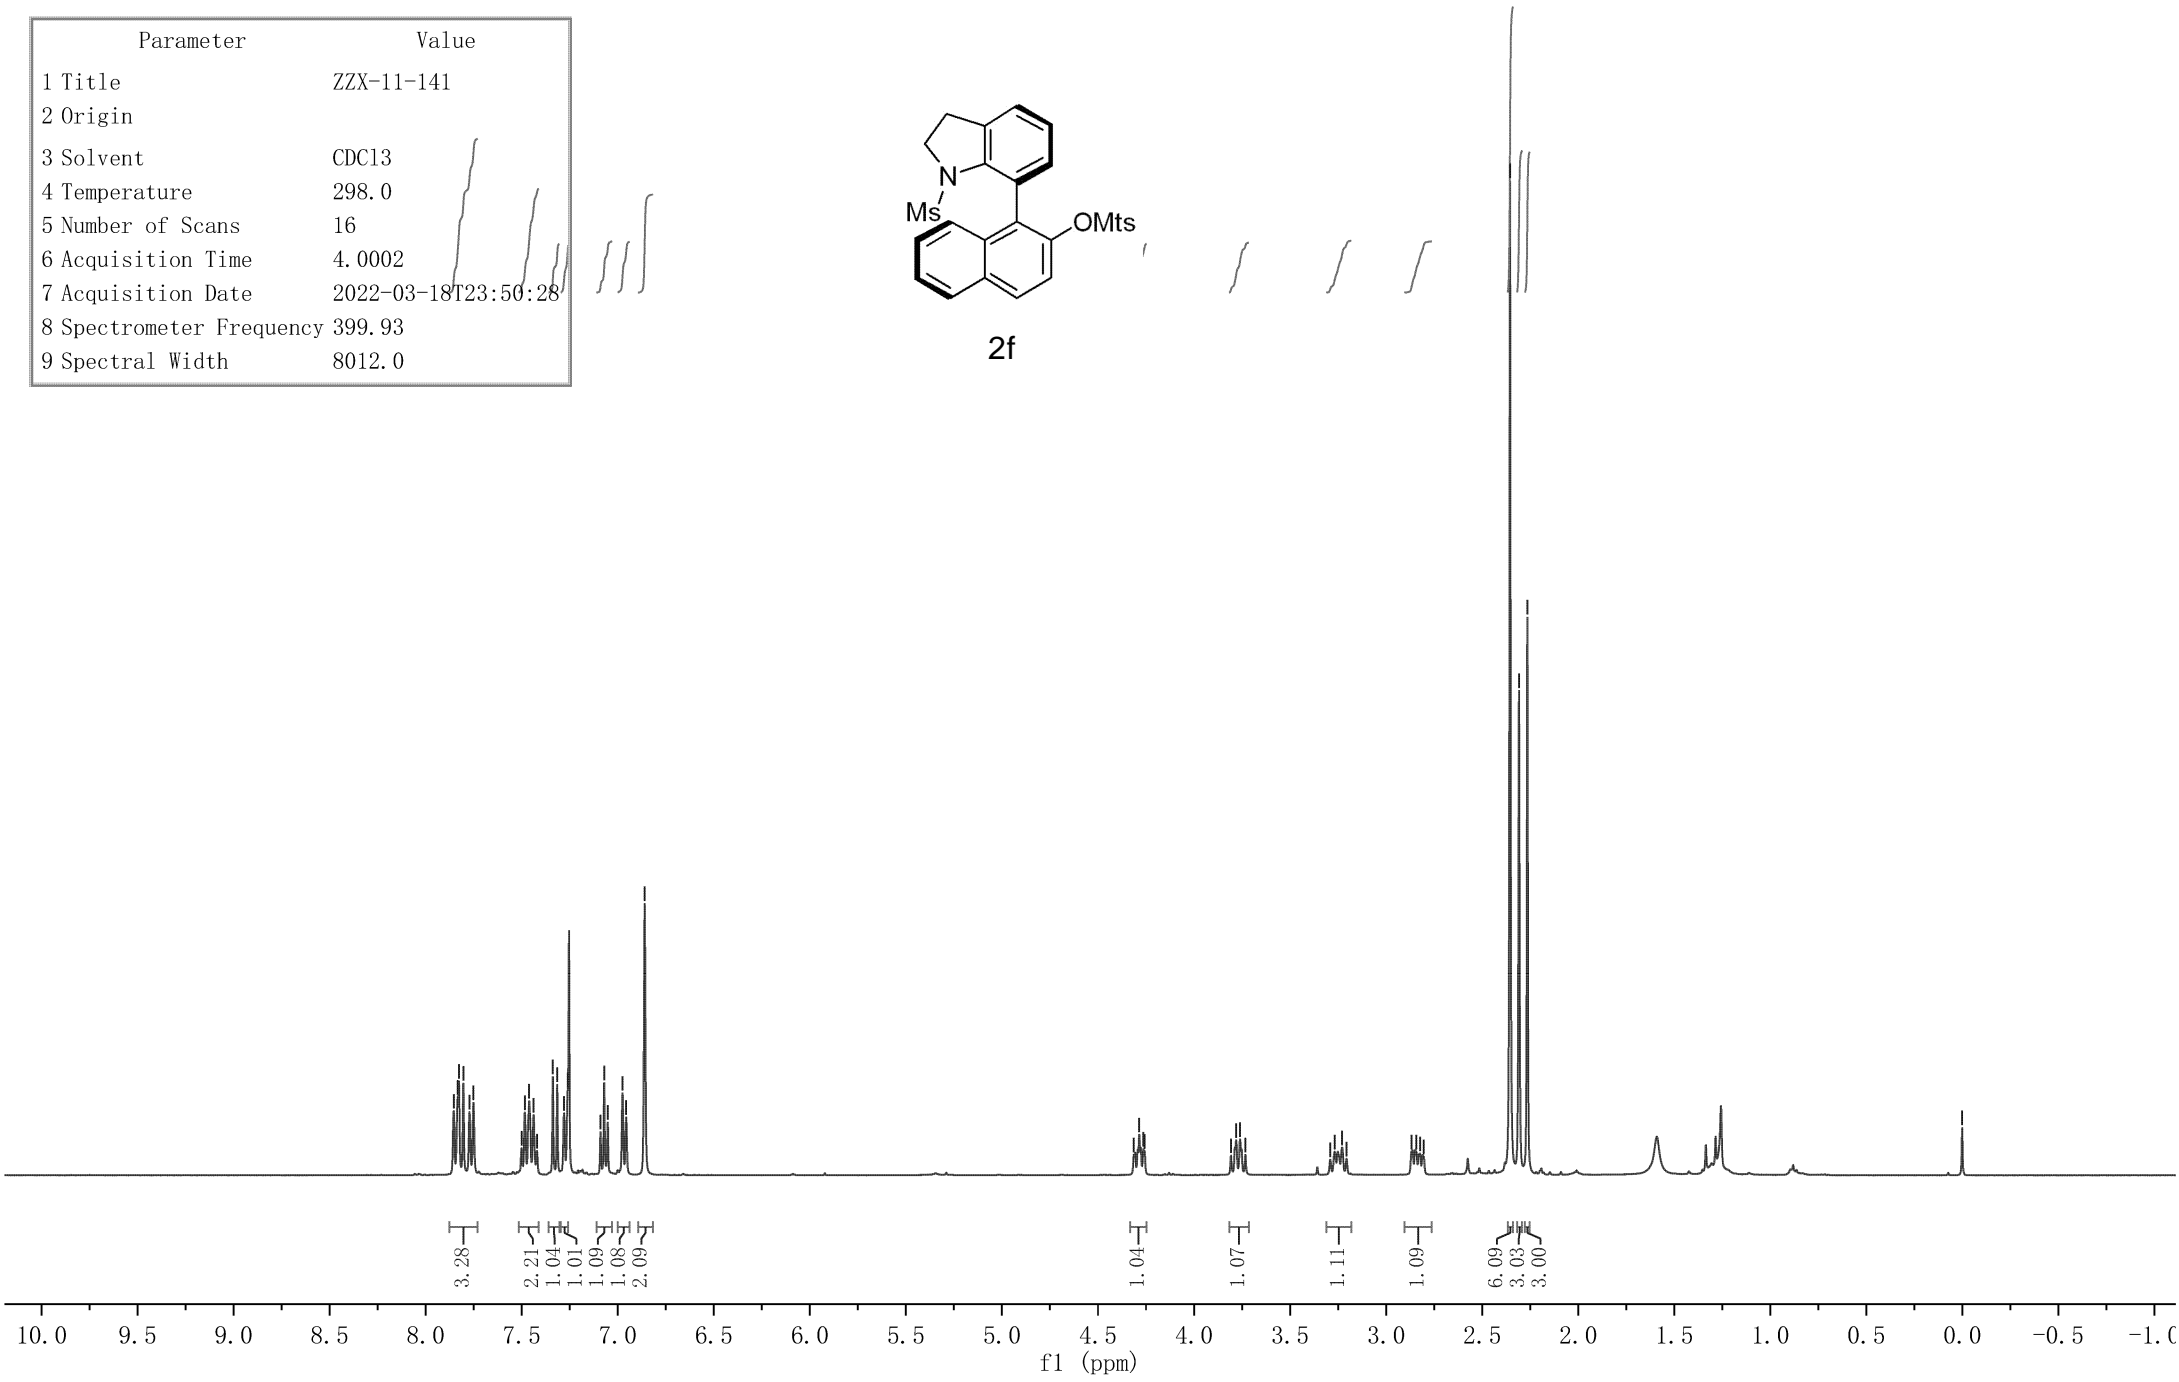

| Parameter                | Value               |
|--------------------------|---------------------|
| 1 Title                  | ZZX-11-141          |
| 2 Origin                 |                     |
| 3 Solvent                | CDC13               |
| 4 Temperature            | 298.1               |
| 5 Number of Scans        | 500                 |
| 6 Acquisition Time       | 1.0000              |
| 7 Acquisition Date       | 2022-03-19T00:07:42 |
| 8 Spectrometer Frequency | 100.56              |
| 9 Spectral Width         | 26041.0             |

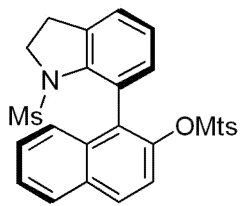

2f

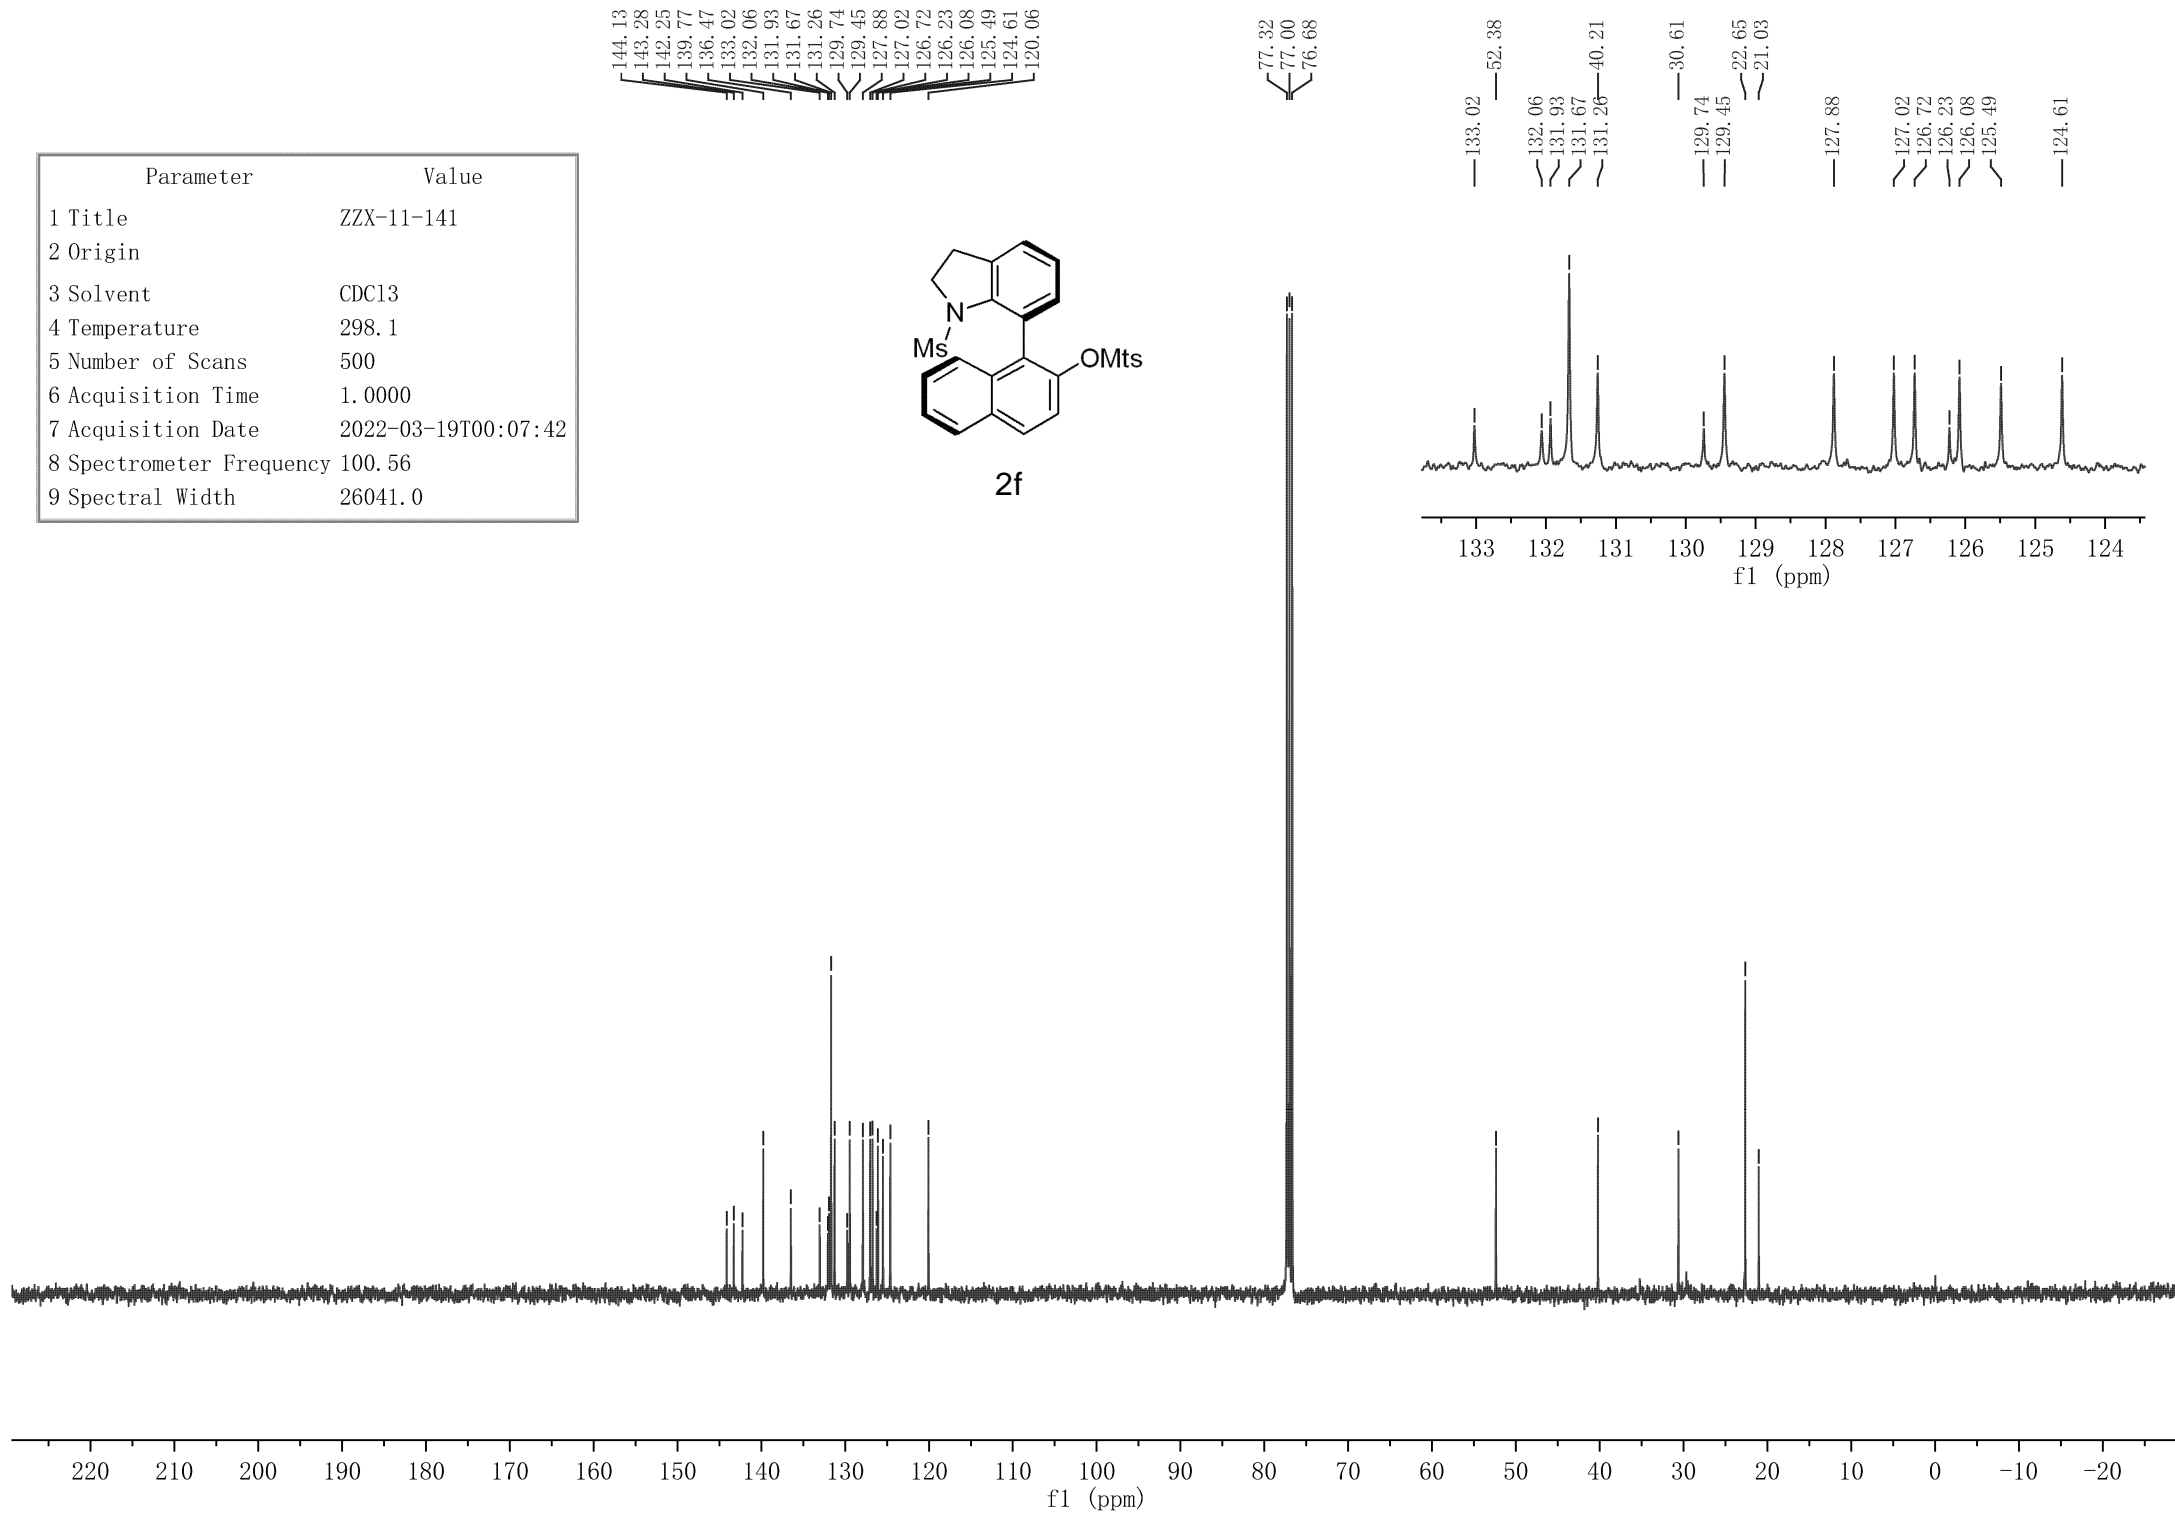

| Parameter                | Value               |
|--------------------------|---------------------|
| 1 Title                  | zzx-11-136-H        |
| 2 Origin                 | Bruker BioSpin GmbH |
| 3 Solvent                | CDC13               |
| 4 Temperature            | 298.0               |
| 5 Number of Scans        | 10                  |
| 6 Acquisition Time       | 4.0894              |
| 7 Acquisition Date       | 2020-11-21T15:49:15 |
| 8 Spectrometer Frequency | 400.13              |
| 9 Spectral Width         | 8012.8              |

7.876  
7.853  
7.830  
7.807  
7.482  
7.473  
7.460  
7.451  
7.329  
7.308  
7.183  
7.162  
7.104  
7.084  
7.027  
7.007  
6.986  
6.967

4.087  
4.068  
4.048  
4.029  
3.695  
3.674  
3.649  
3.618

2.477  
2.454  
2.436  
2.414  
2.385  
2.360  
2.352  
2.330

0.000

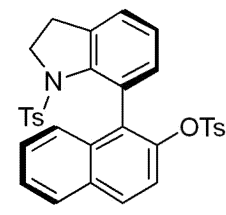

2g

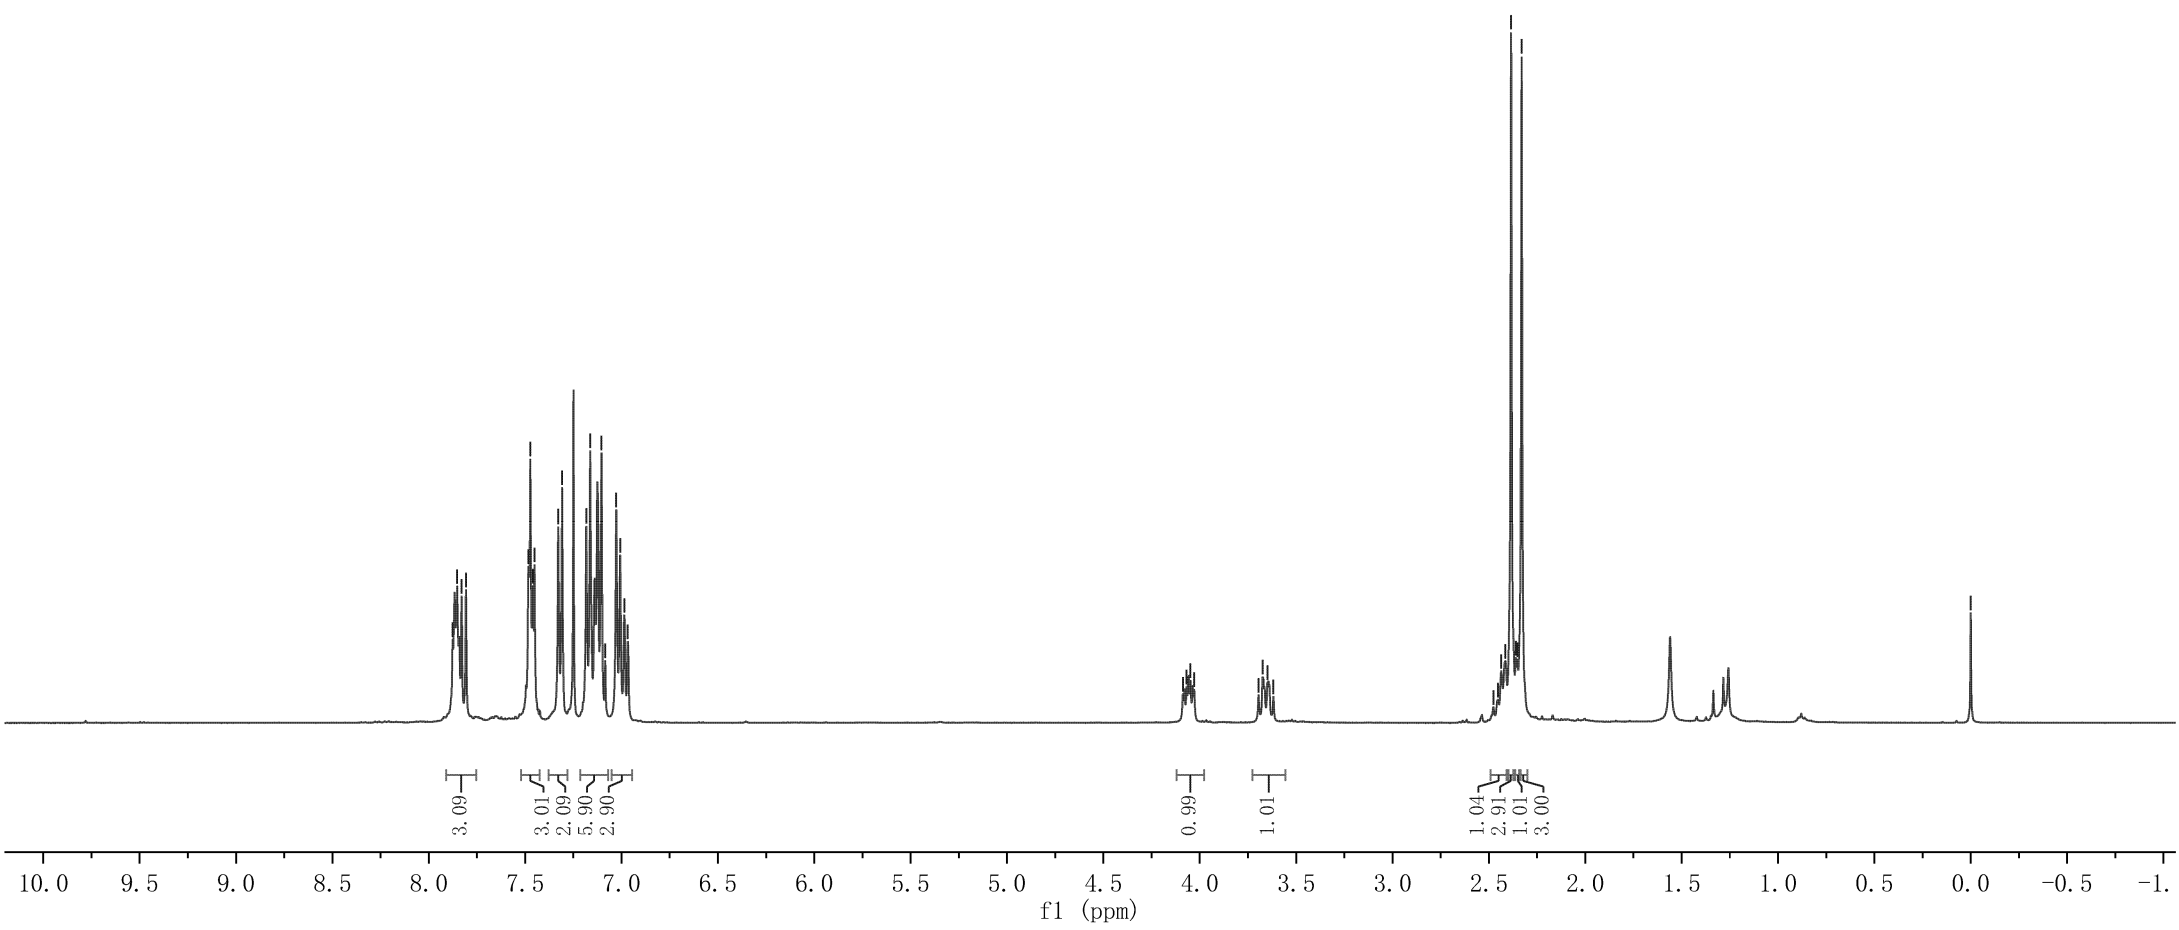

| Parameter                | Value               |
|--------------------------|---------------------|
| 1 Title                  | zzx-11-136-C        |
| 2 Origin                 | Bruker BioSpin GmbH |
| 3 Solvent                | CDC13               |
| 4 Temperature            | 300.0               |
| 5 Number of Scans        | 90                  |
| 6 Acquisition Time       | 1.3631              |
| 7 Acquisition Date       | 2020-11-21T15:50:43 |
| 8 Spectrometer Frequency | 100.61              |
| 9 Spectral Width         | 24038.5             |

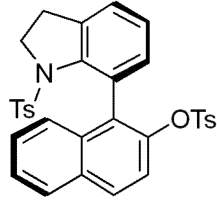

2g

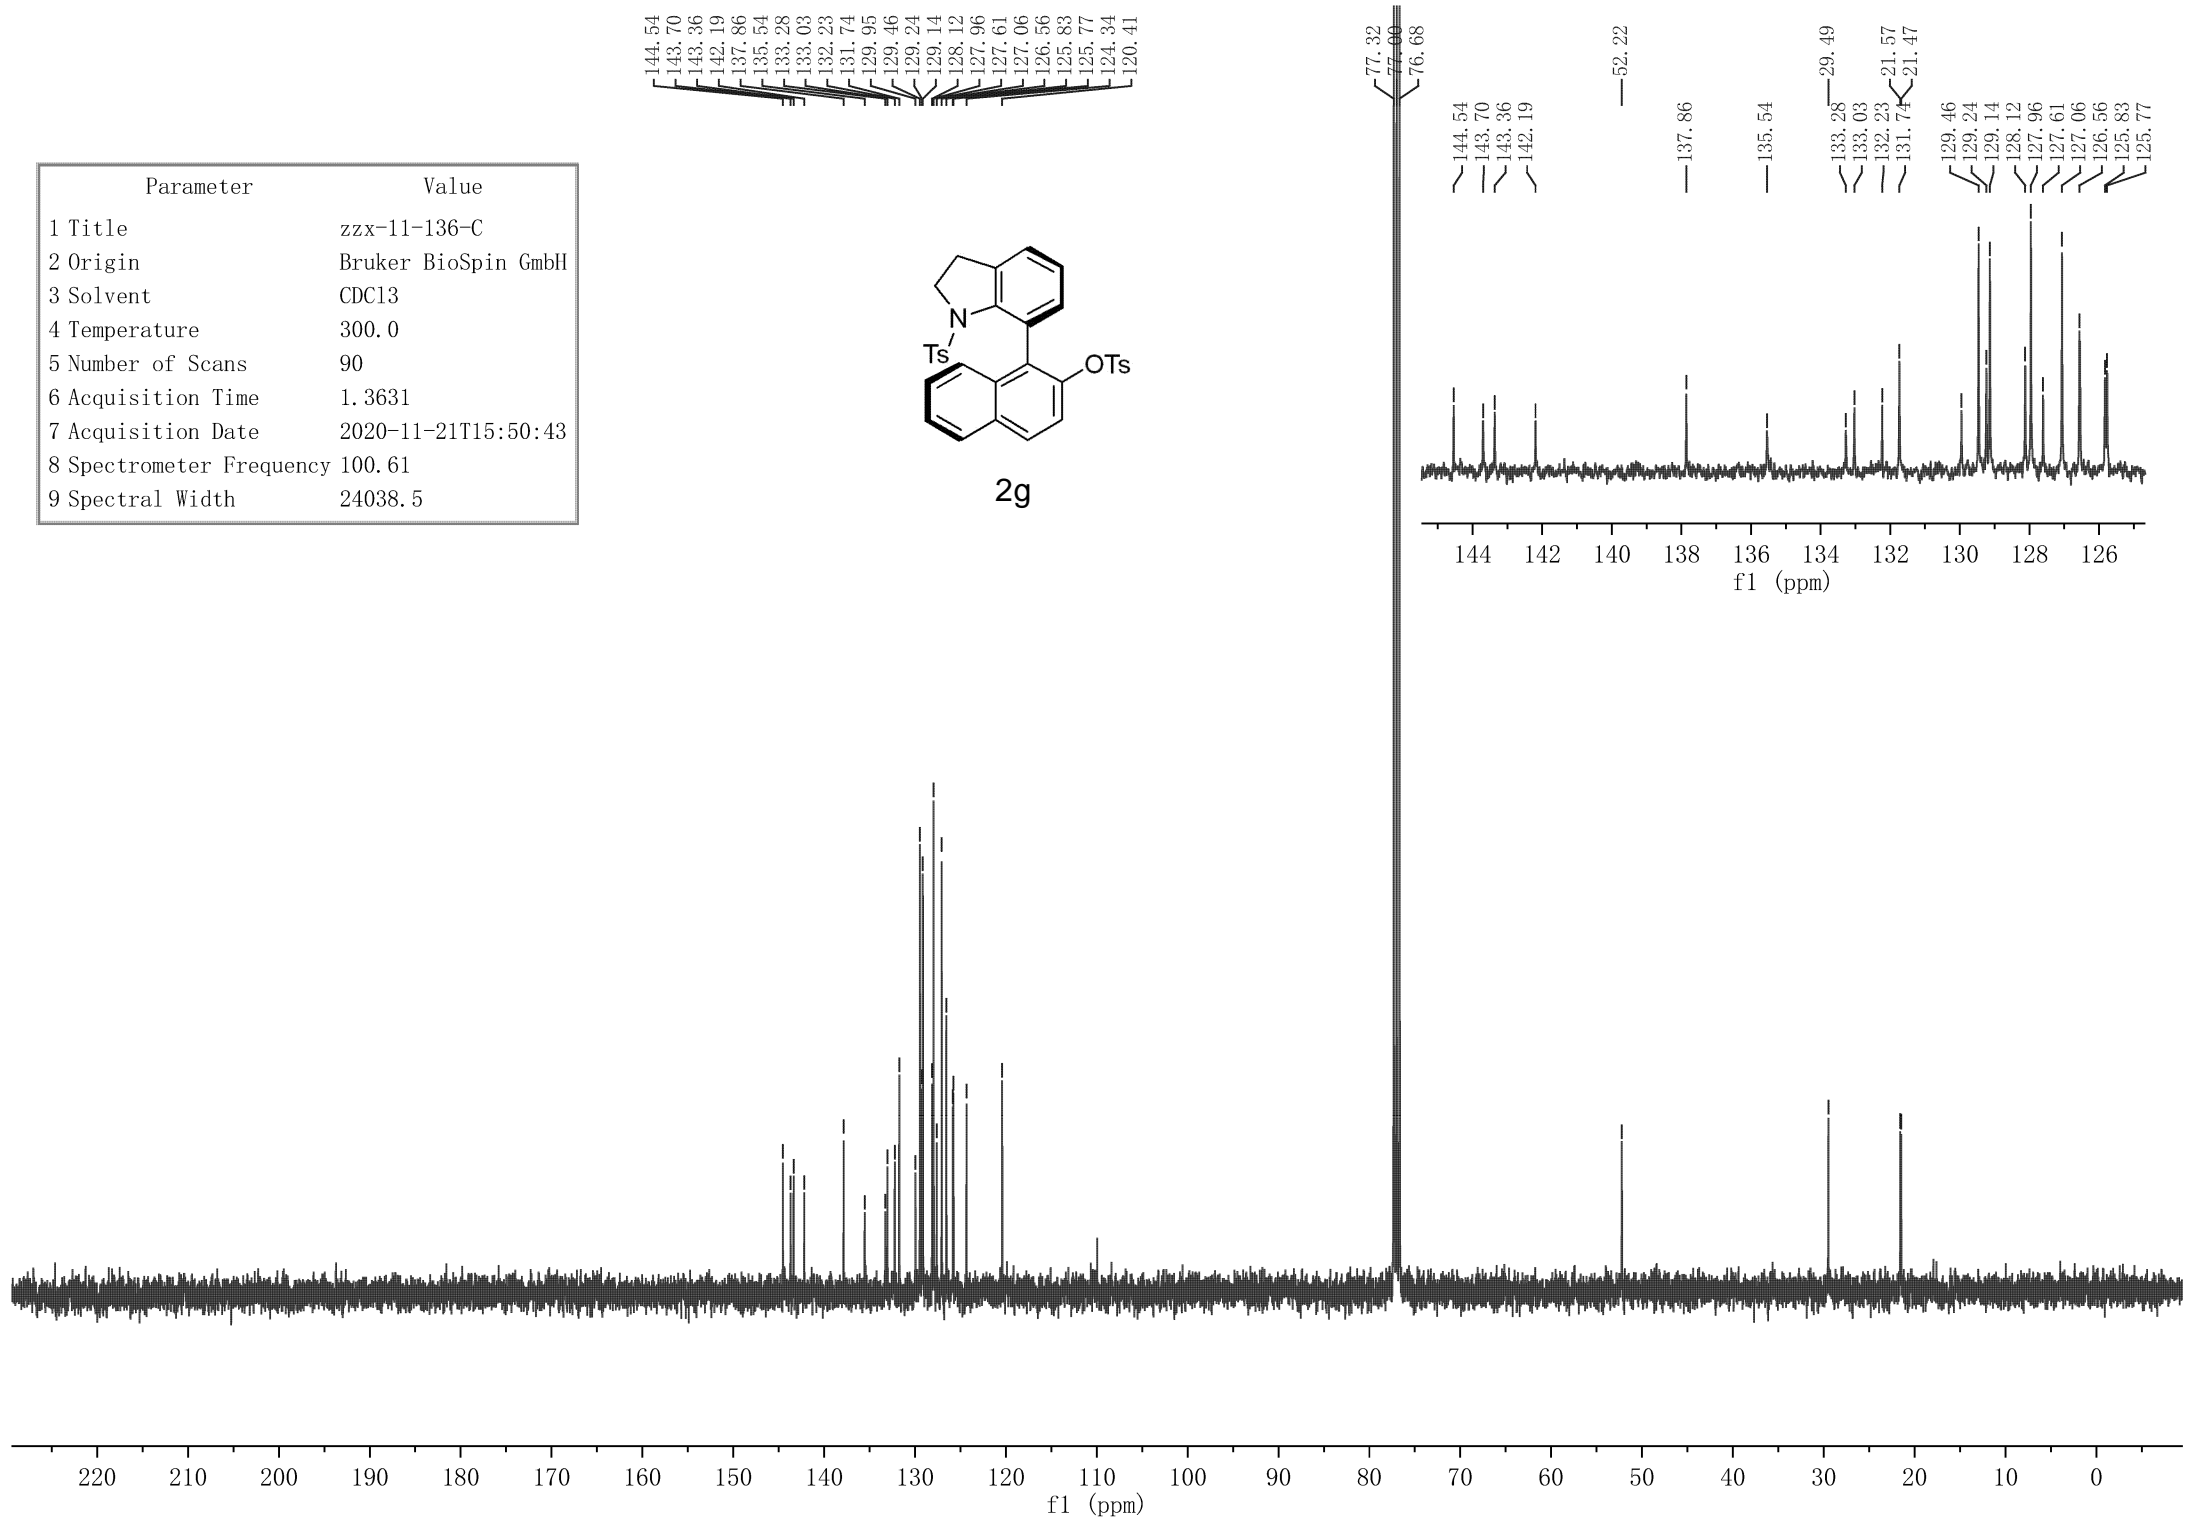

7.875  
7.851  
7.833  
7.810  
7.493  
7.482  
7.471  
7.458  
7.346  
7.324  
7.184  
7.163  
7.115  
7.097  
7.033  
7.013  
6.992  
6.974  
6.772  
6.750

4.092  
4.062  
4.043  
4.034  
3.809  
3.713  
3.689  
3.658  
3.636

2.467  
2.403  
2.388  
2.368  
2.327

0.000

| Parameter                | Value               |
|--------------------------|---------------------|
| 1 Title                  | zzx-12-175-H        |
| 2 Origin                 | Bruker BioSpin GmbH |
| 3 Solvent                | CDC13               |
| 4 Temperature            | 298.0               |
| 5 Number of Scans        | 5                   |
| 6 Acquisition Time       | 4.0894              |
| 7 Acquisition Date       | 2021-03-06T16:49:41 |
| 8 Spectrometer Frequency | 400.13              |
| 9 Spectral Width         | 8012.8              |

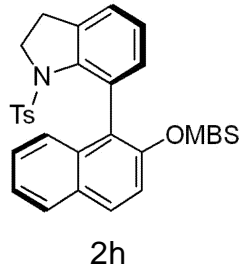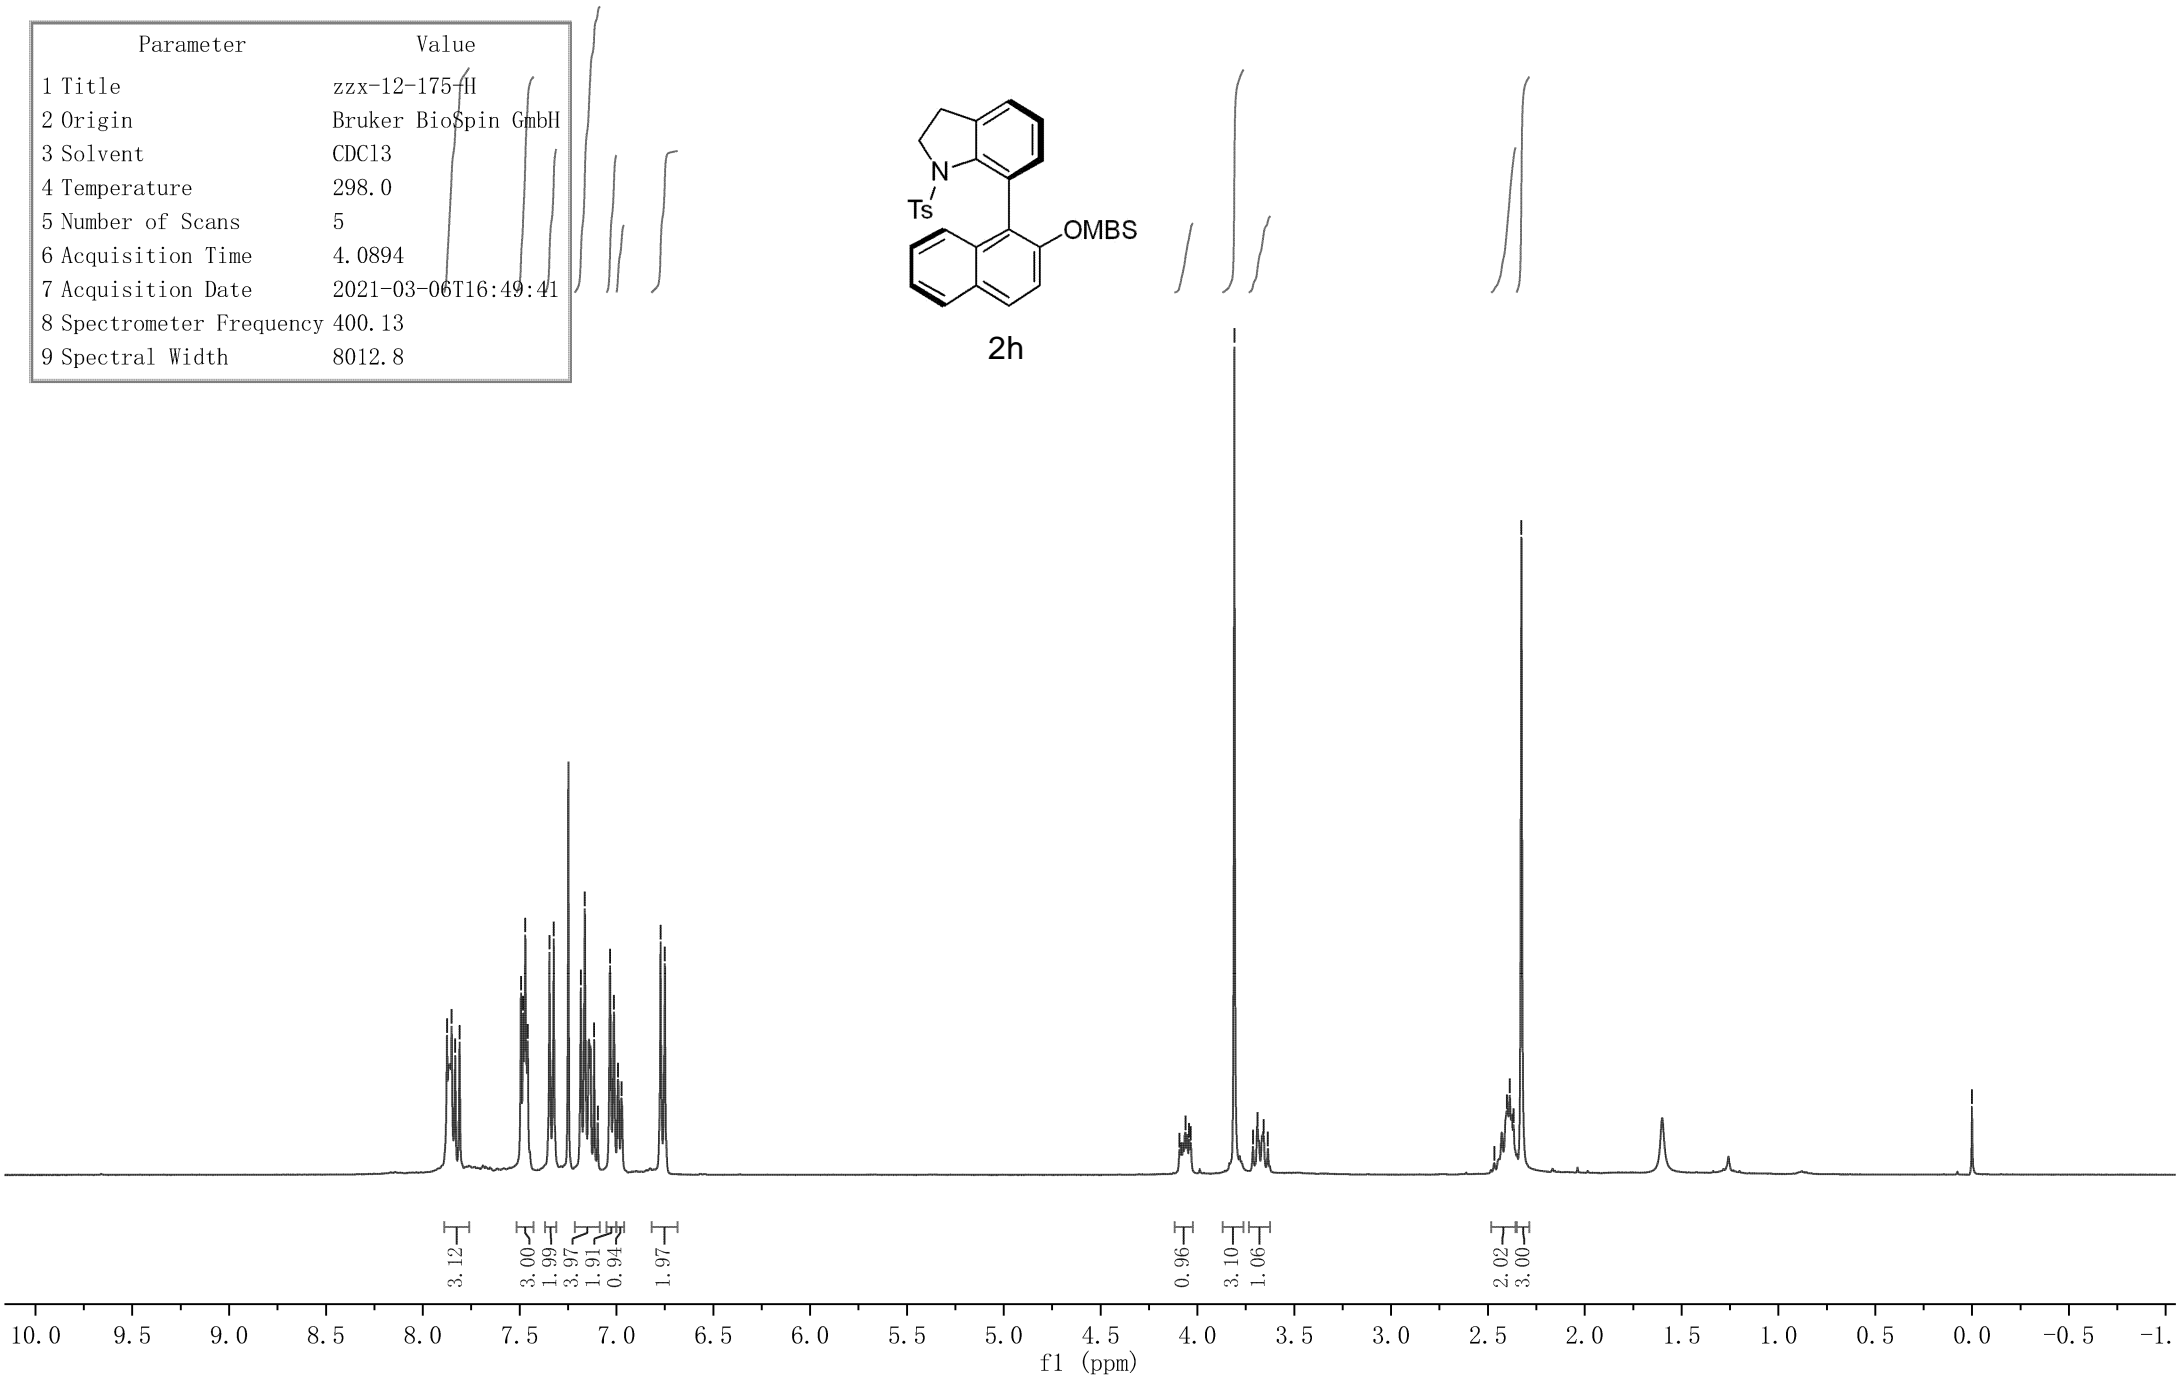

| Parameter                | Value               |
|--------------------------|---------------------|
| 1 Title                  | zzx-12-175-C        |
| 2 Origin                 | Bruker BioSpin GmbH |
| 3 Solvent                | CDC13               |
| 4 Temperature            | 300.0               |
| 5 Number of Scans        | 53                  |
| 6 Acquisition Time       | 1.3631              |
| 7 Acquisition Date       | 2021-03-06T16:51:32 |
| 8 Spectrometer Frequency | 100.61              |
| 9 Spectral Width         | 24038.5             |

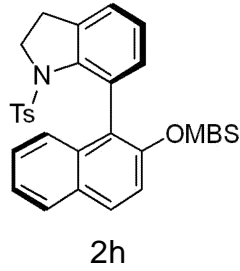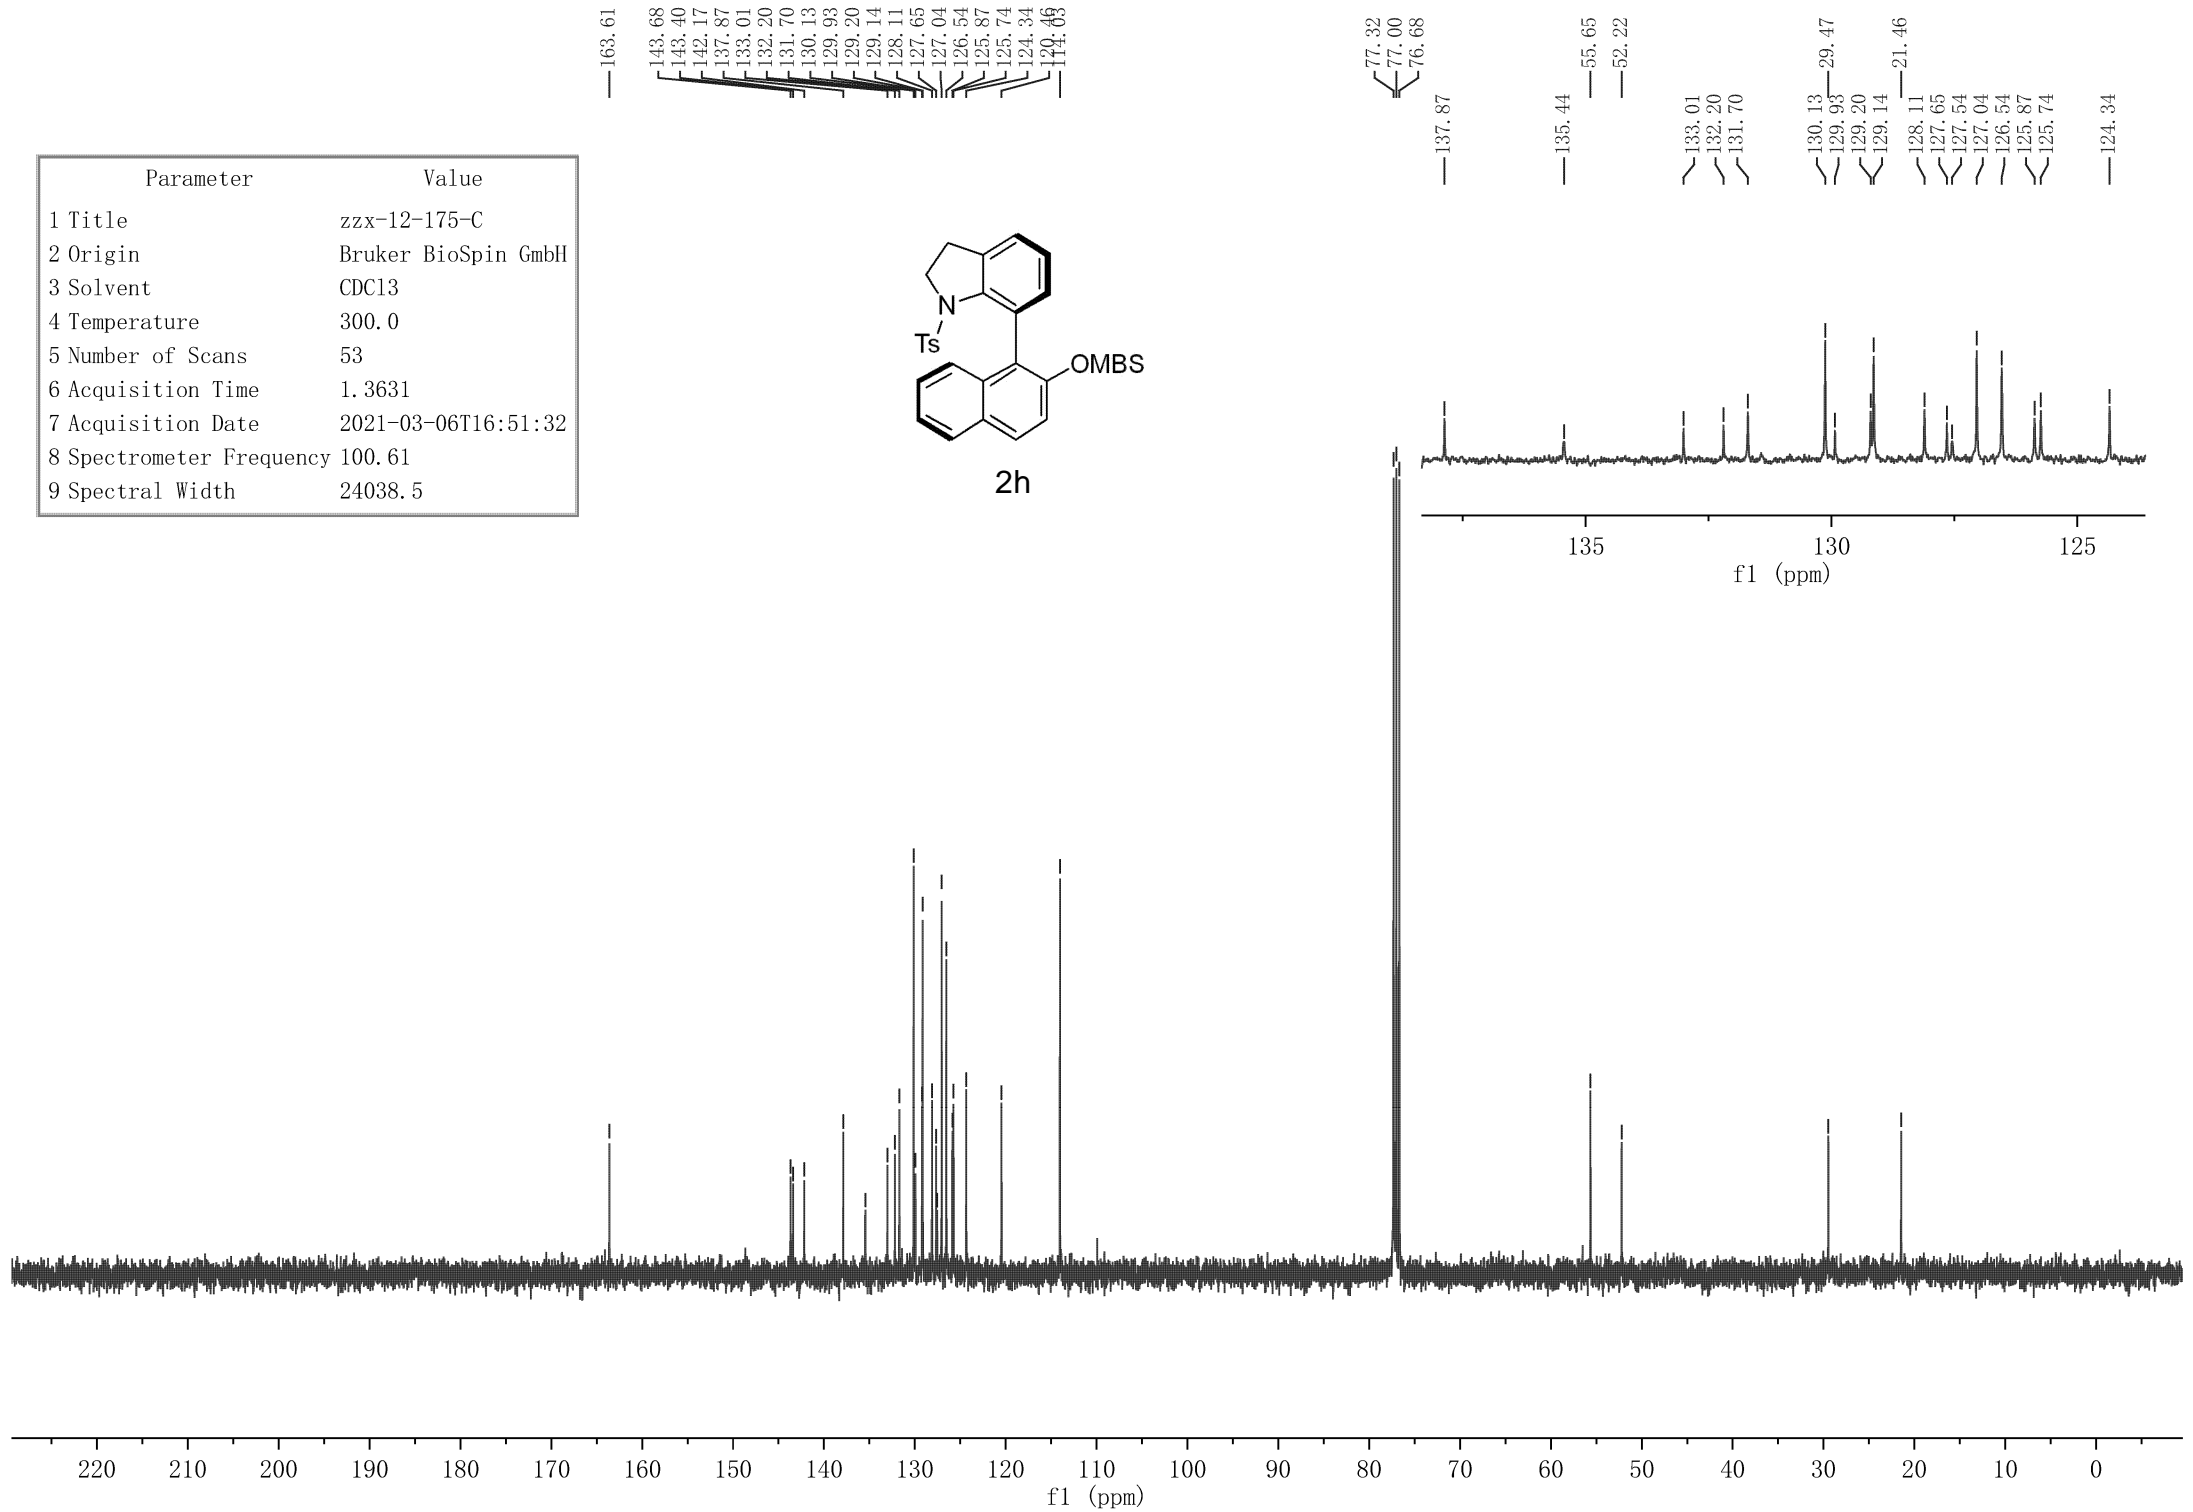

7.887  
7.868  
7.855  
7.832  
7.531  
7.509  
7.488  
7.477  
7.467  
7.330  
7.182  
7.164  
7.133  
7.067  
7.035  
7.015  
6.950  
6.931

4.069  
4.067  
4.043  
4.019  
3.619  
3.592  
3.566  
3.542

2.466  
2.430  
2.405  
2.383  
2.329

1.312

0.000

| Parameter                | Value               |
|--------------------------|---------------------|
| 1 Title                  | zzx-11-165-H        |
| 2 Origin                 | Bruker BioSpin GmbH |
| 3 Solvent                | CDC13               |
| 4 Temperature            | 298.0               |
| 5 Number of Scans        | 10                  |
| 6 Acquisition Time       | 4.0894              |
| 7 Acquisition Date       | 2020-11-29T14:41:44 |
| 8 Spectrometer Frequency | 400.13              |
| 9 Spectral Width         | 8012.8              |

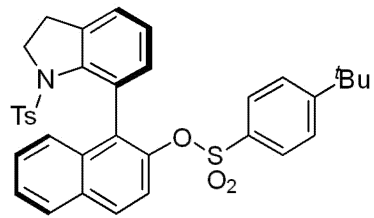

2i

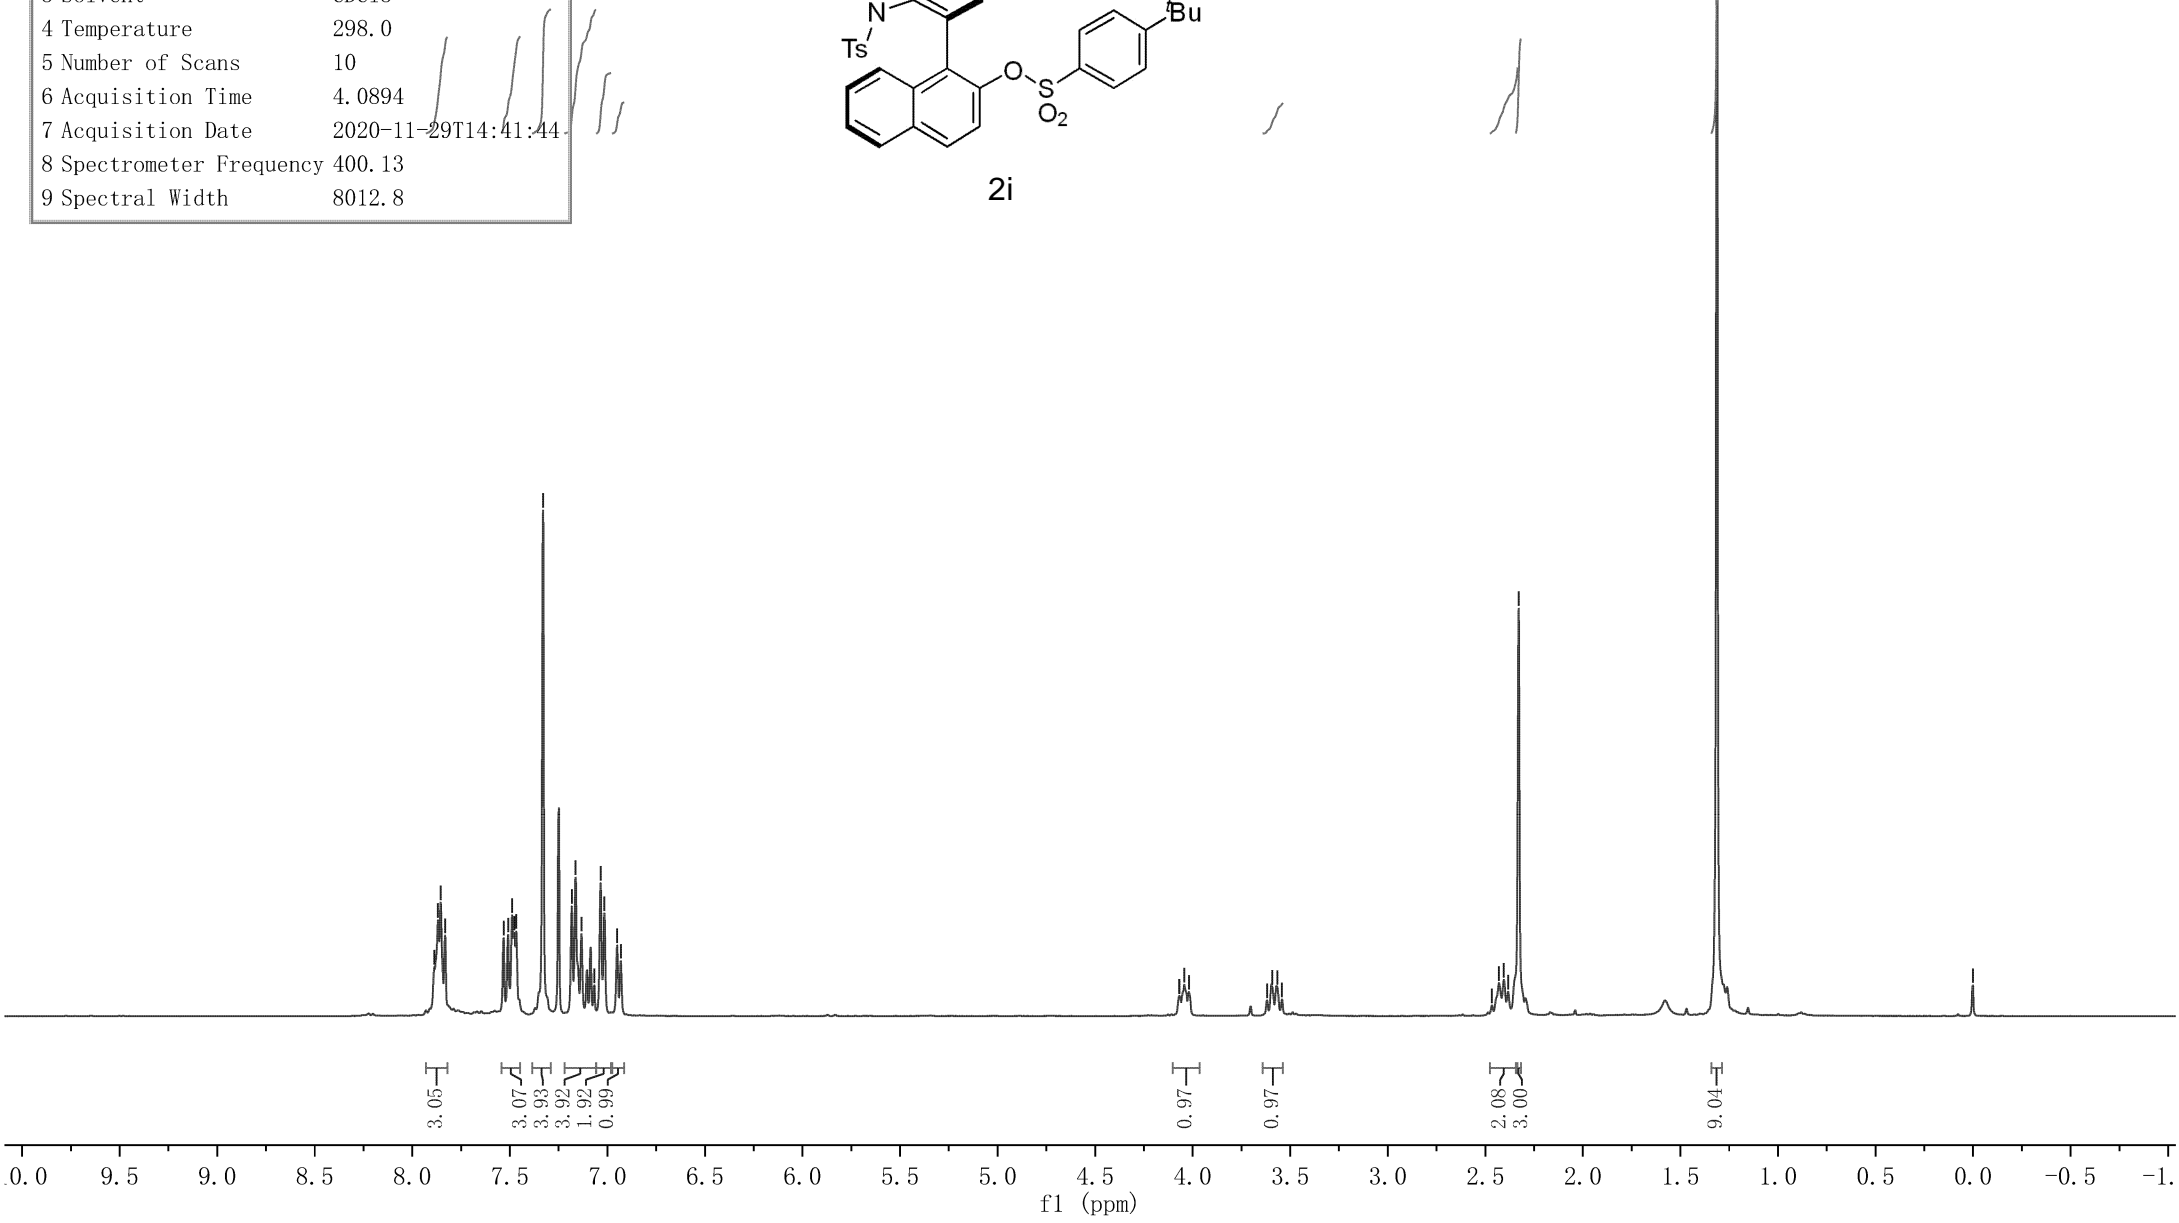



| Parameter                | Value               |
|--------------------------|---------------------|
| 1 Title                  | zzx-11-165-C        |
| 2 Origin                 | Bruker BioSpin GmbH |
| 3 Solvent                | CDC13               |
| 4 Temperature            | 300.0               |
| 5 Number of Scans        | 33                  |
| 6 Acquisition Time       | 1.3631              |
| 7 Acquisition Date       | 2020-11-29T14:43:53 |
| 8 Spectrometer Frequency | 100.61              |
| 9 Spectral Width         | 24038.5             |

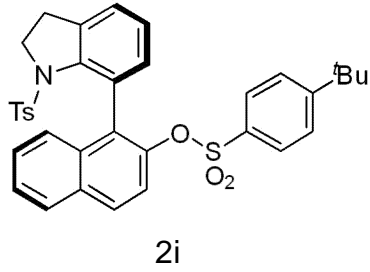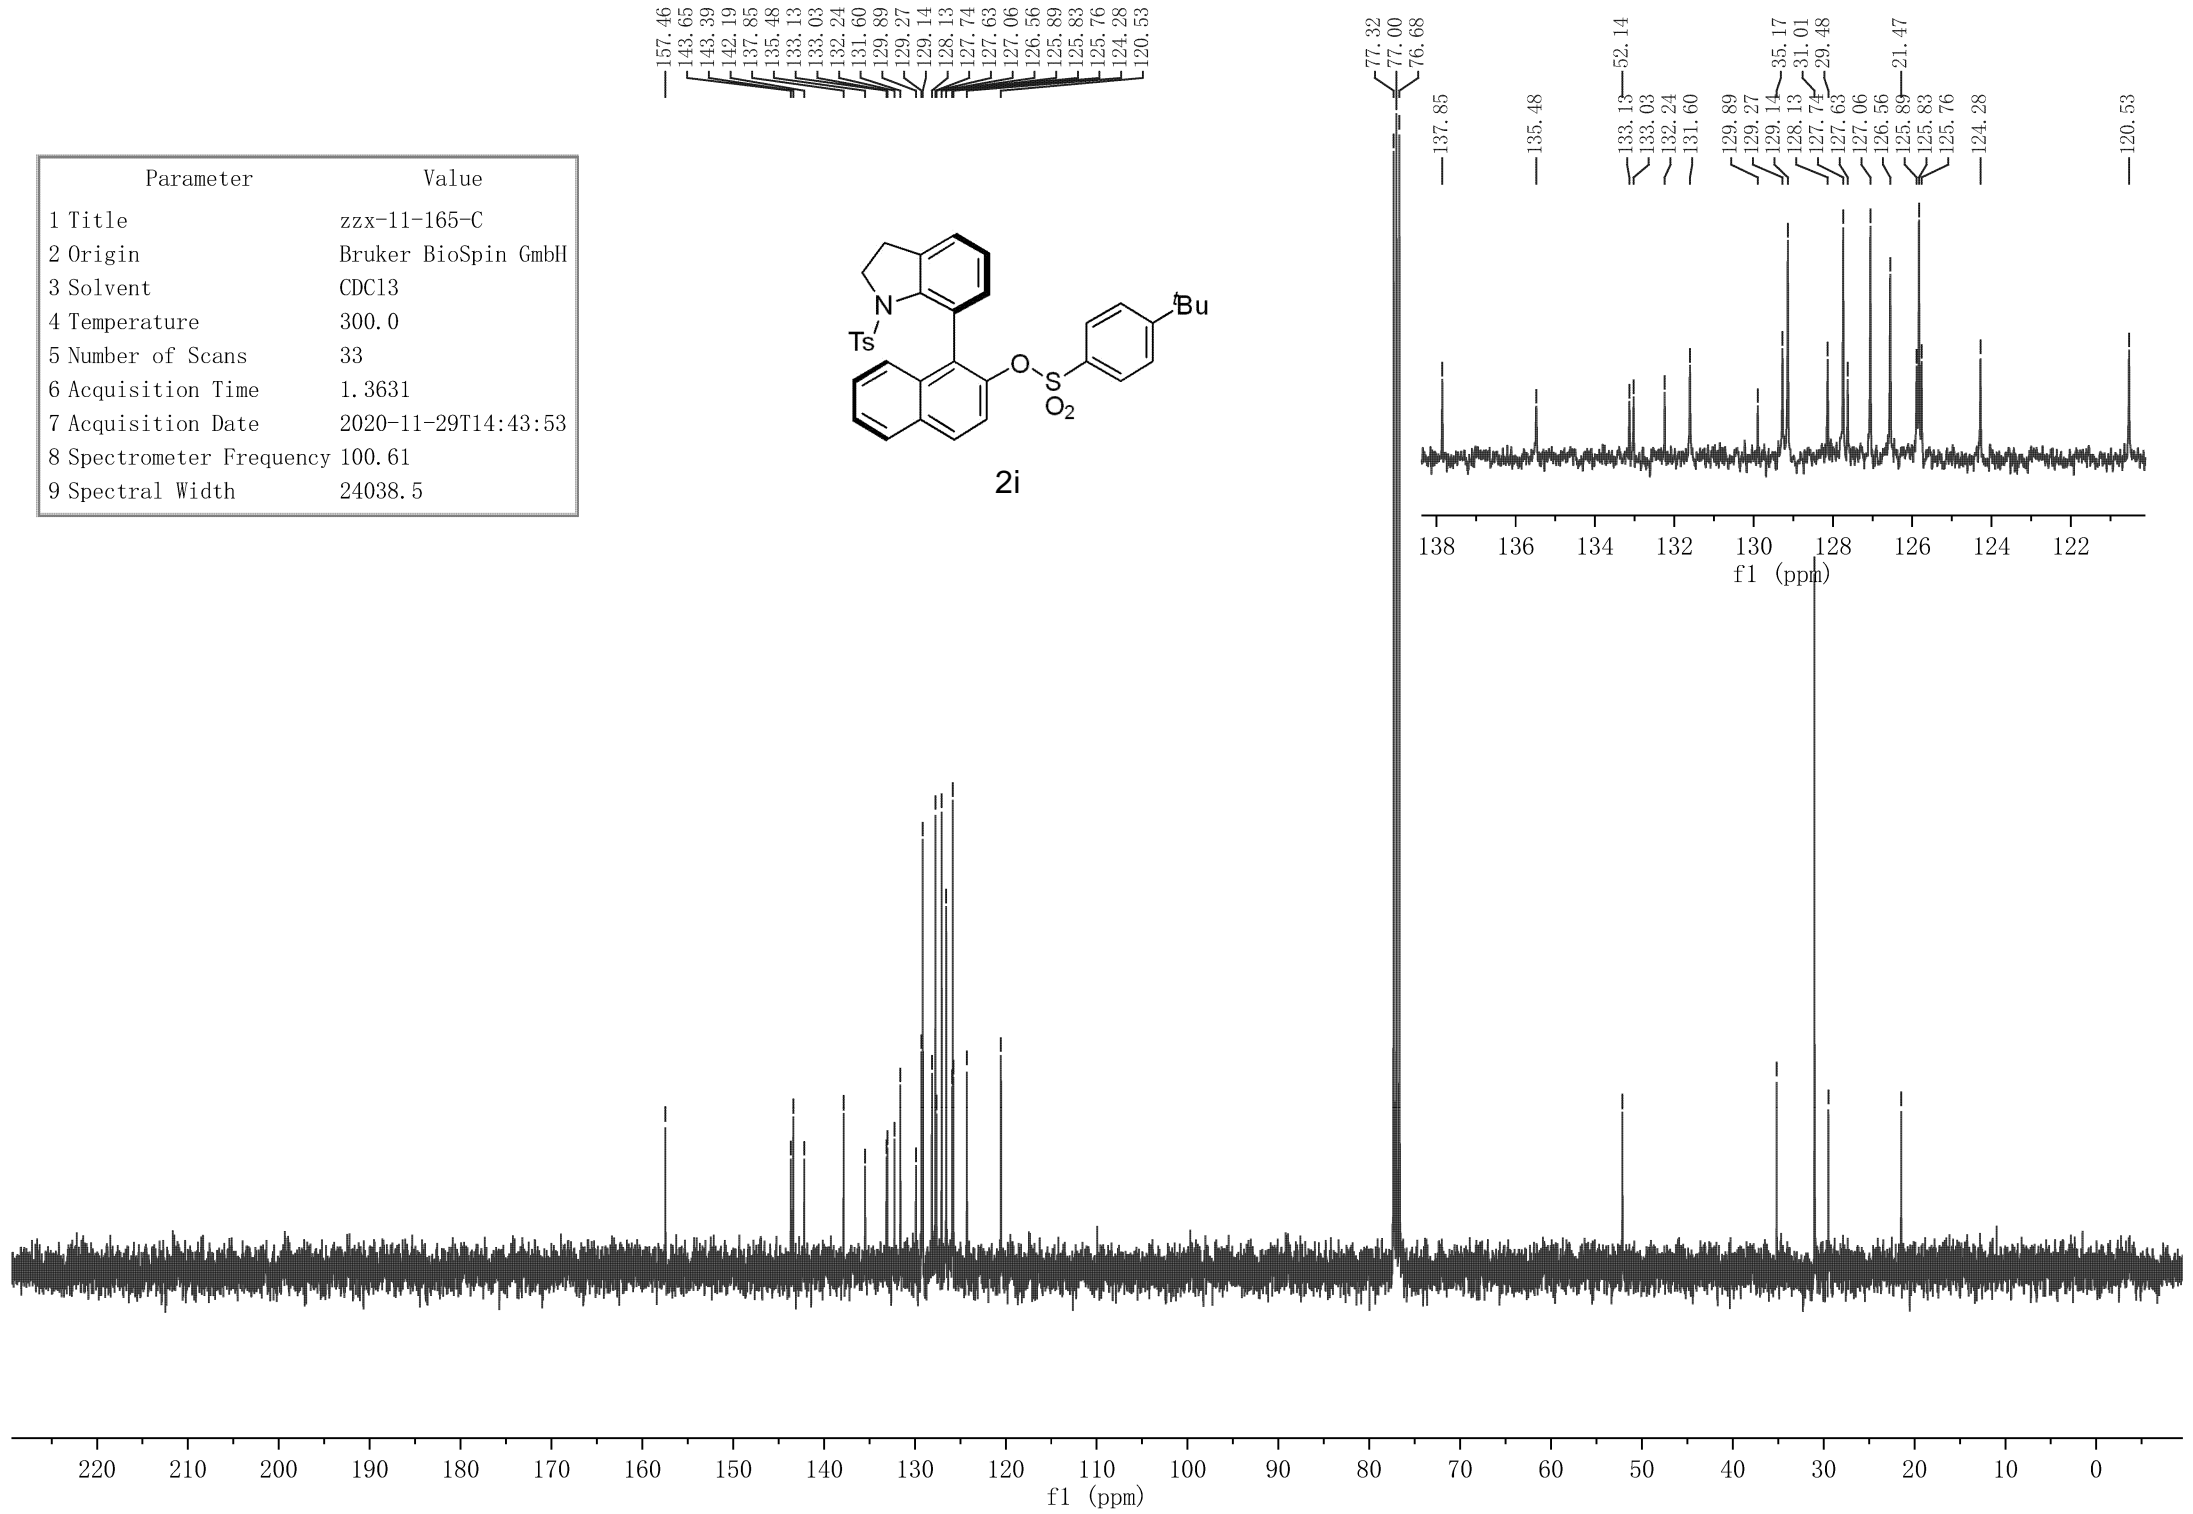

7.888  
7.860  
7.846  
7.838  
7.512  
7.490  
7.483  
7.458  
7.442  
7.436  
7.415  
7.409  
7.241  
7.224  
7.220  
7.214  
7.162  
7.157  
7.141  
7.113  
7.095  
7.076  
7.033  
7.013  
6.910  
6.907  
6.892  
6.889

4.122  
4.085  
4.071  
4.053  
3.712  
3.690  
3.660  
3.634

2.413  
2.397  
2.389  
2.369  
2.328

0.000

| Parameter                | Value               |
|--------------------------|---------------------|
| 1 Title                  | zzx-12-174-H        |
| 2 Origin                 | Bruker BioSpin GmbH |
| 3 Solvent                | CDC13               |
| 4 Temperature            | 298.0               |
| 5 Number of Scans        | 8                   |
| 6 Acquisition Time       | 4.0894              |
| 7 Acquisition Date       | 2021-03-06T16:42:37 |
| 8 Spectrometer Frequency | 400.13              |
| 9 Spectral Width         | 8012.8              |

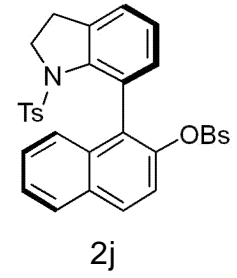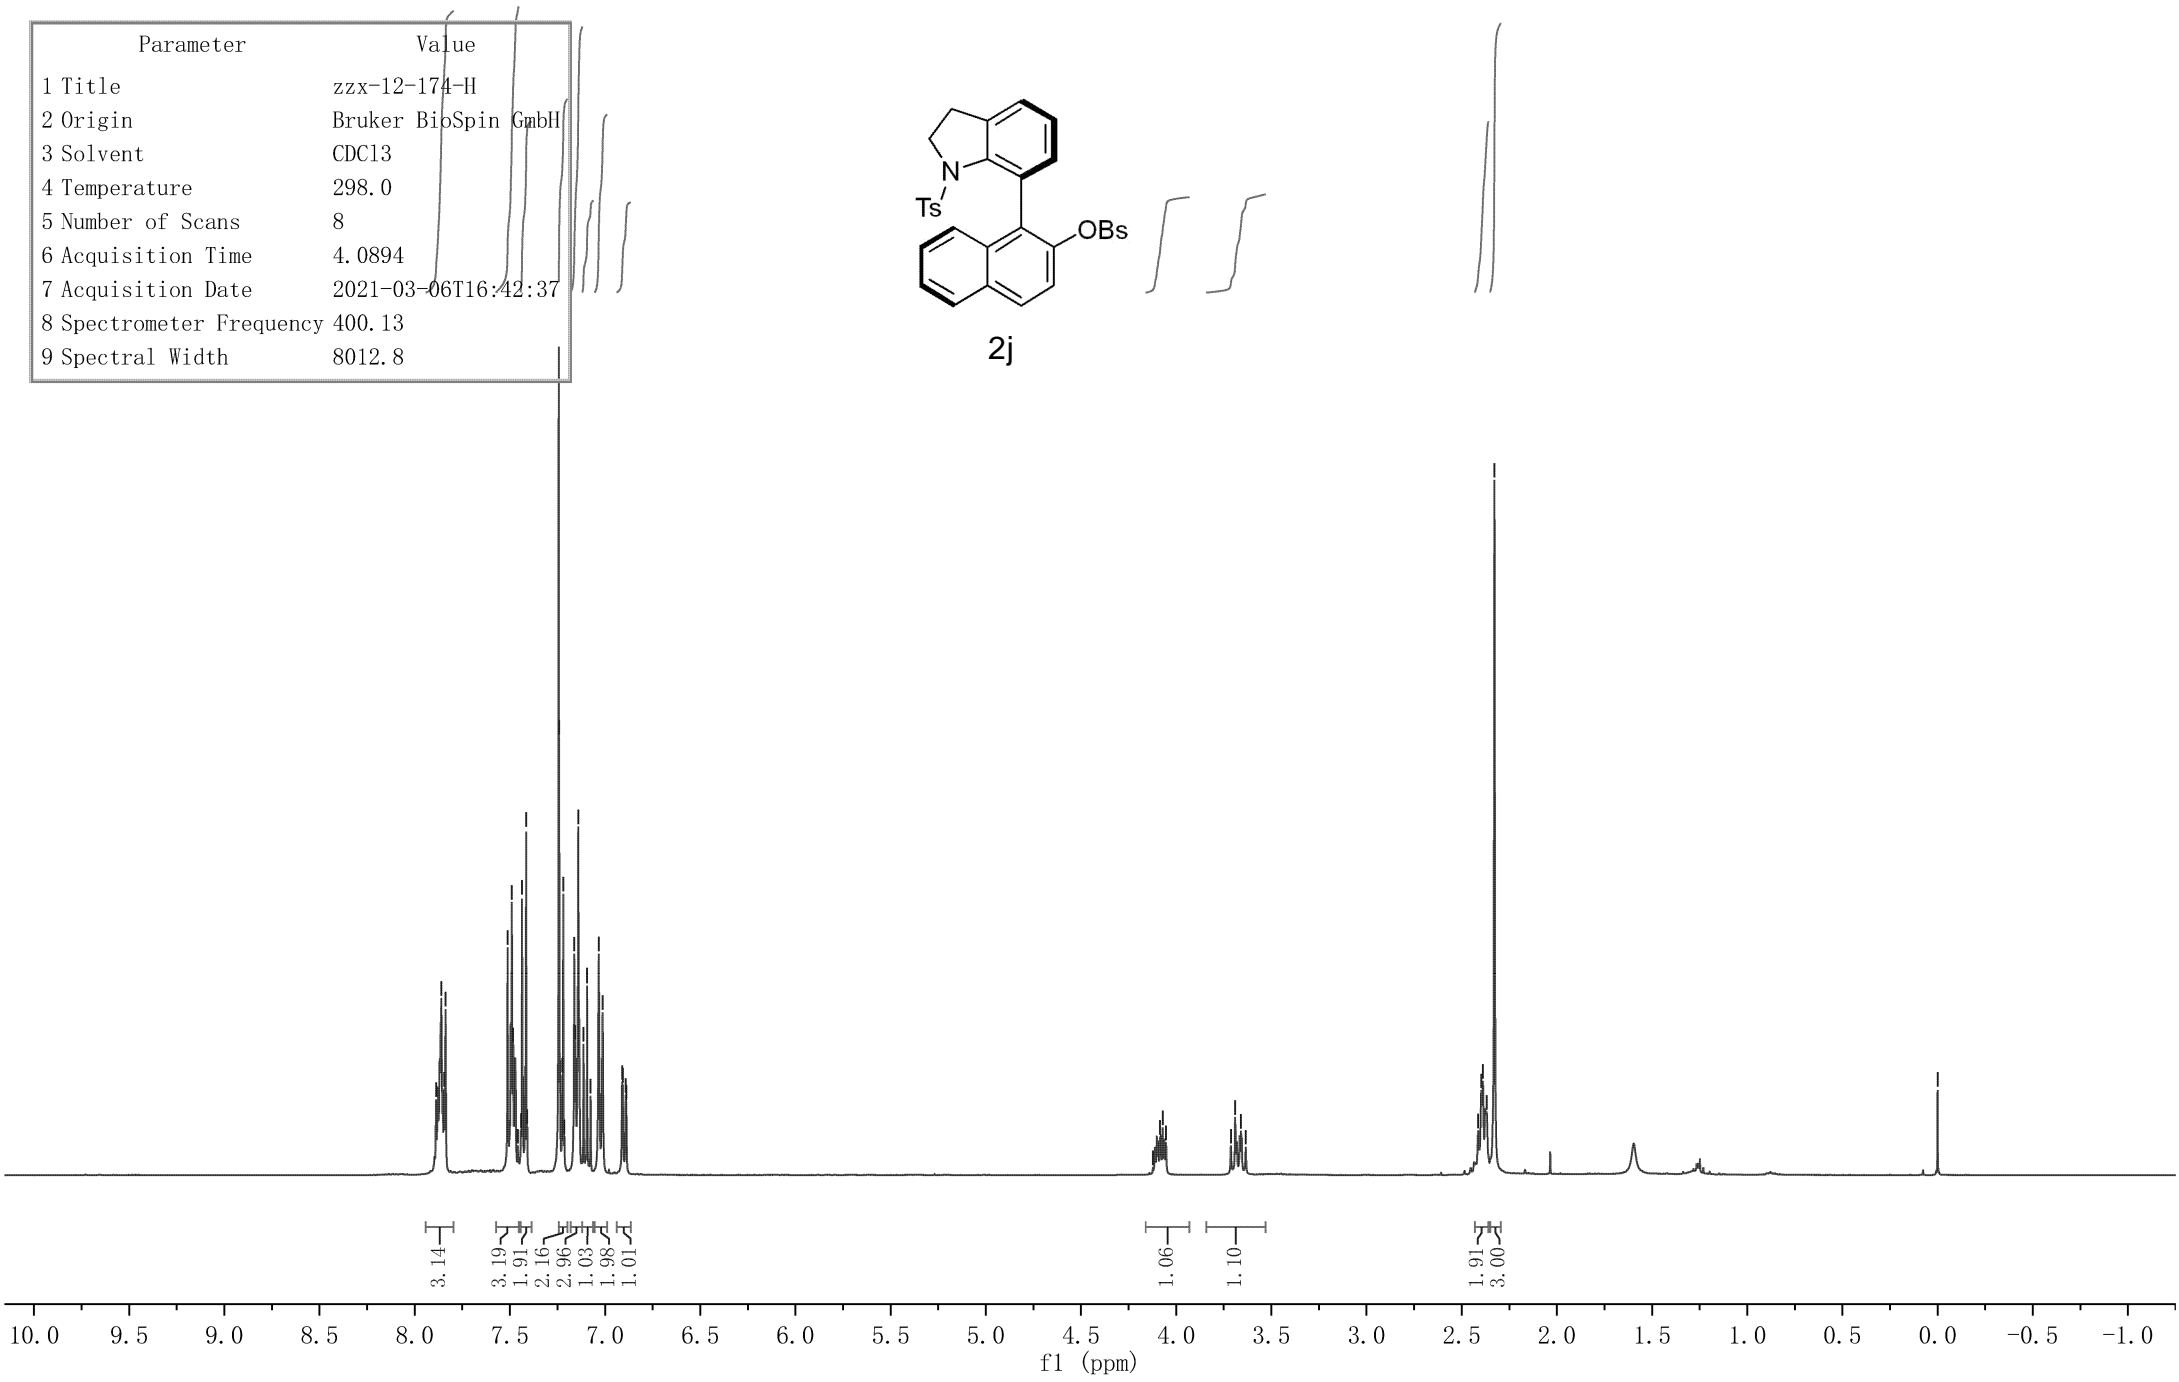

10.0 9.5 9.0 8.5 8.0 7.5 7.0 6.5 6.0 5.5 5.0 4.5 4.0 3.5 3.0 2.5 2.0 1.5 1.0 0.5 0.0 -0.5 -1.0

f1 (ppm)

| Parameter                | Value               |
|--------------------------|---------------------|
| 1 Title                  | zzx-12-174-C        |
| 2 Origin                 | Bruker BioSpin GmbH |
| 3 Solvent                | CDC13               |
| 4 Temperature            | 300.0               |
| 5 Number of Scans        | 39                  |
| 6 Acquisition Time       | 1.3631              |
| 7 Acquisition Date       | 2021-03-06T16:44:53 |
| 8 Spectrometer Frequency | 100.61              |
| 9 Spectral Width         | 24038.5             |

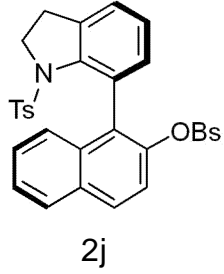

143.51  
143.34  
142.17  
137.95  
135.32  
134.93  
132.96  
132.16  
131.53  
129.79  
129.41  
129.23  
129.17  
128.78  
128.16  
127.32  
127.01  
126.70  
126.52  
125.95  
125.87  
124.40  
120.43

77.32  
77.00  
76.68  
135.32  
134.93  
132.96  
132.31  
132.16  
131.53  
129.79  
129.41  
129.23  
129.17  
128.78  
128.16  
127.32  
127.01  
126.70  
126.52  
125.95  
125.87  
124.40

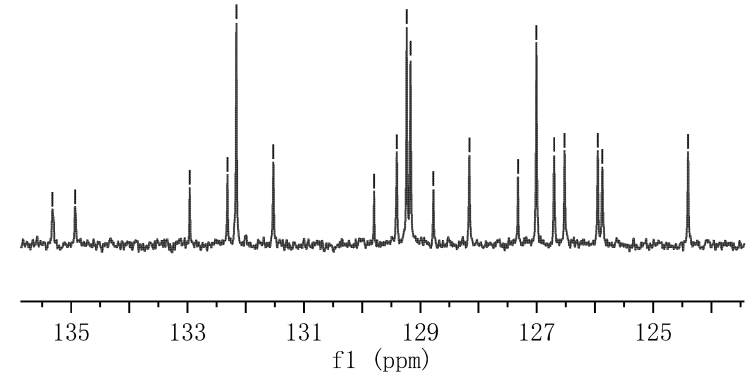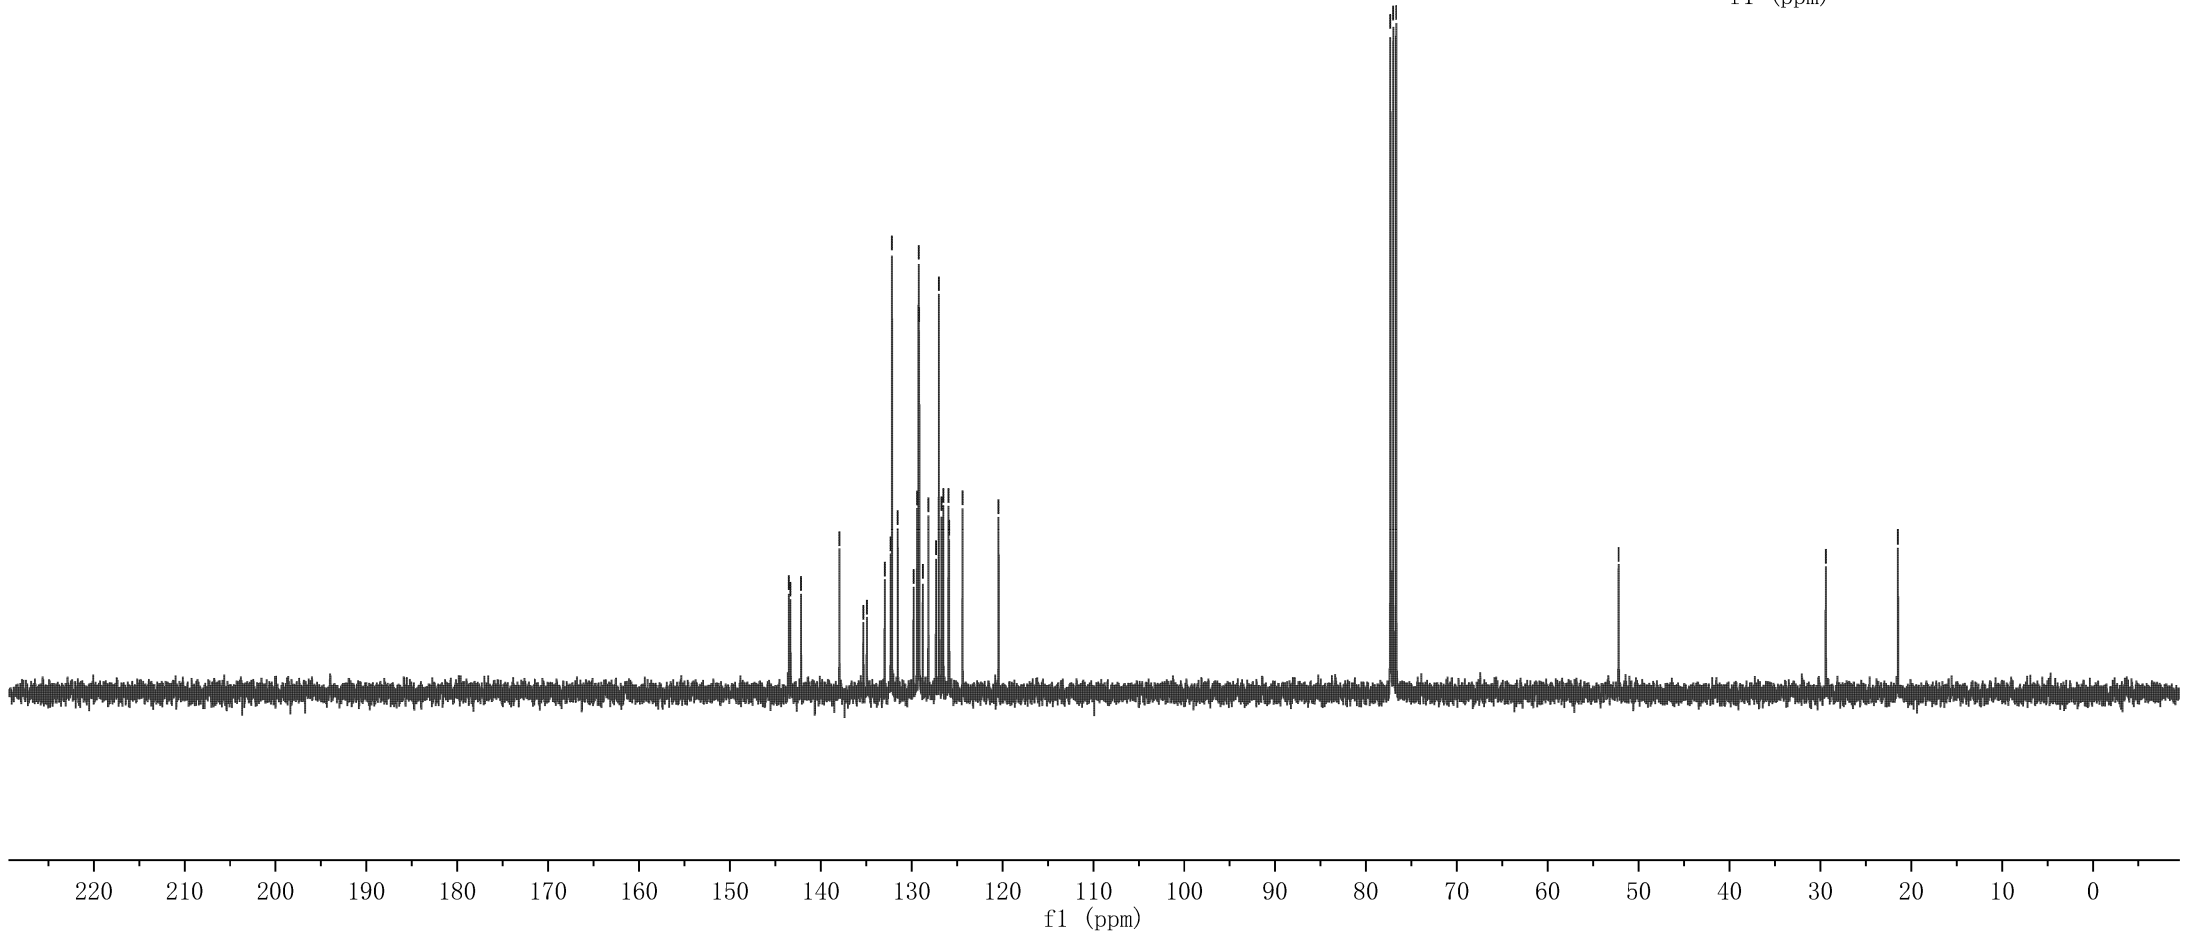

8.102  
8.080  
7.892  
7.874  
7.852  
7.830  
7.563  
7.541  
7.499  
7.482  
7.147  
7.127  
7.051  
7.034  
7.031  
7.016  
6.997  
6.846  
6.827

4.121  
4.094  
4.072  
4.063  
3.768  
3.747  
3.712  
3.690

2.441  
2.415  
2.395  
2.372  
2.331

0.000

| Parameter                | Value               |
|--------------------------|---------------------|
| 1 Title                  | zzx-12-124-H        |
| 2 Origin                 | Bruker BioSpin GmbH |
| 3 Solvent                | CDC13               |
| 4 Temperature            | 298.0               |
| 5 Number of Scans        | 7                   |
| 6 Acquisition Time       | 4.0894              |
| 7 Acquisition Date       | 2021-01-29T16:37:26 |
| 8 Spectrometer Frequency | 400.13              |
| 9 Spectral Width         | 8012.8              |

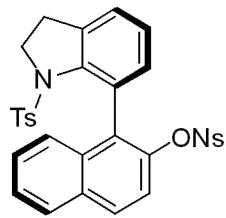

2k

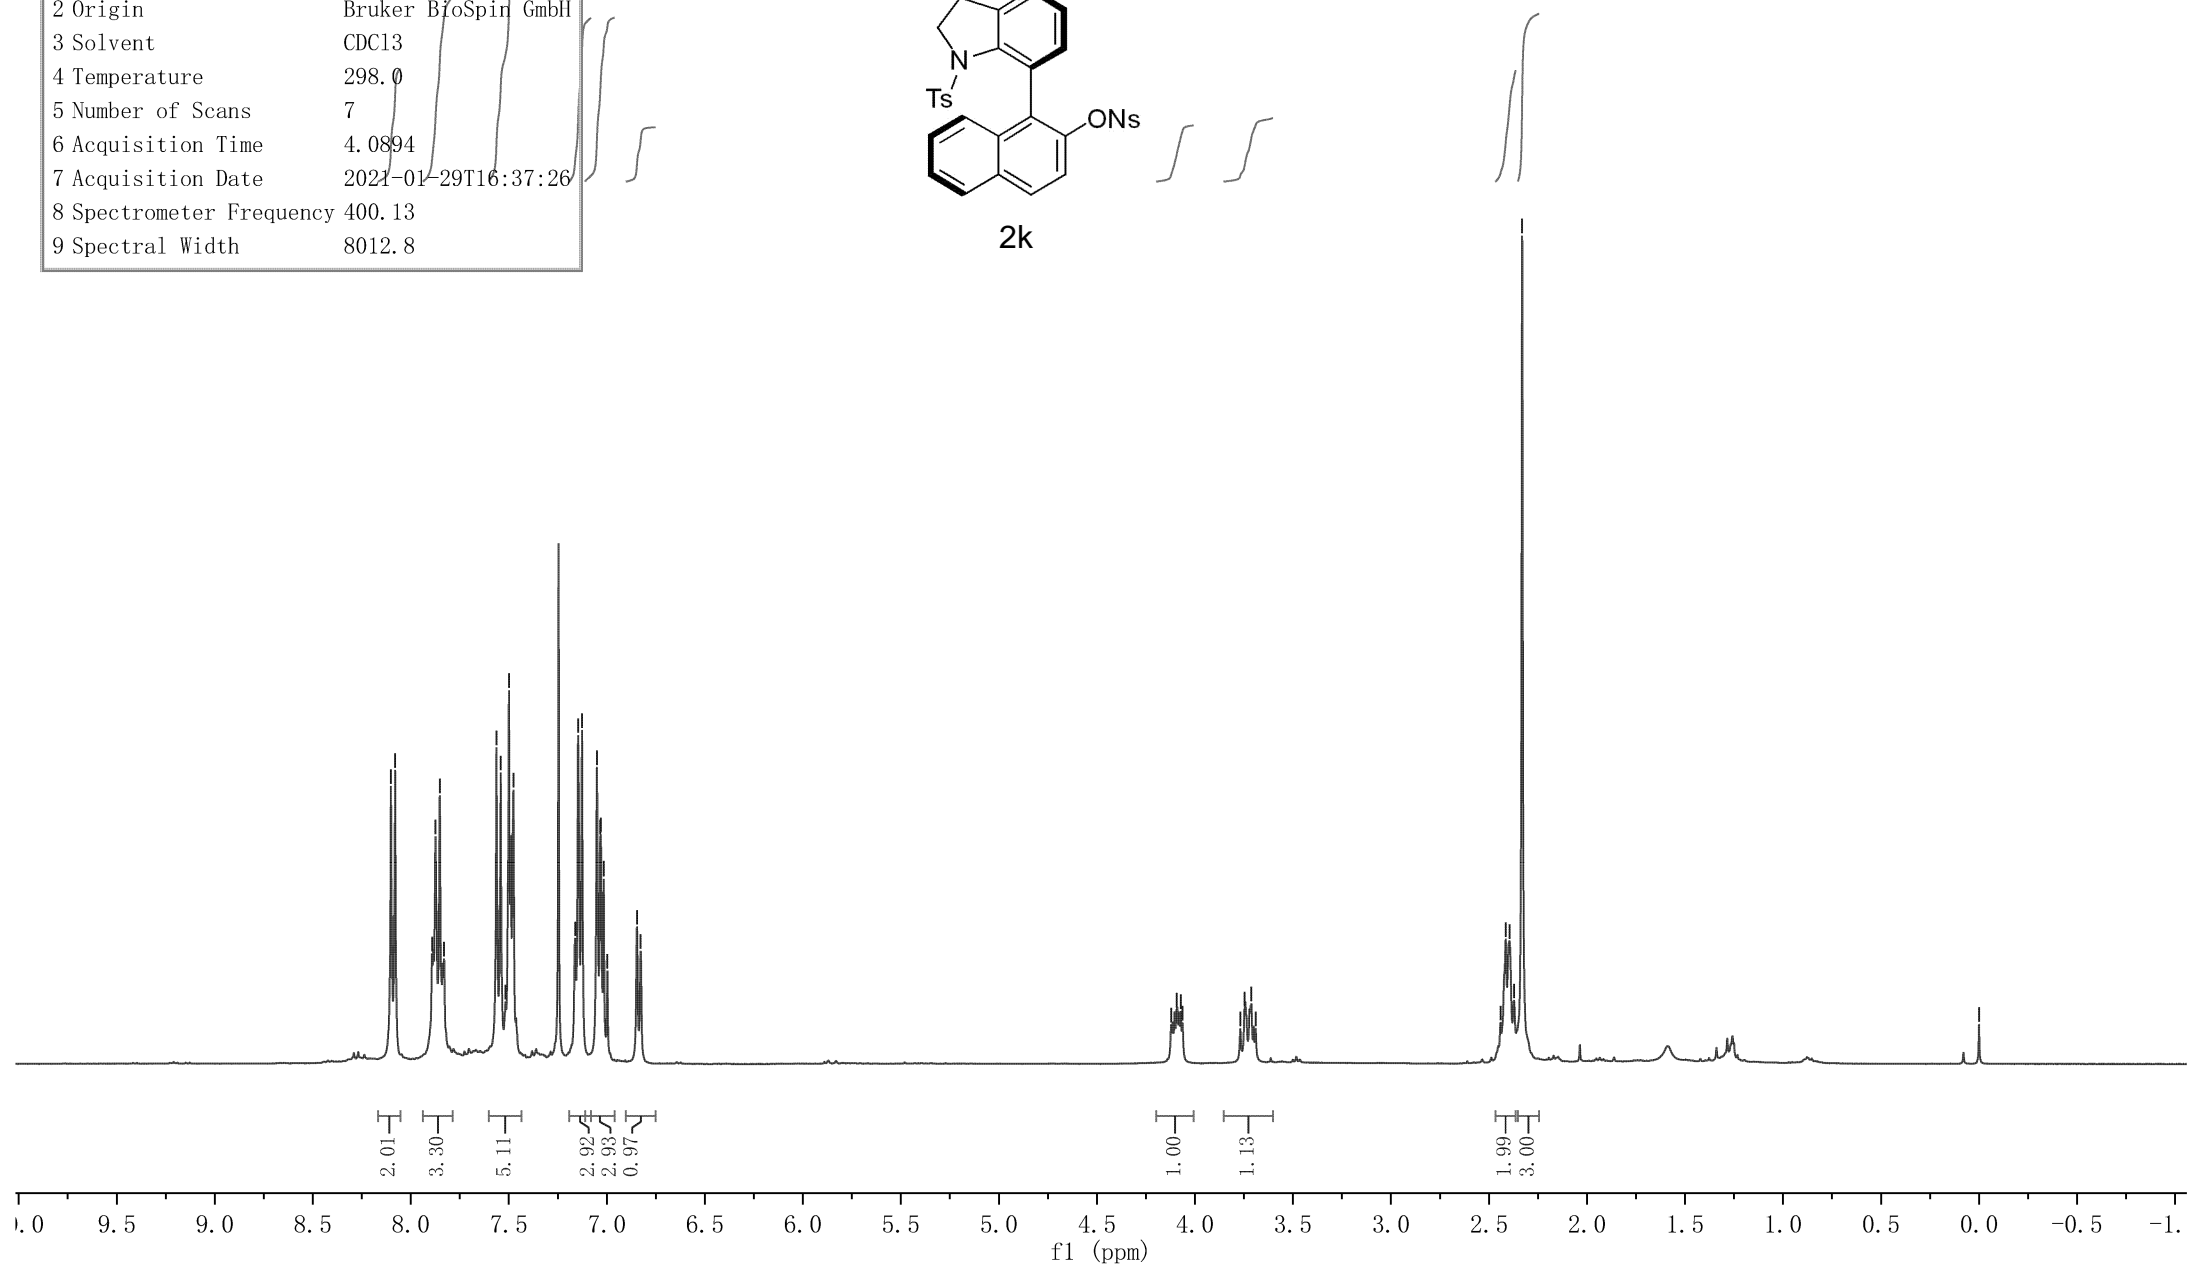

| Parameter                | Value               |
|--------------------------|---------------------|
| 1 Title                  | zzx-12-124-C        |
| 2 Origin                 | Bruker BioSpin GmbH |
| 3 Solvent                | CDC13               |
| 4 Temperature            | 300.0               |
| 5 Number of Scans        | 29                  |
| 6 Acquisition Time       | 1.3631              |
| 7 Acquisition Date       | 2021-01-29T16:38:34 |
| 8 Spectrometer Frequency | 100.61              |
| 9 Spectral Width         | 24038.5             |



2k

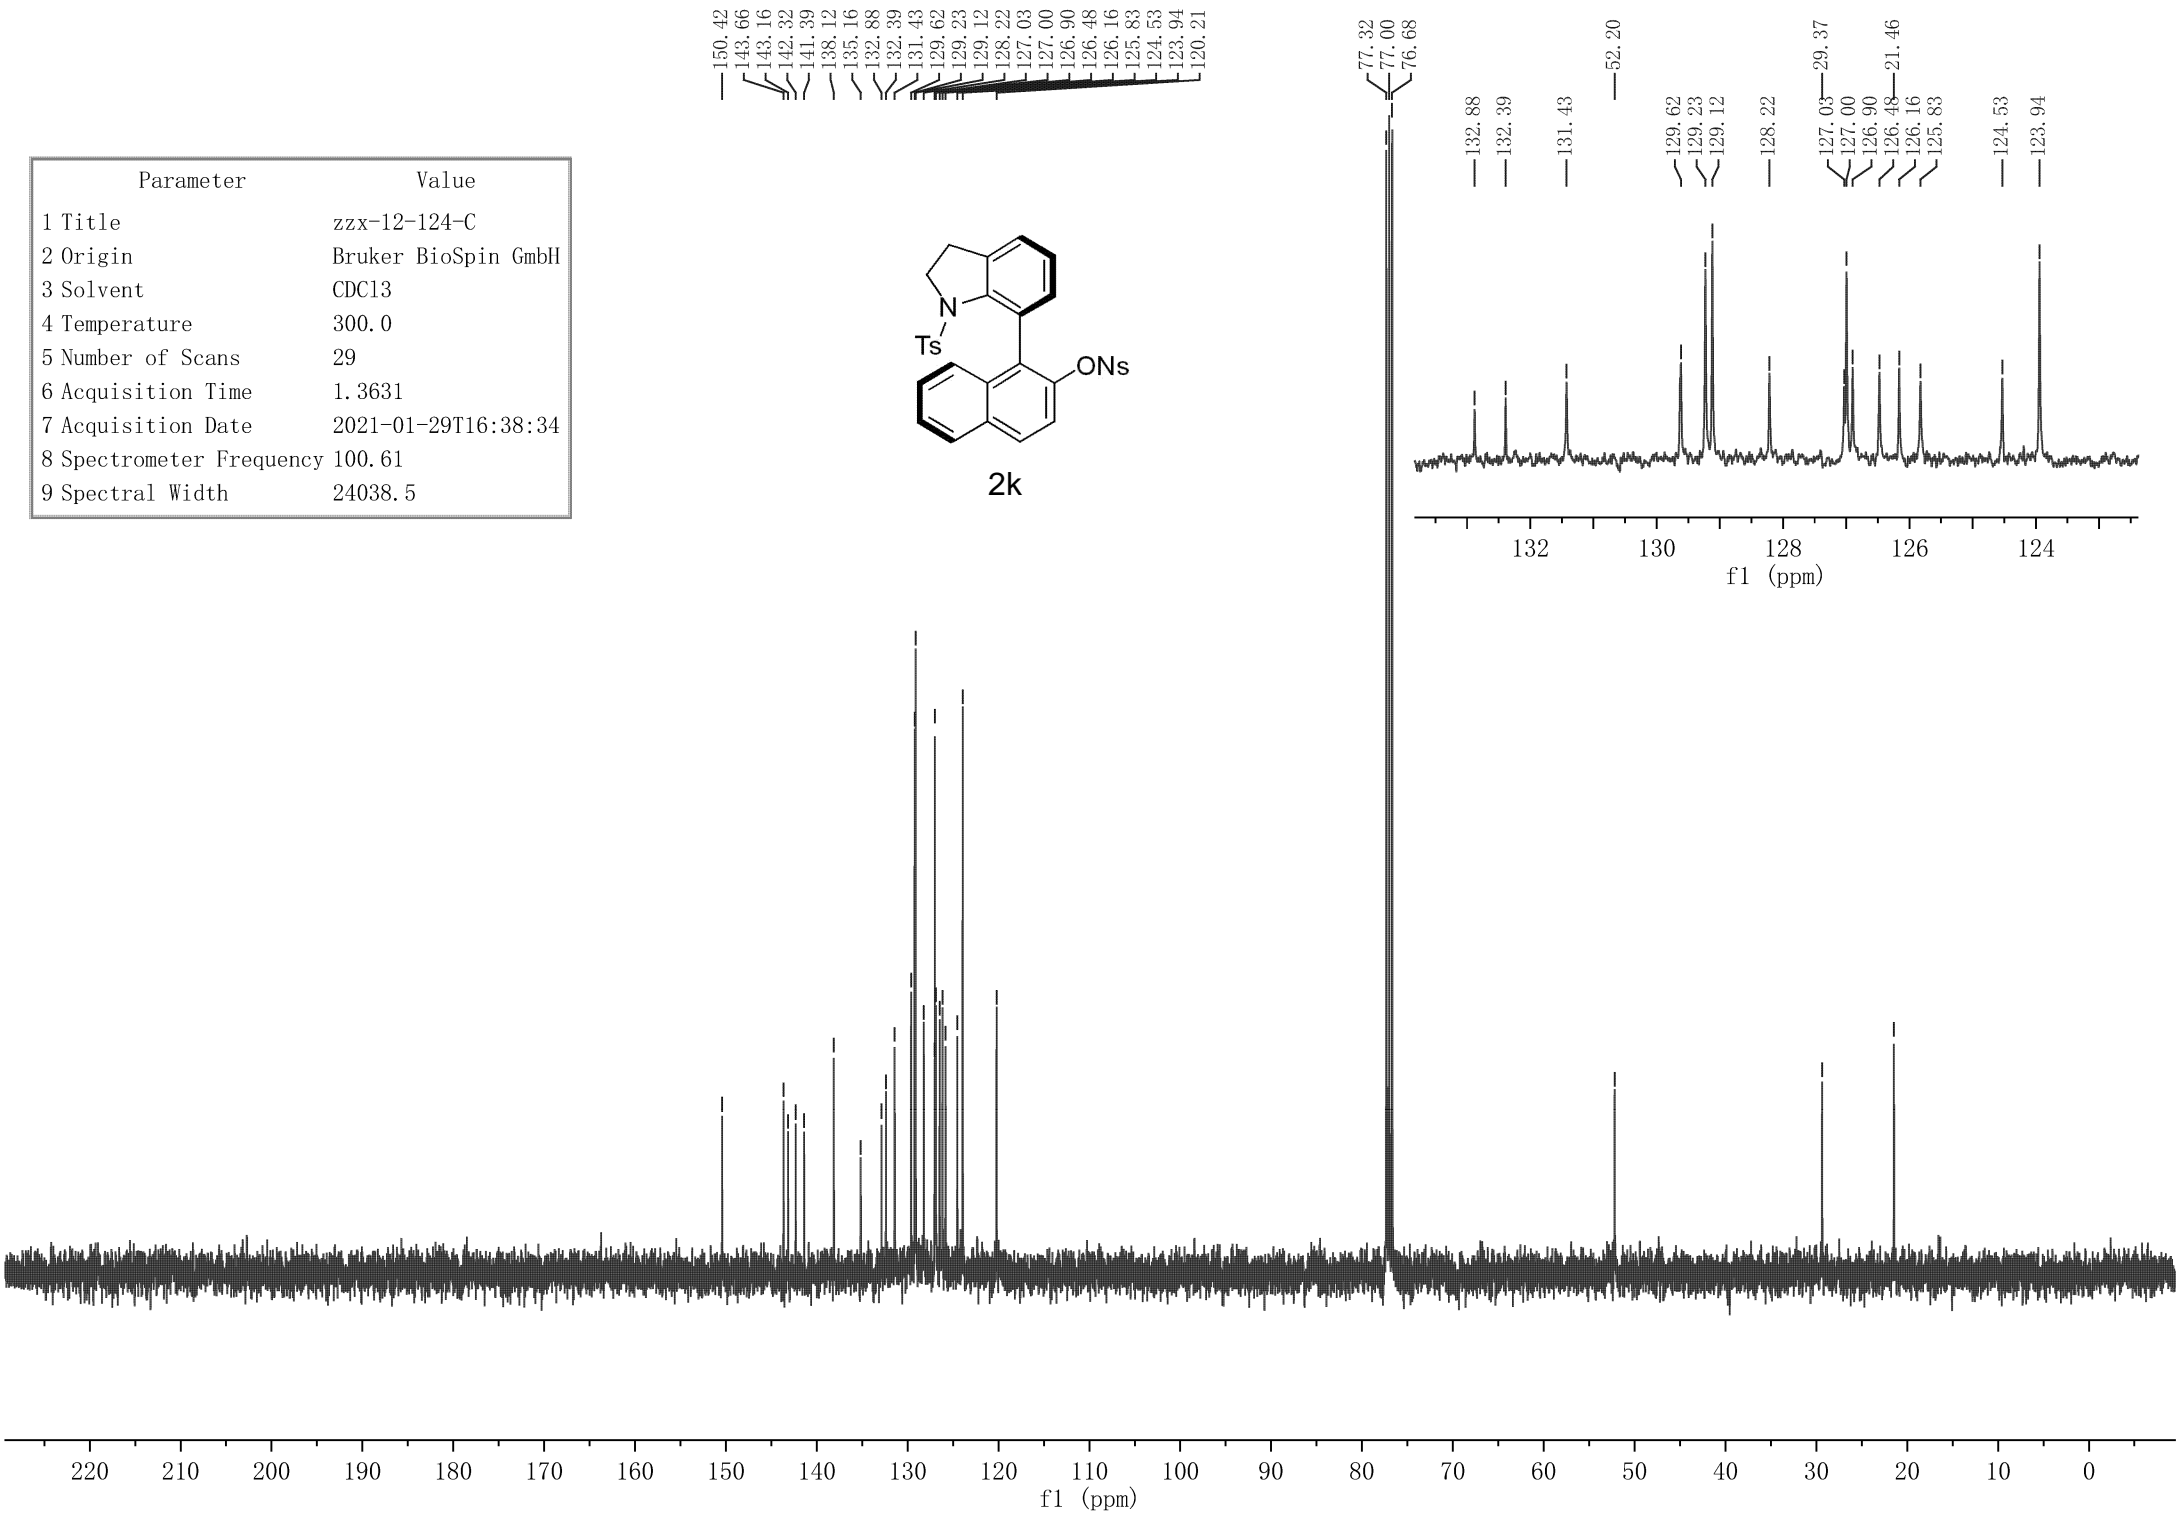

7.885  
7.862  
7.835  
7.813  
7.697  
7.677  
7.637  
7.617  
7.559  
7.505  
7.487  
7.456  
7.378  
7.355  
7.209  
7.193  
7.189  
7.189  
7.074  
7.054  
7.030  
7.027  
6.896  
6.877  
6.859  
6.793  
6.774

4.170  
4.139  
4.129  
4.111  
4.048  
4.026  
4.002  
3.971

2.501  
2.475  
2.453  
2.427  
2.337

0.000

| Parameter                | Value               |
|--------------------------|---------------------|
| 1 Title                  | zzx-12-101-H        |
| 2 Origin                 | Bruker BioSpin GmbH |
| 3 Solvent                | CDC13               |
| 4 Temperature            | 298.0               |
| 5 Number of Scans        | 10                  |
| 6 Acquisition Time       | 4.0894              |
| 7 Acquisition Date       | 2021-01-29T16:53:14 |
| 8 Spectrometer Frequency | 400.13              |
| 9 Spectral Width         | 8012.8              |

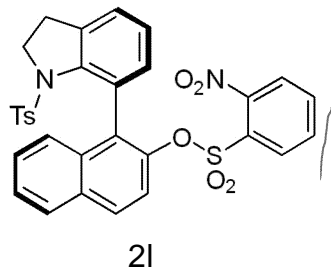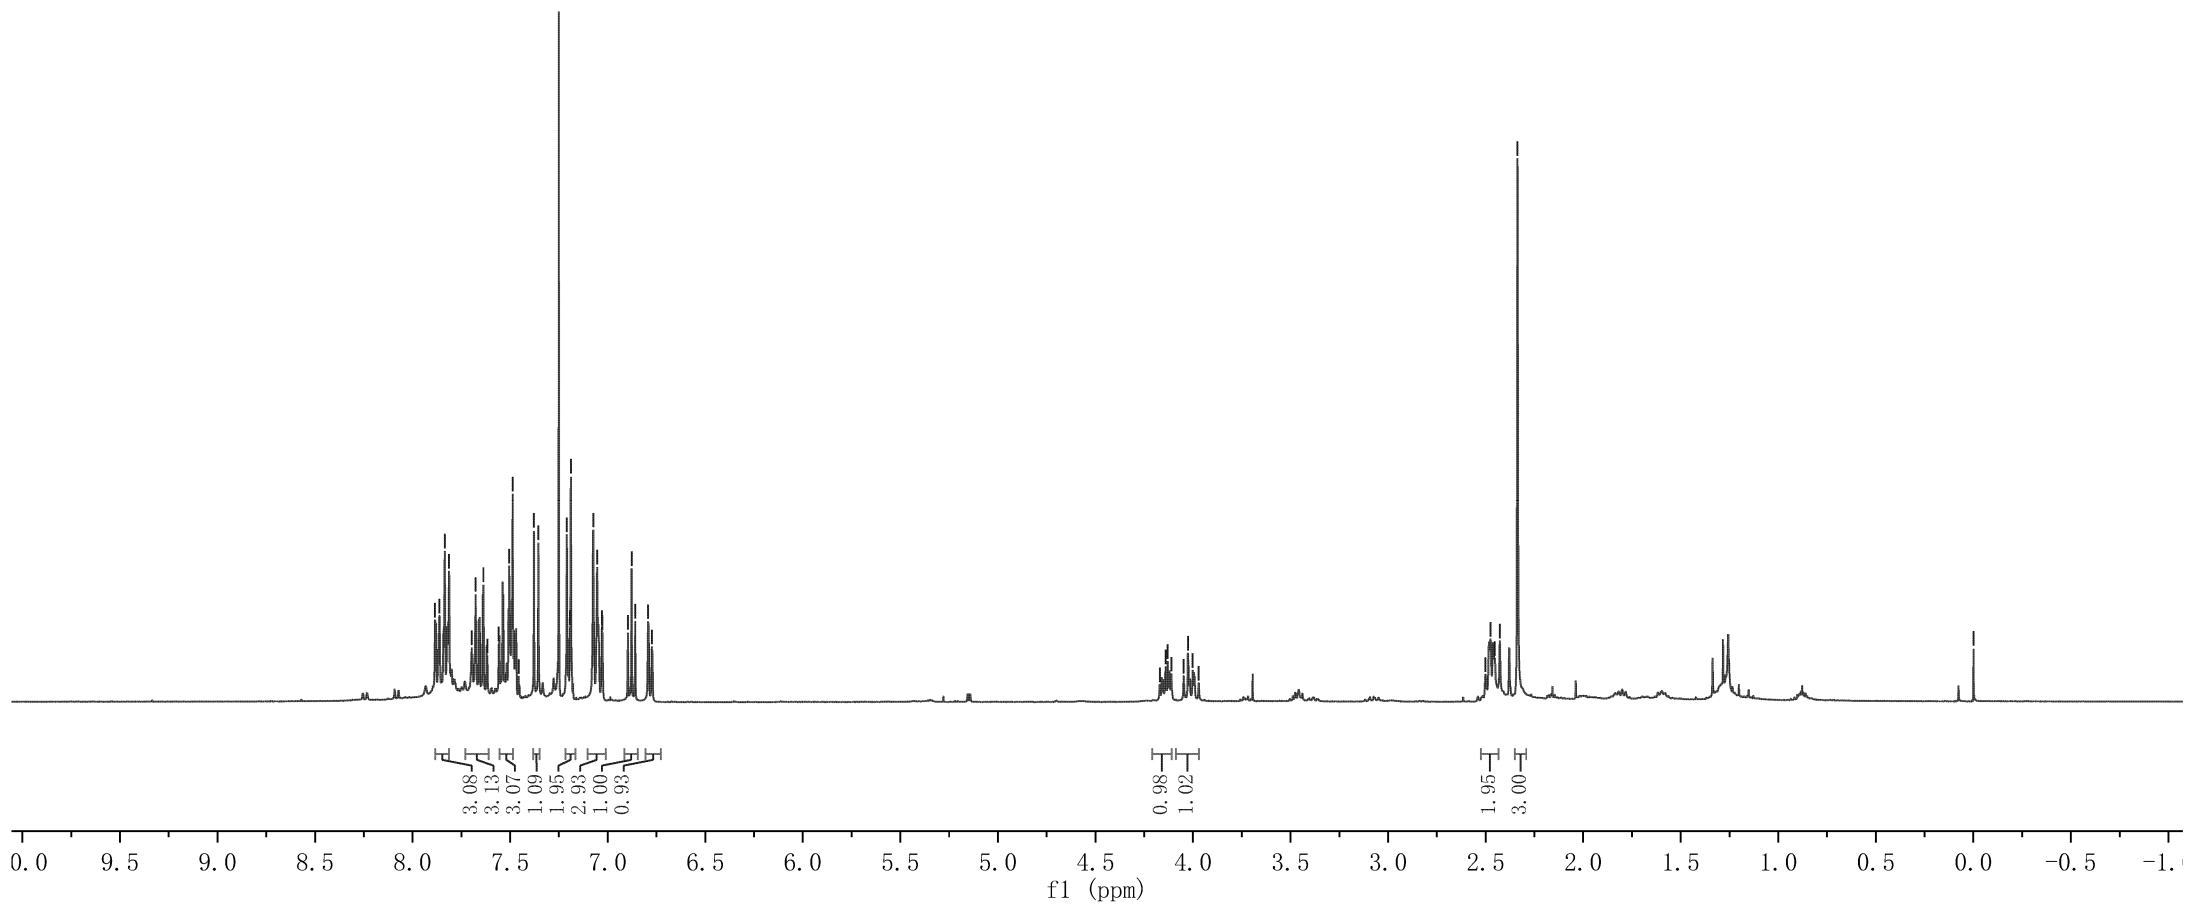

| Parameter                | Value               |
|--------------------------|---------------------|
| 1 Title                  | zzx-12-101-C        |
| 2 Origin                 | Bruker BioSpin GmbH |
| 3 Solvent                | CDC13               |
| 4 Temperature            | 300.0               |
| 5 Number of Scans        | 100                 |
| 6 Acquisition Time       | 1.3631              |
| 7 Acquisition Date       | 2021-01-29T16:54:56 |
| 8 Spectrometer Frequency | 100.62              |
| 9 Spectral Width         | 24038.5             |

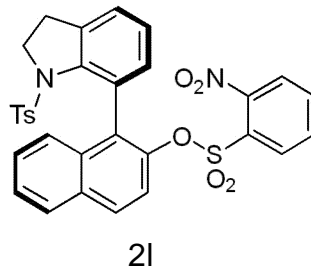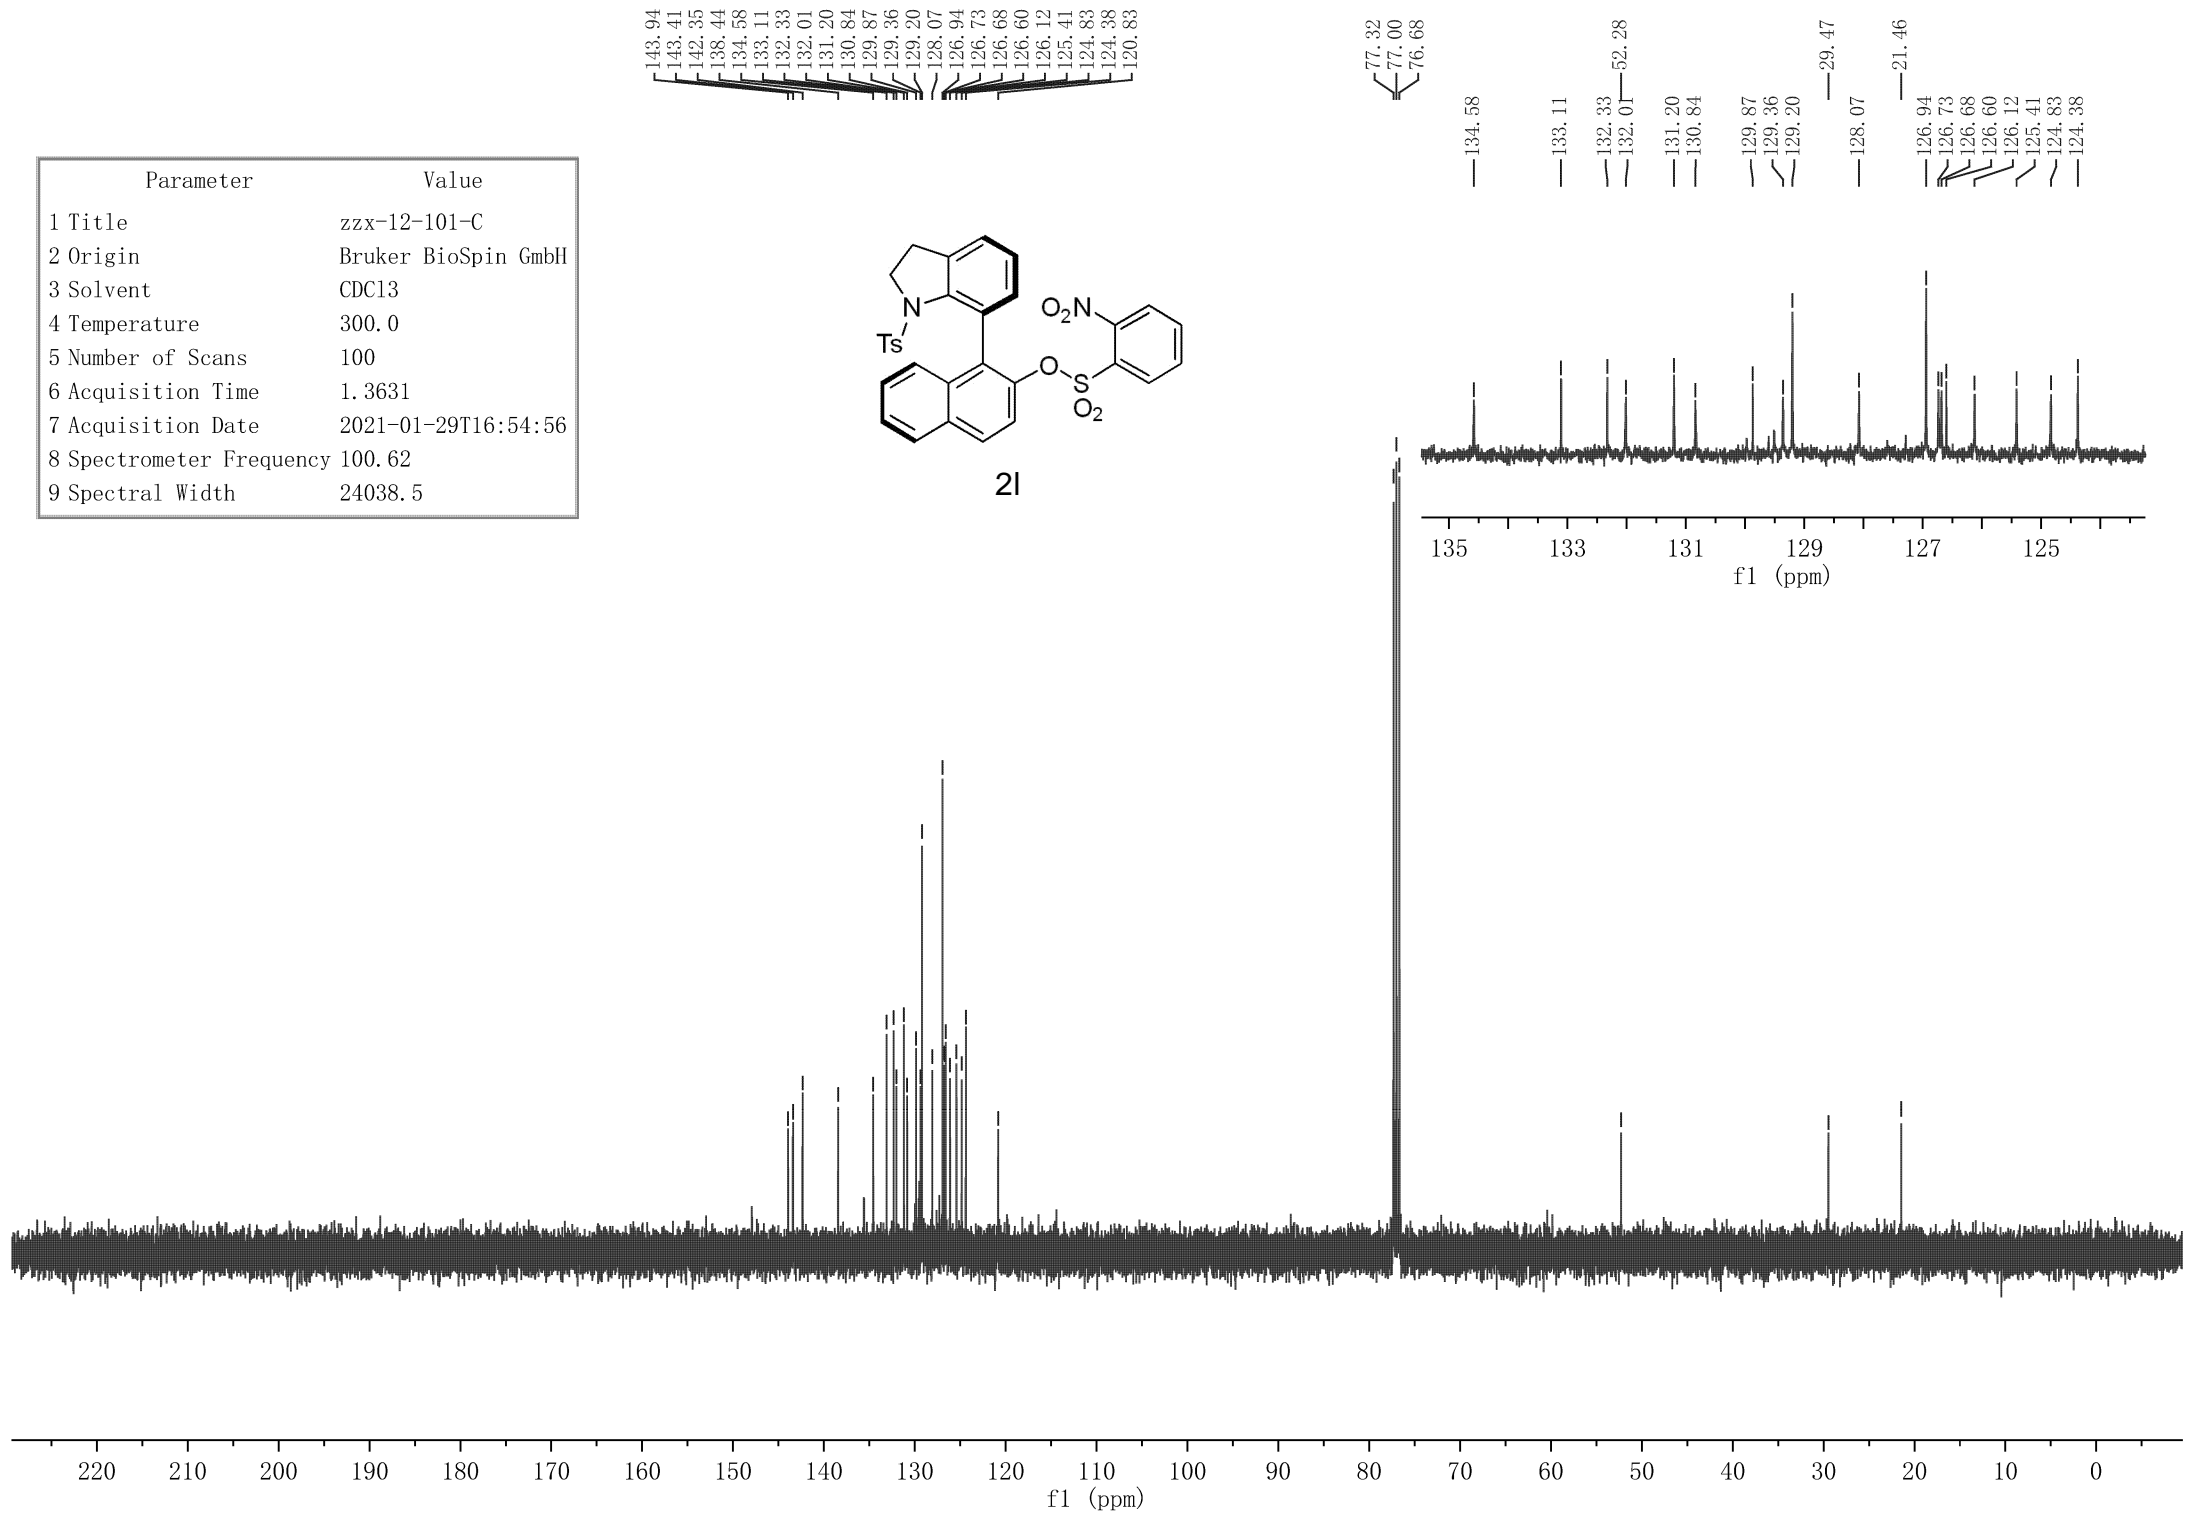

8.566  
8.553  
8.542  
8.031  
8.010  
7.879  
7.850  
7.832  
7.829  
7.789  
7.767  
7.571  
7.556  
7.536  
7.520  
7.482  
7.447  
7.442  
7.411  
7.376  
7.356  
7.346  
7.337  
7.324  
7.116  
7.096  
6.974  
6.954  
6.876  
6.859  
6.827  
6.809  
6.790  
6.746  
6.728

3.984  
3.956  
3.946  
3.926  
3.423  
3.403  
3.372  
3.346

2.360  
2.303  
2.266  
2.250  
2.227  
2.053  
2.026  
2.008  
1.988

— 0.000

| Parameter                | Value               |
|--------------------------|---------------------|
| 1 Title                  | zzx-11-135-H        |
| 2 Origin                 | Bruker BioSpin GmbH |
| 3 Solvent                | CDC13               |
| 4 Temperature            | 298.0               |
| 5 Number of Scans        | 5                   |
| 6 Acquisition Time       | 4.0894              |
| 7 Acquisition Date       | 2020-11-21T21:30:59 |
| 8 Spectrometer Frequency | 400.13              |
| 9 Spectral Width         | 8012.8              |

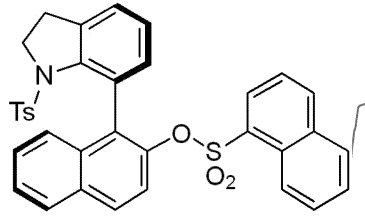

2m

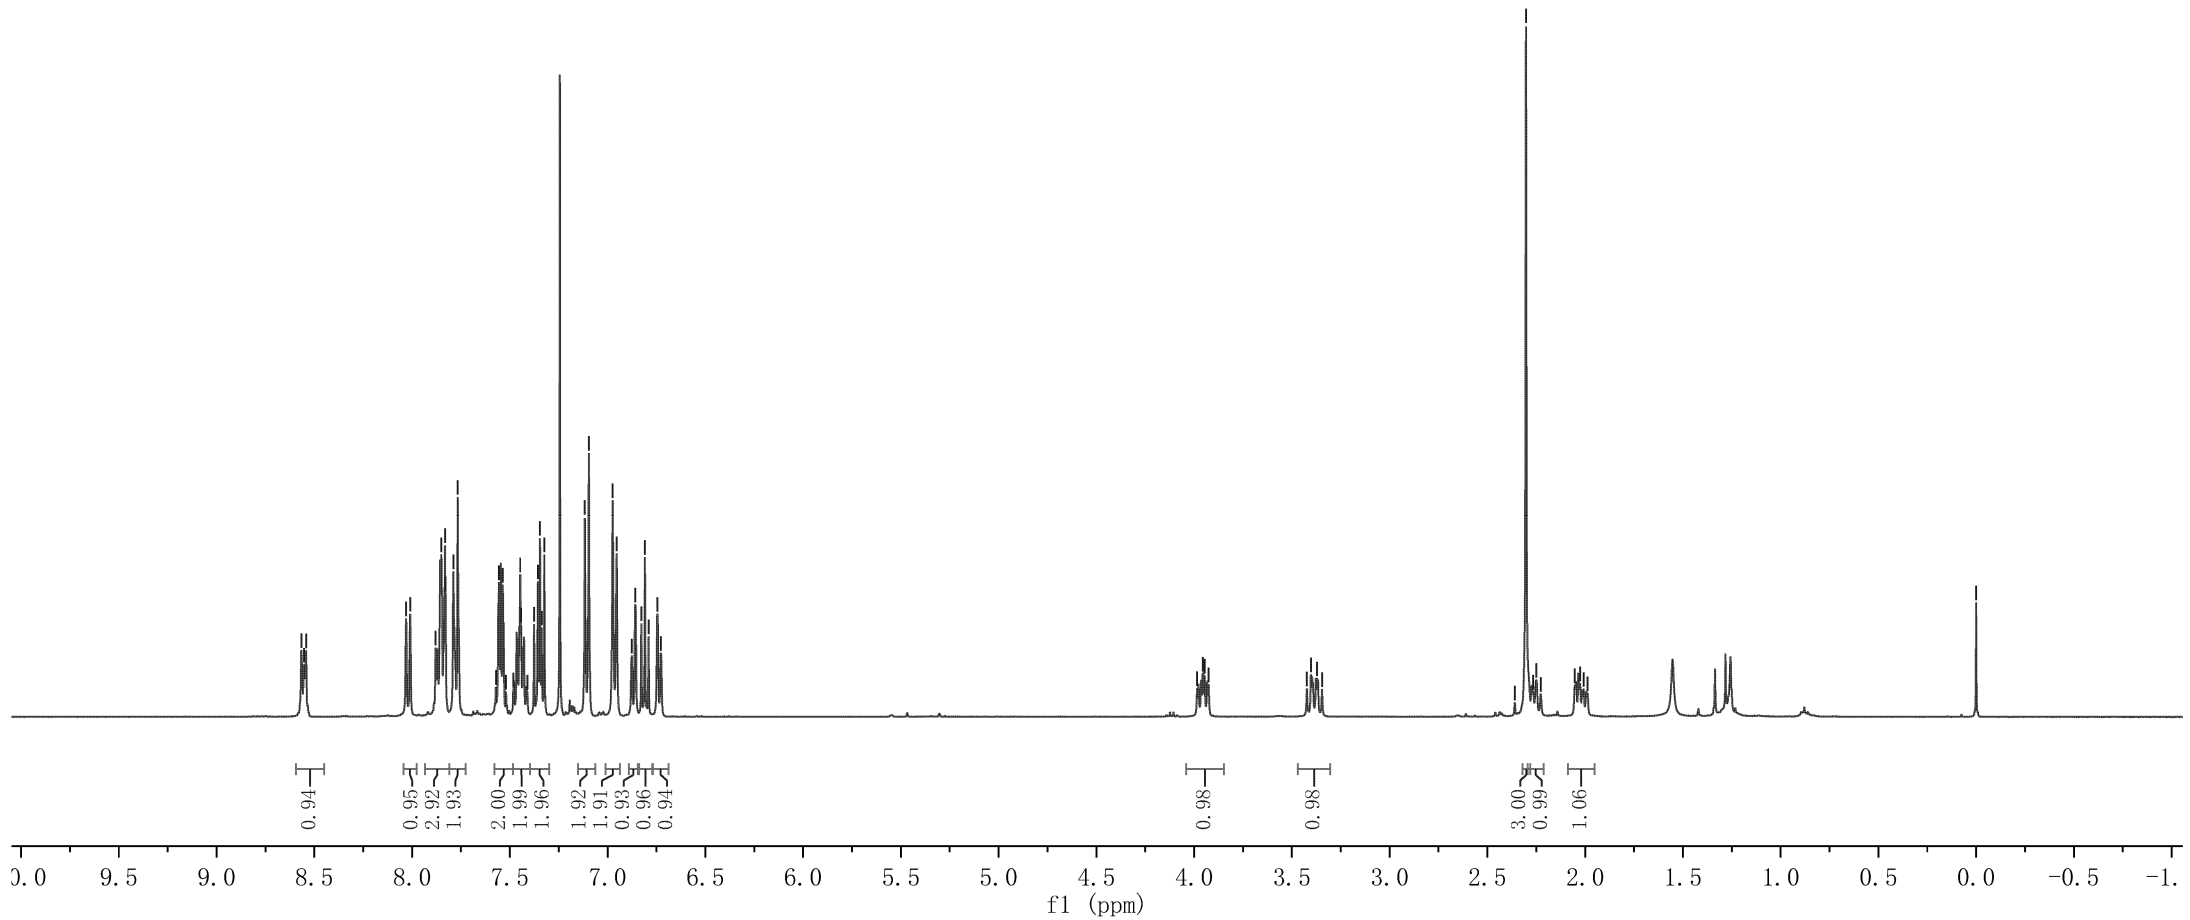



| Parameter                | Value               |
|--------------------------|---------------------|
| 1 Title                  | zzx-11-135-C        |
| 2 Origin                 | Bruker BioSpin GmbH |
| 3 Solvent                | CDC13               |
| 4 Temperature            | 300.0               |
| 5 Number of Scans        | 71                  |
| 6 Acquisition Time       | 1.3631              |
| 7 Acquisition Date       | 2020-11-21T21:32:26 |
| 8 Spectrometer Frequency | 100.61              |
| 9 Spectral Width         | 24038.5             |

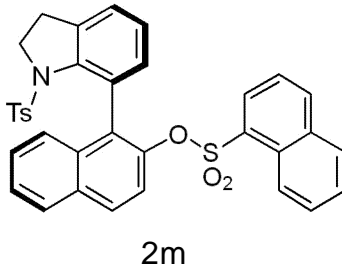

144.03  
143.26  
141.62  
137.33  
135.57  
134.99  
134.06  
133.20  
132.43  
132.19  
131.42  
129.95  
129.77  
129.12  
129.06  
128.58  
128.41  
128.26  
128.04  
126.95  
126.92  
126.84  
126.64  
126.45  
126.45  
125.79  
125.28  
125.05  
125.05  
124.09  
123.95  
121.02

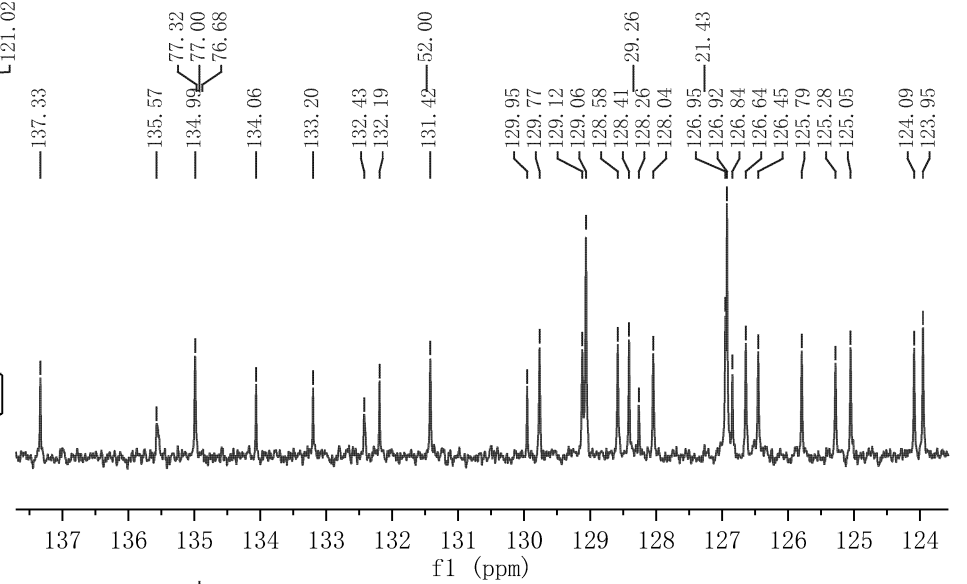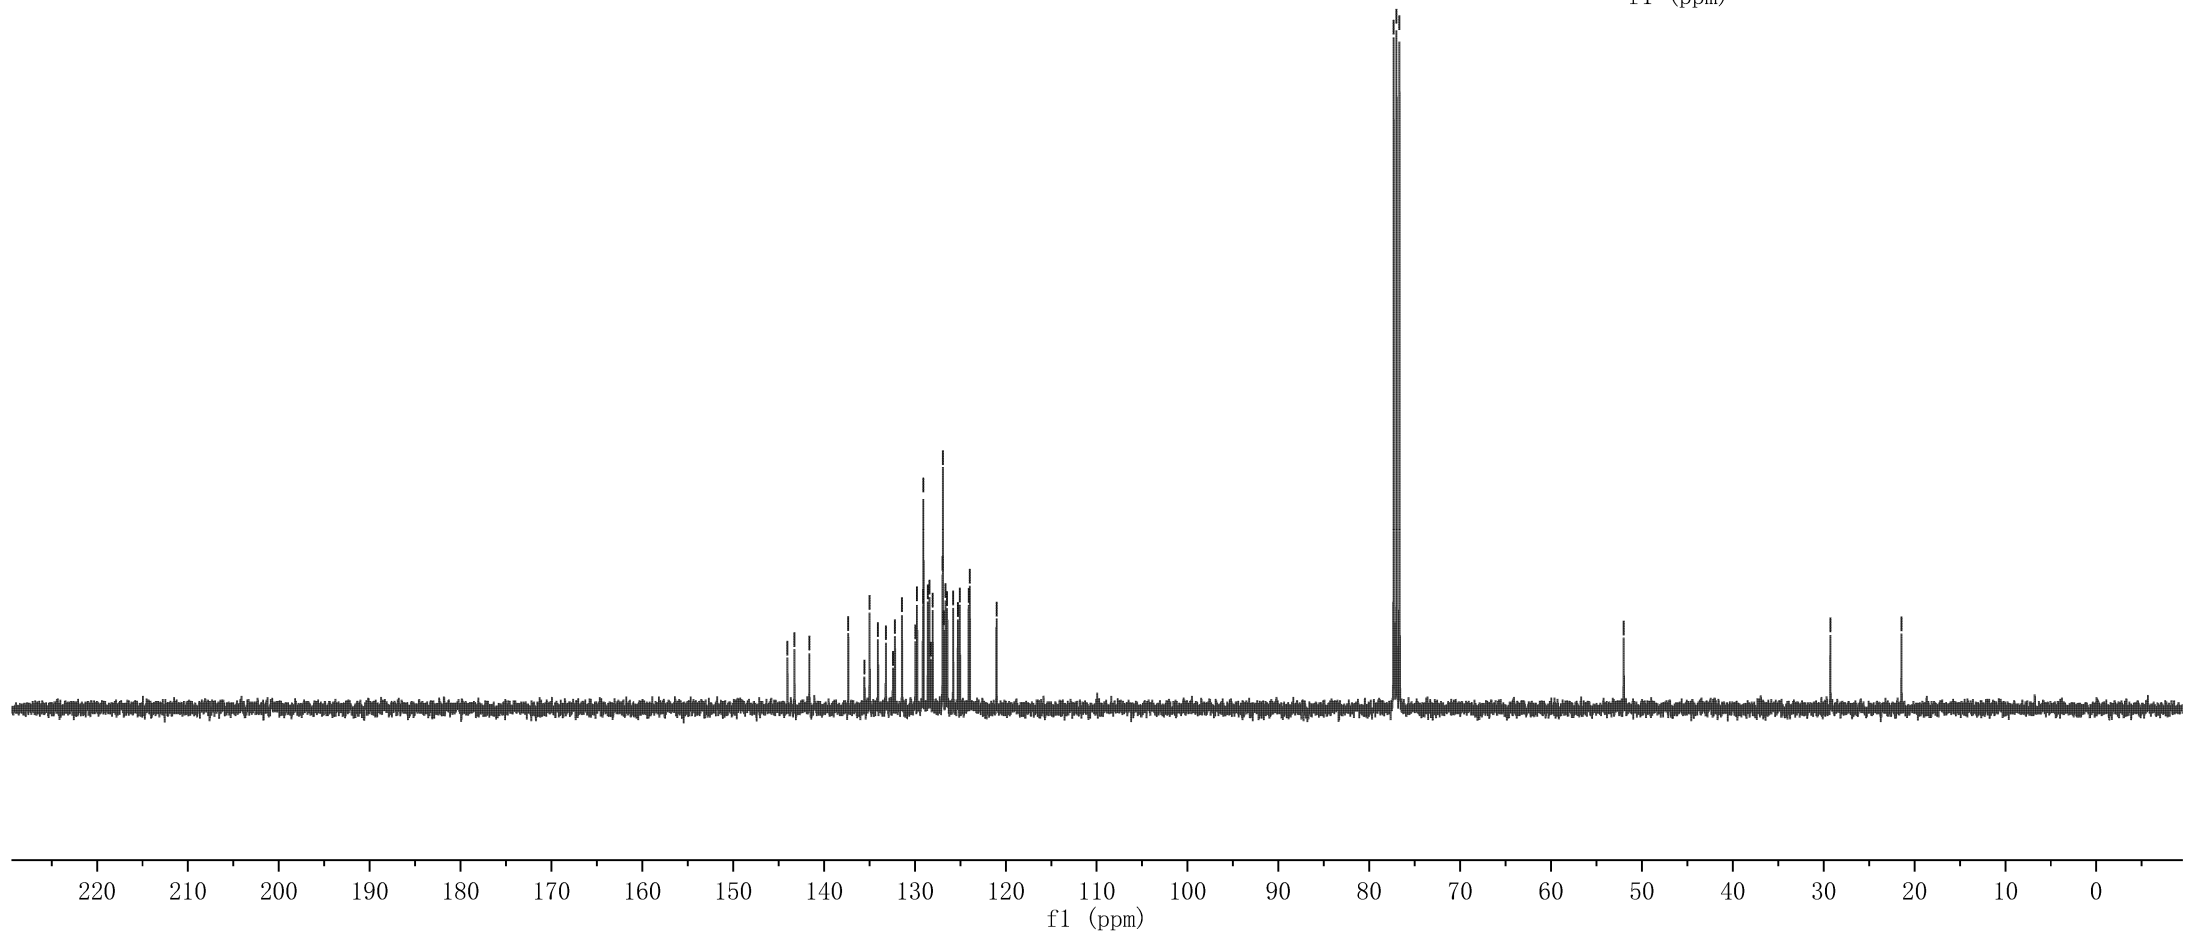

7.882  
7.861  
7.584  
7.561  
7.514  
7.507  
7.499  
7.338  
7.321  
7.291  
7.273  
7.193  
7.173  
7.072  
7.053

4.175  
4.146  
4.135  
4.126  
4.063  
4.042  
4.018  
3.989

2.662  
2.619  
2.553  
2.533  
2.492  
2.347

0.000

| Parameter                | Value               |
|--------------------------|---------------------|
| 1 Title                  | zzx-12-193          |
| 2 Origin                 | Bruker BioSpin GmbH |
| 3 Solvent                | CDC13               |
| 4 Temperature            | 298.0               |
| 5 Number of Scans        | 7                   |
| 6 Acquisition Time       | 4.0894              |
| 7 Acquisition Date       | 2021-03-15T16:19:21 |
| 8 Spectrometer Frequency | 400.13              |
| 9 Spectral Width         | 8012.8              |

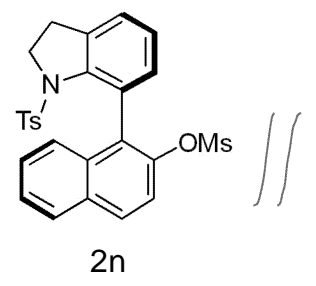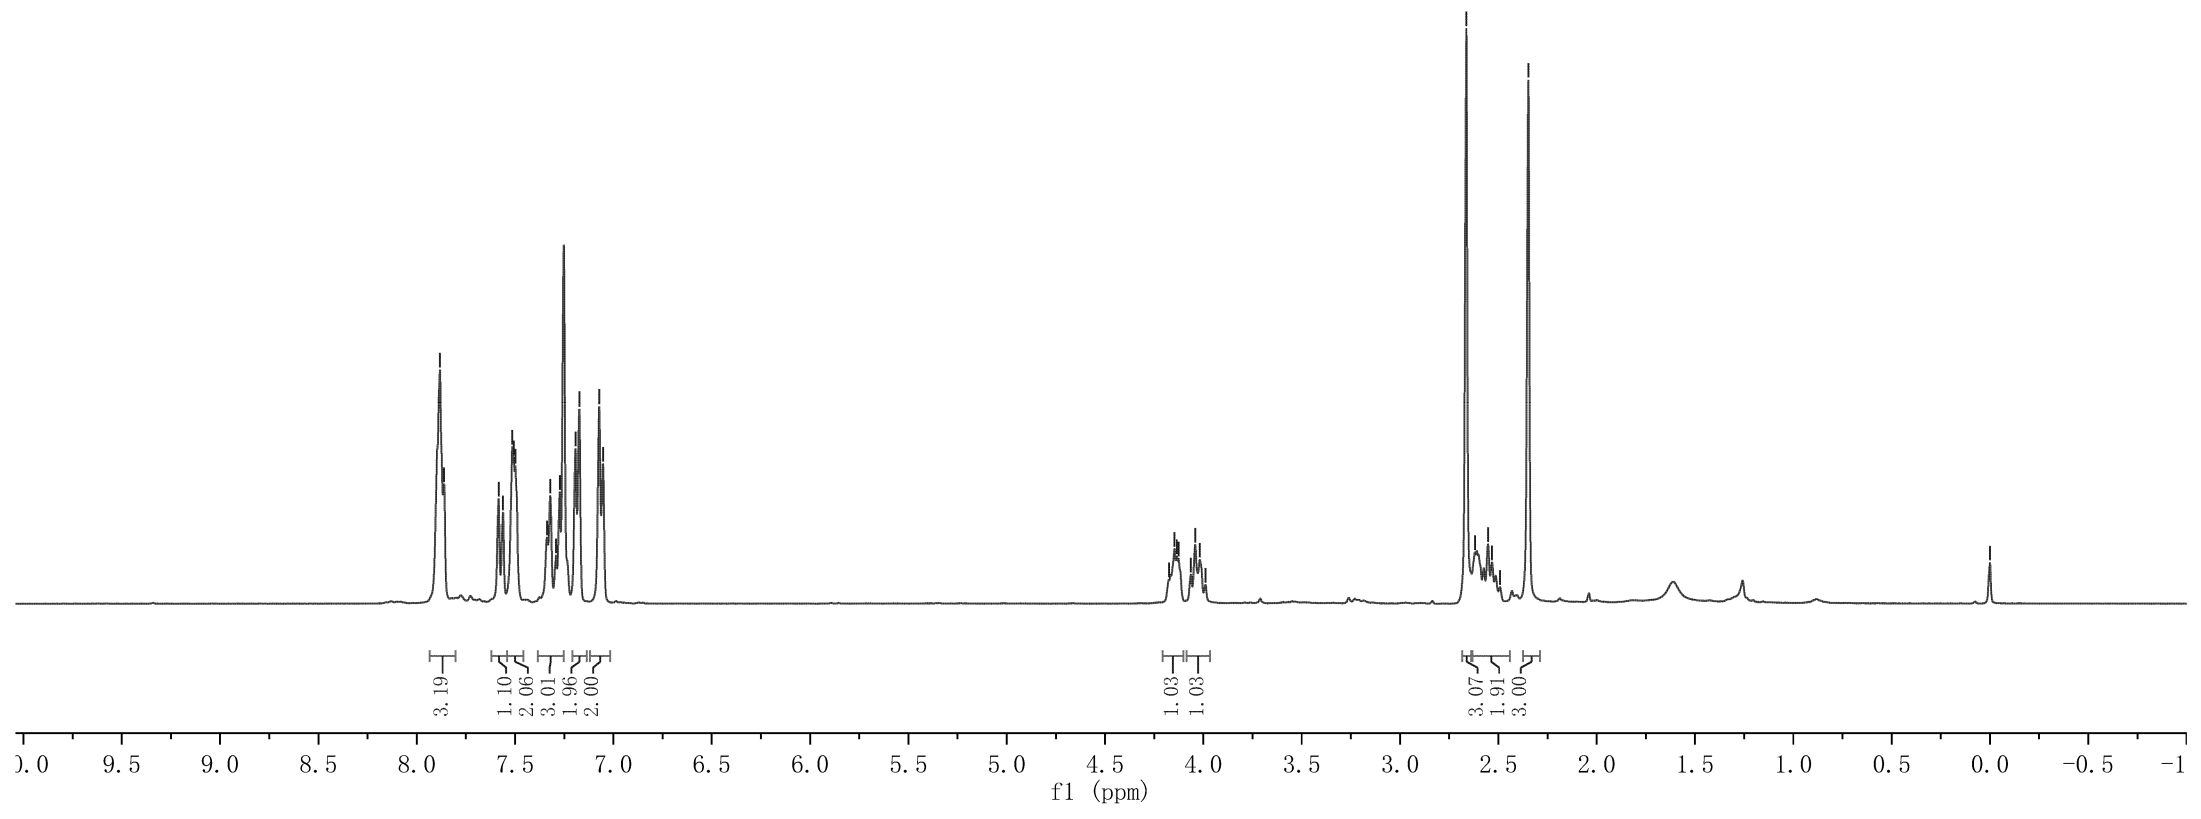

| Parameter                | Value               |
|--------------------------|---------------------|
| 1 Title                  | zzx-12-193-C        |
| 2 Origin                 | Bruker BioSpin GmbH |
| 3 Solvent                | CDC13               |
| 4 Temperature            | 300.0               |
| 5 Number of Scans        | 86                  |
| 6 Acquisition Time       | 1.3631              |
| 7 Acquisition Date       | 2021-03-15T16:21:26 |
| 8 Spectrometer Frequency | 100.61              |
| 9 Spectral Width         | 24038.5             |

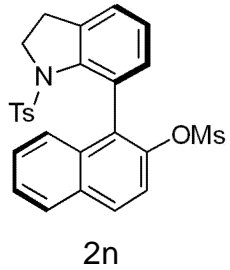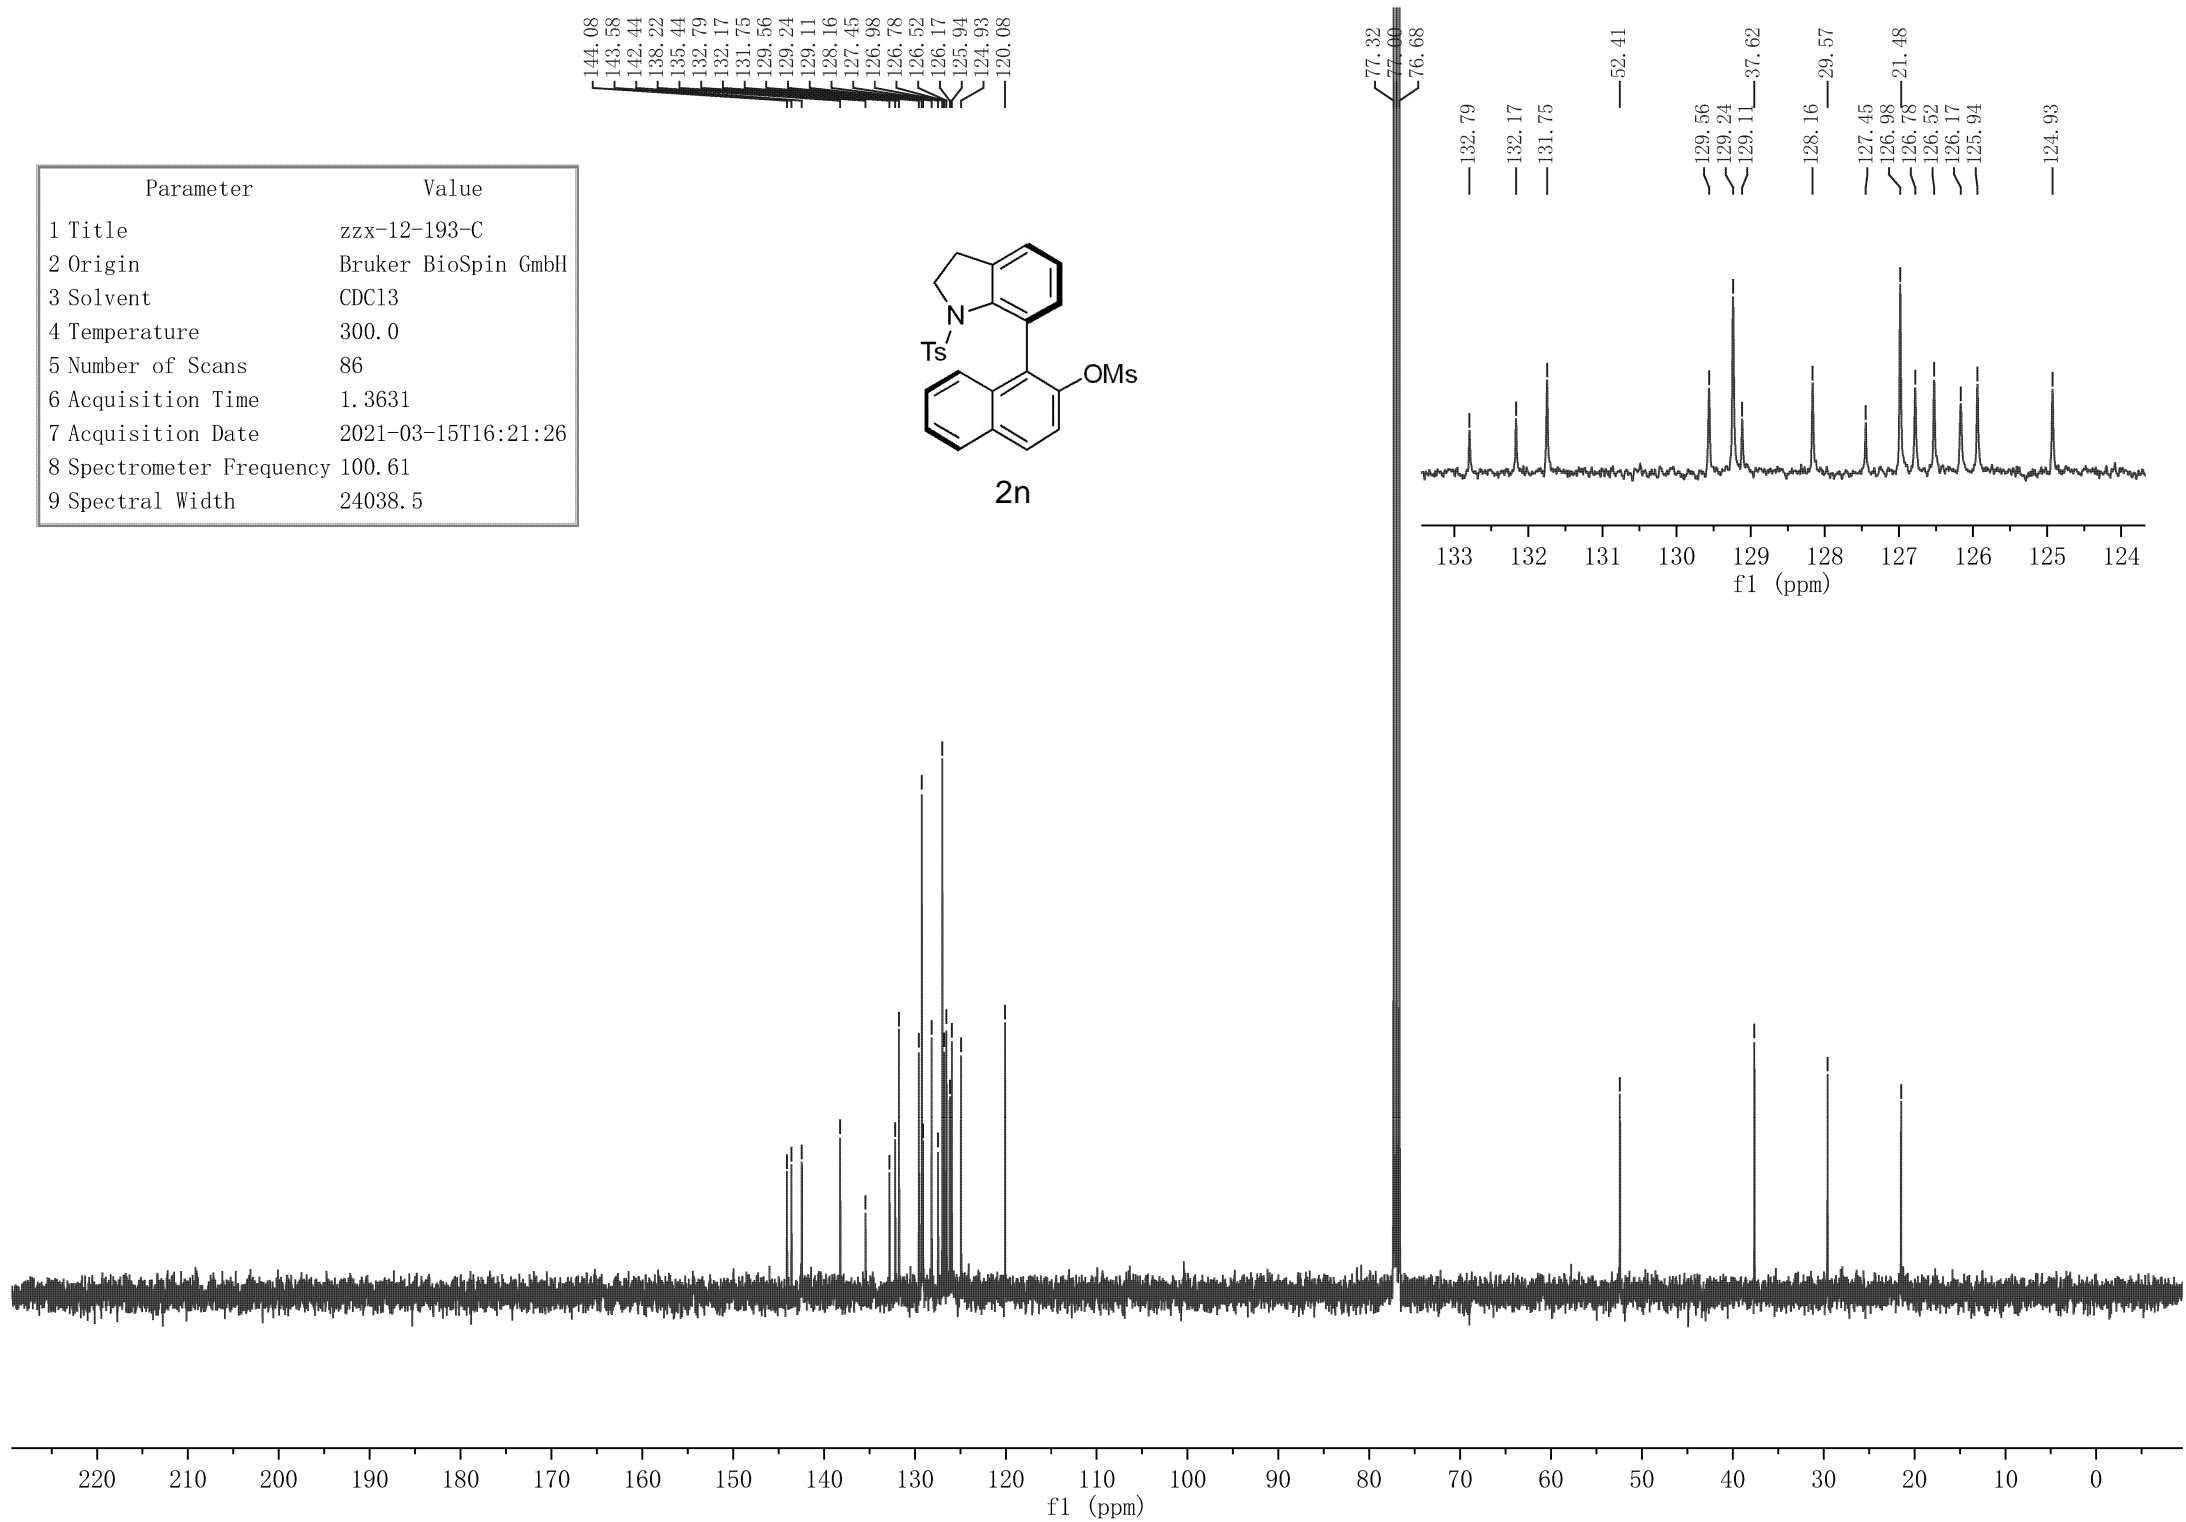

7.930  
7.906  
7.564  
7.556  
7.548  
7.420  
7.397  
7.331  
7.313  
7.279  
7.116  
7.097

4.164  
4.136  
4.126  
4.114  
4.048  
4.026  
4.001  
3.971

2.531  
2.512  
2.493  
2.474  
2.426  
2.405  
2.383  
2.361  
2.339

— 0.000

| Parameter                | Value               |
|--------------------------|---------------------|
| 1 Title                  | ZZX-12-131-H        |
| 2 Origin                 | Bruker BioSpin GmbH |
| 3 Solvent                | CDC13               |
| 4 Temperature            | 298.0               |
| 5 Number of Scans        | 6                   |
| 6 Acquisition Time       | 4.0894              |
| 7 Acquisition Date       | 2021-02-01T10:16:05 |
| 8 Spectrometer Frequency | 400.13              |
| 9 Spectral Width         | 8012.8              |

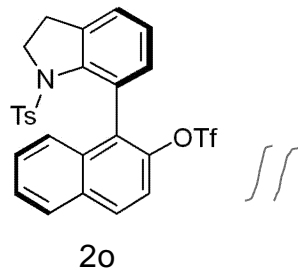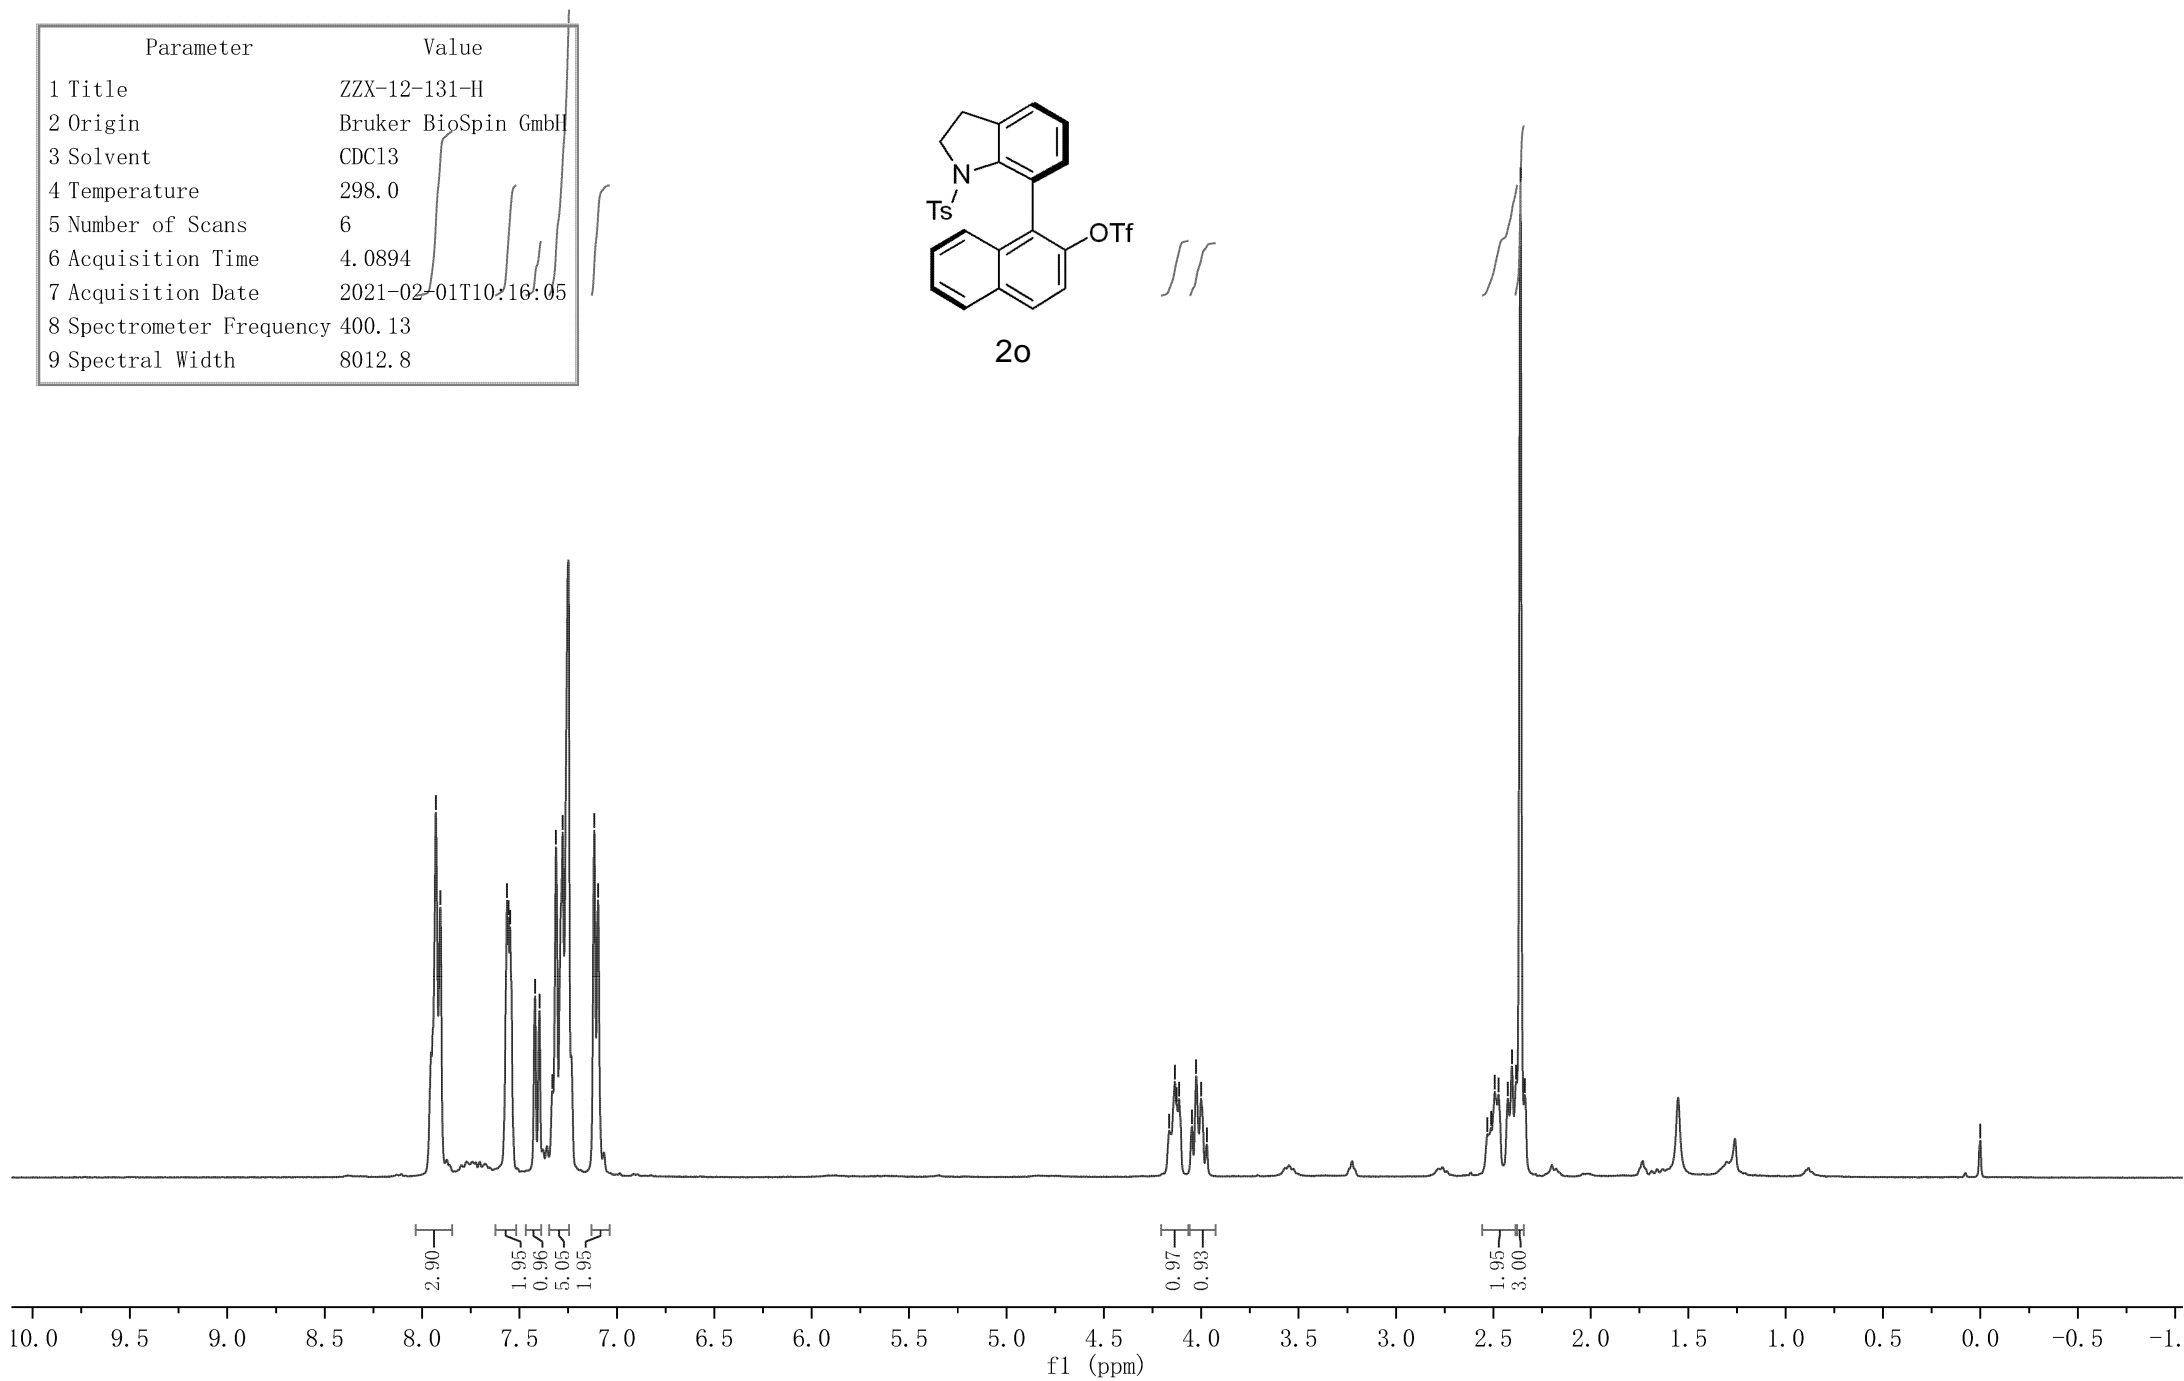

| Parameter                | Value               |
|--------------------------|---------------------|
| 1 Title                  | ZZX-12-131-C        |
| 2 Origin                 | Bruker BioSpin GmbH |
| 3 Solvent                | CDC13               |
| 4 Temperature            | 300.0               |
| 5 Number of Scans        | 91                  |
| 6 Acquisition Time       | 1.3631              |
| 7 Acquisition Date       | 2021-02-01T10:19:19 |
| 8 Spectrometer Frequency | 100.61              |
| 9 Spectral Width         | 24038.5             |

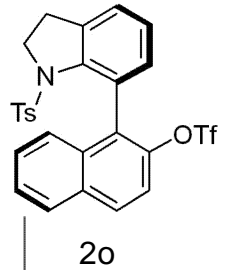

144.10  
143.73  
142.06  
138.41  
135.15  
133.11  
132.65  
132.04  
130.59  
129.96  
129.31  
128.28  
127.18  
126.73  
126.58  
126.39  
126.30  
125.36  
123.20  
119.99  
118.96  
116.80  
113.70

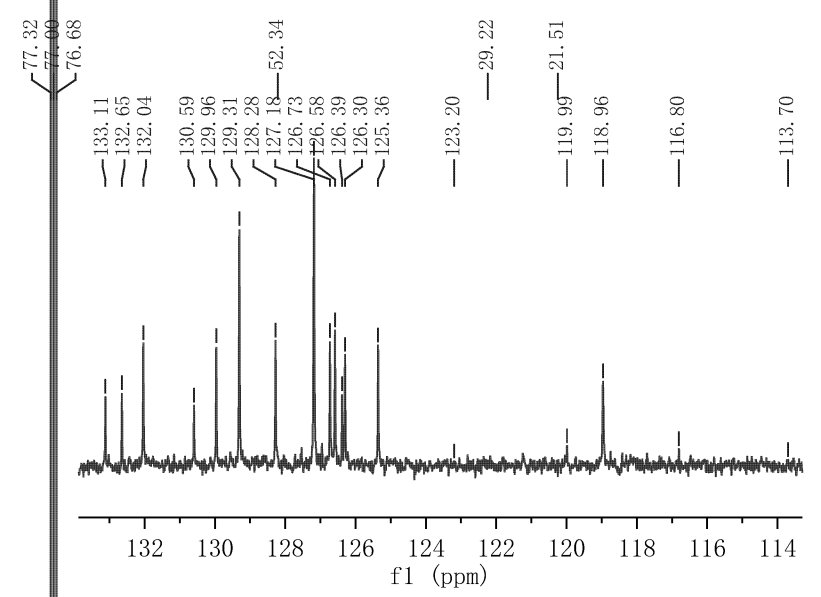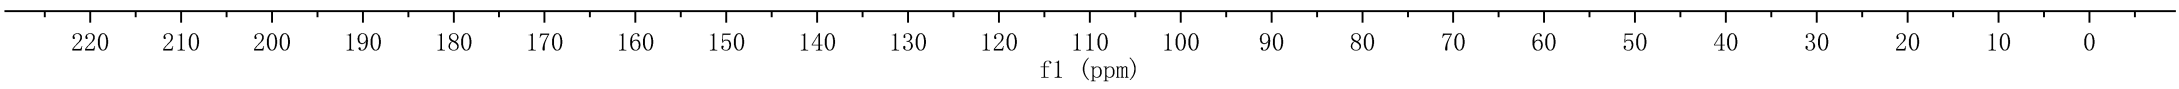

—74.46

| Parameter                | Value               |
|--------------------------|---------------------|
| 1 Title                  | zzx-13-211-F-1      |
| 2 Origin                 | Bruker BioSpin GmbH |
| 3 Solvent                | CDCl3               |
| 4 Temperature            | 294.9               |
| 5 Number of Scans        | 16                  |
| 6 Acquisition Time       | 0.7340              |
| 7 Acquisition Date       | 2021-11-27T10:11:10 |
| 8 Spectrometer Frequency | 376.31              |
| 9 Spectral Width         | 89285.7             |

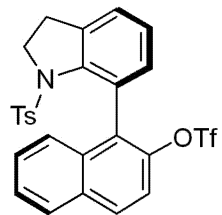

2o

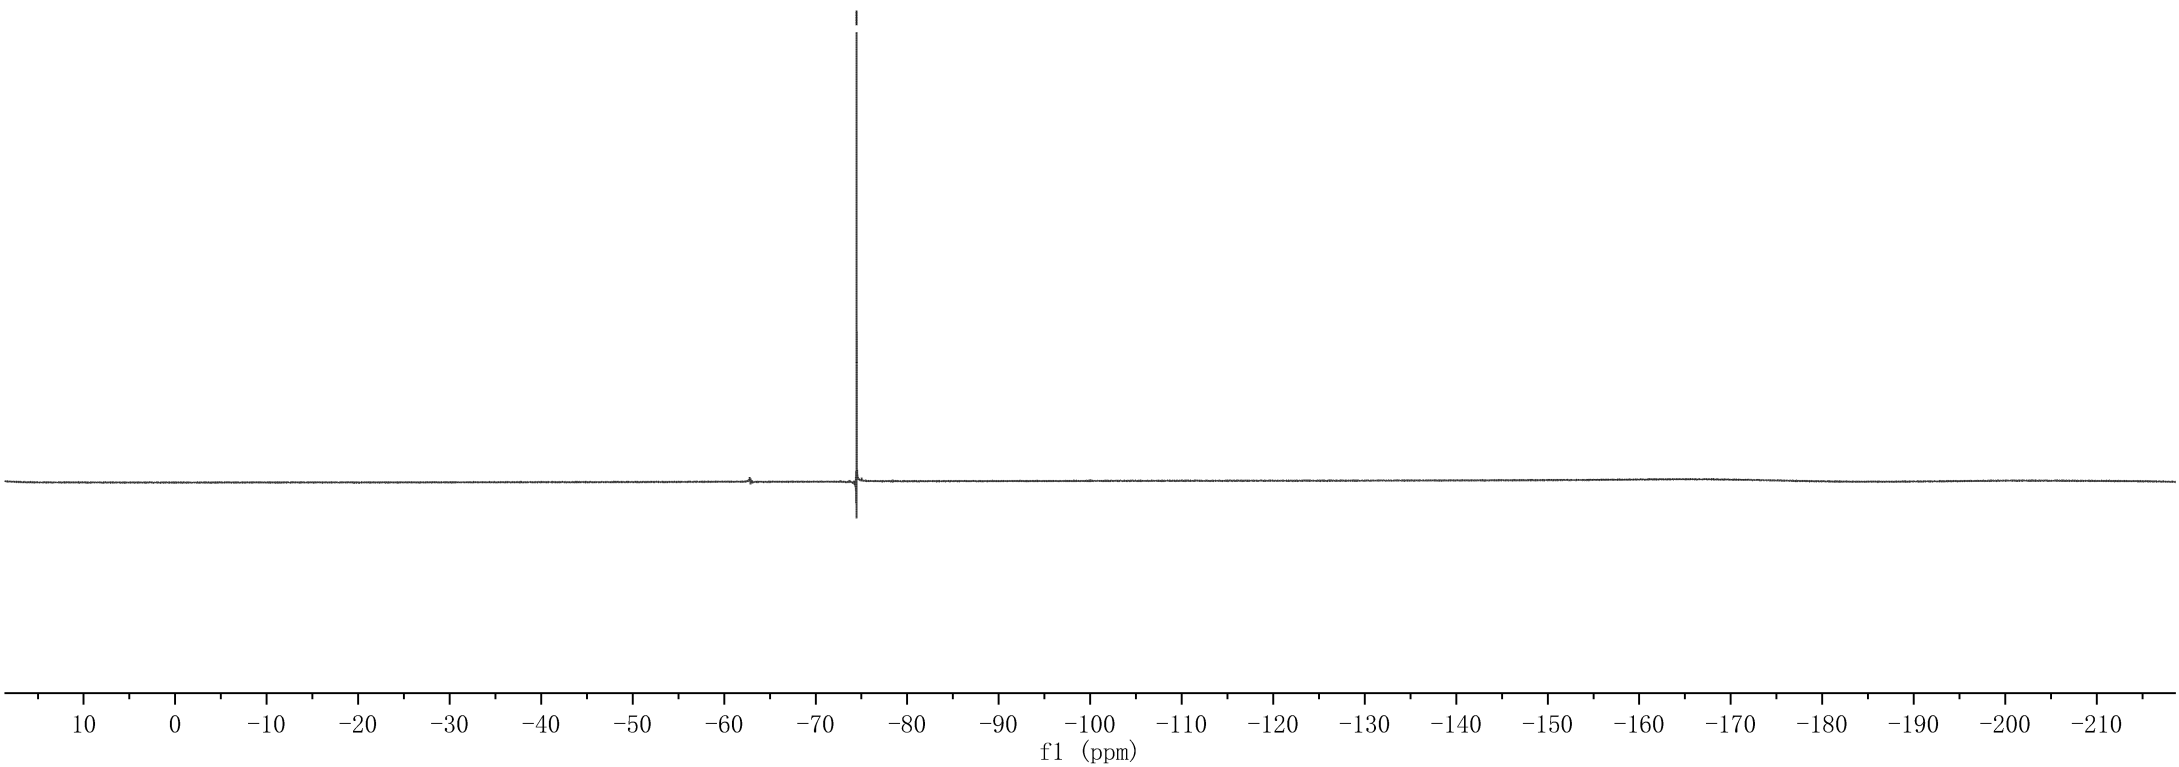

7.957  
7.945  
7.936  
7.874  
7.866  
7.853  
7.761  
7.507  
7.497  
7.274  
7.255  
7.242  
7.066  
7.047  
7.006  
6.994  
6.989

4.280  
4.252  
4.238  
4.226  
4.079  
4.056  
4.026  
4.002

2.548  
2.536  
2.527  
2.514  
2.291  
2.258  
2.173

— 0.000

| Parameter                | Value               |
|--------------------------|---------------------|
| 1 Title                  | zzx-11-224-H        |
| 2 Origin                 | Bruker BioSpin GmbH |
| 3 Solvent                | CDC13               |
| 4 Temperature            | 298.3               |
| 5 Number of Scans        | 12                  |
| 6 Acquisition Time       | 3.9846              |
| 7 Acquisition Date       | 2020-12-22T15:58:48 |
| 8 Spectrometer Frequency | 400.03              |
| 9 Spectral Width         | 8223.7              |

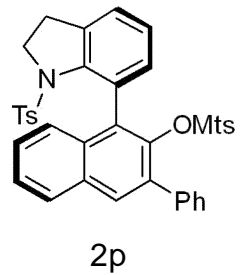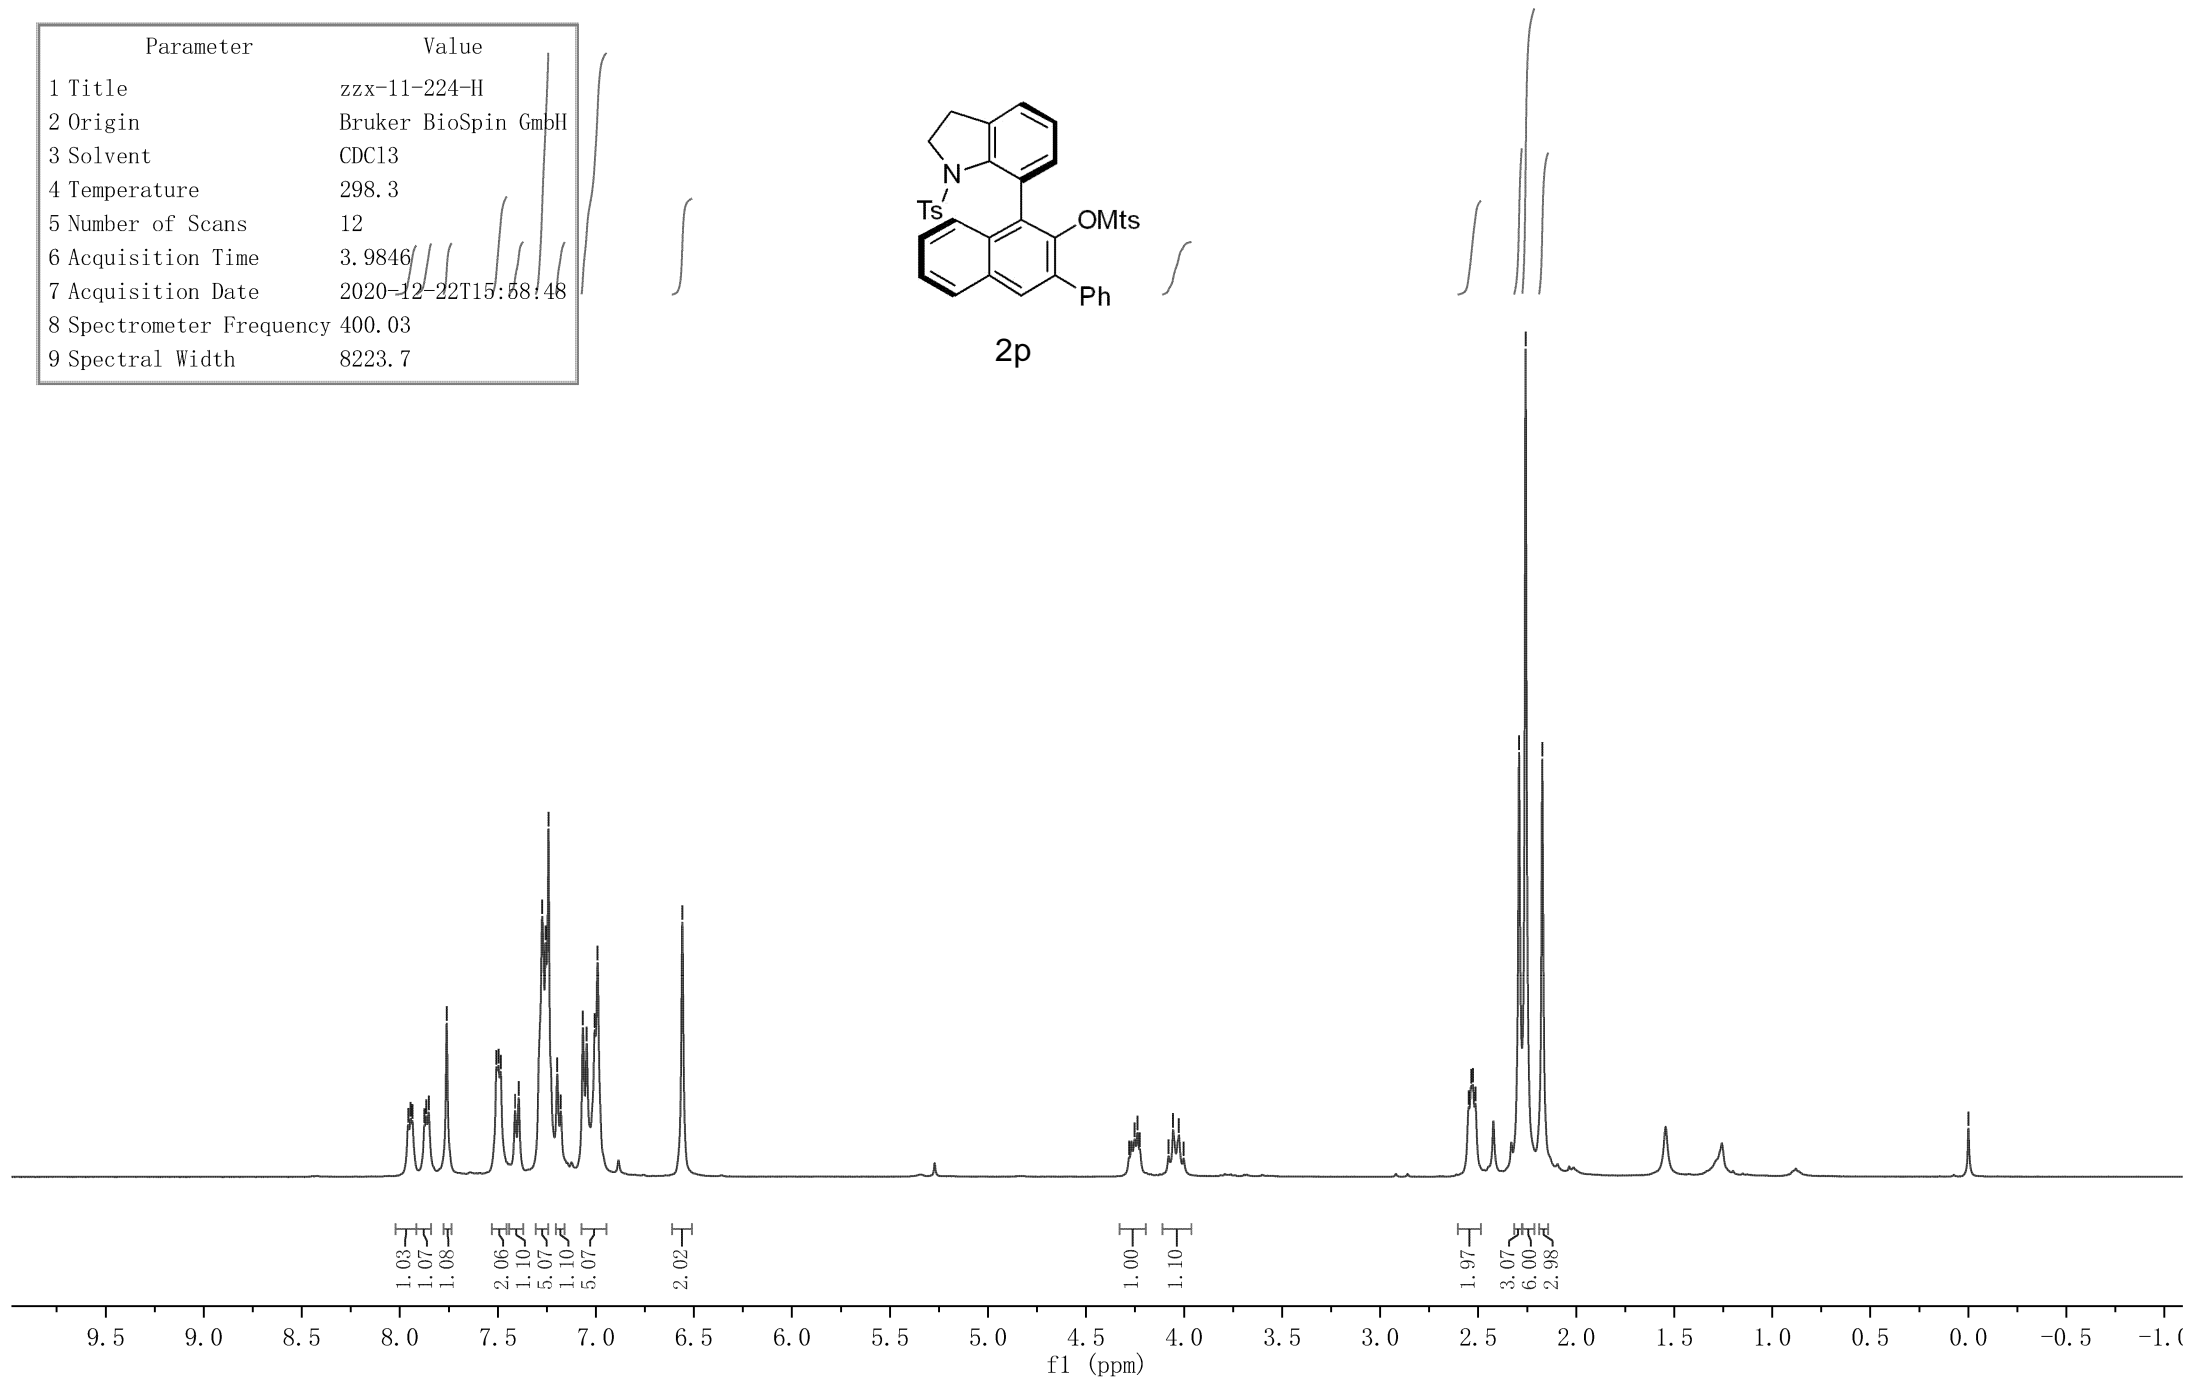

143.38  
142.93  
142.09  
141.98  
138.29  
137.82  
137.74  
135.91  
134.61  
133.78  
132.95  
132.79  
132.34  
131.20  
130.19  
129.23  
129.07  
128.35  
128.07  
127.45  
127.06  
126.81  
126.75  
126.38  
126.12  
125.75  
124.68

| Parameter                | Value               |
|--------------------------|---------------------|
| 1 Title                  | zzx-11-224-C-1      |
| 2 Origin                 | Bruker BioSpin GmbH |
| 3 Solvent                | CDC13               |
| 4 Temperature            | 299.2               |
| 5 Number of Scans        | 73                  |
| 6 Acquisition Time       | 1.3631              |
| 7 Acquisition Date       | 2020-12-22T16:02:54 |
| 8 Spectrometer Frequency | 100.59              |
| 9 Spectral Width         | 24038.5             |

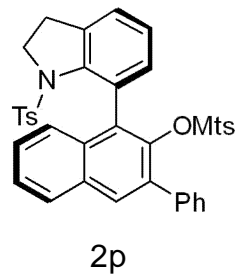

77.32  
77.00  
76.68  
138.29  
137.82  
137.74  
135.91  
52.50  
134.61  
133.78  
132.95  
132.79  
132.34  
131.20  
29.59  
130.19  
22.56  
21.44  
20.75  
128.35  
128.07  
127.45  
127.06  
126.81  
126.75  
126.38  
126.12  
125.75  
124.68

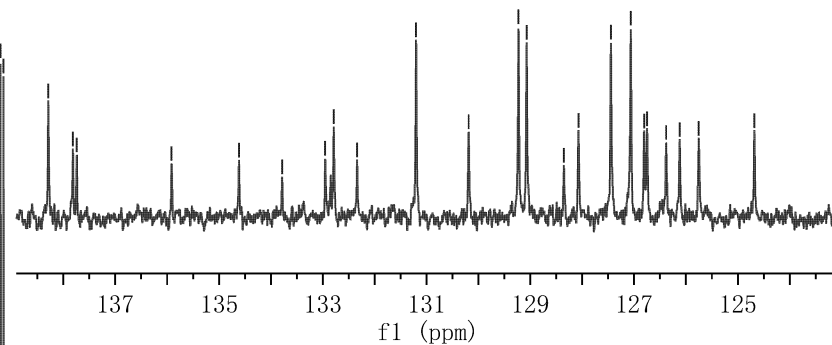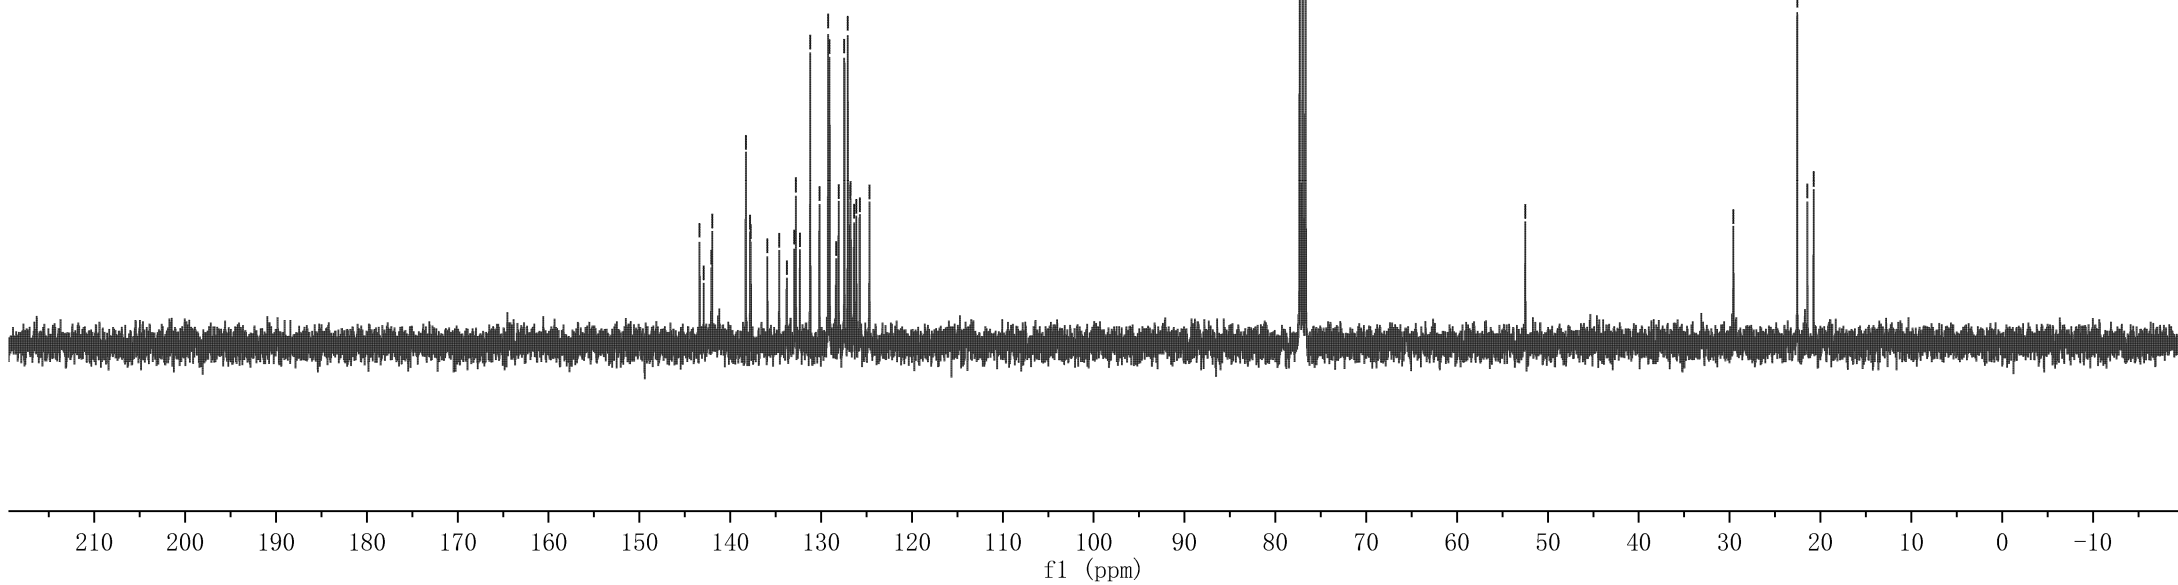



| Parameter                | Value               |
|--------------------------|---------------------|
| 1 Title                  | ZZX-11-88-H         |
| 2 Origin                 | Bruker BioSpin GmbH |
| 3 Solvent                | CDC13               |
| 4 Temperature            | 298.0               |
| 5 Number of Scans        | 9                   |
| 6 Acquisition Time       | 4.0894              |
| 7 Acquisition Date       | 2020-11-07T14:28:48 |
| 8 Spectrometer Frequency | 400.13              |
| 9 Spectral Width         | 8012.8              |

7.725  
7.705  
7.689  
7.668  
7.437  
7.418  
7.352  
7.303  
7.282  
7.217  
7.198  
7.179  
7.111  
7.092  
7.079  
7.058  
6.887

4.141  
4.122  
4.103  
4.071  
4.018  
3.998  
3.966  
3.945  
3.519

2.536  
2.476  
2.416  
2.394  
2.373  
2.337  
2.296

0.000

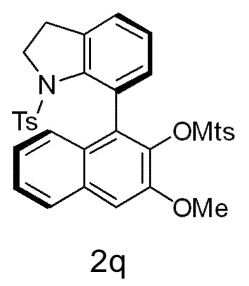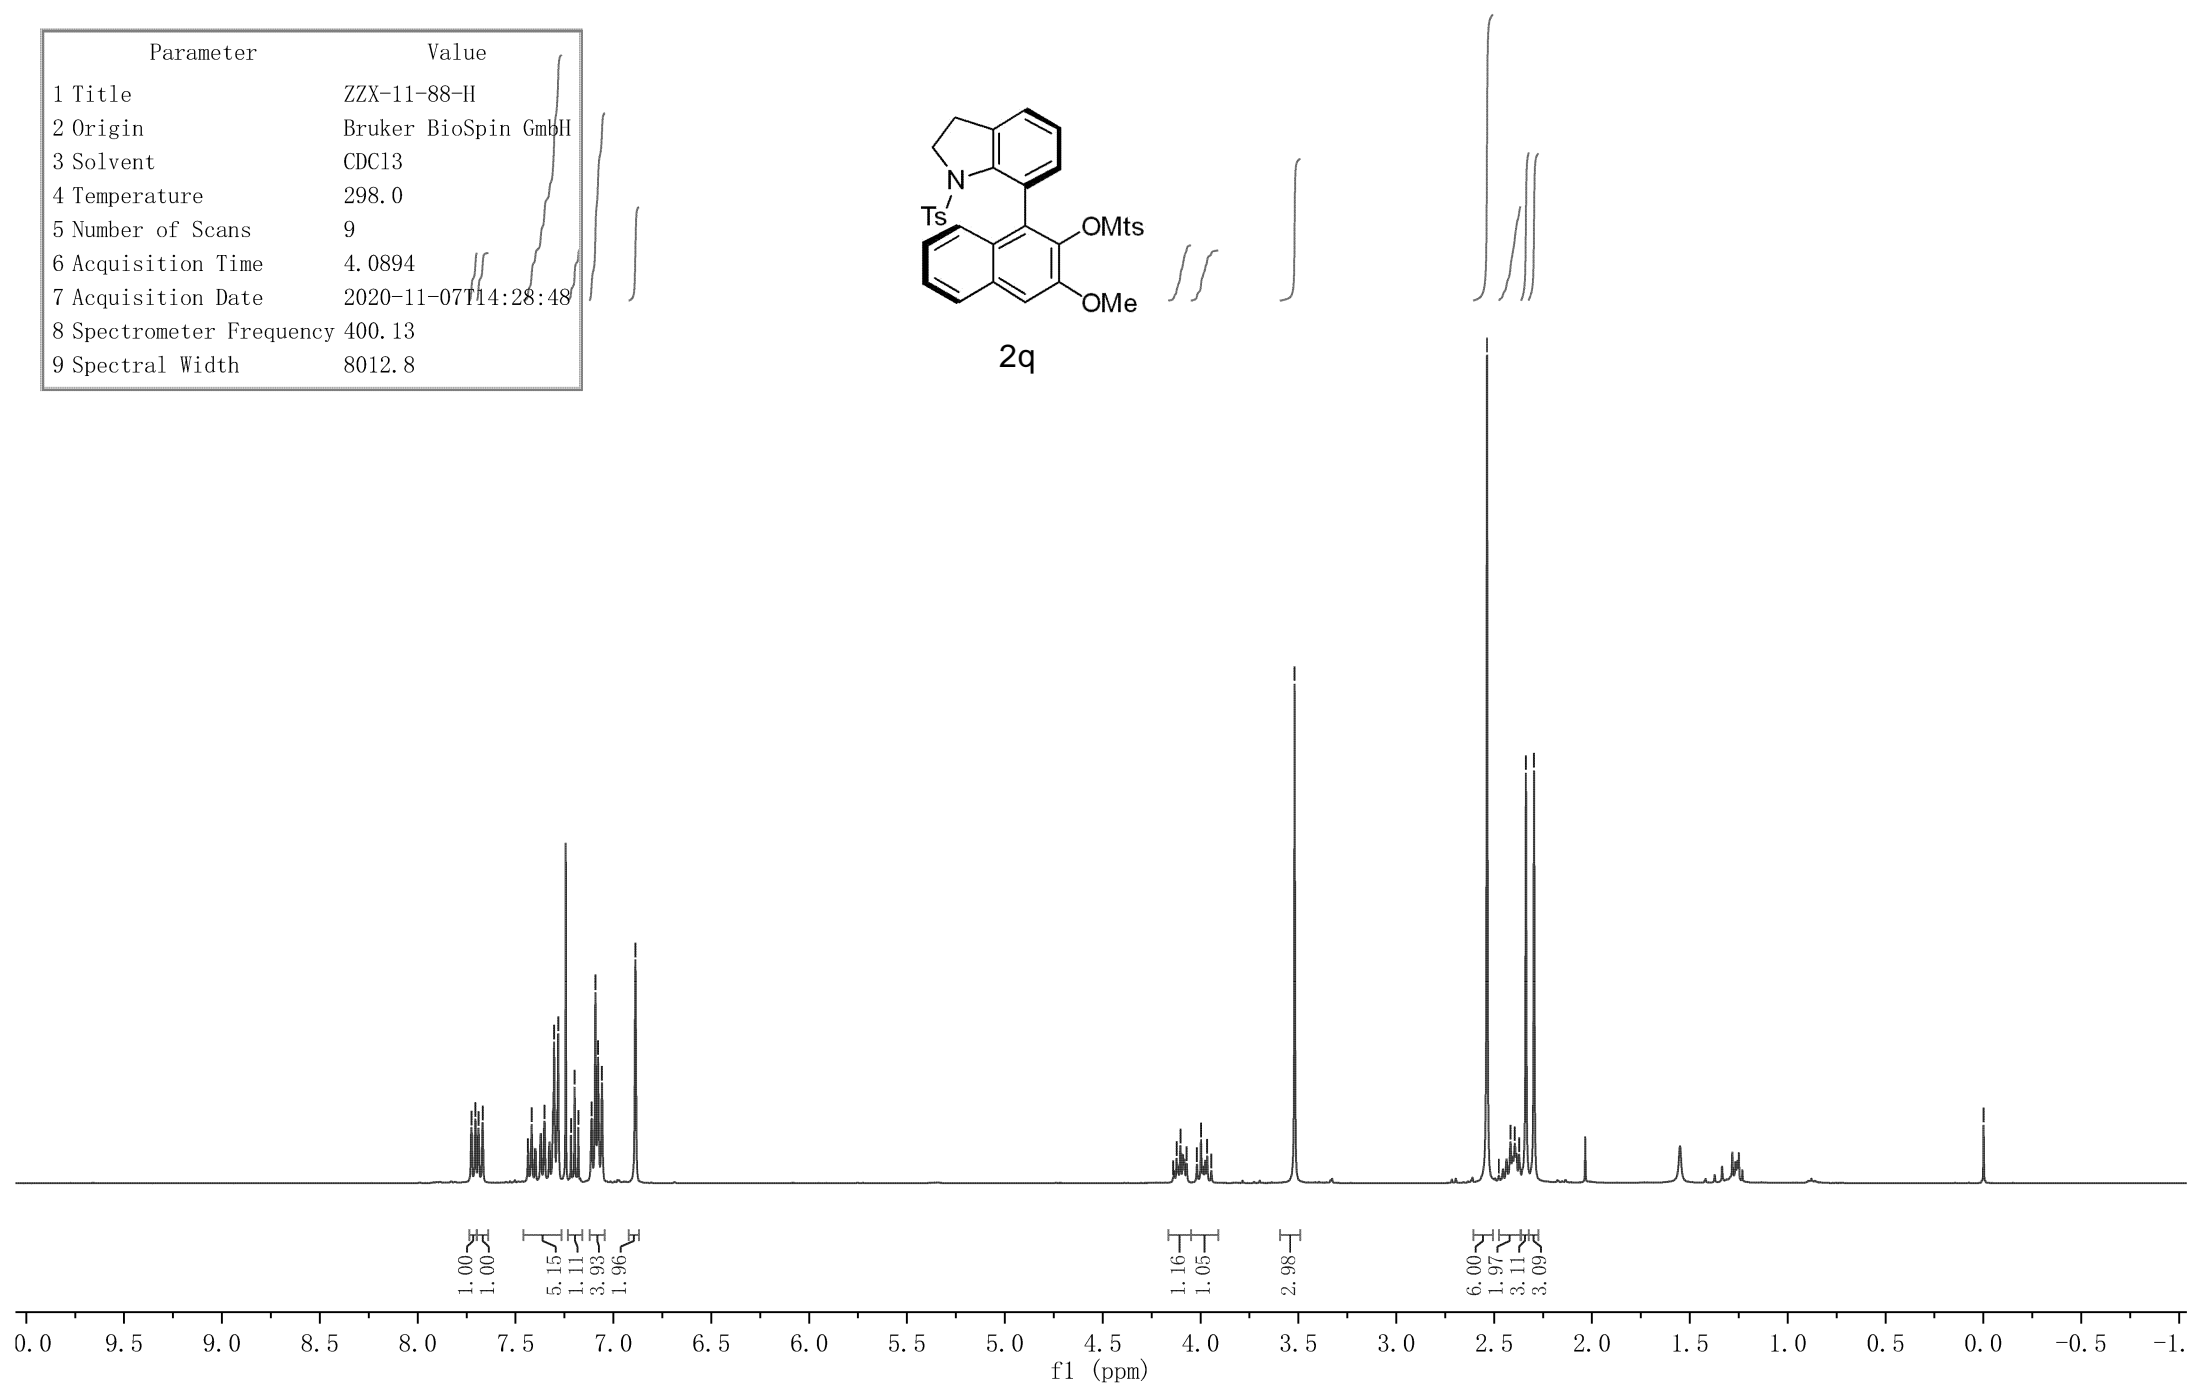

| Parameter                | Value               |
|--------------------------|---------------------|
| 1 Title                  | ZZX-11-88-C         |
| 2 Origin                 | Bruker BioSpin GmbH |
| 3 Solvent                | CDC13               |
| 4 Temperature            | 300.0               |
| 5 Number of Scans        | 35                  |
| 6 Acquisition Time       | 1.3631              |
| 7 Acquisition Date       | 2020-11-07T14:30:33 |
| 8 Spectrometer Frequency | 100.61              |
| 9 Spectral Width         | 24038.5             |

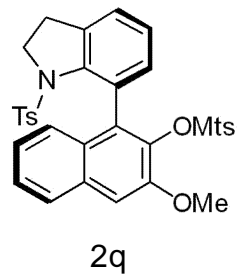

150.30  
141.97  
141.72  
138.65  
137.54  
132.75  
132.10  
131.01  
129.13  
127.94  
127.57  
127.14  
126.77  
126.52  
126.17  
125.96  
124.68  
124.07  
124.84

141.97  
141.72  
138.65  
77.32  
77.00  
76.68  
137.54  
137.33  
135.57  
134.93  
55.05  
52.28  
132.75  
132.10  
131.01  
129.13  
29.27  
22.60  
21.48  
21.14  
20.93  
127.94  
127.57  
127.14  
126.77  
126.52  
126.17  
125.96  
124.68  
124.07

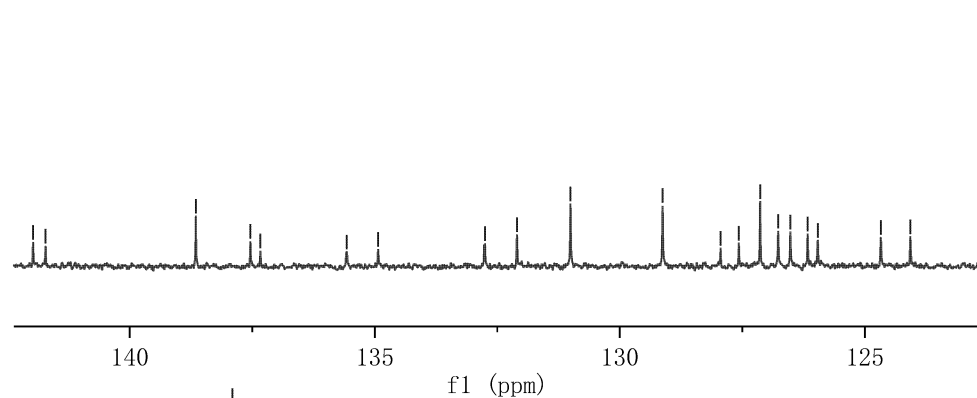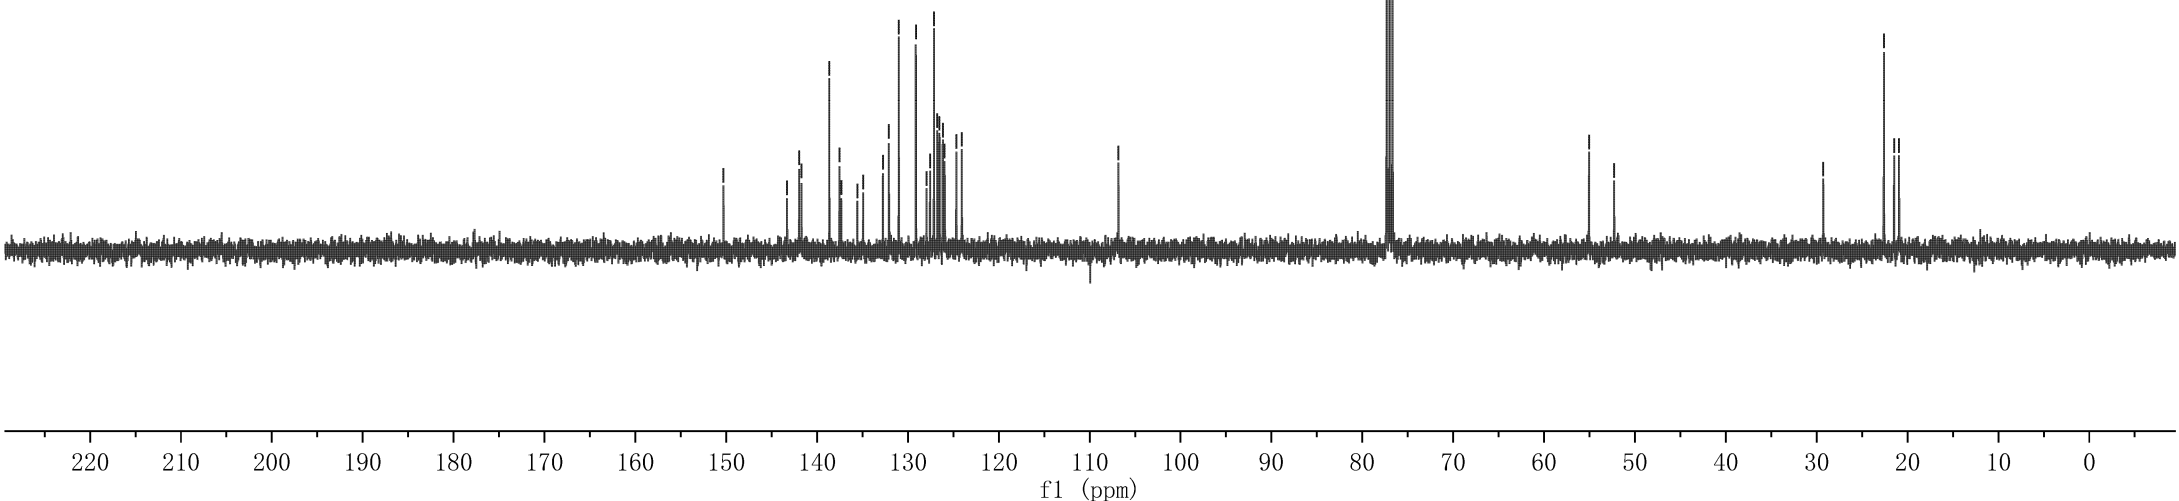

| Parameter                | Value               |
|--------------------------|---------------------|
| 1 Title                  | ZZX-11-86-H         |
| 2 Origin                 | Bruker BioSpin GmbH |
| 3 Solvent                | CDC13               |
| 4 Temperature            | 298.0               |
| 5 Number of Scans        | 5                   |
| 6 Acquisition Time       | 4.0894              |
| 7 Acquisition Date       | 2020-11-07T13:43:52 |
| 8 Spectrometer Frequency | 400.13              |
| 9 Spectral Width         | 8012.8              |

7.998  
7.993  
7.674  
7.652  
7.646  
7.623  
7.217  
7.204  
7.195  
7.159  
7.150  
7.144  
7.137  
7.127  
7.048  
7.028  
6.888

4.053  
4.021  
4.009  
3.989  
3.803  
3.782  
3.750  
3.729

2.487  
2.466  
2.448  
2.427  
2.411  
2.339  
2.304

— 0.000

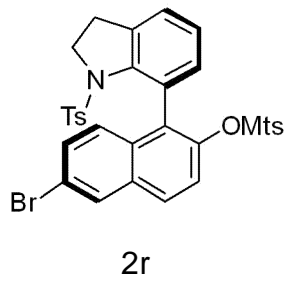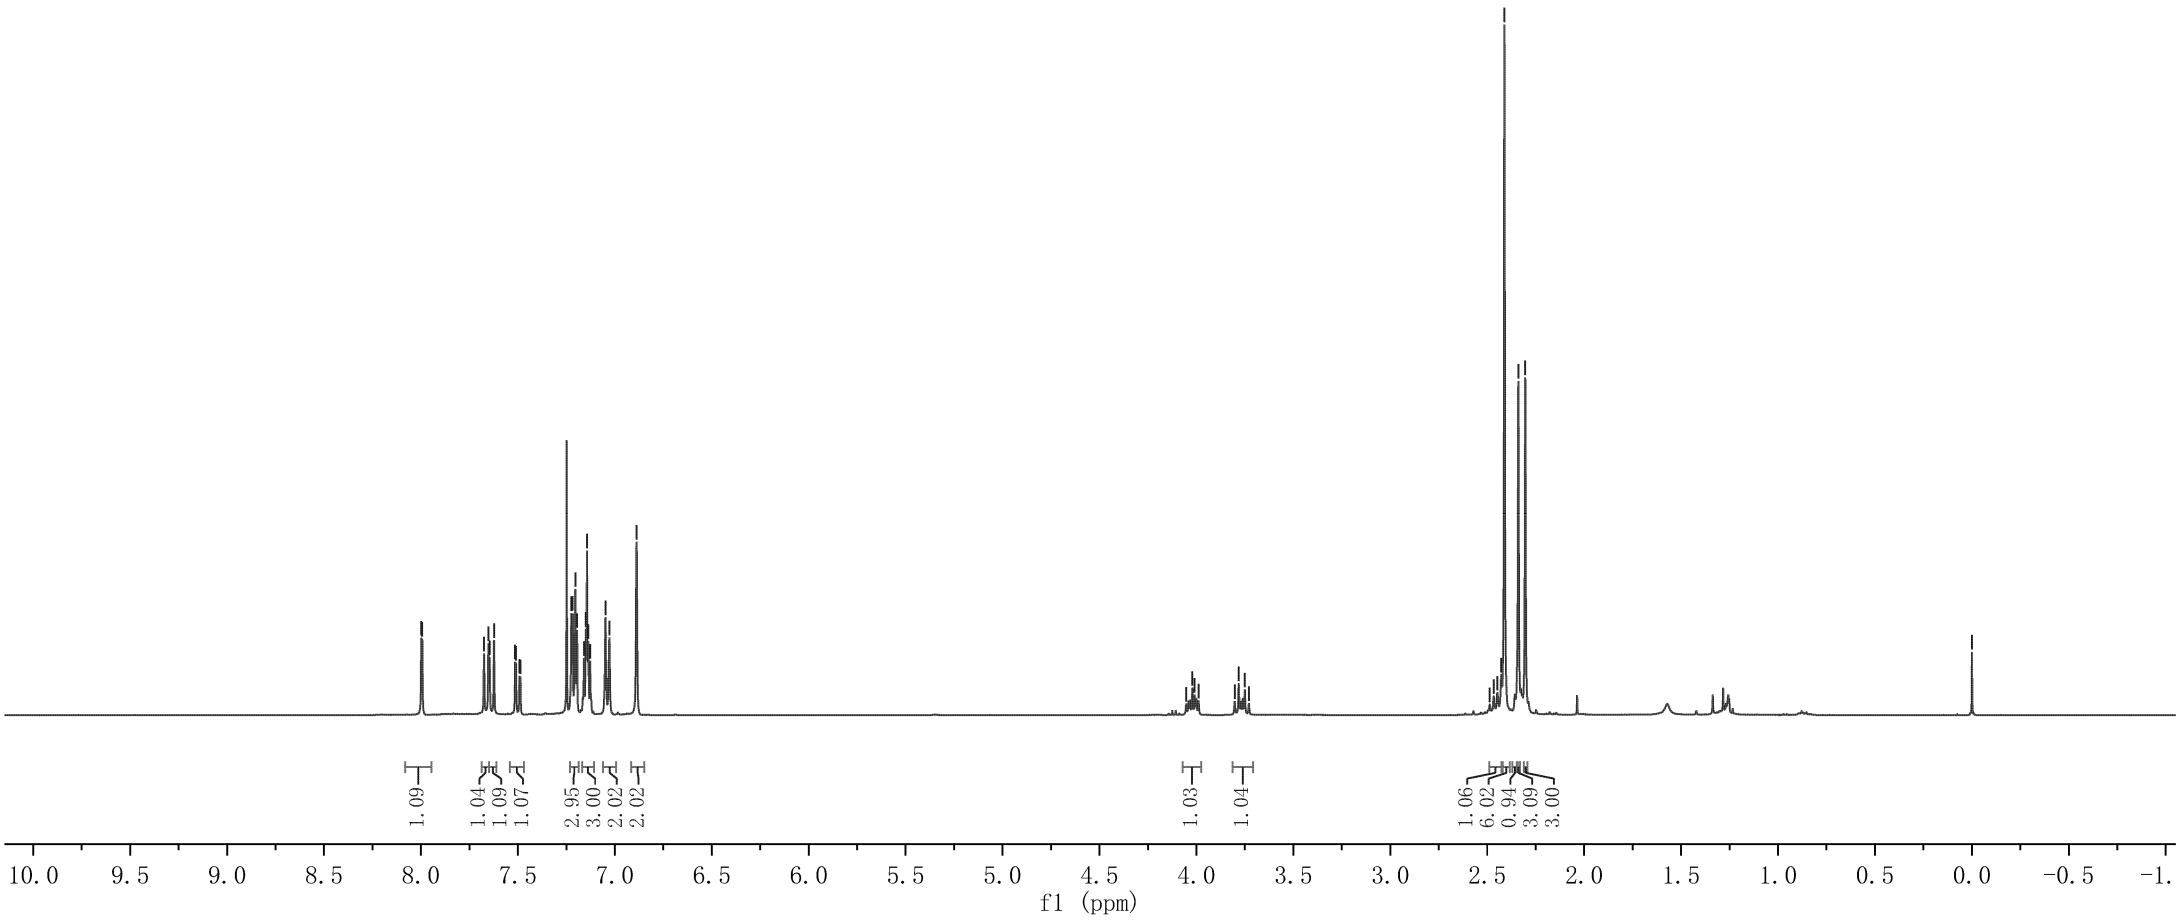

| Parameter                | Value               |
|--------------------------|---------------------|
| 1 Title                  | ZZX-11-86-C         |
| 2 Origin                 | Bruker BioSpin GmbH |
| 3 Solvent                | CDC13               |
| 4 Temperature            | 300.0               |
| 5 Number of Scans        | 25                  |
| 6 Acquisition Time       | 1.3631              |
| 7 Acquisition Date       | 2020-11-07T13:45:24 |
| 8 Spectrometer Frequency | 100.61              |
| 9 Spectral Width         | 24038.5             |

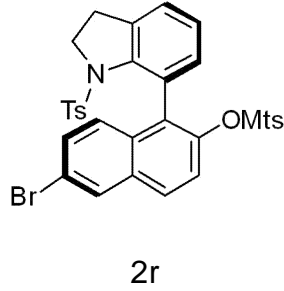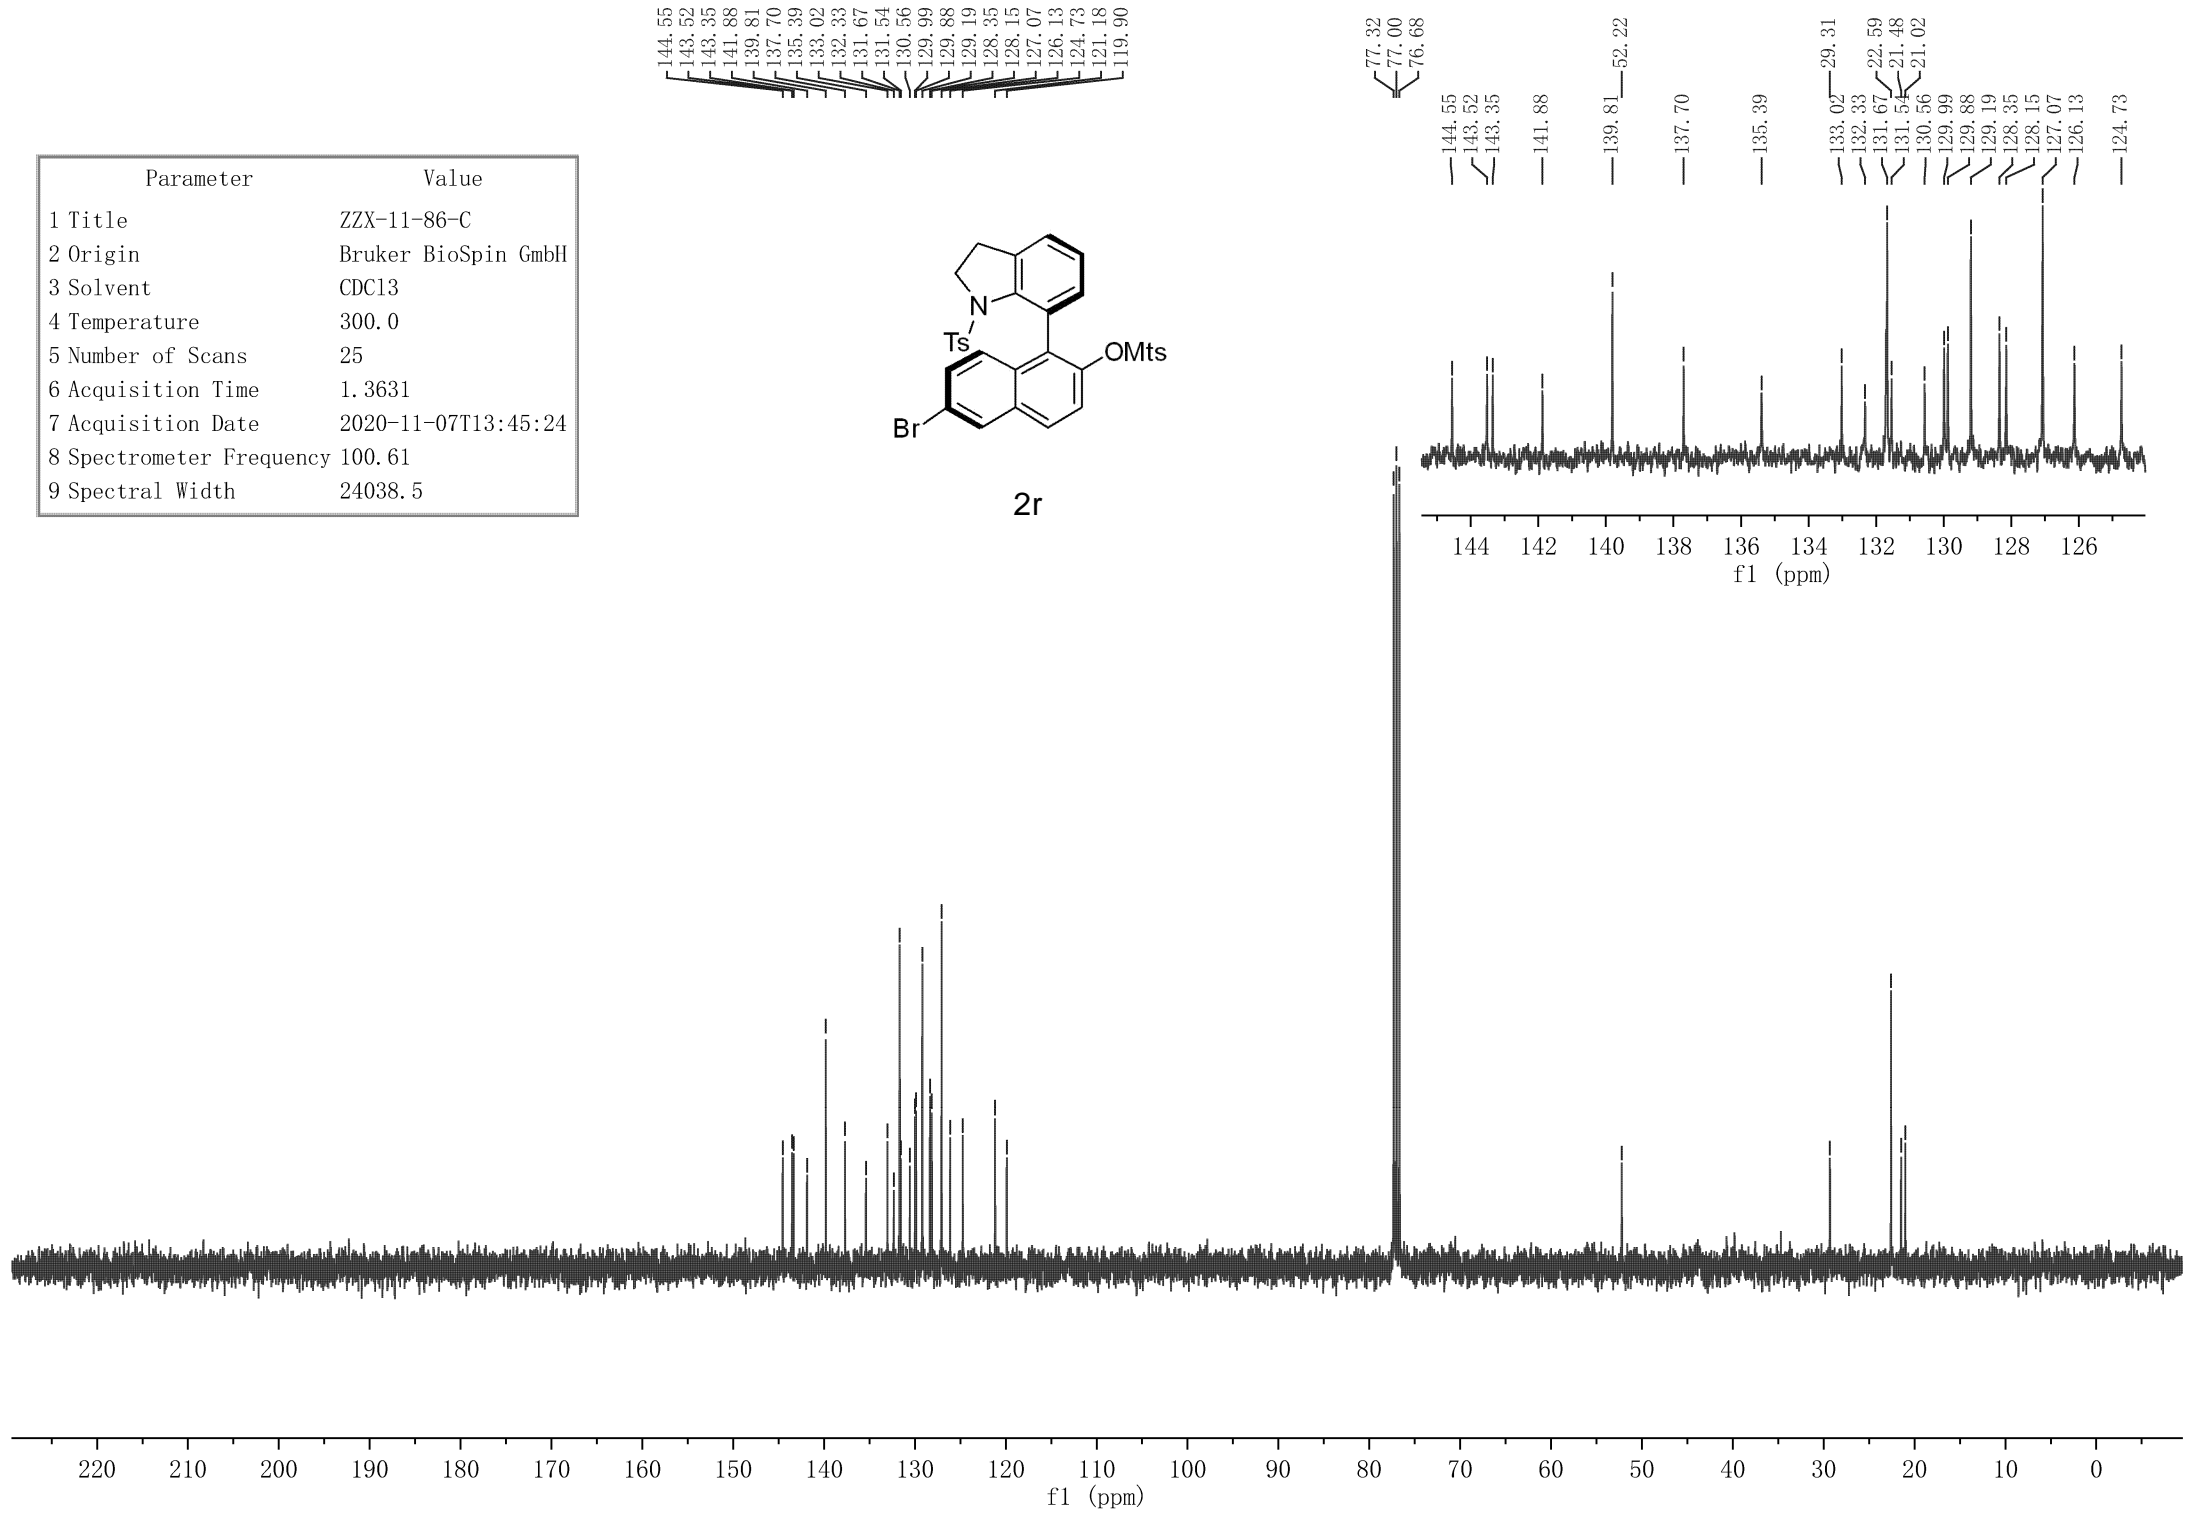

8.033  
8.029  
7.849  
7.825  
7.802  
7.722  
7.704  
7.700  
7.686  
7.480  
7.462  
7.442  
7.378  
7.375  
7.357  
7.339  
7.336  
7.267  
7.246  
7.218  
7.196  
7.160  
7.142  
7.119  
7.046  
7.026  
6.890

4.088  
4.056  
4.044  
4.024  
3.834  
3.813  
3.781  
3.761

2.506  
2.486  
2.466  
2.446  
2.431  
2.374  
2.362  
2.354  
2.341  
2.330  
2.303

0.000

| Parameter                | Value               |
|--------------------------|---------------------|
| 1 Title                  | zzx-11-166-H        |
| 2 Origin                 | Bruker BioSpin GmbH |
| 3 Solvent                | CDC13               |
| 4 Temperature            | 298.0               |
| 5 Number of Scans        | 12                  |
| 6 Acquisition Time       | 4.0894              |
| 7 Acquisition Date       | 2020-11-29T14:33:36 |
| 8 Spectrometer Frequency | 400.13              |
| 9 Spectral Width         | 8012.8              |

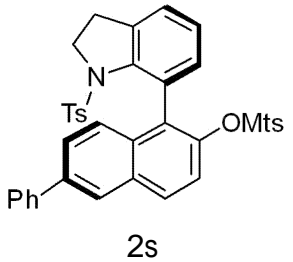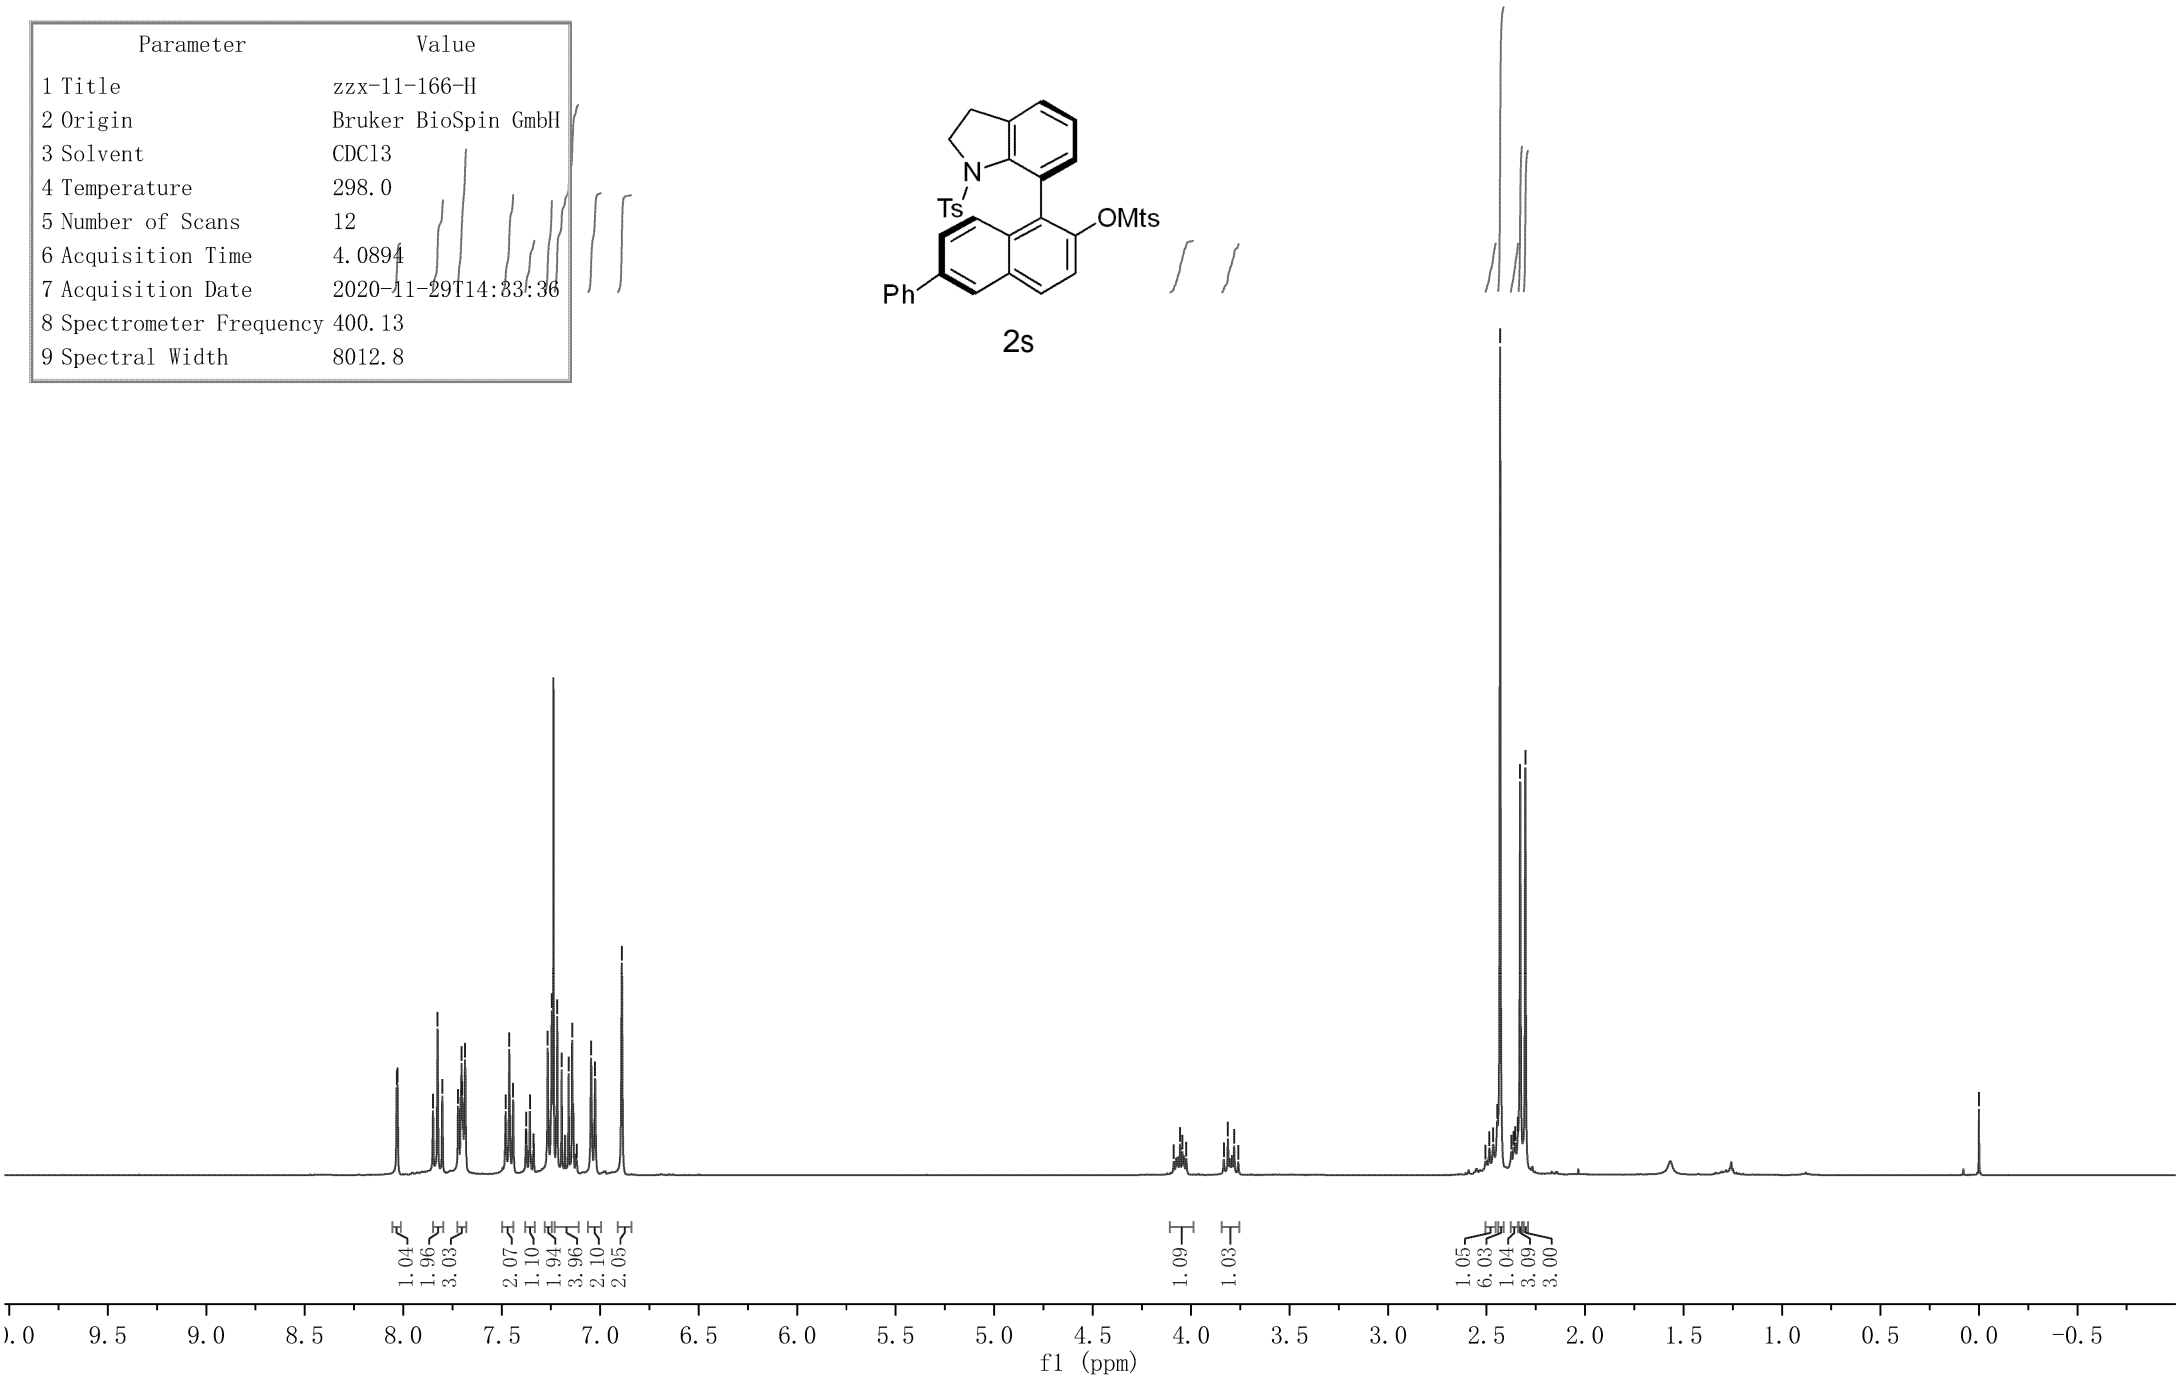

| Parameter                | Value               |
|--------------------------|---------------------|
| 1 Title                  | zzx-11-166-C-1      |
| 2 Origin                 | Bruker BioSpin GmbH |
| 3 Solvent                | CDC13               |
| 4 Temperature            | 300.0               |
| 5 Number of Scans        | 64                  |
| 6 Acquisition Time       | 1.3631              |
| 7 Acquisition Date       | 2020-11-29T14:37:15 |
| 8 Spectrometer Frequency | 100.61              |
| 9 Spectral Width         | 24038.5             |

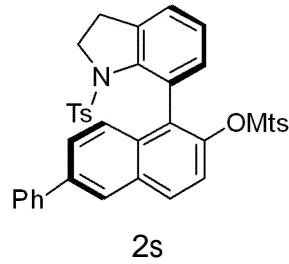

144.39  
143.41  
143.22  
141.88  
140.75  
139.81  
138.34  
137.62  
135.48  
132.46  
132.23  
132.10  
131.87  
131.64  
130.14  
129.37  
129.15  
128.79  
127.61  
127.36  
127.13  
127.03  
126.27  
126.06  
125.92  
124.54  
120.38

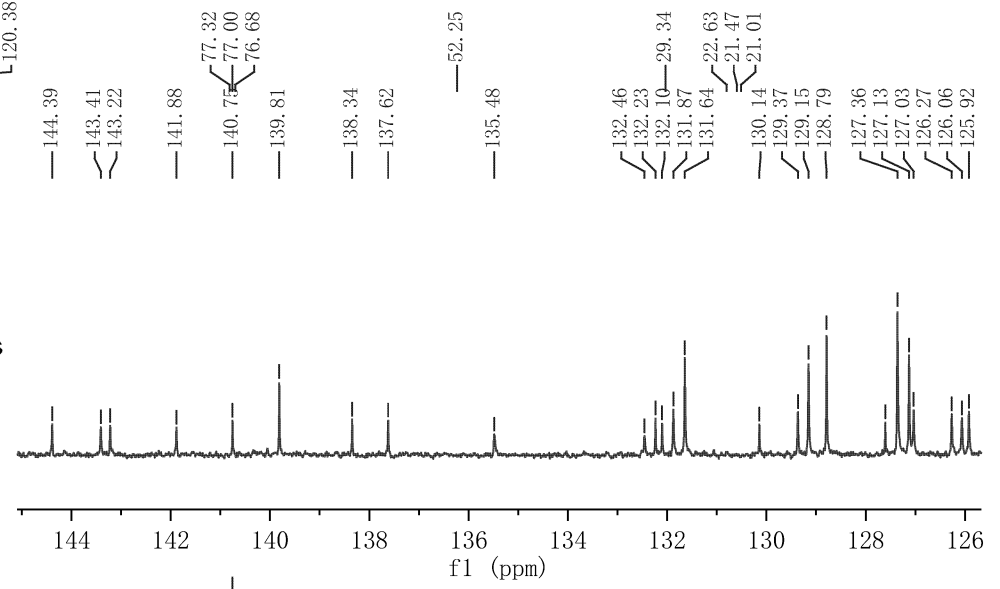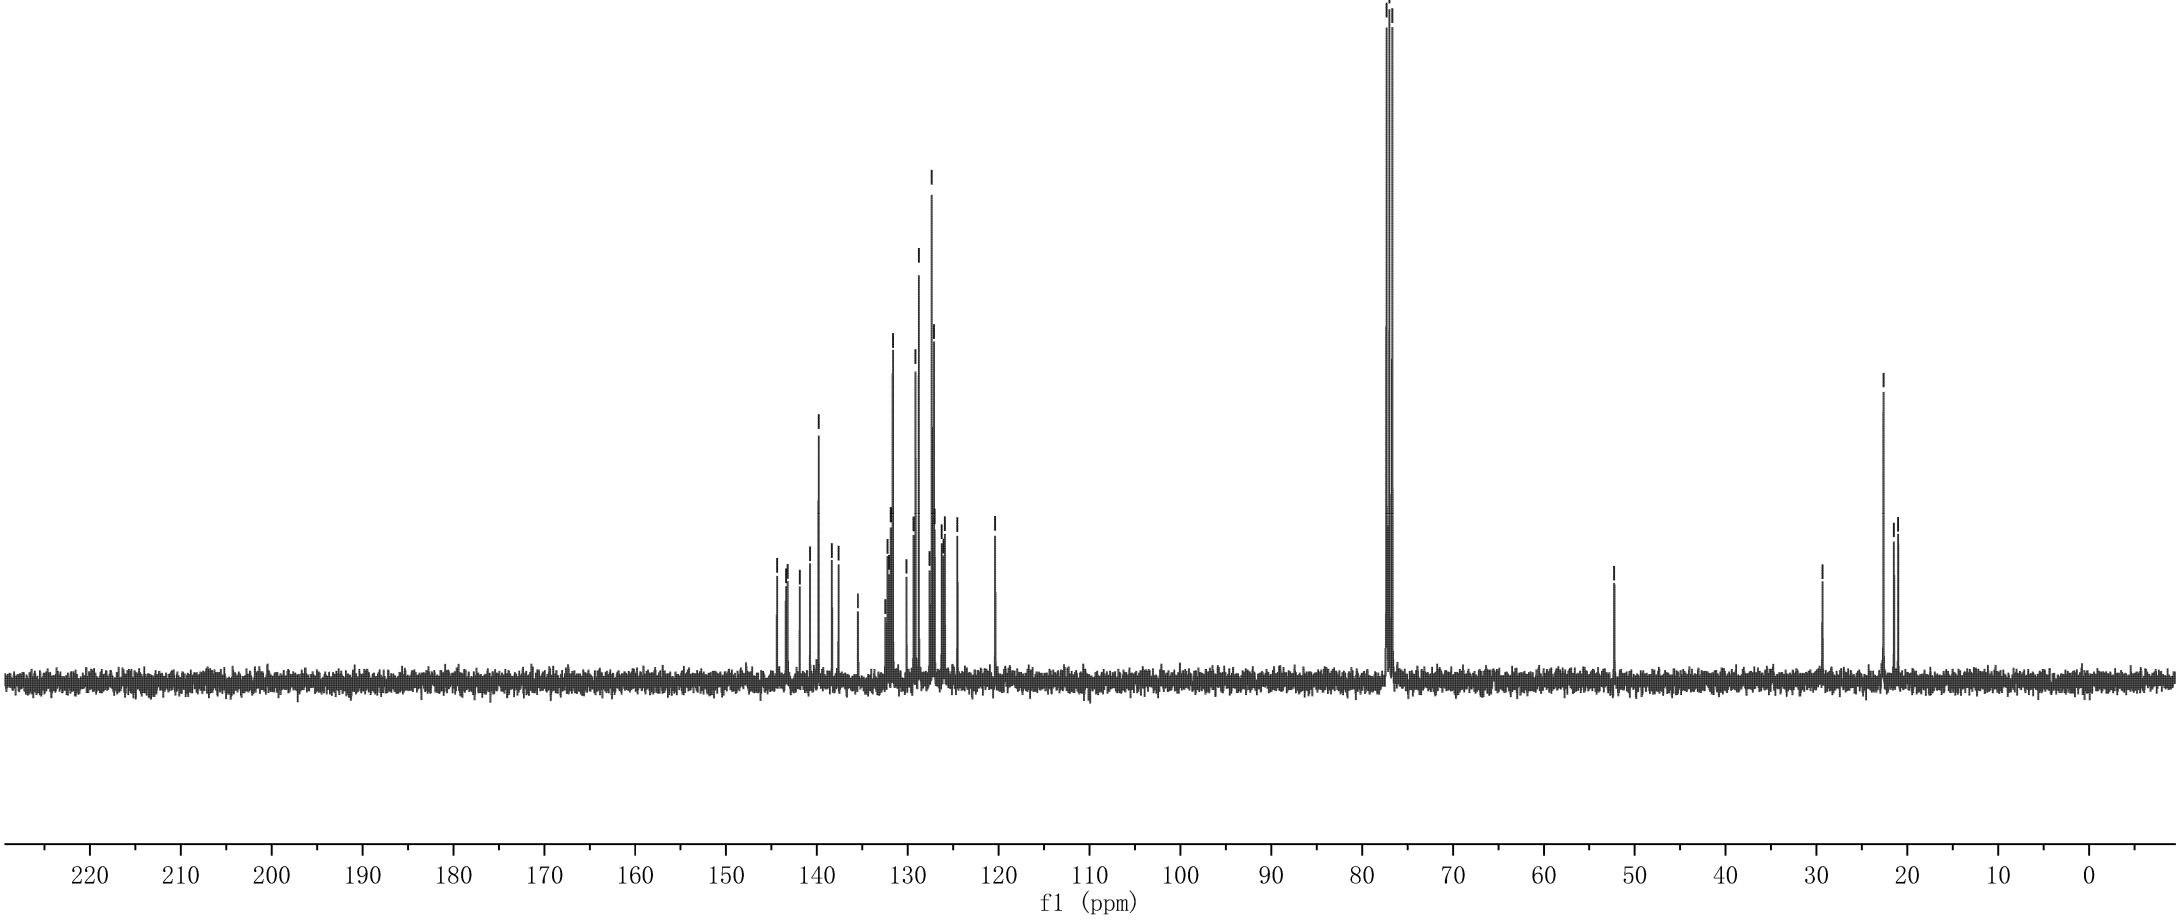

7.684  
7.672  
7.663  
7.650  
7.605  
7.294  
7.290  
7.273  
7.268  
7.231  
7.227  
7.215  
7.210  
7.188  
7.172  
7.146  
7.141  
7.124  
7.107  
7.037  
7.017  
6.868

4.073  
4.041  
4.021  
4.010  
3.798  
3.778  
3.746  
3.724

2.480  
2.450  
2.431  
2.421  
2.398  
2.359  
2.348  
2.329  
2.292

0.000

| Parameter                | Value               |
|--------------------------|---------------------|
| 1 Title                  | zzx-11-198-H        |
| 2 Origin                 | Bruker BioSpin GmbH |
| 3 Solvent                | CDC13               |
| 4 Temperature            | 298.4               |
| 5 Number of Scans        | 11                  |
| 6 Acquisition Time       | 3.9846              |
| 7 Acquisition Date       | 2020-12-22T15:35:22 |
| 8 Spectrometer Frequency | 400.03              |
| 9 Spectral Width         | 8223.7              |

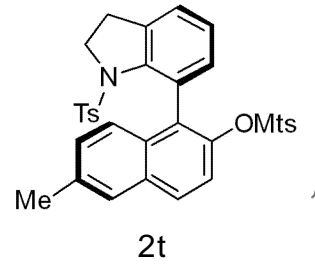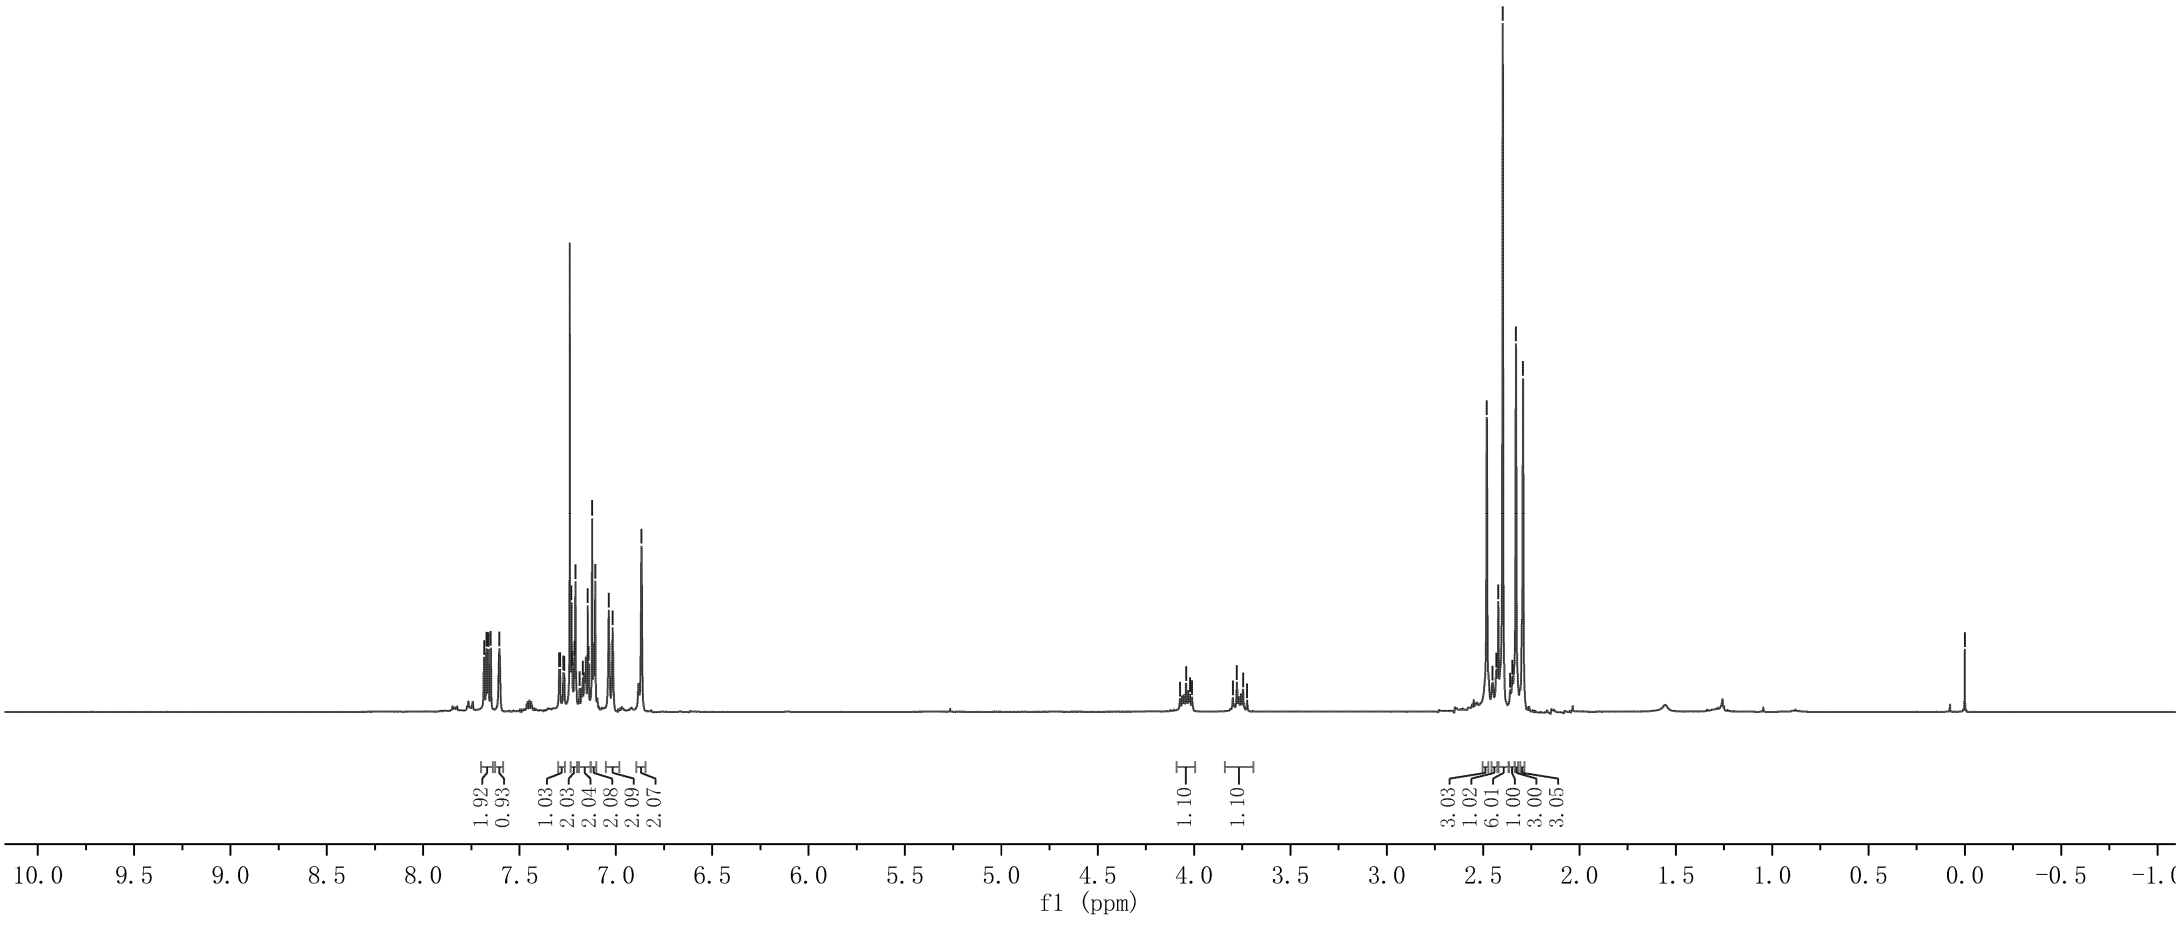

| Parameter                | Value               |
|--------------------------|---------------------|
| 1 Title                  | zzx-11-198-C        |
| 2 Origin                 | Bruker BioSpin GmbH |
| 3 Solvent                | CDC13               |
| 4 Temperature            | 299.0               |
| 5 Number of Scans        | 59                  |
| 6 Acquisition Time       | 1.3631              |
| 7 Acquisition Date       | 2020-12-22T15:38:43 |
| 8 Spectrometer Frequency | 100.59              |
| 9 Spectral Width         | 24038.5             |

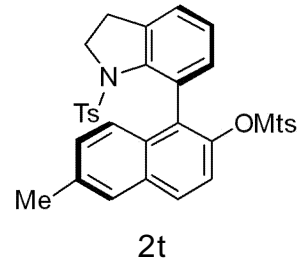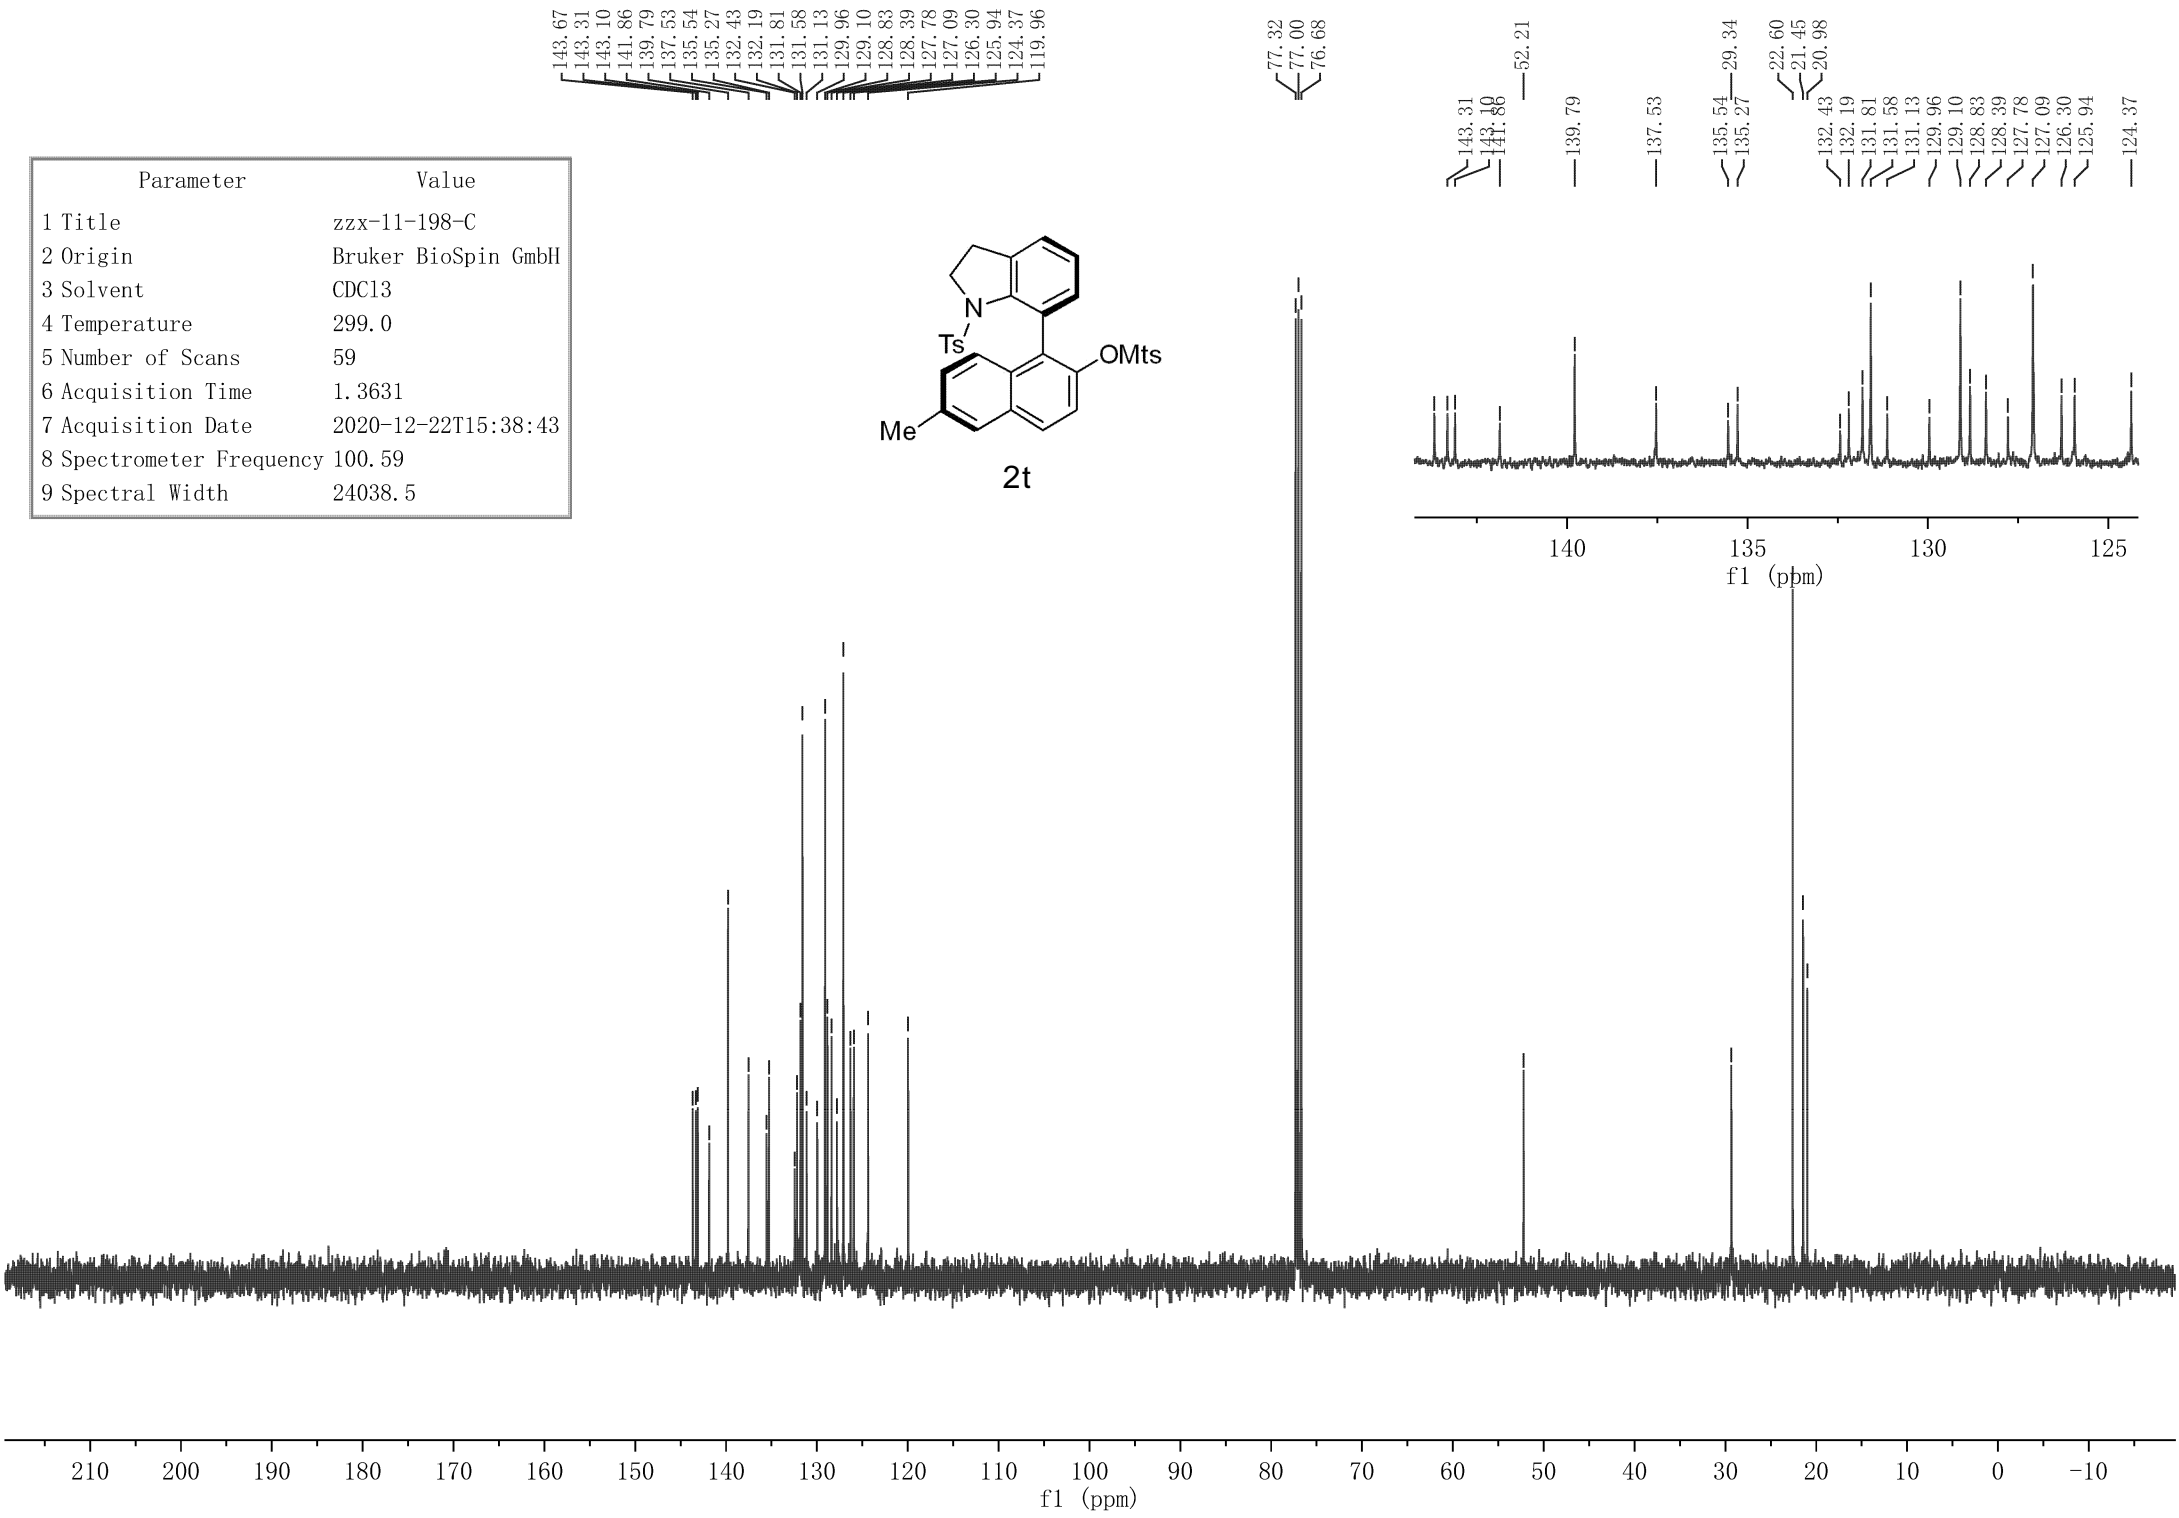



7.684  
7.662  
7.651  
7.628  
7.239  
7.218  
7.173  
7.130  
7.108  
7.101  
7.047  
7.027  
6.874

4.075  
4.044  
4.032  
4.012  
3.903  
3.799  
3.778  
3.756  
3.725

2.495  
2.474  
2.455  
2.435  
2.400  
2.339  
2.303

— 0.000

| Parameter                | Value               |
|--------------------------|---------------------|
| 1 Title                  | zzx-12-22-H         |
| 2 Origin                 | Bruker BioSpin GmbH |
| 3 Solvent                | CDC13               |
| 4 Temperature            | 298.0               |
| 5 Number of Scans        | 4                   |
| 6 Acquisition Time       | 4.0894              |
| 7 Acquisition Date       | 2021-01-01 16:49:38 |
| 8 Spectrometer Frequency | 400.13              |
| 9 Spectral Width         | 8012.8              |

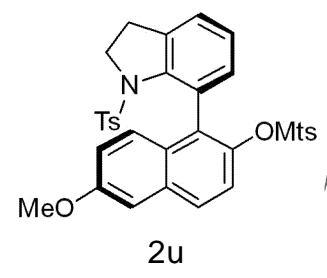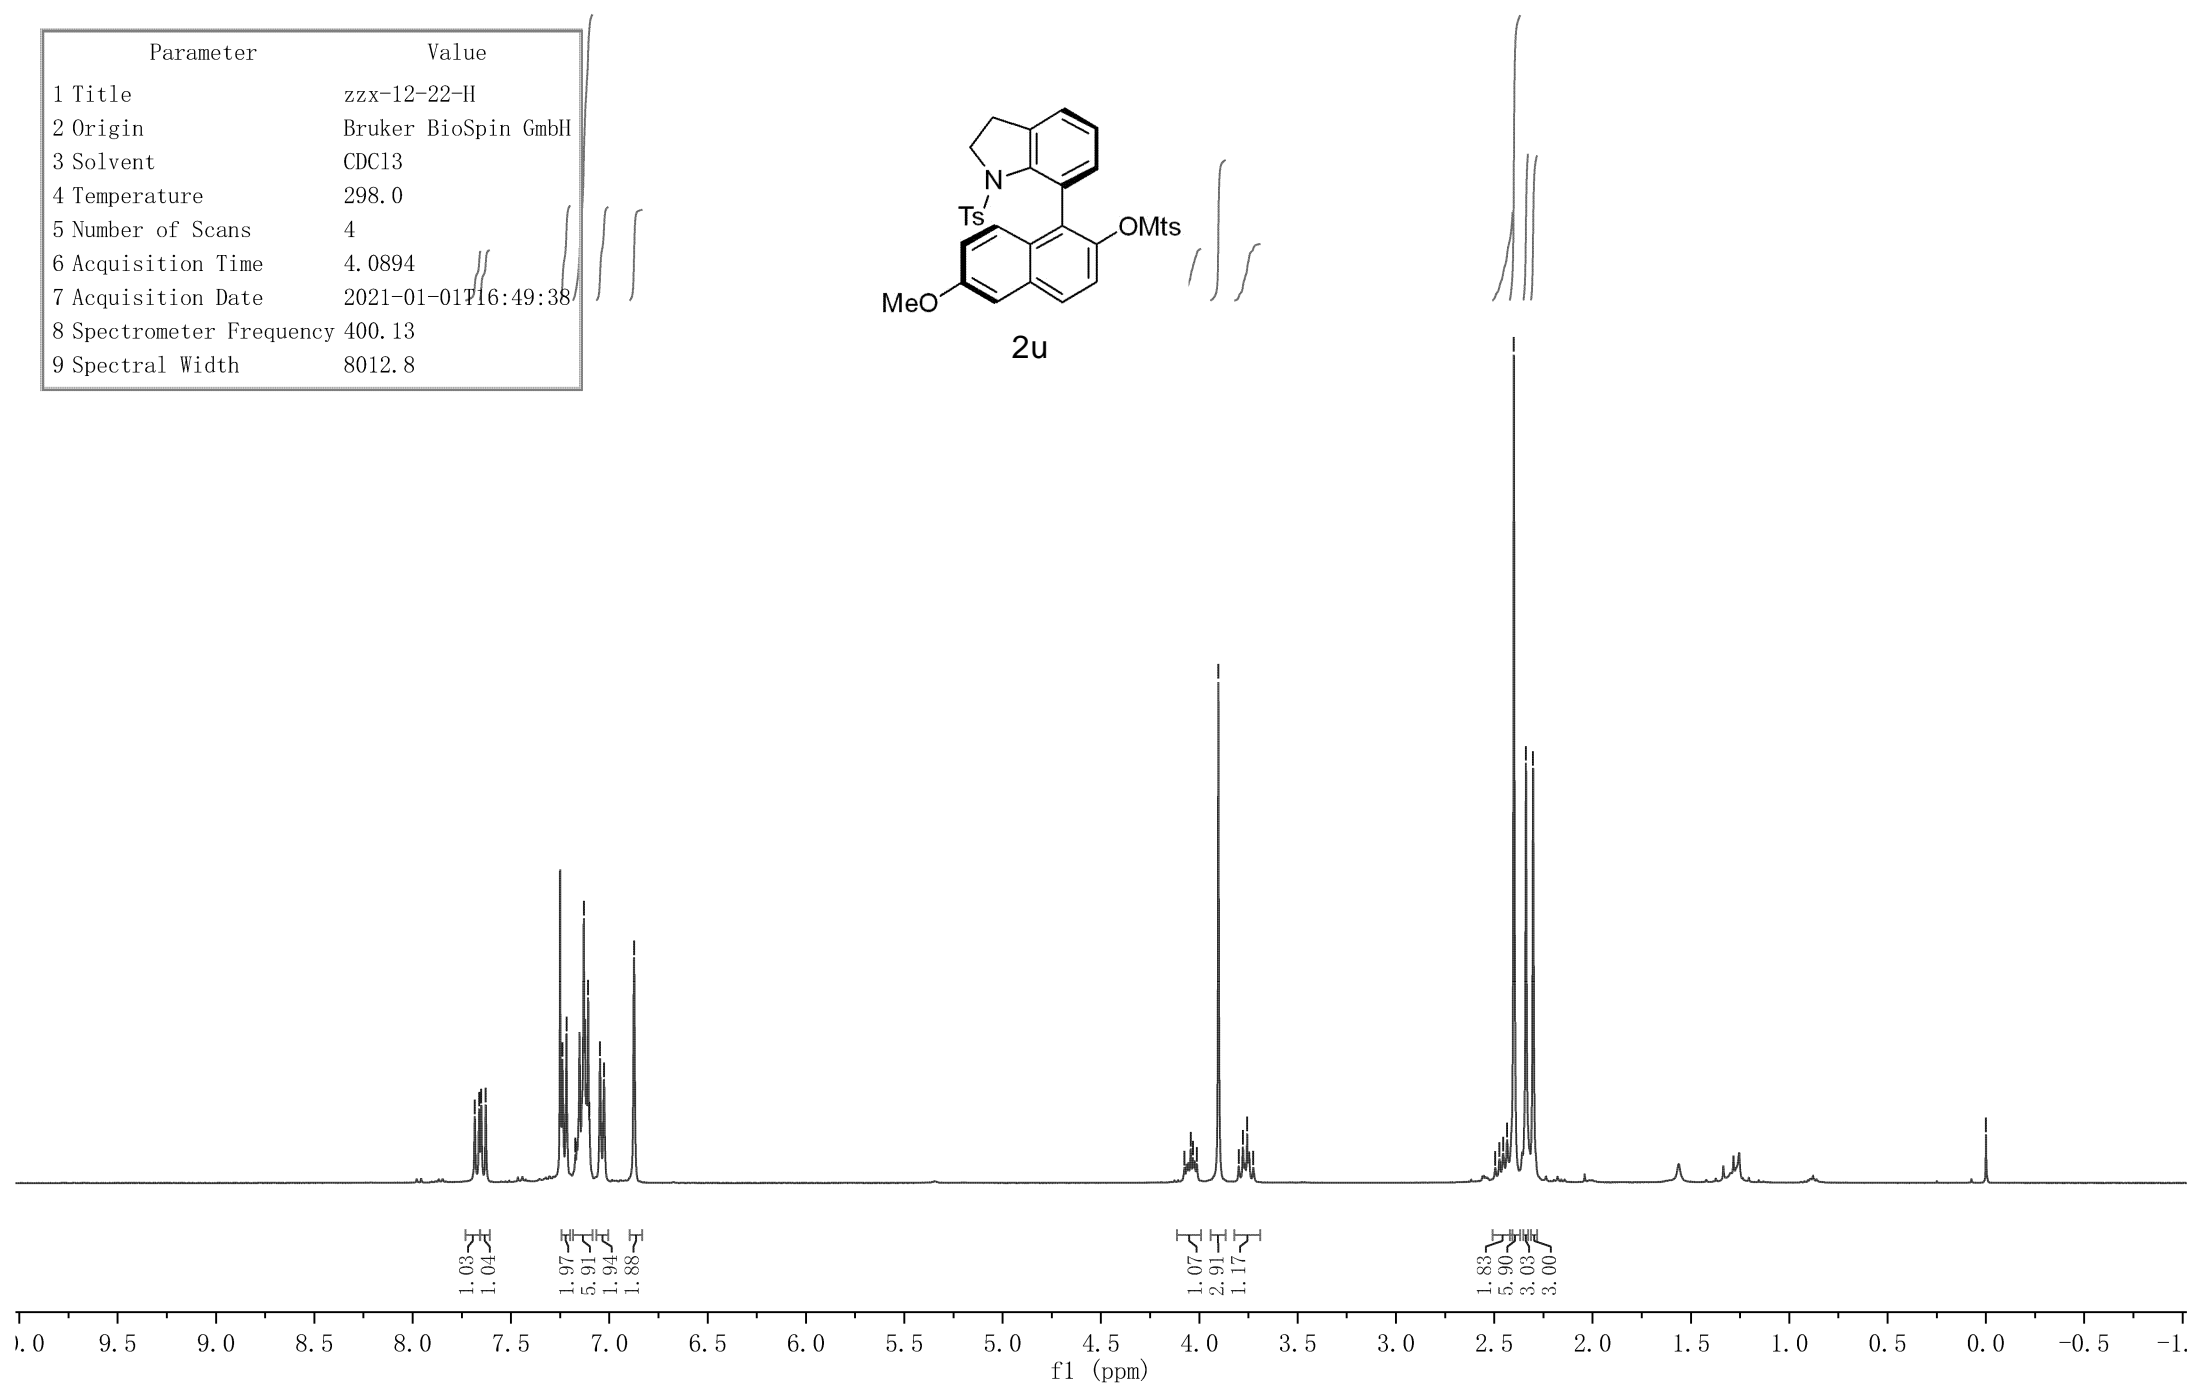

| Parameter                | Value               |
|--------------------------|---------------------|
| 1 Title                  | zzx-12-22-C         |
| 2 Origin                 | Bruker BioSpin GmbH |
| 3 Solvent                | CDC13               |
| 4 Temperature            | 300.0               |
| 5 Number of Scans        | 136                 |
| 6 Acquisition Time       | 1.3631              |
| 7 Acquisition Date       | 2021-01-01T16:51:15 |
| 8 Spectrometer Frequency | 100.61              |
| 9 Spectral Width         | 24038.5             |

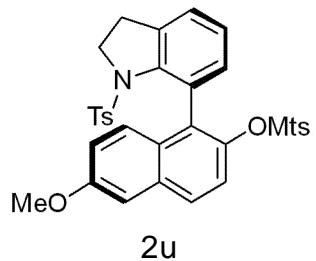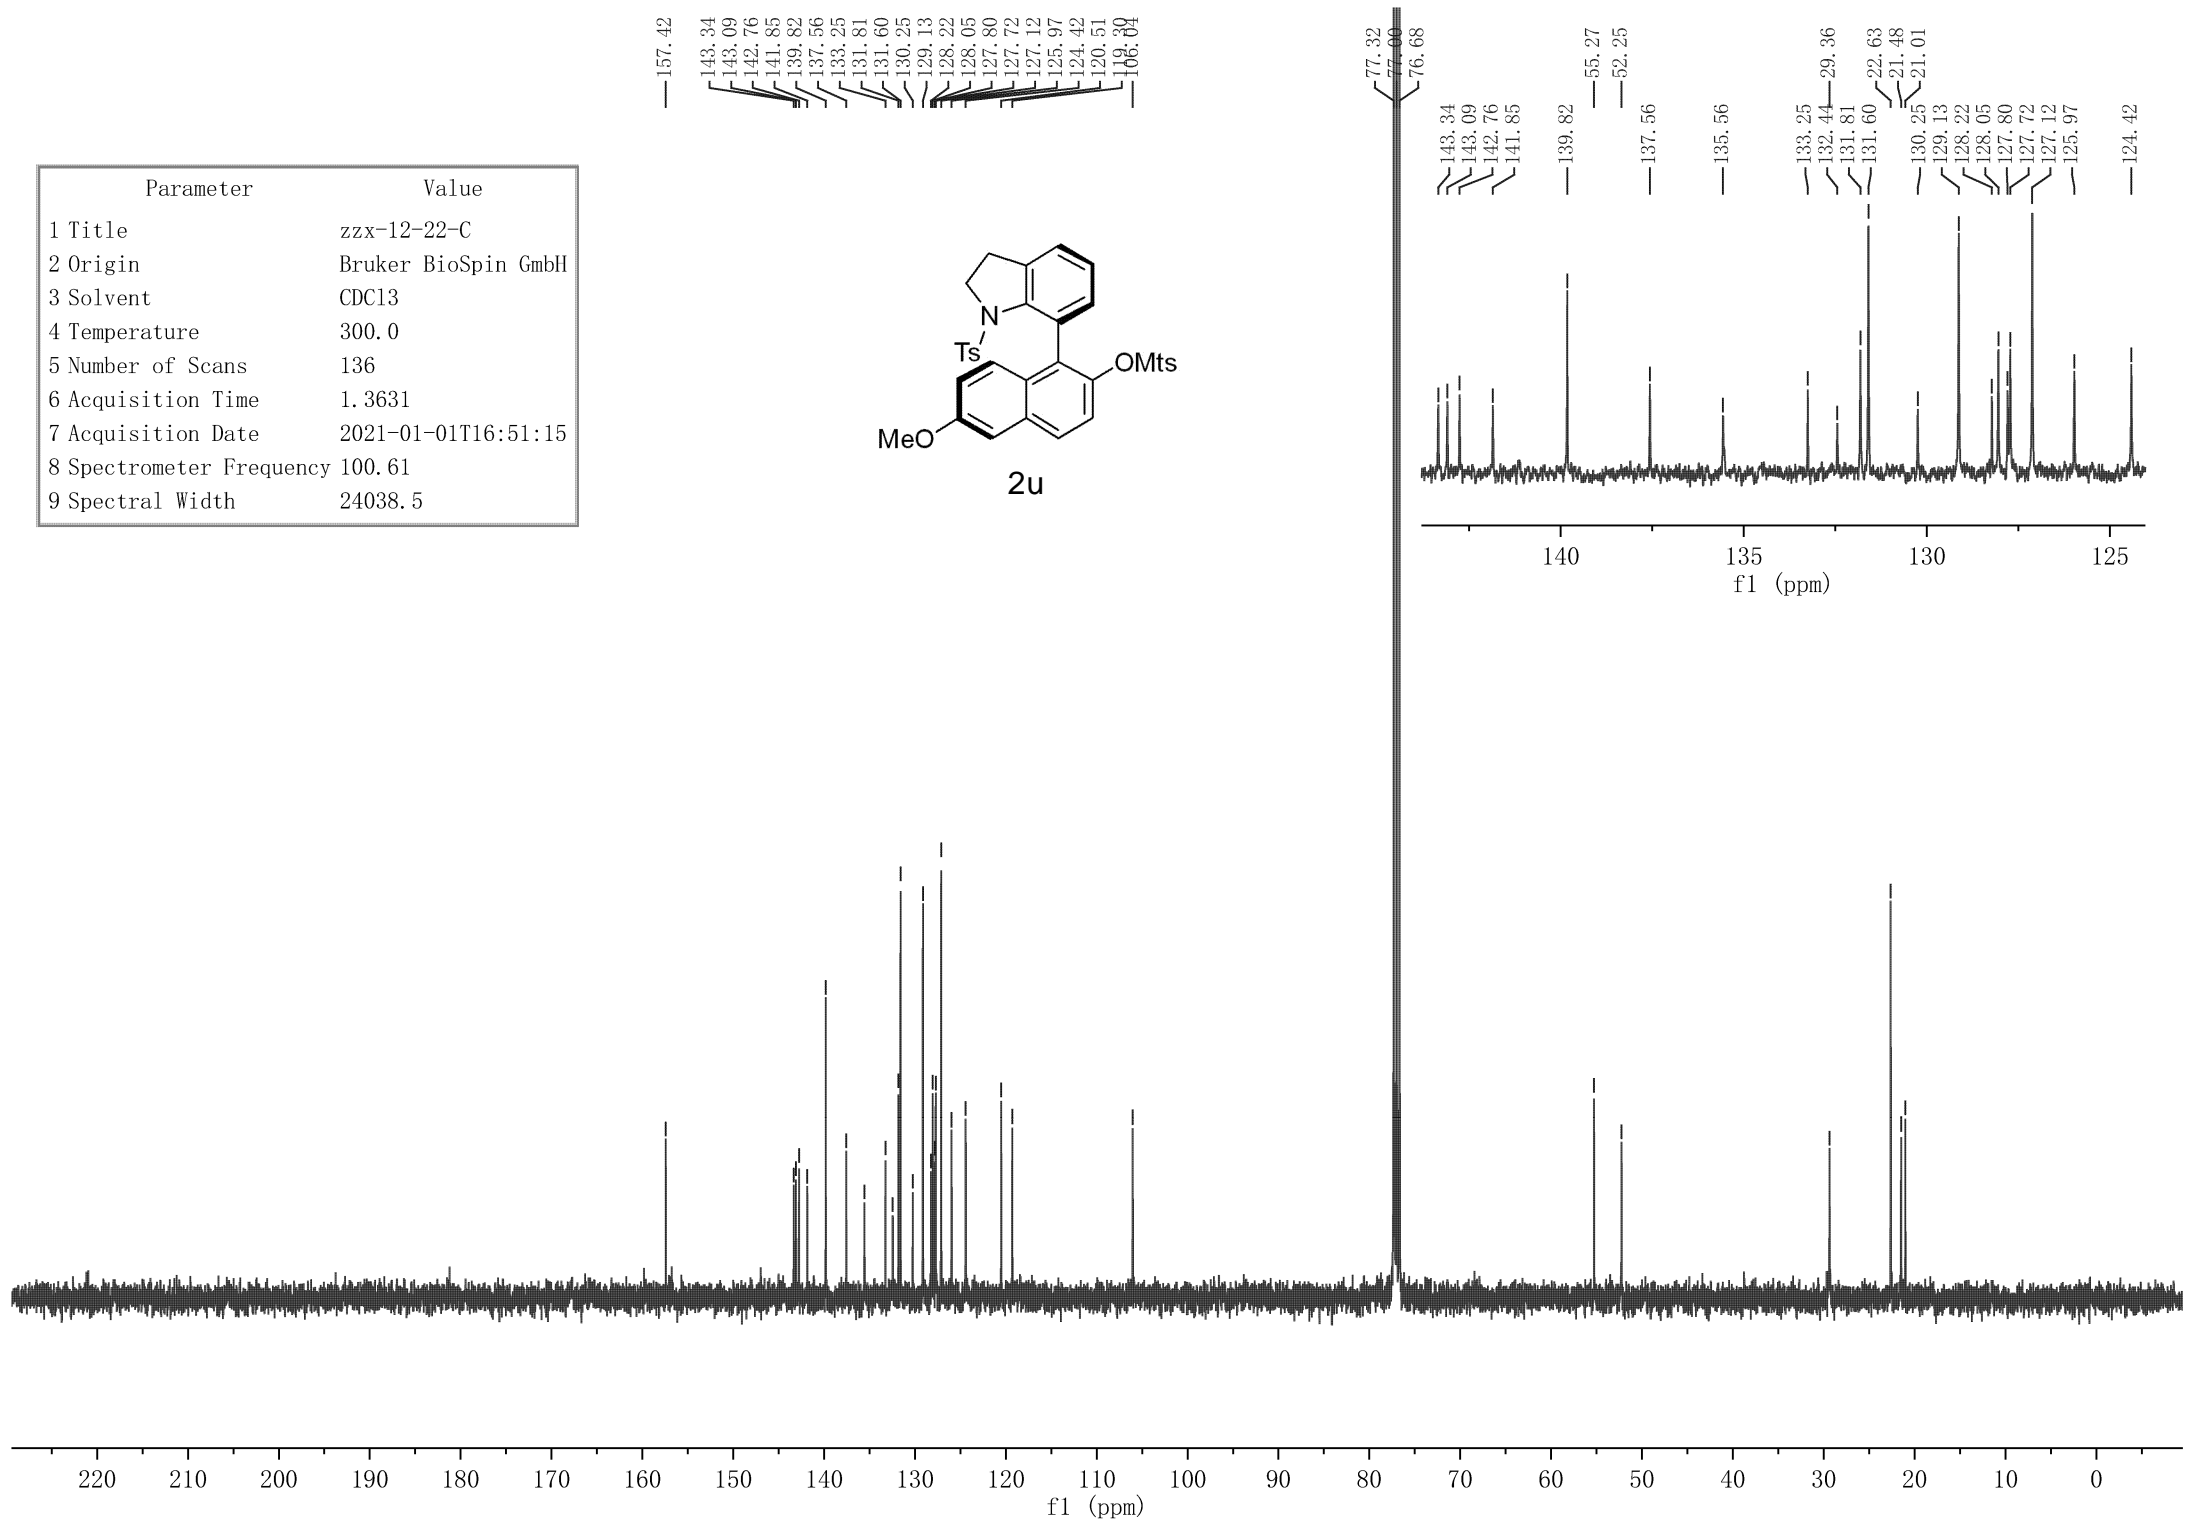

7.853  
7.849  
7.745  
7.720  
7.697  
7.539  
7.535  
7.518  
7.513  
7.257  
7.244  
7.237  
7.222  
7.192  
7.153  
7.135  
7.111  
7.056  
7.036  
6.891

4.079  
4.046  
4.034  
4.014  
3.851  
3.831  
3.799  
3.778

2.502  
2.481  
2.462  
2.442  
2.428  
2.335  
2.305  
2.289  
2.282  
2.267

— 0.000

| Parameter                | Value               |
|--------------------------|---------------------|
| 1 Title                  | zzx-11-121-H        |
| 2 Origin                 | Bruker BioSpin GmbH |
| 3 Solvent                | CDC13               |
| 4 Temperature            | 298.0               |
| 5 Number of Scans        | 7                   |
| 6 Acquisition Time       | 4.0894              |
| 7 Acquisition Date       | 2020-11-14T15:20:35 |
| 8 Spectrometer Frequency | 400.13              |
| 9 Spectral Width         | 8012.8              |

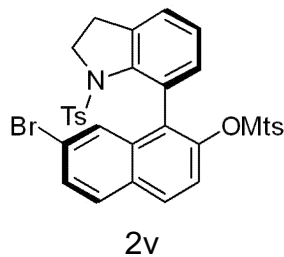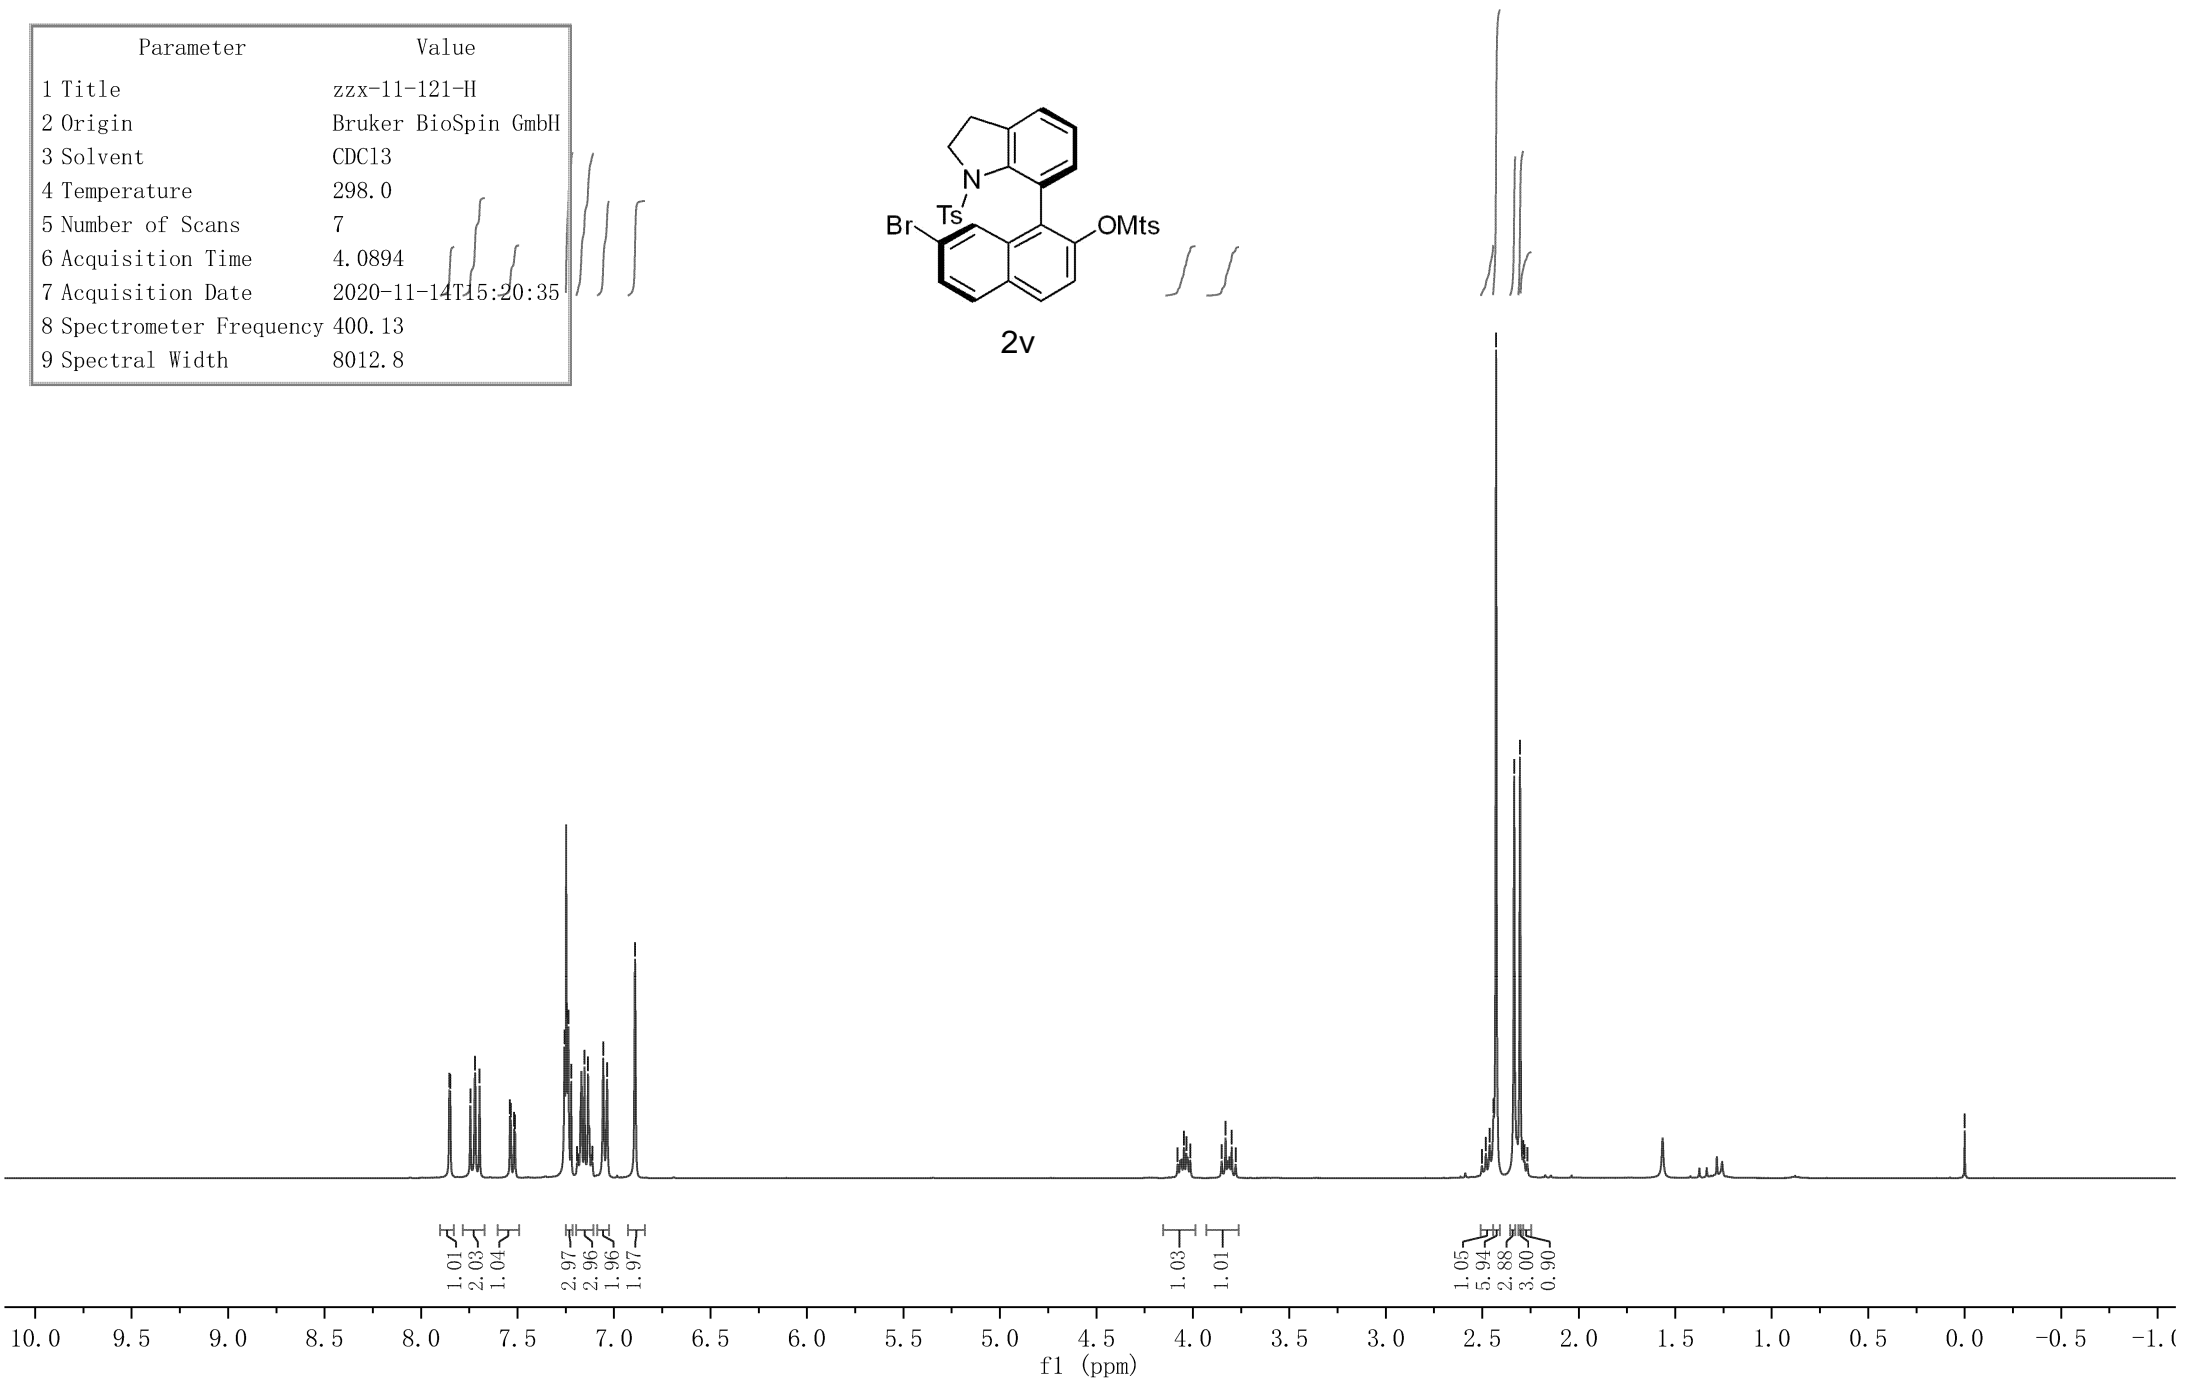

| Parameter                | Value               |
|--------------------------|---------------------|
| 1 Title                  | zzx-11-121-C        |
| 2 Origin                 | Bruker BioSpin GmbH |
| 3 Solvent                | CDC13               |
| 4 Temperature            | 300.0               |
| 5 Number of Scans        | 41                  |
| 6 Acquisition Time       | 1.3631              |
| 7 Acquisition Date       | 2020-11-14T15:22:06 |
| 8 Spectrometer Frequency | 100.61              |
| 9 Spectral Width         | 24038.5             |

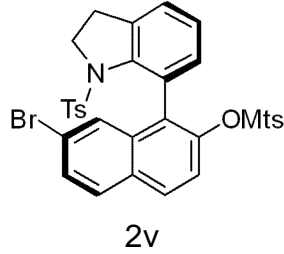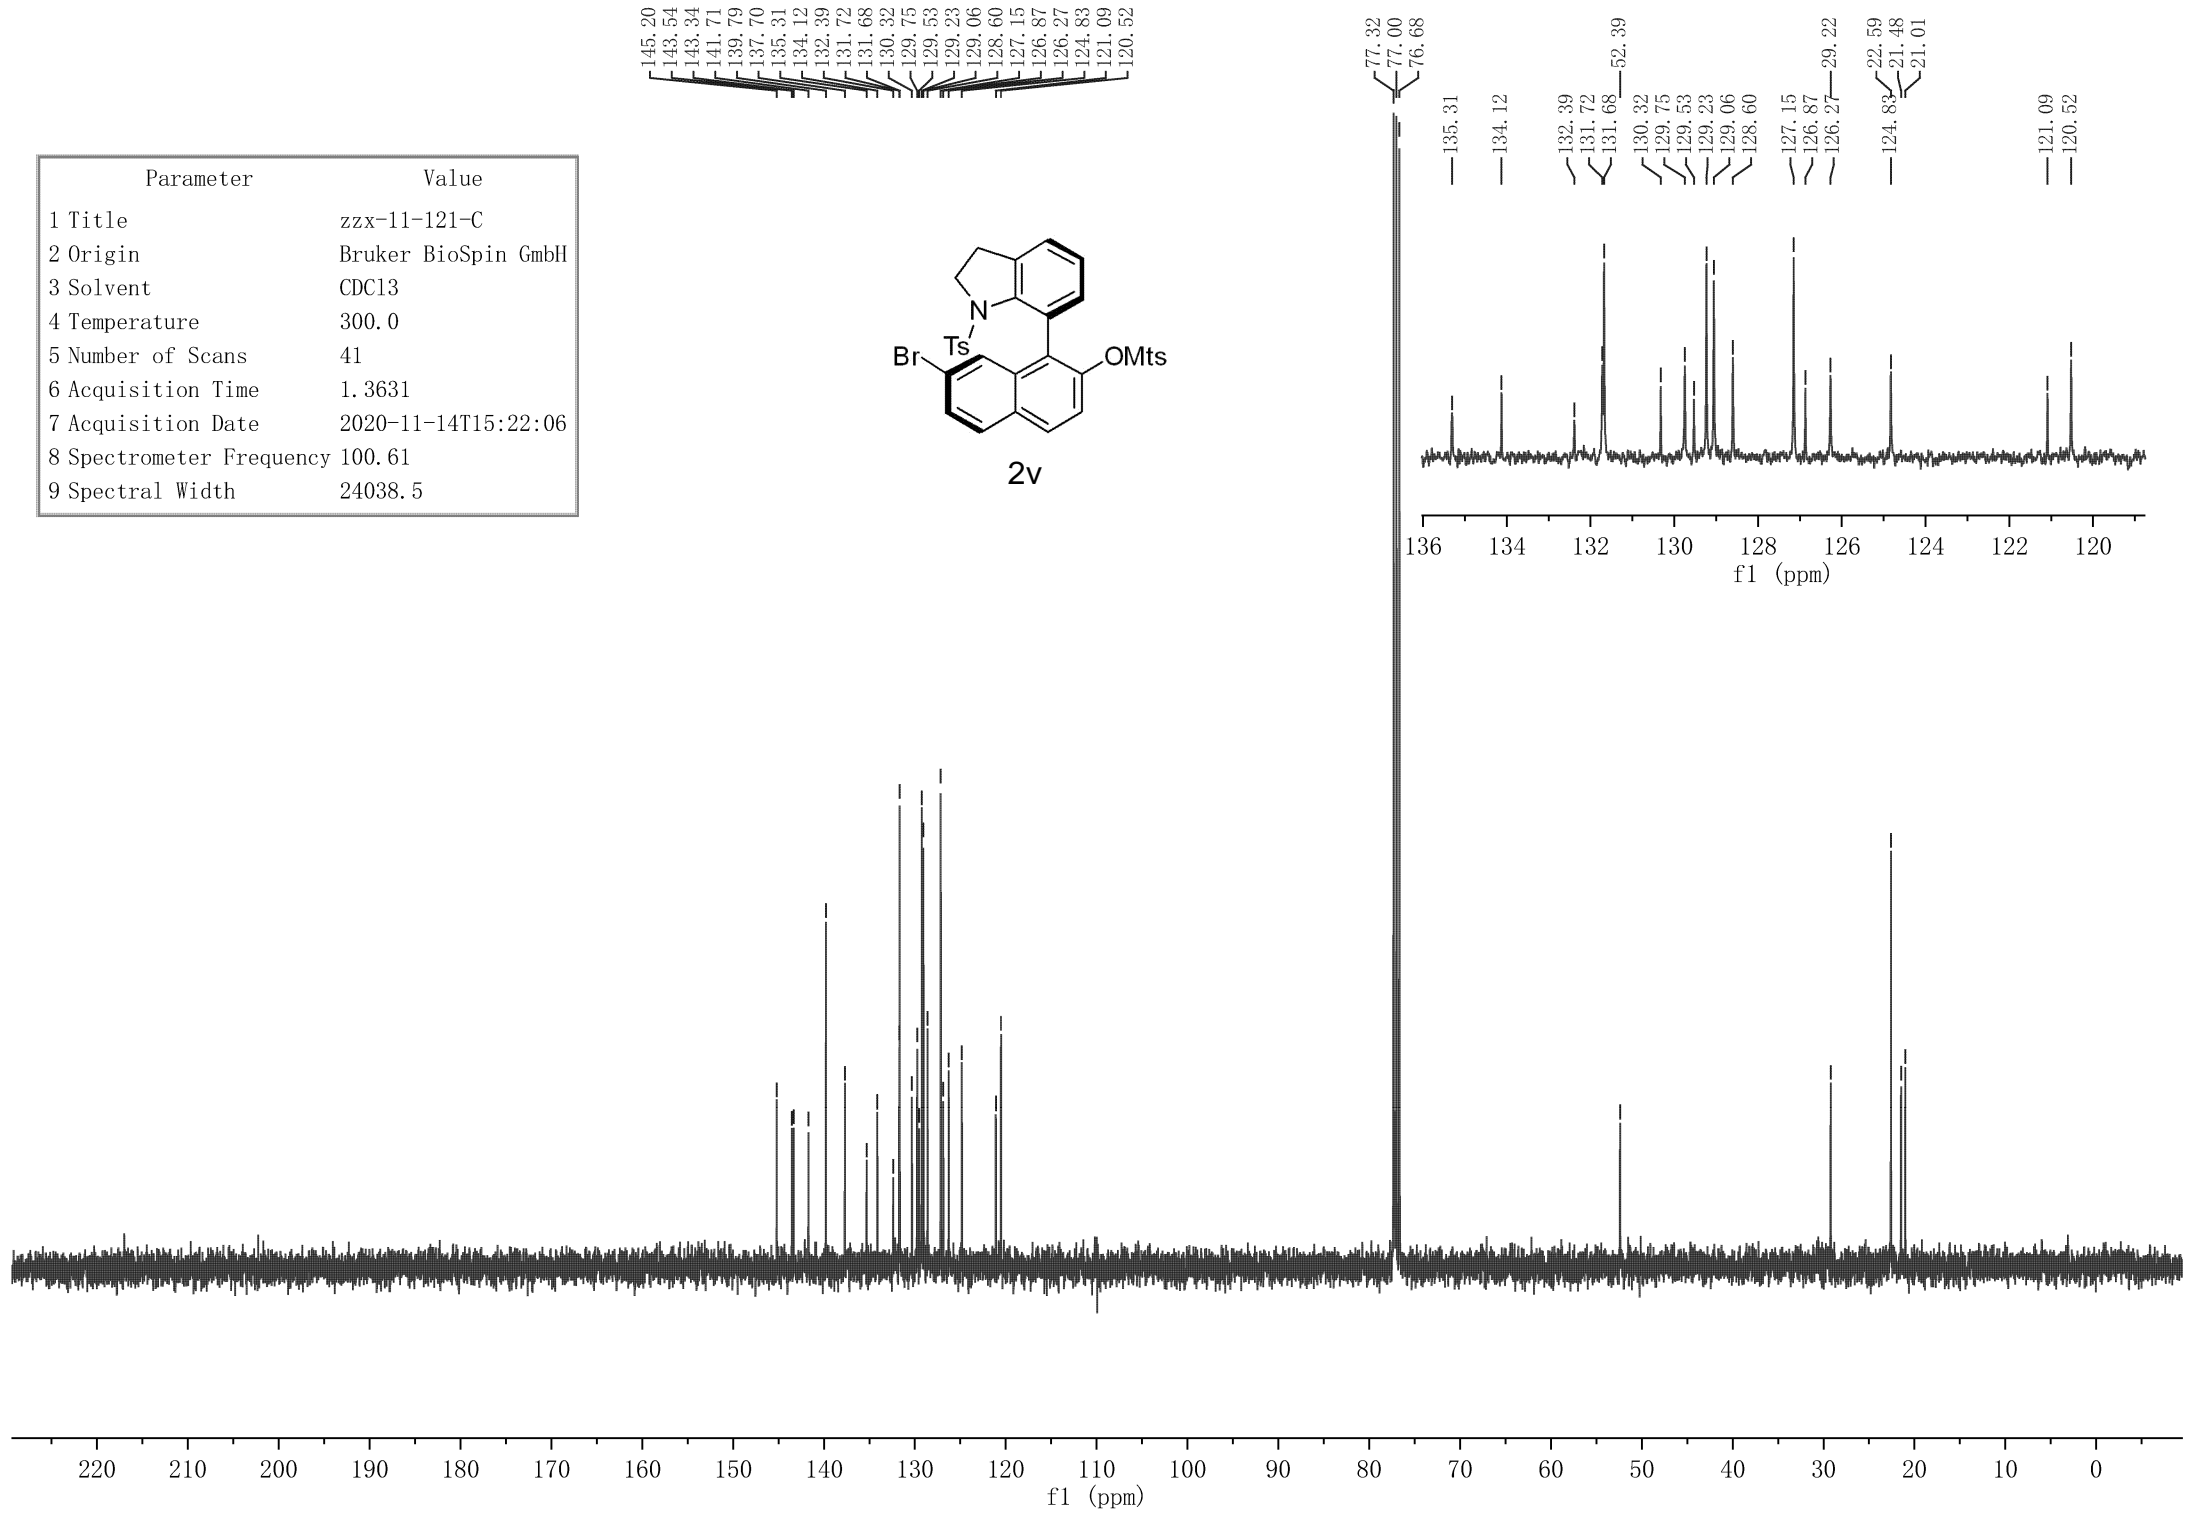

7.930  
7.916  
7.894  
7.784  
7.762  
7.721  
7.700  
7.574  
7.555  
7.422  
7.403  
7.318  
7.300  
7.256  
7.199  
7.175  
7.119  
6.993  
6.973  
6.886

4.114  
4.083  
4.065  
4.052  
3.850  
3.830  
3.799  
3.779

2.559  
2.539  
2.520  
2.500  
2.479  
2.431  
2.310  
2.300

— 0.000

| Parameter                | Value               |
|--------------------------|---------------------|
| 1 Title                  | zzx-11-167-H        |
| 2 Origin                 | Bruker BioSpin GmbH |
| 3 Solvent                | CDC13               |
| 4 Temperature            | 298.0               |
| 5 Number of Scans        | 8                   |
| 6 Acquisition Time       | 4.0894              |
| 7 Acquisition Date       | 2020-11-29 14:19:41 |
| 8 Spectrometer Frequency | 400.13              |
| 9 Spectral Width         | 8012.8              |

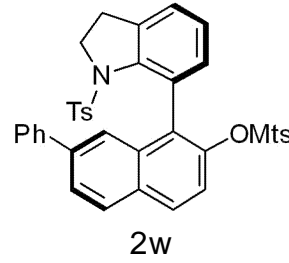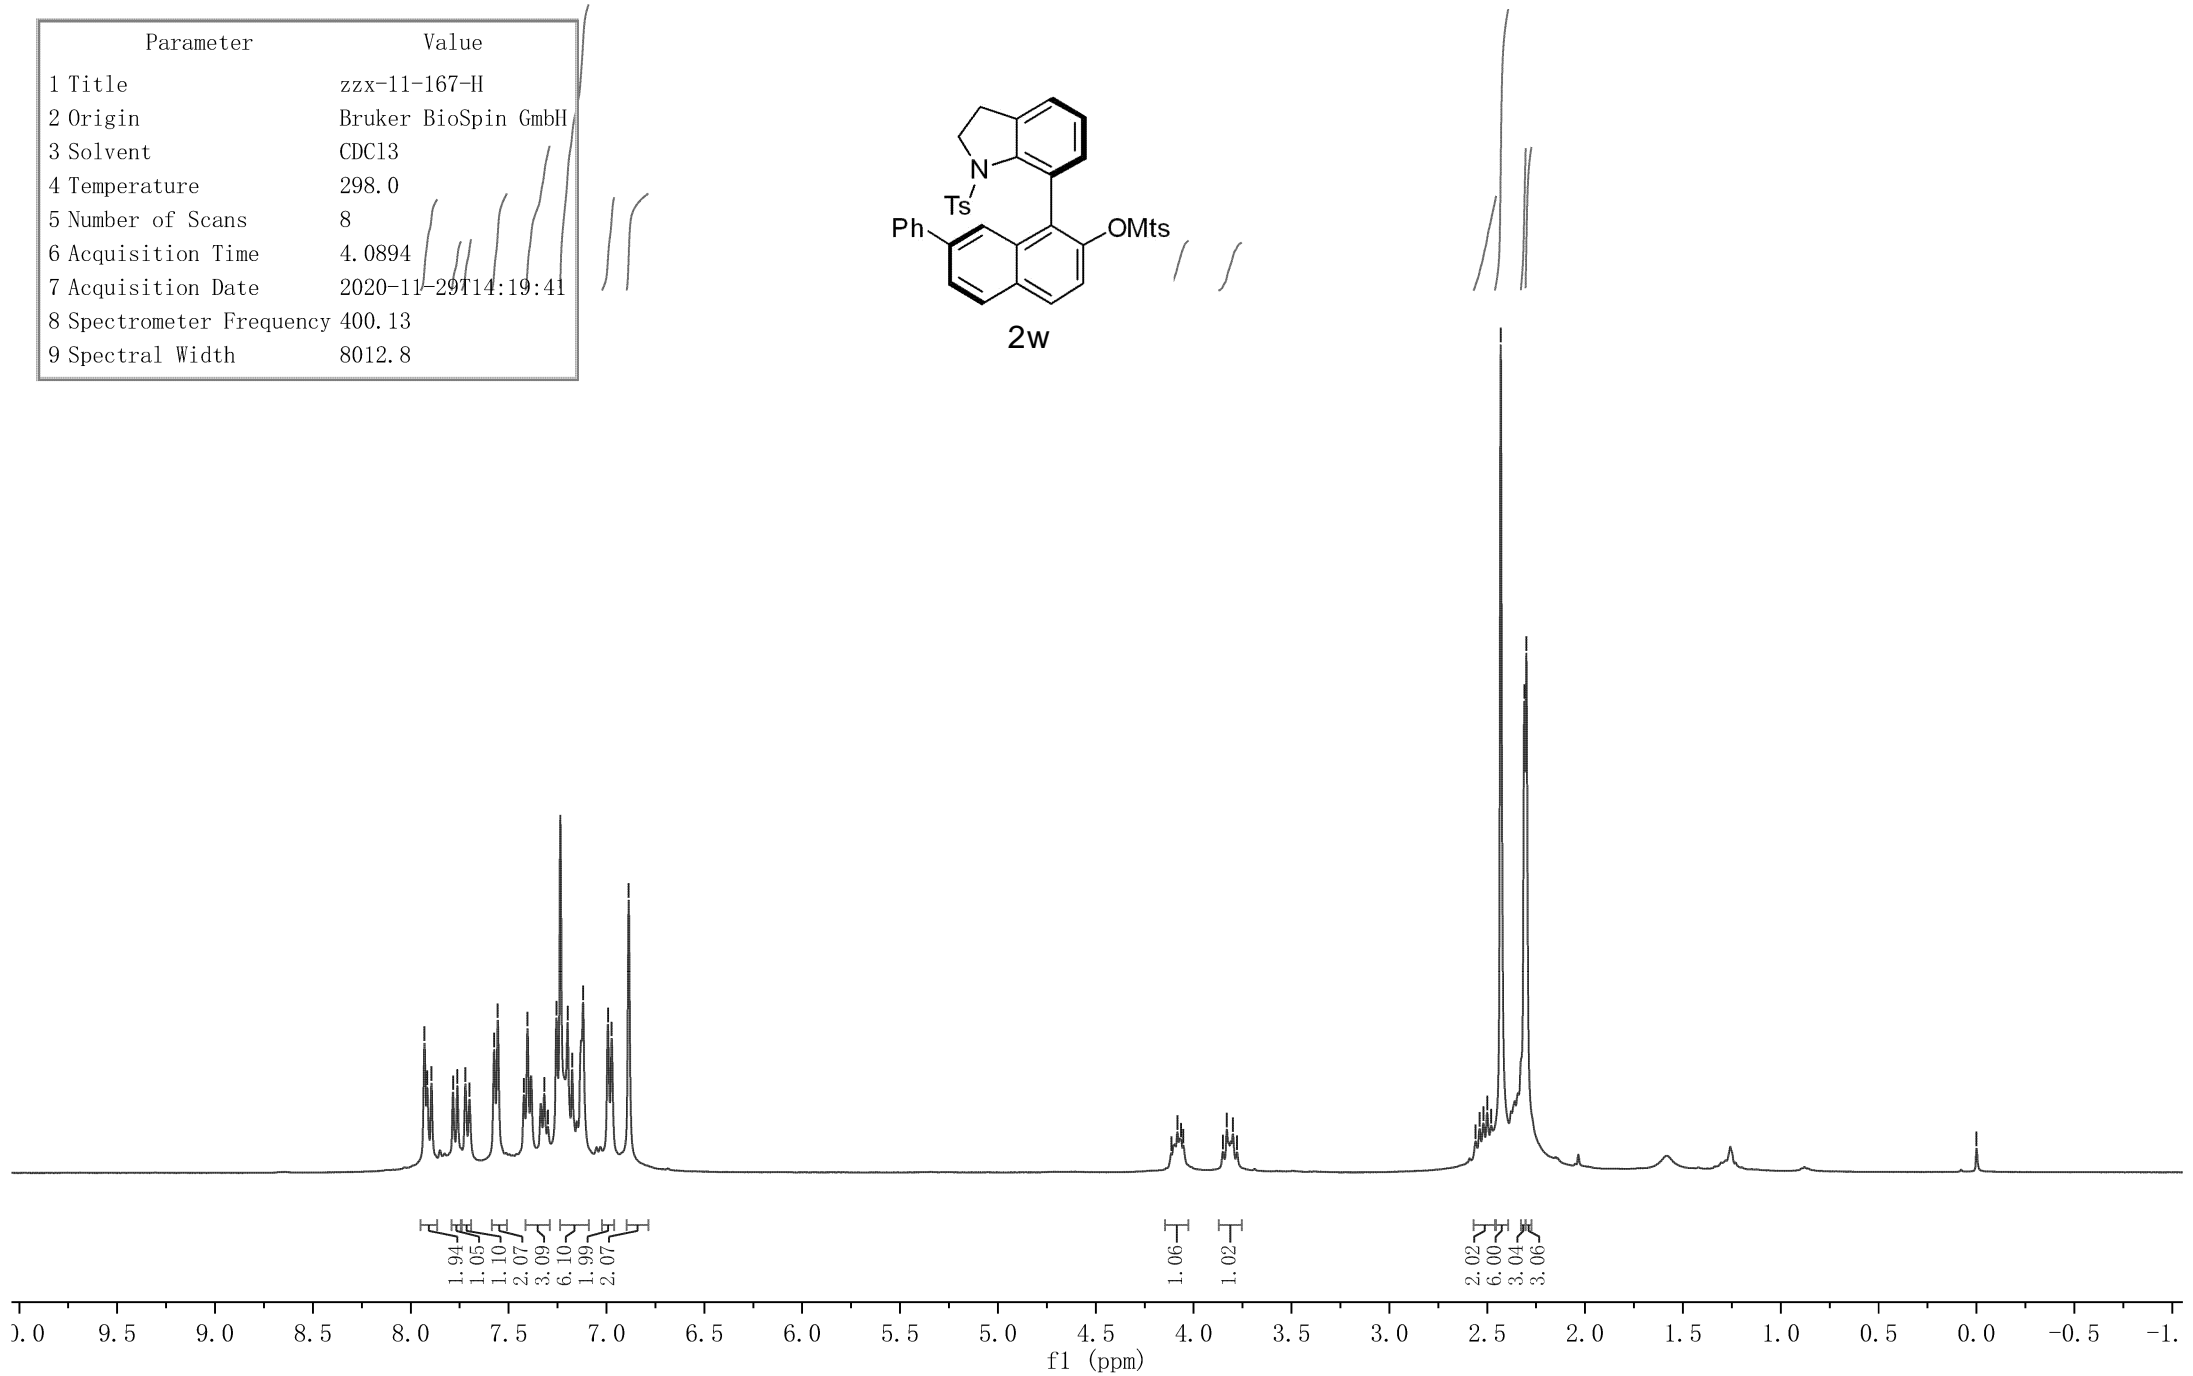

| Parameter                | Value               |
|--------------------------|---------------------|
| 1 Title                  | zzx-11-167-C        |
| 2 Origin                 | Bruker BioSpin GmbH |
| 3 Solvent                | CDC13               |
| 4 Temperature            | 300.0               |
| 5 Number of Scans        | 129                 |
| 6 Acquisition Time       | 1.3631              |
| 7 Acquisition Date       | 2020-11-29T14:22:25 |
| 8 Spectrometer Frequency | 100.61              |
| 9 Spectral Width         | 24038.5             |

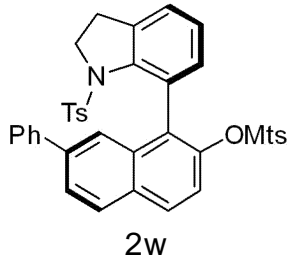

144.82  
143.35  
143.20  
141.84  
141.34  
139.79  
139.15  
137.55  
135.62  
133.15  
132.49  
131.92  
131.64  
131.12  
130.41  
129.10  
128.83  
128.69  
128.55  
127.48  
127.25  
127.07  
126.10  
125.51  
124.68  
124.59  
119.98

77.32  
77.00  
76.68  
133.15  
132.49  
131.92  
131.64  
131.12  
52.43  
130.41  
129.10  
128.83  
128.69  
128.55  
29.40  
127.48  
22.62  
21.45  
127.07  
21.00  
126.10  
125.51  
124.68  
124.59

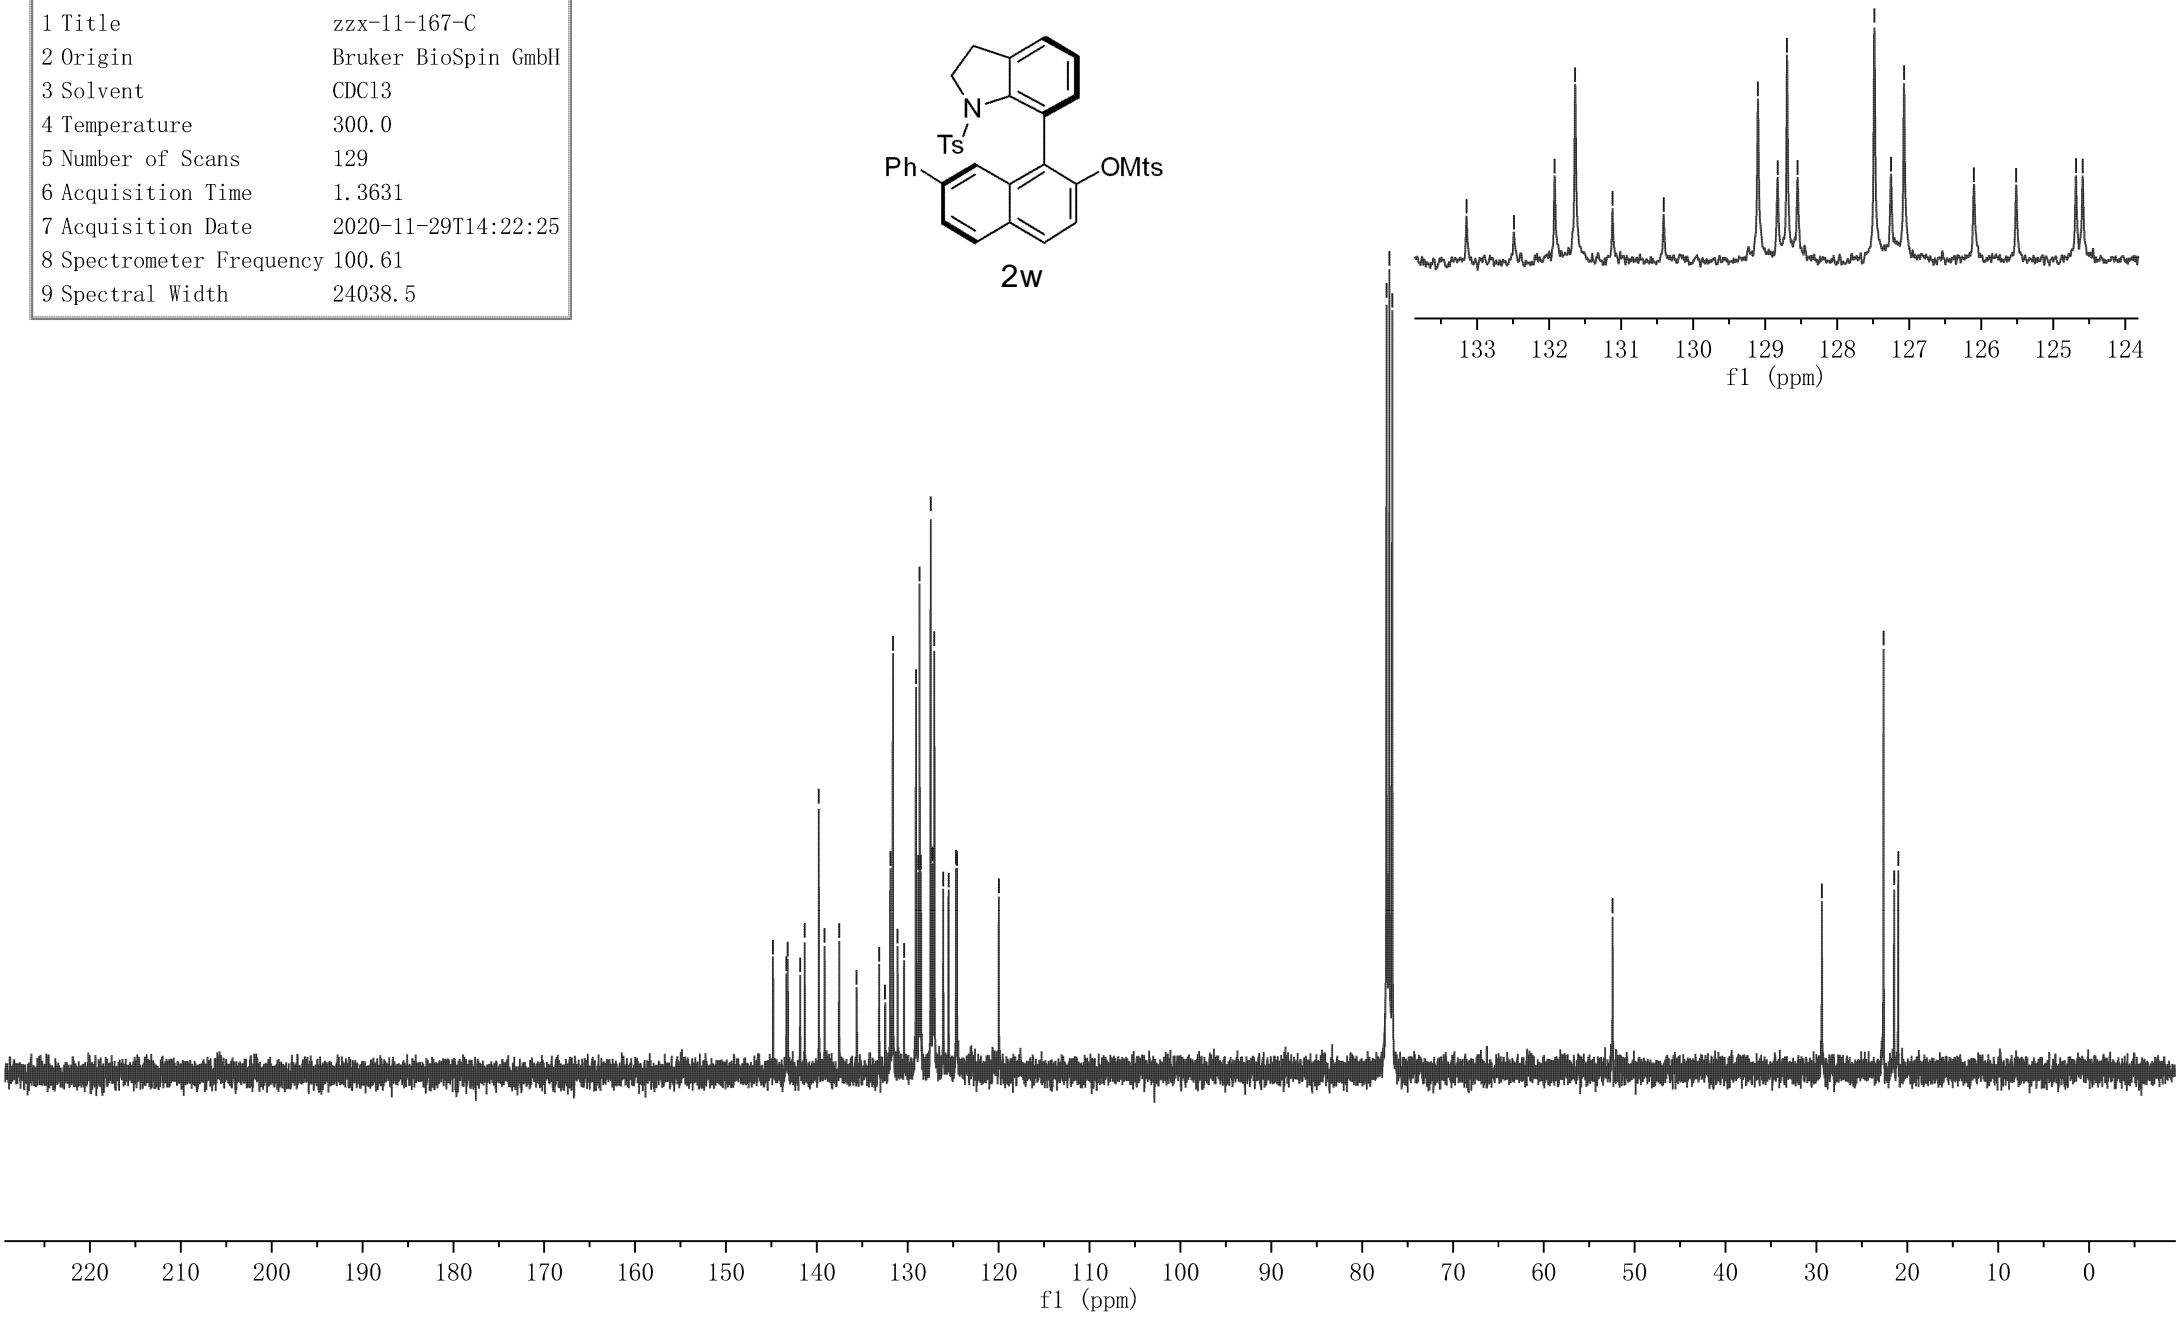

7.737  
7.716  
7.707  
7.684  
7.490  
7.297  
7.293  
7.276  
7.272  
7.239  
7.218  
7.174  
7.119  
7.087  
7.026  
7.006  
6.872

4.101  
4.048  
4.016  
4.002  
3.818  
3.798  
3.766  
3.734

2.558  
2.518  
2.499  
2.460  
2.424  
2.410  
2.321  
2.289

— 0.000

| Parameter                | Value               |
|--------------------------|---------------------|
| 1 Title                  | zzx-11-199-H        |
| 2 Origin                 | Bruker BioSpin GmbH |
| 3 Solvent                | CDC13               |
| 4 Temperature            | 298.3               |
| 5 Number of Scans        | 9                   |
| 6 Acquisition Time       | 3.9846              |
| 7 Acquisition Date       | 2020-12-22T15:46:54 |
| 8 Spectrometer Frequency | 400.03              |
| 9 Spectral Width         | 8223.7              |

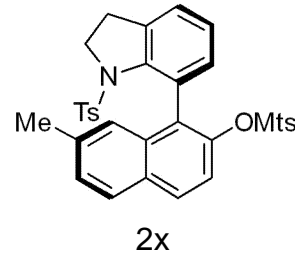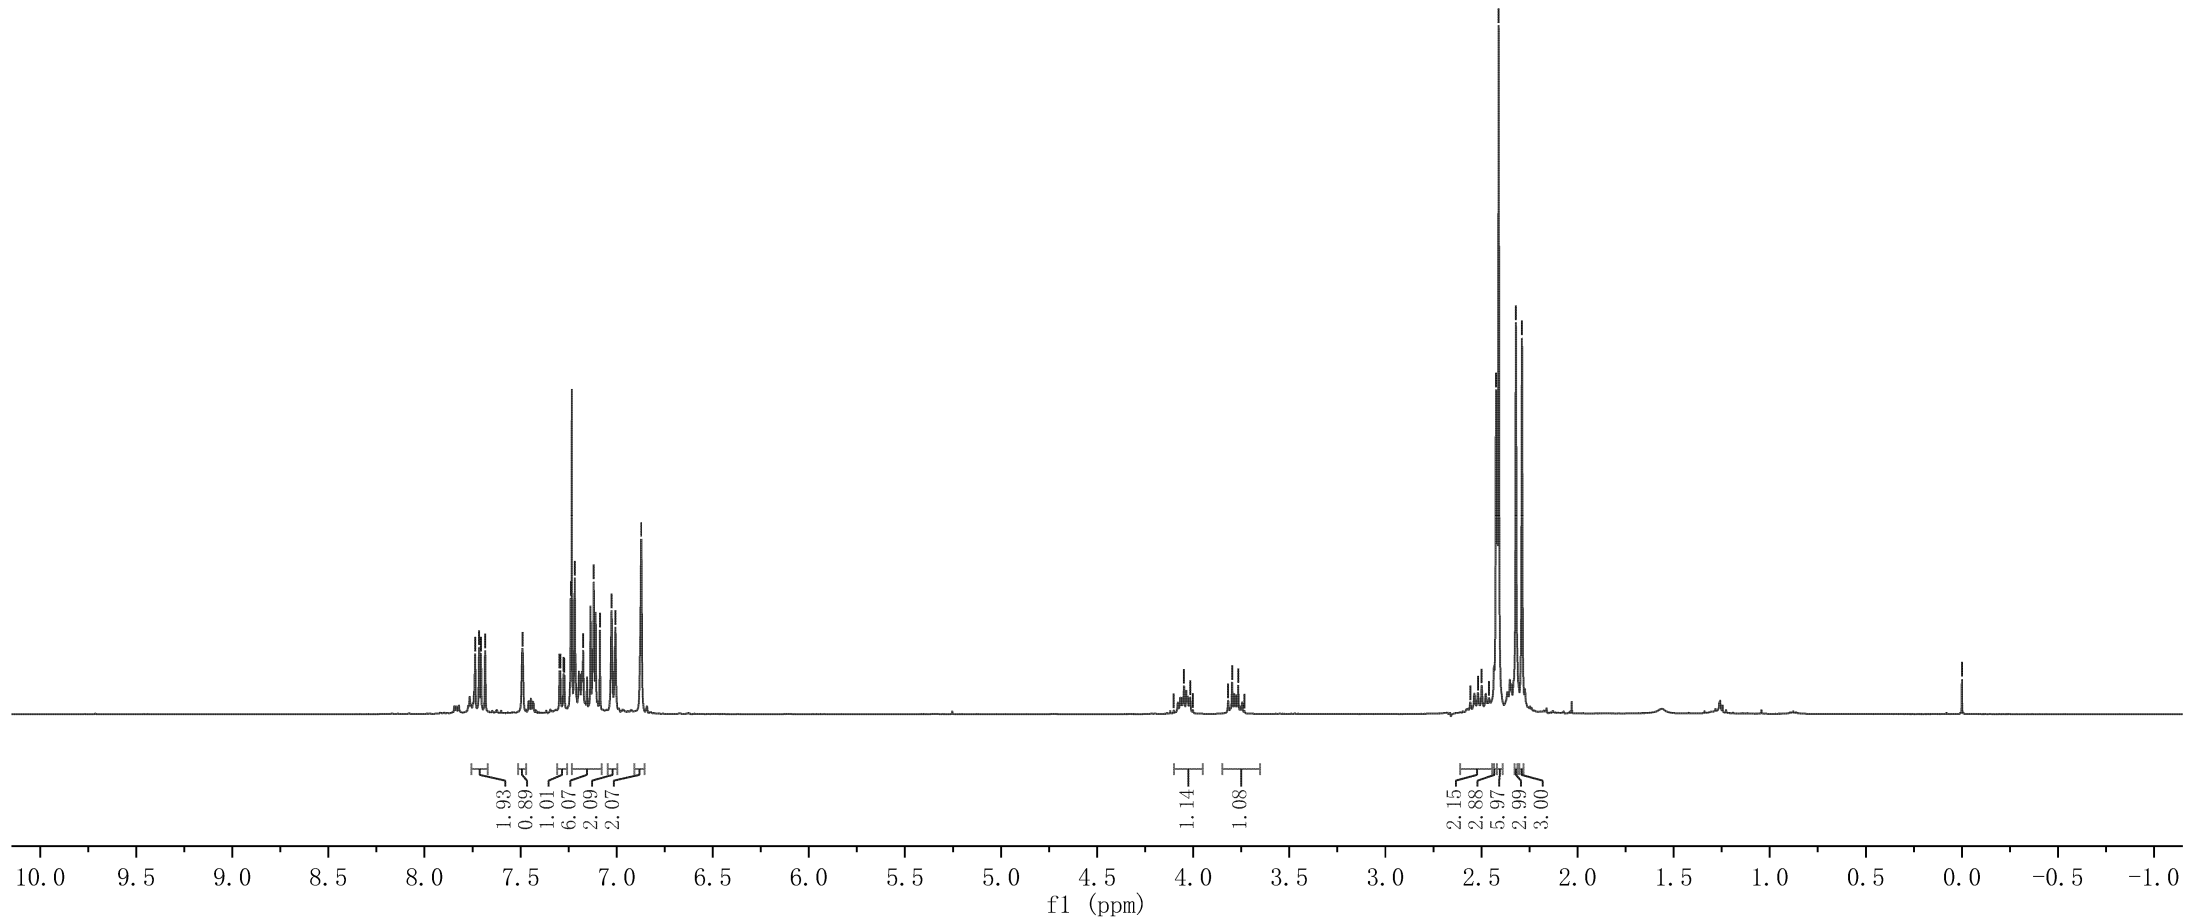

| Parameter                | Value               |
|--------------------------|---------------------|
| 1 Title                  | zzx-11-199-C        |
| 2 Origin                 | Bruker BioSpin GmbH |
| 3 Solvent                | CDC13               |
| 4 Temperature            | 298.7               |
| 5 Number of Scans        | 76                  |
| 6 Acquisition Time       | 1.3631              |
| 7 Acquisition Date       | 2020-12-22T15:49:11 |
| 8 Spectrometer Frequency | 100.59              |
| 9 Spectral Width         | 24038.5             |

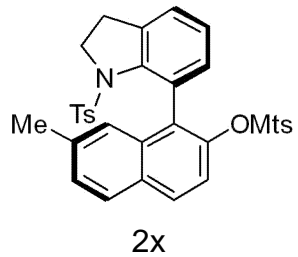

144.51  
143.29  
143.12  
141.81  
139.74  
137.47  
136.12  
135.61  
133.04  
132.50  
131.87  
131.59  
130.20  
129.40  
129.07  
128.79  
127.93  
127.85  
127.69  
127.06  
125.94  
125.39  
124.39  
118.90

77.32  
77.00  
76.68

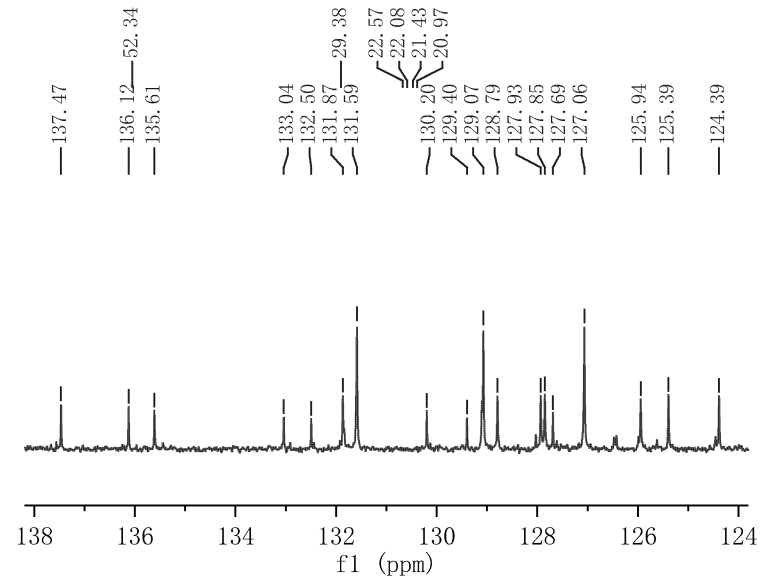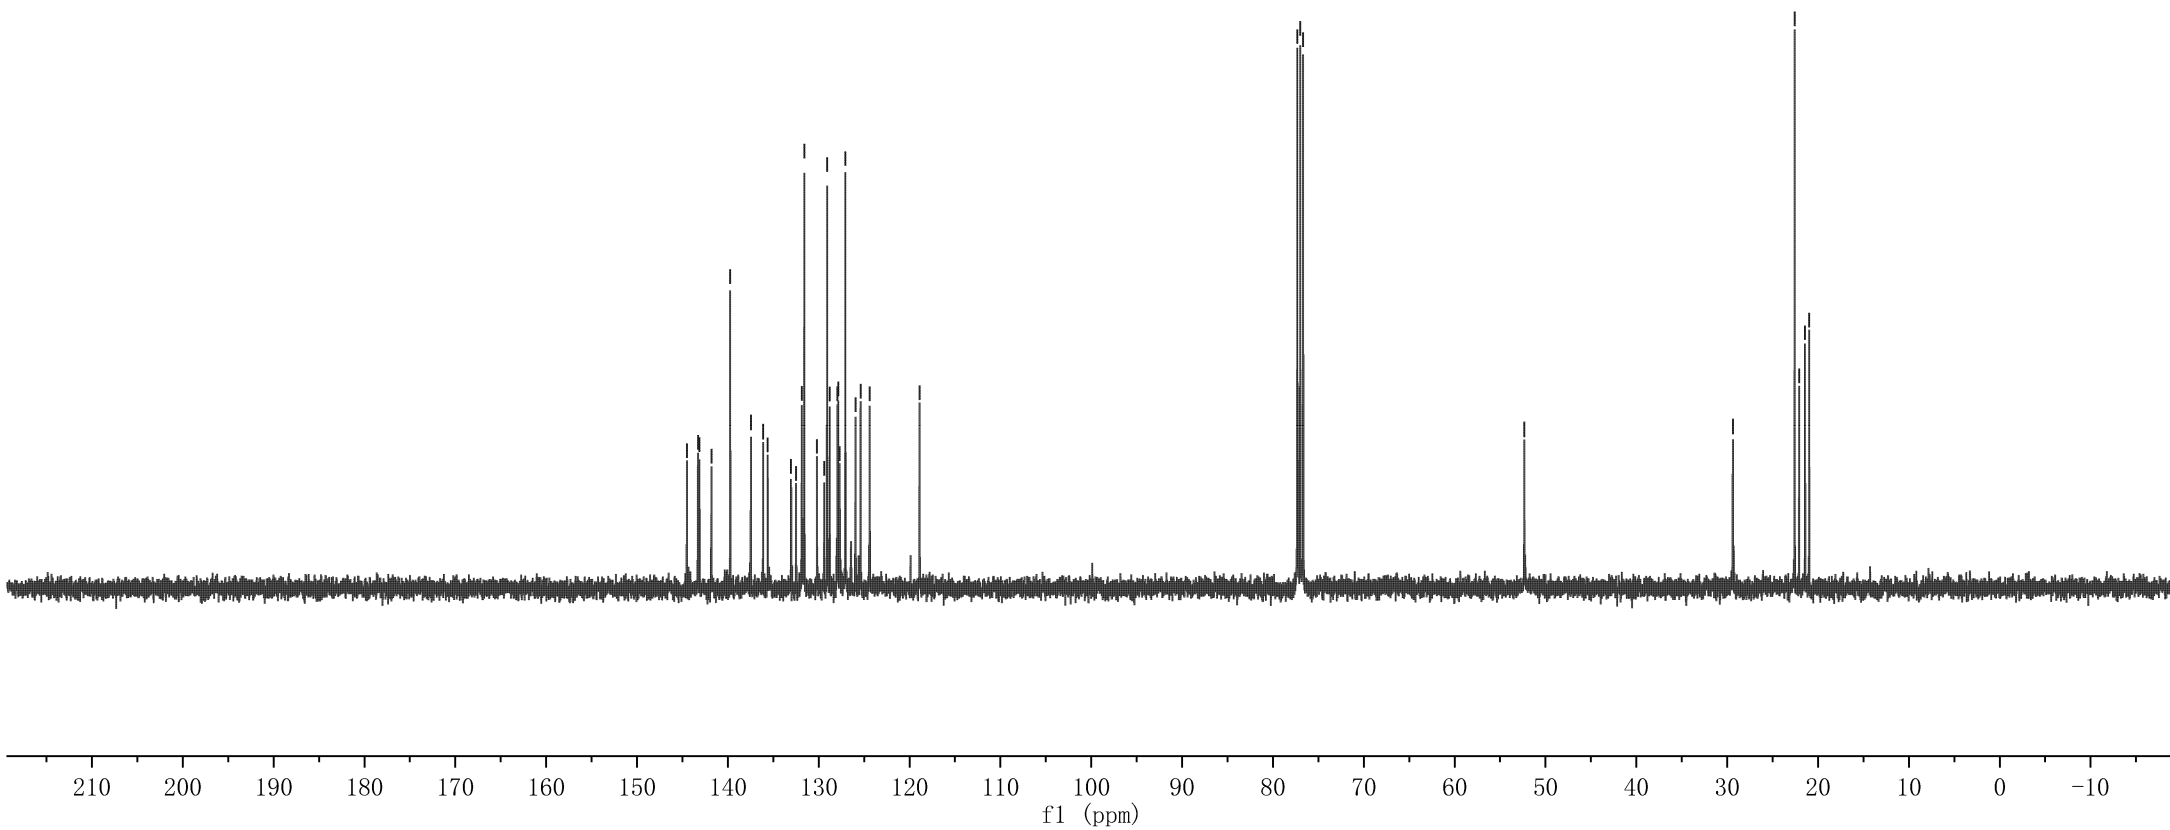



7.741  
7.719  
7.675  
7.652  
7.253  
7.232  
7.222  
7.218  
7.168  
7.150  
7.131  
7.113  
7.055  
7.025  
7.016  
6.993  
6.887

4.087  
4.055  
4.043  
4.023  
3.834  
3.814  
3.793  
3.782  
3.746

2.585  
2.528  
2.490  
2.469  
2.425  
2.328  
2.302

0.000

| Parameter                | Value               |
|--------------------------|---------------------|
| 1 Title                  | zzx-12-5-H          |
| 2 Origin                 | Bruker BioSpin GmbH |
| 3 Solvent                | CDC13               |
| 4 Temperature            | 298.0               |
| 5 Number of Scans        | 4                   |
| 6 Acquisition Time       | 4.0894              |
| 7 Acquisition Date       | 2020-12-31 09:15:03 |
| 8 Spectrometer Frequency | 400.13              |
| 9 Spectral Width         | 8012.8              |

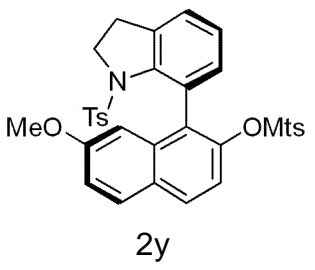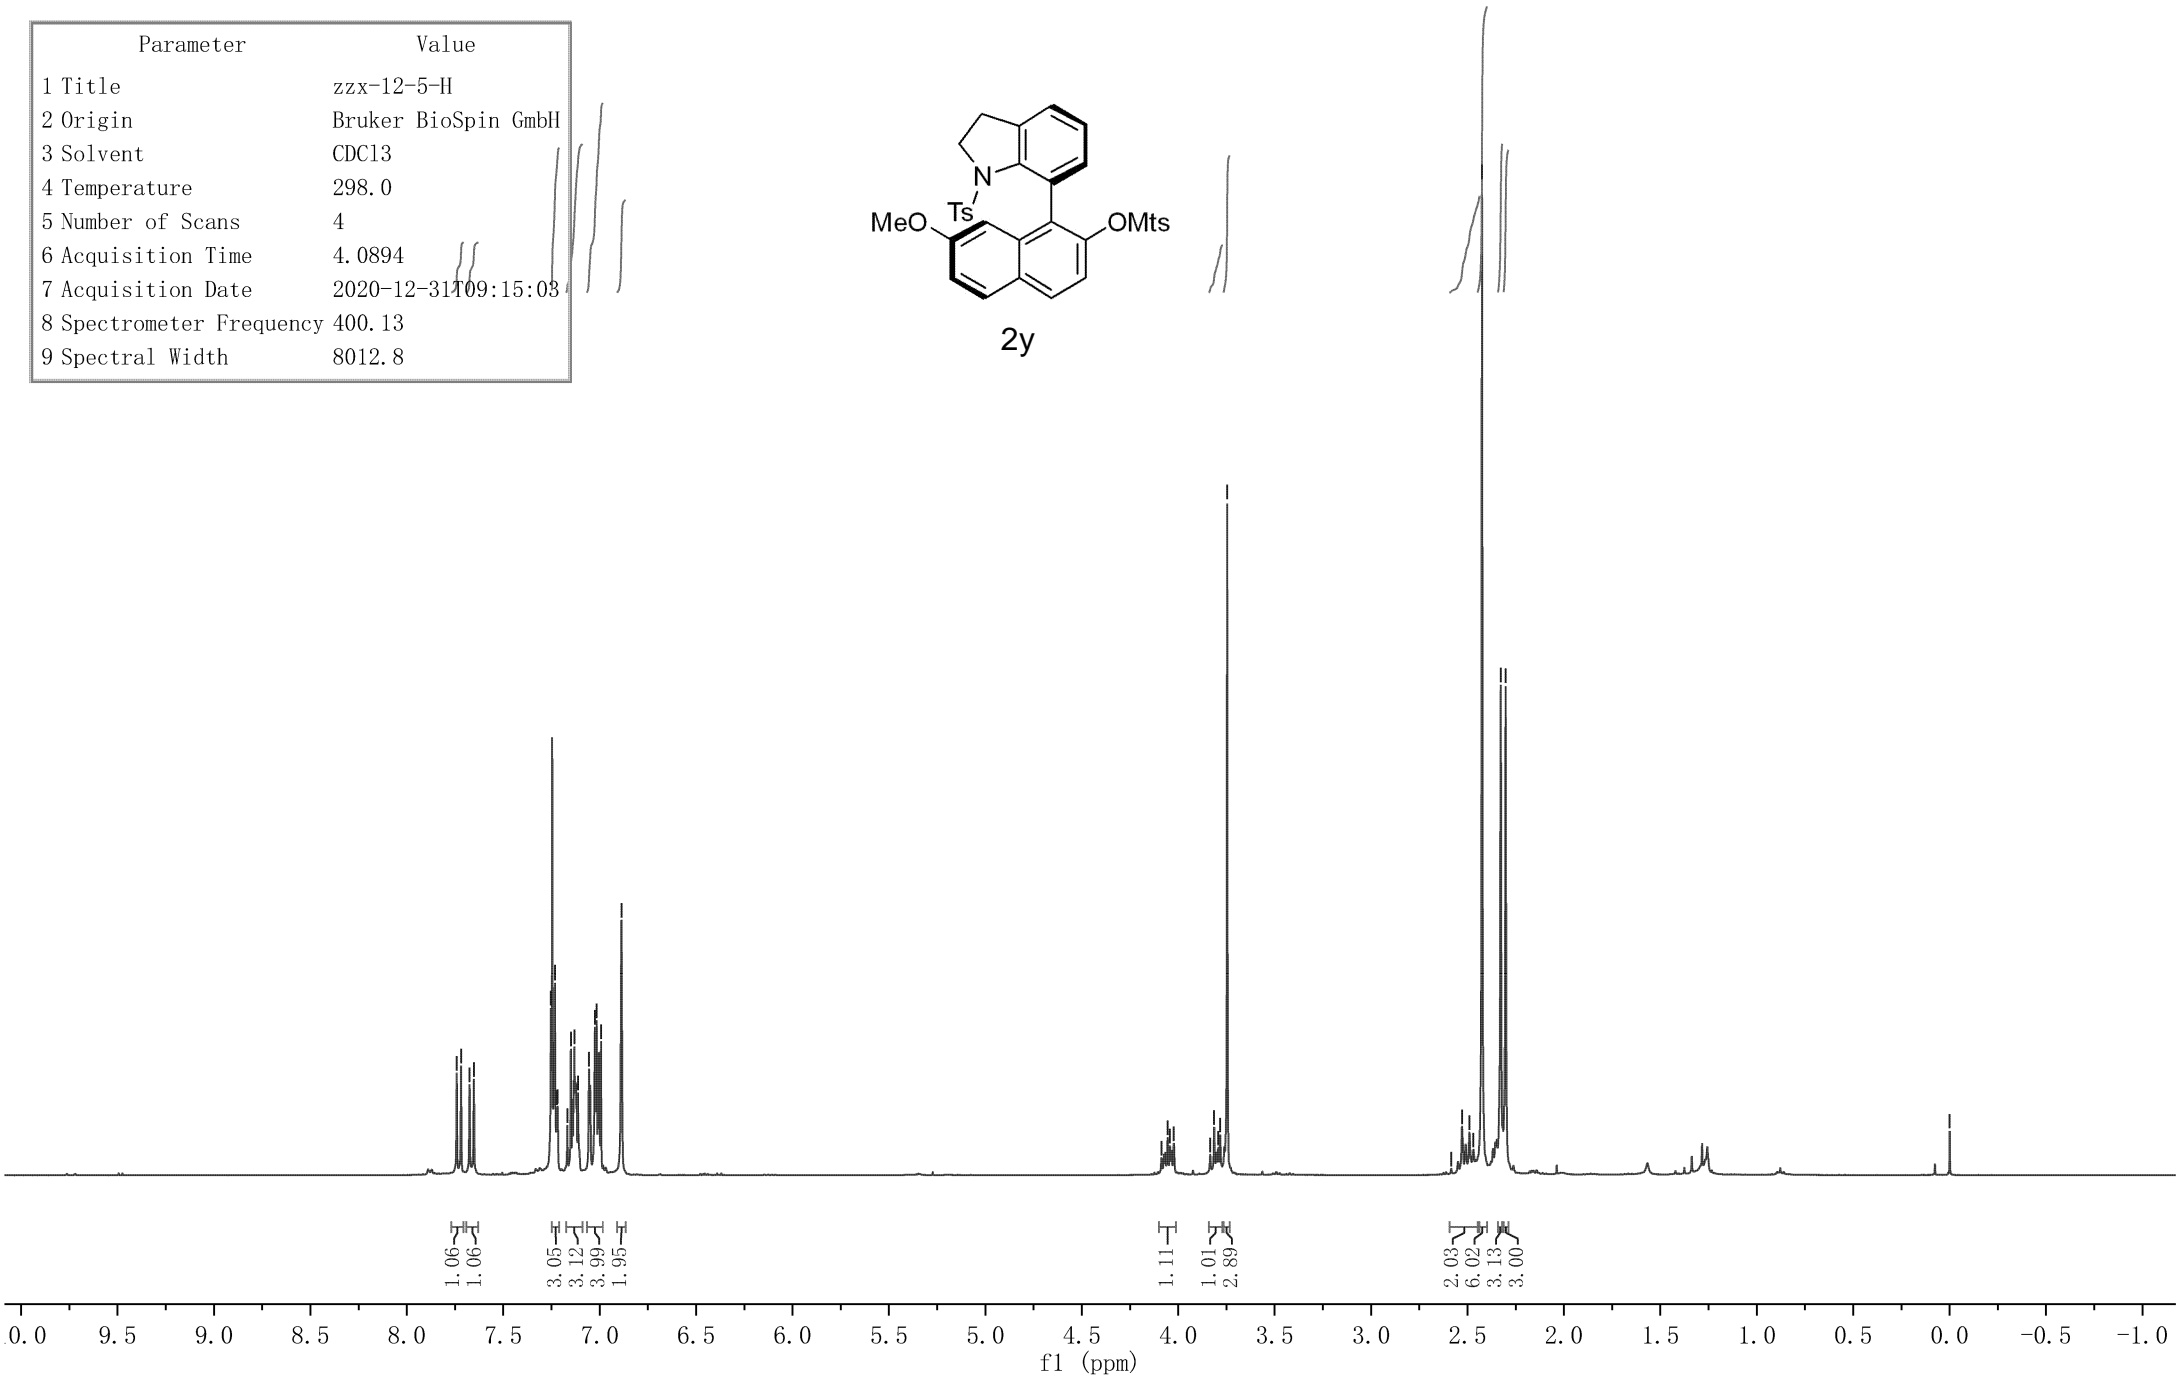

| Parameter                | Value               |
|--------------------------|---------------------|
| 1 Title                  | zzx-12-5-C          |
| 2 Origin                 | Bruker BioSpin GmbH |
| 3 Solvent                | CDC13               |
| 4 Temperature            | 300.0               |
| 5 Number of Scans        | 50                  |
| 6 Acquisition Time       | 1.3631              |
| 7 Acquisition Date       | 2020-12-31T09:16:20 |
| 8 Spectrometer Frequency | 100.61              |
| 9 Spectral Width         | 24038.5             |

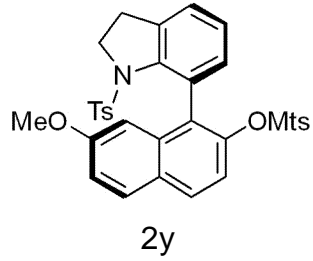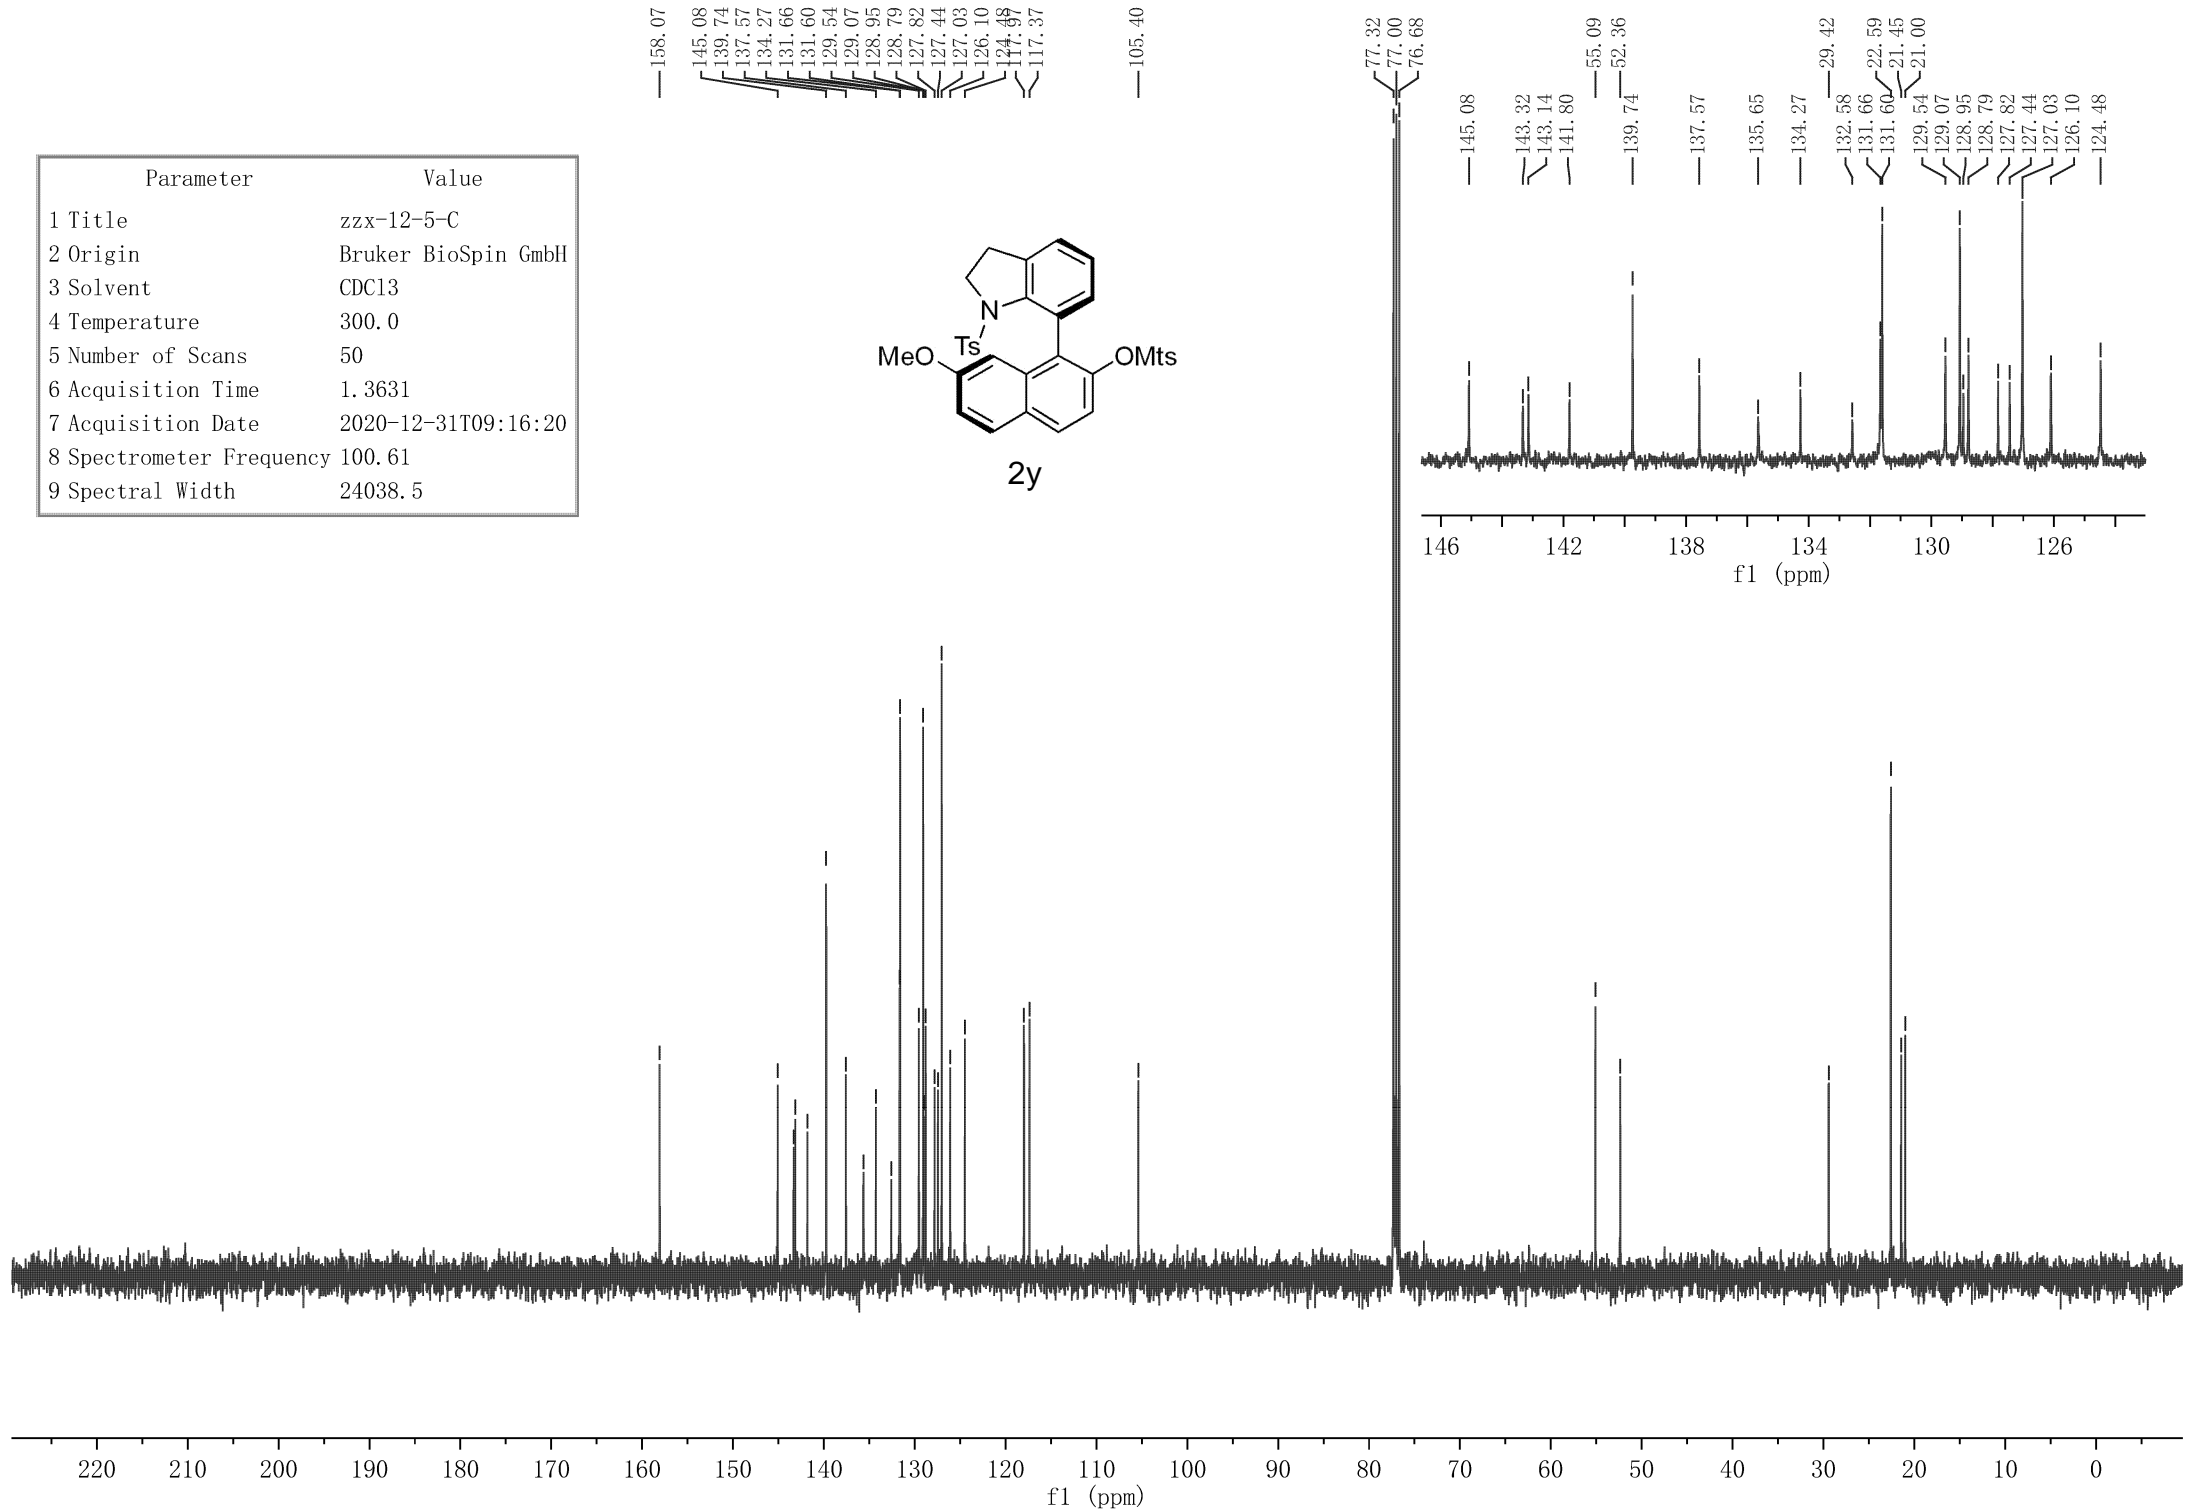

| Parameter                | Value               |
|--------------------------|---------------------|
| 1 Title                  | zzx-12-4-H          |
| 2 Origin                 | Bruker BioSpin GmbH |
| 3 Solvent                | CDC13               |
| 4 Temperature            | 298.0               |
| 5 Number of Scans        | 13                  |
| 6 Acquisition Time       | 4.0894              |
| 7 Acquisition Date       | 2020-12-28T10:12:28 |
| 8 Spectrometer Frequency | 400.13              |
| 9 Spectral Width         | 8012.8              |

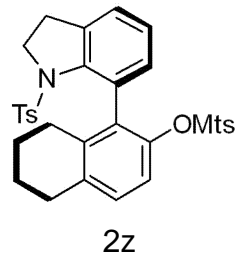

7.351  
7.330  
7.191  
7.172  
7.131  
7.112  
7.067  
7.046  
7.024  
7.022  
6.946  
6.925  
6.907  
6.668  
6.647

3.969  
3.918  
3.884  
3.835  
2.800  
2.786  
2.776  
2.762  
2.669  
2.627  
2.479  
2.455  
2.425  
2.385  
2.365  
2.352  
2.308  
2.225  
1.867  
1.749  
1.689  
1.678

— 0.000

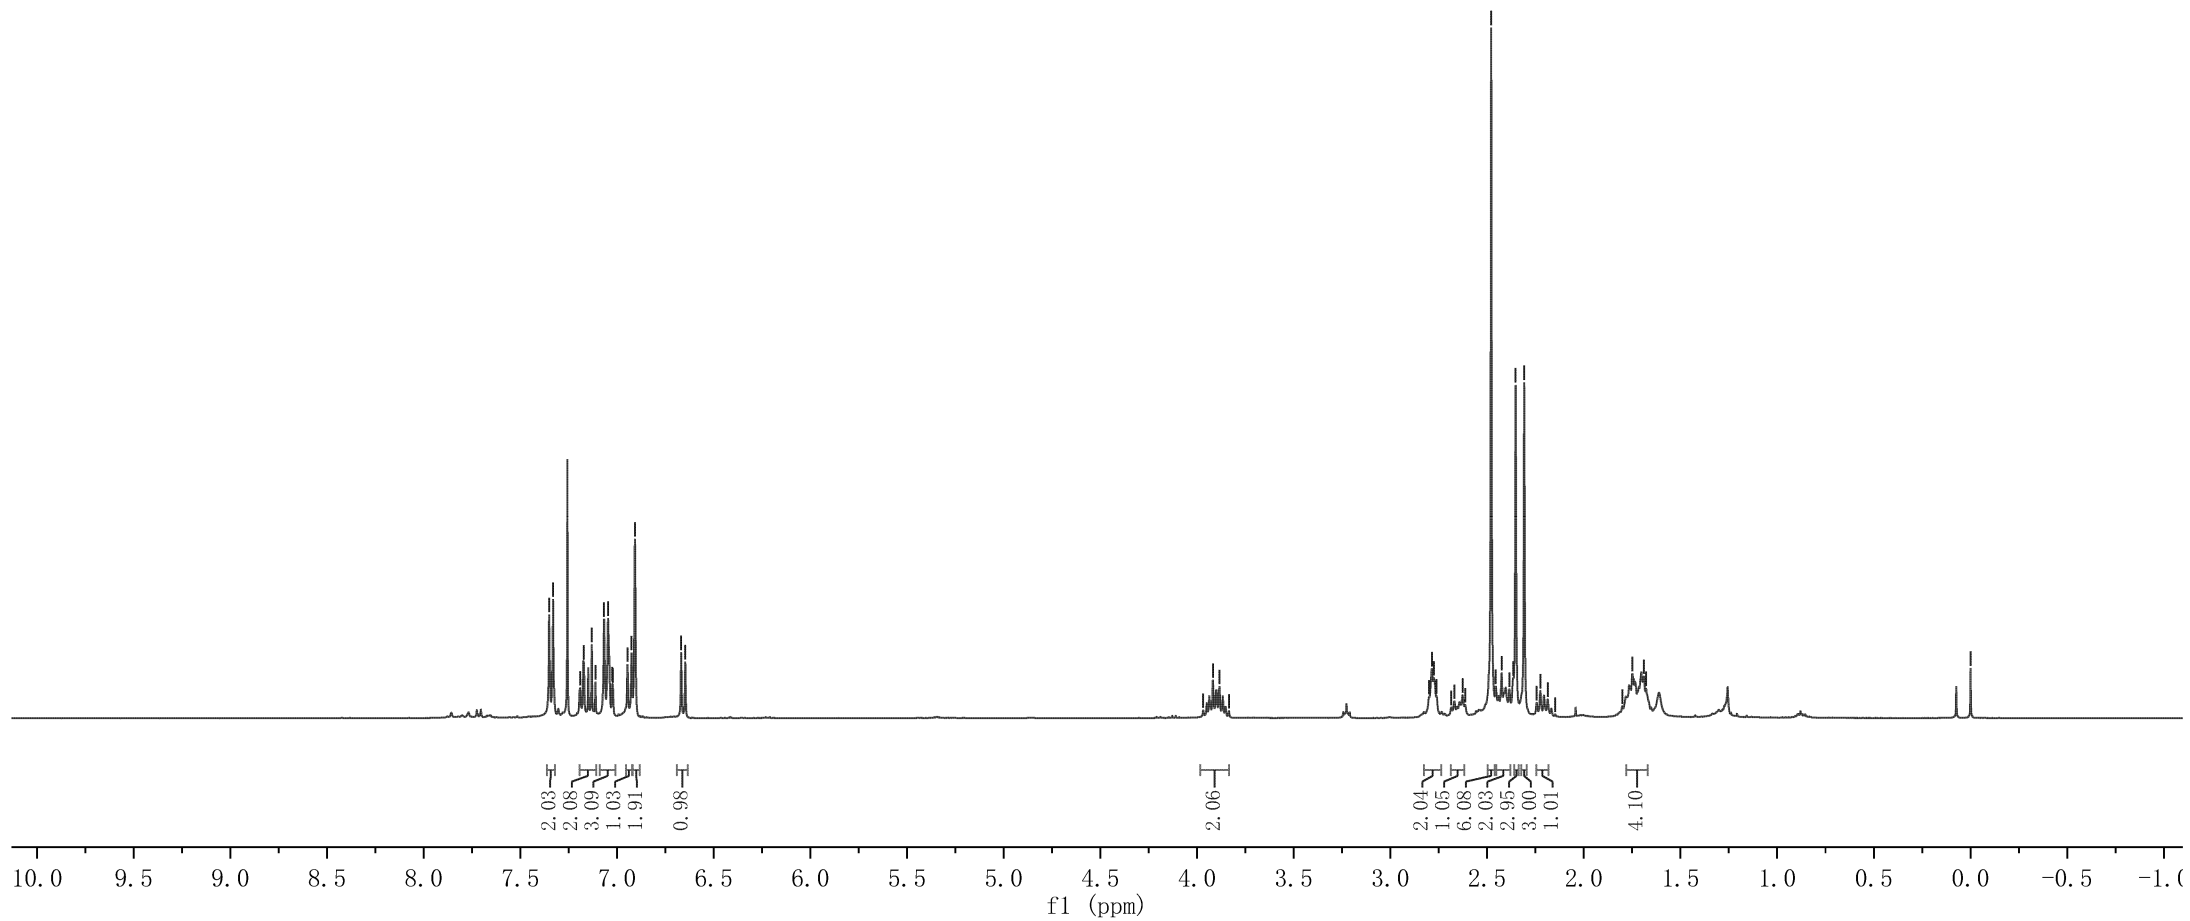

| Parameter                | Value               |
|--------------------------|---------------------|
| 1 Title                  | zzx-12-4-C          |
| 2 Origin                 | Bruker BioSpin GmbH |
| 3 Solvent                | CDC13               |
| 4 Temperature            | 300.0               |
| 5 Number of Scans        | 71                  |
| 6 Acquisition Time       | 1.3631              |
| 7 Acquisition Date       | 2020-12-28T10:15:19 |
| 8 Spectrometer Frequency | 100.61              |
| 9 Spectral Width         | 24038.5             |

145.59  
143.38  
142.97  
141.25  
139.60  
137.48  
137.34  
135.41  
133.07  
132.82  
131.57  
131.15  
129.21  
129.15  
129.09  
127.31  
126.17  
124.04  
117.12

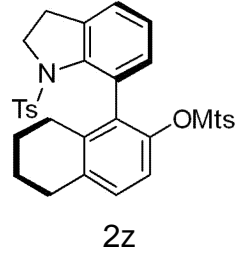

77.32  
77.00  
76.68  
143.38  
142.97  
141.25  
139.60  
52.37  
137.48  
137.34  
135.41  
29.53  
29.20  
27.79  
22.85  
22.54  
21.49  
21.00  
129.21  
129.15  
129.09  
127.31  
126.17

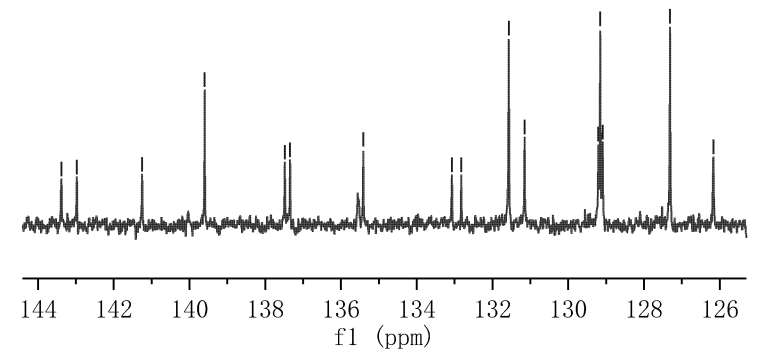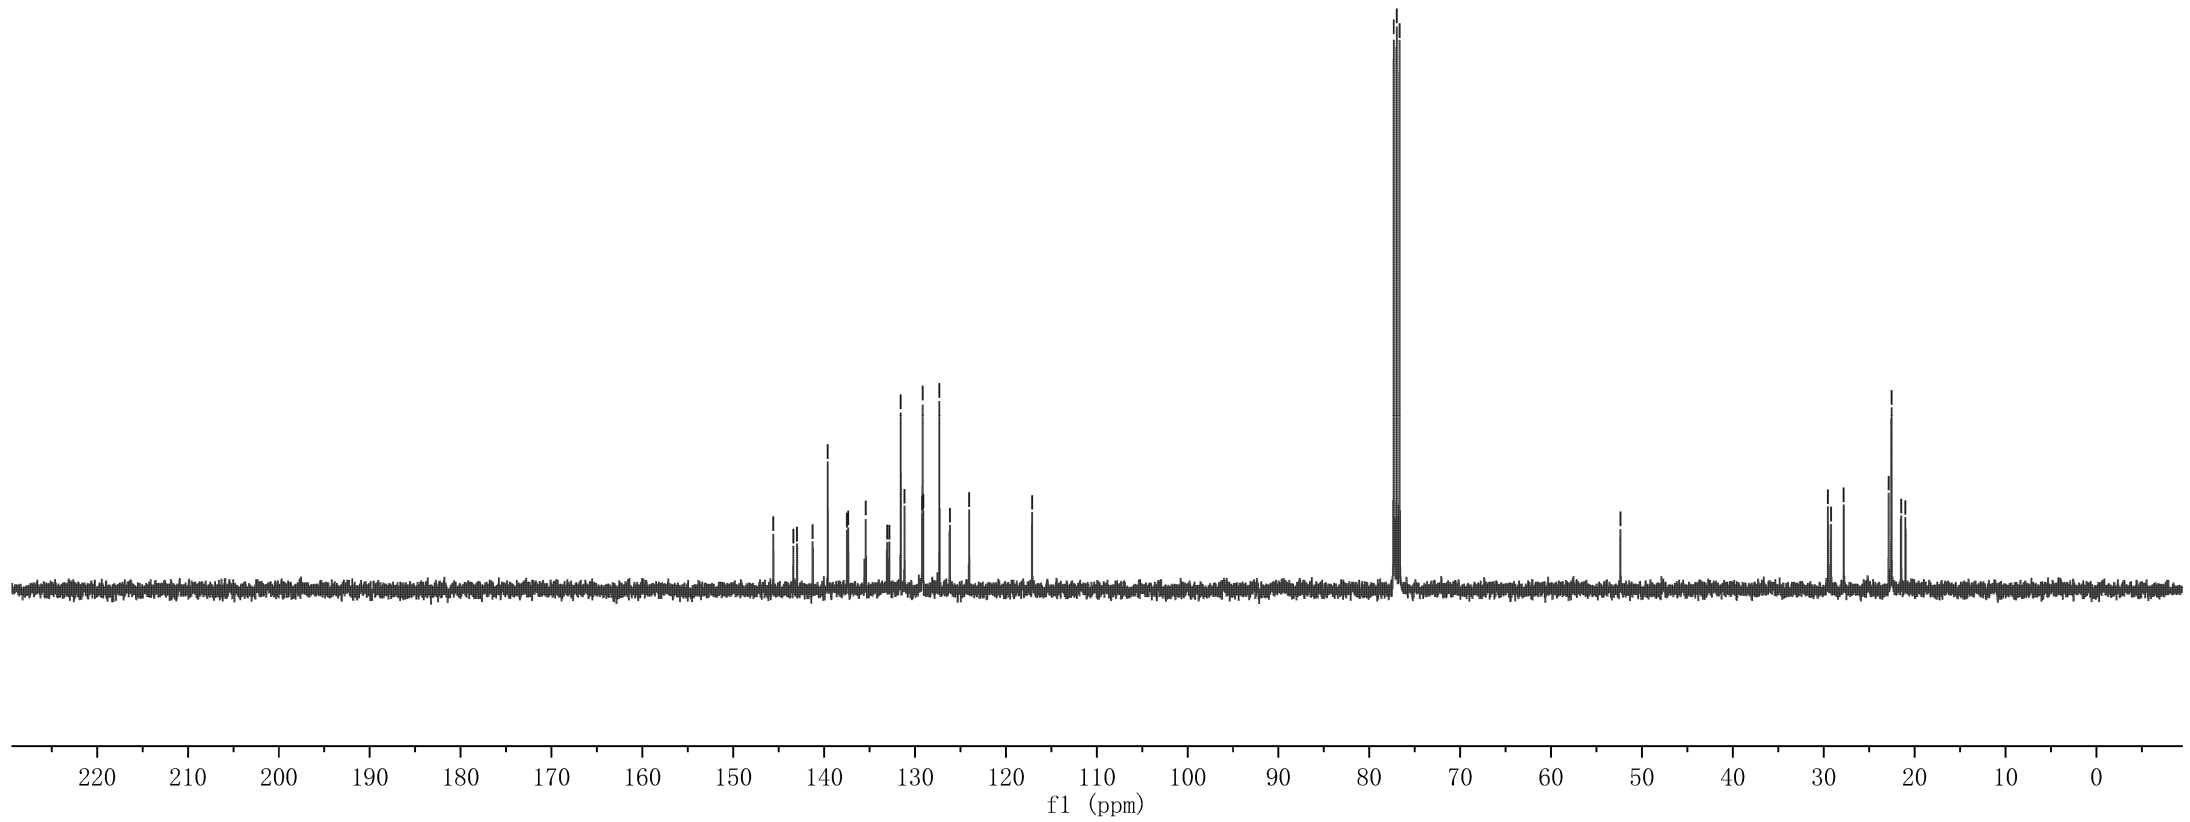

7.979  
7.970  
7.962  
7.946  
7.919  
7.913  
7.903  
7.896  
7.873  
7.571  
7.561  
7.537  
7.527  
7.364  
7.342  
7.321  
7.299  
7.279  
7.257

4.198  
4.178  
4.158  
4.138  
4.043  
4.018  
3.997  
3.966

2.562  
2.523  
2.503  
2.448  
2.385

1.291

0.000

| Parameter                | Value               |
|--------------------------|---------------------|
| 1 Title                  | zzx-14-131-H        |
| 2 Origin                 | Bruker BioSpin GmbH |
| 3 Solvent                | CDC13               |
| 4 Temperature            | 298.0               |
| 5 Number of Scans        | 11                  |
| 6 Acquisition Time       | 4.0894              |
| 7 Acquisition Date       | 2021-10-04T16:55:26 |
| 8 Spectrometer Frequency | 400.13              |
| 9 Spectral Width         | 8012.8              |

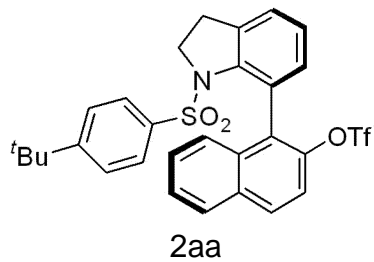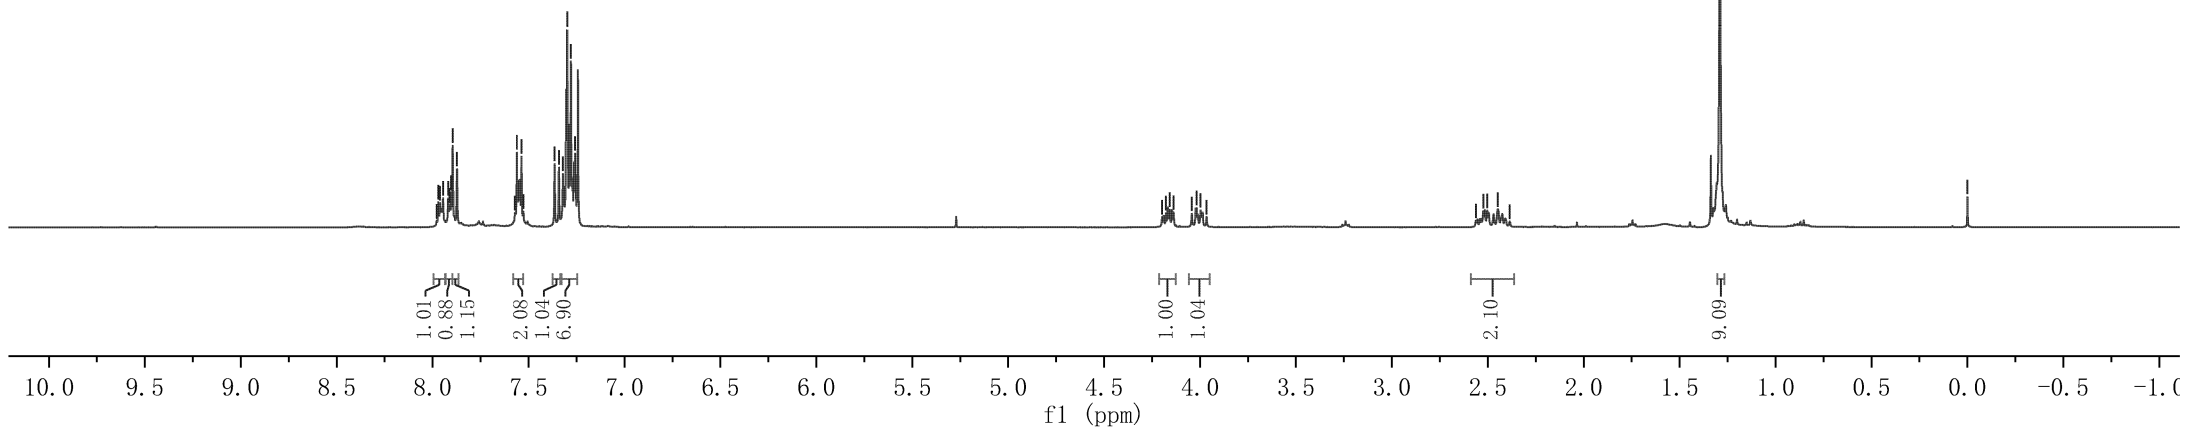

| Parameter                | Value               |
|--------------------------|---------------------|
| 1 Title                  | zzx-14-131-C        |
| 2 Origin                 | Bruker BioSpin GmbH |
| 3 Solvent                | CDC13               |
| 4 Temperature            | 300.0               |
| 5 Number of Scans        | 41                  |
| 6 Acquisition Time       | 1.3631              |
| 7 Acquisition Date       | 2021-10-04T16:56:59 |
| 8 Spectrometer Frequency | 100.61              |
| 9 Spectral Width         | 24038.5             |



156.74  
 144.05  
 142.14  
 138.32  
 135.26  
 133.16  
 132.63  
 132.00  
 130.59  
 129.97  
 128.21  
 127.19  
 126.87  
 126.59  
 126.22  
 125.61  
 125.31  
 123.16  
 119.99  
 118.88  
 116.80  
 113.61

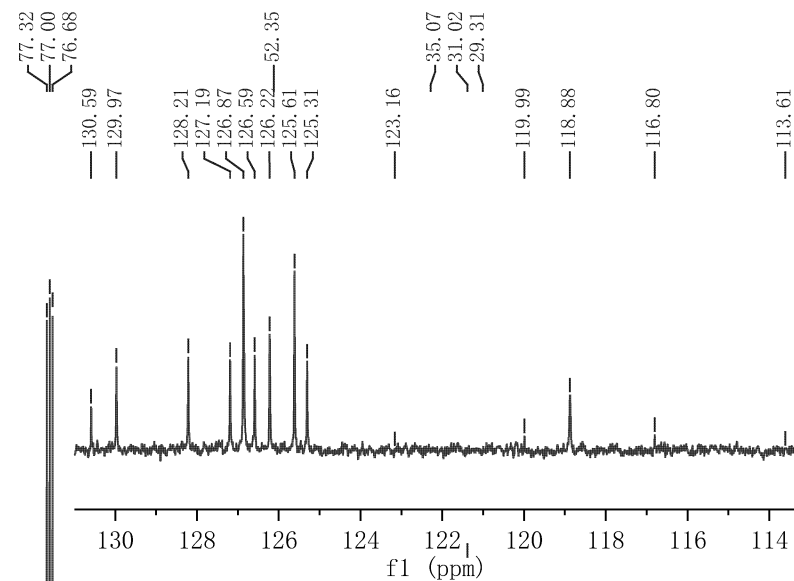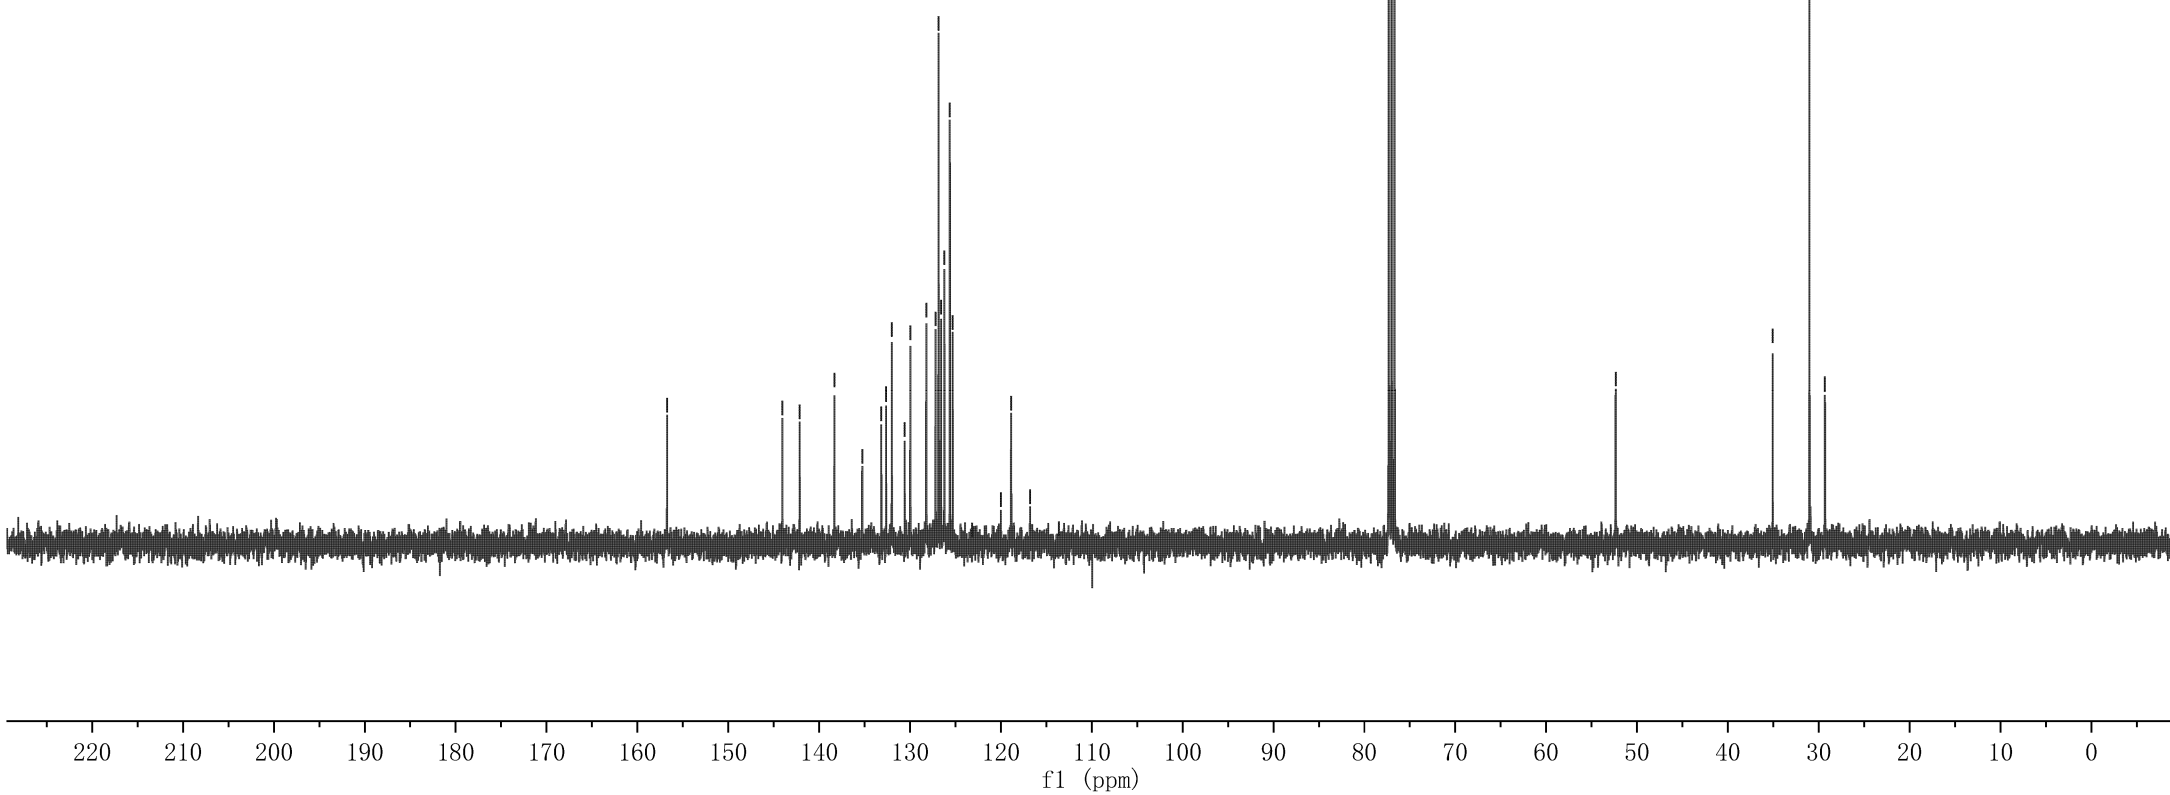

| Parameter                | Value               |
|--------------------------|---------------------|
| 1 Title                  | zzx-14-131-F        |
| 2 Origin                 | Bruker BioSpin GmbH |
| 3 Solvent                | CDCl3               |
| 4 Temperature            | 301.2               |
| 5 Number of Scans        | 16                  |
| 6 Acquisition Time       | 0.5767              |
| 7 Acquisition Date       | 2021-10-05T15:29:00 |
| 8 Spectrometer Frequency | 470.63              |
| 9 Spectral Width         | 113636.4            |

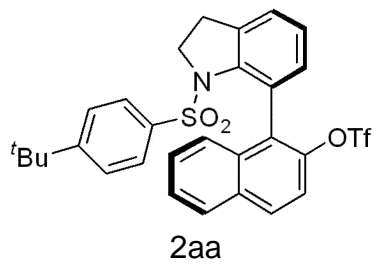

—74.48

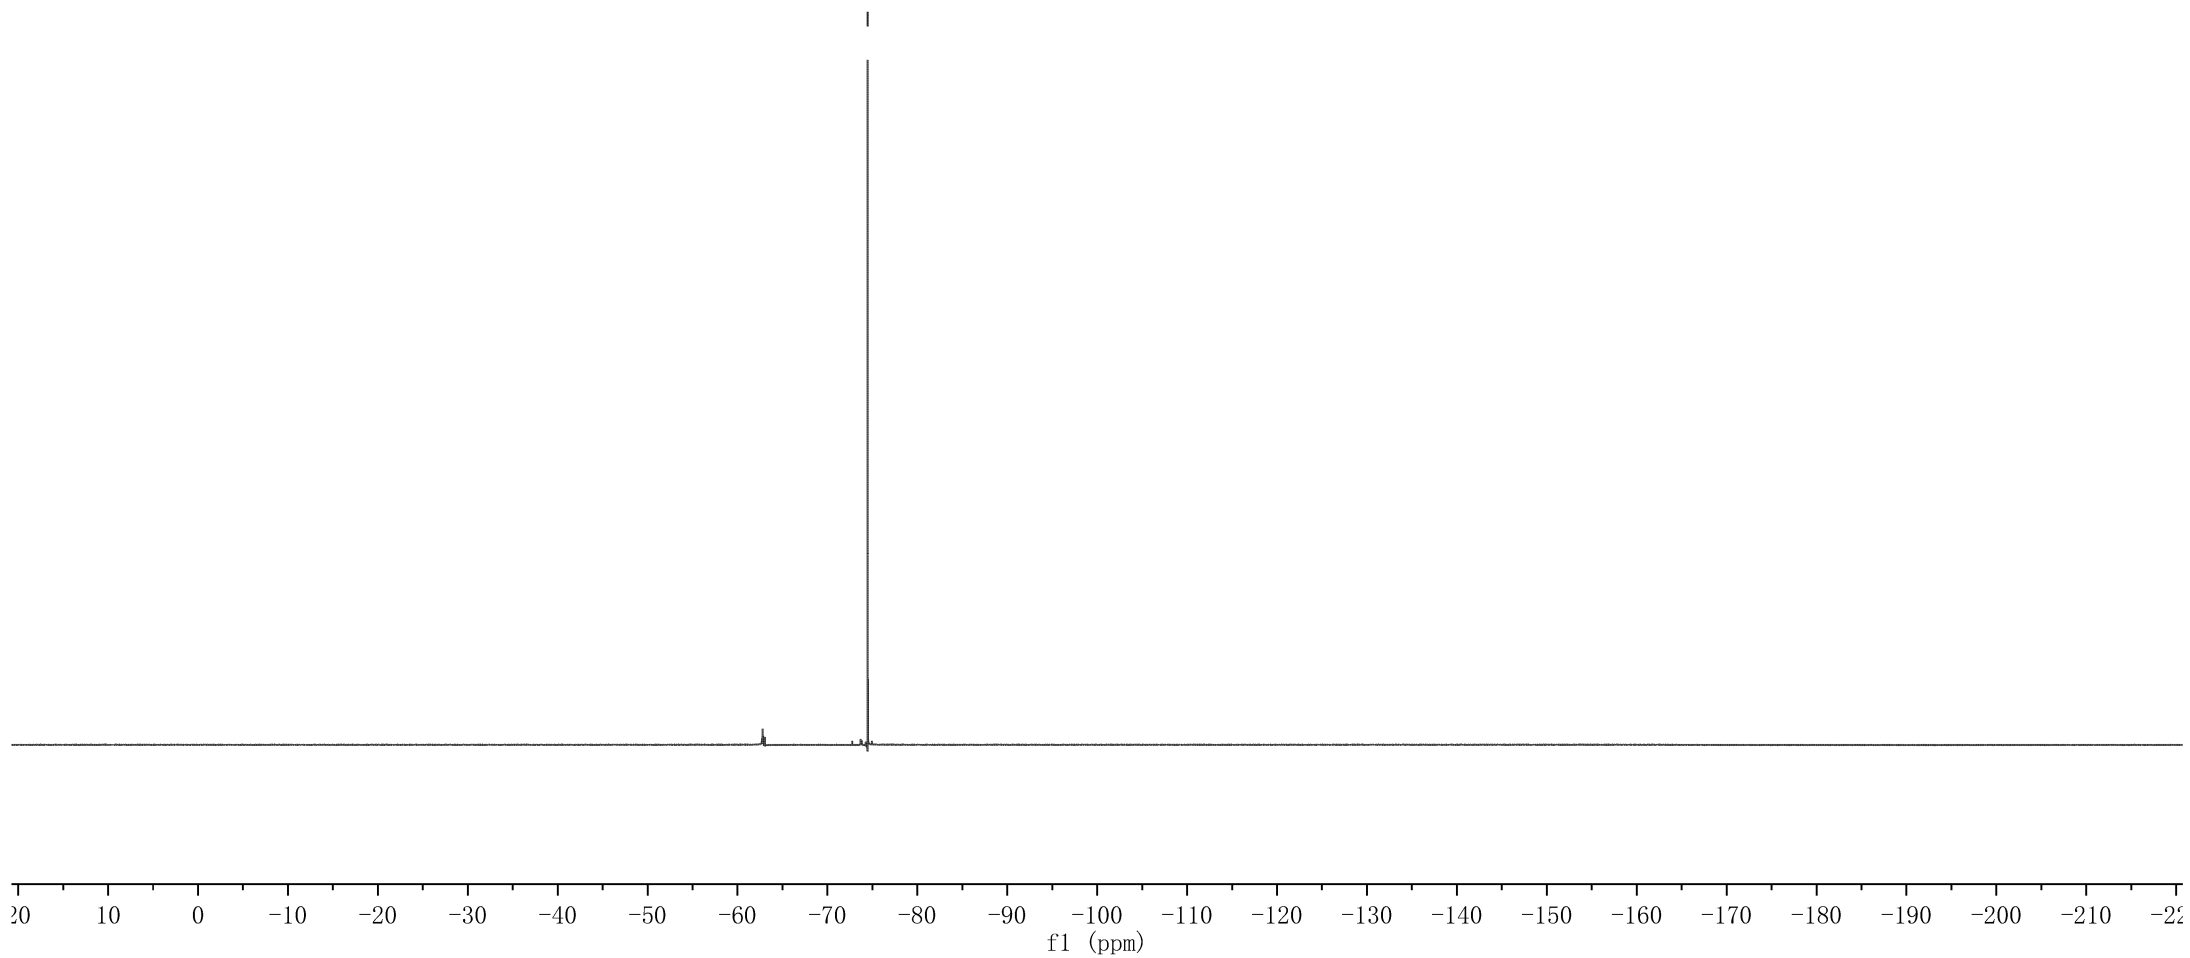

8.095  
8.090  
8.068  
8.062  
7.915  
7.891  
7.869  
7.863  
7.587  
7.580  
7.556  
7.545  
7.468  
7.463  
7.458  
7.441  
7.435  
7.360  
7.326  
7.322  
7.303

4.325  
4.295  
4.276  
4.265  
4.155  
4.124  
4.100  
4.079

2.735  
2.666  
2.648  
2.608

0.000

| Parameter                | Value               |
|--------------------------|---------------------|
| 1 Title                  | zzx-14-183-H        |
| 2 Origin                 | Bruker BioSpin GmbH |
| 3 Solvent                | CDC13               |
| 4 Temperature            | 298.0               |
| 5 Number of Scans        | 8                   |
| 6 Acquisition Time       | 4.0894              |
| 7 Acquisition Date       | 2021-11-19T09:33:35 |
| 8 Spectrometer Frequency | 400.13              |
| 9 Spectral Width         | 8012.8              |

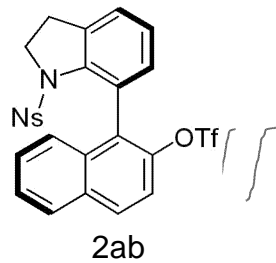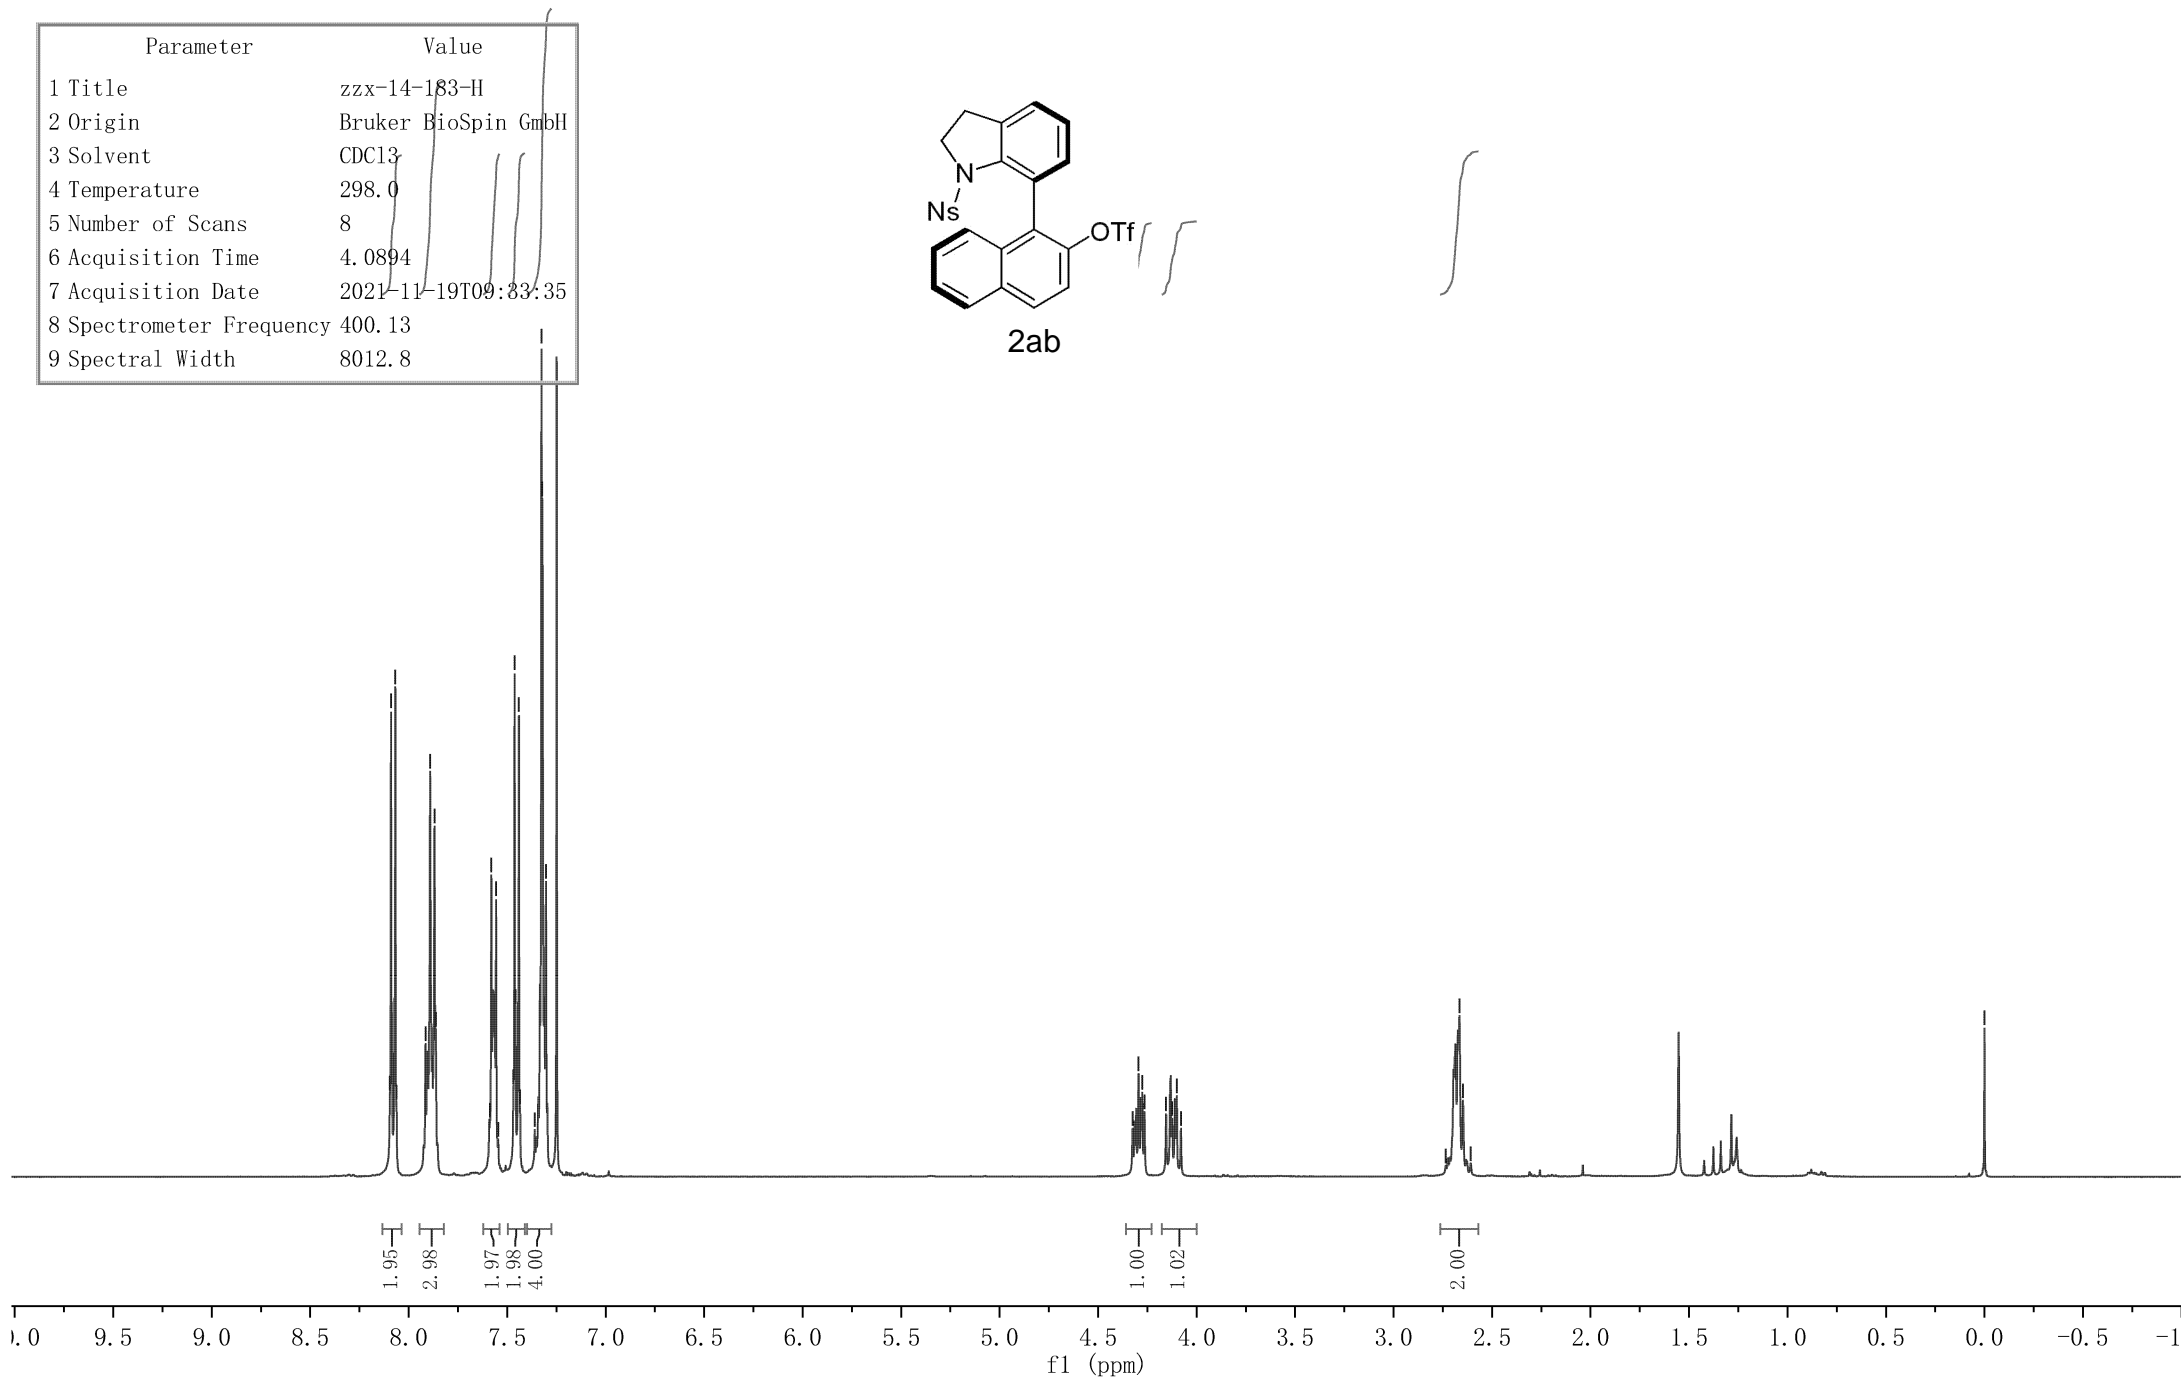



| Parameter                | Value               |
|--------------------------|---------------------|
| 1 Title                  | zzx-14-183-C        |
| 2 Origin                 | Bruker BioSpin GmbH |
| 3 Solvent                | CDC13               |
| 4 Temperature            | 300.0               |
| 5 Number of Scans        | 56                  |
| 6 Acquisition Time       | 1.3631              |
| 7 Acquisition Date       | 2021-11-19T09:35:12 |
| 8 Spectrometer Frequency | 100.61              |
| 9 Spectral Width         | 24038.5             |

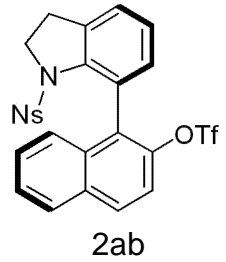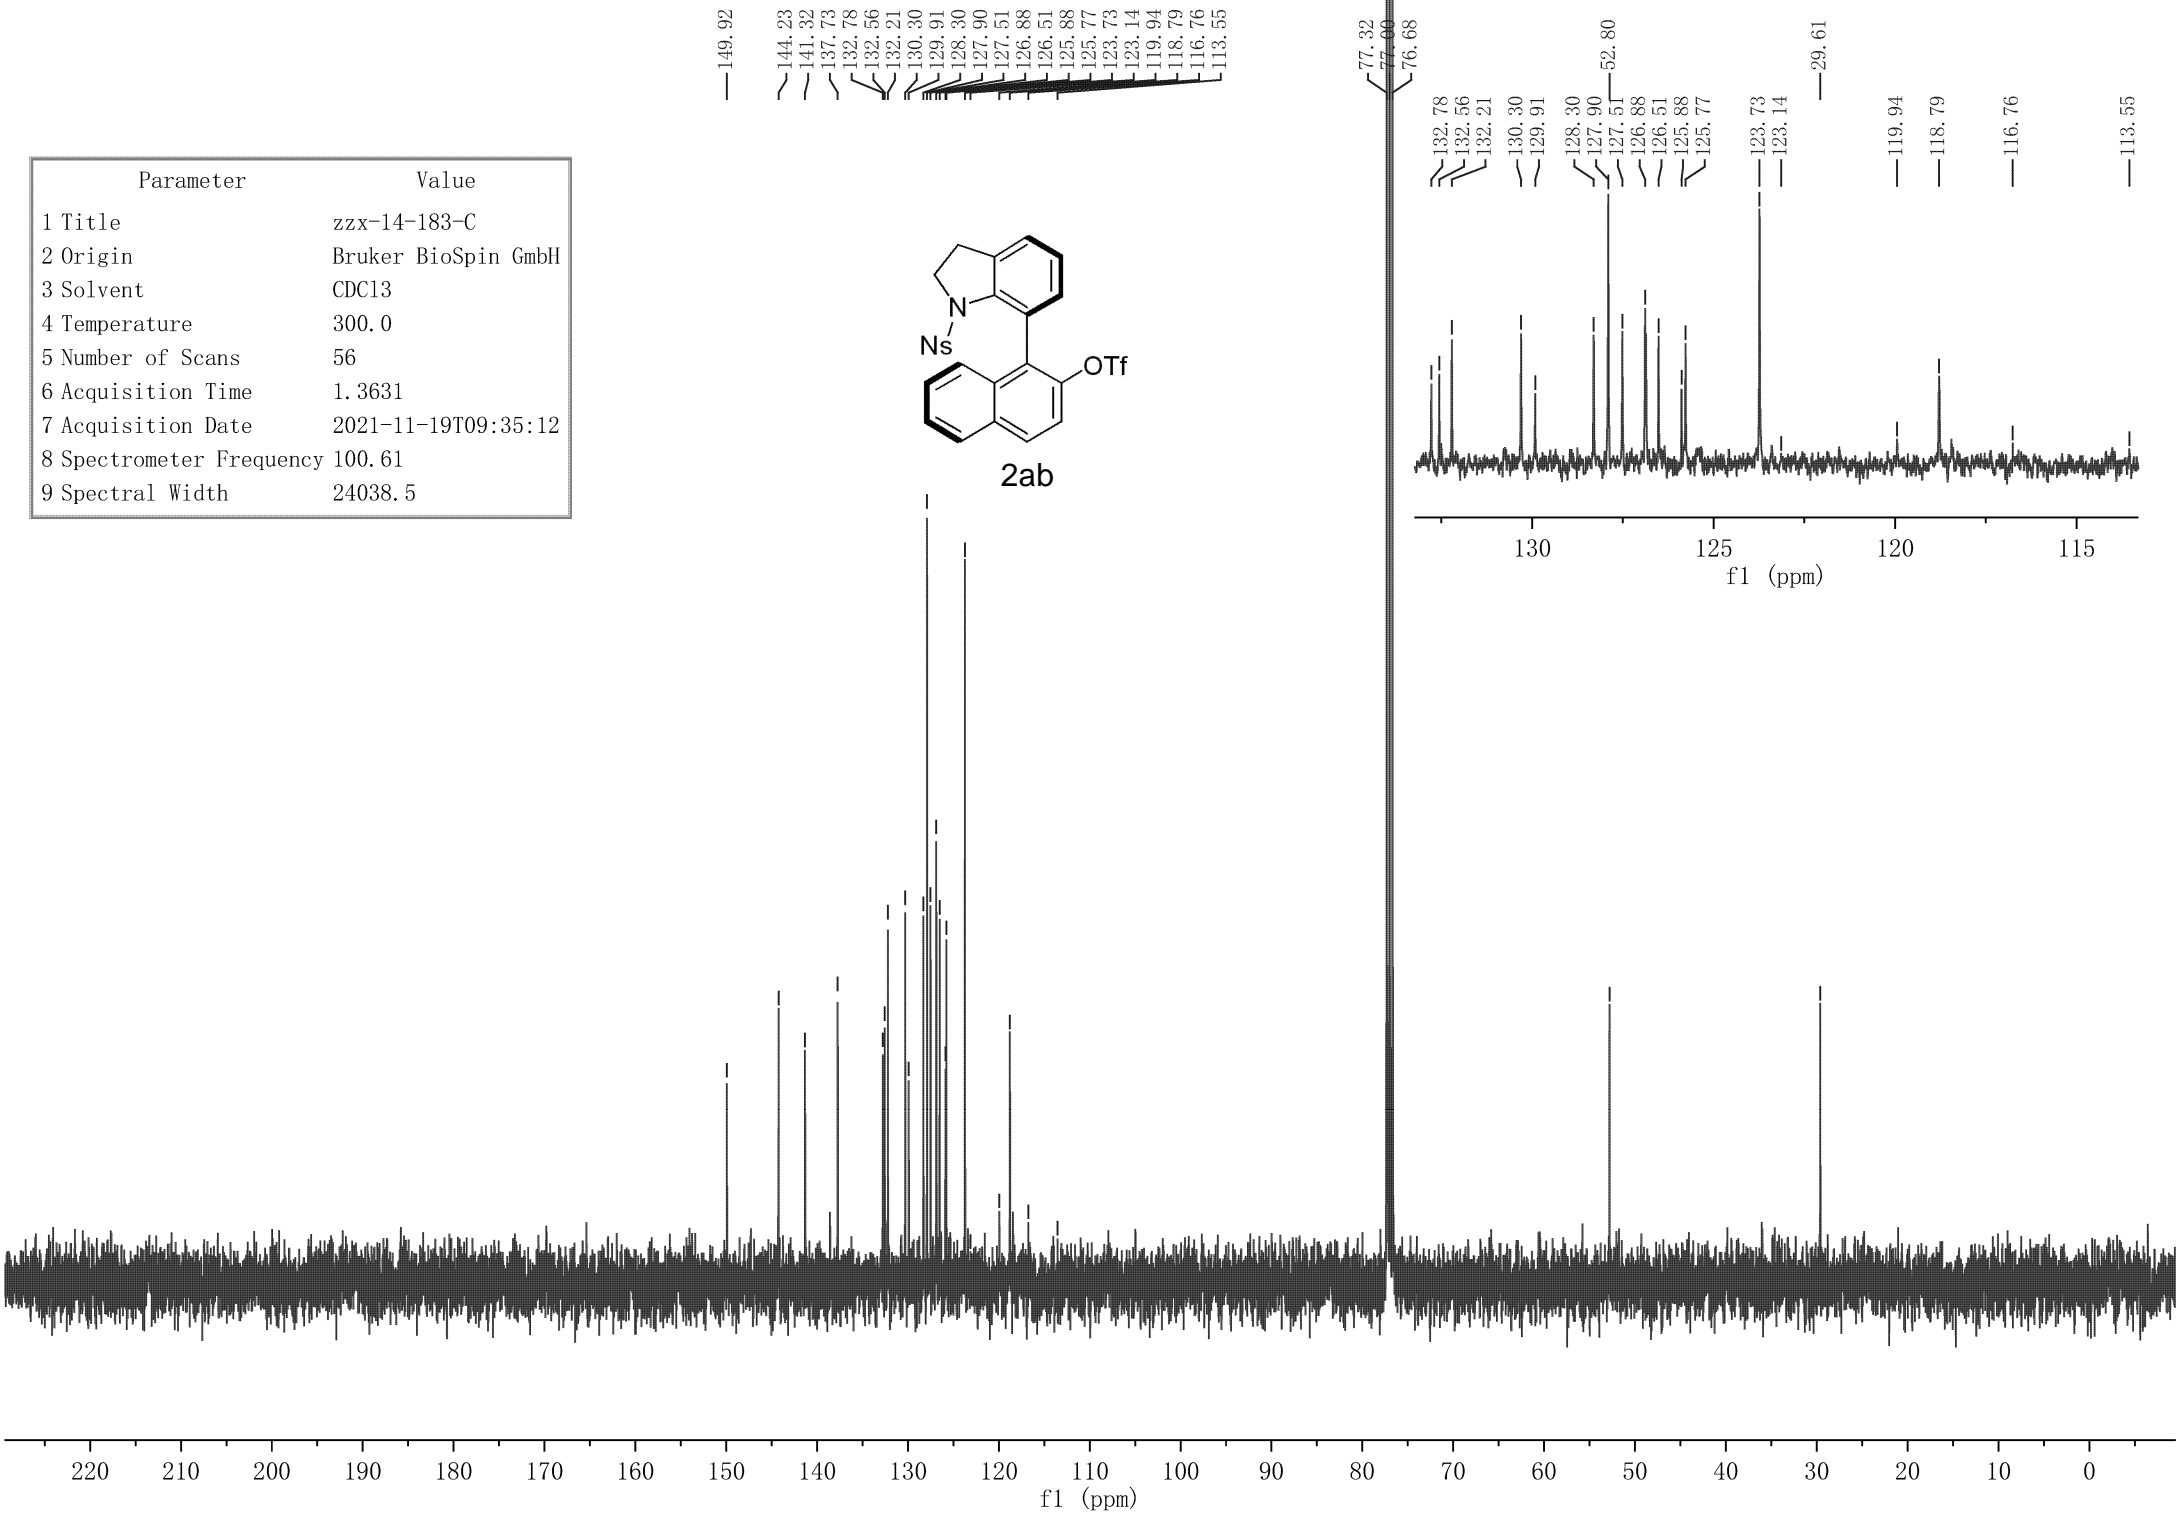

| Parameter                | Value               |
|--------------------------|---------------------|
| 1 Title                  | zzx-14-183-F        |
| 2 Origin                 | Bruker BioSpin GmbH |
| 3 Solvent                | CDCl3               |
| 4 Temperature            | 295.3               |
| 5 Number of Scans        | 12                  |
| 6 Acquisition Time       | 0.7340              |
| 7 Acquisition Date       | 2021-11-27T10:23:45 |
| 8 Spectrometer Frequency | 376.31              |
| 9 Spectral Width         | 89285.7             |

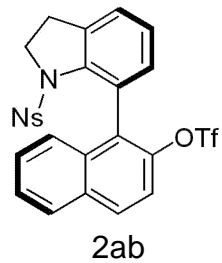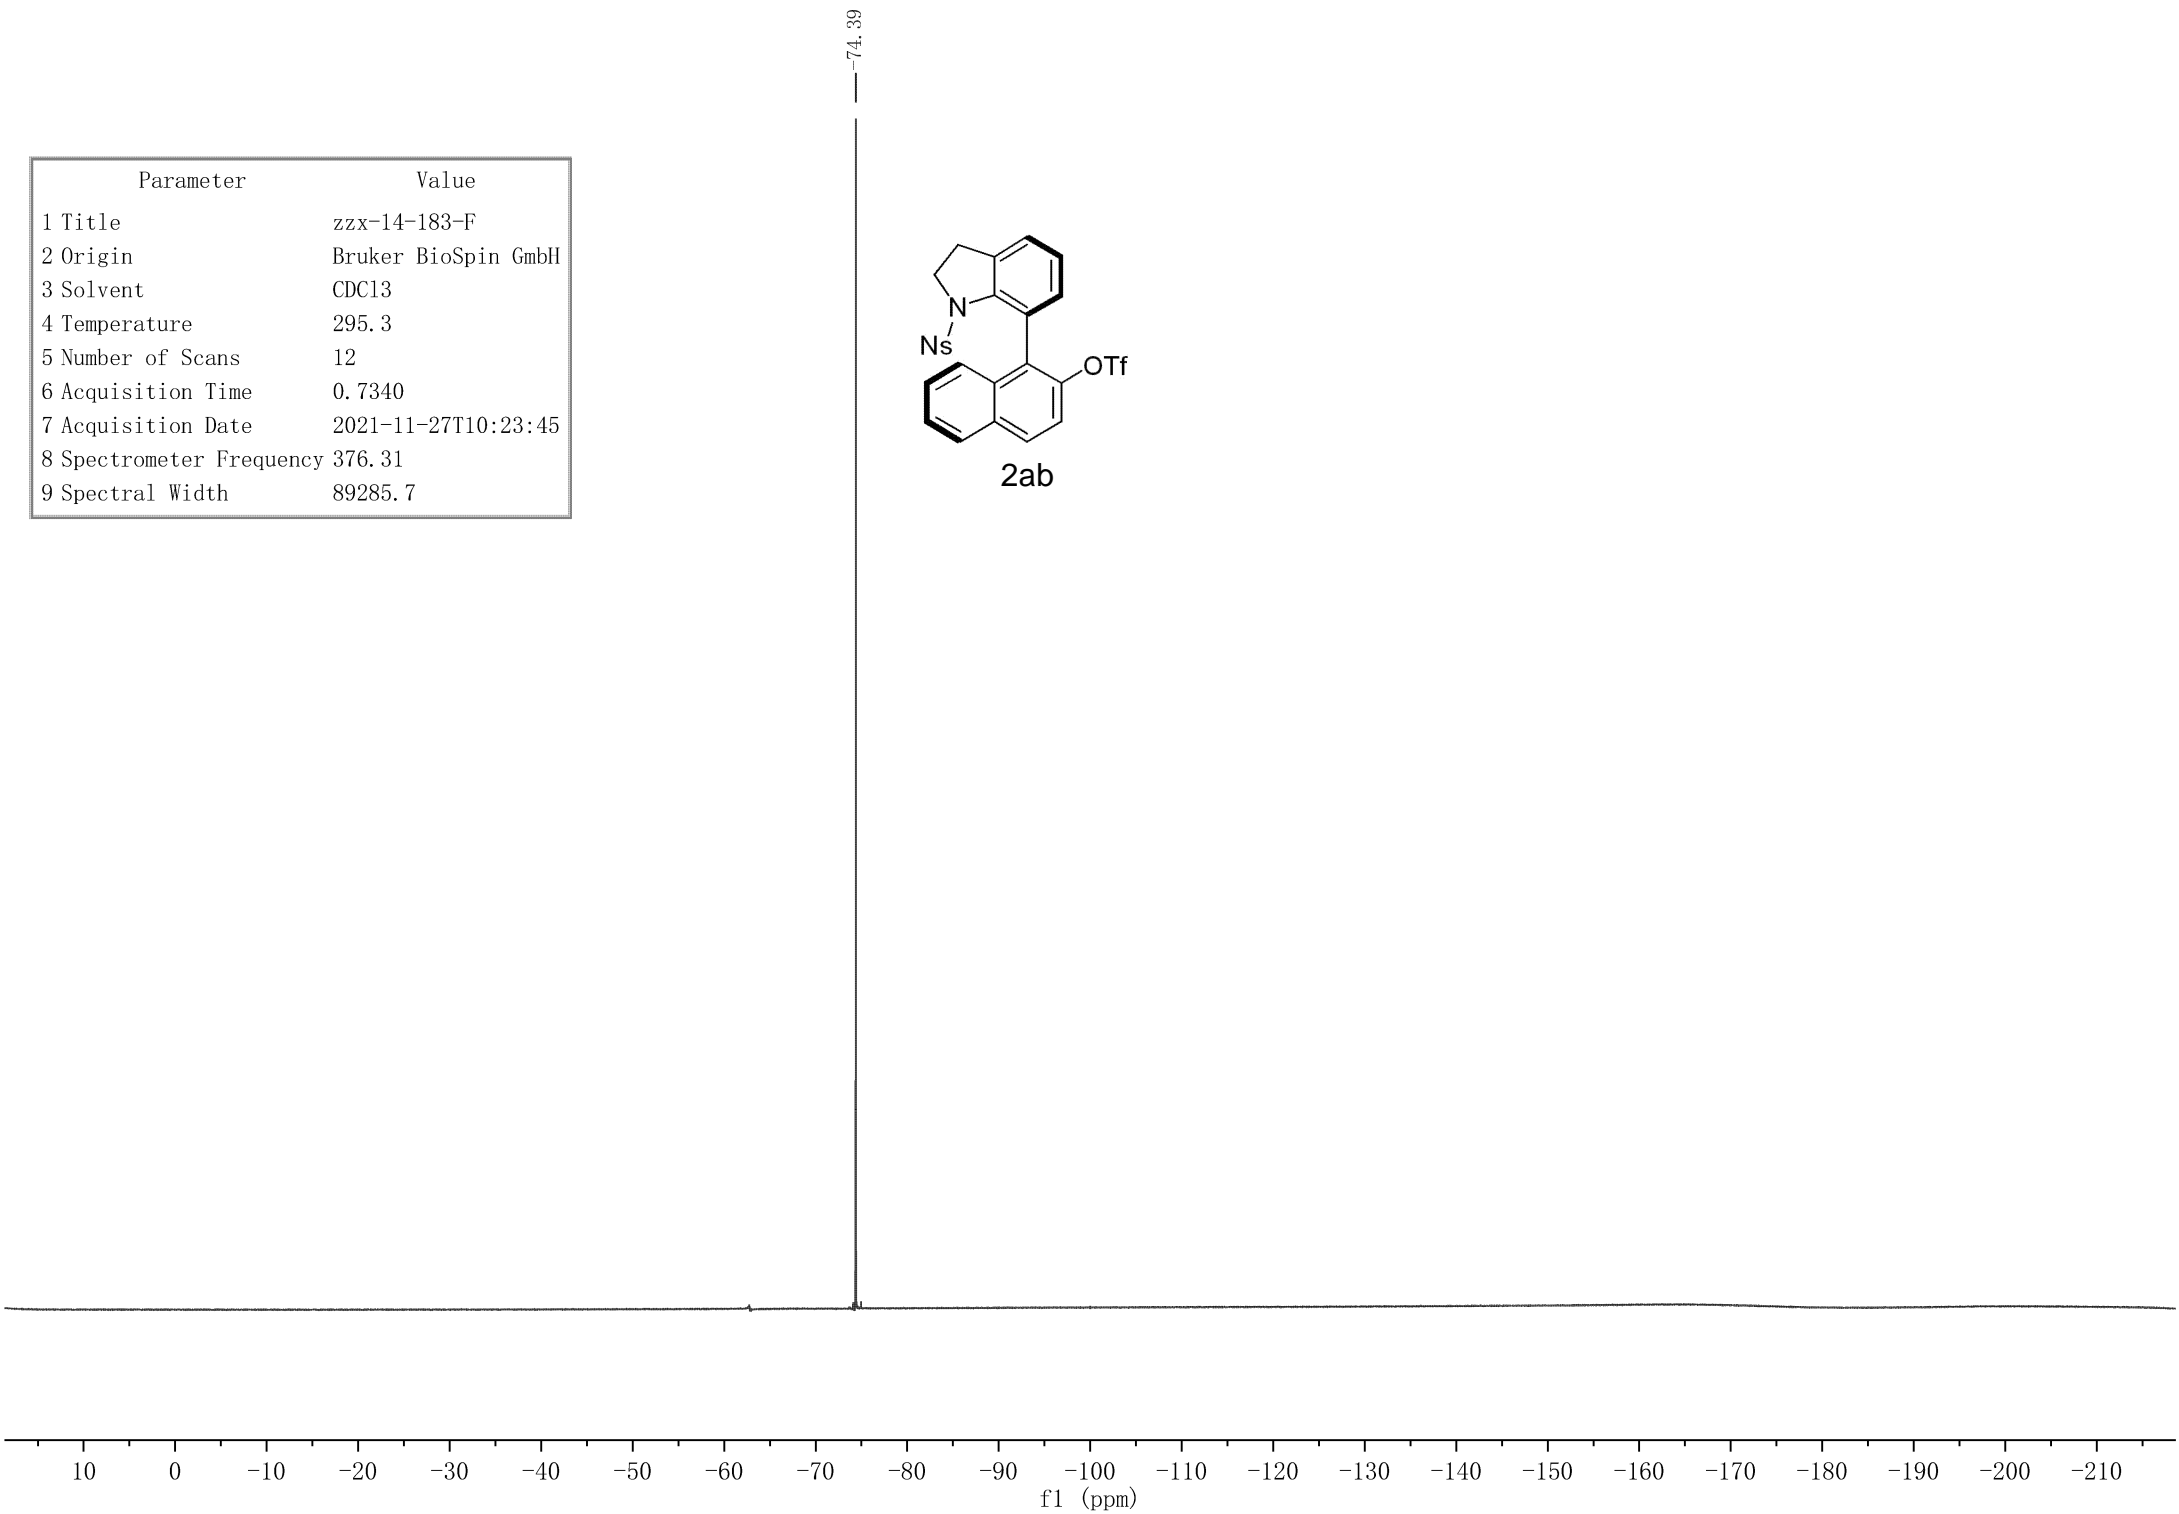

7.909  
7.886  
7.784  
7.764  
7.446  
7.428  
7.408  
7.361  
7.352  
7.340  
7.317  
7.274  
7.266  
7.252  
7.240  
7.221  
7.215  
7.207

4.094  
4.030  
4.011  
3.960

2.658  
2.618  
2.599  
2.578  
2.517  
2.498  
2.483  
2.445  
2.377  
2.268

0.000

| Parameter                | Value               |
|--------------------------|---------------------|
| 1 Title                  | zzx-18-8-Me-OTf     |
| 2 Origin                 | Bruker BioSpin GmbH |
| 3 Solvent                | CDC13               |
| 4 Temperature            | 298.0               |
| 5 Number of Scans        | 9                   |
| 6 Acquisition Time       | 4.0894              |
| 7 Acquisition Date       | 2023-02-24T10:07:41 |
| 8 Spectrometer Frequency | 400.13              |
| 9 Spectral Width         | 8012.8              |

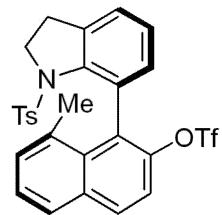

2ac

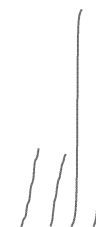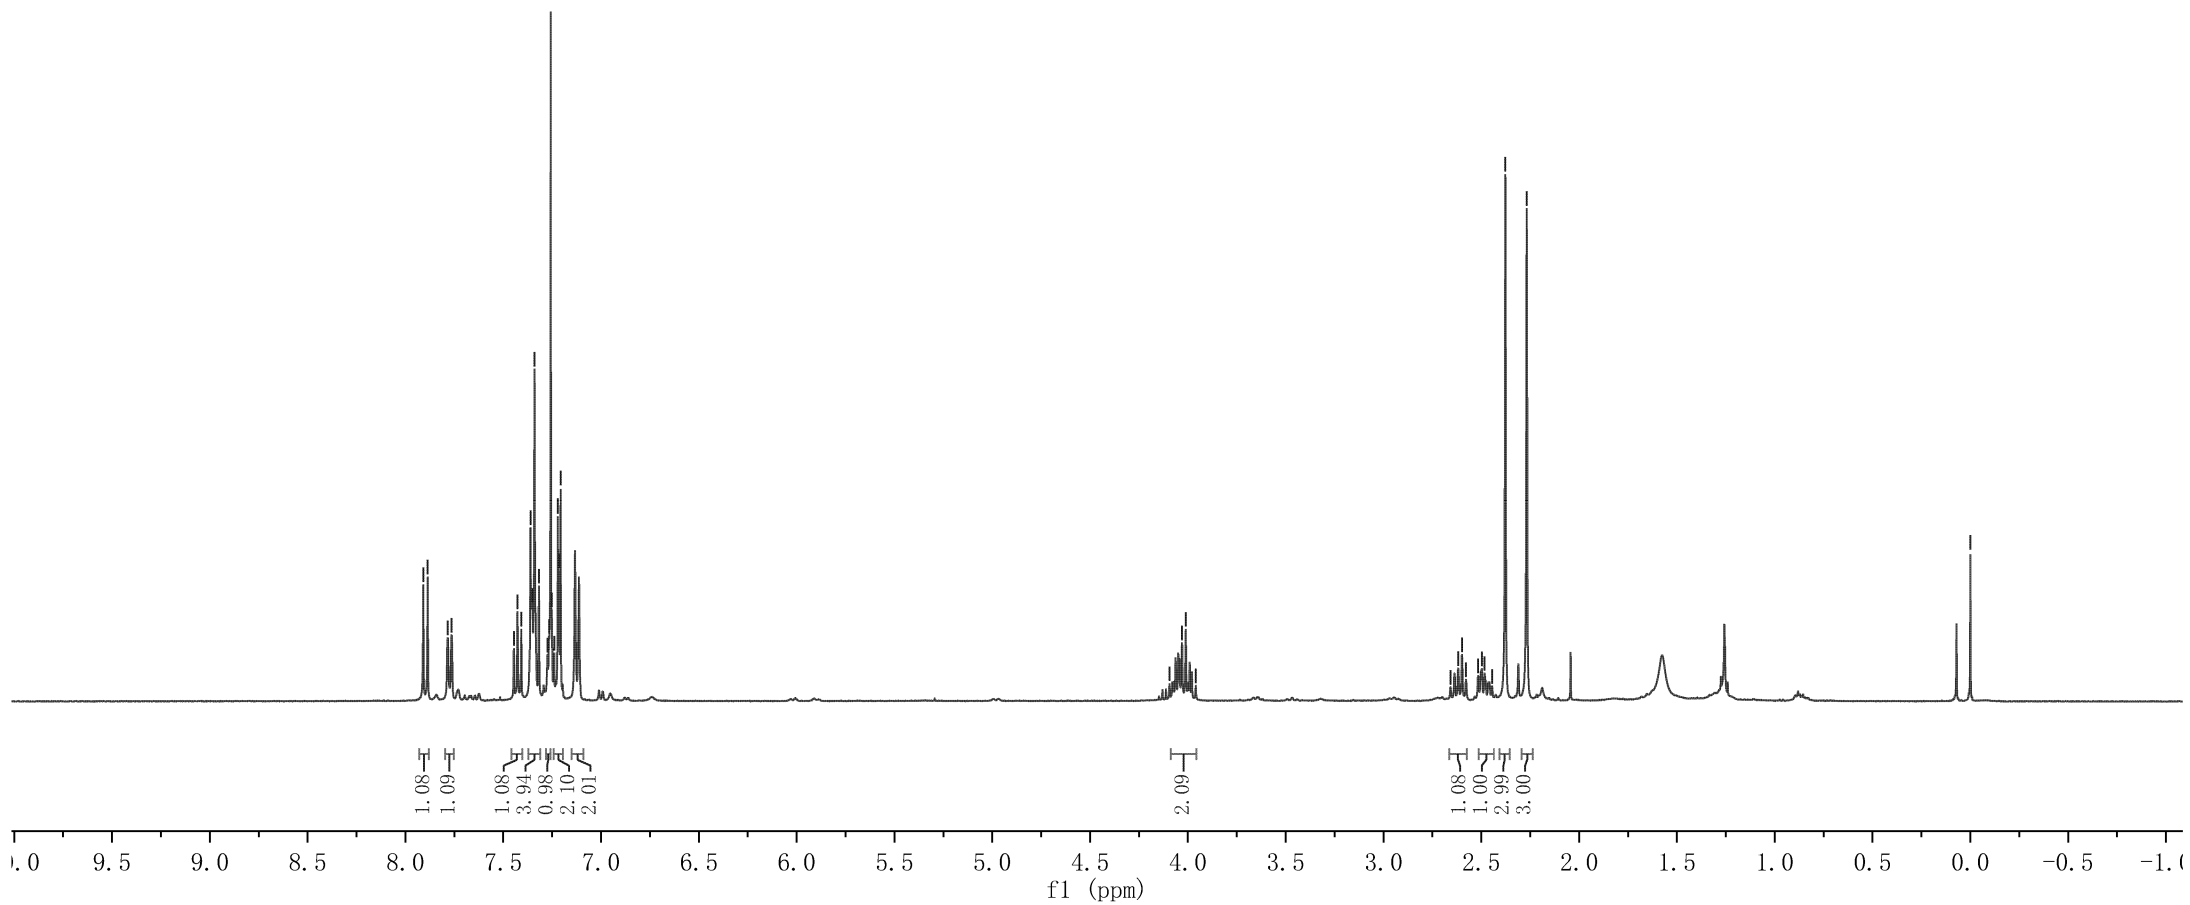

| Parameter                | Value               |
|--------------------------|---------------------|
| 1 Title                  | zzx-12-225-C        |
| 2 Origin                 | Bruker BioSpin GmbH |
| 3 Solvent                | CDC13               |
| 4 Temperature            | 300.0               |
| 5 Number of Scans        | 102                 |
| 6 Acquisition Time       | 1.3631              |
| 7 Acquisition Date       | 2021-03-27T21:55:32 |
| 8 Spectrometer Frequency | 100.61              |
| 9 Spectral Width         | 24038.5             |

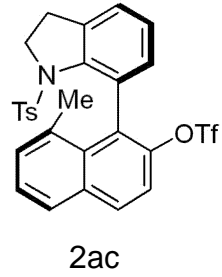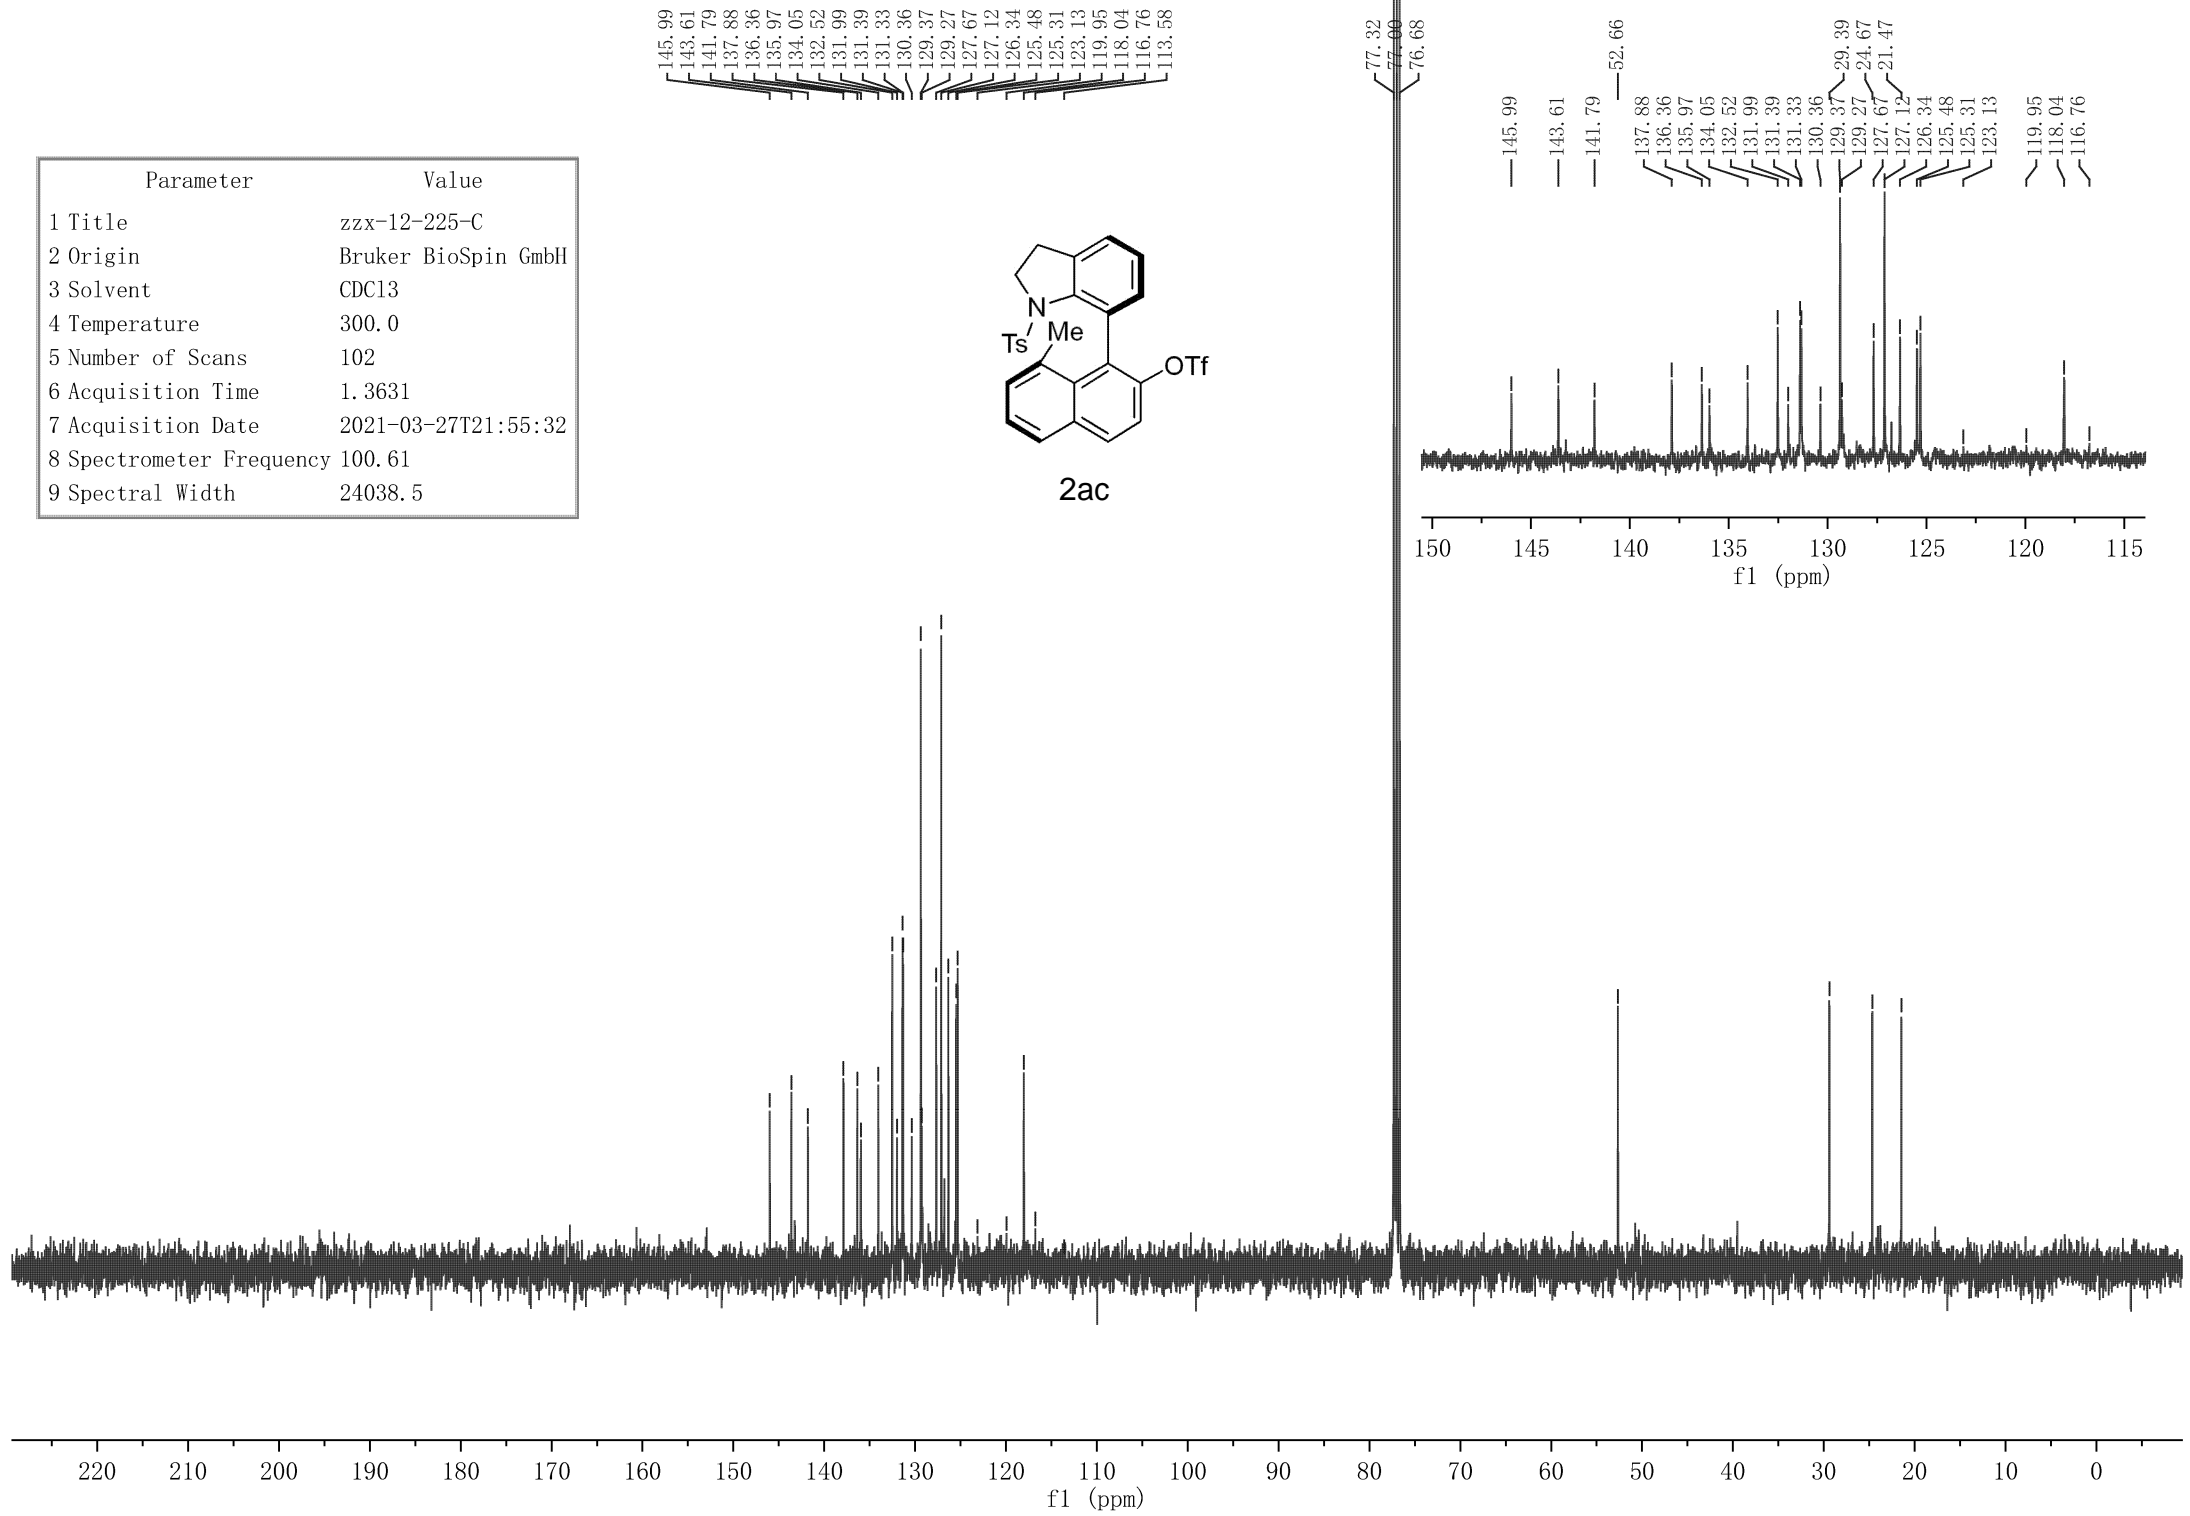

—74.56

| Parameter                | Value               |
|--------------------------|---------------------|
| 1 Title                  | zzx-18-8-Me-OTf-F   |
| 2 Origin                 |                     |
| 3 Solvent                | CDC13               |
| 4 Temperature            | 296.4               |
| 5 Number of Scans        | 16                  |
| 6 Acquisition Time       | 1.0000              |
| 7 Acquisition Date       | 2023-02-25T04:42:30 |
| 8 Spectrometer Frequency | 376.28              |
| 9 Spectral Width         | 96153.0             |

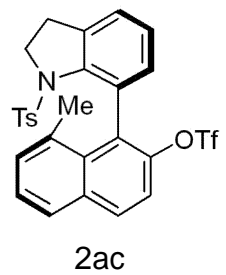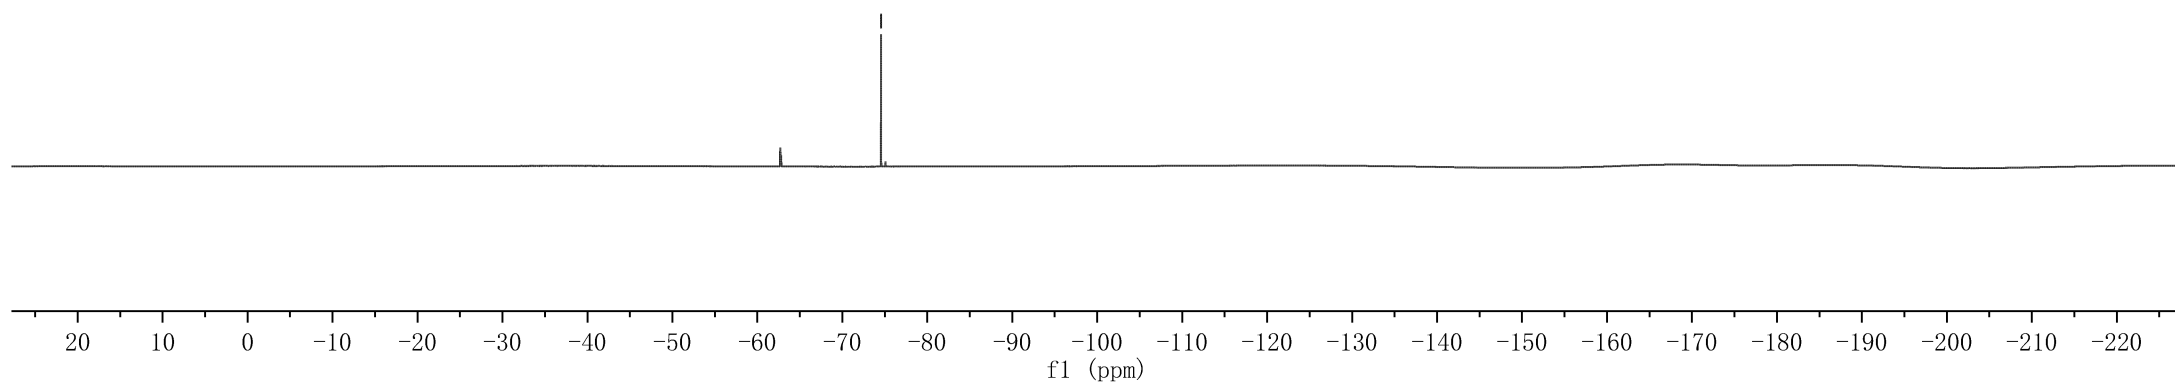

8.056  
8.034  
7.944  
7.924  
7.641  
7.618  
7.550  
7.531  
7.512  
7.371  
7.317  
7.299  
7.268  
7.233  
7.215  
7.096  
7.077  
7.058  
7.026  
7.006  
6.964  
6.940  
6.898  
6.879  
6.861  
6.755  
6.709  
6.678  
6.659

3.846  
3.816  
3.788  
3.682  
3.654  
3.631  
3.601

2.291  
2.062  
2.044  
2.026  
2.005  
1.960  
1.936  
1.911  
1.872

0.000

| Parameter                | Value               |
|--------------------------|---------------------|
| 1 Title                  | ZZX-14-69           |
| 2 Origin                 |                     |
| 3 Solvent                | CDC13               |
| 4 Temperature            | 298.0               |
| 5 Number of Scans        | 16                  |
| 6 Acquisition Time       | 4.0002              |
| 7 Acquisition Date       | 2022-03-19T01:12:01 |
| 8 Spectrometer Frequency | 399.93              |
| 9 Spectral Width         | 8012.0              |

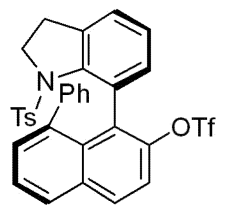

2ad

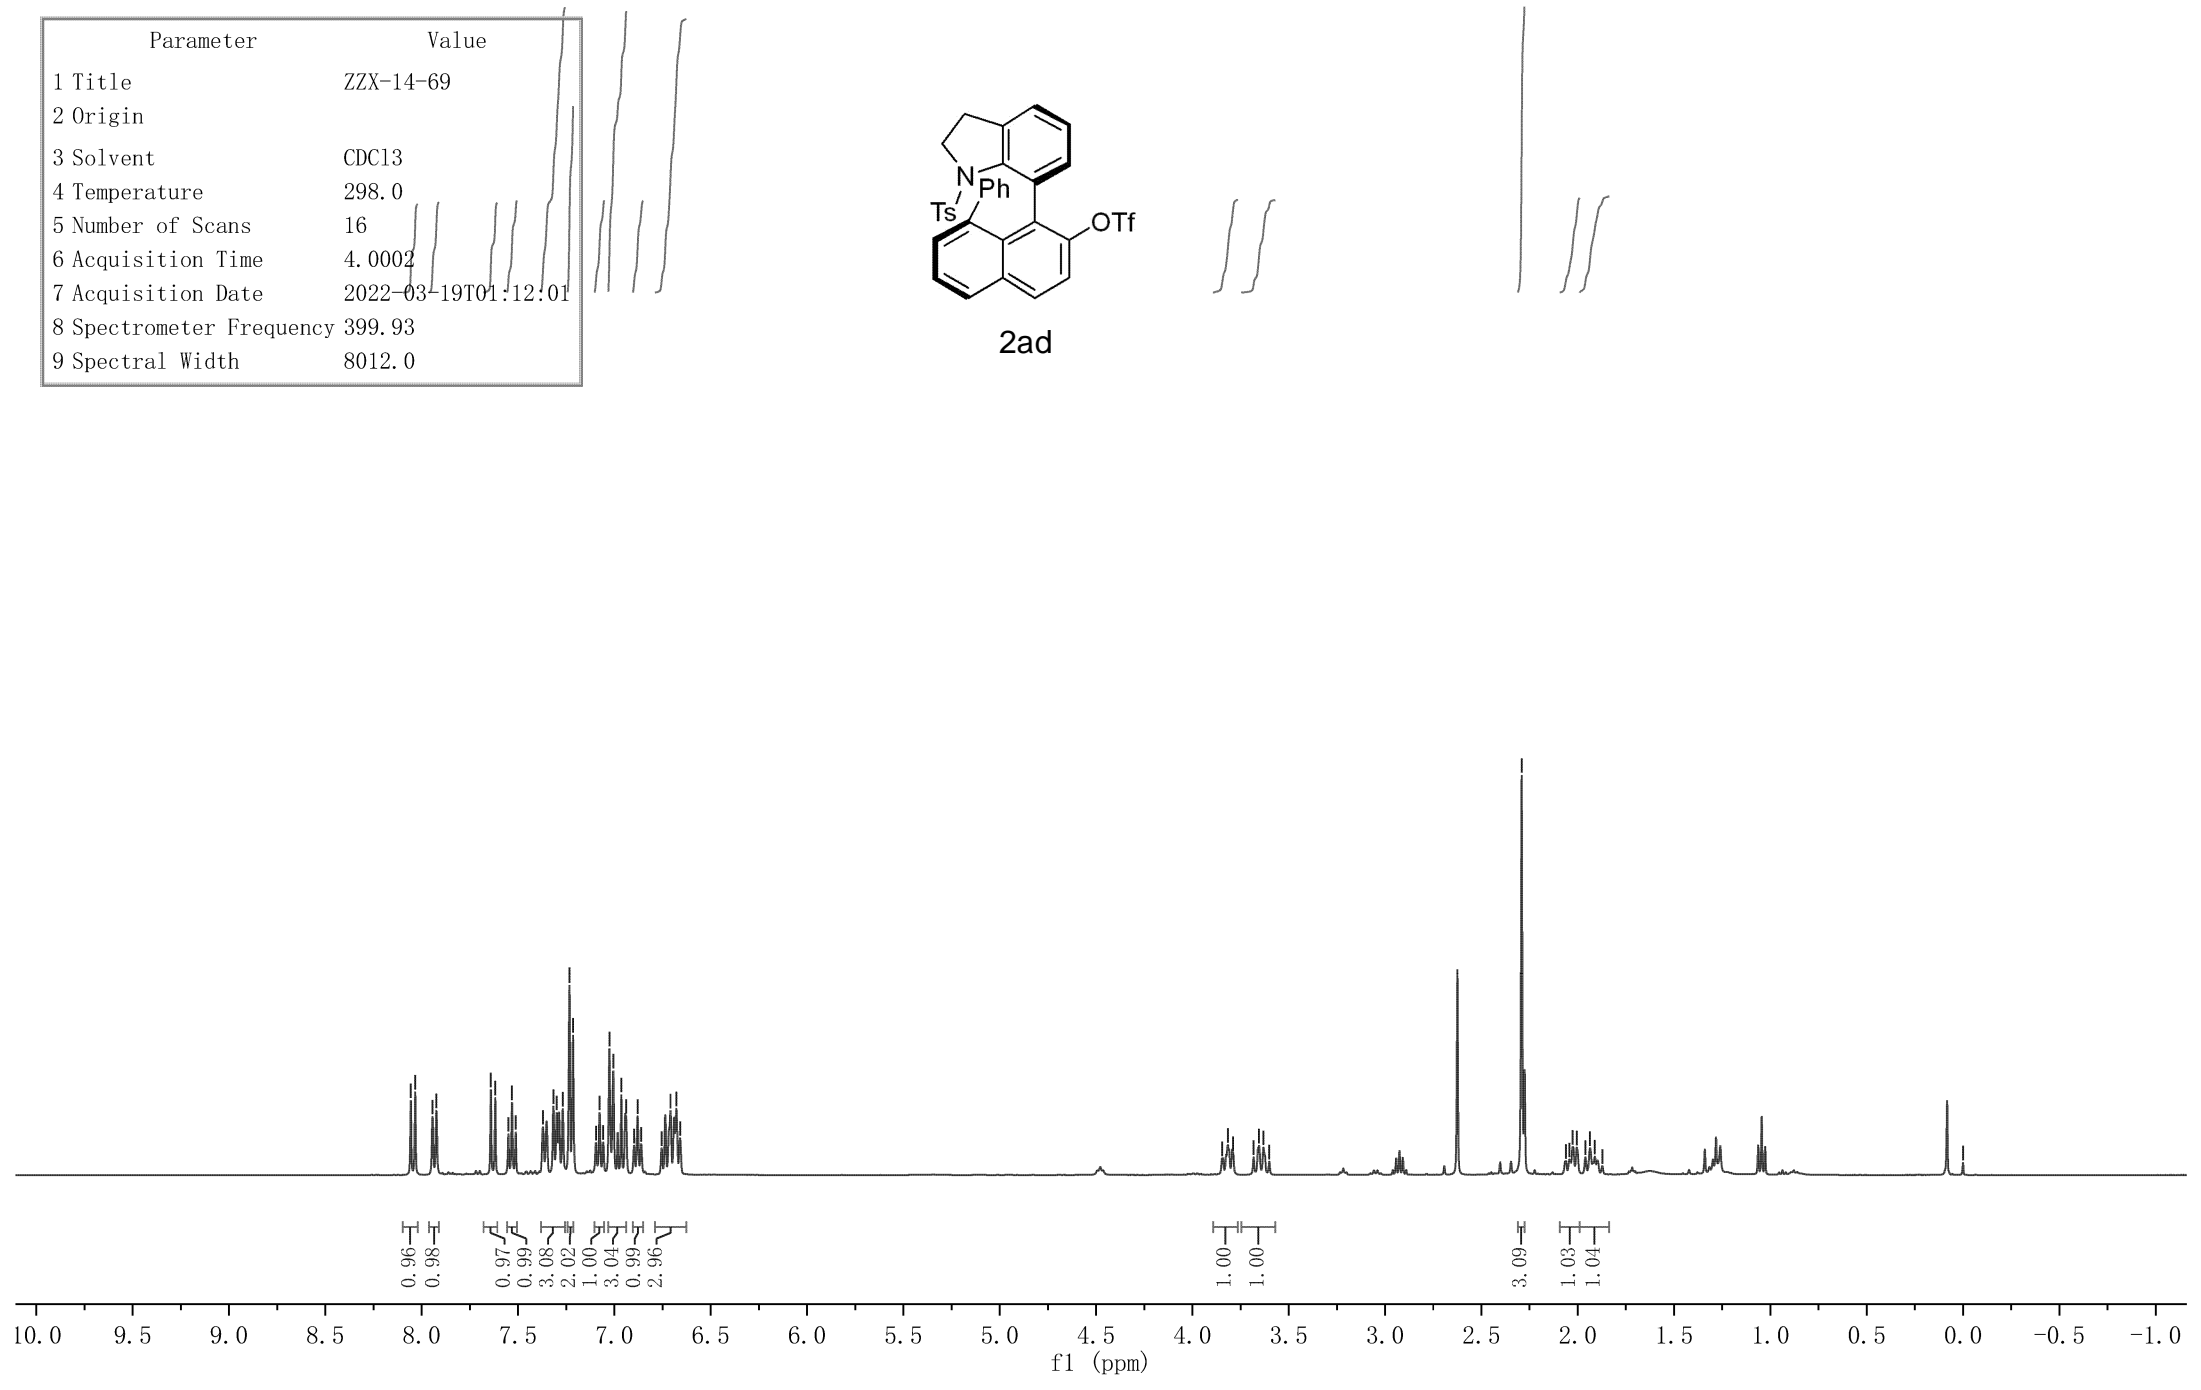

| Parameter                | Value               |
|--------------------------|---------------------|
| 1 Title                  | ZZX-14-69           |
| 2 Origin                 |                     |
| 3 Solvent                | CDC13               |
| 4 Temperature            | 297.9               |
| 5 Number of Scans        | 500                 |
| 6 Acquisition Time       | 1.0000              |
| 7 Acquisition Date       | 2022-03-19T01:29:15 |
| 8 Spectrometer Frequency | 100.56              |
| 9 Spectral Width         | 26041.0             |

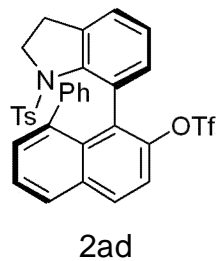

147.73  
143.57  
141.77  
140.93  
140.35  
137.03  
134.77  
133.66  
132.83  
132.74  
131.86  
131.33  
131.07  
130.12  
129.08  
128.89  
128.18  
127.60  
127.20  
126.49  
126.18  
125.68  
125.10  
123.09  
119.91  
118.78  
116.73  
113.55

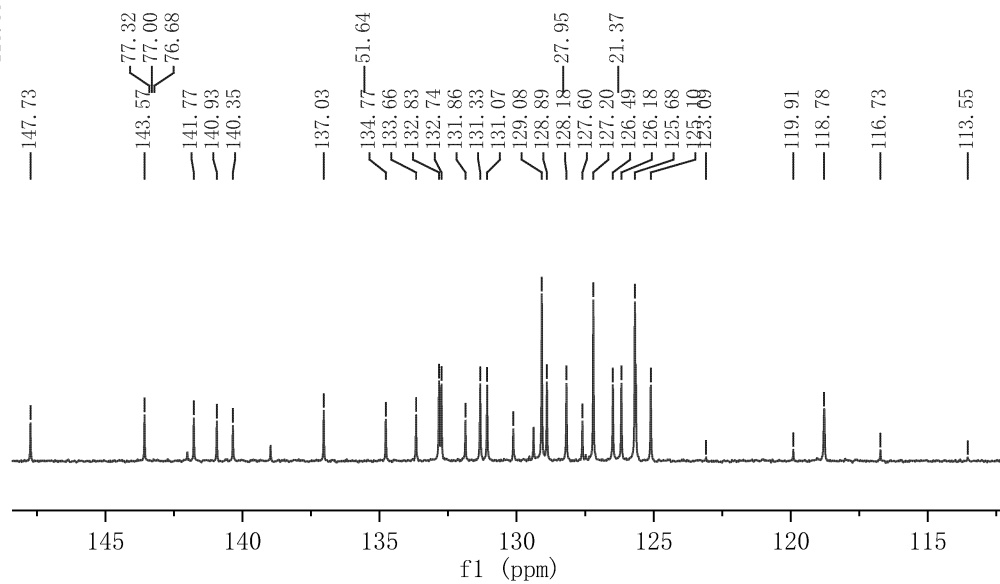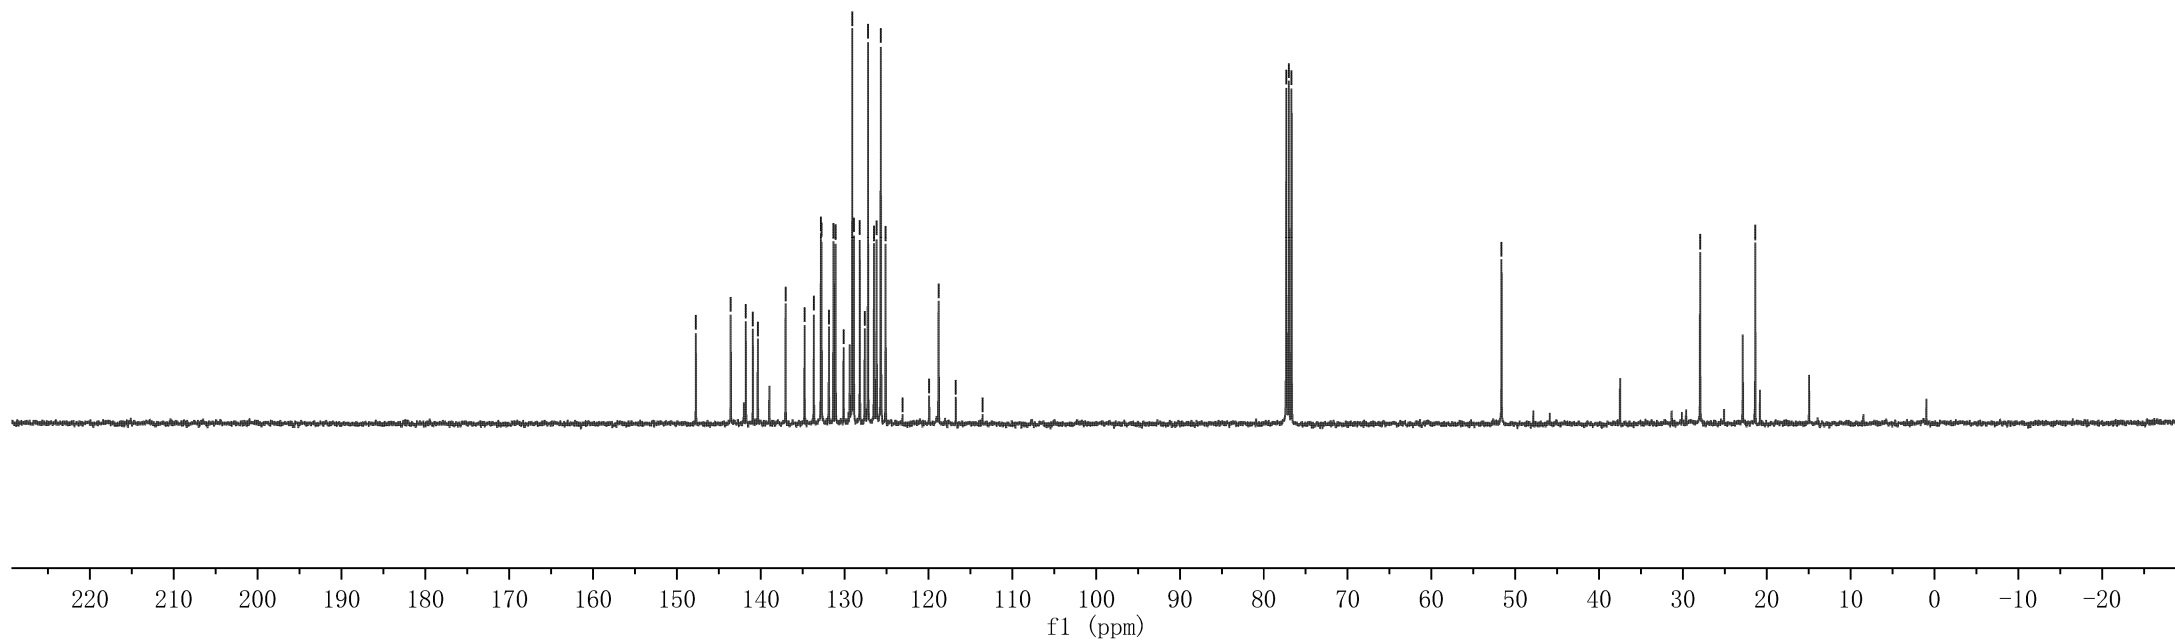

| Parameter                | Value               |
|--------------------------|---------------------|
| 1 Title                  | ZZX-18-P-OTf-8-Ph   |
| 2 Origin                 |                     |
| 3 Solvent                | CDC13               |
| 4 Temperature            | 297.4               |
| 5 Number of Scans        | 16                  |
| 6 Acquisition Time       | 1.0000              |
| 7 Acquisition Date       | 2023-02-09T11:02:07 |
| 8 Spectrometer Frequency | 376.28              |
| 9 Spectral Width         | 96153.0             |

—73.67

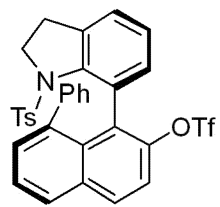

2ad

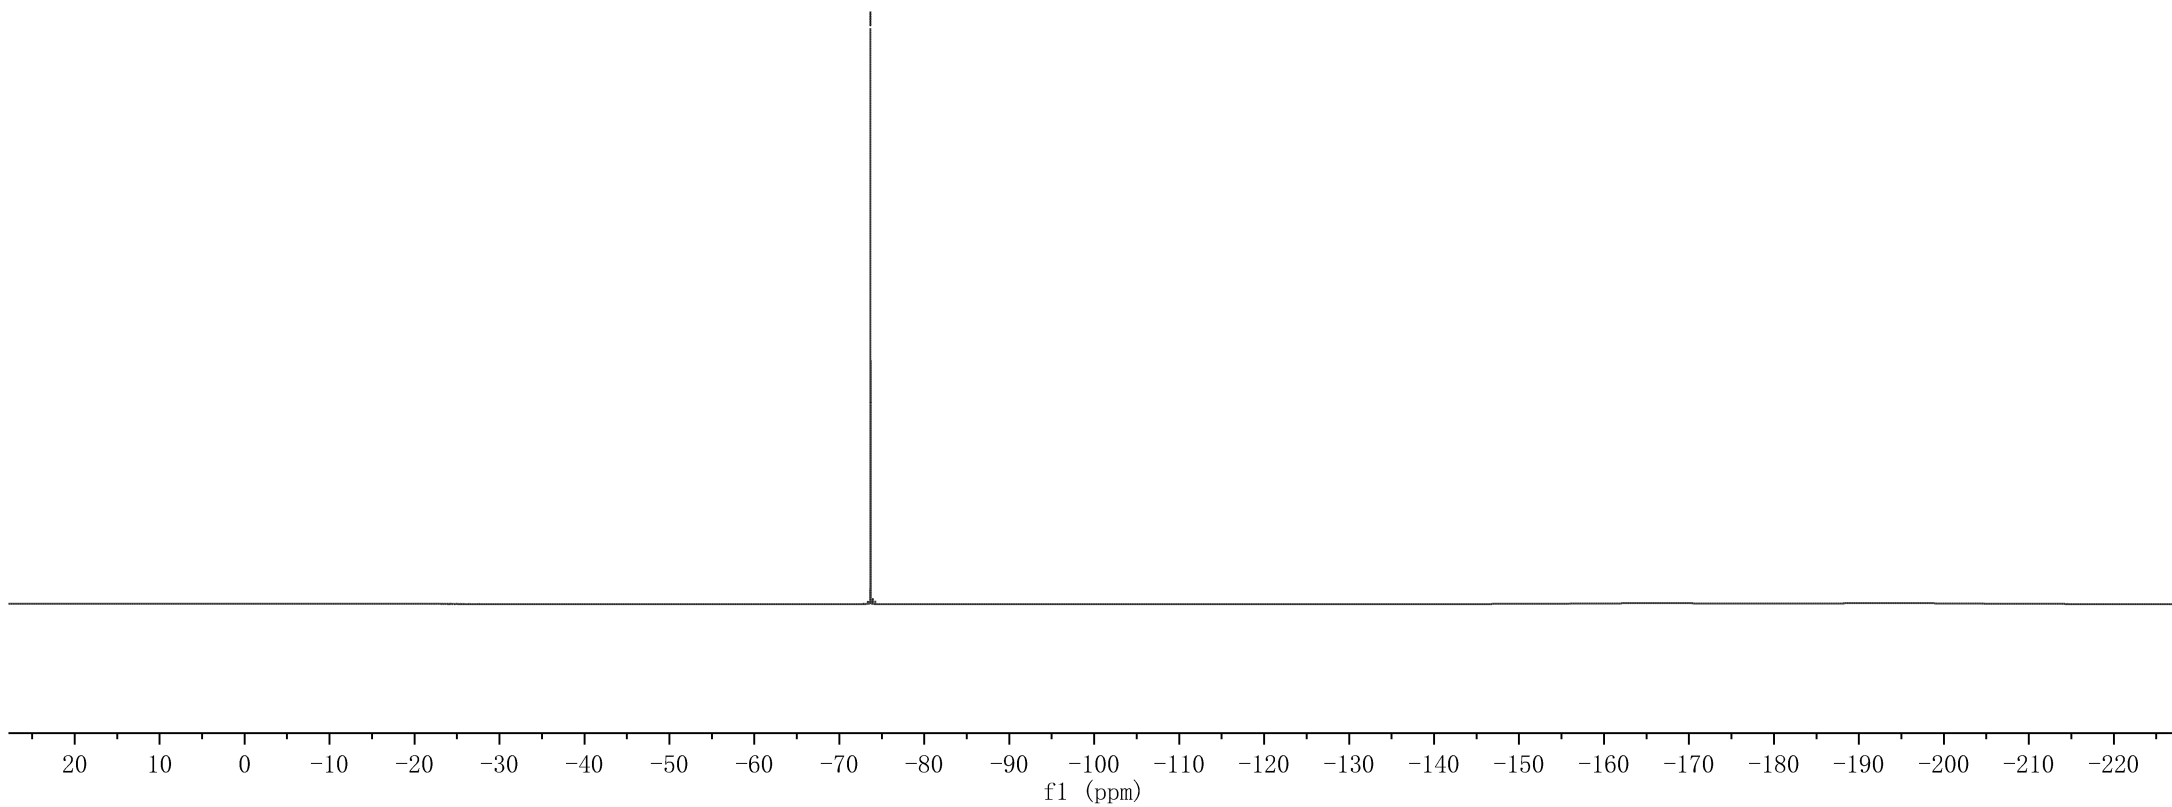



8.741  
8.720  
8.106  
8.085  
8.036  
8.016  
7.728  
7.710  
7.669  
7.689  
7.370  
7.360  
7.351  
7.316  
7.303  
7.083  
7.062  
6.878  
6.858

4.374  
4.357  
4.335  
4.320  
4.033  
4.004  
3.977  
3.953

2.677  
2.671  
2.650  
2.633  
2.594  
2.210

0.000

| Parameter                | Value               |
|--------------------------|---------------------|
| 1 Title                  | ZZX-18-36           |
| 2 Origin                 |                     |
| 3 Solvent                | CDC13               |
| 4 Temperature            | 295.1               |
| 5 Number of Scans        | 16                  |
| 6 Acquisition Time       | 4.0002              |
| 7 Acquisition Date       | 2023-02-03T09:37:41 |
| 8 Spectrometer Frequency | 399.90              |
| 9 Spectral Width         | 8012.0              |

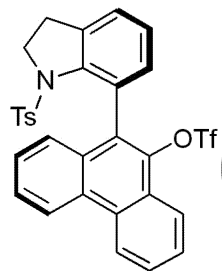

2ae

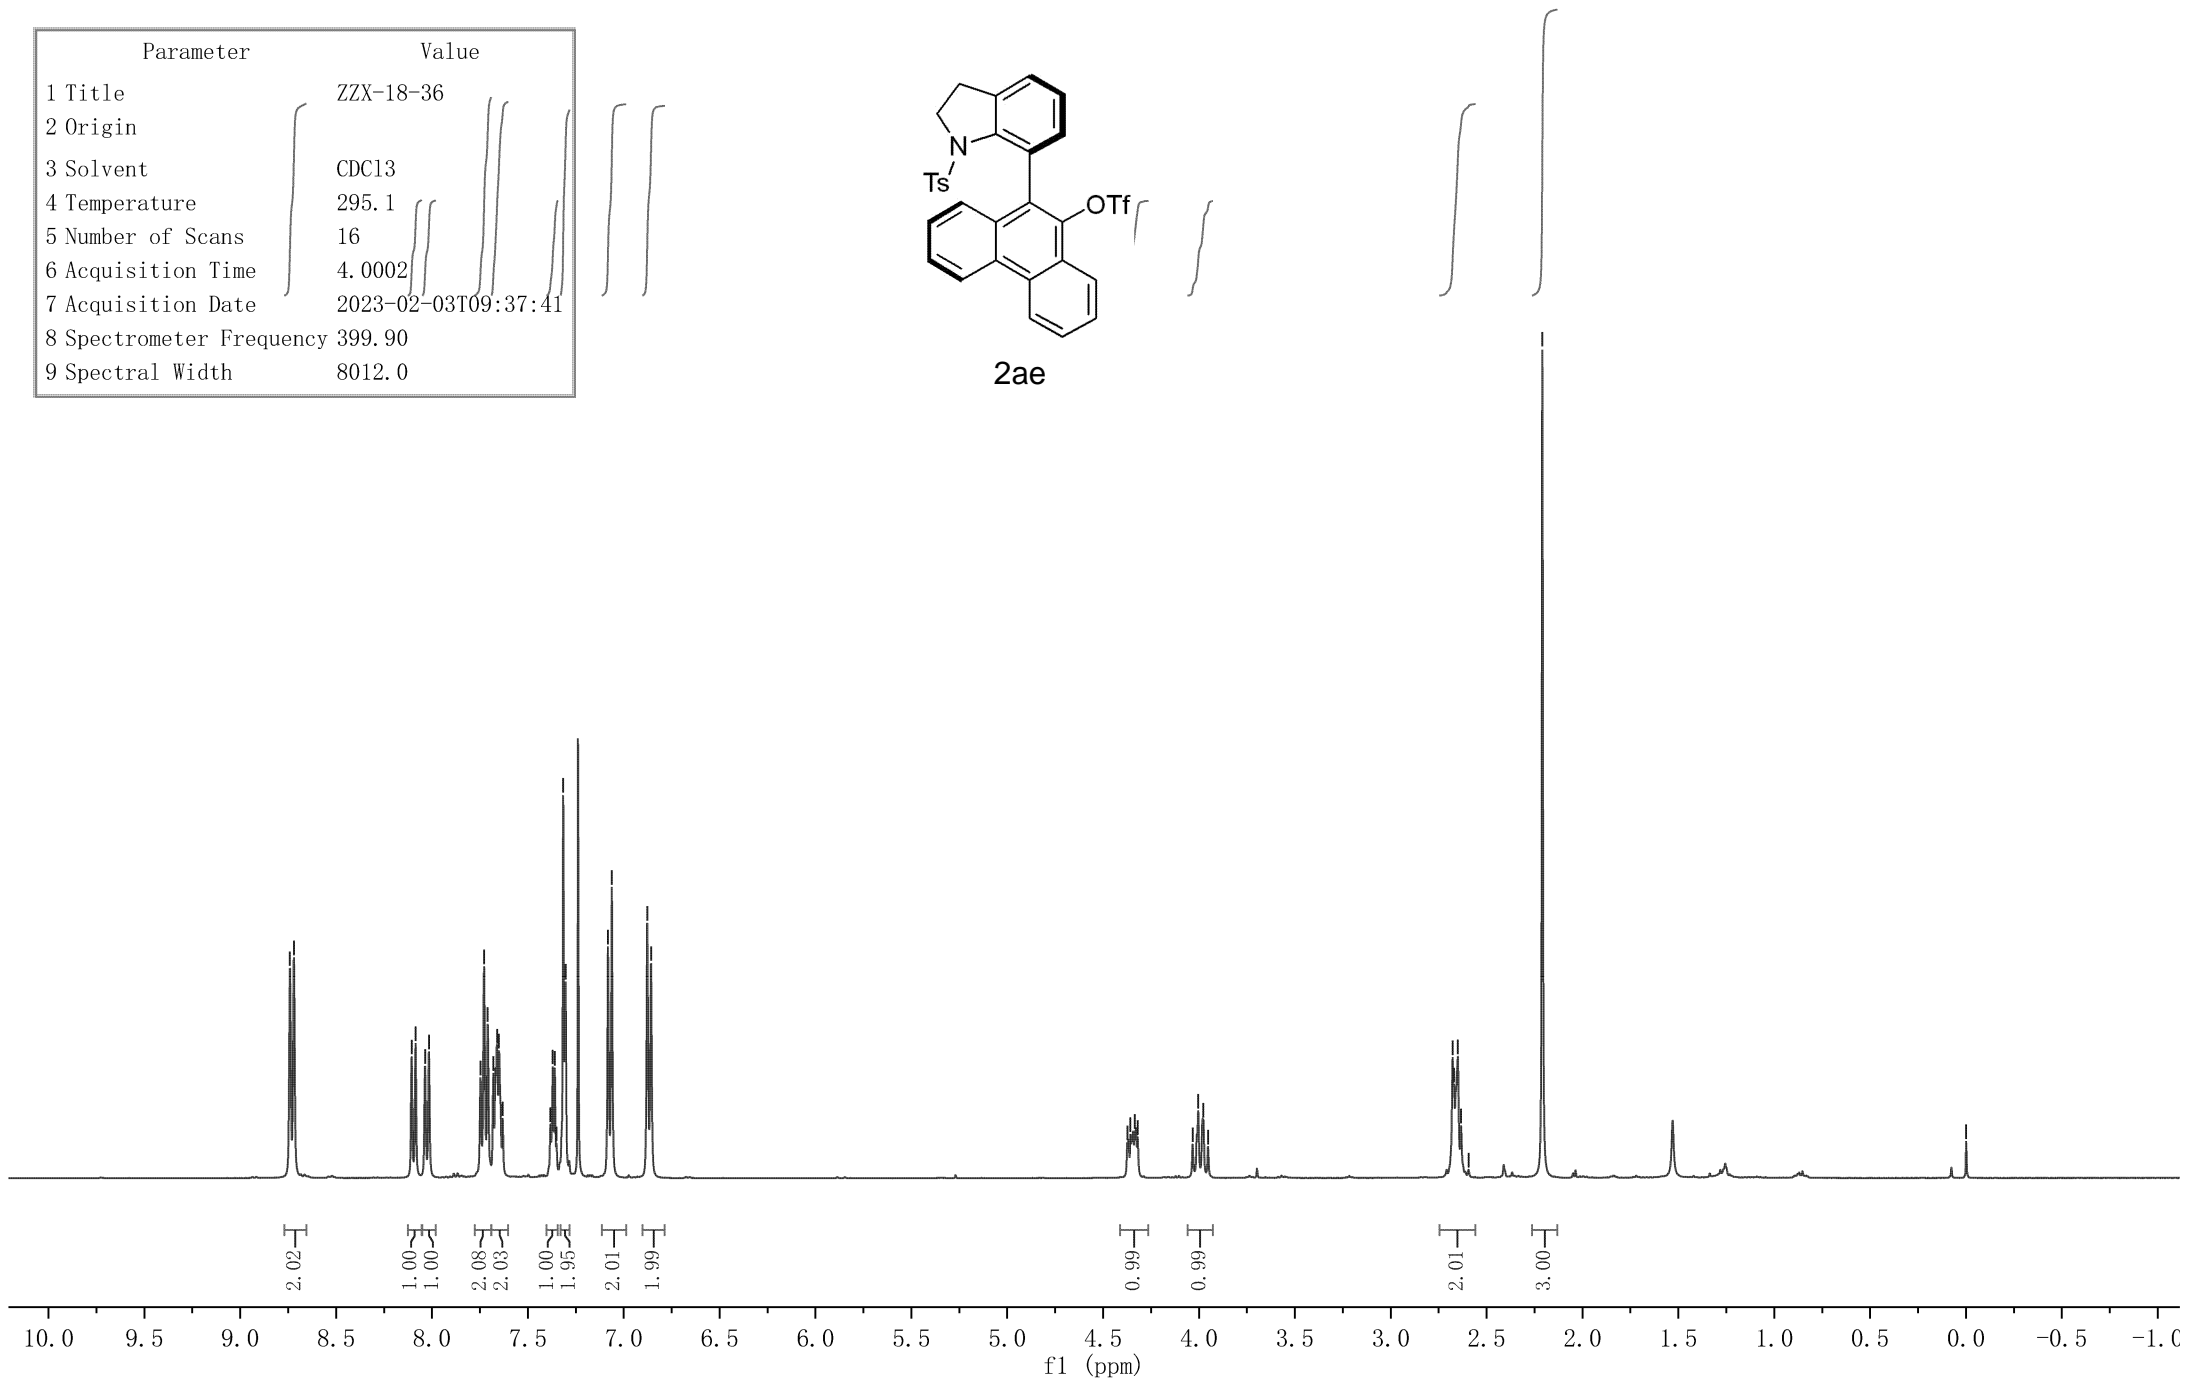

| Parameter                | Value               |
|--------------------------|---------------------|
| 1 Title                  | ZZX-18-36           |
| 2 Origin                 |                     |
| 3 Solvent                | CDC13               |
| 4 Temperature            | 295.1               |
| 5 Number of Scans        | 300                 |
| 6 Acquisition Time       | 1.0000              |
| 7 Acquisition Date       | 2023-02-03T09:50:12 |
| 8 Spectrometer Frequency | 100.56              |
| 9 Spectral Width         | 26041.0             |

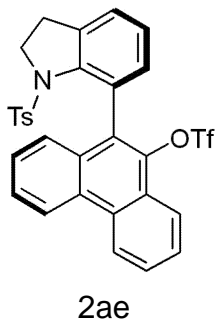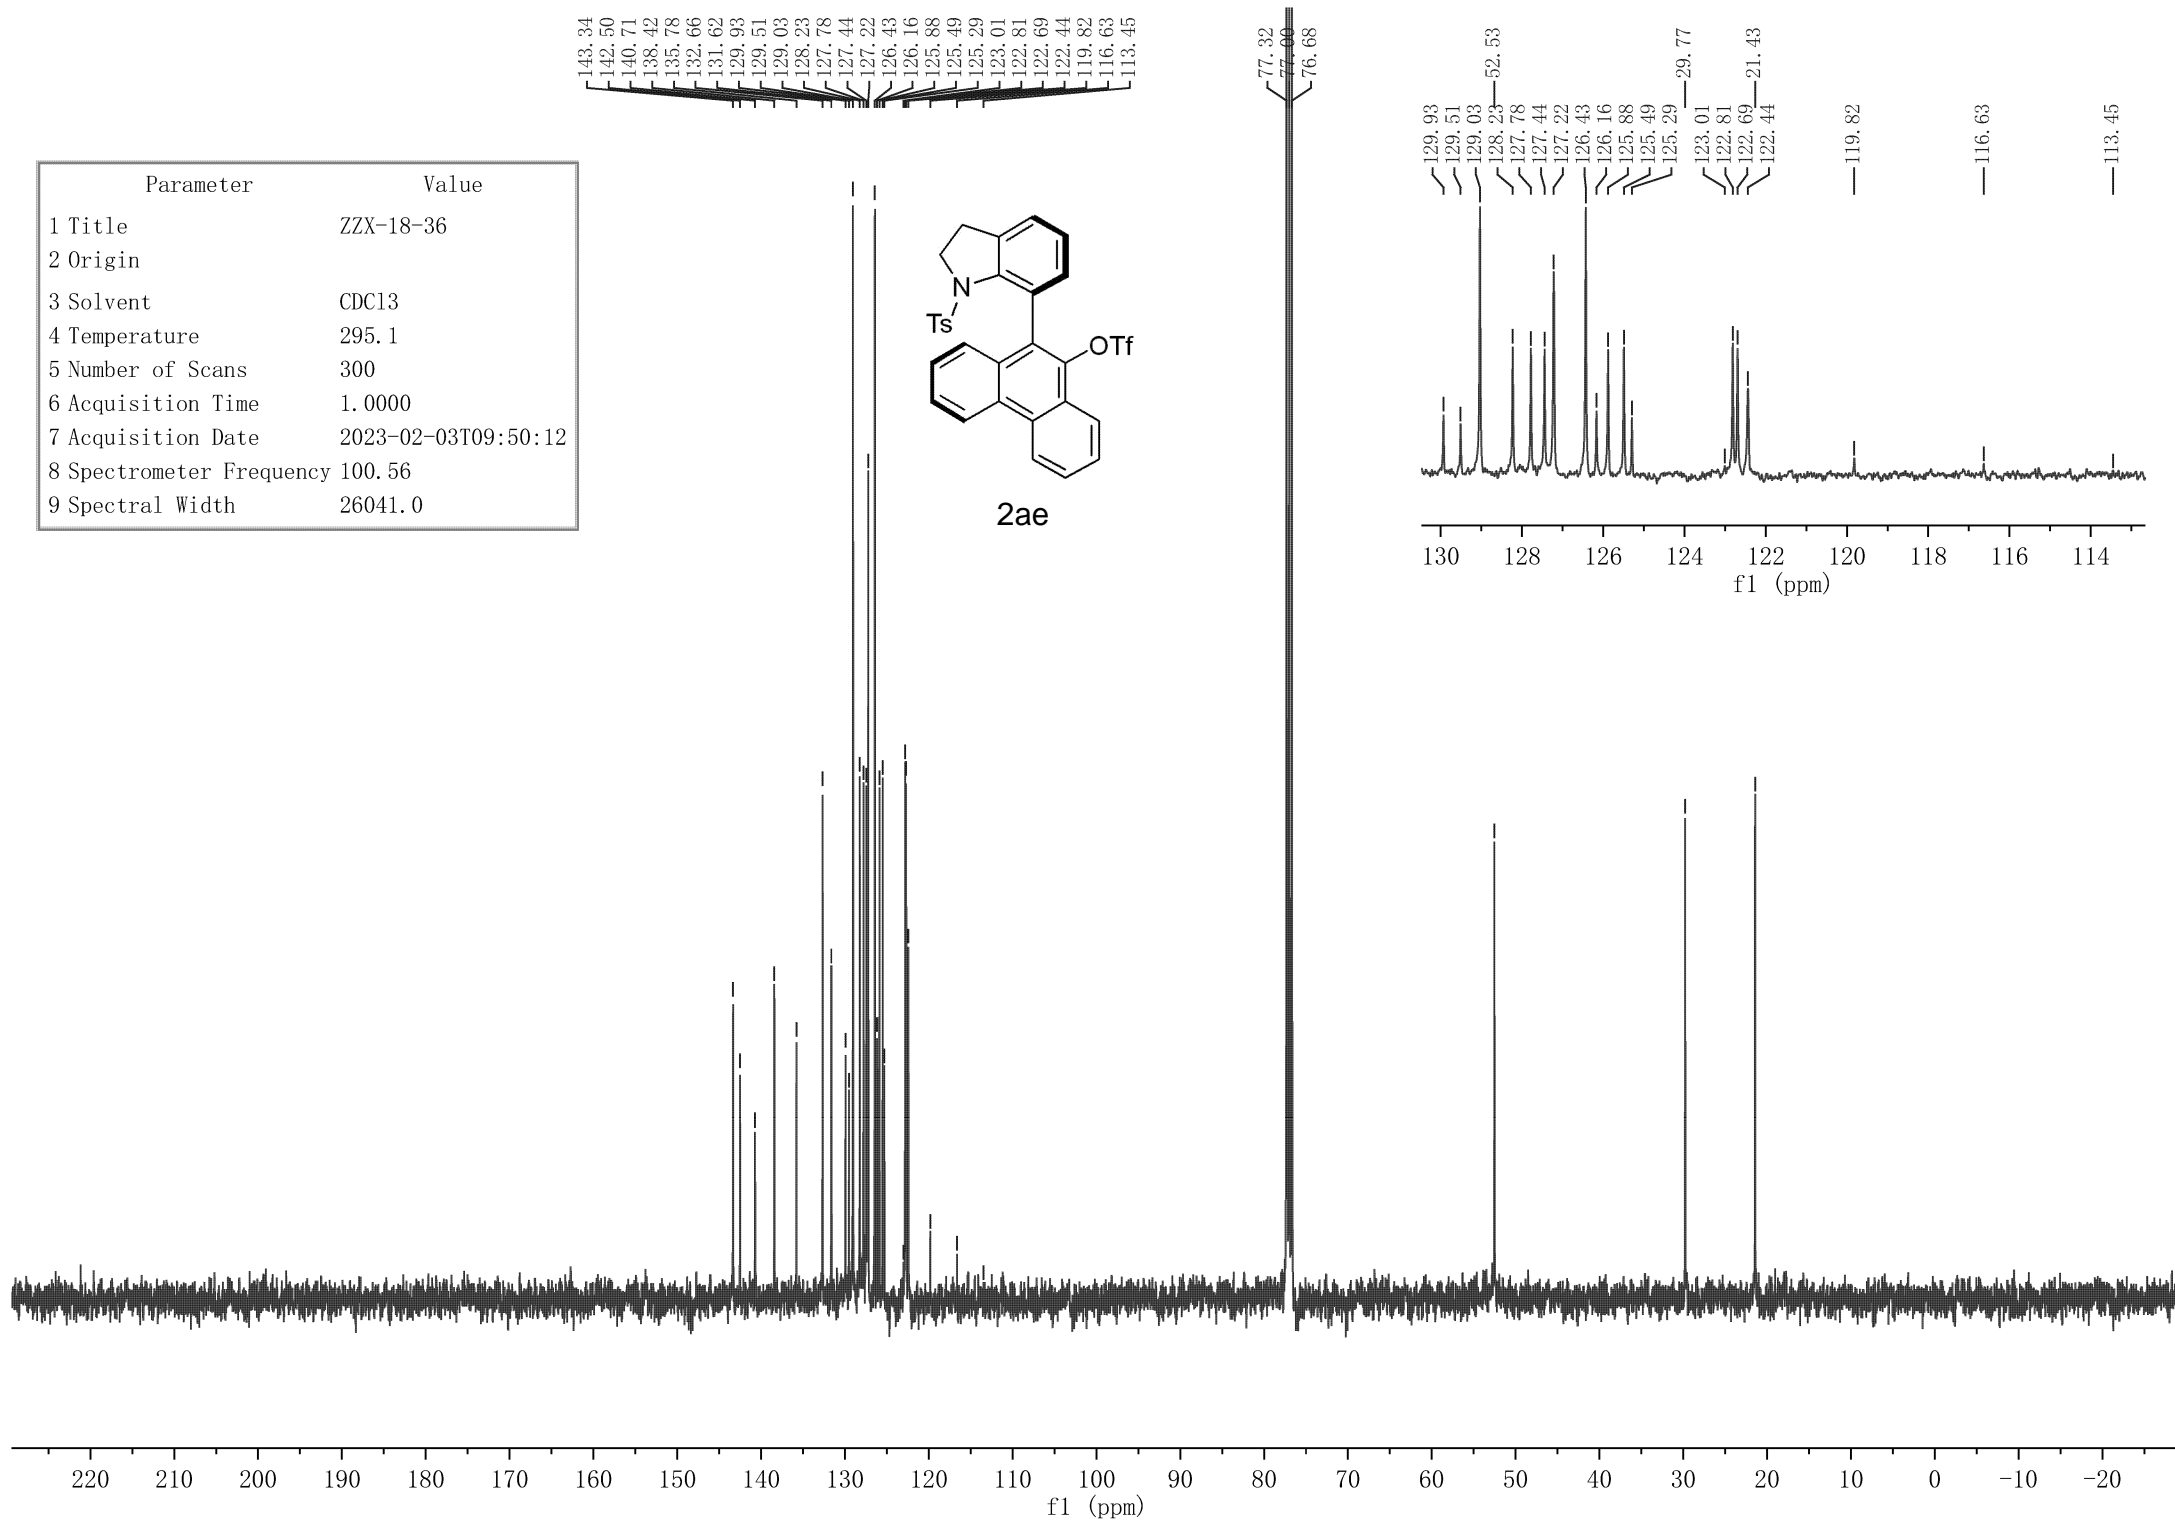

| Parameter                | Value               |
|--------------------------|---------------------|
| 1 Title                  | ZZX-18-36           |
| 2 Origin                 |                     |
| 3 Solvent                | CDC13               |
| 4 Temperature            | 295.2               |
| 5 Number of Scans        | 16                  |
| 6 Acquisition Time       | 1.0000              |
| 7 Acquisition Date       | 2023-02-03T09:53:26 |
| 8 Spectrometer Frequency | 376.28              |
| 9 Spectral Width         | 96153.0             |

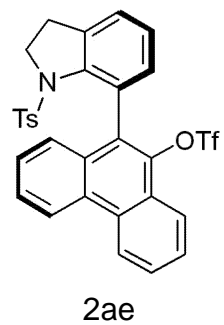

—73.70

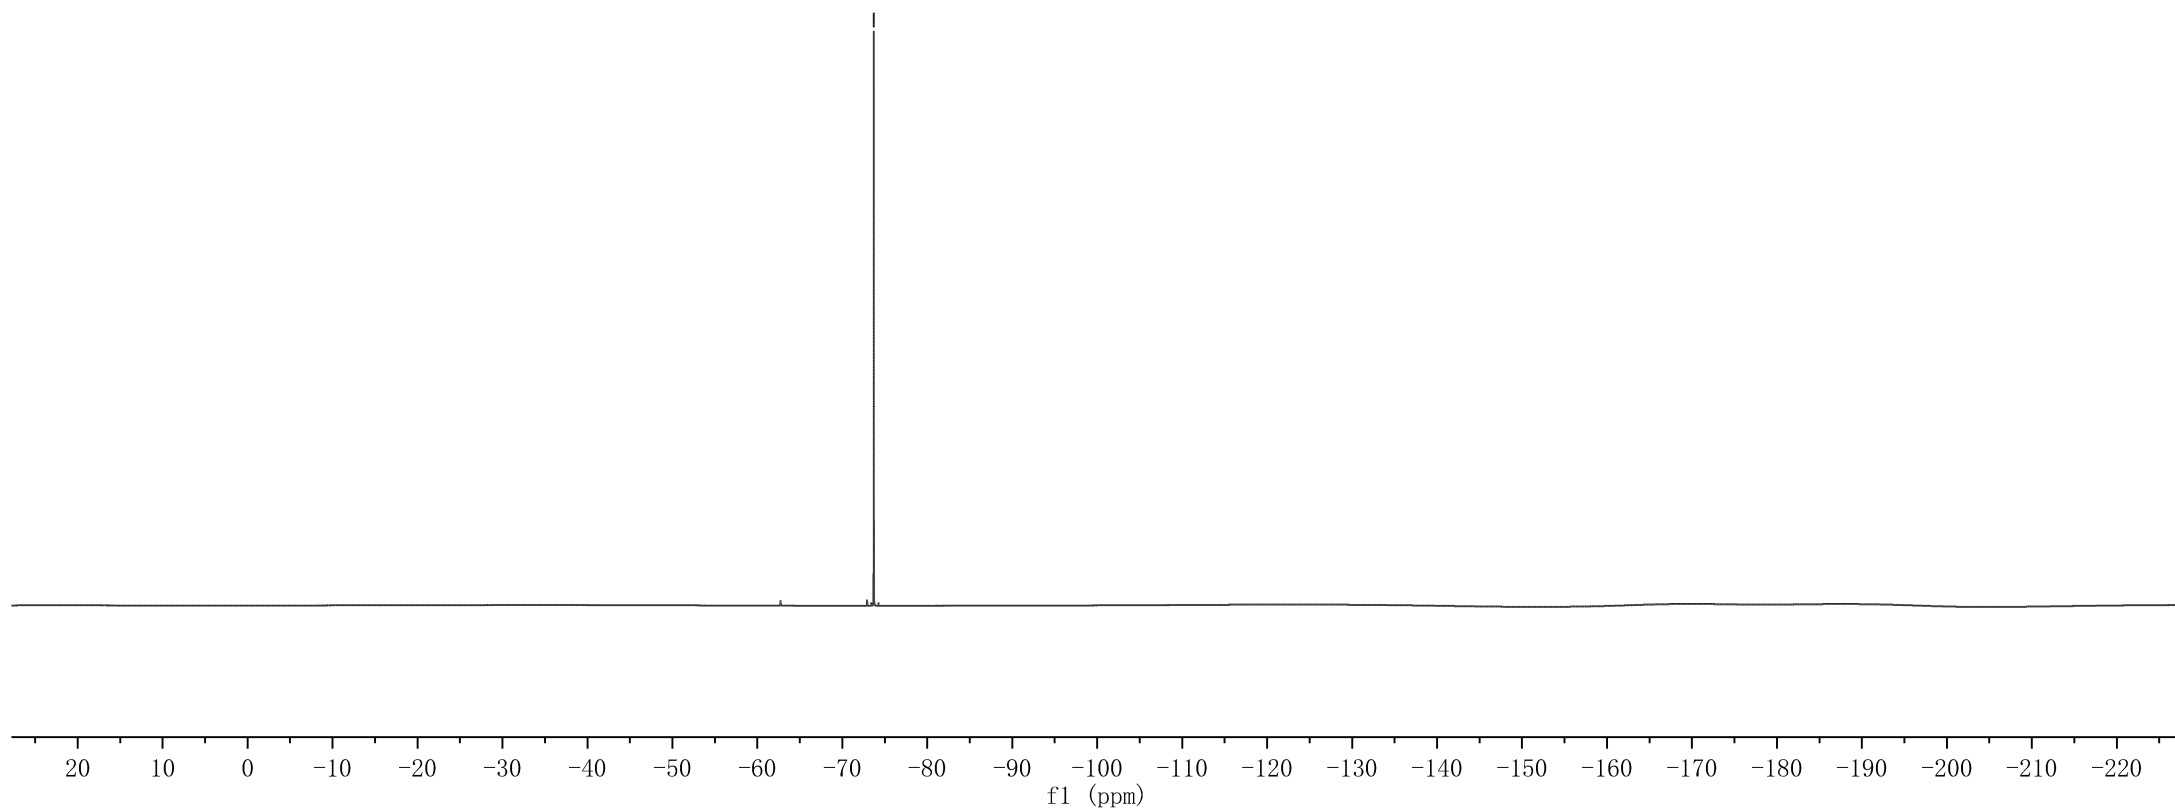

7.349  
7.329  
7.219  
7.151  
7.130  
7.104  
7.055  
7.033

4.059  
4.027  
4.008  
3.988  
3.935

2.899  
2.858  
2.844  
2.812  
2.756  
2.714  
2.662  
2.607  
2.376  
2.353  
2.330  
2.310  
1.860  
1.757  
1.741  
1.727

— 0.000

| Parameter                | Value               |
|--------------------------|---------------------|
| 1 Title                  | ZZX-15-36           |
| 2 Origin                 |                     |
| 3 Solvent                | CDC13               |
| 4 Temperature            | 297.2               |
| 5 Number of Scans        | 16                  |
| 6 Acquisition Time       | 4.0002              |
| 7 Acquisition Date       | 2022-03-19T01:34:07 |
| 8 Spectrometer Frequency | 399.93              |
| 9 Spectral Width         | 8012.0              |

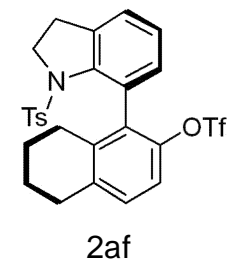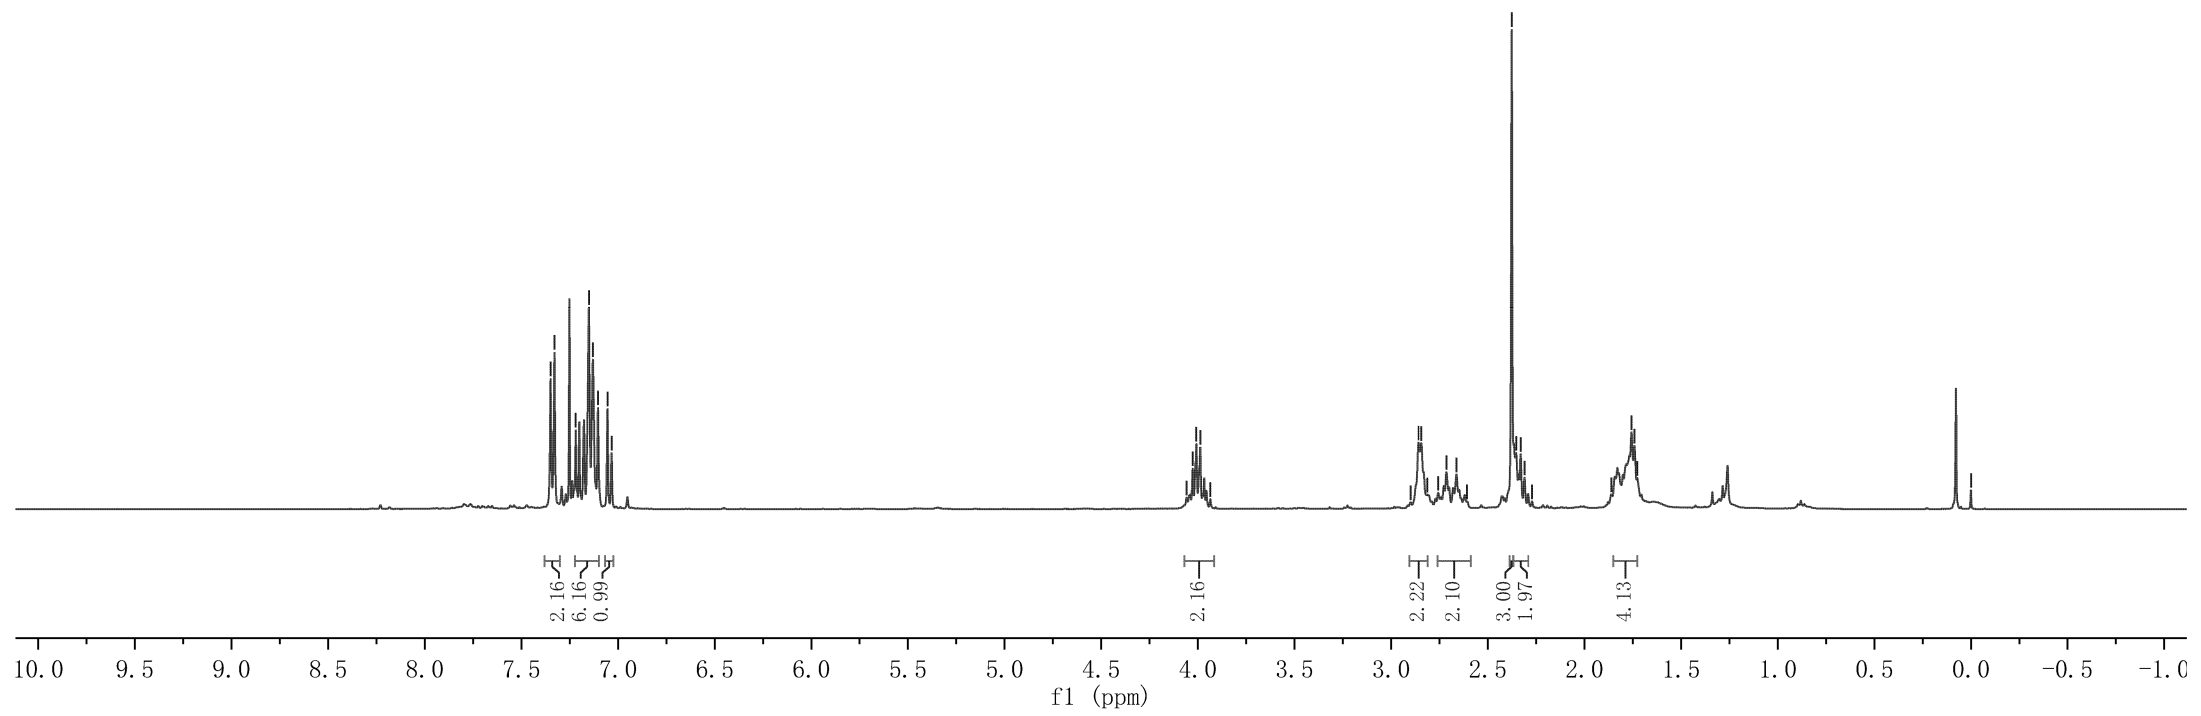

| Parameter                | Value               |
|--------------------------|---------------------|
| 1 Title                  | ZZX-15-36           |
| 2 Origin                 |                     |
| 3 Solvent                | CDC13               |
| 4 Temperature            | 297.4               |
| 5 Number of Scans        | 500                 |
| 6 Acquisition Time       | 1.0000              |
| 7 Acquisition Date       | 2022-03-19T01:51:22 |
| 8 Spectrometer Frequency | 100.56              |
| 9 Spectral Width         | 26041.0             |

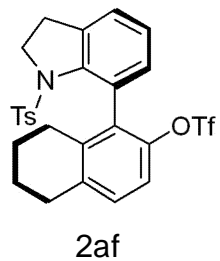

145.20  
143.76  
141.40  
138.73  
138.14  
137.50  
135.26  
132.64  
131.04  
129.63  
129.33  
127.87  
127.26  
126.37  
124.84  
123.11  
119.93  
117.36  
116.74  
113.56

77.32  
77.00  
76.68

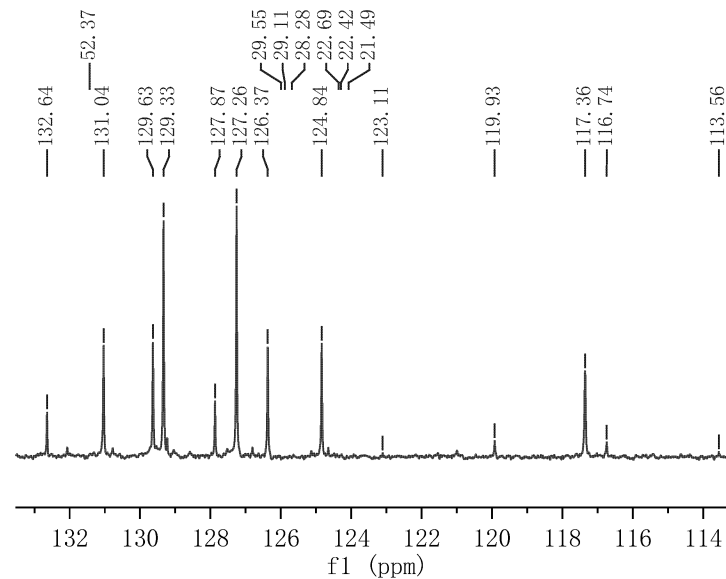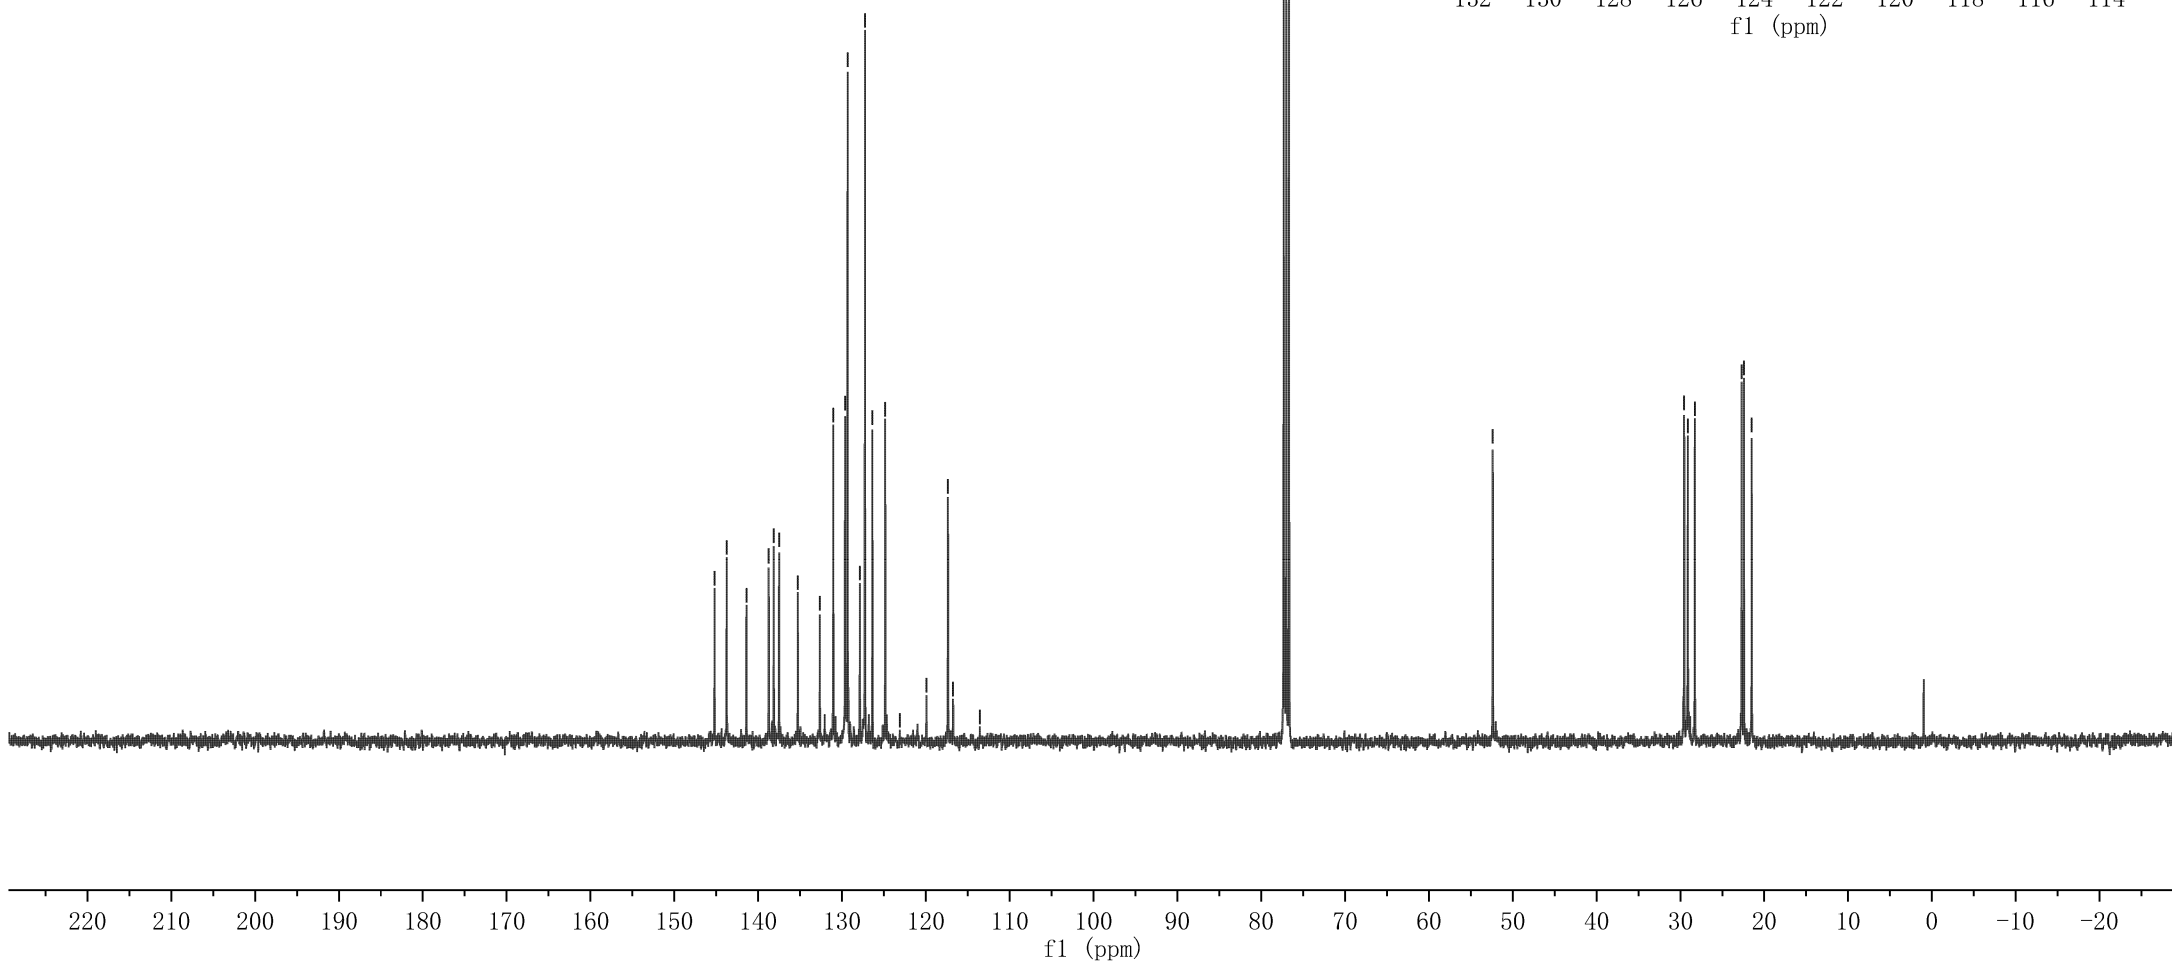

—74.57

| Parameter                | Value                |
|--------------------------|----------------------|
| 1 Title                  | ZZX-18-P-OTf-4H-naph |
| 2 Origin                 |                      |
| 3 Solvent                | CDC13                |
| 4 Temperature            | 297.4                |
| 5 Number of Scans        | 16                   |
| 6 Acquisition Time       | 1.0000               |
| 7 Acquisition Date       | 2023-02-09T11:15:30  |
| 8 Spectrometer Frequency | 376.28               |
| 9 Spectral Width         | 96153.0              |

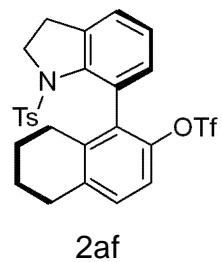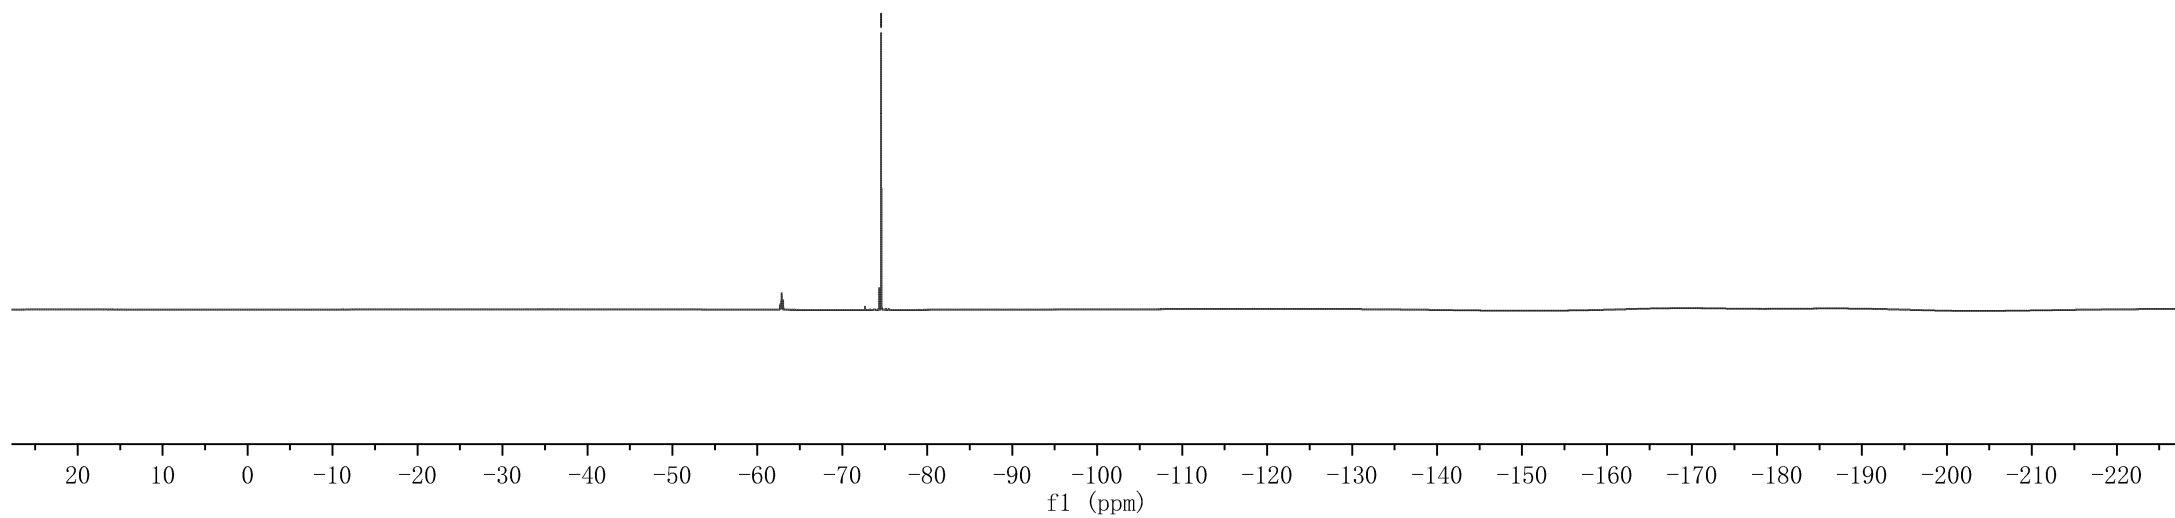

7.874  
7.852  
7.812  
7.792  
7.687  
7.666  
7.493  
7.471  
7.449  
7.414  
7.395  
7.376  
7.288  
7.263  
7.255  
7.157  
7.150  
7.144  
7.135  
7.064  
7.044

4.198  
4.167  
4.092  
4.040

2.691  
2.651  
2.632  
2.611  
2.572  
2.553  
2.540  
2.502  
2.346

0.000

| Parameter                | Value               |
|--------------------------|---------------------|
| 1 Title                  | zzx-12-57-H         |
| 2 Origin                 | Bruker BioSpin GmbH |
| 3 Solvent                | CDC13               |
| 4 Temperature            | 298.0               |
| 5 Number of Scans        | 5                   |
| 6 Acquisition Time       | 4.0894              |
| 7 Acquisition Date       | 2021-01-14T21:37:51 |
| 8 Spectrometer Frequency | 400.13              |
| 9 Spectral Width         | 8012.8              |

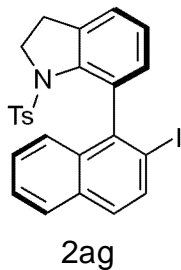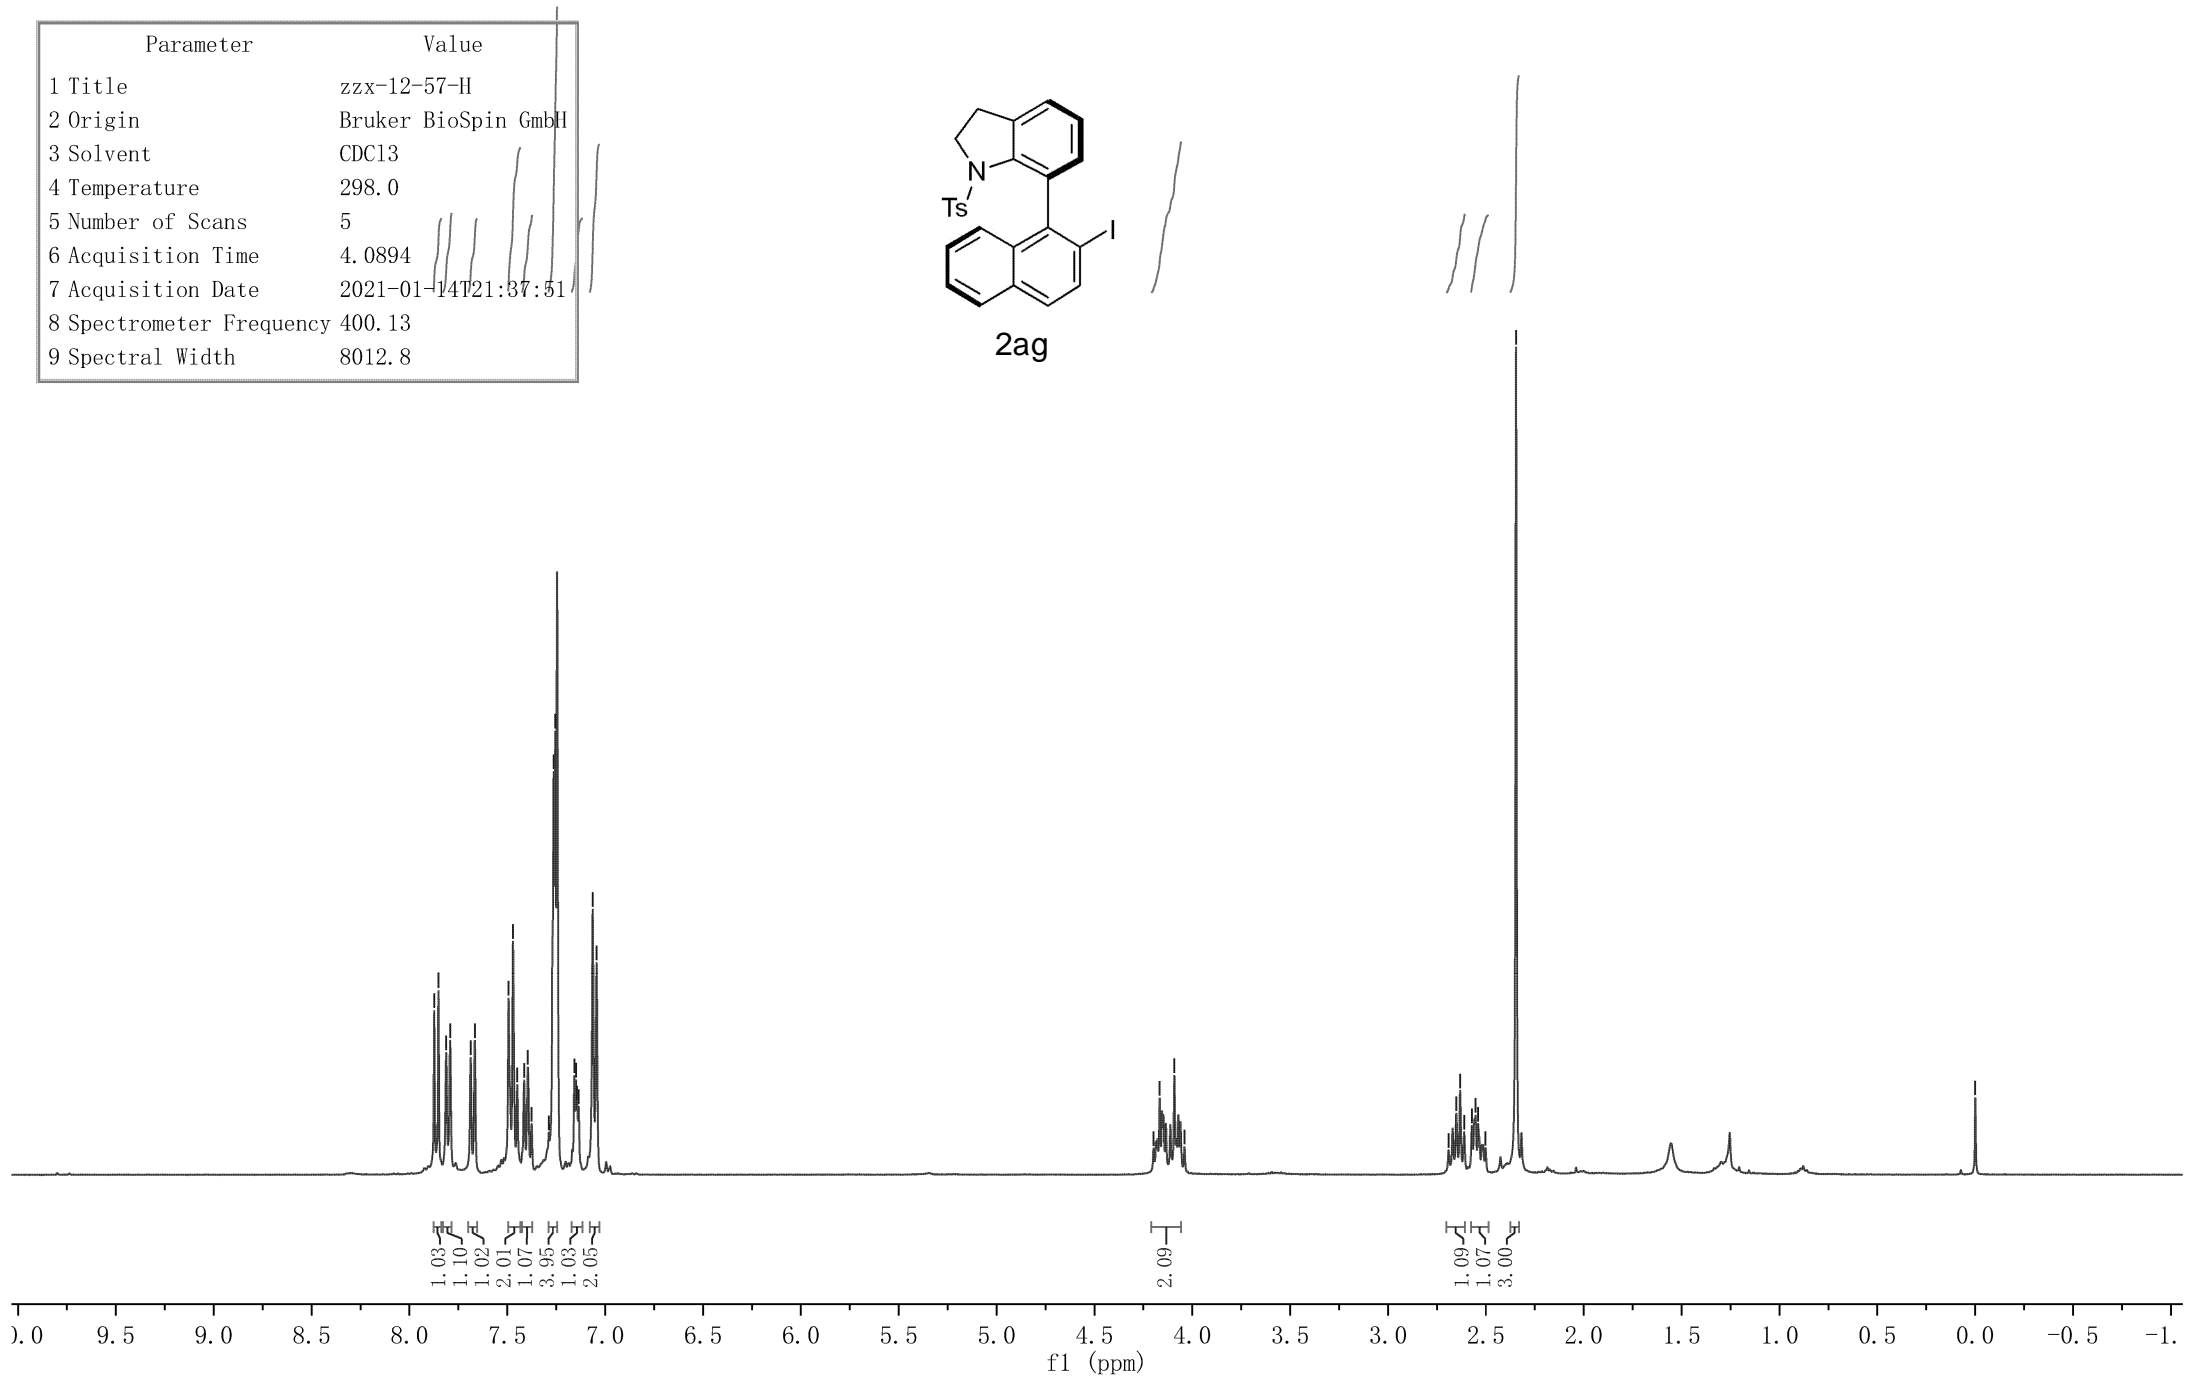

| Parameter                | Value               |
|--------------------------|---------------------|
| 1 Title                  | zzx-12-57-C         |
| 2 Origin                 | Bruker BioSpin GmbH |
| 3 Solvent                | CDC13               |
| 4 Temperature            | 300.0               |
| 5 Number of Scans        | 159                 |
| 6 Acquisition Time       | 1.3631              |
| 7 Acquisition Date       | 2021-01-14T21:39:54 |
| 8 Spectrometer Frequency | 100.61              |
| 9 Spectral Width         | 24038.5             |

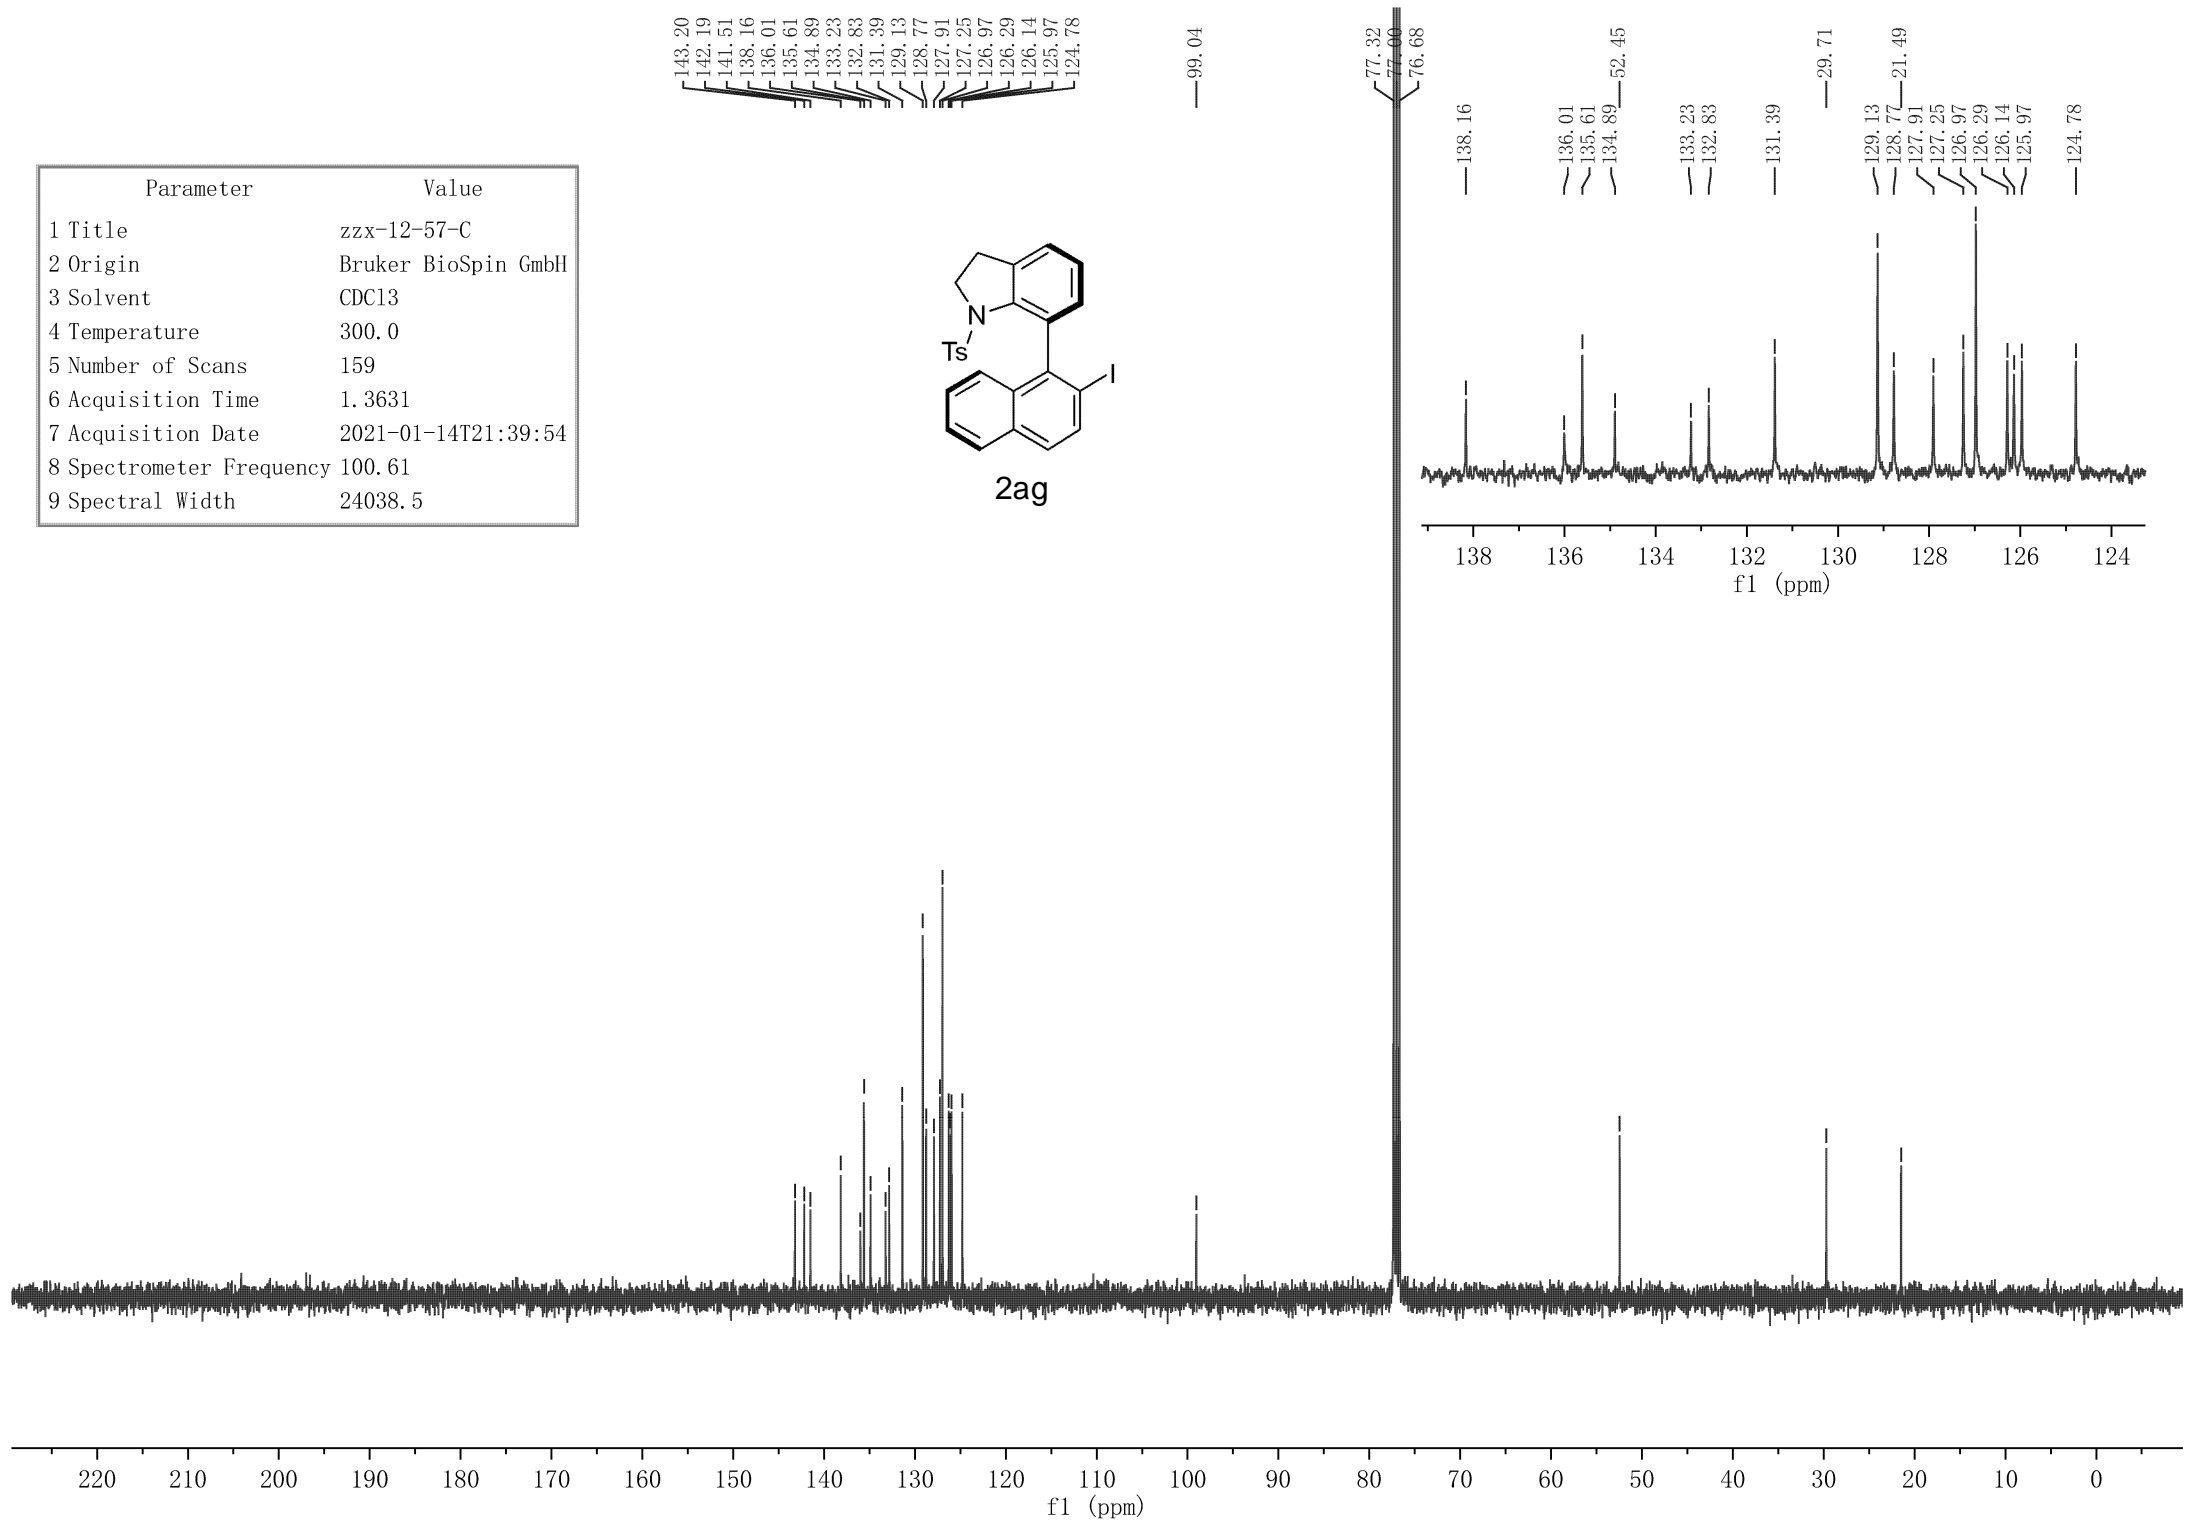



7.813  
7.791  
7.771  
7.751  
7.560  
7.556  
7.539  
7.536  
7.489  
7.468  
7.379  
7.340  
7.320  
7.291  
7.234  
7.220  
7.166  
7.152  
7.144  
7.030  
7.009  
6.969  
6.949

4.130  
4.097  
4.081  
4.066  
3.997  
3.978  
3.947  
3.928

2.939  
2.905  
2.888  
2.871  
2.731  
2.693  
2.674  
2.635  
2.309

1.317  
1.300  
1.101  
1.084

0.000

| Parameter                | Value               |
|--------------------------|---------------------|
| 1 Title                  | zzx-11-119-H        |
| 2 Origin                 | Bruker BioSpin GmbH |
| 3 Solvent                | CDC13               |
| 4 Temperature            | 298.0               |
| 5 Number of Scans        | 6                   |
| 6 Acquisition Time       | 4.0894              |
| 7 Acquisition Date       | 2020-11-14T14:28:55 |
| 8 Spectrometer Frequency | 400.13              |
| 9 Spectral Width         | 8012.8              |

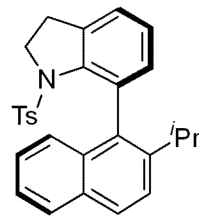

2ah

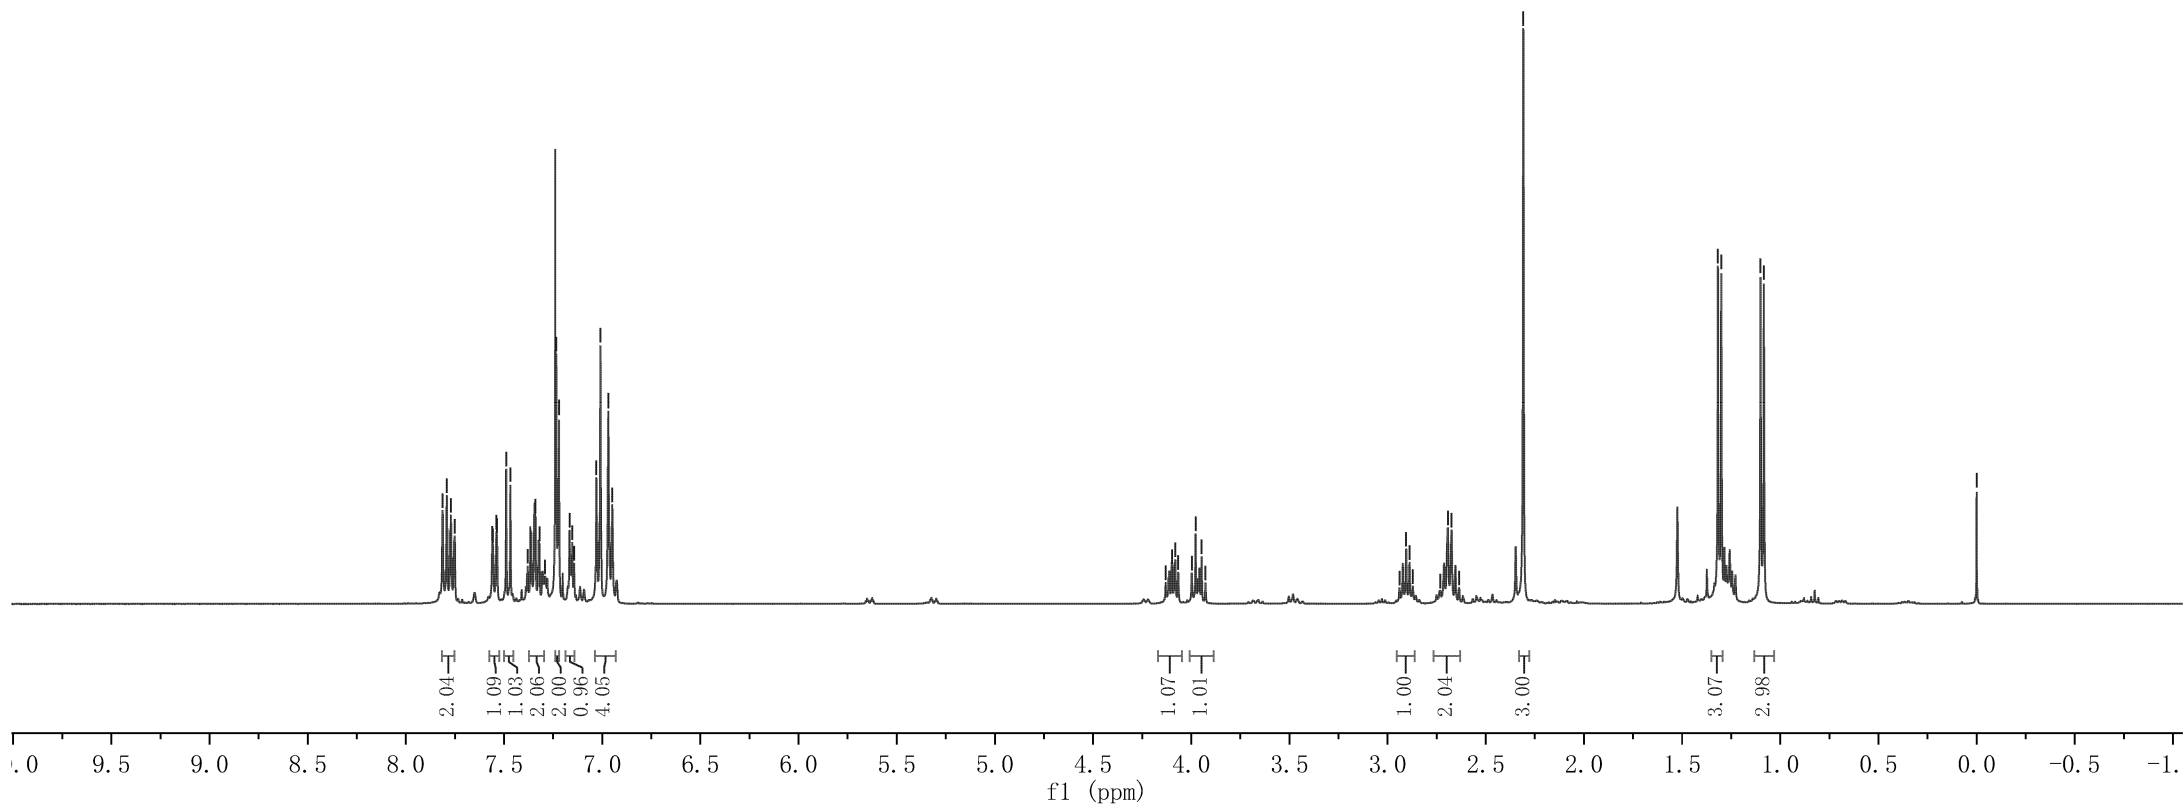

| Parameter                | Value               |
|--------------------------|---------------------|
| 1 Title                  | zzx-11-119-C        |
| 2 Origin                 | Bruker BioSpin GmbH |
| 3 Solvent                | CDC13               |
| 4 Temperature            | 300.0               |
| 5 Number of Scans        | 74                  |
| 6 Acquisition Time       | 1.3631              |
| 7 Acquisition Date       | 2020-11-14T14:30:10 |
| 8 Spectrometer Frequency | 100.61              |
| 9 Spectral Width         | 24038.5             |

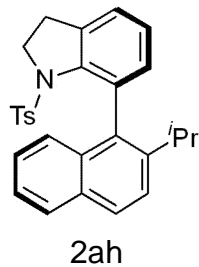

143.49  
142.93  
142.33  
137.58  
136.22  
134.24  
132.44  
132.00  
131.94  
131.75  
128.99  
127.97  
127.72  
126.80  
126.67  
125.93  
125.31  
124.54  
123.96  
123.82

77.32  
77.00  
76.68  
134.24  
132.44  
132.00  
131.94  
131.75  
52.74  
128.99  
30.79  
30.02  
25.17  
22.42  
21.43  
126.80  
126.67  
125.93  
125.31  
124.54  
123.96  
123.82

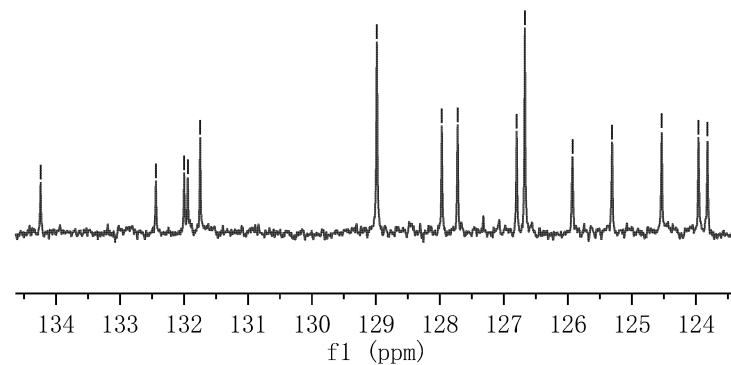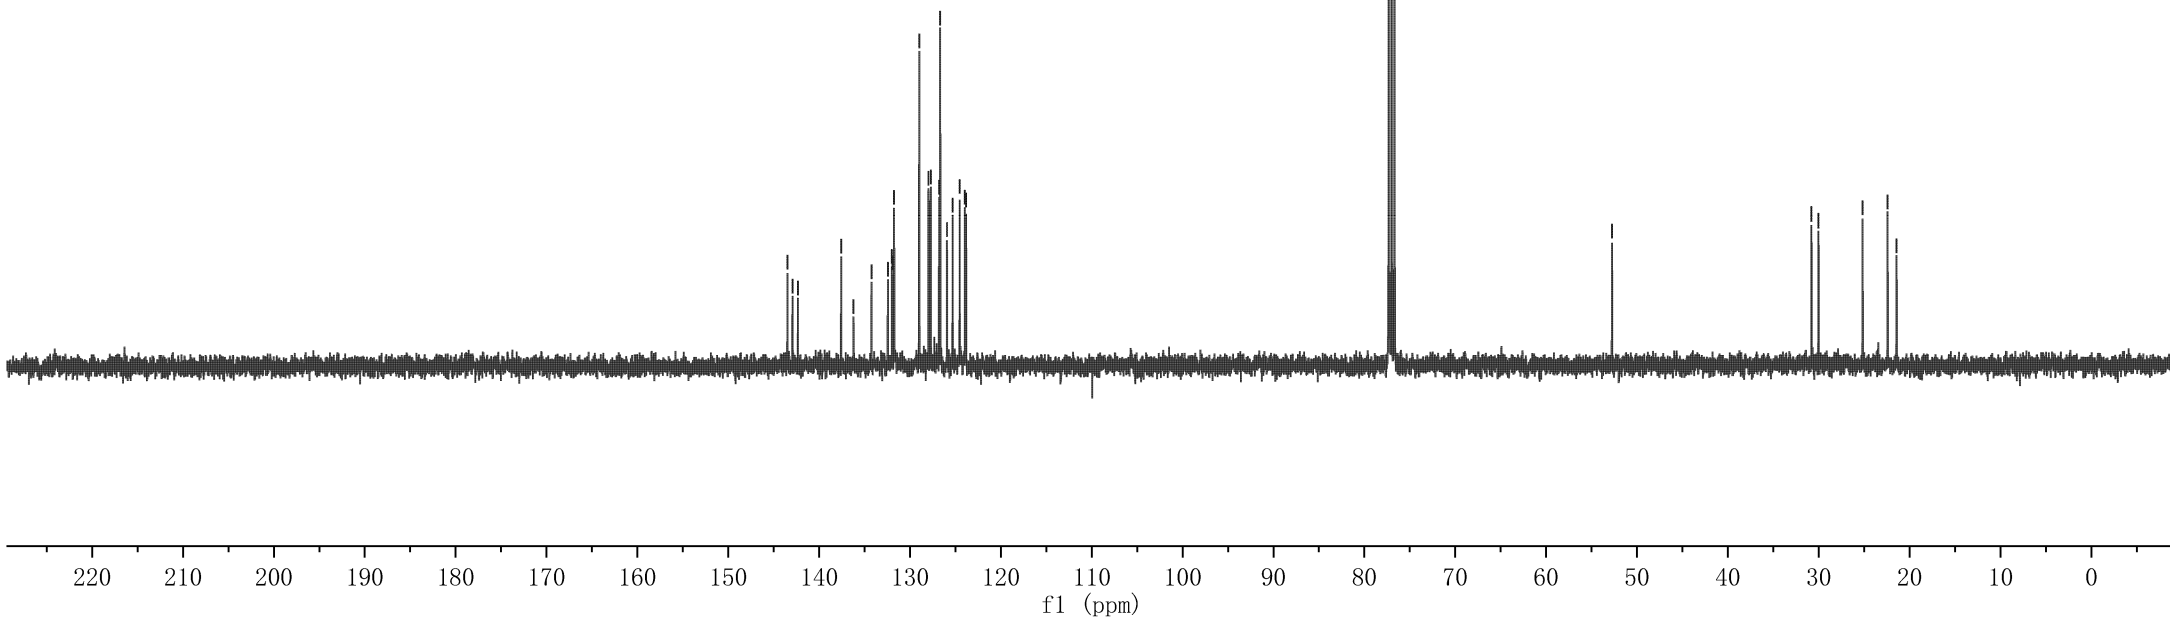

8.141  
8.131  
8.118  
7.915  
7.911  
7.903  
7.890  
7.528  
7.516  
7.502  
7.477  
7.456  
7.435  
7.397  
7.378  
7.213  
7.194  
7.175  
7.109  
7.044  
7.031  
7.010  
6.917  
6.911  
6.898  
6.894

3.775  
3.756  
3.741  
3.723

2.451  
2.422  
2.402  
2.372  
2.319  
2.289  
2.250  
2.231  
2.203  
2.144  
2.126  
2.106  
2.088

0.000

| Parameter                | Value               |
|--------------------------|---------------------|
| 1 Title                  | zzx-11-120-H        |
| 2 Origin                 | Bruker BioSpin GmbH |
| 3 Solvent                | CDCl3               |
| 4 Temperature            | 298.0               |
| 5 Number of Scans        | 4                   |
| 6 Acquisition Time       | 4.0894              |
| 7 Acquisition Date       | 2020-11-14T14:37:05 |
| 8 Spectrometer Frequency | 400.13              |
| 9 Spectral Width         | 8012.8              |

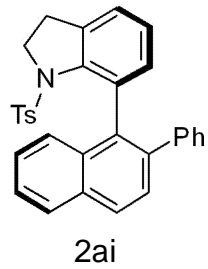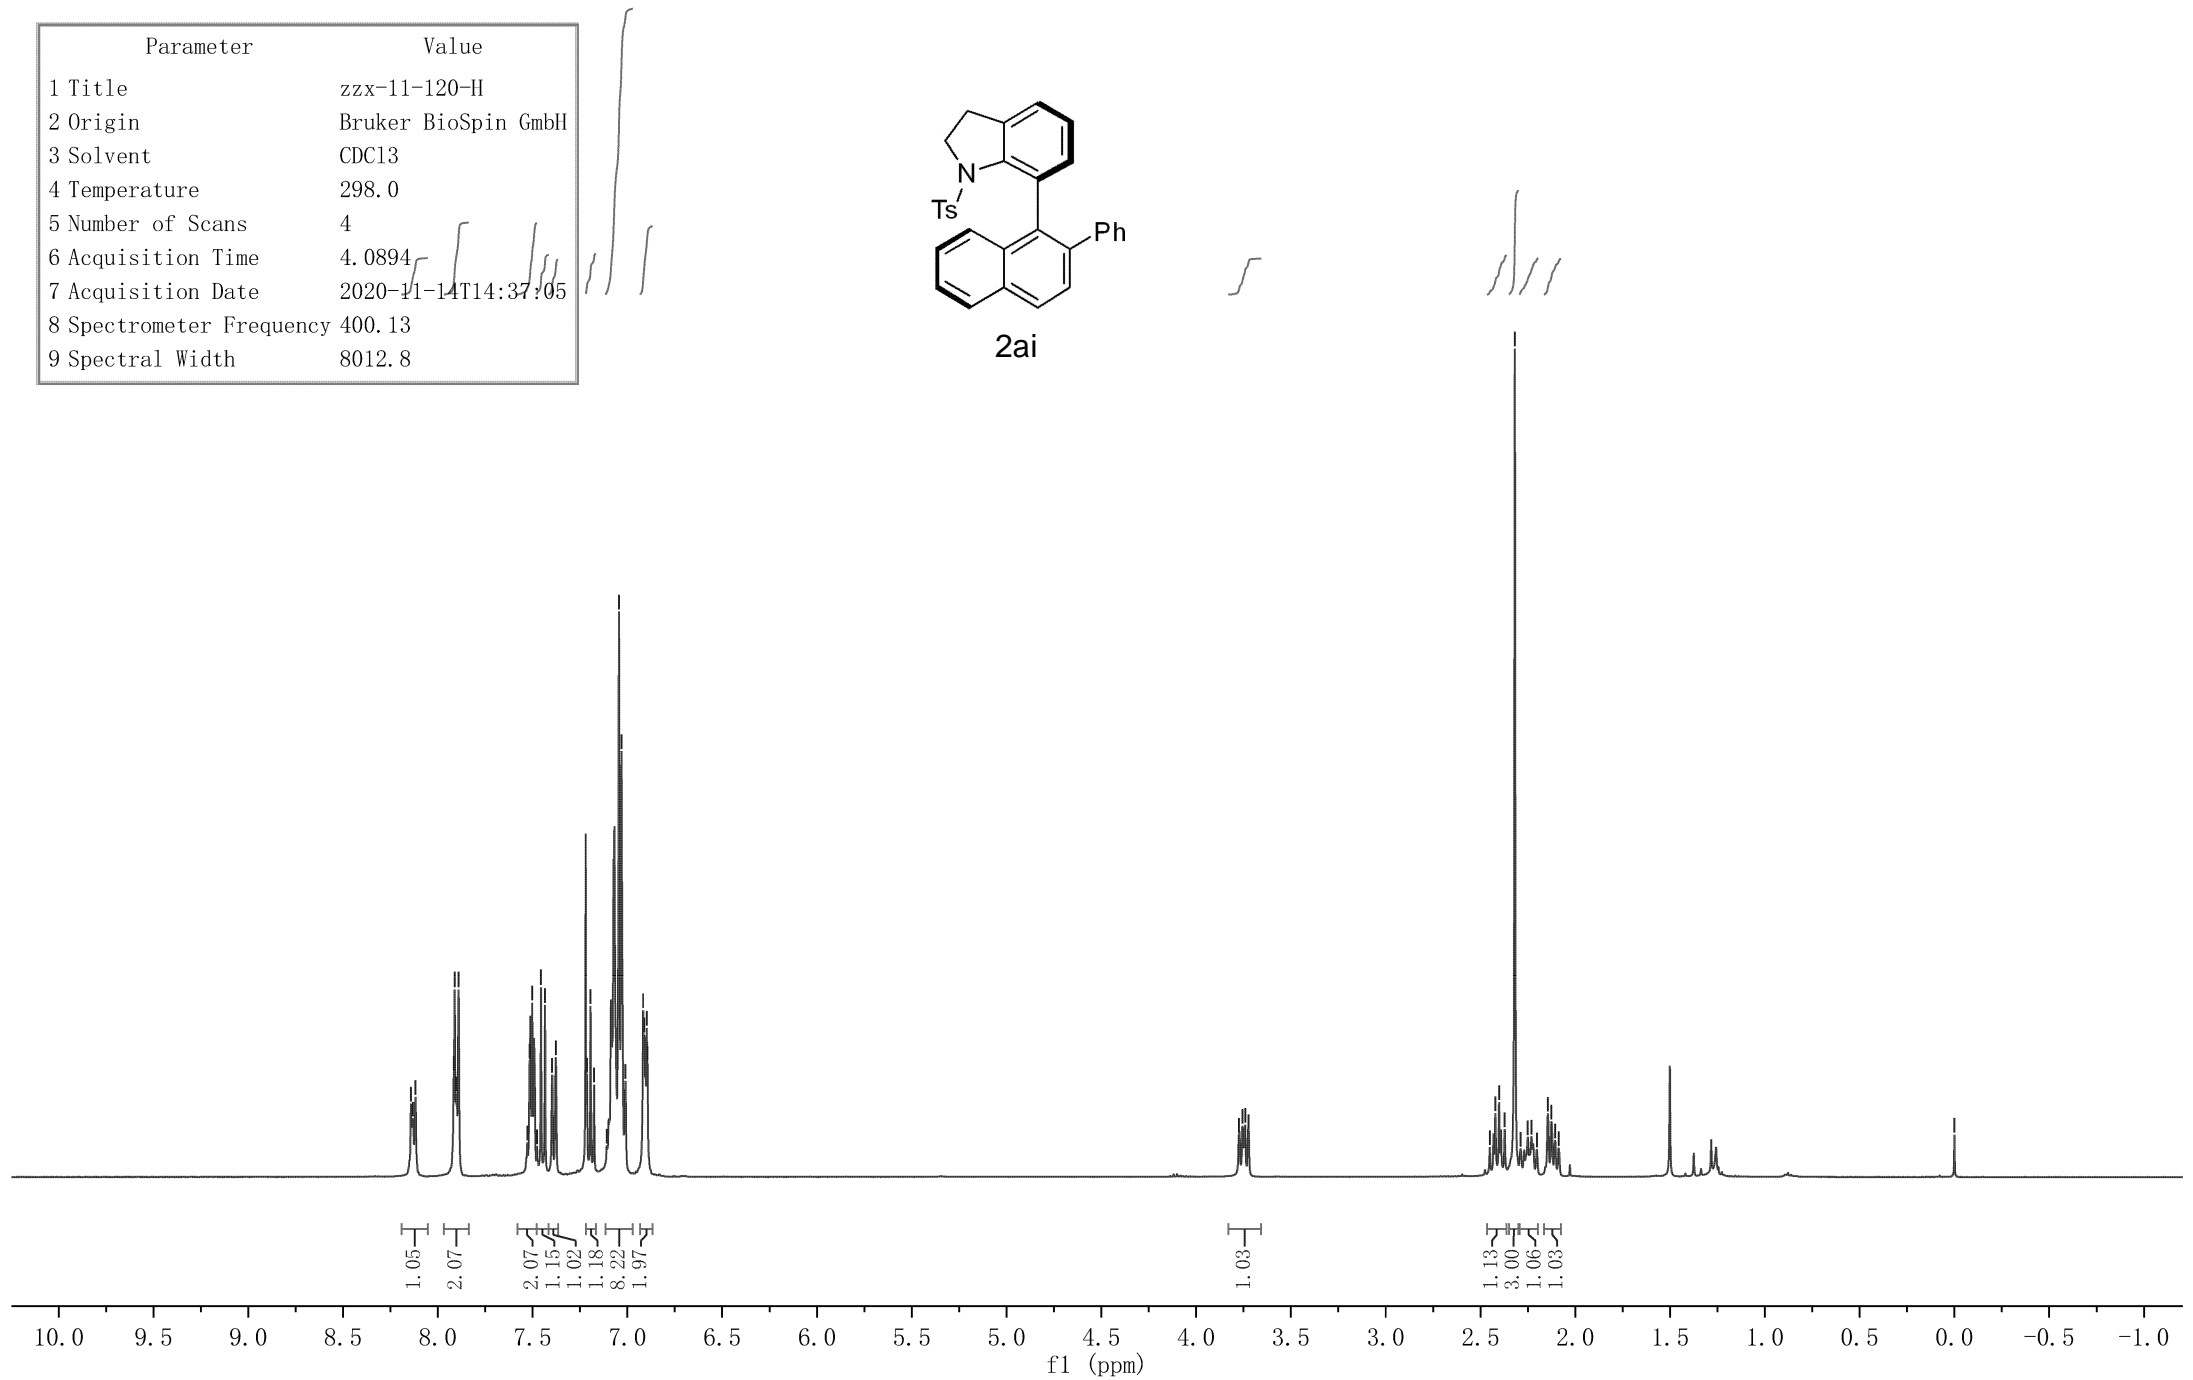

| Parameter                | Value               |
|--------------------------|---------------------|
| 1 Title                  | zzx-11-120-C        |
| 2 Origin                 | Bruker BioSpin GmbH |
| 3 Solvent                | CDC13               |
| 4 Temperature            | 300.0               |
| 5 Number of Scans        | 21                  |
| 6 Acquisition Time       | 1.3631              |
| 7 Acquisition Date       | 2020-11-14T14:38:45 |
| 8 Spectrometer Frequency | 100.61              |
| 9 Spectral Width         | 24038.5             |

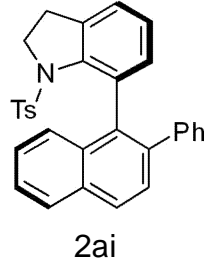

143.12  
142.63  
141.67  
138.07  
137.75  
135.91  
135.18  
132.98  
132.70  
132.22  
132.07  
129.85  
129.02  
128.18  
127.93  
127.67  
127.10  
126.99  
125.90  
125.61  
125.53  
125.48  
123.78

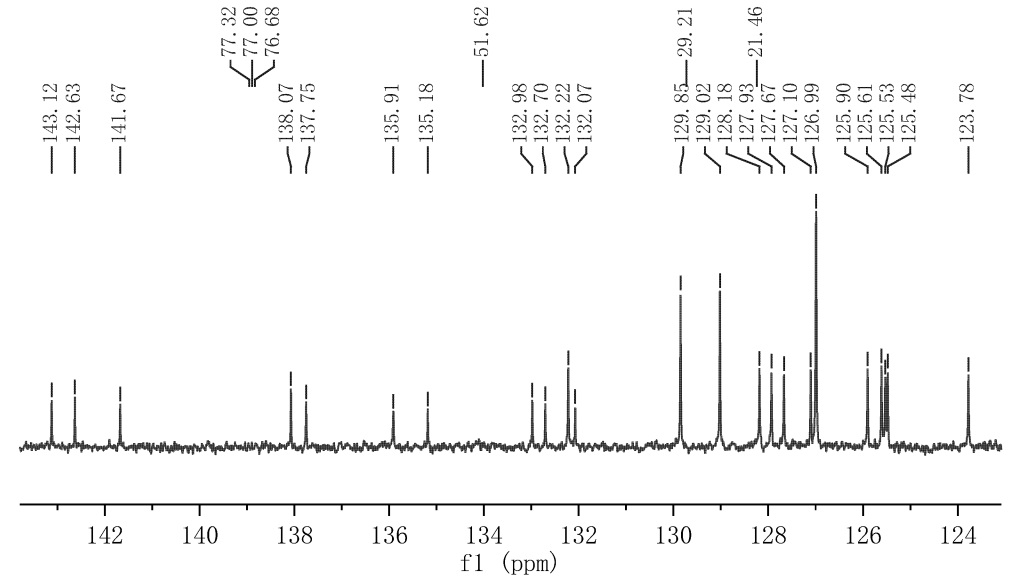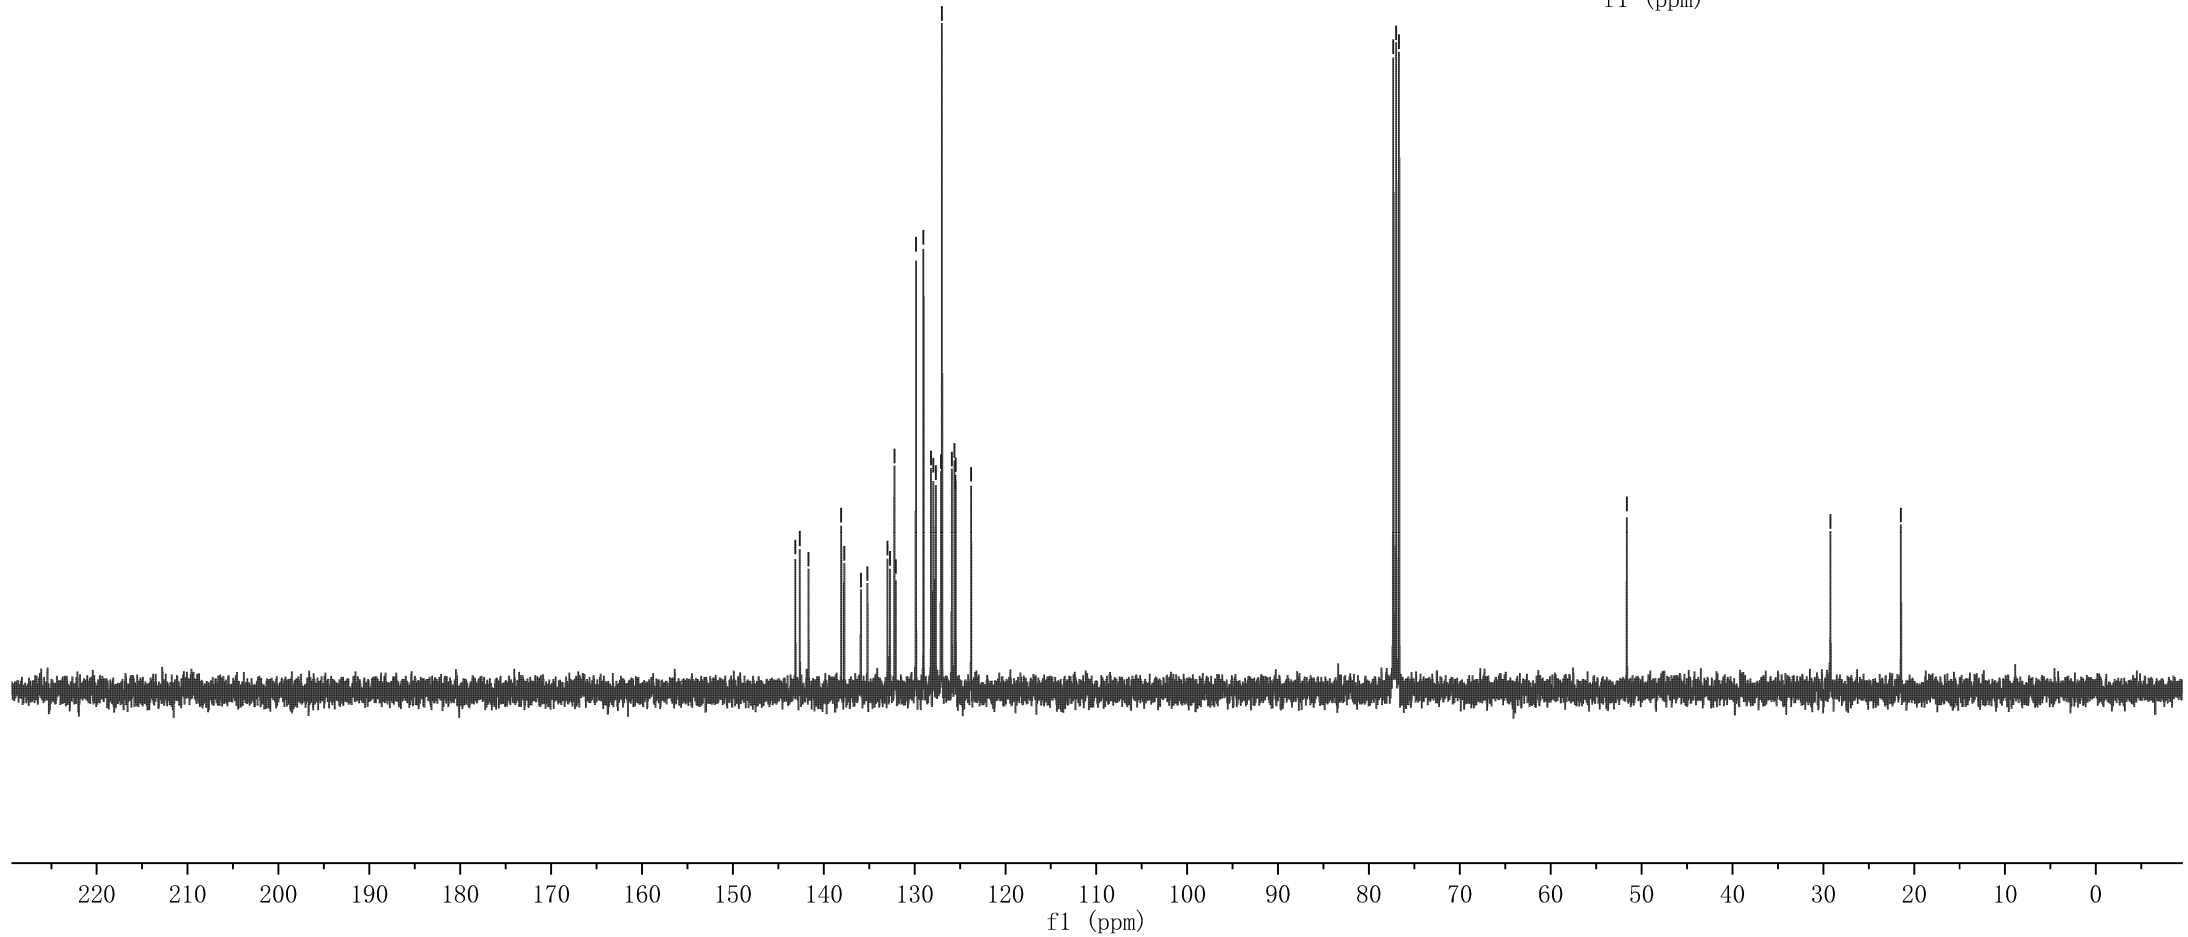

7.346  
7.326  
7.254  
7.232  
7.211  
7.154  
7.135  
7.086  
7.066  
7.043  
6.981  
6.963  
6.909  
6.888  
6.870  
6.694  
6.673

4.046  
4.014  
4.002  
3.983  
3.832  
3.765  
3.744  
3.712  
3.691

2.411  
2.344  
2.298  
2.242  
2.230  
2.222  
2.210

— 0.000

| Parameter                | Value               |
|--------------------------|---------------------|
| 1 Title                  | ZZX-11-225          |
| 2 Origin                 |                     |
| 3 Solvent                | CDC13               |
| 4 Temperature            | 297.2               |
| 5 Number of Scans        | 16                  |
| 6 Acquisition Time       | 4.0002              |
| 7 Acquisition Date       | 2022-03-19T00:12:25 |
| 8 Spectrometer Frequency | 399.93              |
| 9 Spectral Width         | 8012.0              |

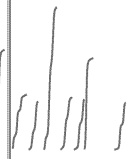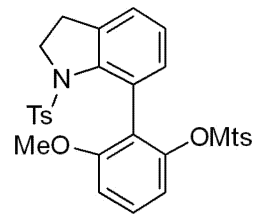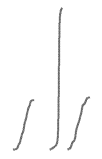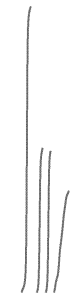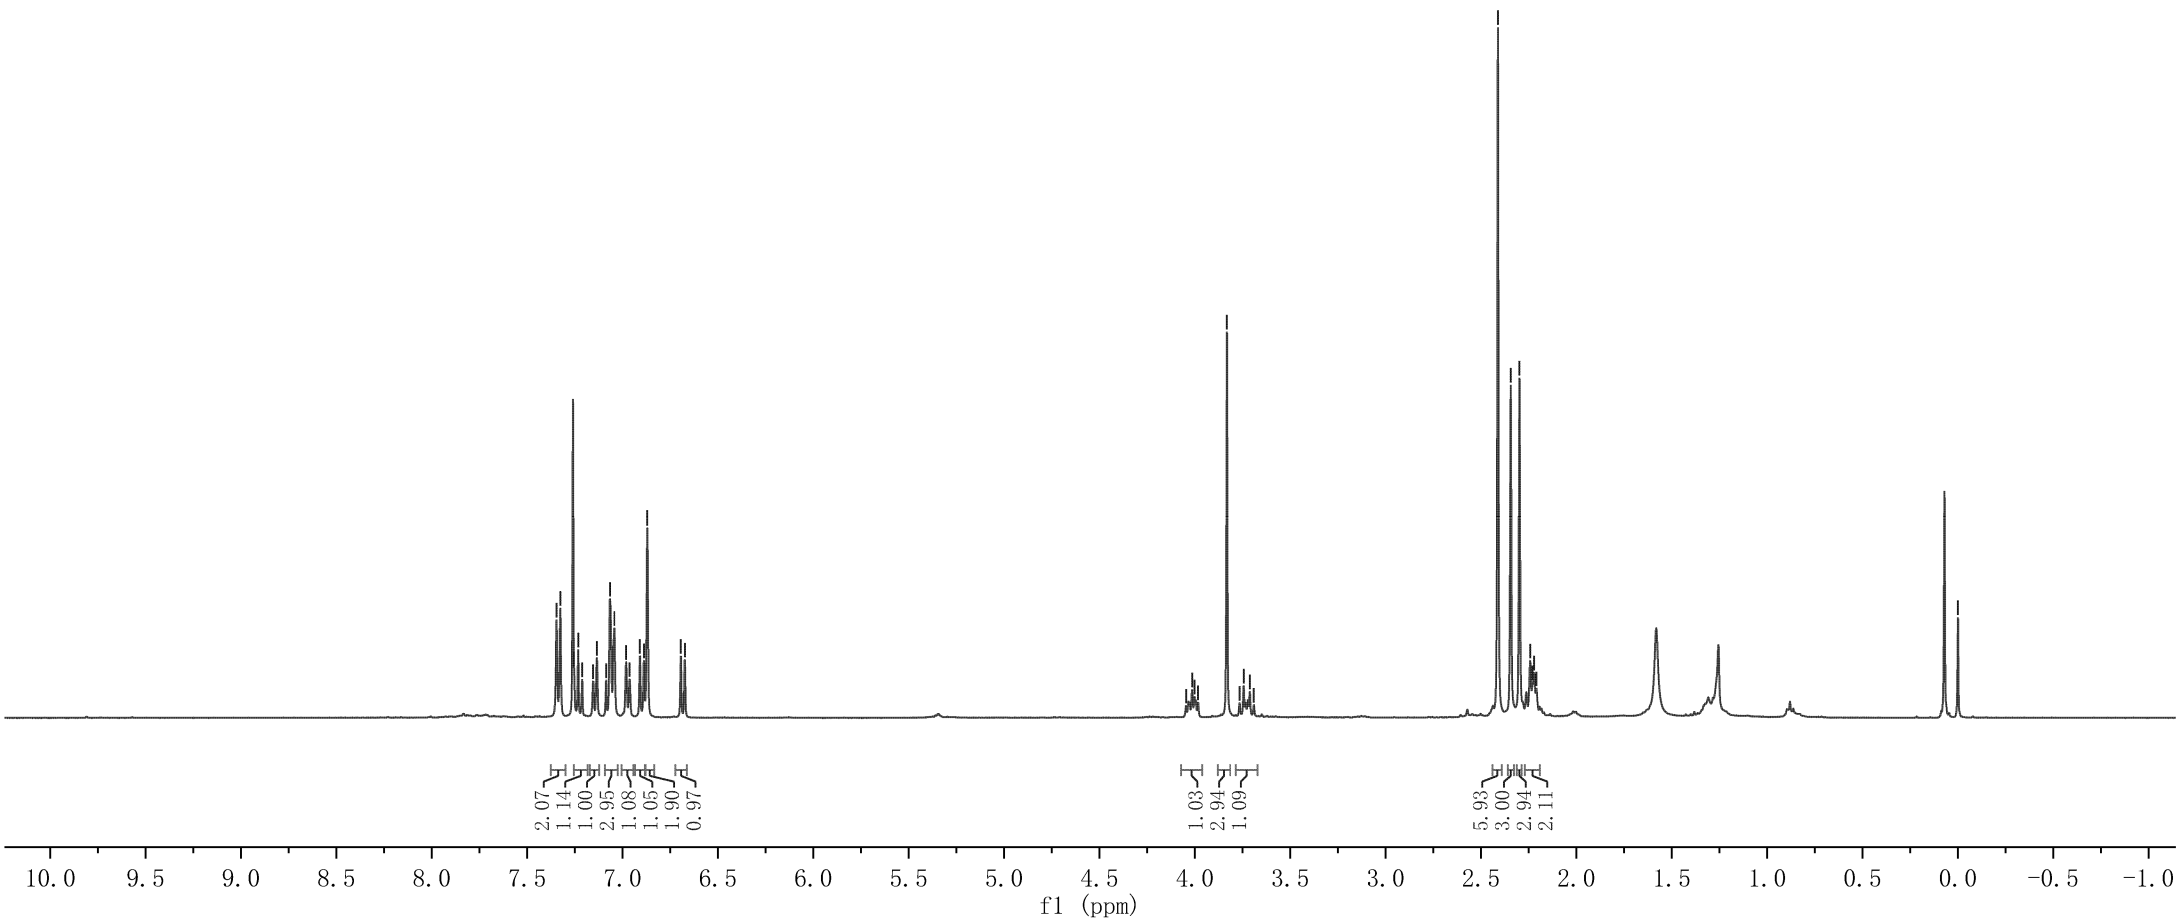

2.07  
1.14  
1.00  
2.95  
1.08  
1.05  
1.90  
0.97

1.03  
2.94  
1.09

5.93  
3.00  
2.94  
2.11

| Parameter                | Value               |
|--------------------------|---------------------|
| 1 Title                  | ZZX-11-225          |
| 2 Origin                 |                     |
| 3 Solvent                | CDC13               |
| 4 Temperature            | 297.4               |
| 5 Number of Scans        | 500                 |
| 6 Acquisition Time       | 1.0000              |
| 7 Acquisition Date       | 2022-03-19T00:29:40 |
| 8 Spectrometer Frequency | 100.56              |
| 9 Spectral Width         | 26041.0             |

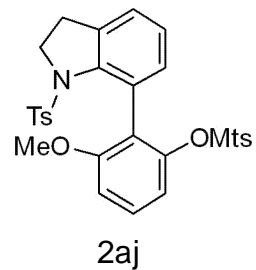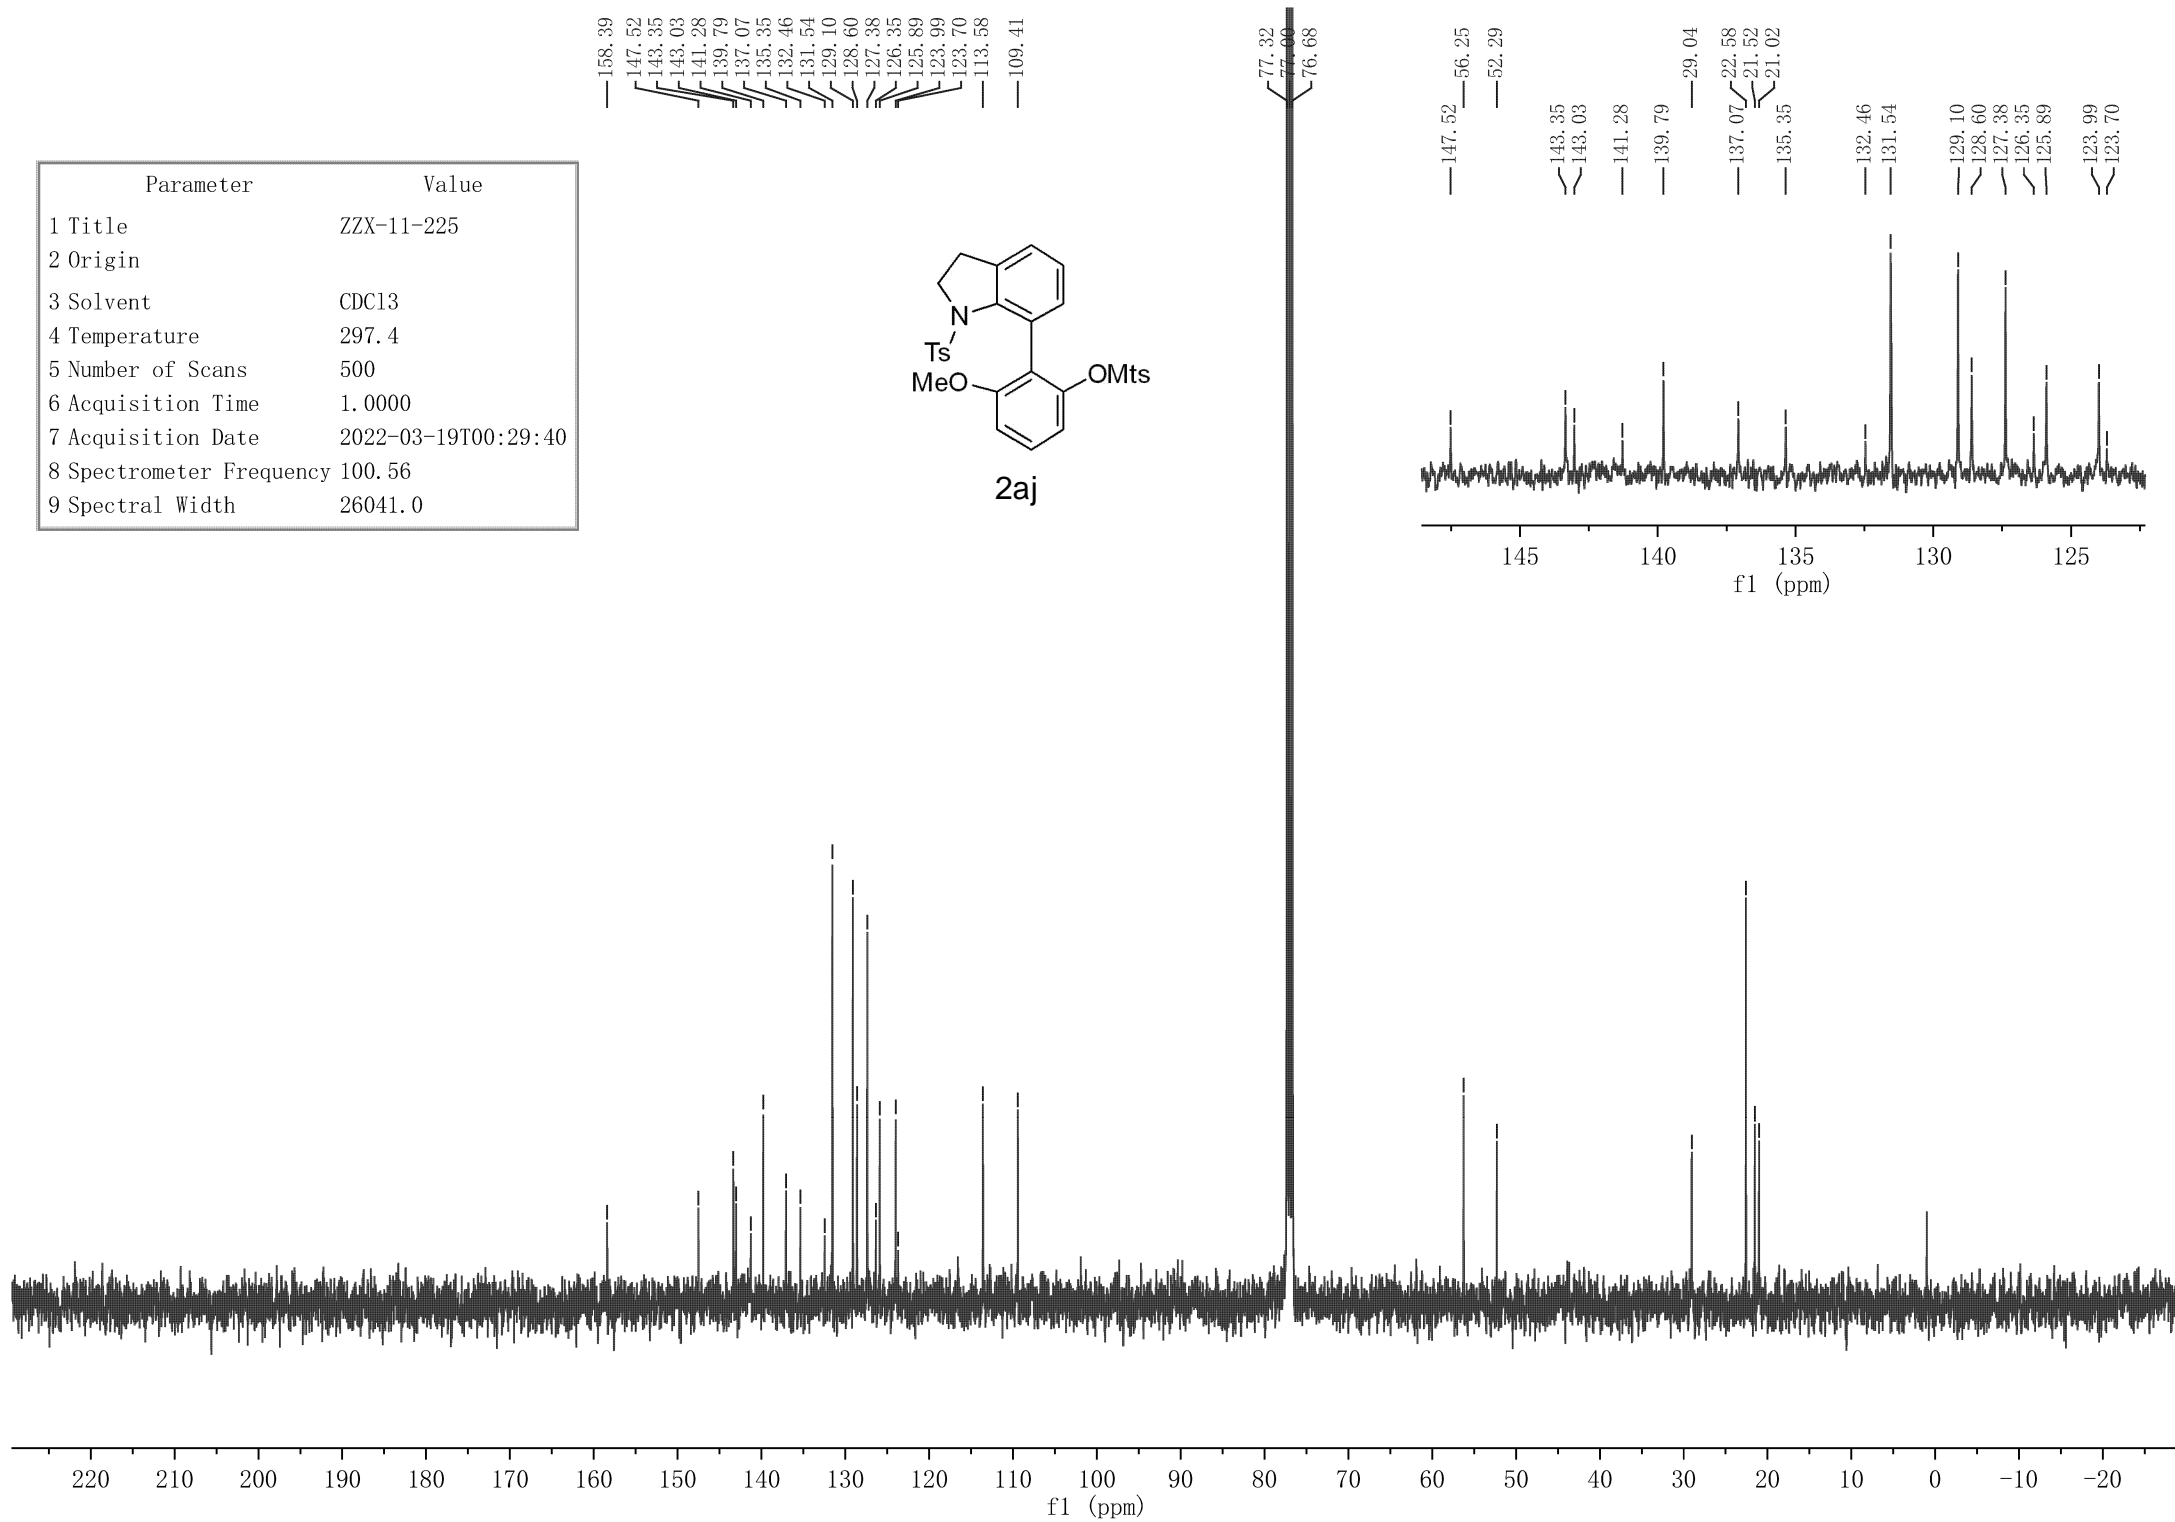

7.791  
7.771  
7.654  
7.633  
7.613  
7.584  
7.527  
7.507  
7.478  
7.420  
7.361  
7.345  
7.313  
7.172  
7.152  
6.987  
6.969  
6.910  
6.896  
6.862  
6.813  
6.794  
6.629  
6.610

3.973  
3.923  
3.888  
3.839

2.913  
2.836  
2.792  
2.777

2.366  
2.339  
2.311  
2.292  
2.206  
1.794  
1.780  
1.765  
1.700  
1.682  
1.668  
1.653

0.000

| Parameter                | Value               |
|--------------------------|---------------------|
| 1 Title                  | zzx-18-38           |
| 2 Origin                 |                     |
| 3 Solvent                | CDC13               |
| 4 Temperature            | 297.6               |
| 5 Number of Scans        | 16                  |
| 6 Acquisition Time       | 4.0002              |
| 7 Acquisition Date       | 2023-02-09T14:00:08 |
| 8 Spectrometer Frequency | 399.90              |
| 9 Spectral Width         | 8012.0              |

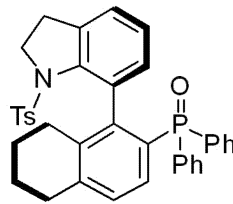

4

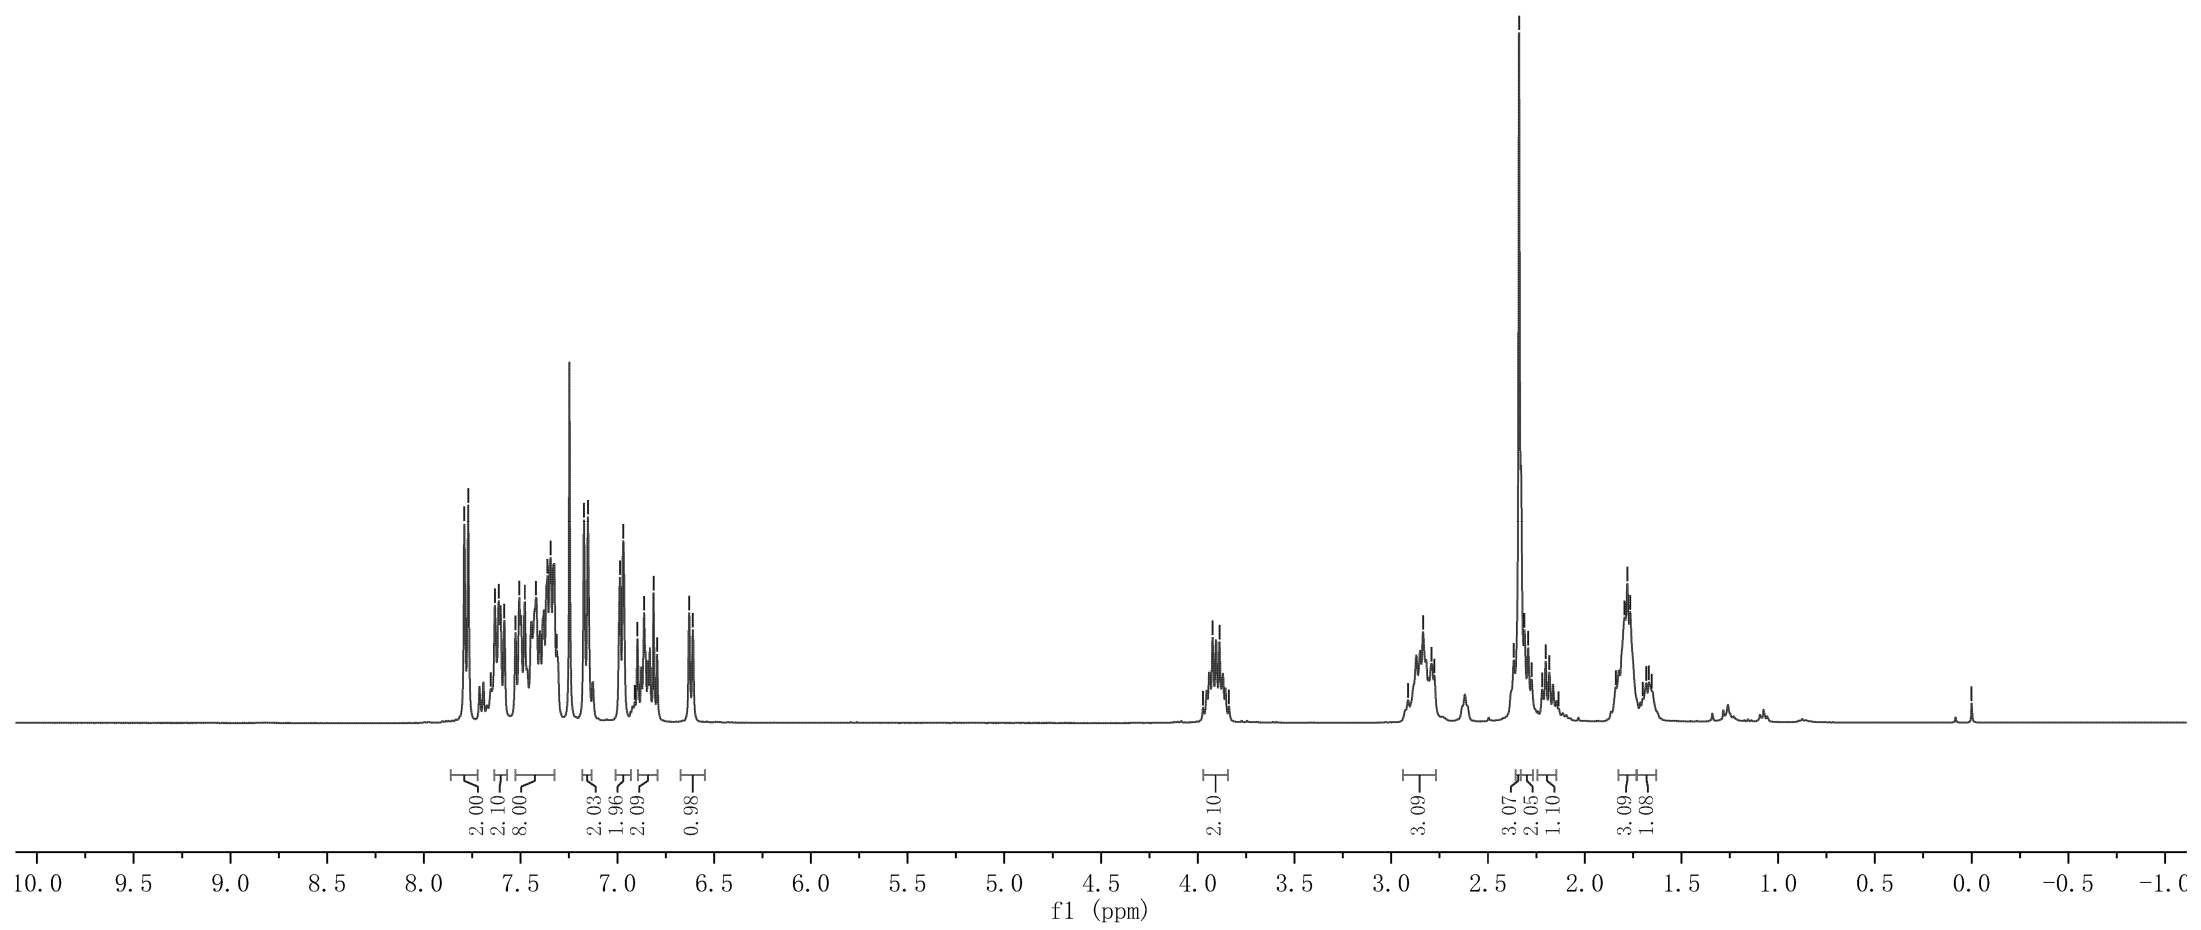

| Parameter                | Value               |
|--------------------------|---------------------|
| 1 Title                  | zzx-18-38           |
| 2 Origin                 |                     |
| 3 Solvent                | CDC13               |
| 4 Temperature            | 297.6               |
| 5 Number of Scans        | 600                 |
| 6 Acquisition Time       | 1.0000              |
| 7 Acquisition Date       | 2023-02-09T14:22:52 |
| 8 Spectrometer Frequency | 100.56              |
| 9 Spectral Width         | 26041.0             |

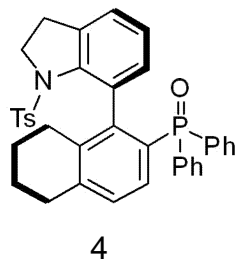

144.24  
144.17  
142.92  
141.27  
141.14  
137.84  
137.74  
137.25  
135.93  
135.44  
134.42  
132.20  
132.10  
131.78  
131.68  
130.89  
130.80  
130.67  
130.47  
129.26  
129.17  
128.02  
127.91  
127.82  
127.62  
127.31  
127.17  
126.57  
125.01  
123.79

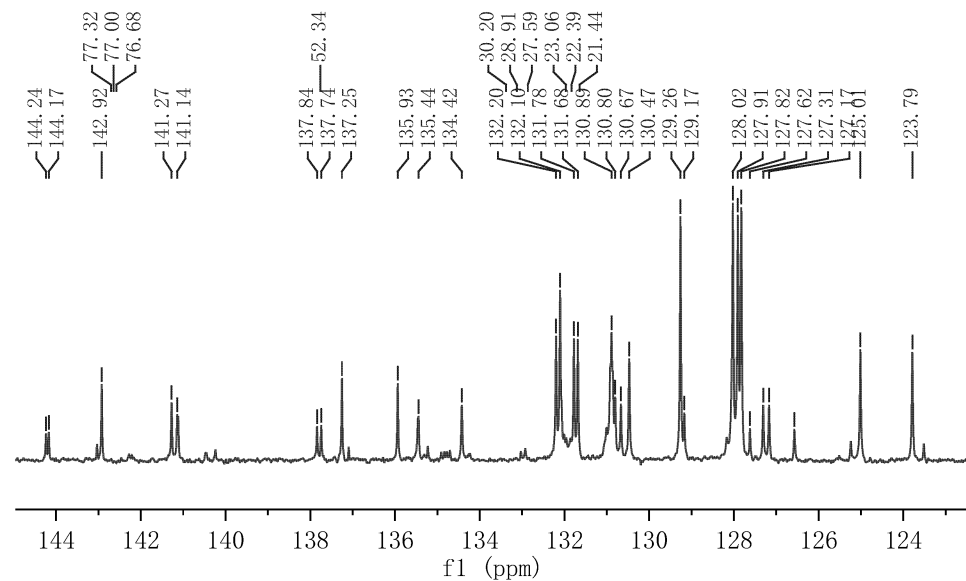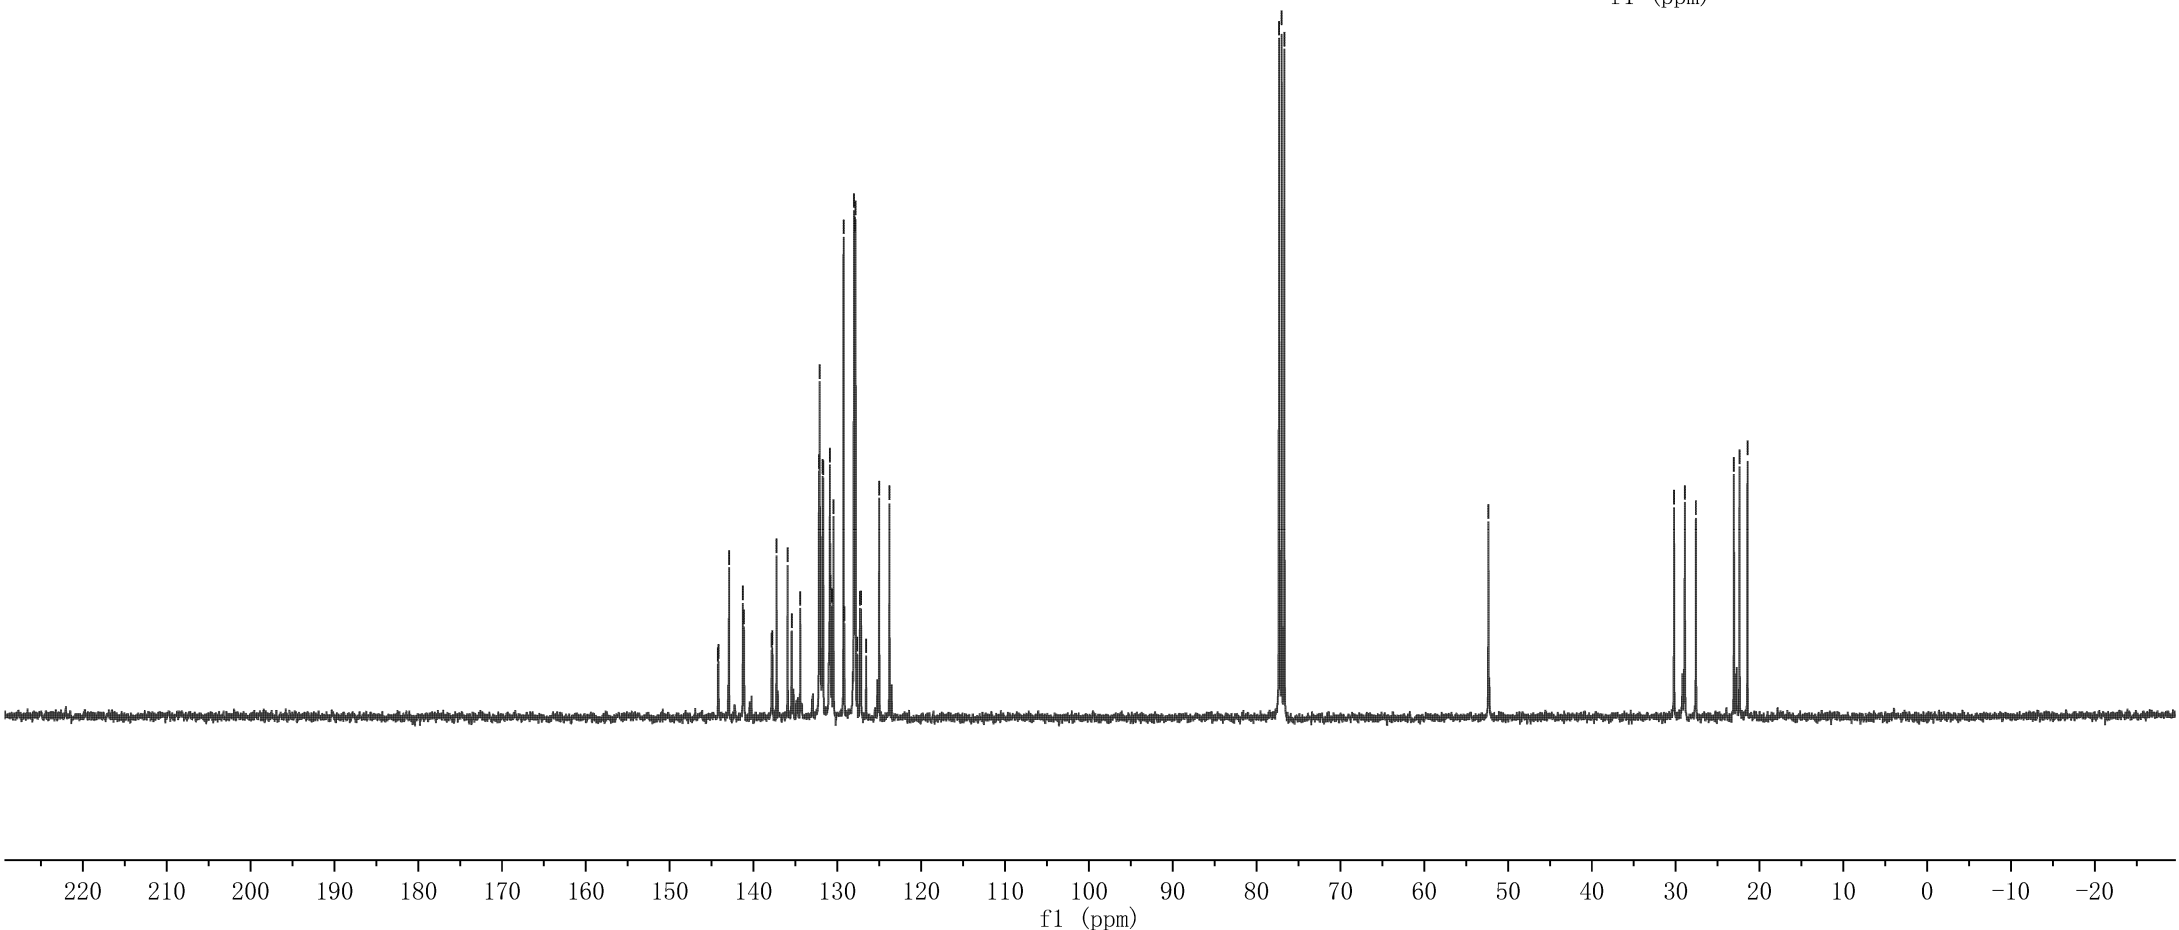



| Parameter                | Value               |
|--------------------------|---------------------|
| 1 Title                  | zzx-15-229-dept     |
| 2 Origin                 | Bruker BioSpin GmbH |
| 3 Solvent                | CDC13               |
| 4 Temperature            | 300.0               |
| 5 Number of Scans        | 34                  |
| 6 Acquisition Time       | 1.3631              |
| 7 Acquisition Date       | 2022-04-19T20:25:25 |
| 8 Spectrometer Frequency | 100.61              |
| 9 Spectral Width         | 24038.5             |

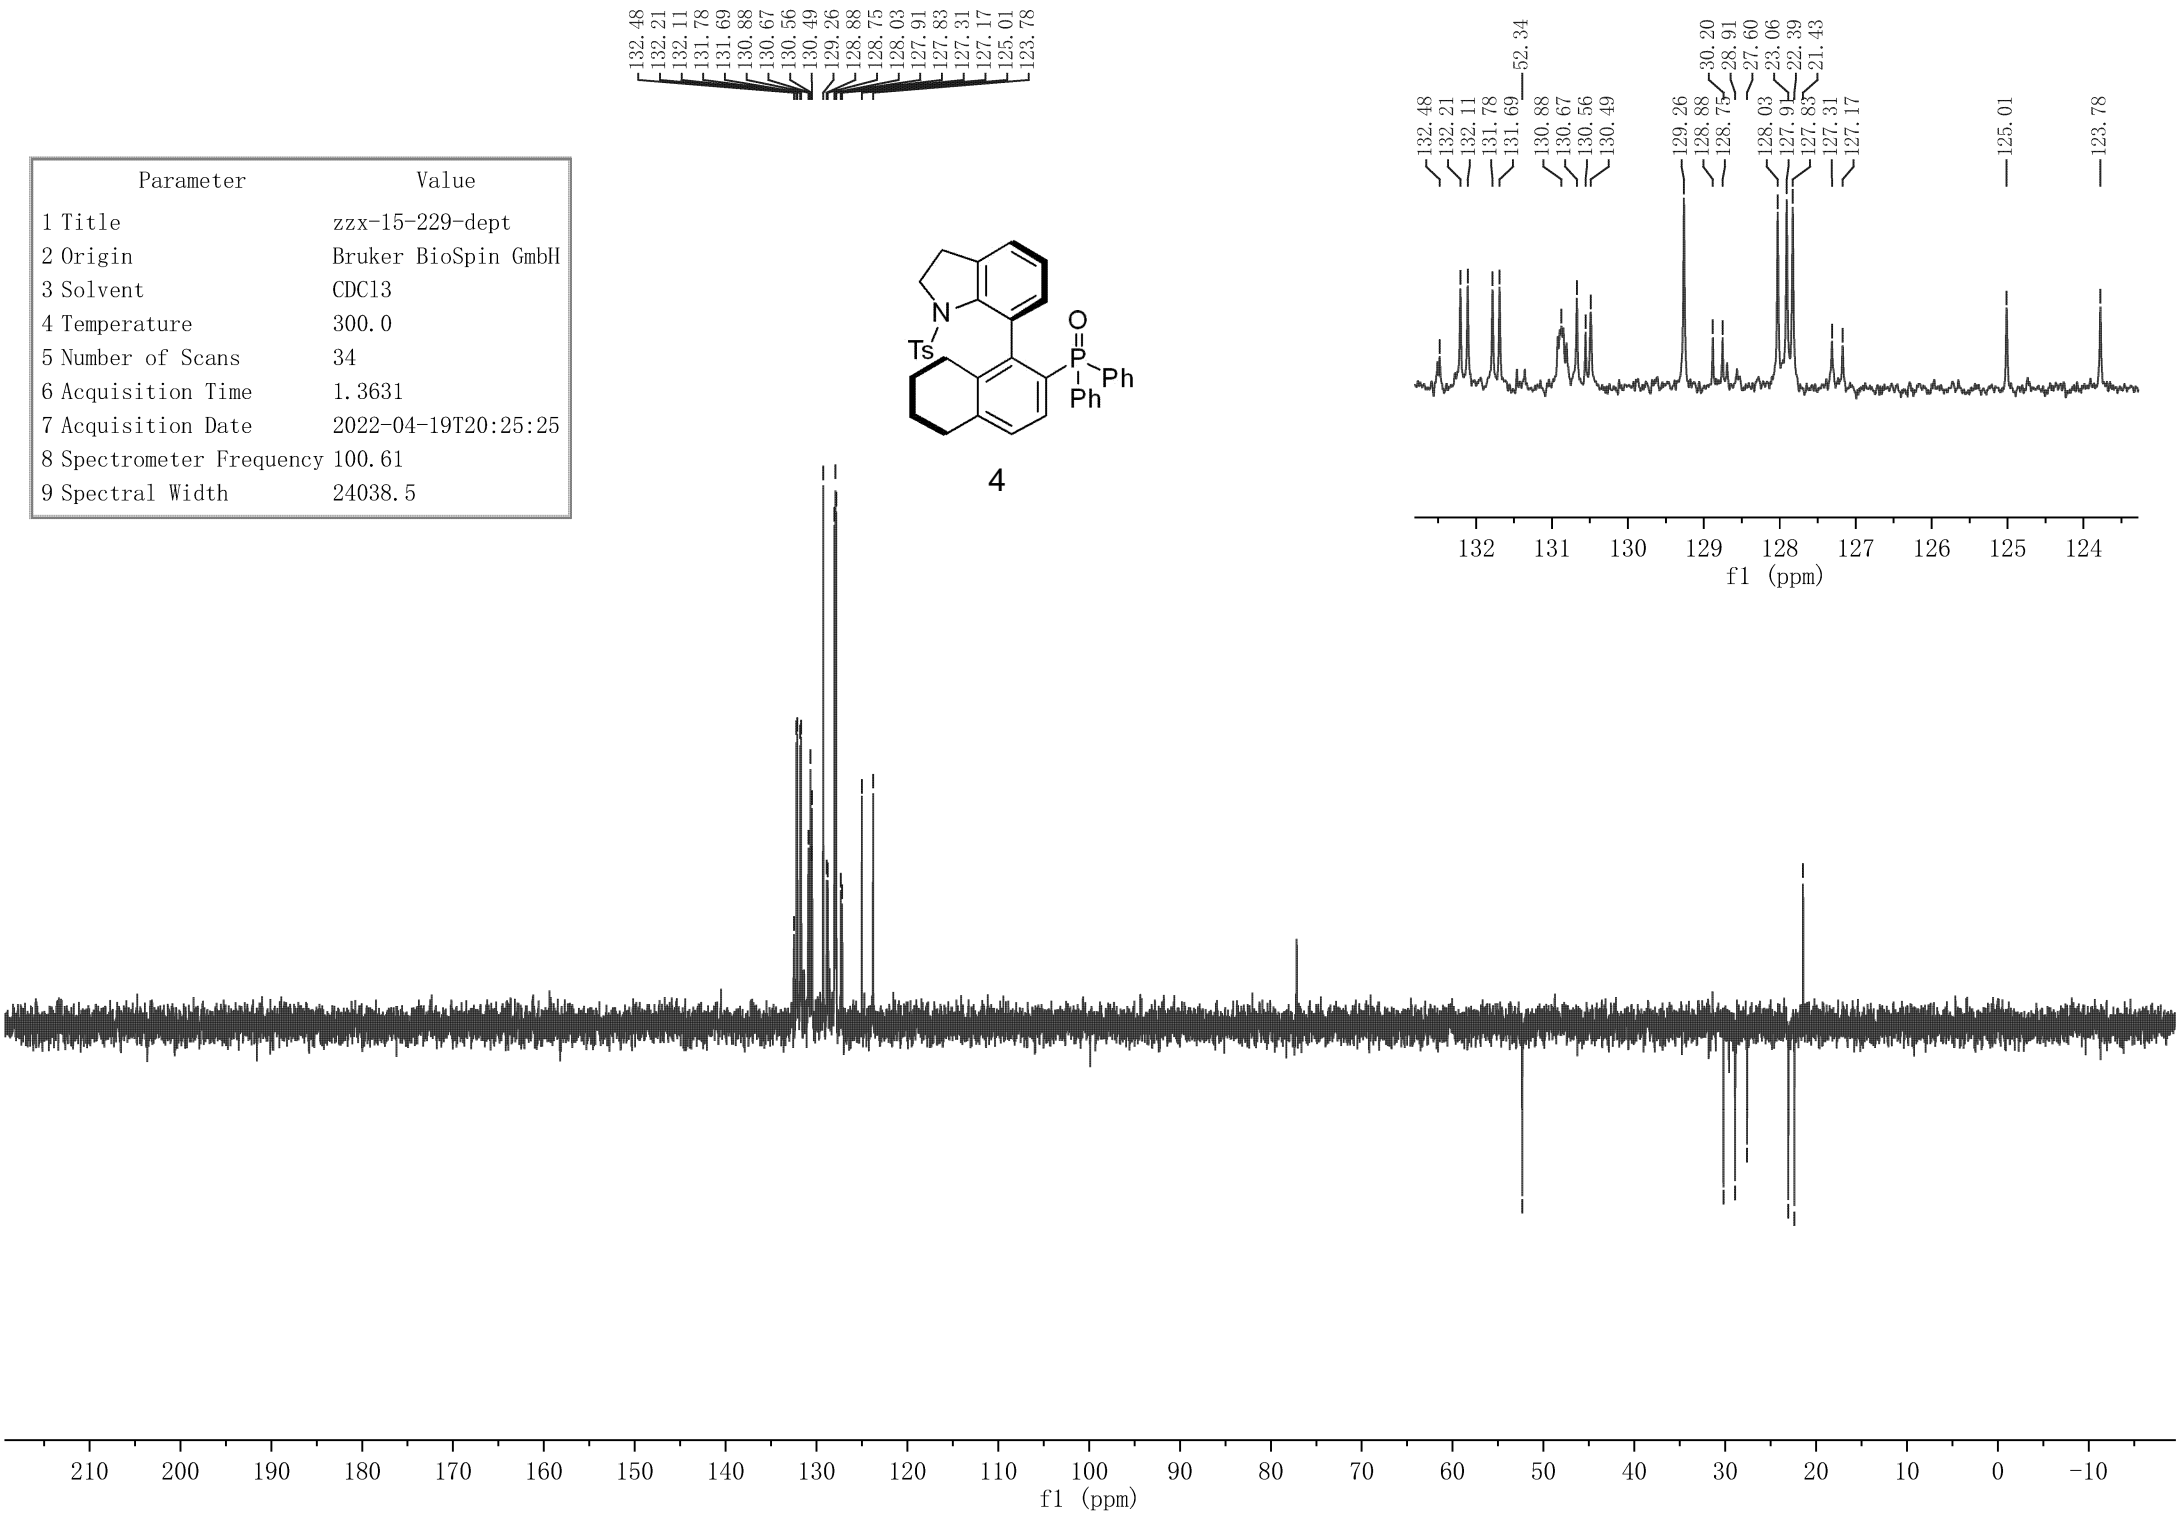

| Parameter                | Value               |
|--------------------------|---------------------|
| 1 Title                  | ZZX-15-229          |
| 2 Origin                 |                     |
| 3 Solvent                | CDC13               |
| 4 Temperature            | 297.8               |
| 5 Number of Scans        | 32                  |
| 6 Acquisition Time       | 1.0000              |
| 7 Acquisition Date       | 2022-04-19T22:16:22 |
| 8 Spectrometer Frequency | 161.89              |
| 9 Spectral Width         | 66371.0             |

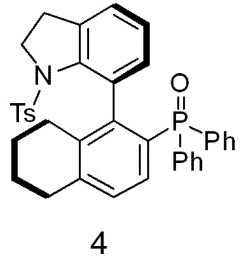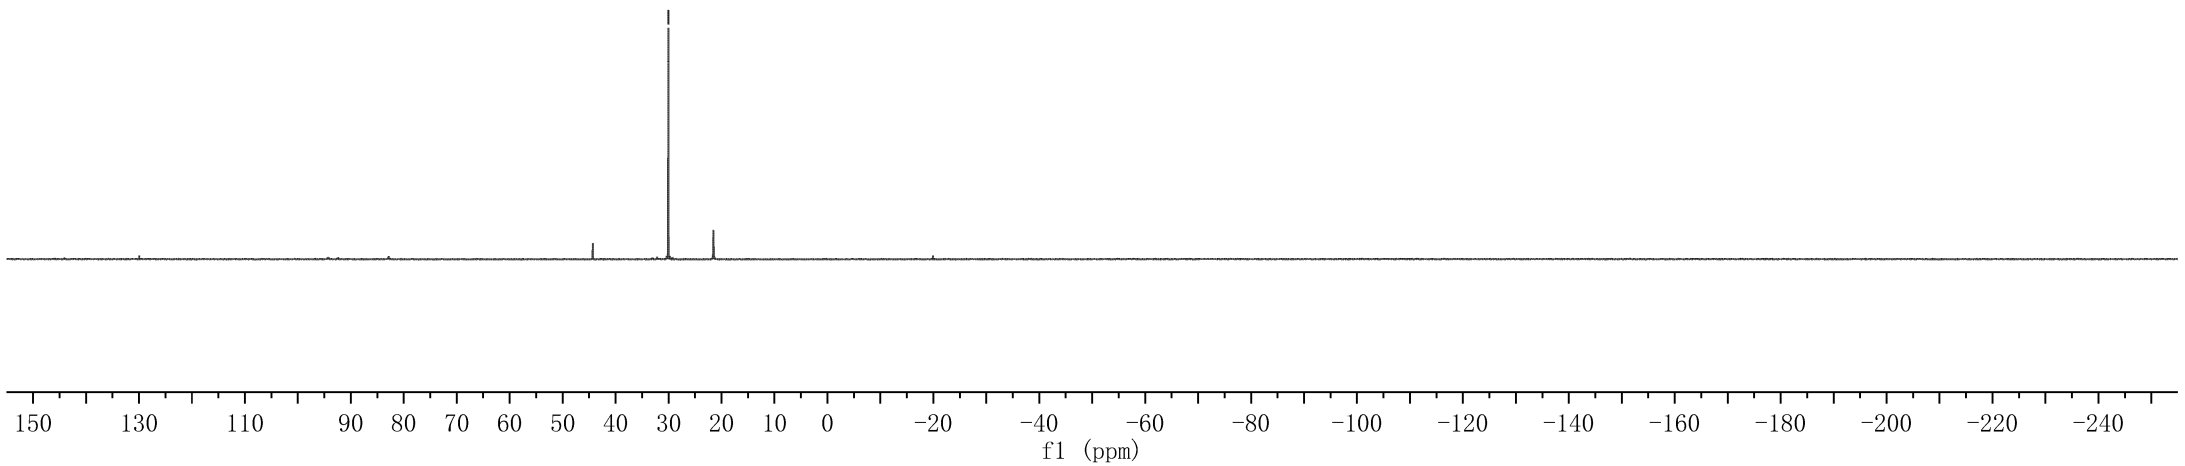

| Parameter                | Value               |
|--------------------------|---------------------|
| 1 Title                  | zzx-8-48-H          |
| 2 Origin                 | Bruker BioSpin GmbH |
| 3 Solvent                | CDC13               |
| 4 Temperature            | 298.0               |
| 5 Number of Scans        | 10                  |
| 6 Acquisition Time       | 4.0894              |
| 7 Acquisition Date       | 2023-02-19T20:07:14 |
| 8 Spectrometer Frequency | 400.13              |
| 9 Spectral Width         | 8012.8              |

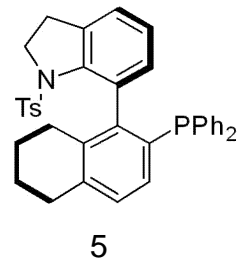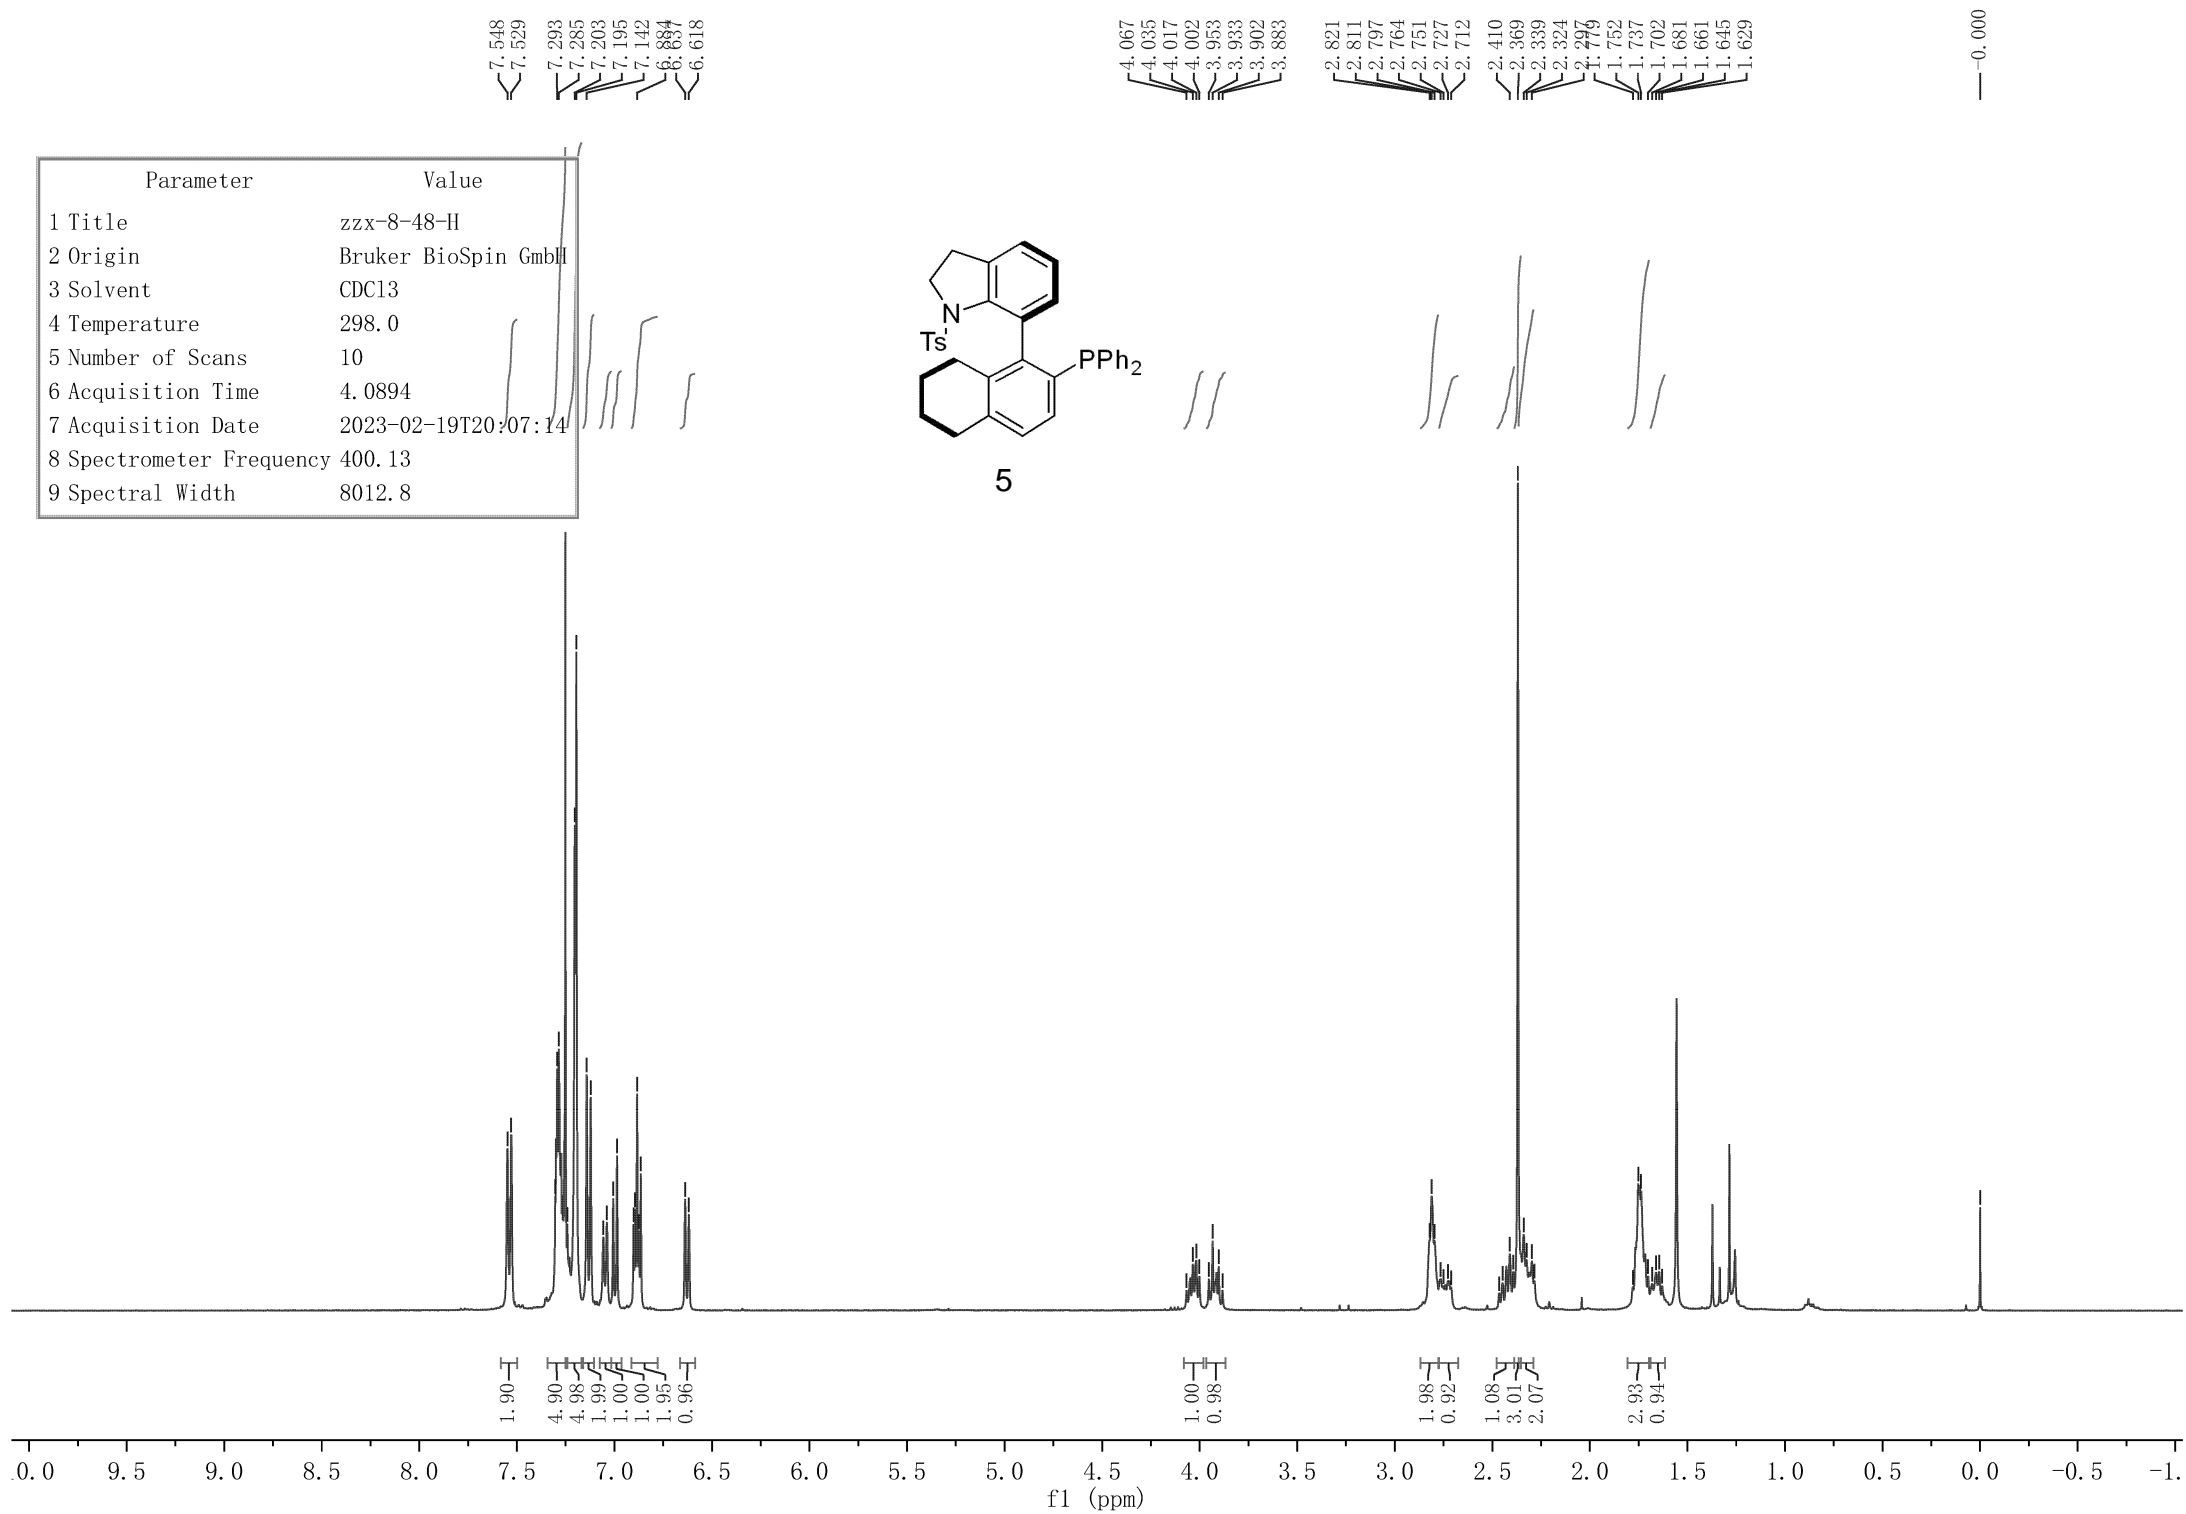

| Parameter                | Value               |
|--------------------------|---------------------|
| 1 Title                  | ZZX-18-48-C         |
| 2 Origin                 |                     |
| 3 Solvent                | CDC13               |
| 4 Temperature            | 297.1               |
| 5 Number of Scans        | 2000                |
| 6 Acquisition Time       | 1.0000              |
| 7 Acquisition Date       | 2023-02-19T23:06:50 |
| 8 Spectrometer Frequency | 100.56              |
| 9 Spectral Width         | 26041.0             |

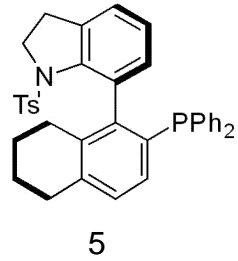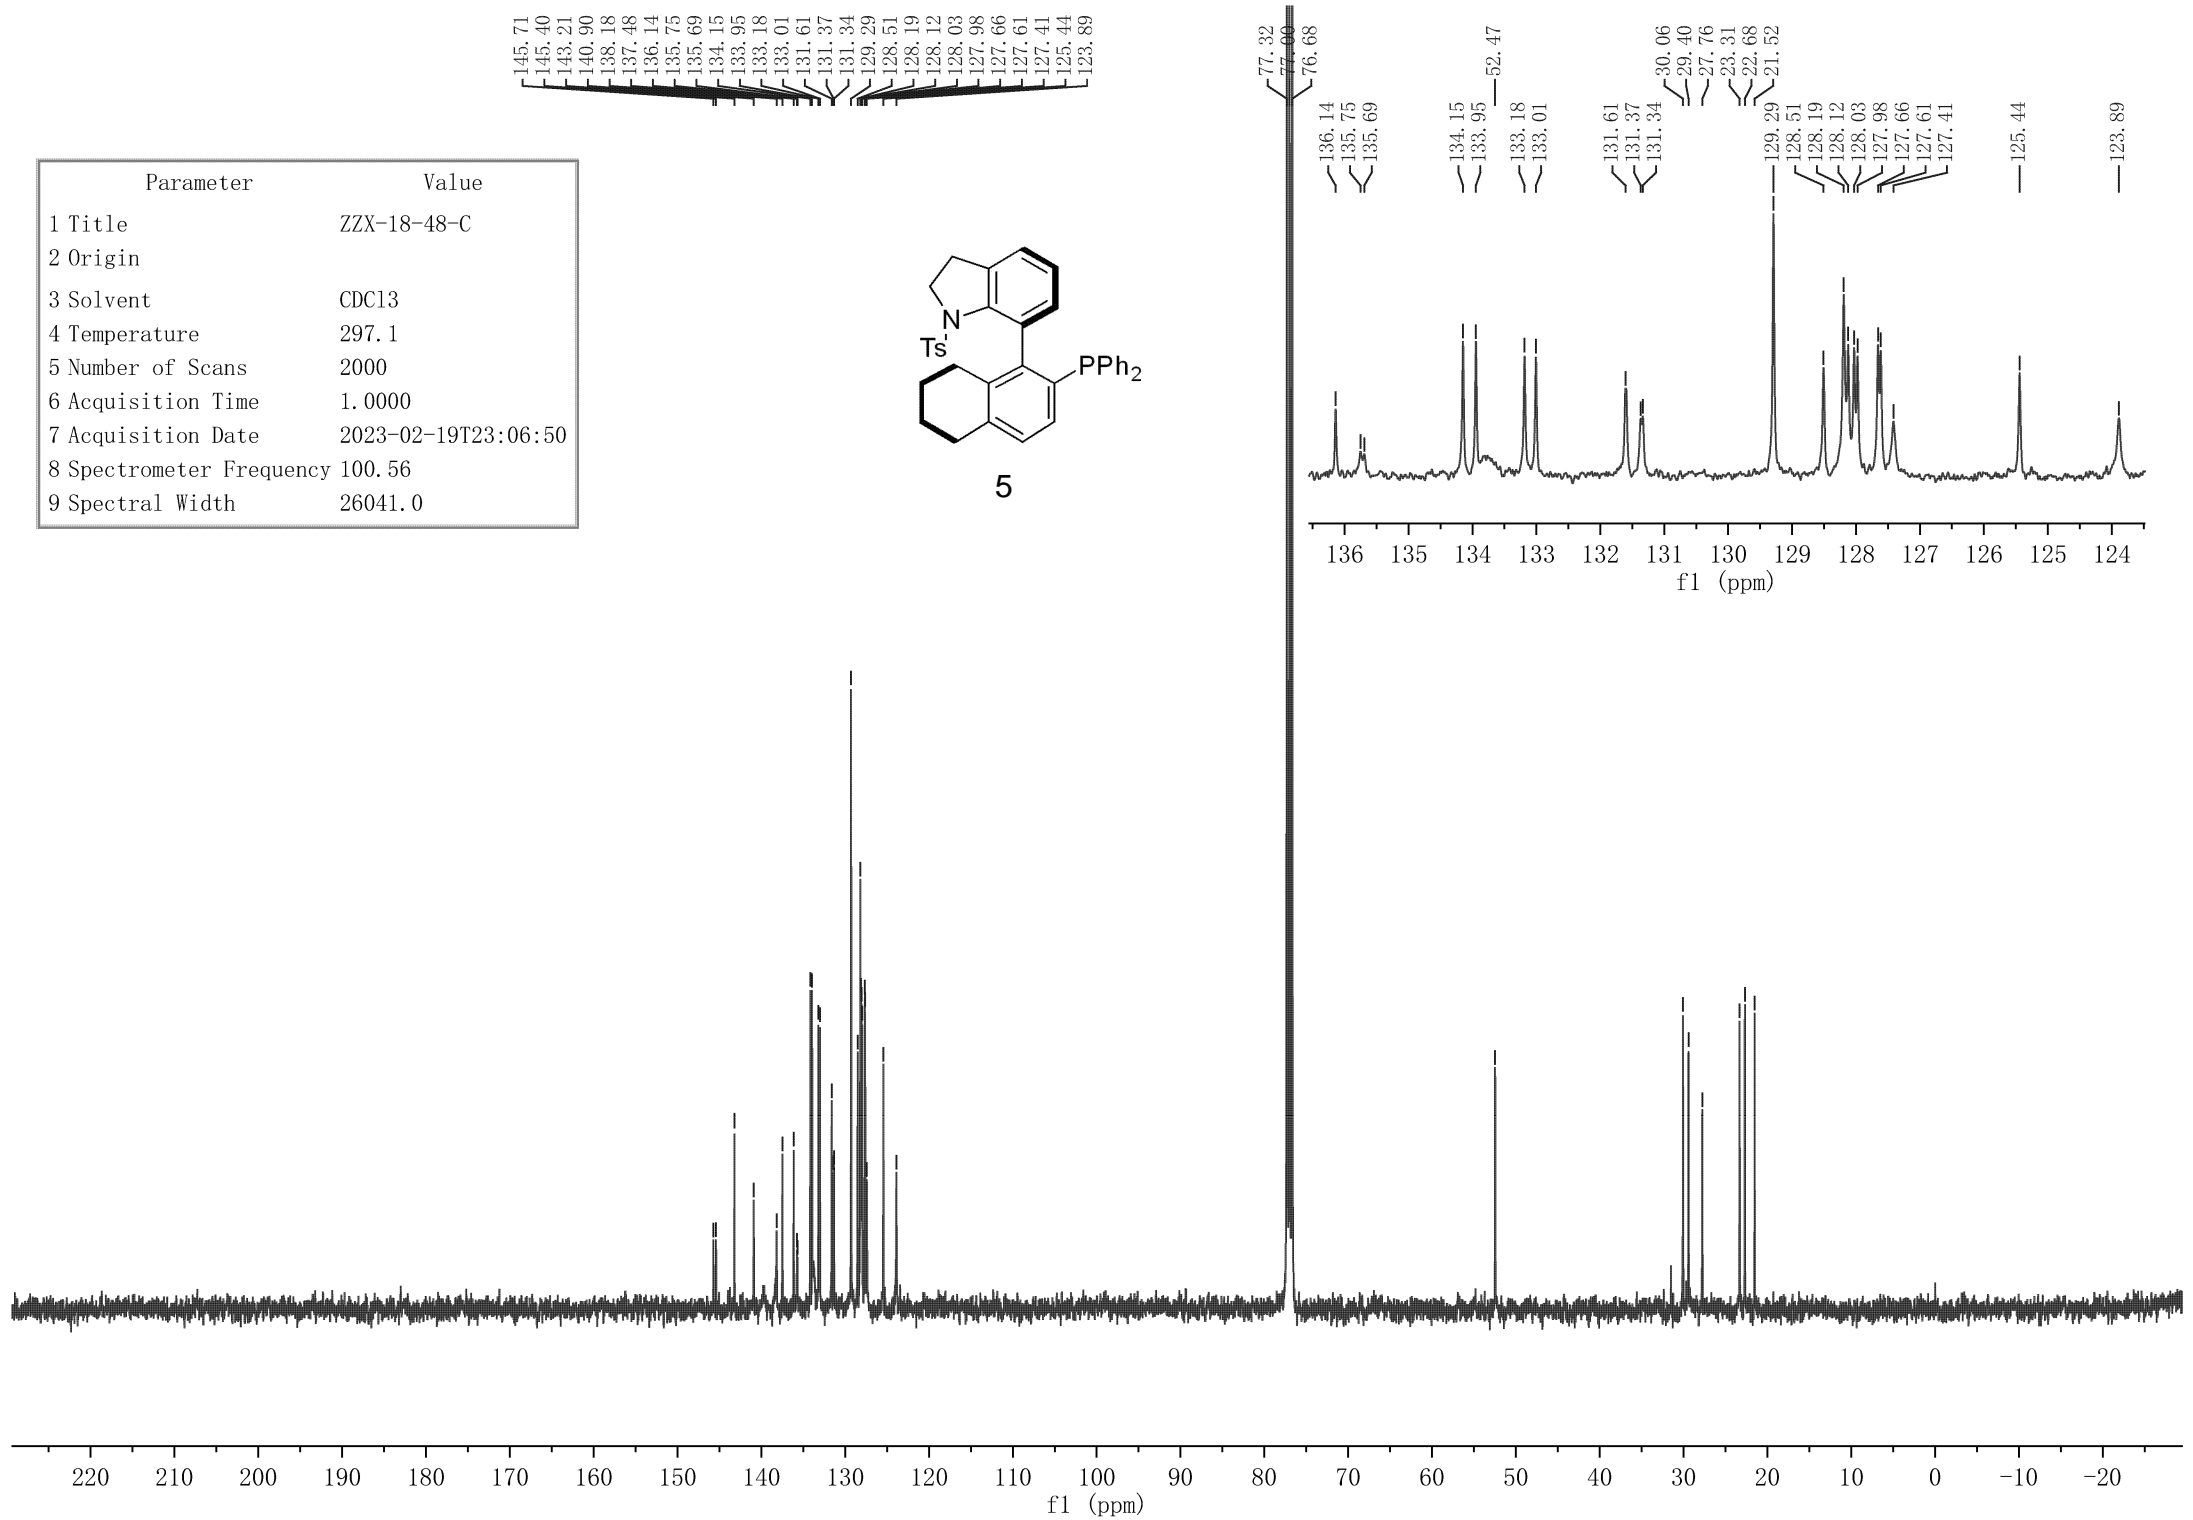

| Parameter                | Value               |
|--------------------------|---------------------|
| 1 Title                  | zzx-8-48-dept       |
| 2 Origin                 | Bruker BioSpin GmbH |
| 3 Solvent                | CDC13               |
| 4 Temperature            | 300.0               |
| 5 Number of Scans        | 86                  |
| 6 Acquisition Time       | 1.3631              |
| 7 Acquisition Date       | 2023-02-19T20:13:49 |
| 8 Spectrometer Frequency | 100.61              |
| 9 Spectral Width         | 24038.5             |

134.14  
133.94  
133.19  
133.01  
131.57  
131.33  
129.27  
128.49  
128.17  
128.10  
128.02  
127.96  
127.65  
127.60  
125.42  
123.87

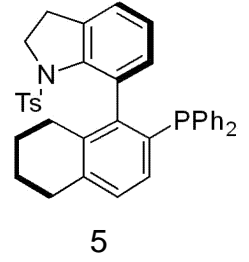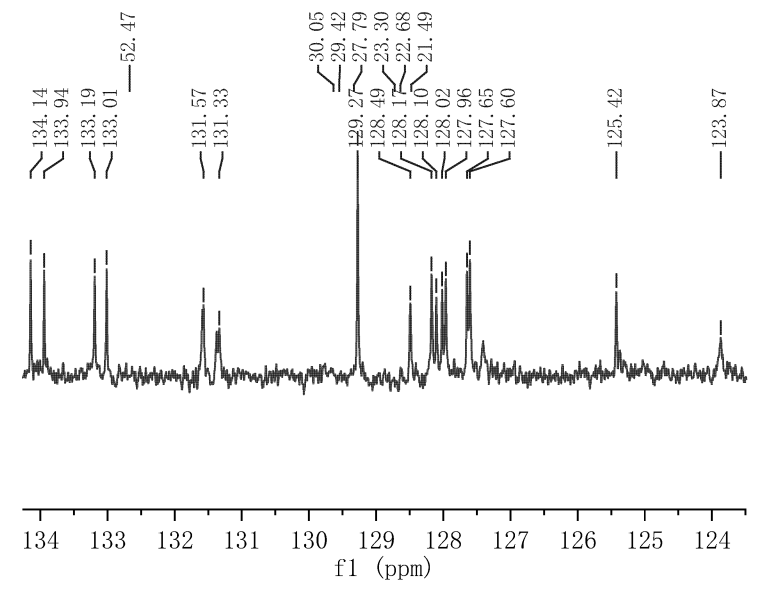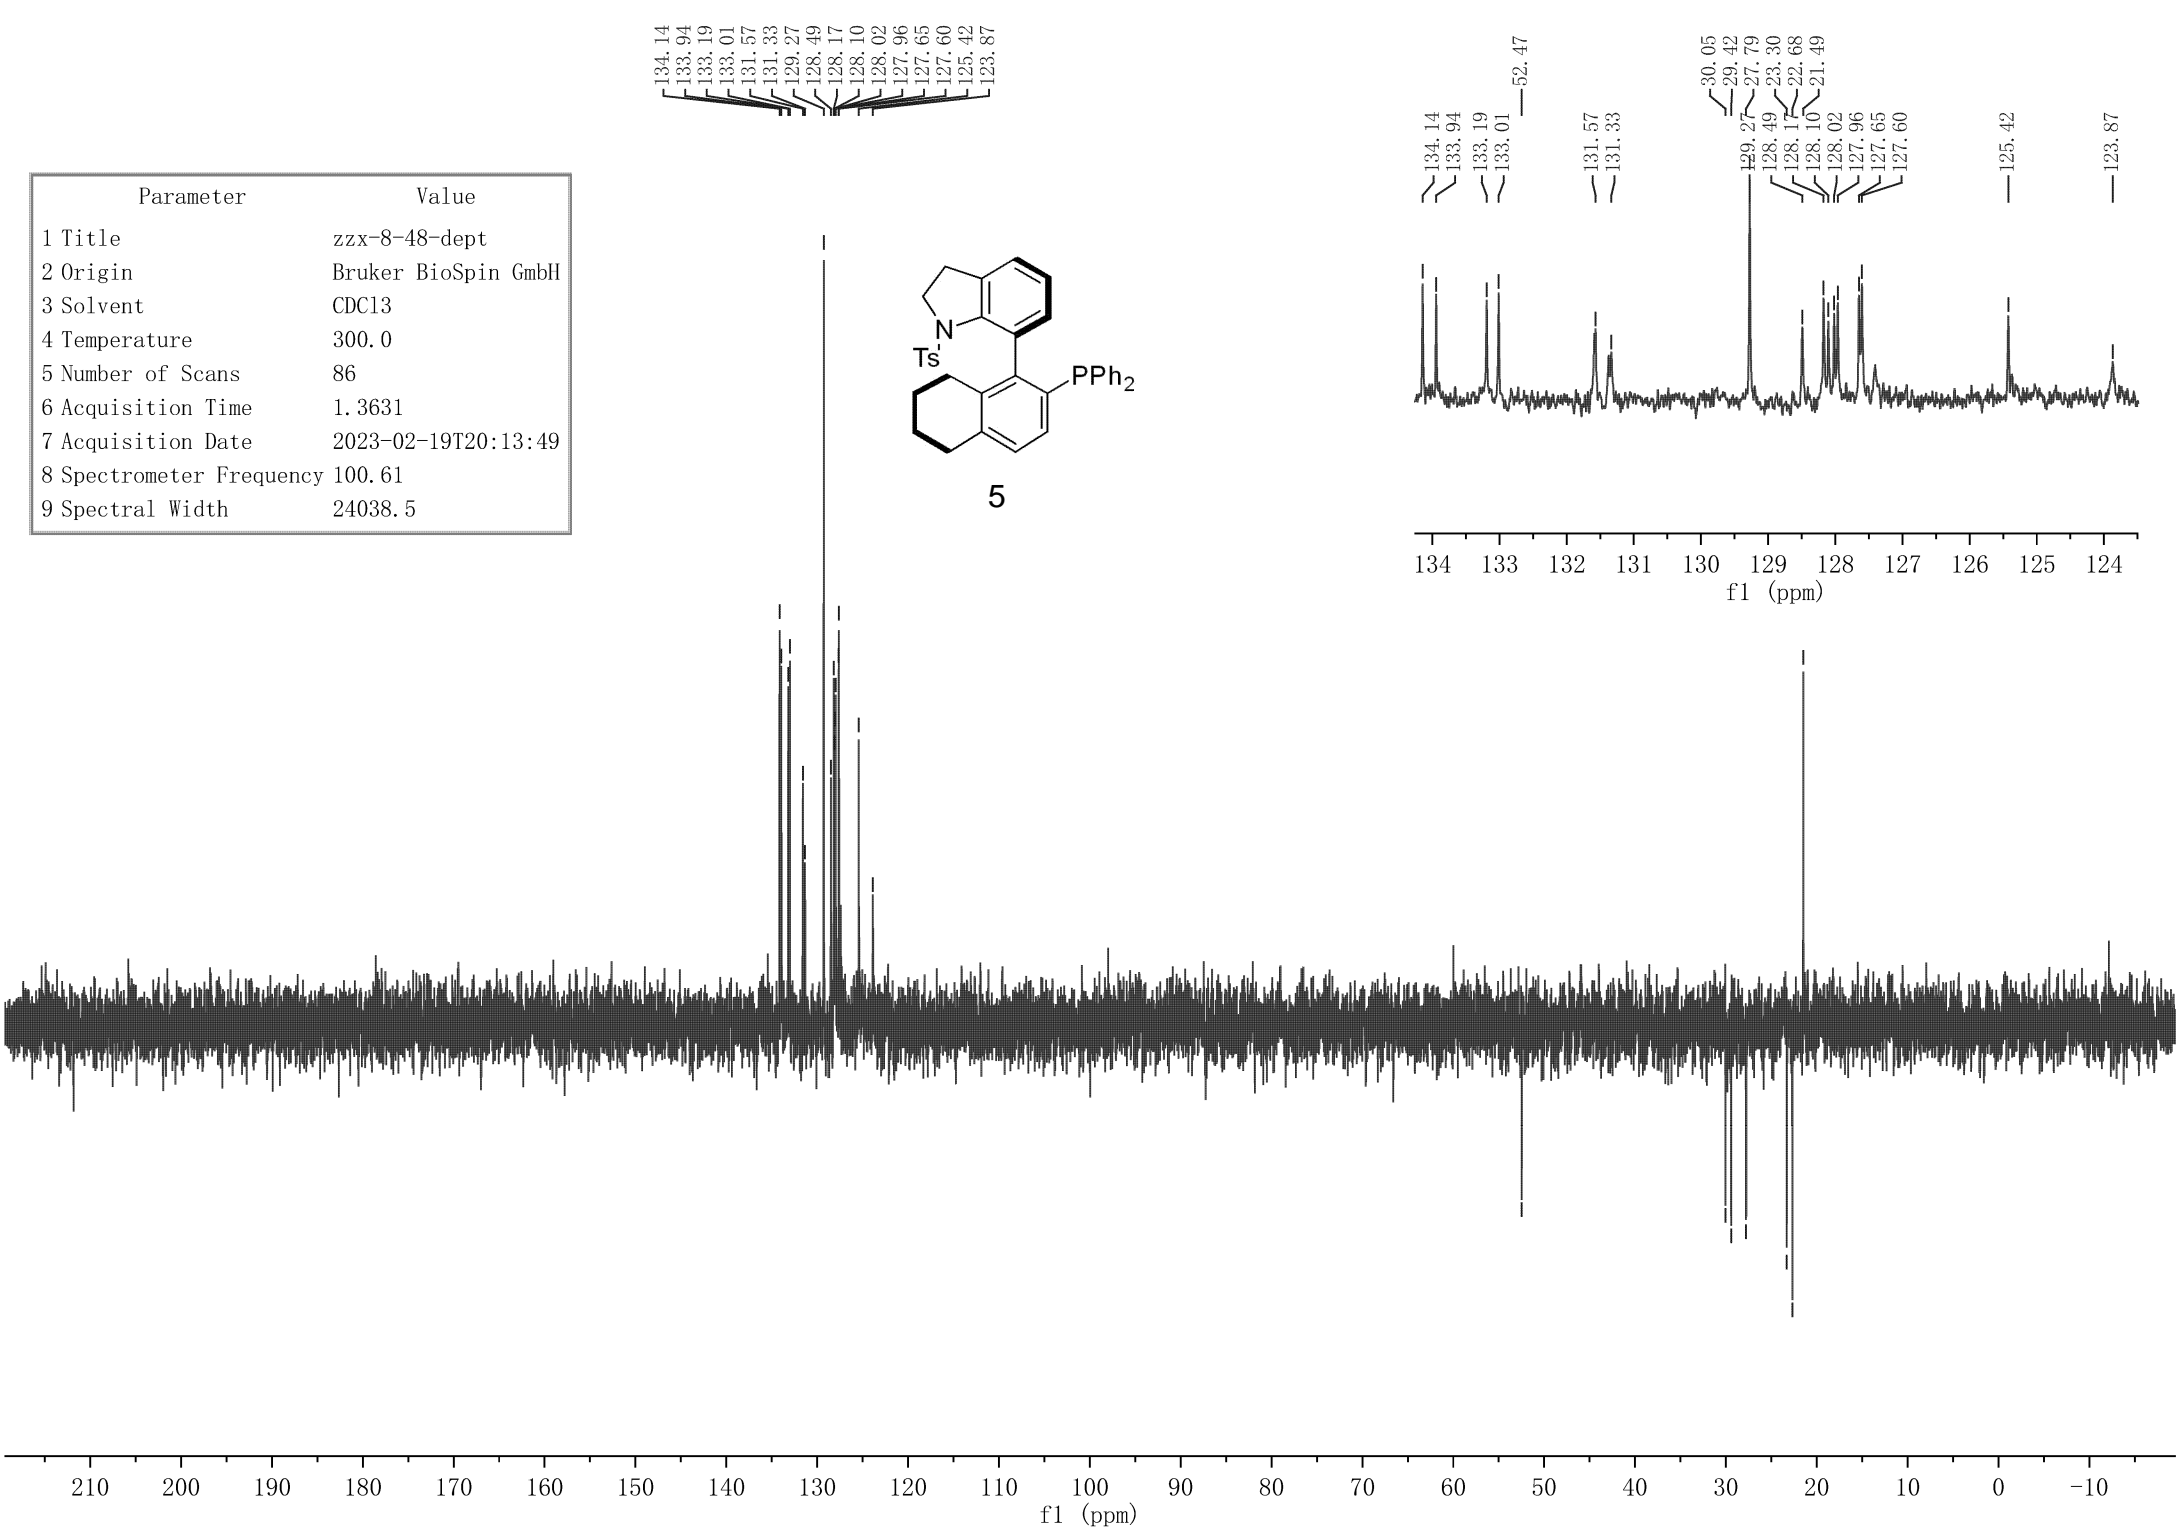

| Parameter                | Value               |
|--------------------------|---------------------|
| 1 Title                  | zzx-15-239          |
| 2 Origin                 |                     |
| 3 Solvent                | CDC13               |
| 4 Temperature            | 297.6               |
| 5 Number of Scans        | 32                  |
| 6 Acquisition Time       | 1.0000              |
| 7 Acquisition Date       | 2022-04-21T01:09:13 |
| 8 Spectrometer Frequency | 161.89              |
| 9 Spectral Width         | 66371.0             |

—12.55

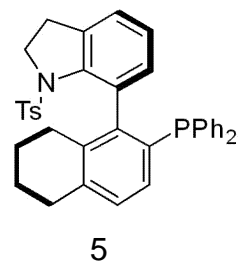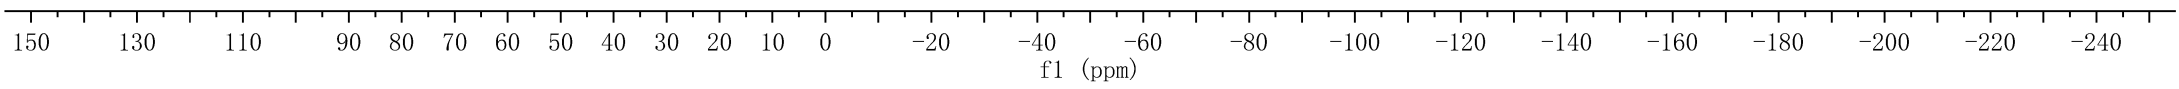

7.337  
7.309  
7.289  
7.276  
7.239  
7.200  
7.181  
7.140  
6.463  
6.424  
6.358  
6.338  
6.319  
6.298

4.177  
4.155  
4.150  
4.129  
3.747  
3.719

1.416  
1.218

0.000

| Parameter                | Value               |
|--------------------------|---------------------|
| 1 Title                  | ZZX-18-51-4-1       |
| 2 Origin                 |                     |
| 3 Solvent                | CDC13               |
| 4 Temperature            | 297.0               |
| 5 Number of Scans        | 16                  |
| 6 Acquisition Time       | 4.0002              |
| 7 Acquisition Date       | 2023-02-23T01:53:31 |
| 8 Spectrometer Frequency | 399.90              |
| 9 Spectral Width         | 8012.0              |

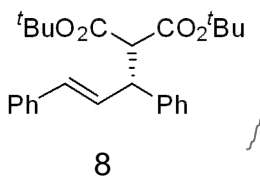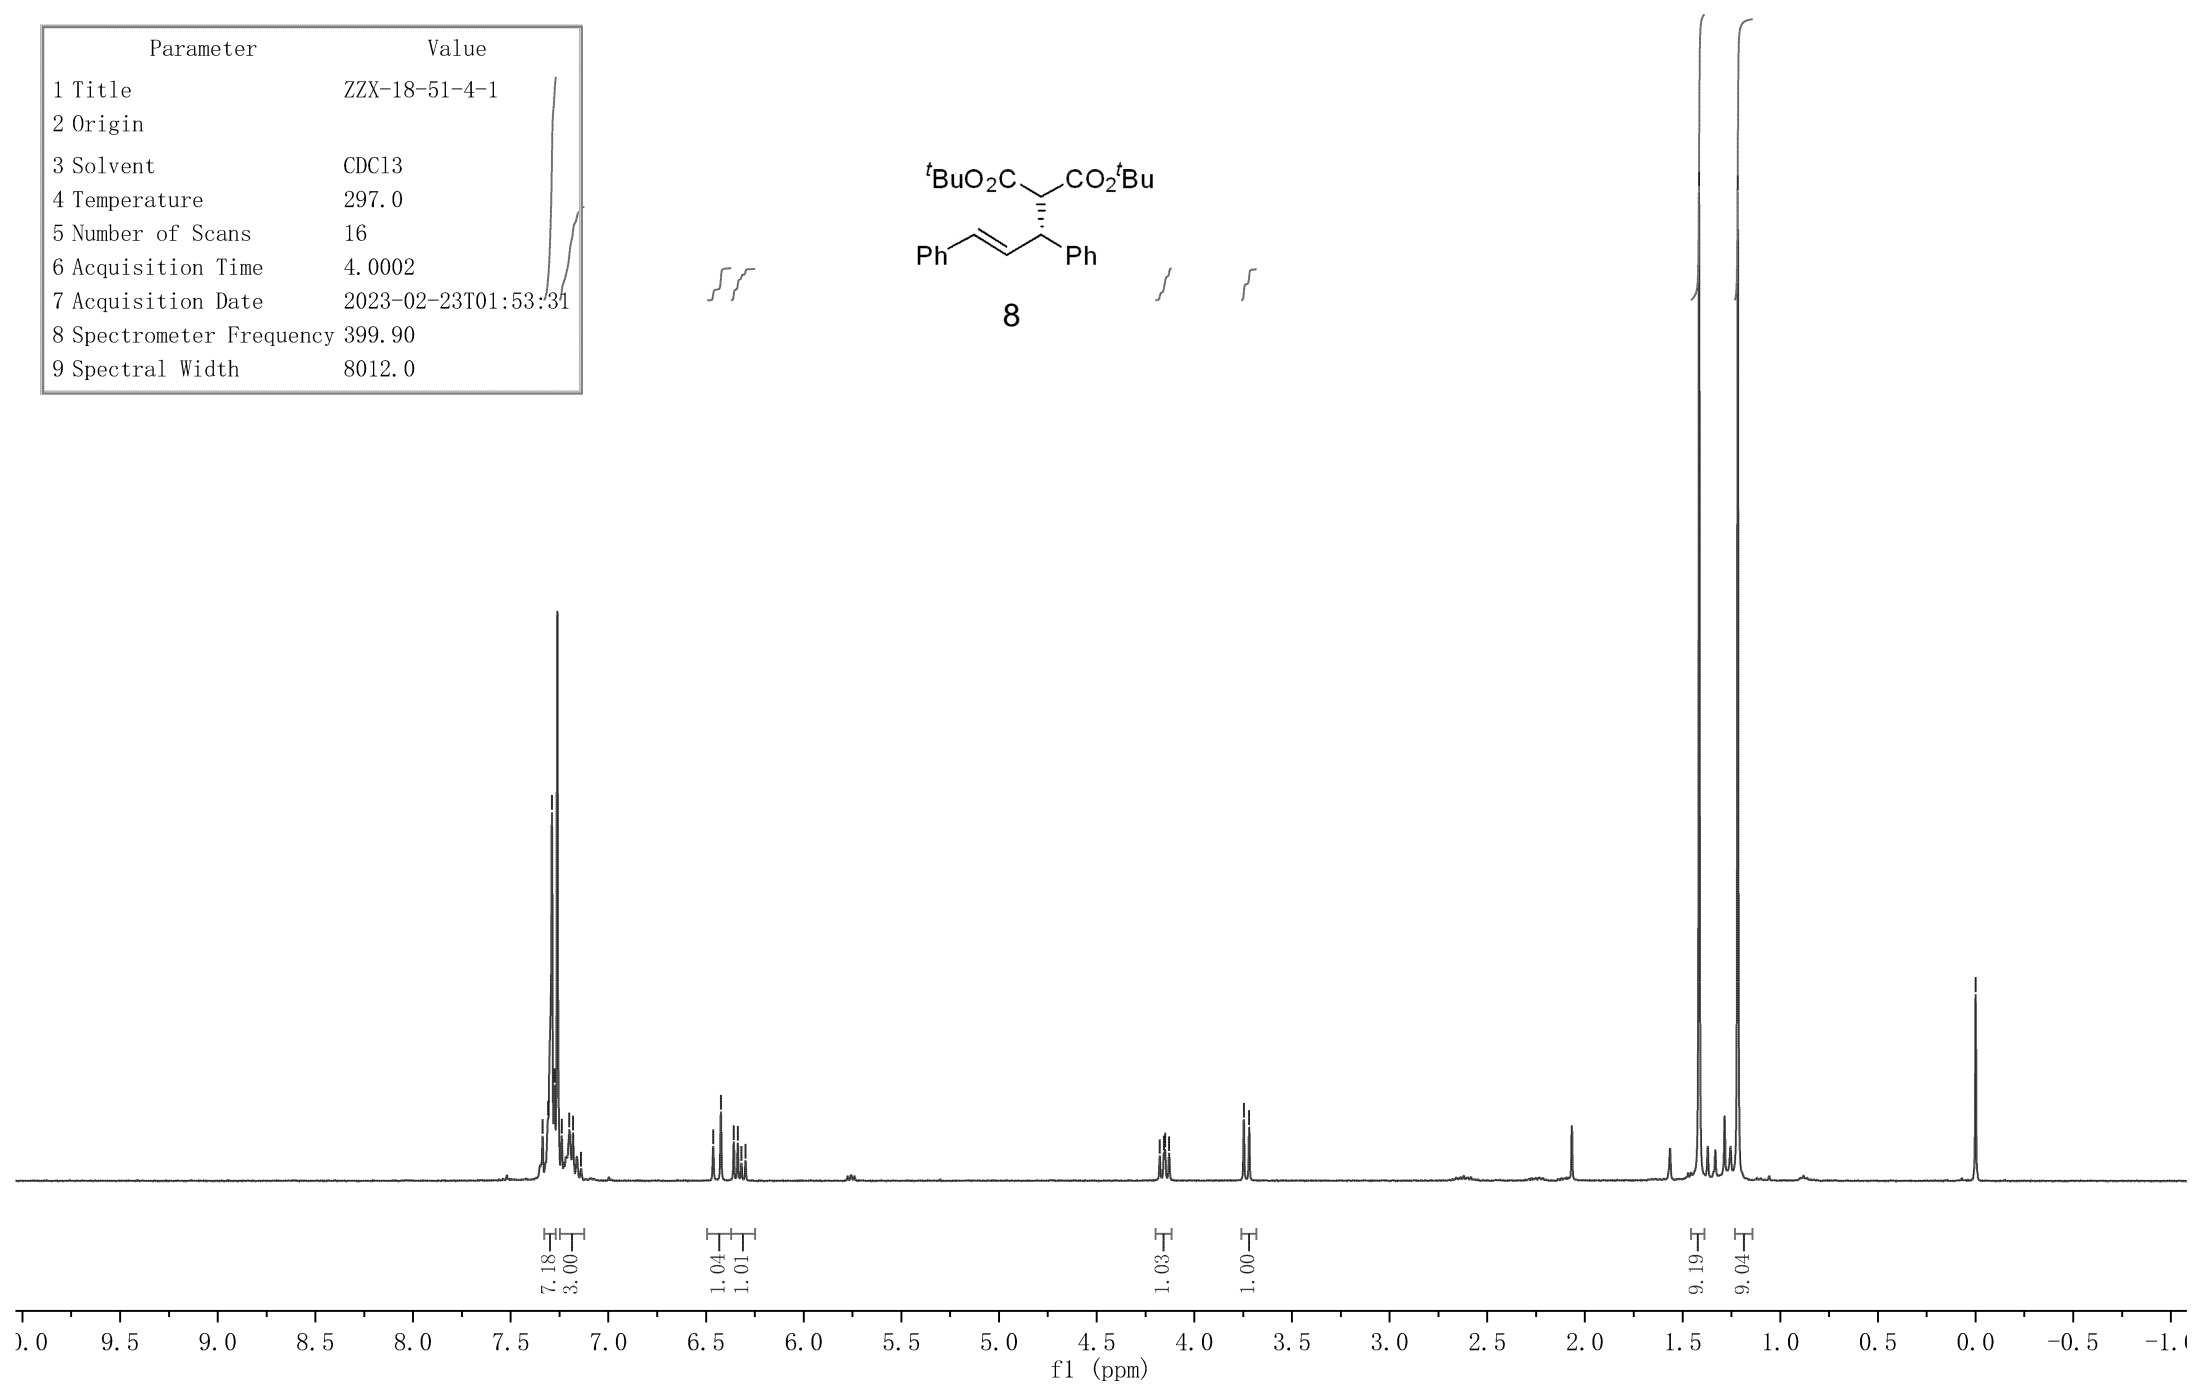

| Parameter                | Value               |
|--------------------------|---------------------|
| 1 Title                  | ZZX-18-51-4-1       |
| 2 Origin                 |                     |
| 3 Solvent                | CDC13               |
| 4 Temperature            | 297.0               |
| 5 Number of Scans        | 3000                |
| 6 Acquisition Time       | 1.0000              |
| 7 Acquisition Date       | 2023-02-23T03:36:25 |
| 8 Spectrometer Frequency | 100.56              |
| 9 Spectral Width         | 26041.0             |

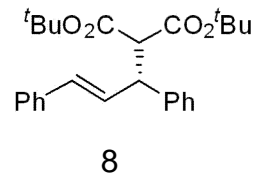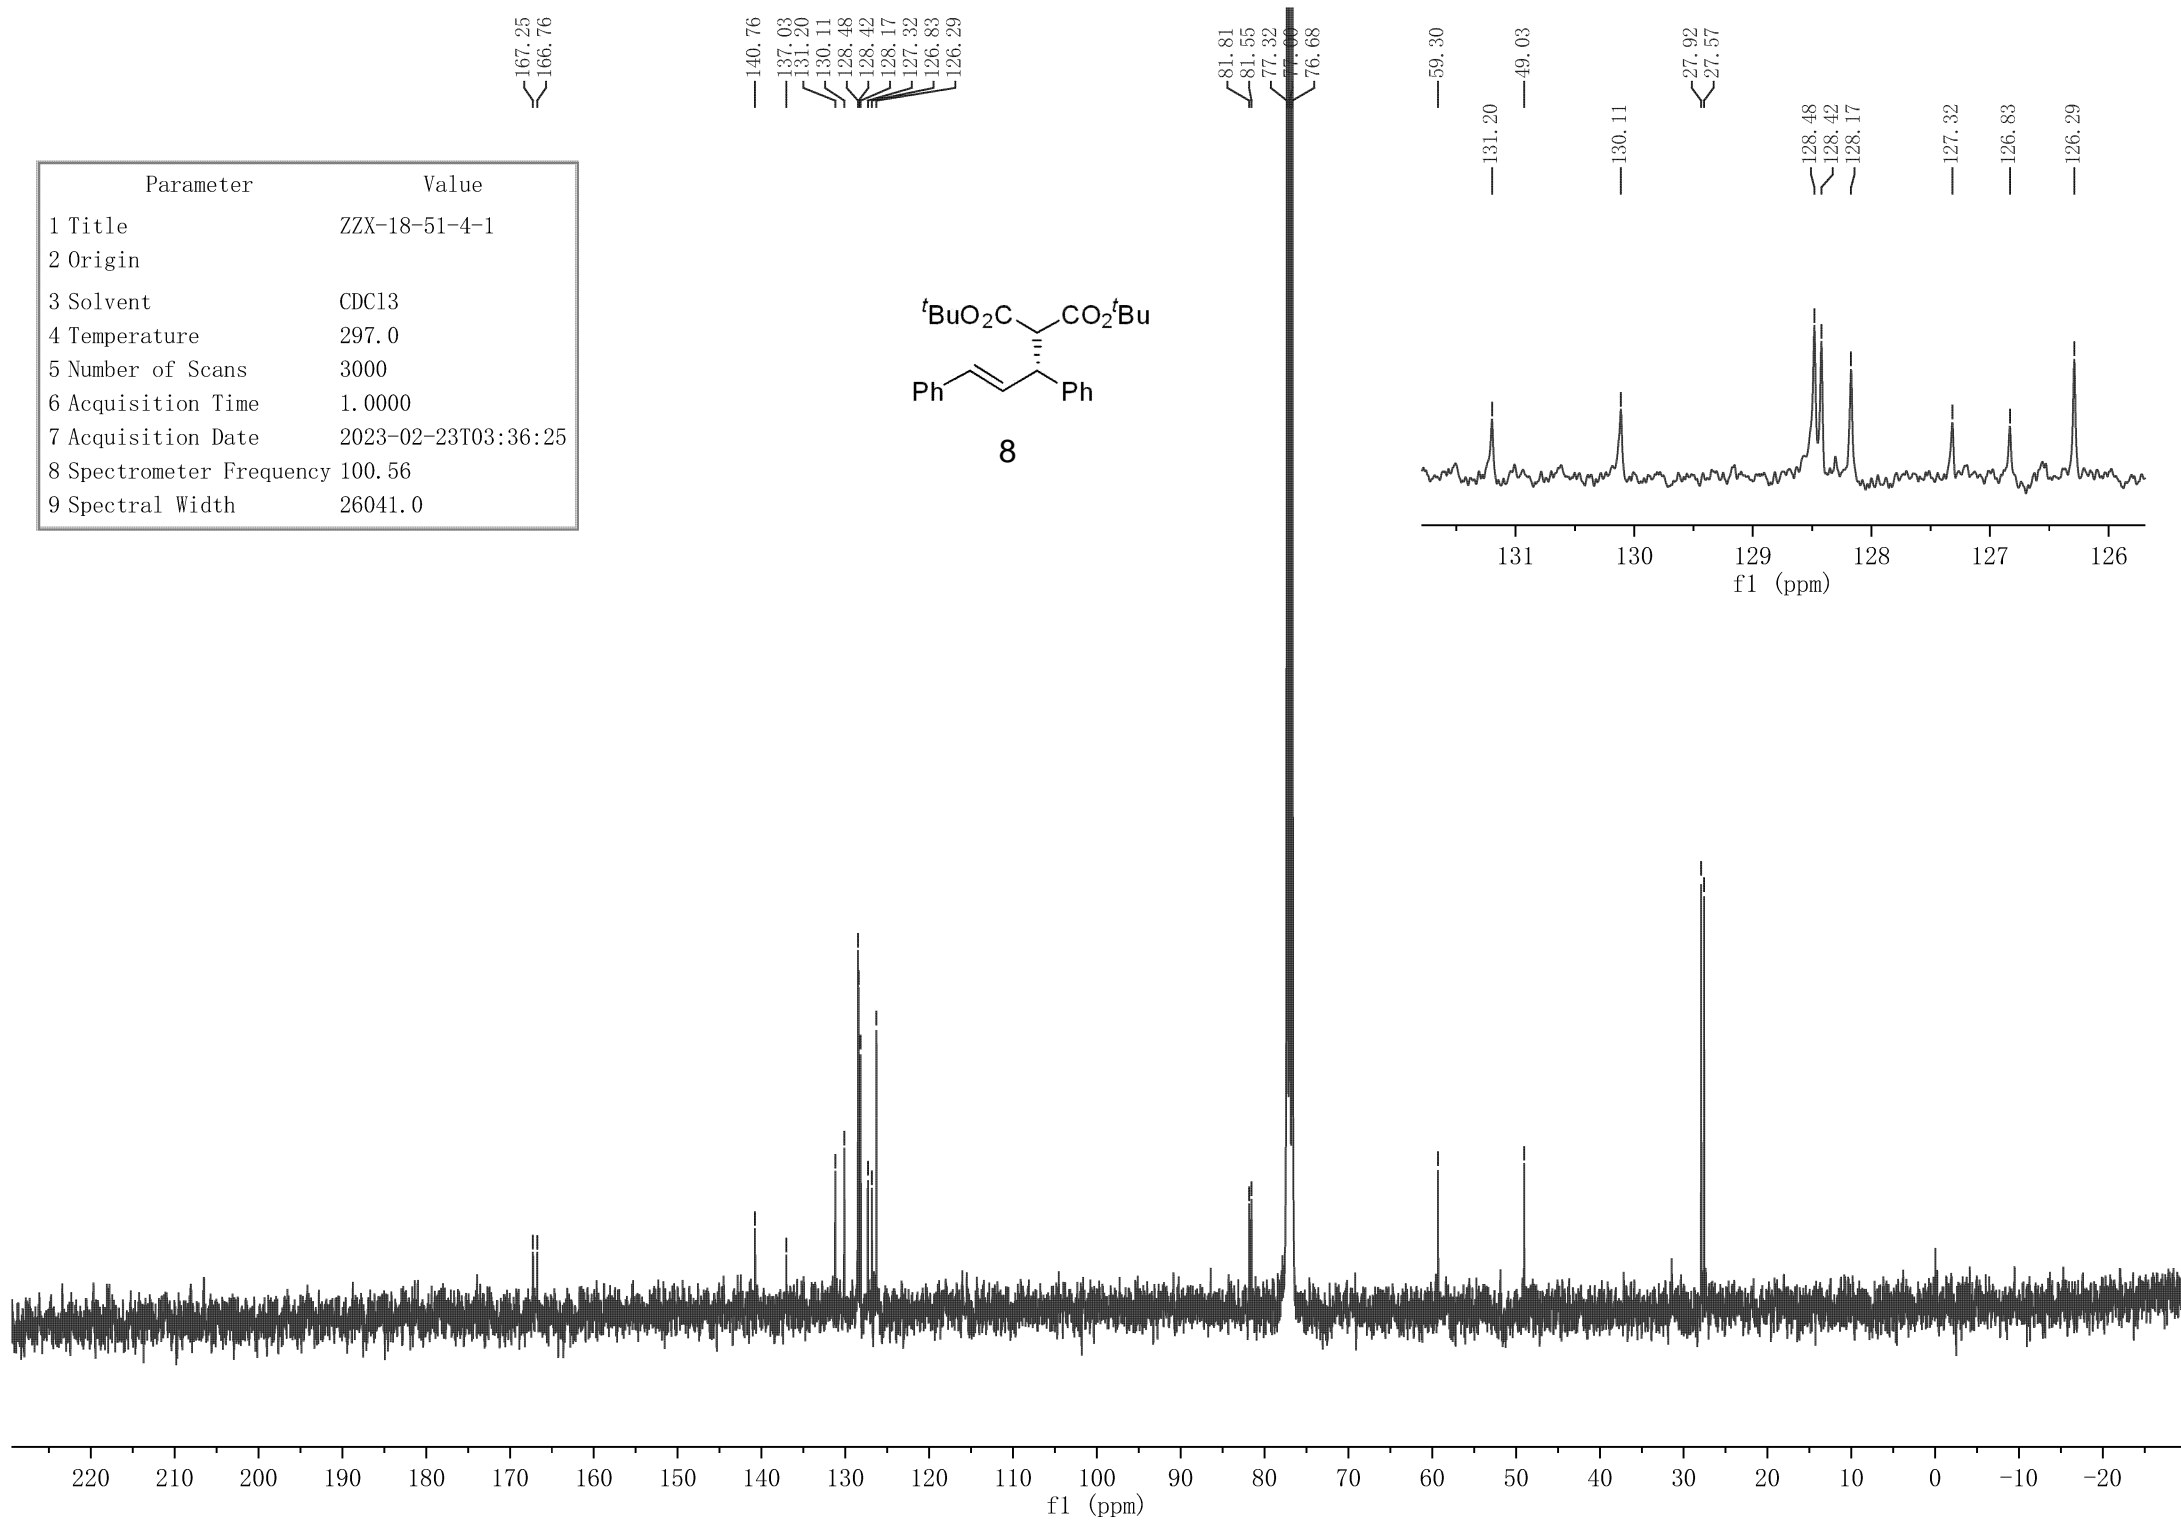

Supplement: d3sc01880f1.pdf [file d3sc01880f1.pdf]
